# Supplementary material for: Gender-specific pathway differences in the human serum metabolome
Source: Springer Nature journal article supplement (doi:10.1007/s11306-015-0829-0), 2015-08-03

## **Boxplots of metabolite and pathway differences for KORA and the SHIP replication cohort.**

Contents:

- KORA metabolite boxplots
- KORA pathway boxplots
- SHIP metabolite boxplots
- SHIP pathway boxplots

## KORA metabolite boxplots

p-val: 5.26e-003

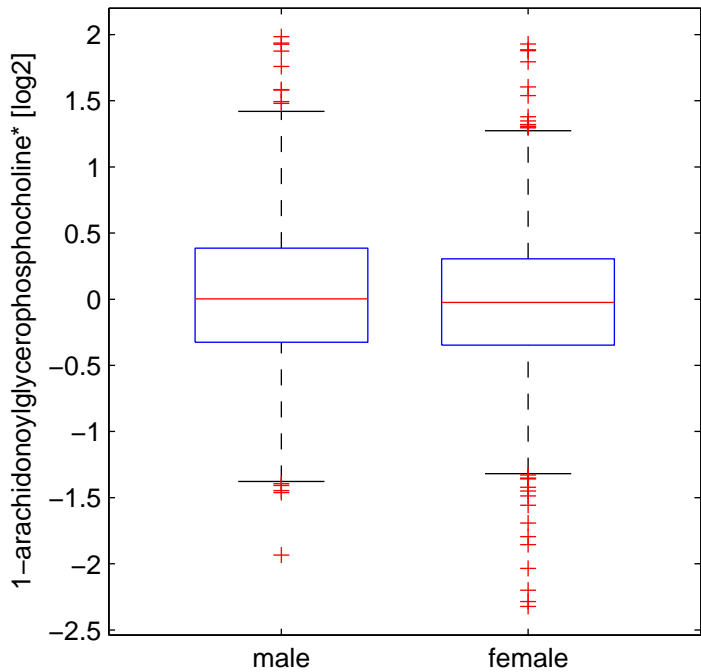

p-val: 2.18e-004

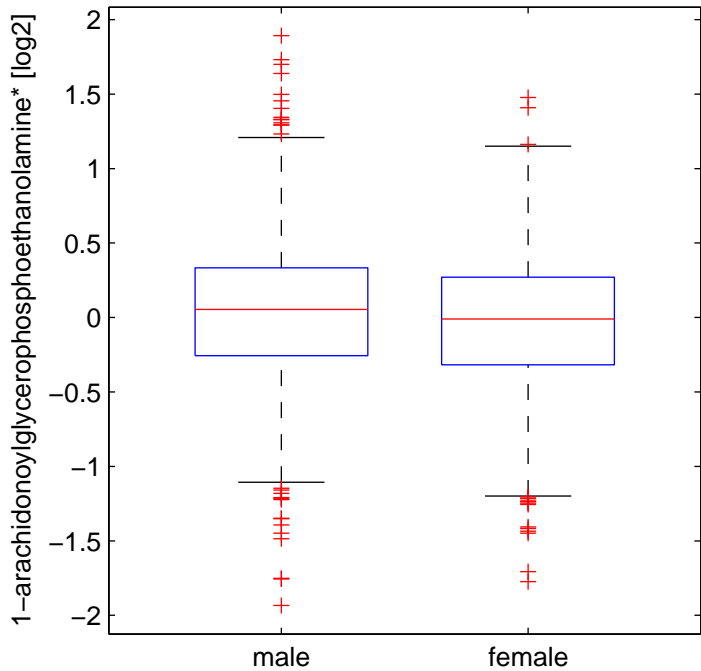

p-val: 1.55e-002

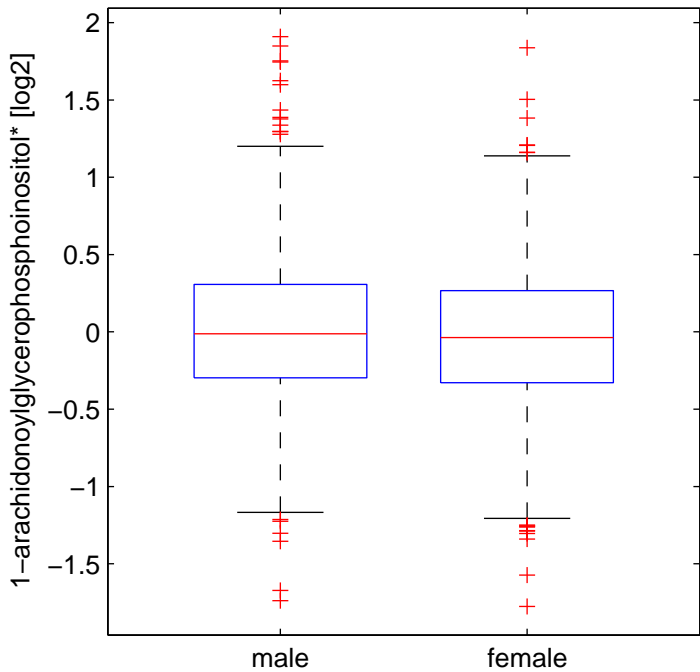

p-val: 5.18e-001

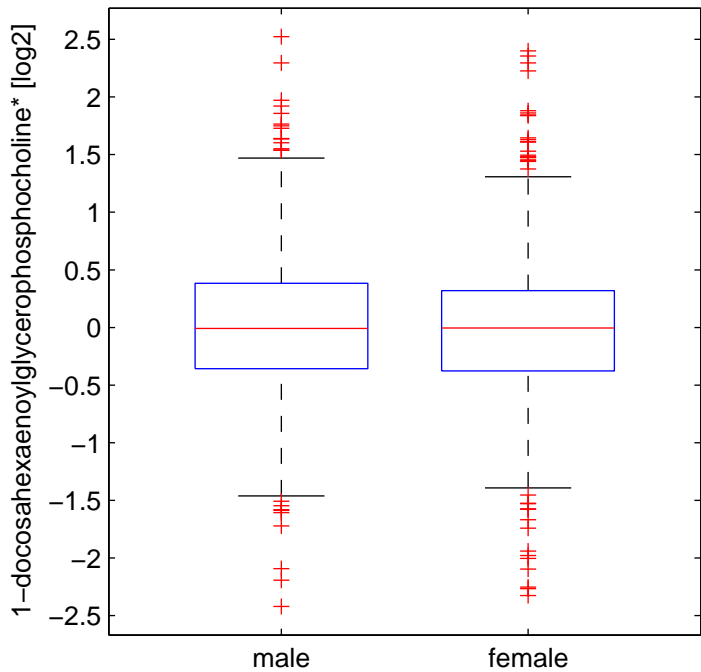

p-val: 5.70e-001

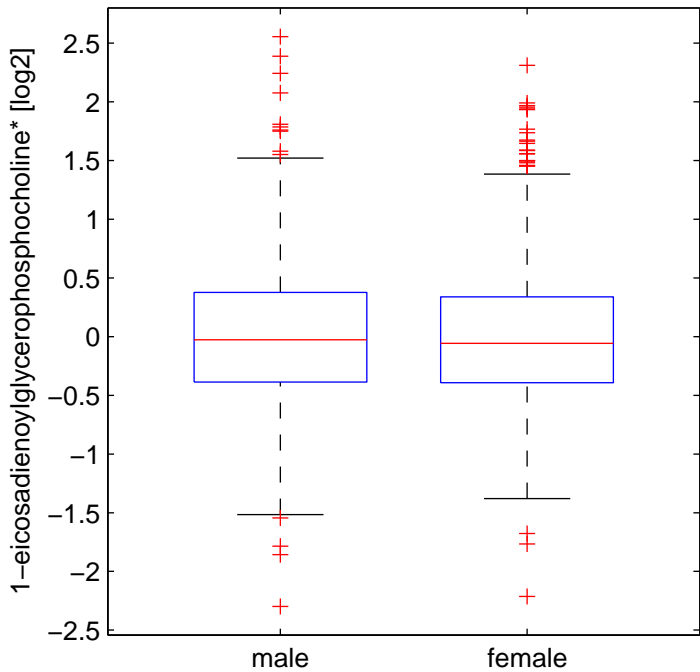

p-val: 7.41e-001

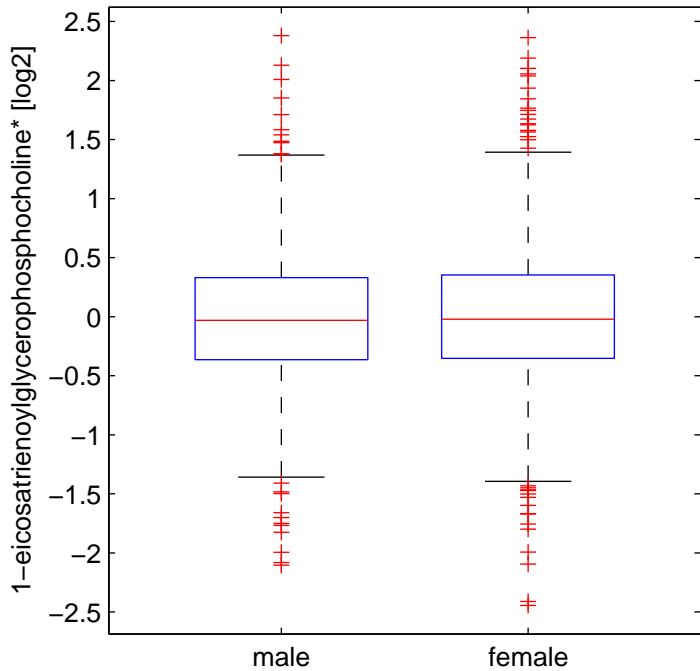



p-val: 4.50e-001

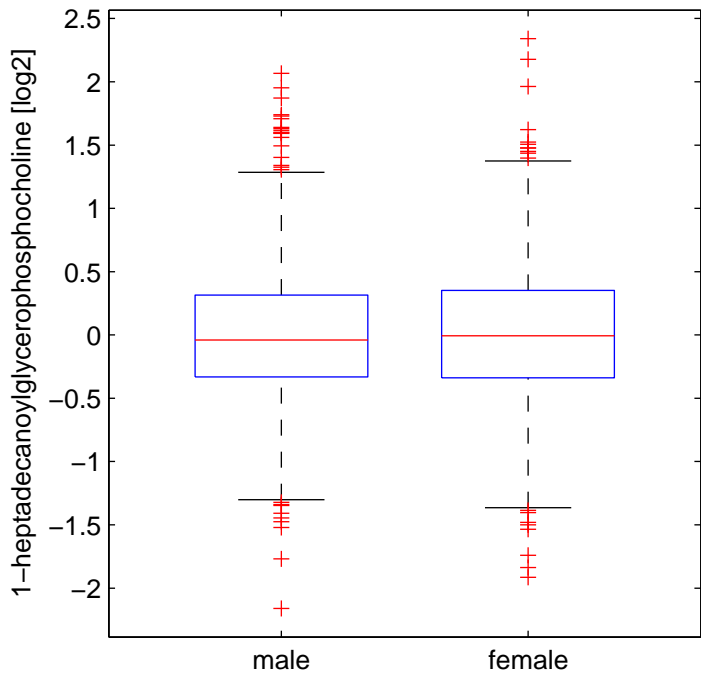

p-val: 8.53e-001

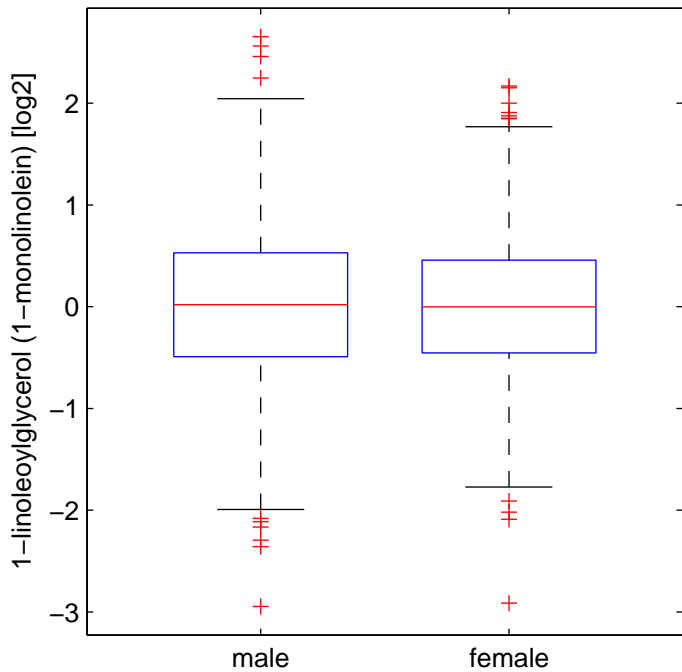

p-val: 1.43e-002

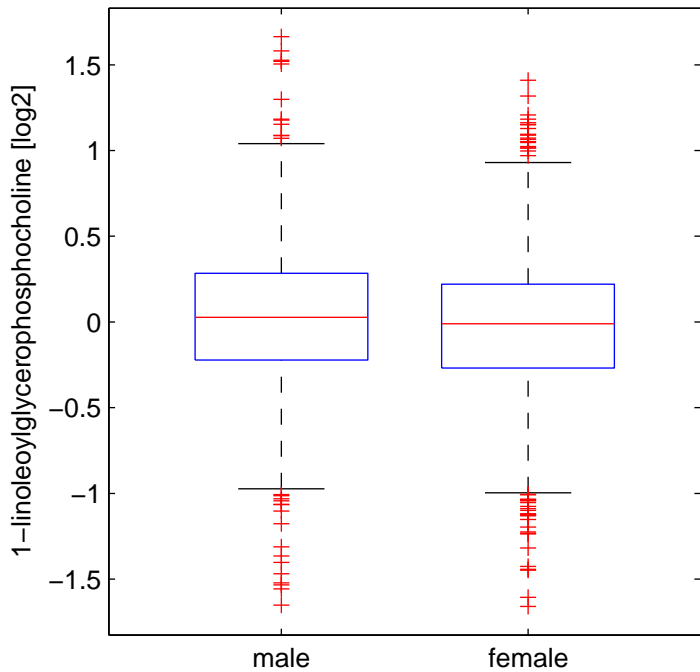

p-val: 8.76e-003

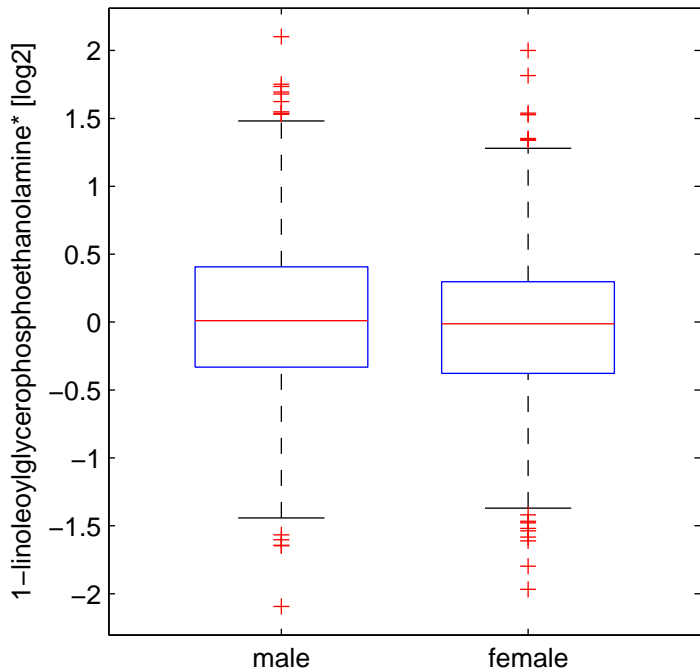

p-val: 3.47e-003

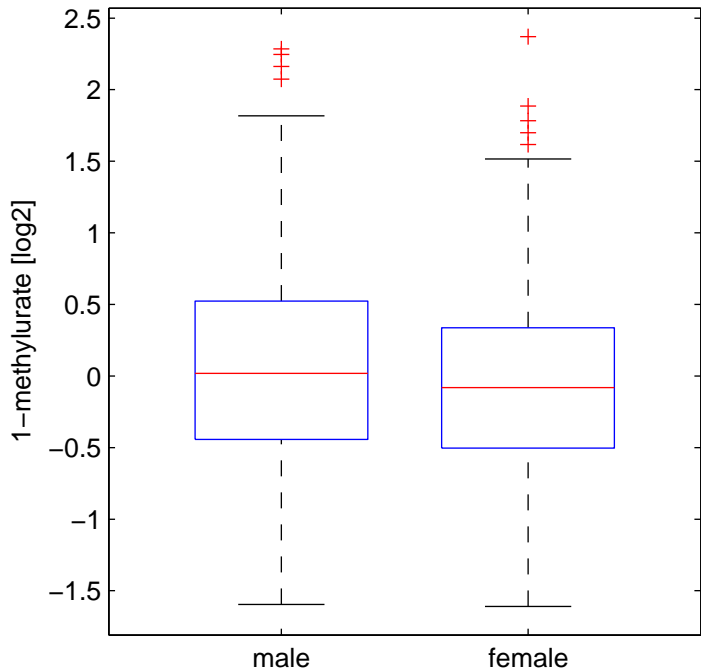

p-val: 9.52e-003

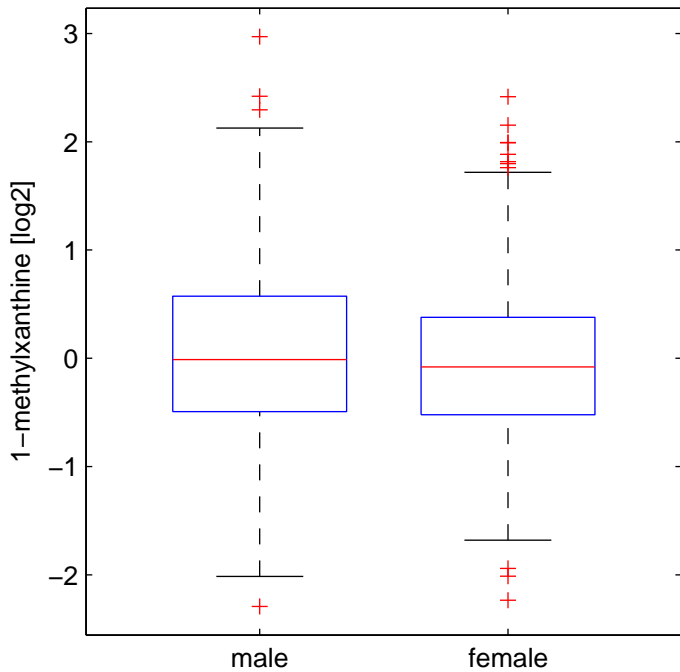

p-val: 5.14e-001

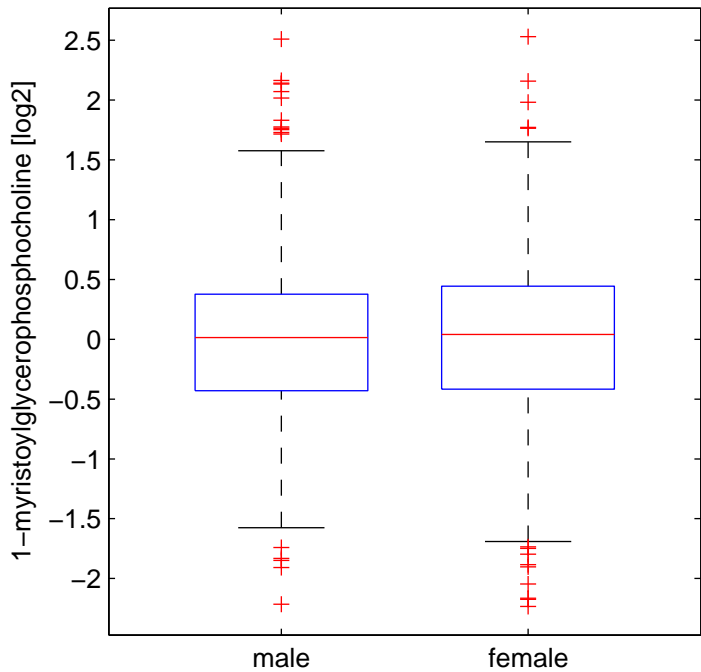

p-val: 1.19e-003

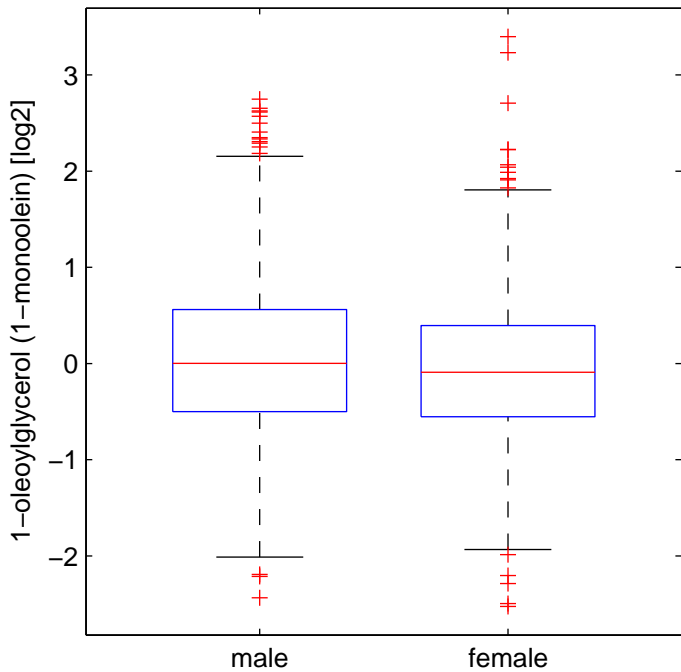



p-val: 2.04e-004

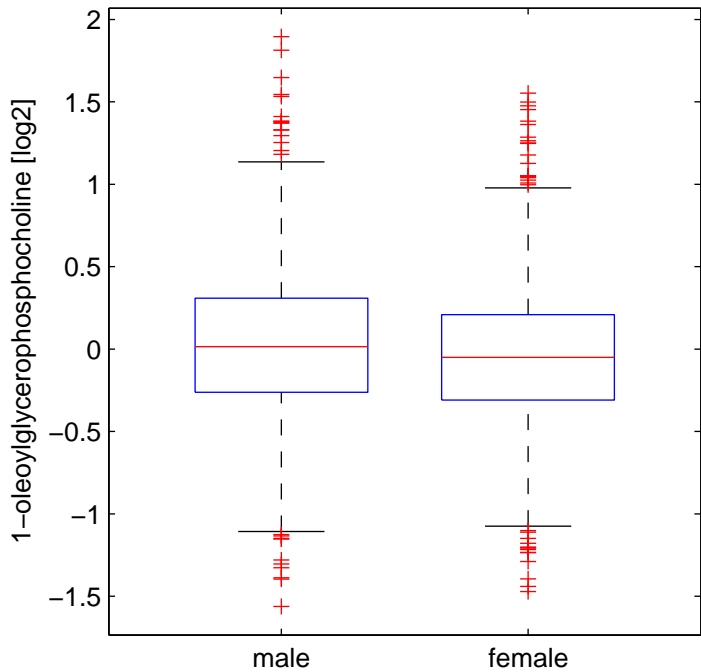

p-val: 1.15e-014

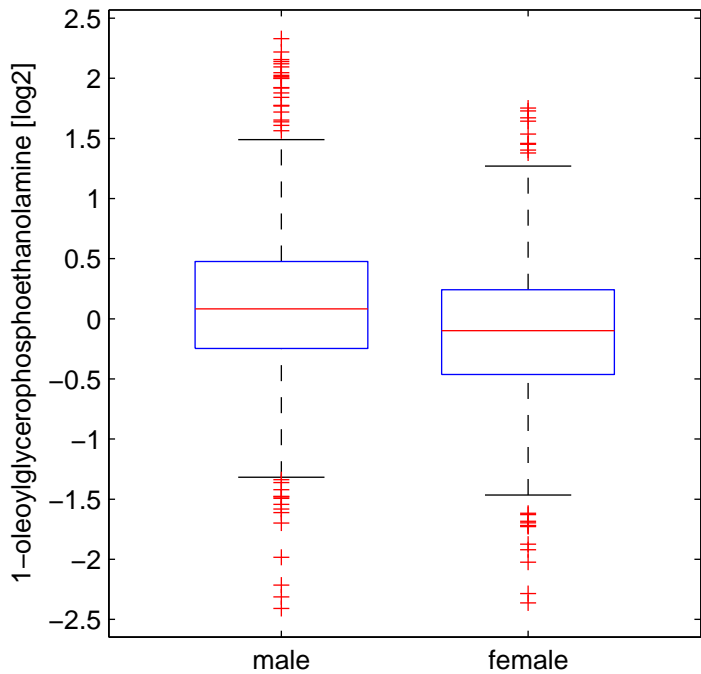

p-val: 3.74e-001

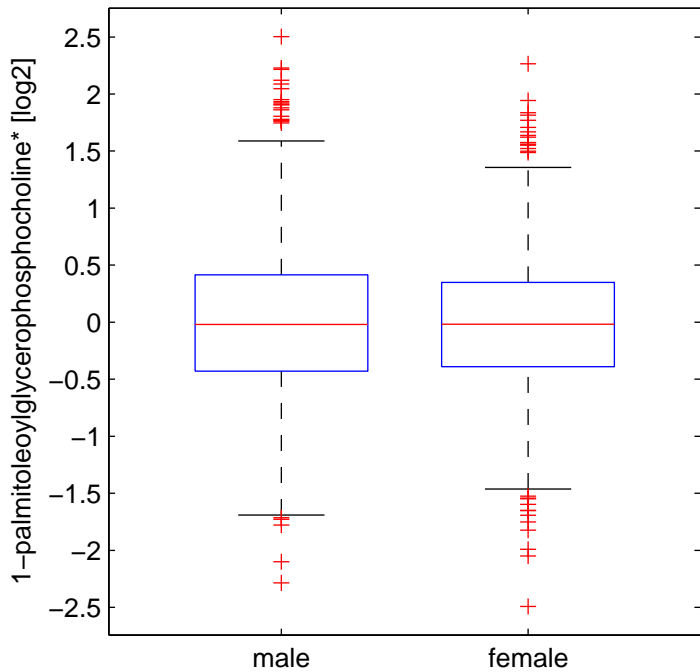

p-val: 2.02e-001

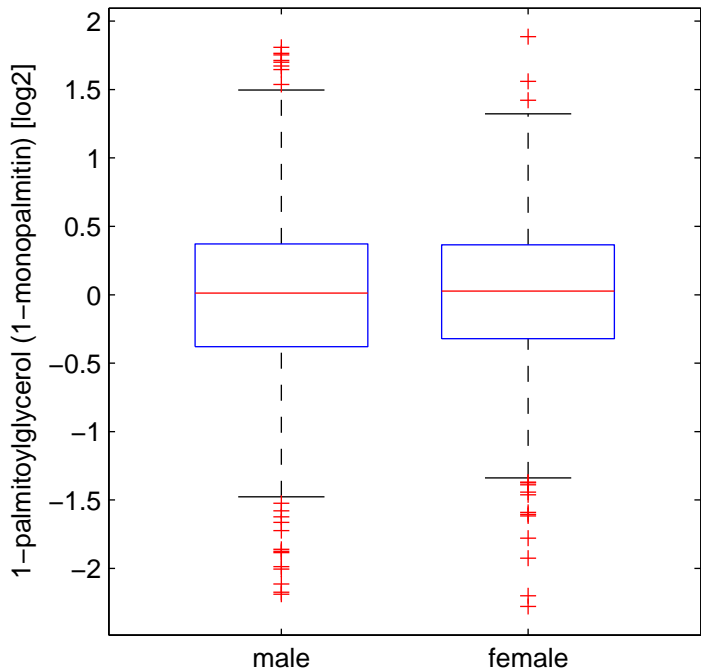

p-val: 4.12e-003

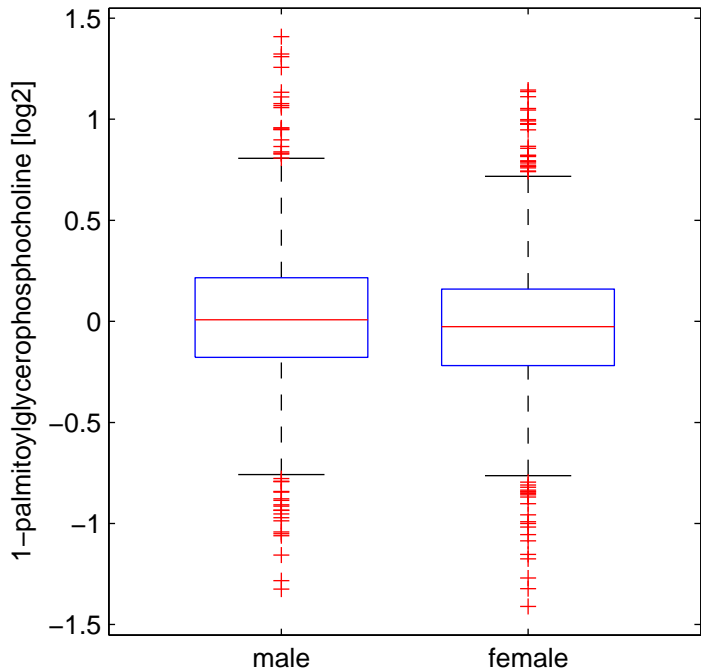

p-val: 4.80e-001

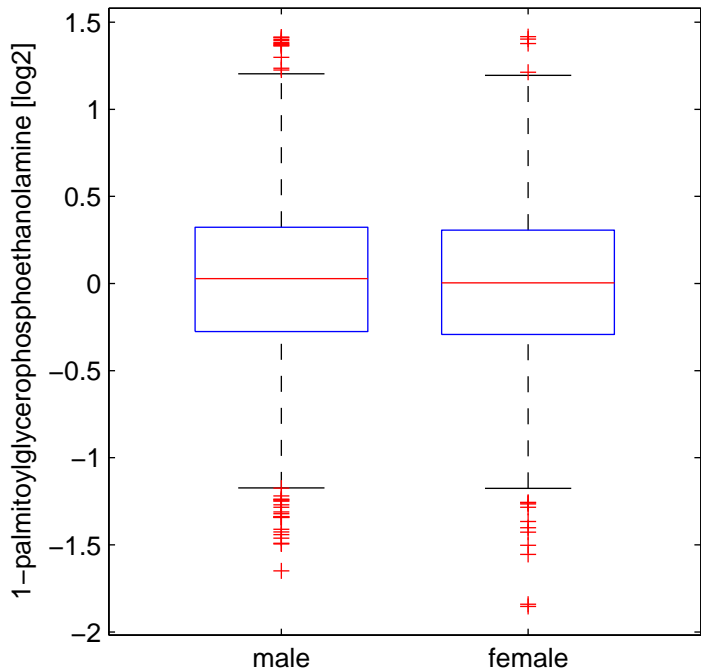

p-val: 1.10e-002

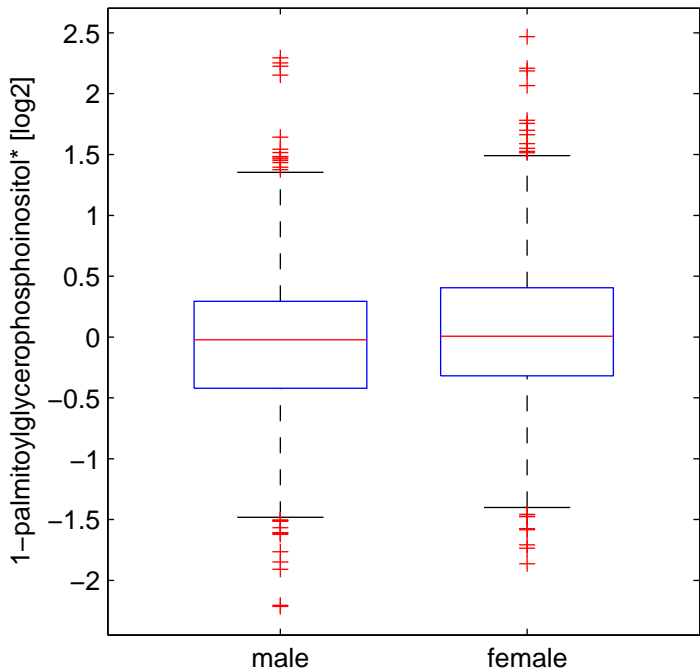

p-val: 1.62e-002

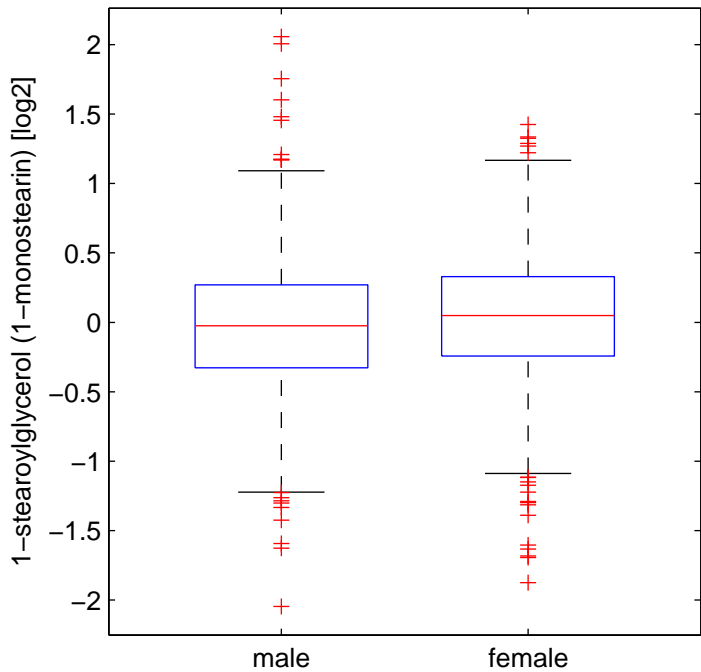



p-val: 1.18e-001

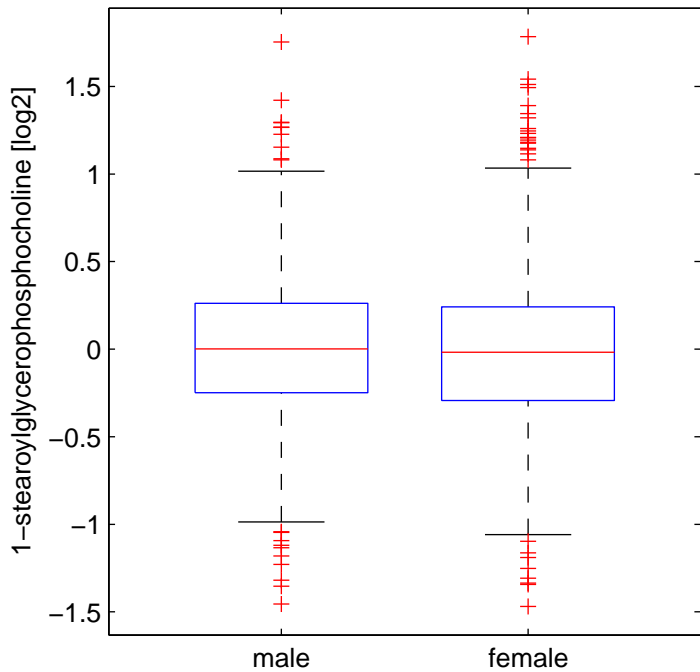

p-val: 2.44e-002

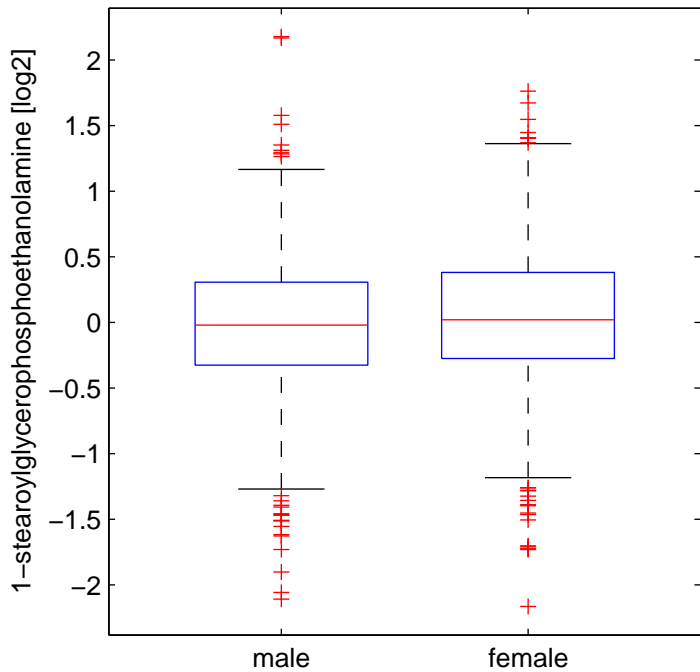

p-val: 9.20e-004

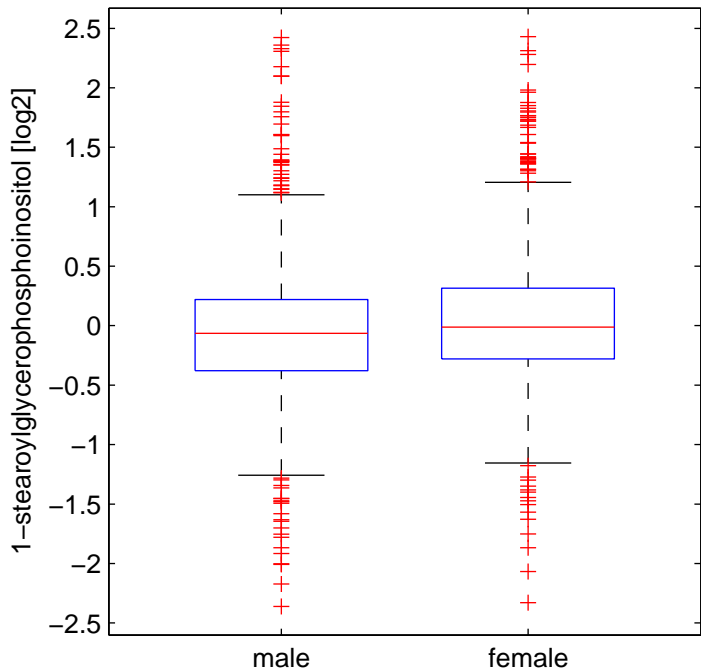

p-val: 6.04e-001

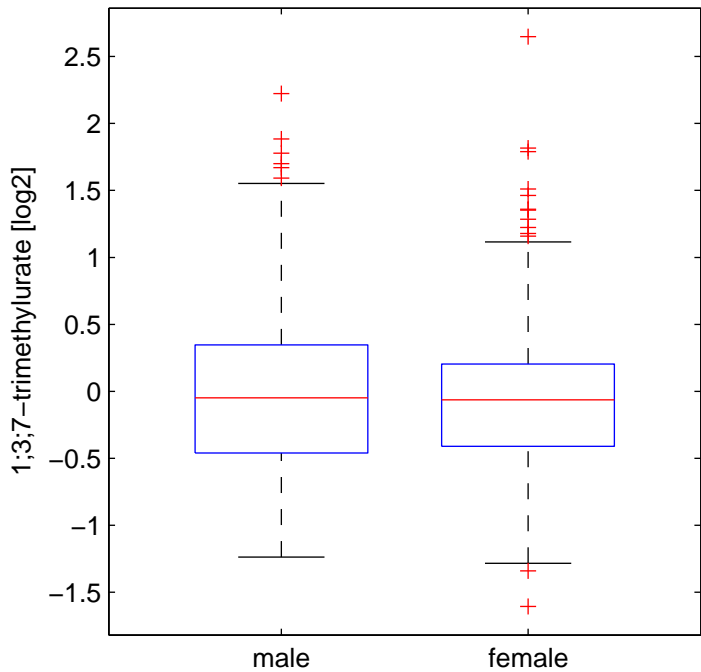

p-val: 6.72e-017

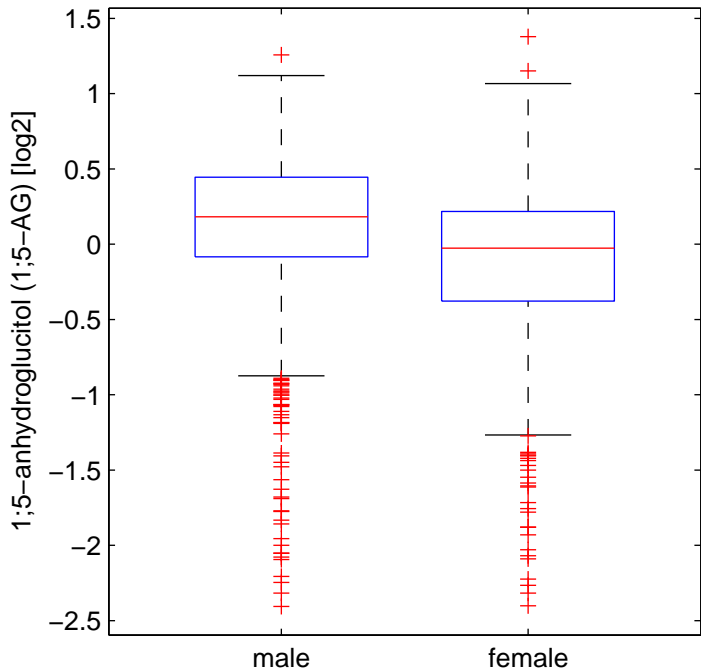

p-val: 3.95e-001

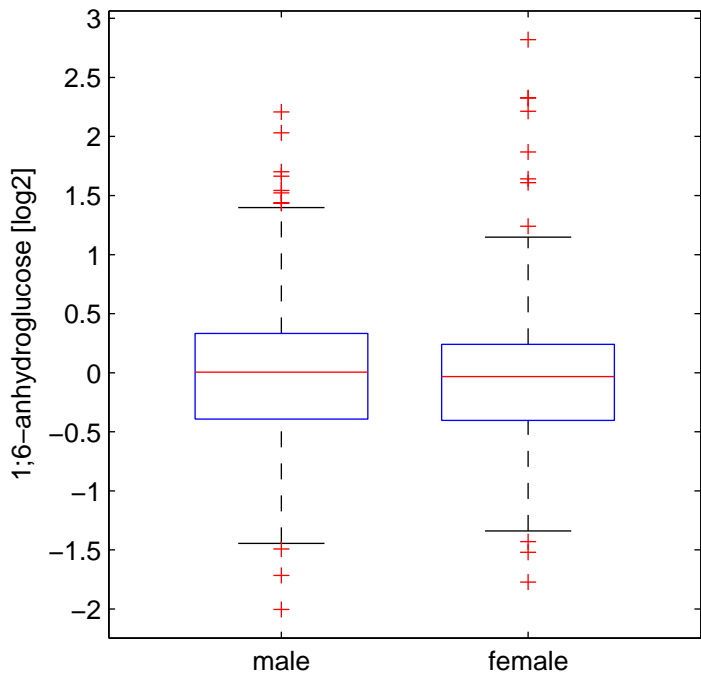

p-val: 8.00e-001

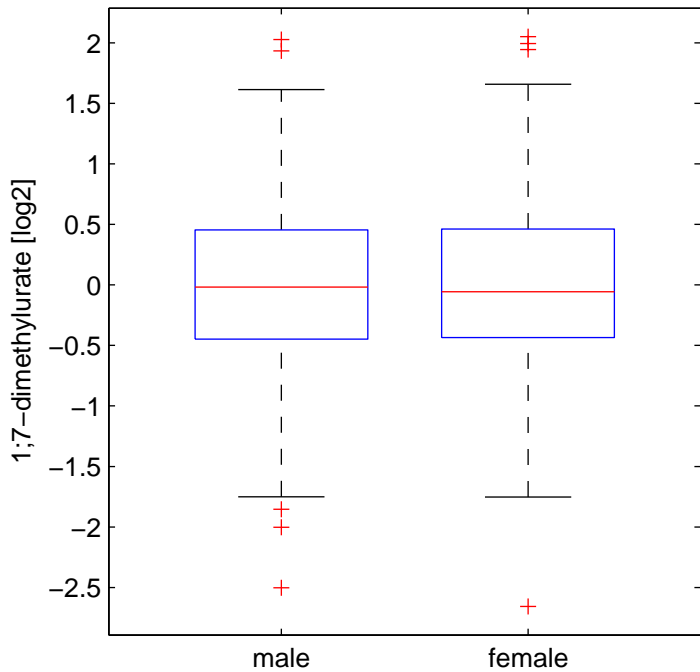

p-val: 1.54e-028

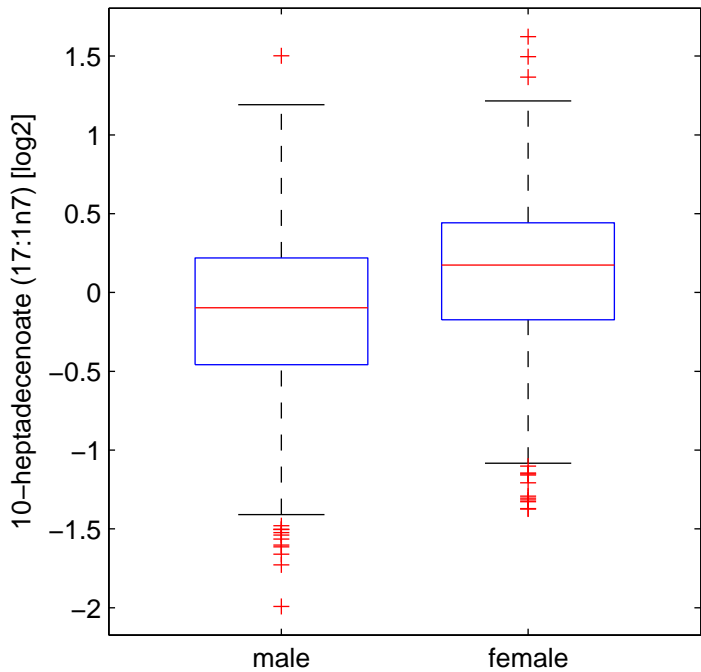



p-val: 1.62e-012

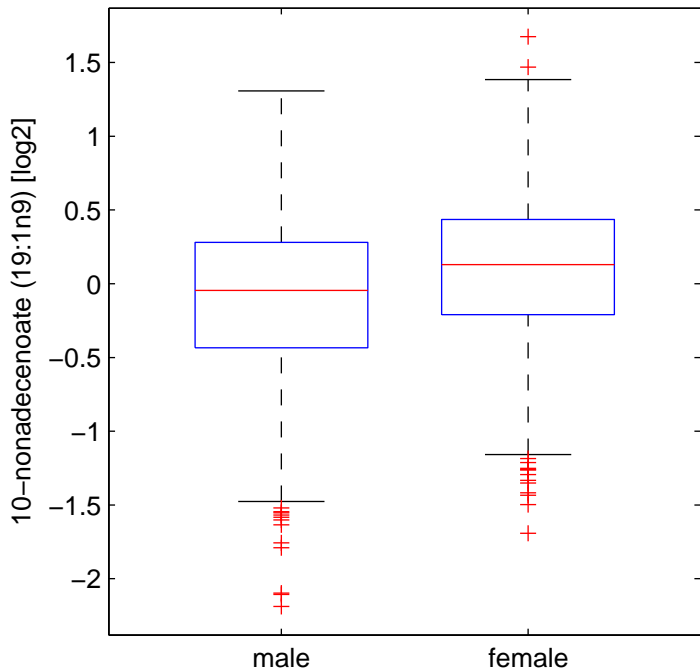

p-val: 1.44e-003

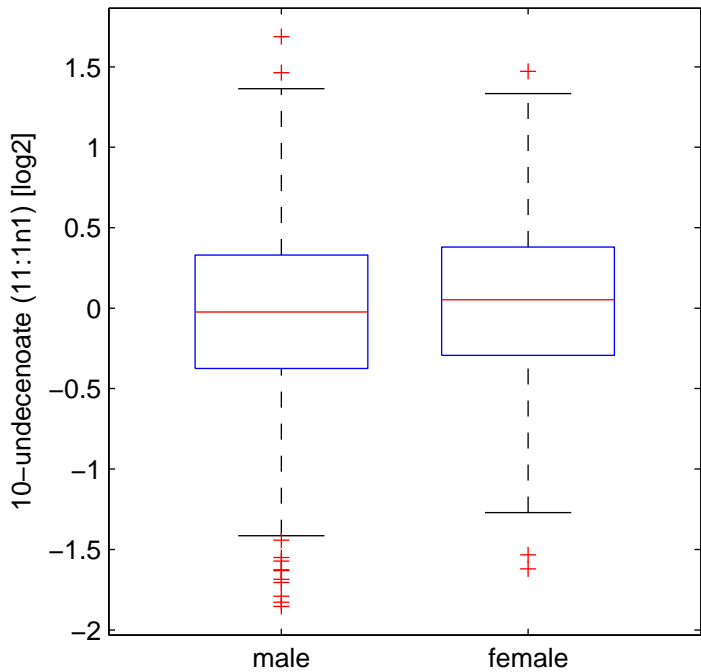

p-val: 5.75e-003

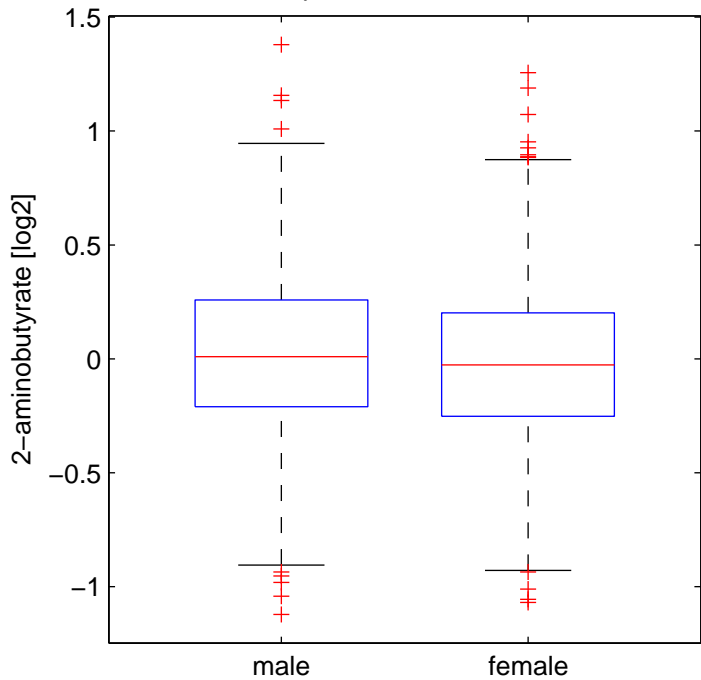

p-val: 1.94e-001

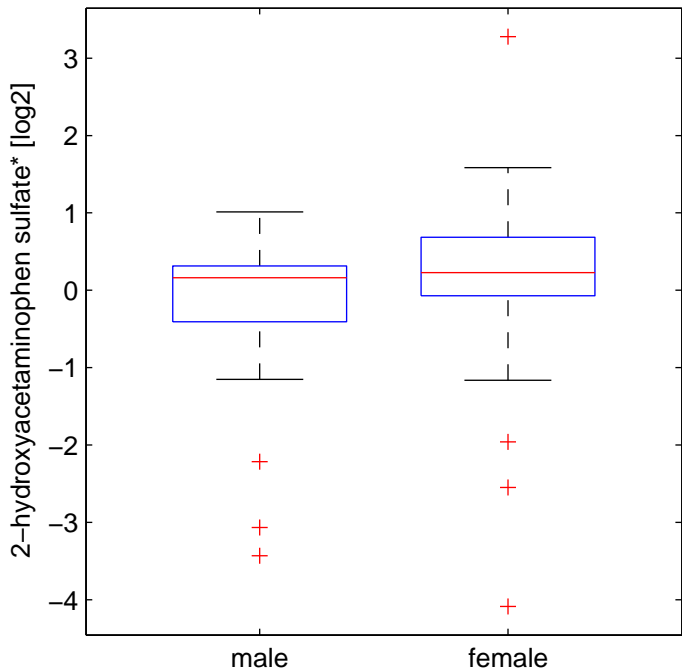

p-val: 2.32e-009

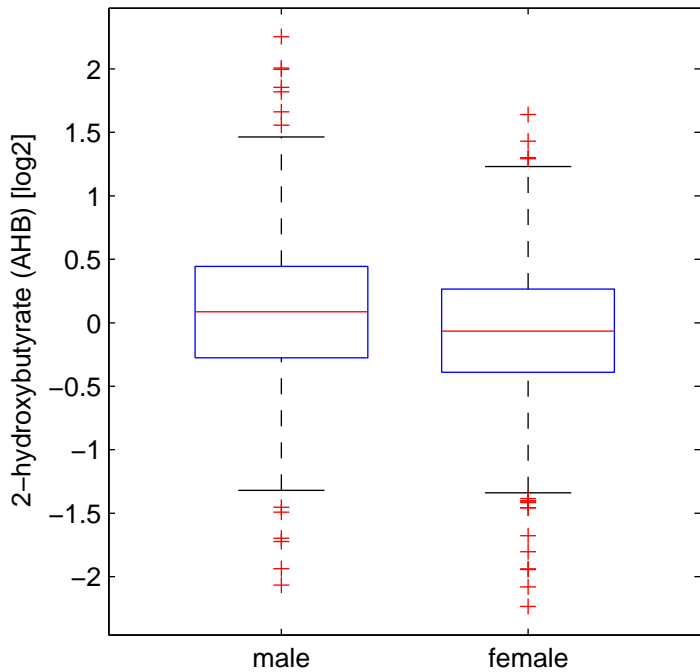

p-val: 1.36e-001

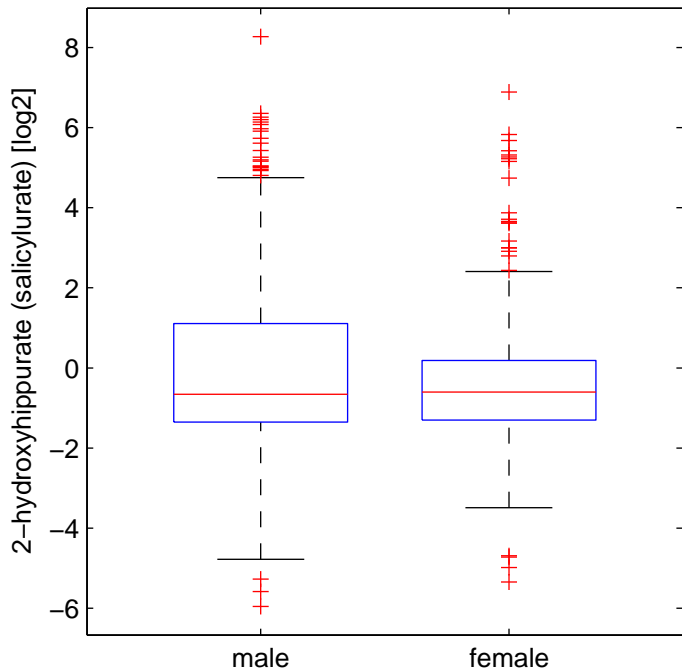

p-val: 2.56e-005

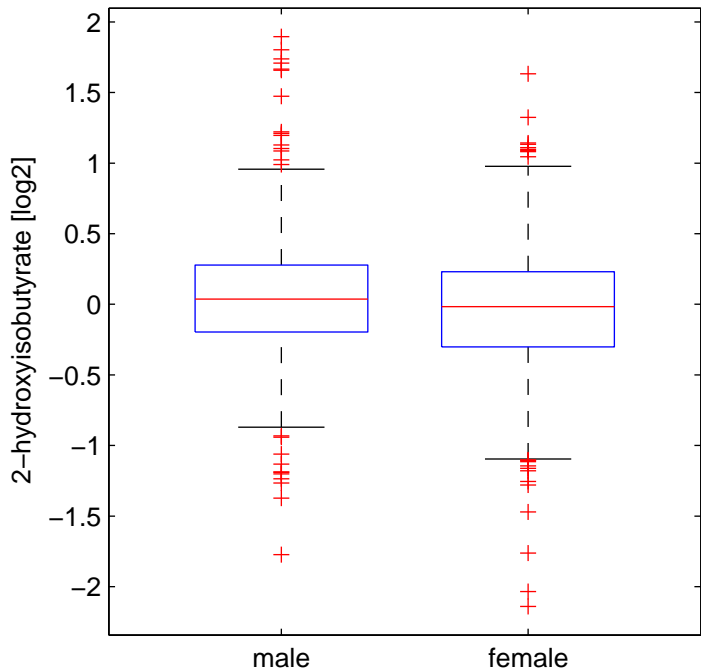

p-val: 6.59e-001

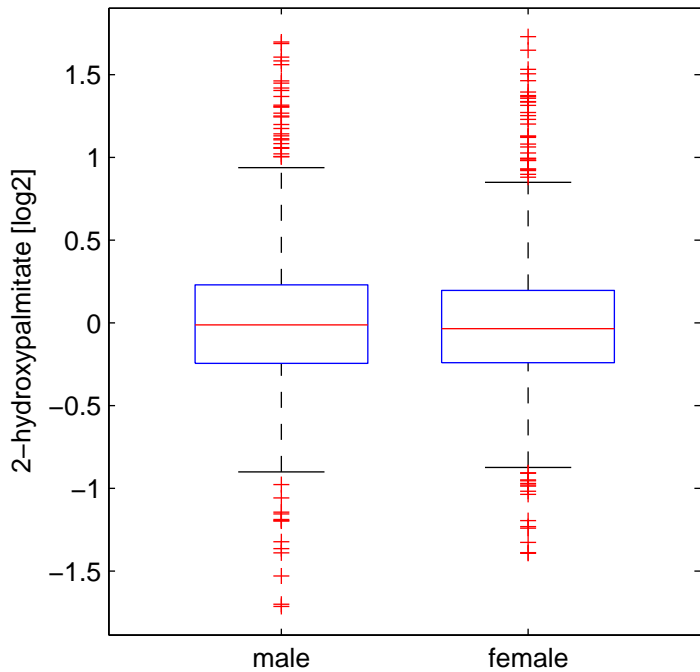



p-val: 1.43e-003

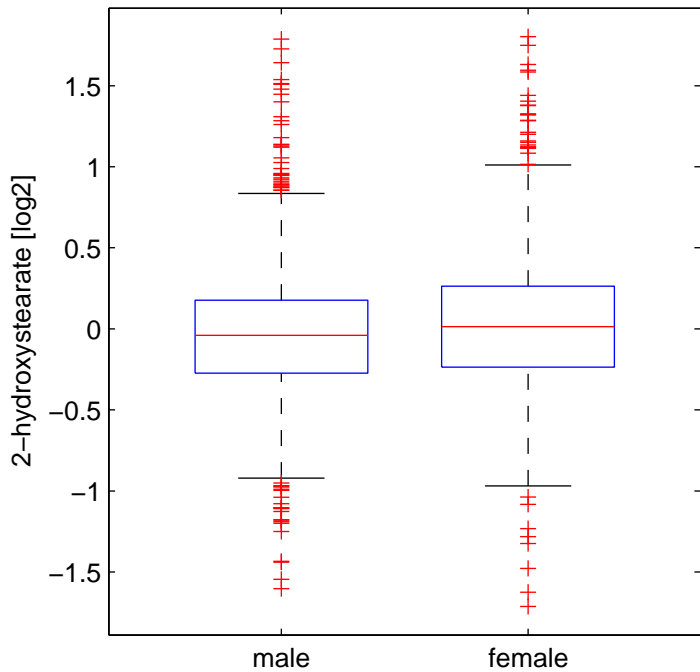

p-val: 7.17e-001

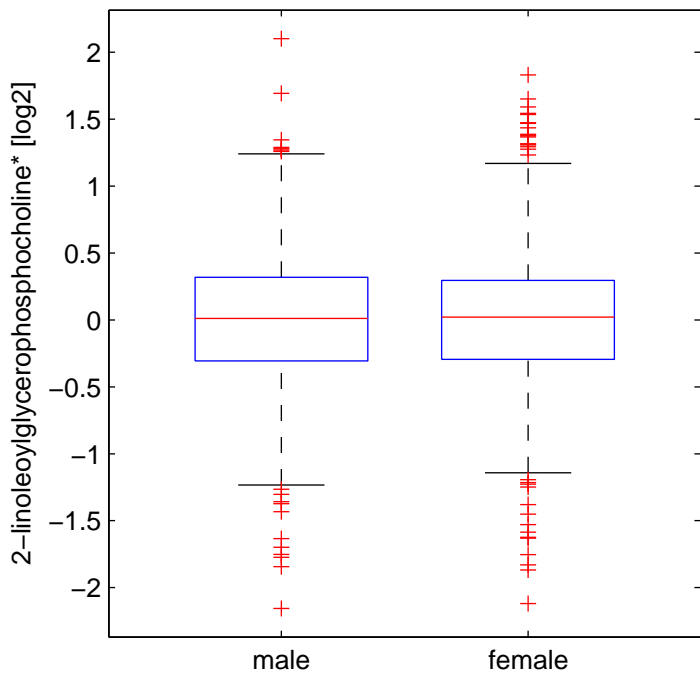

p-val: 8.63e-002

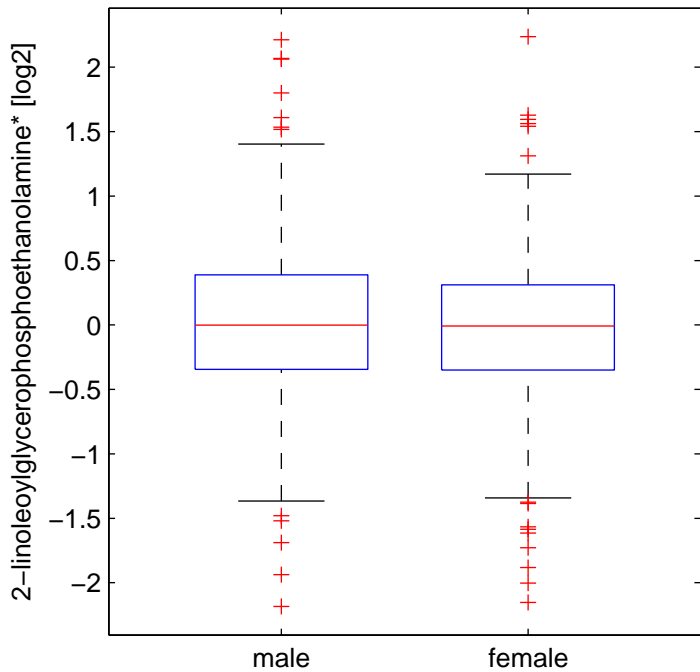

p-val: 6.35e-002

2-methoxyacetaminophen sulfate\* [log2]

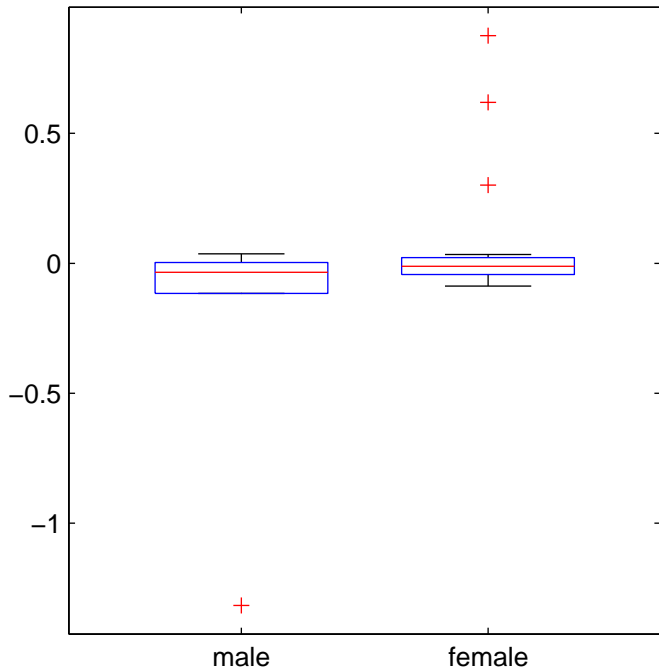

p-val: 2.10e-041

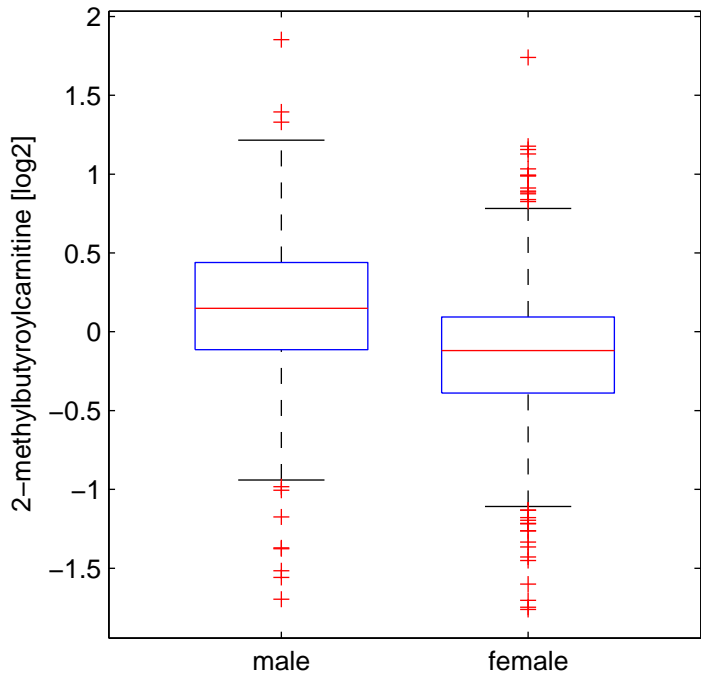

p-val: 6.13e-003

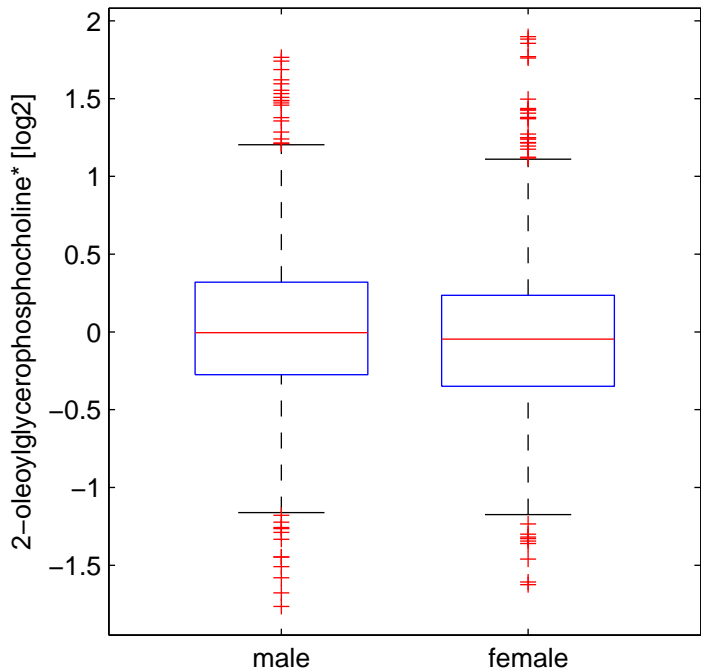

p-val: 4.09e-006

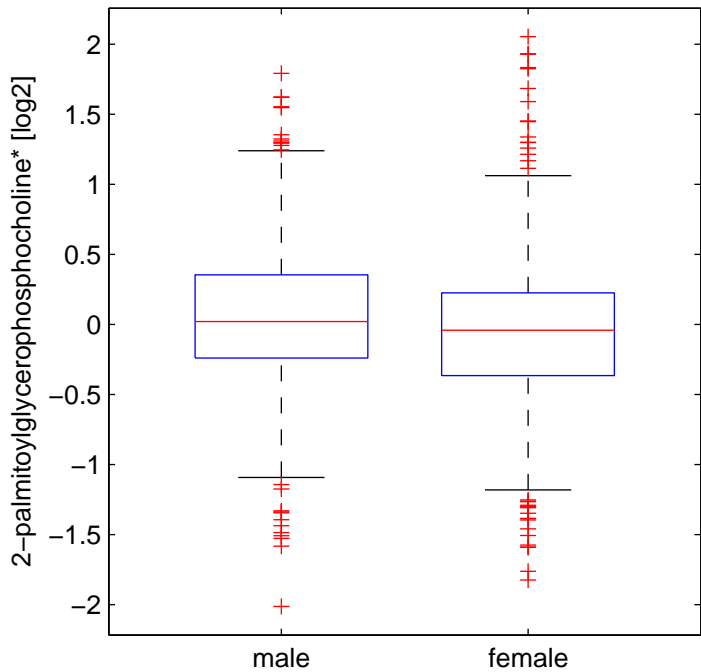

p-val: 7.68e-001

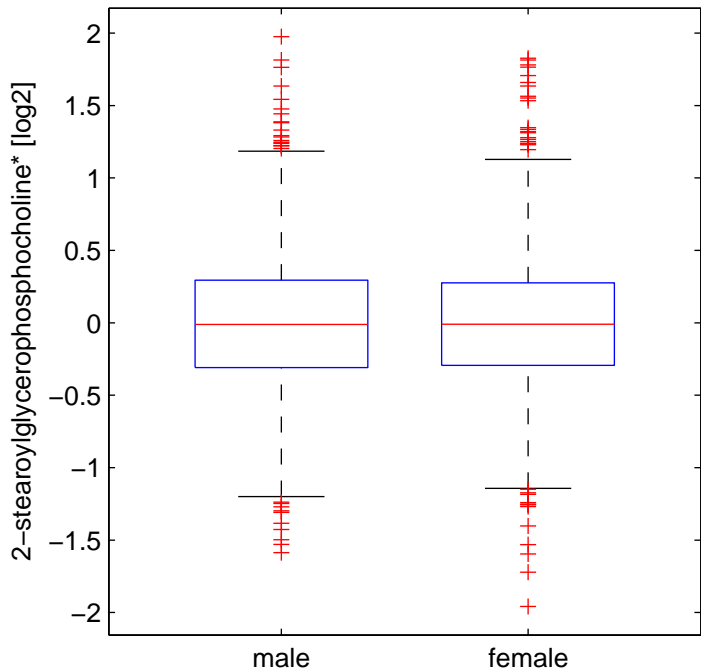



p-val: 9.21e-006

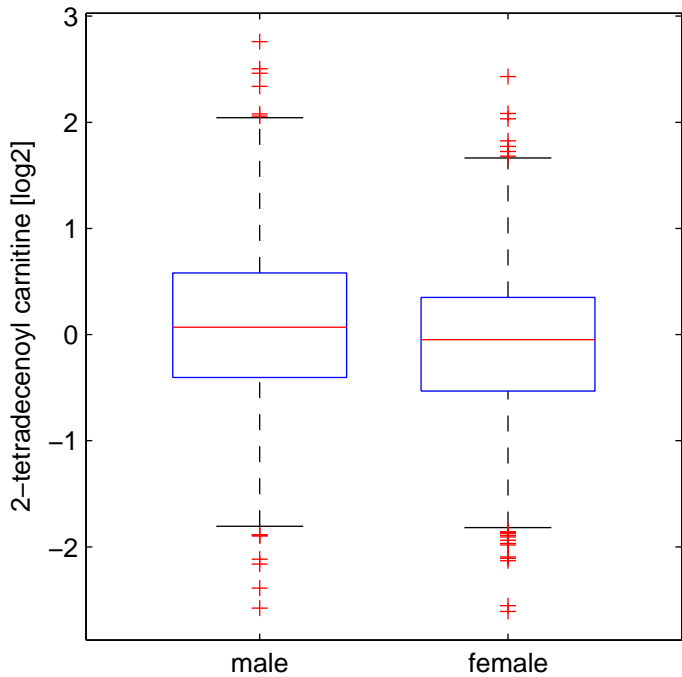

p-val: 1.80e-001

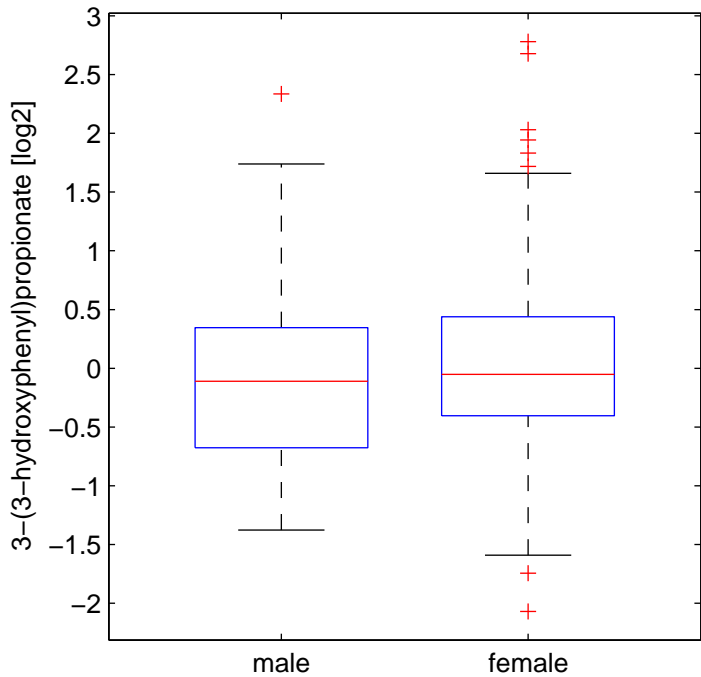

p-val: 2.68e-097

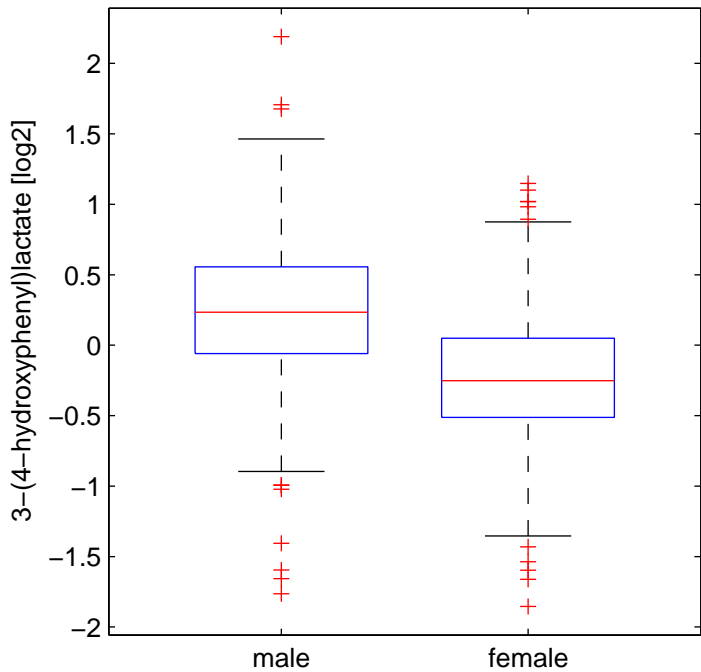

p-val: NaN

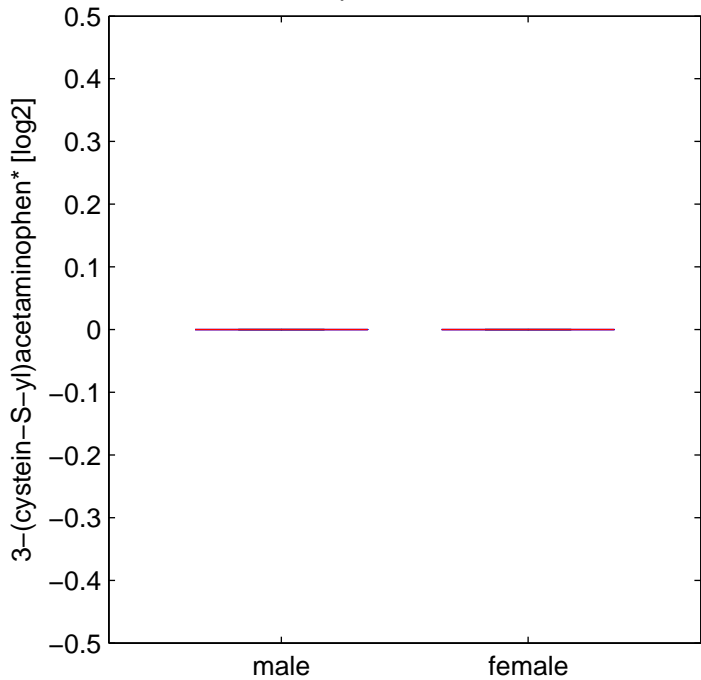

3-carboxy-4-methyl-5-propyl-2-furanpropanoate [log2]

p-val: 3.32e-010

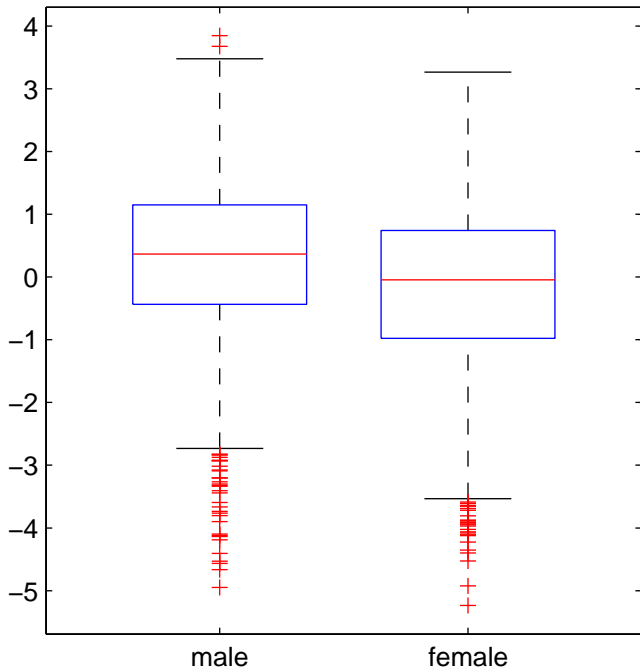

p-val: 1.07e-011

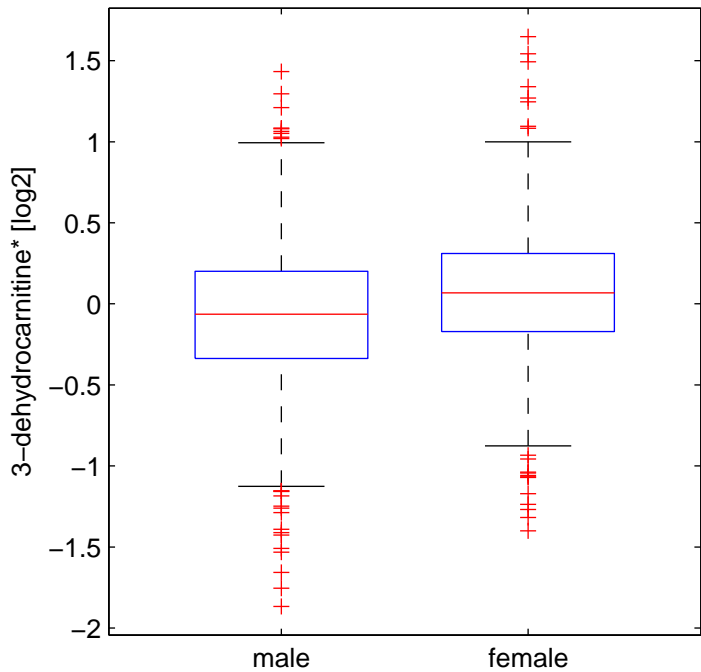

p-val: 9.70e-001

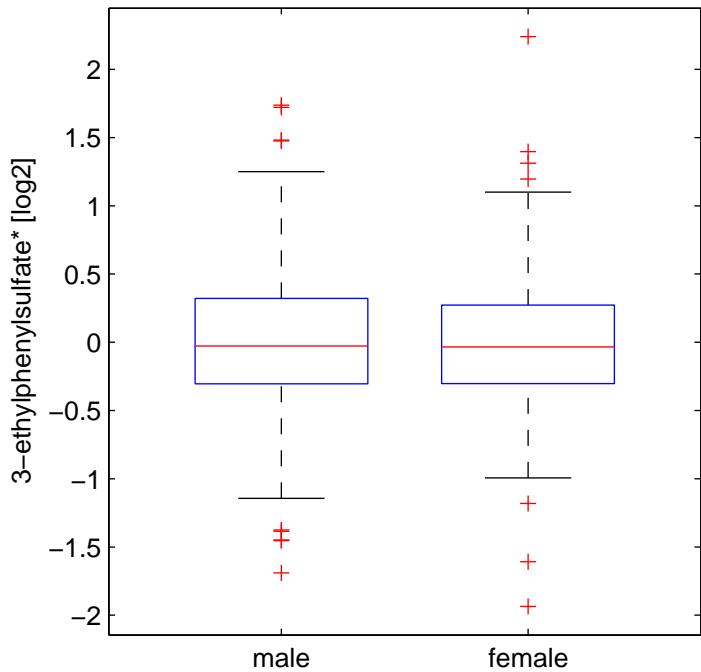

p-val: 8.78e-005

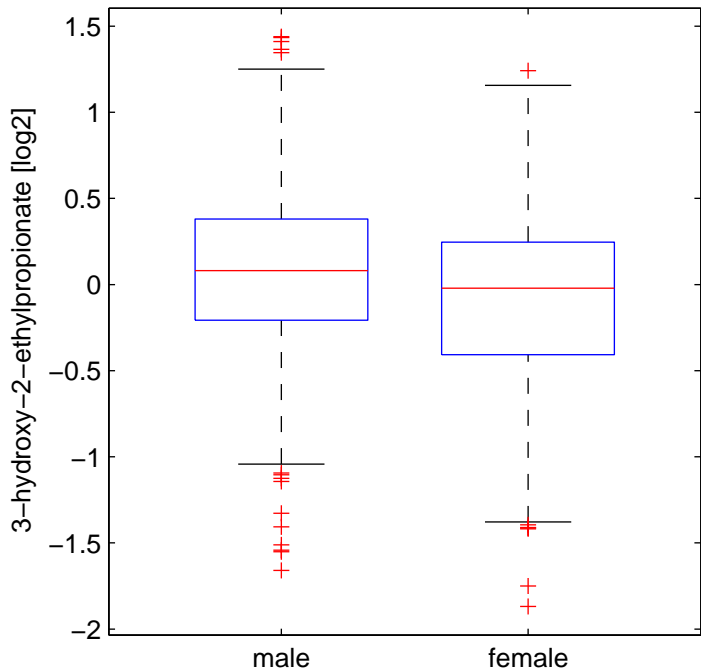



p-val: 8.31e-003

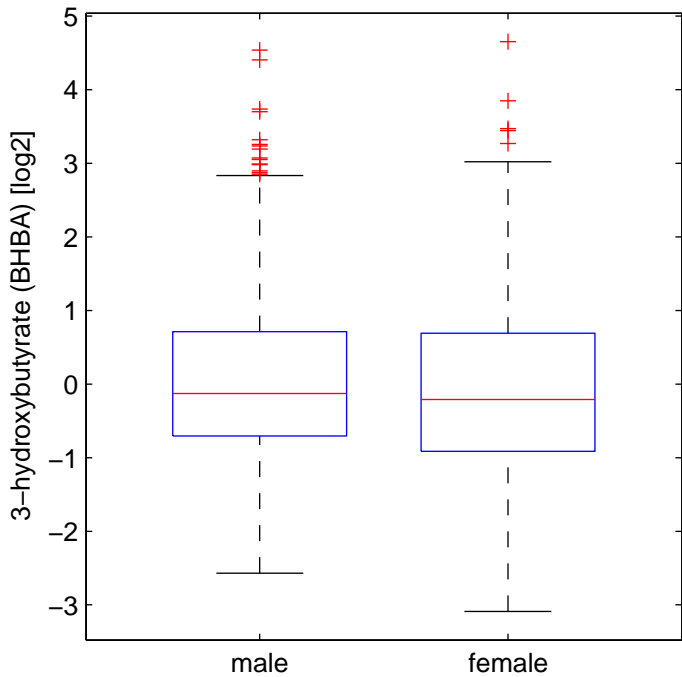

p-val: 4.23e-009

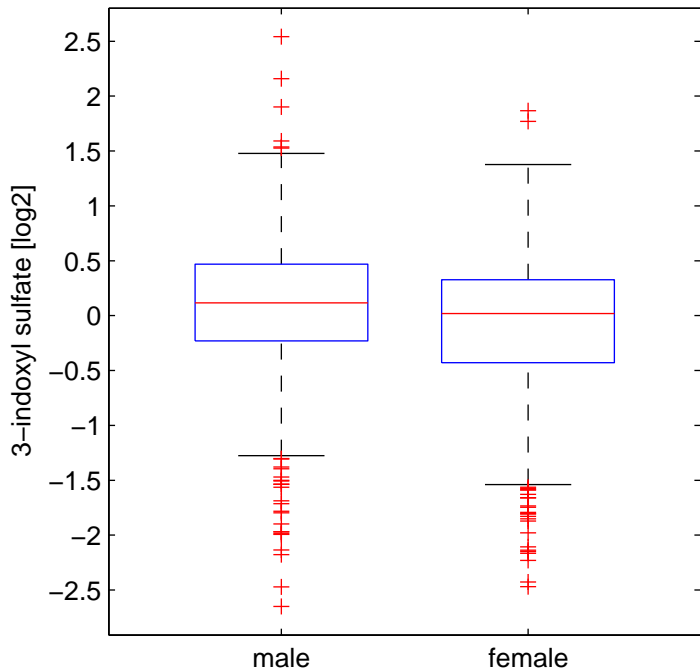

p-val: 1.11e-002

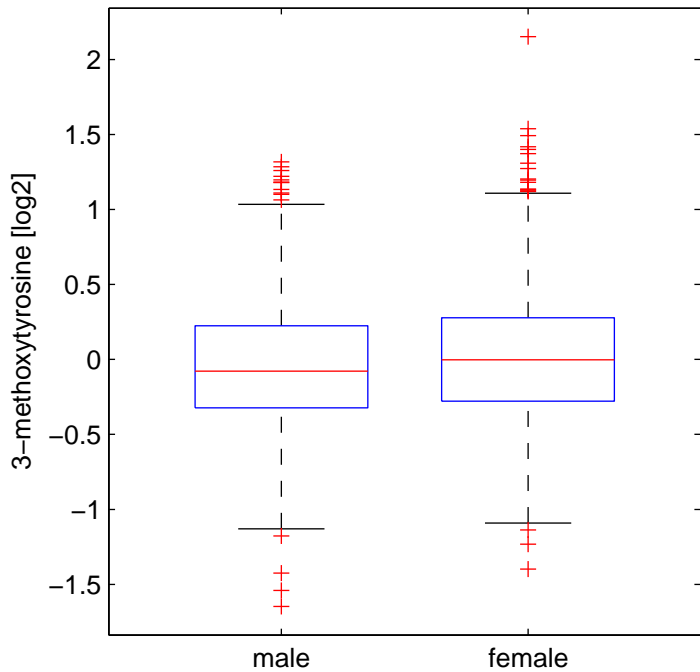

p-val: 1.41e-032

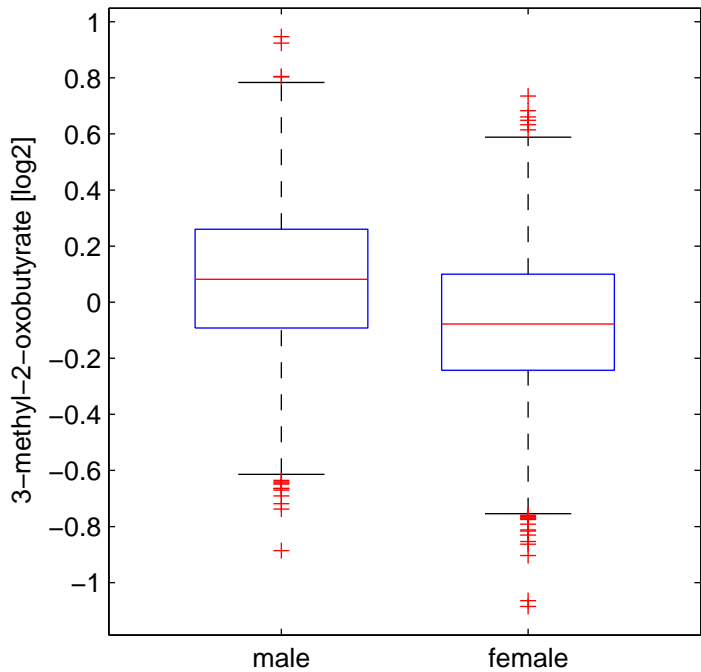

p-val: 1.04e-117

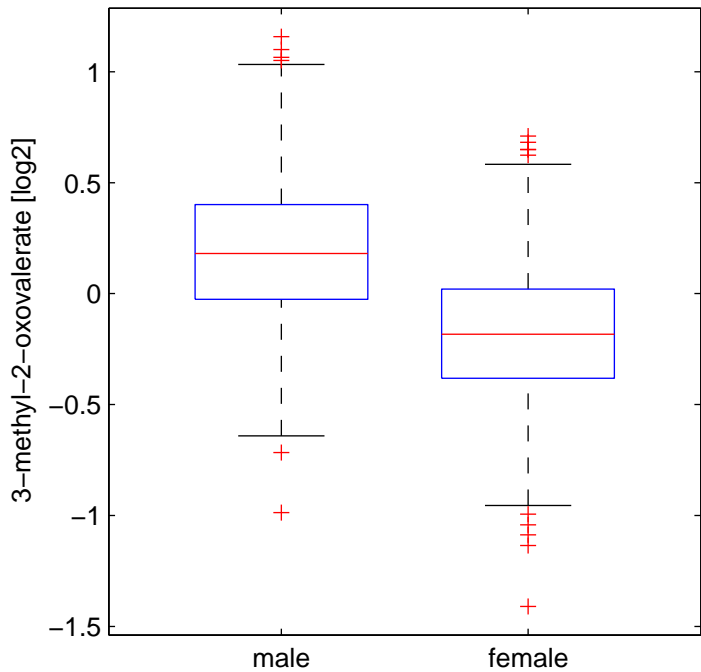

p-val: 1.86e-001

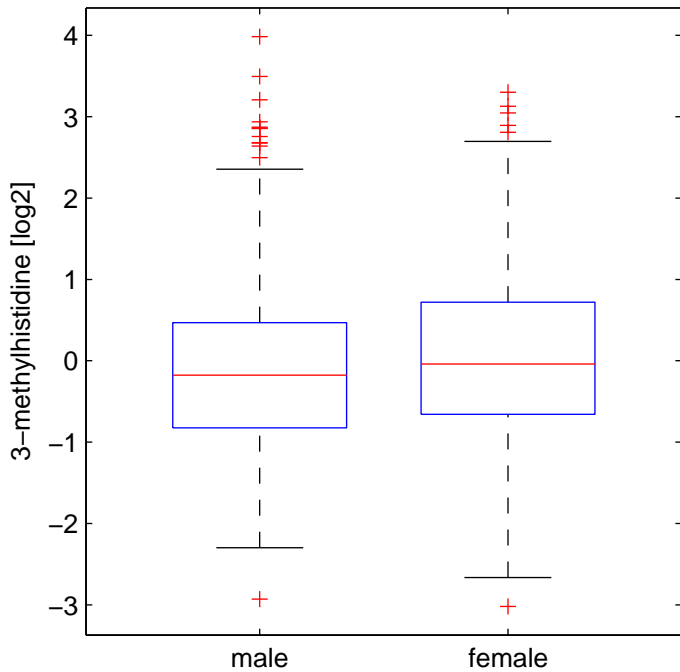

p-val: 8.20e-001

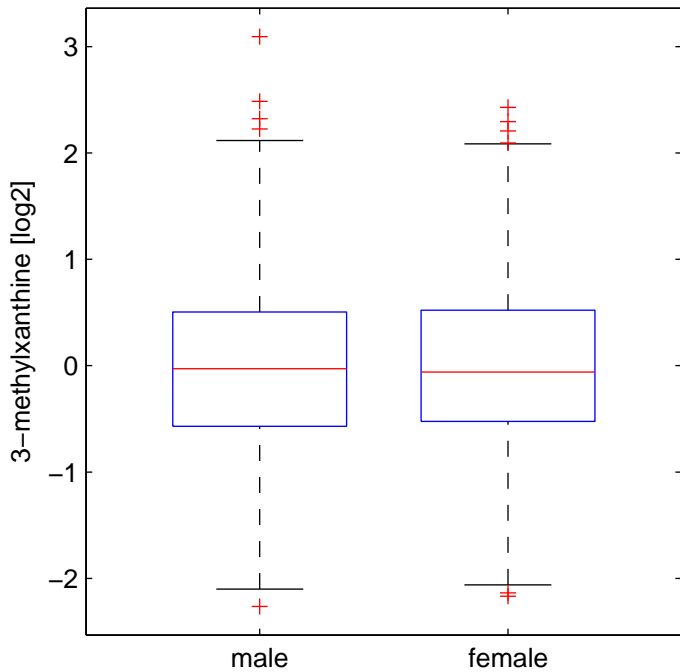

p-val: 4.99e-001

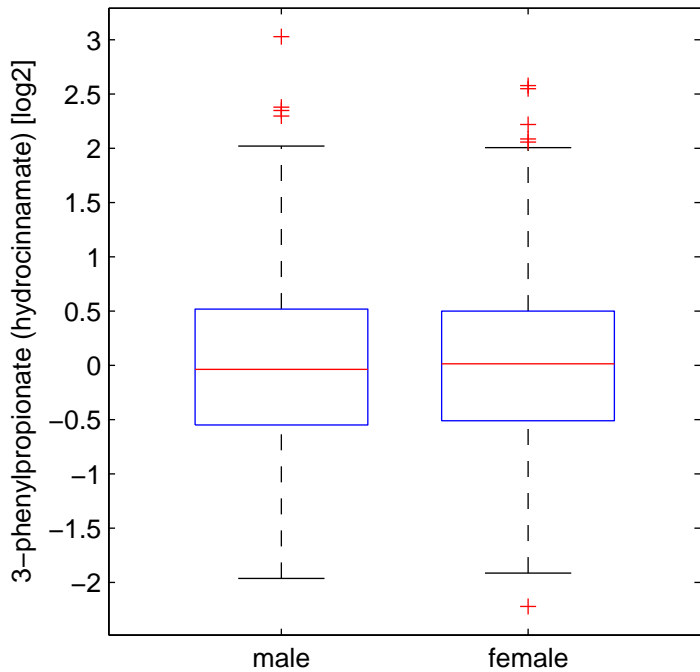



p-val: 1.55e-001

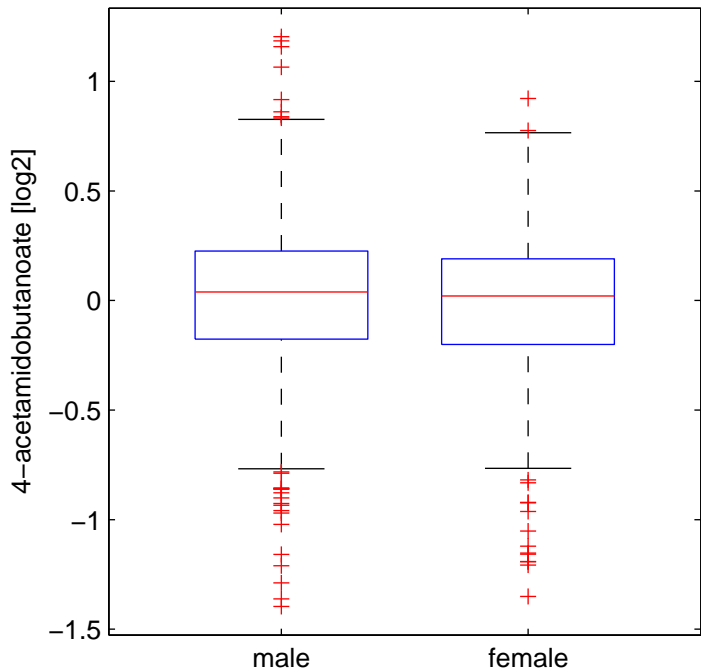

p-val: 3.86e-001

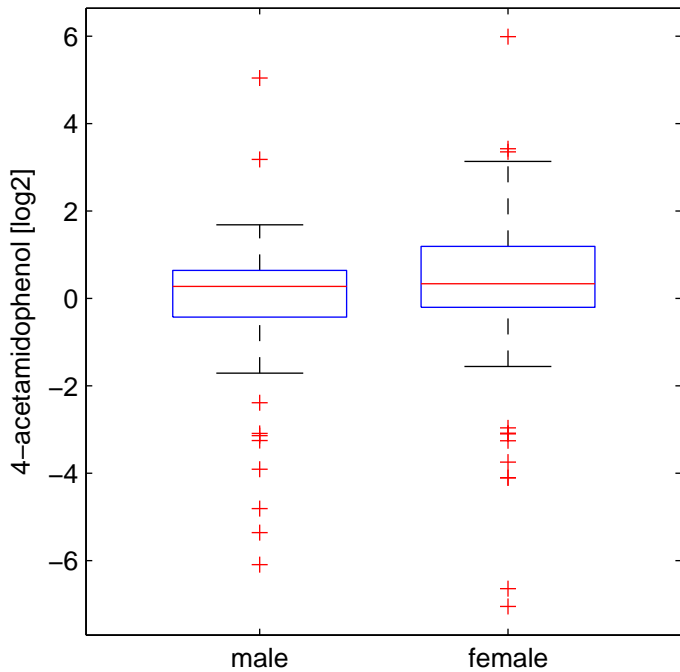

p-val: 3.29e-001

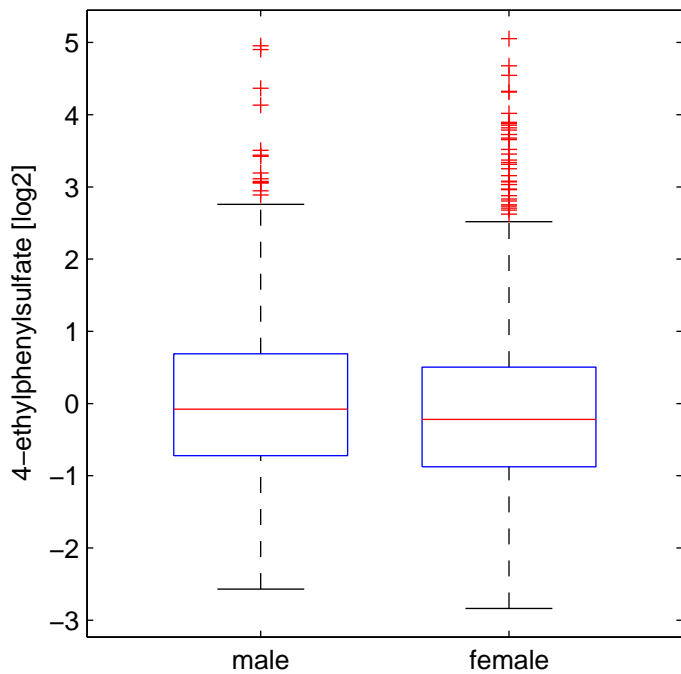

p-val: 9.95e-003

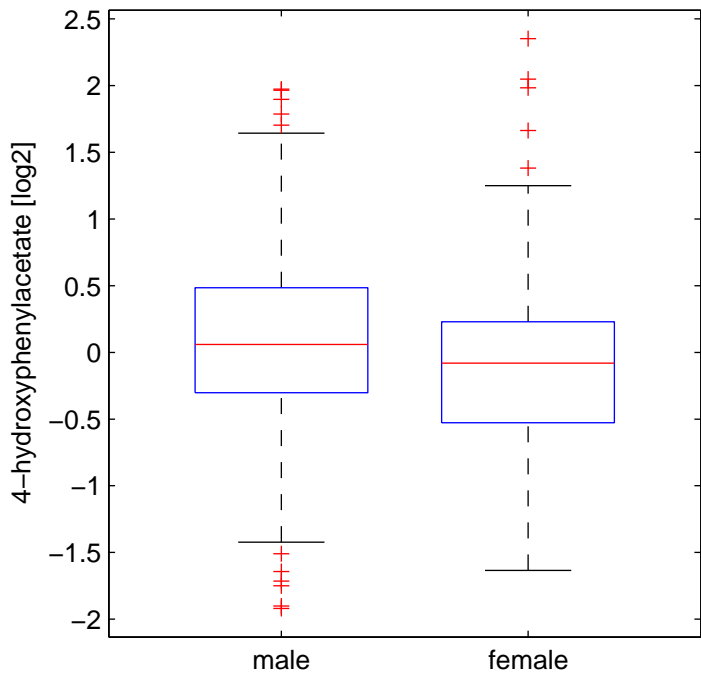

p-val: 3.21e-102

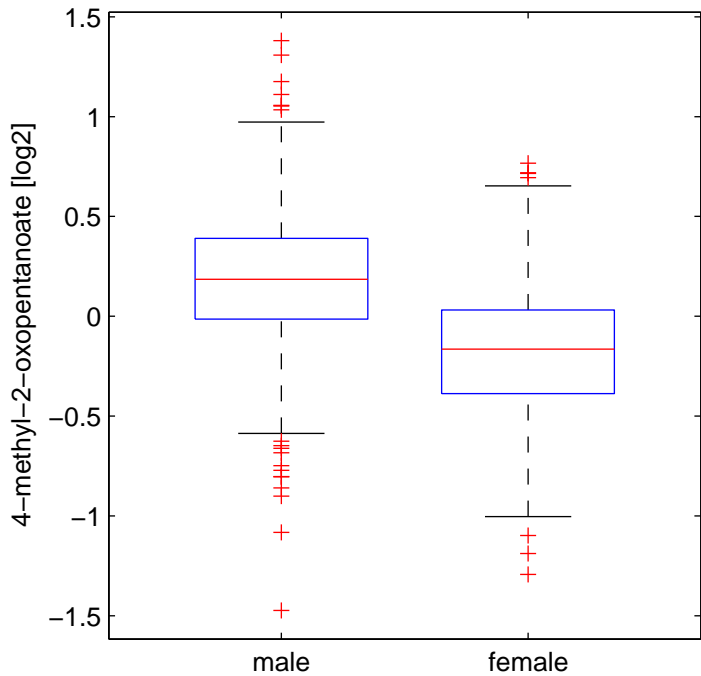

p-val: 6.43e-035

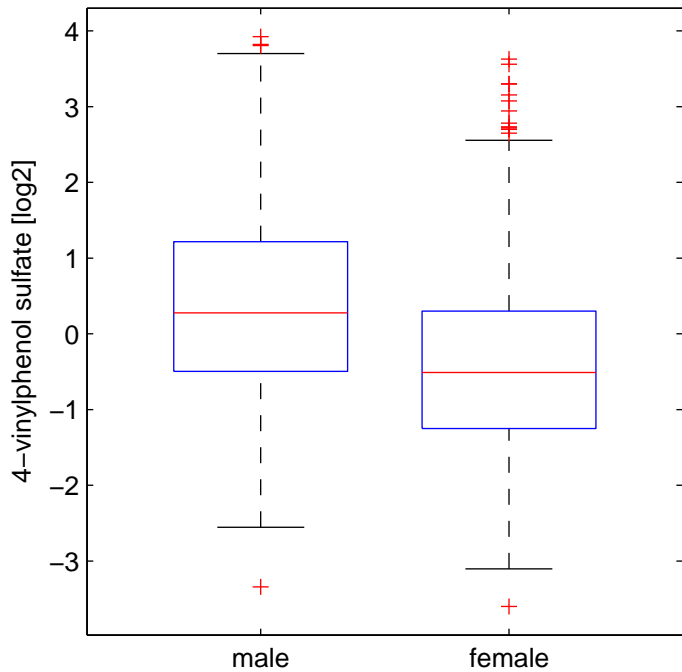

p-val: 1.13e-028

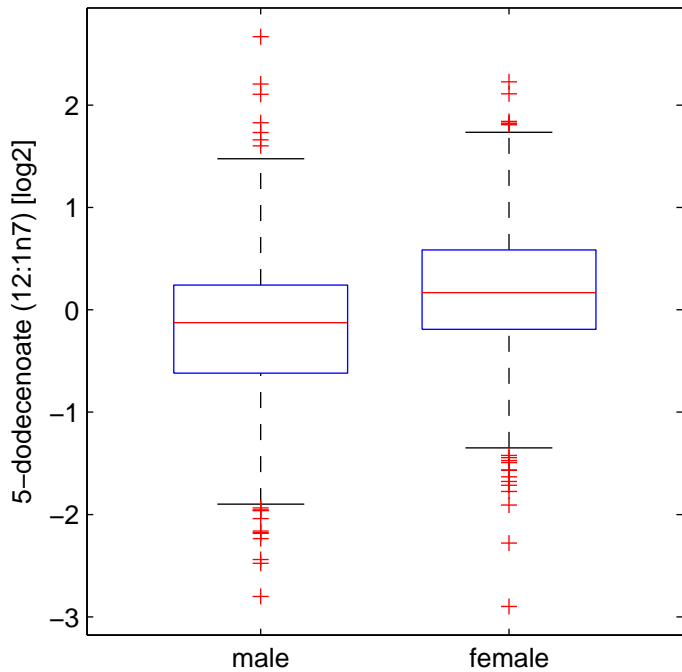

p-val: 1.48e-013

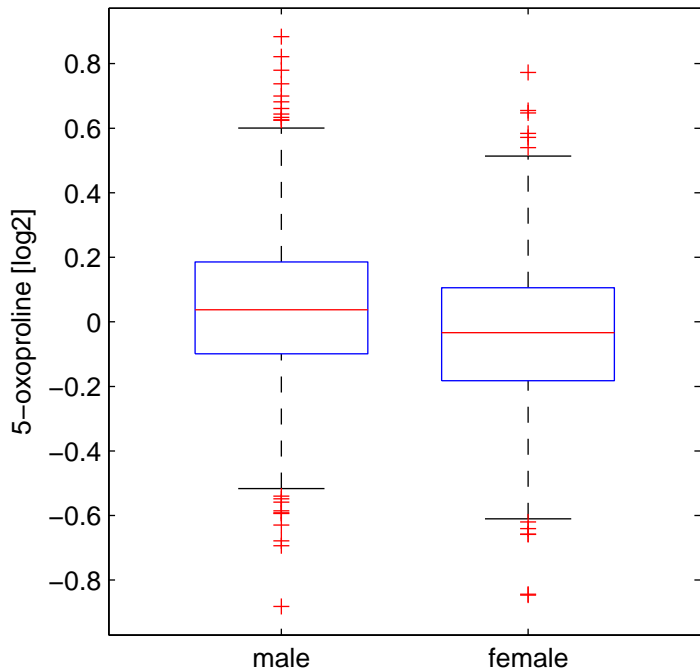



7- $\alpha$ -hydroxy-3-oxo-4-cholestenoate (7-Hoca) [log2]

p-val: 1.56e-009

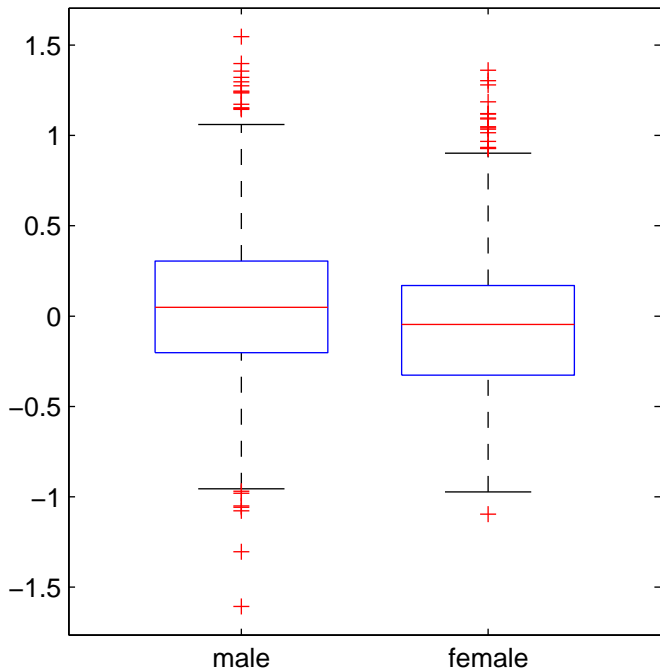

p-val: 8.09e-004

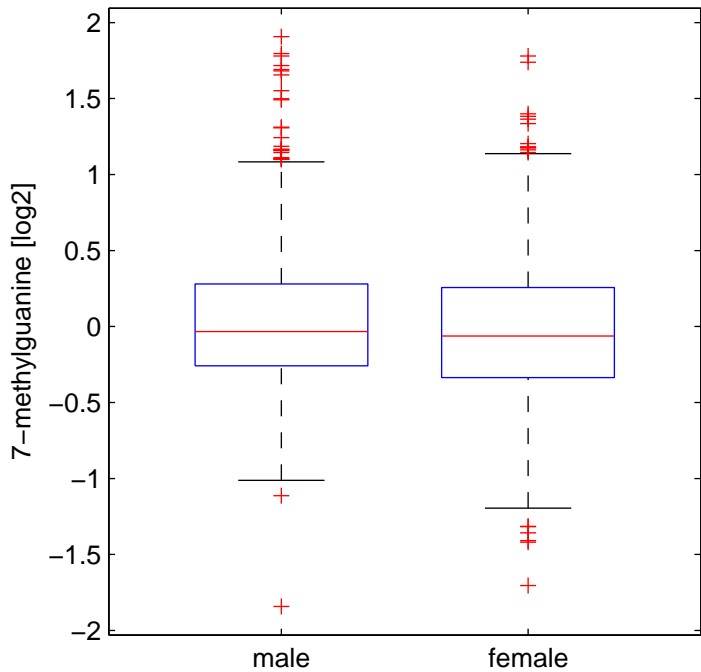

p-val: 3.32e-001

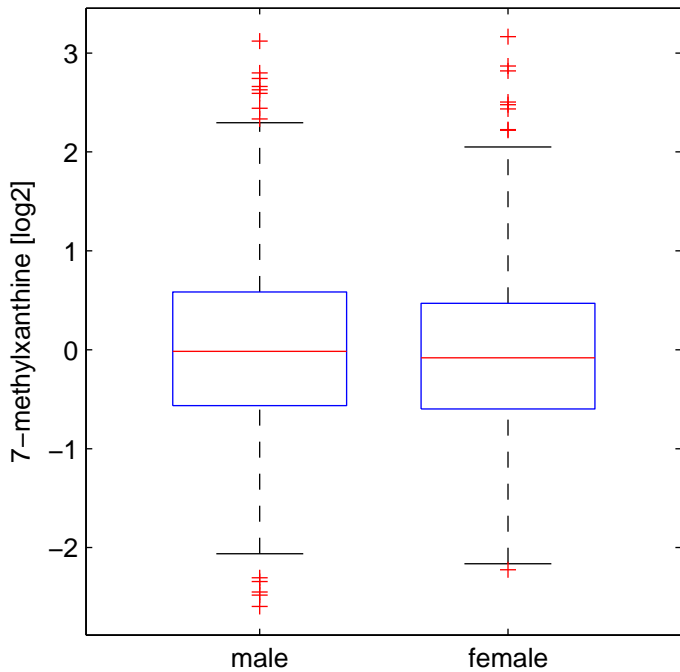

p-val: 1.32e-001

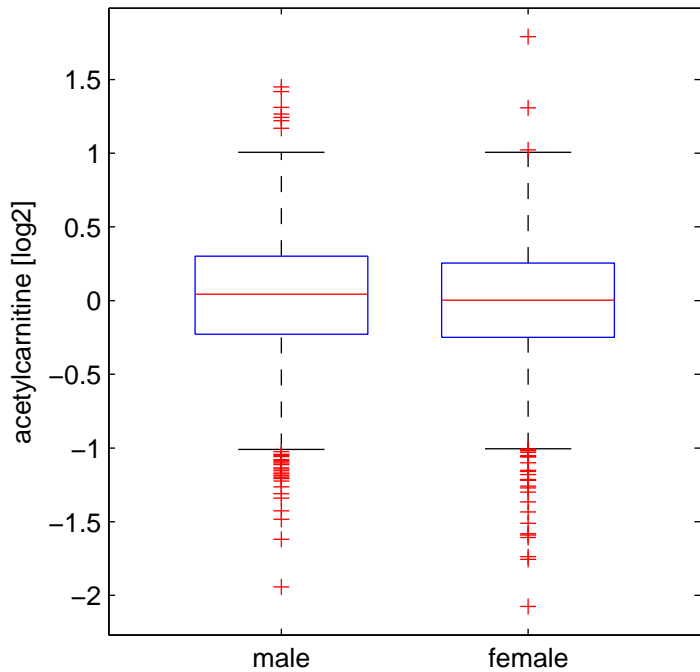

p-val: 2.38e-023

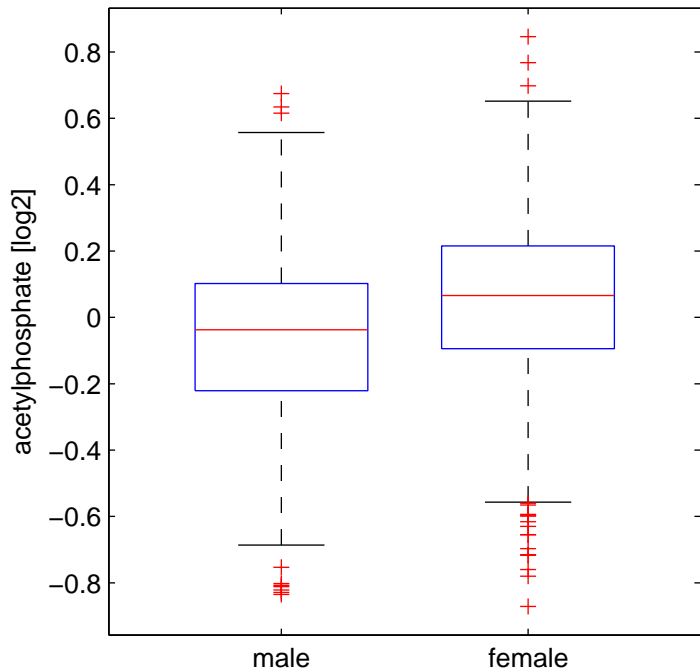

p-val: 4.65e-001

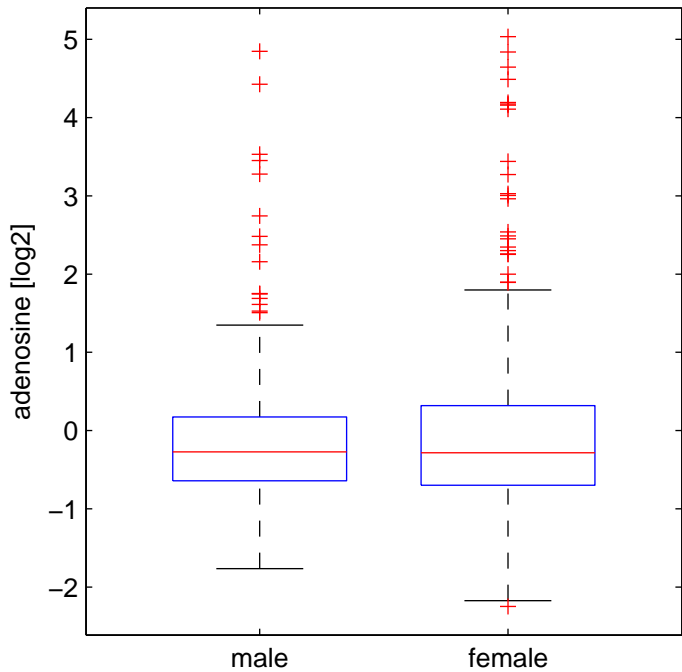

p-val: 1.66e-007

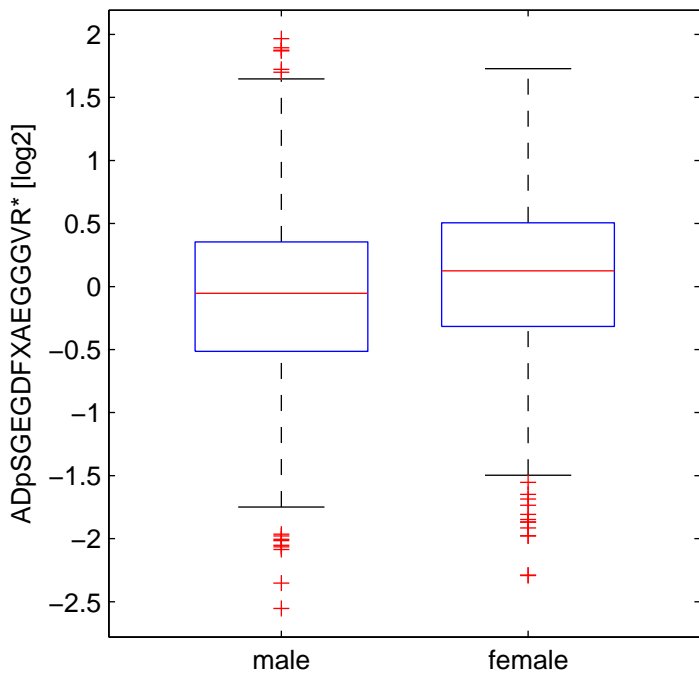

p-val: 8.74e-001

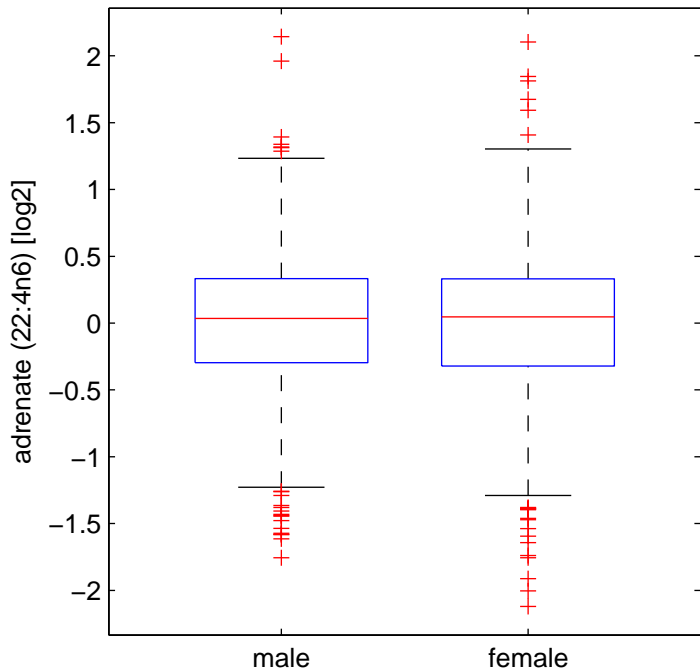



p-val: 1.31e-002

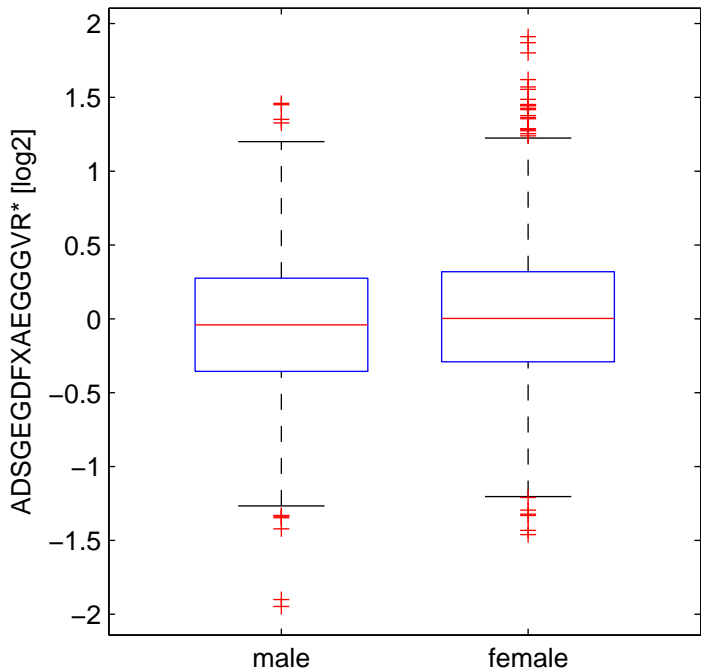

p-val: 1.88e-001

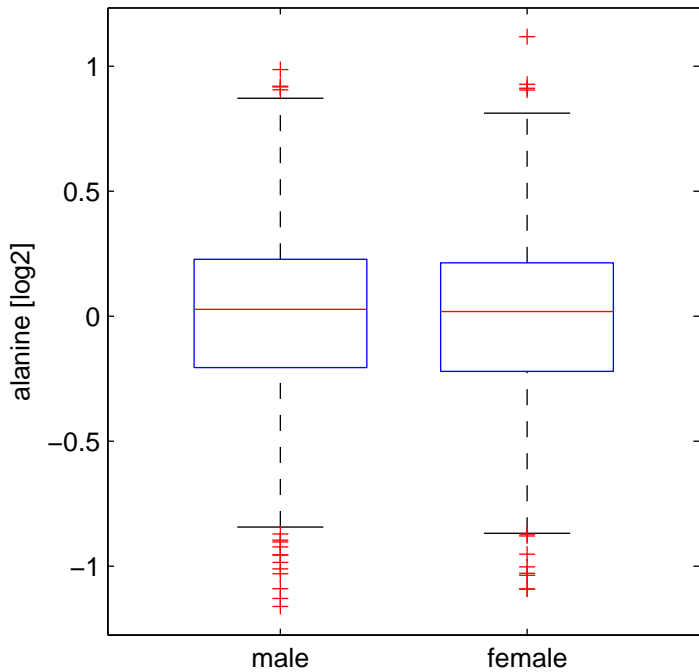

p-val: 6.84e-008

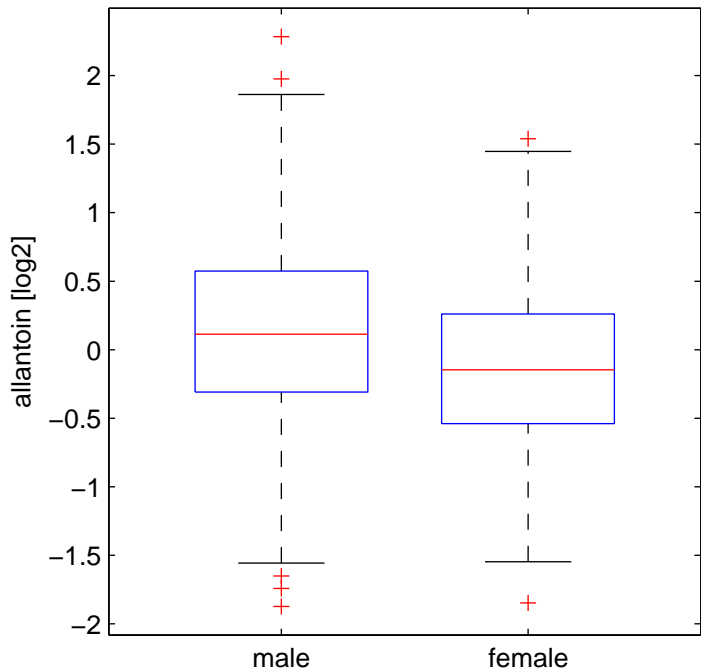

p-val: 4.78e-075

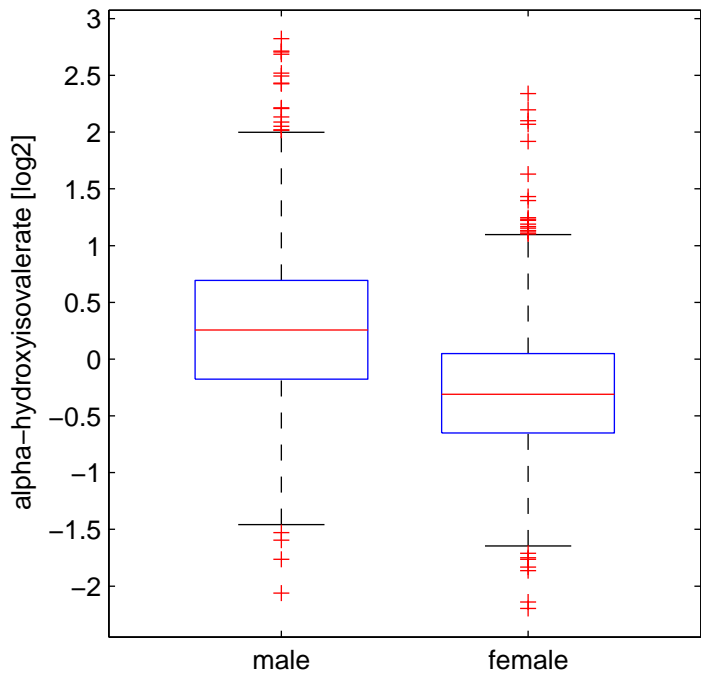

p-val: 2.34e-003

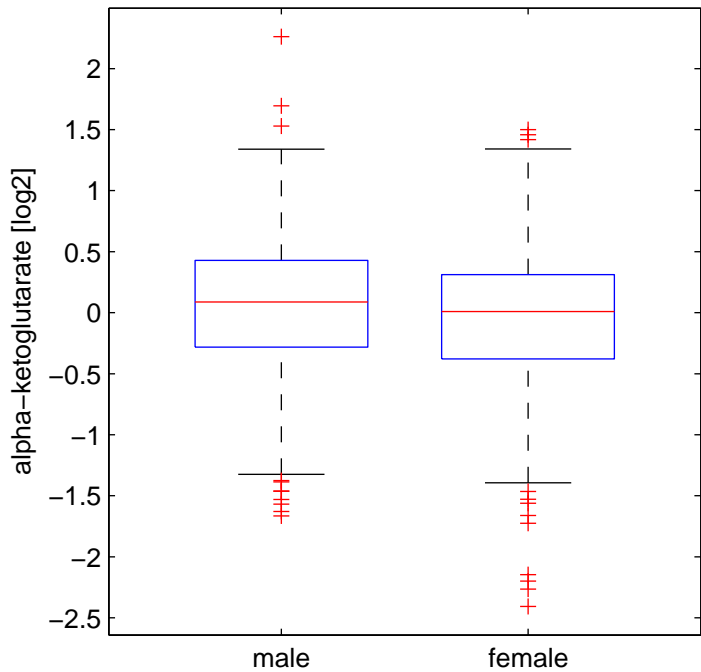

p-val: 1.28e-004

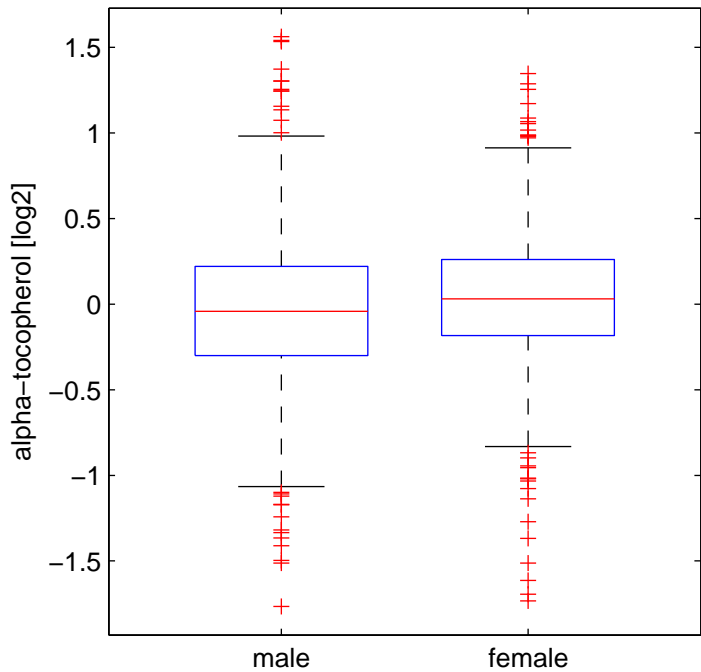

p-val: 2.41e-021

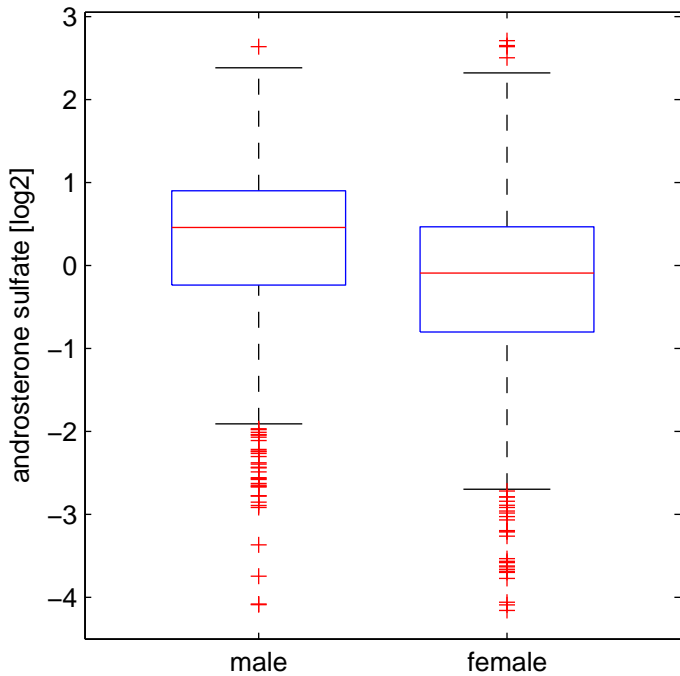

p-val: 1.96e-002

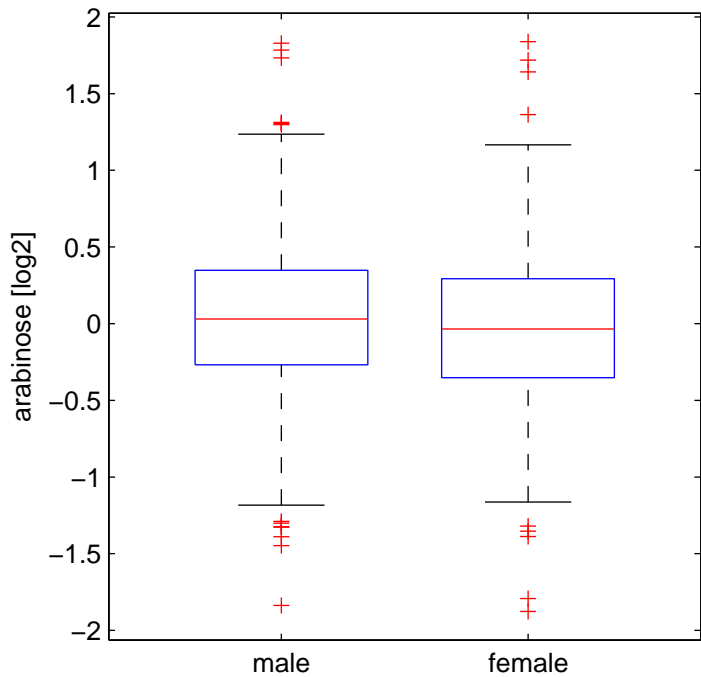



p-val: 8.33e-011

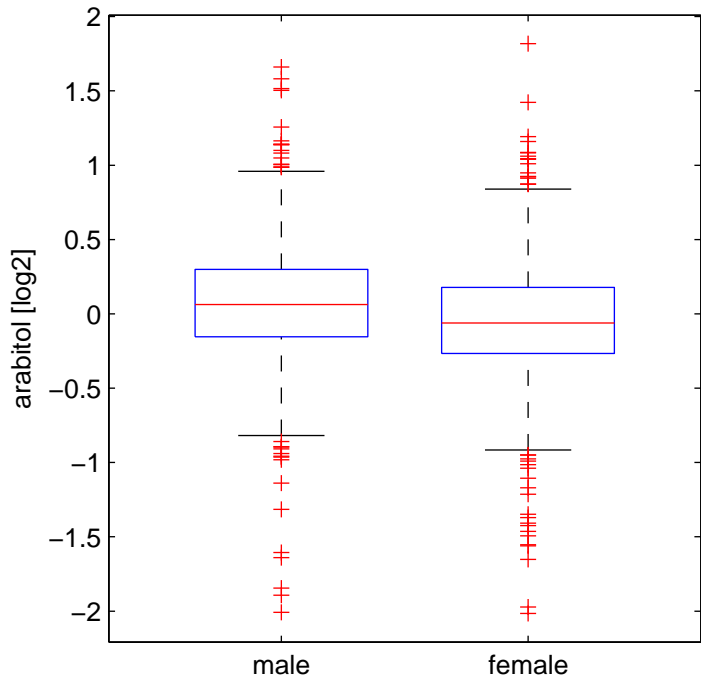

p-val: 1.49e-001

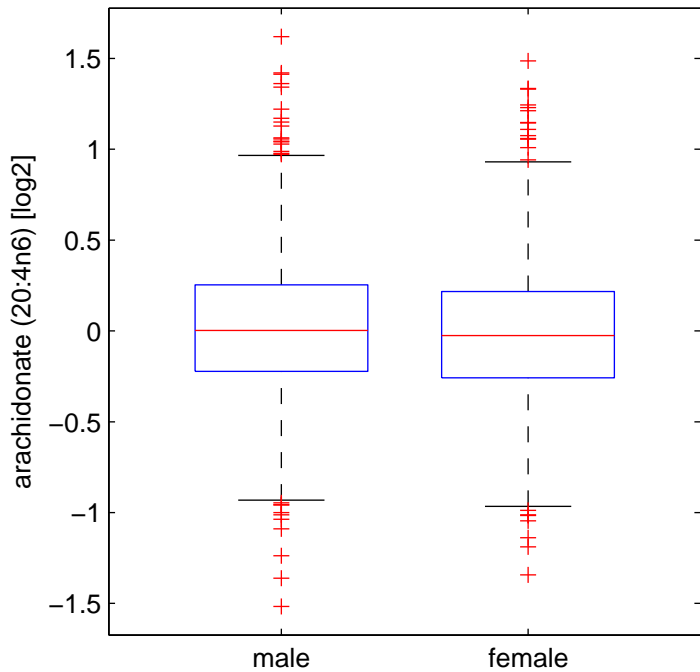

p-val: 4.92e-002

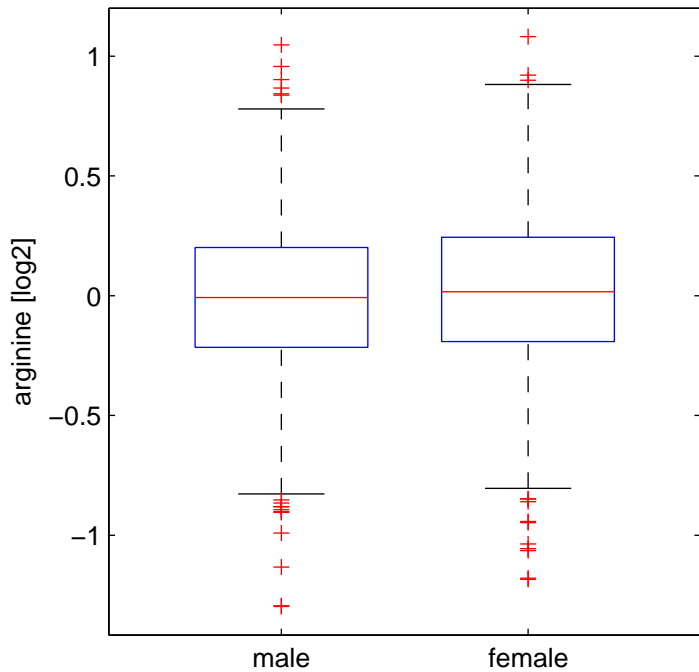

p-val: 3.39e-008

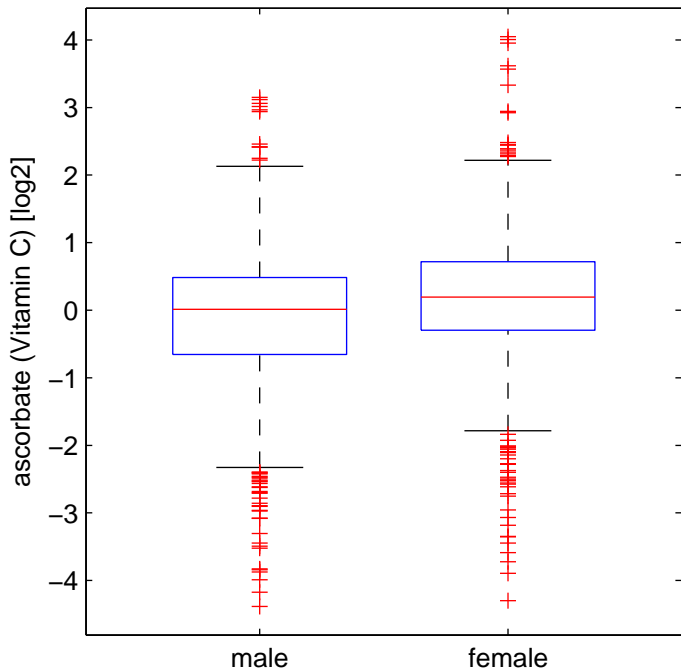

p-val: 4.13e-004

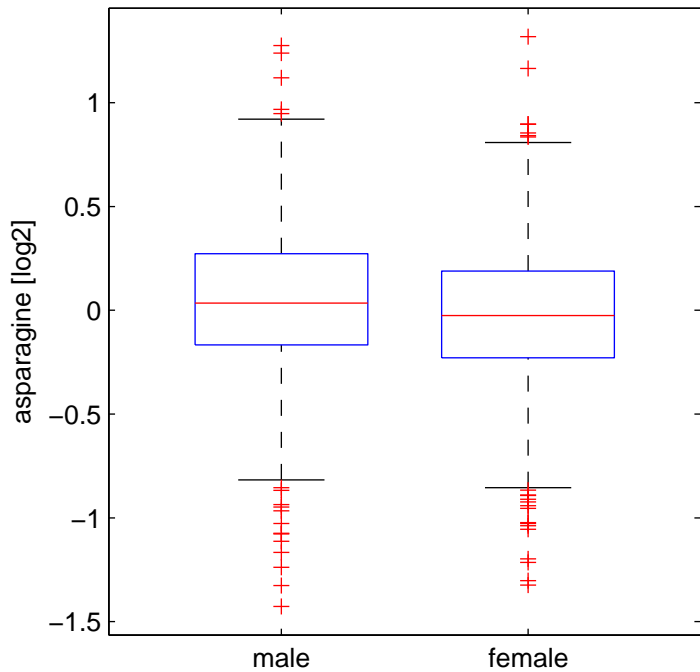

p-val: 7.33e-001

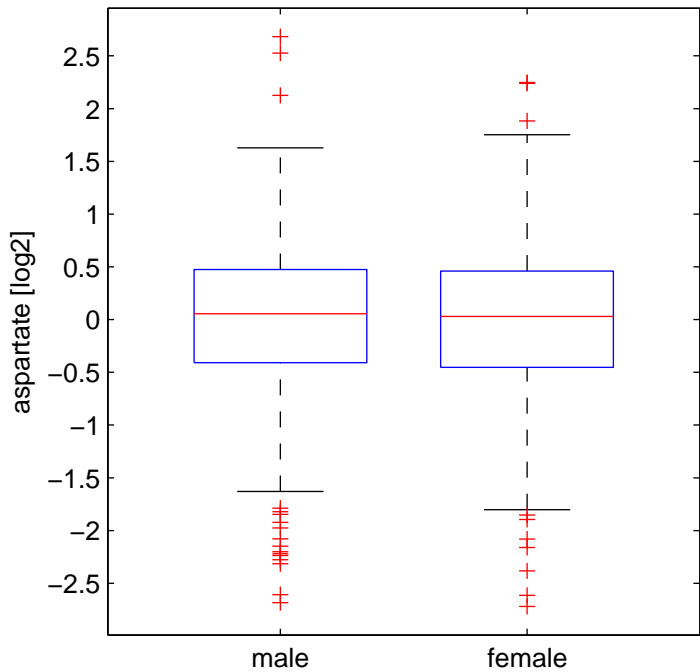

p-val: 2.44e-001

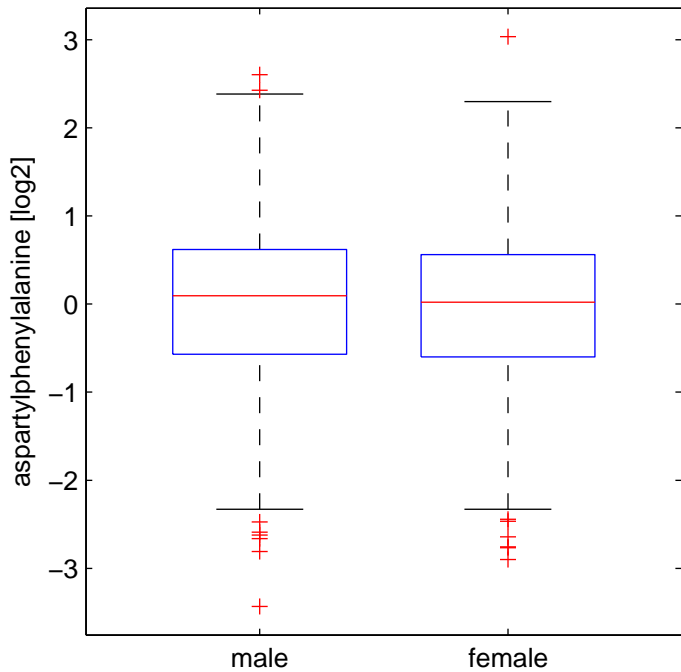

p-val: 8.69e-003

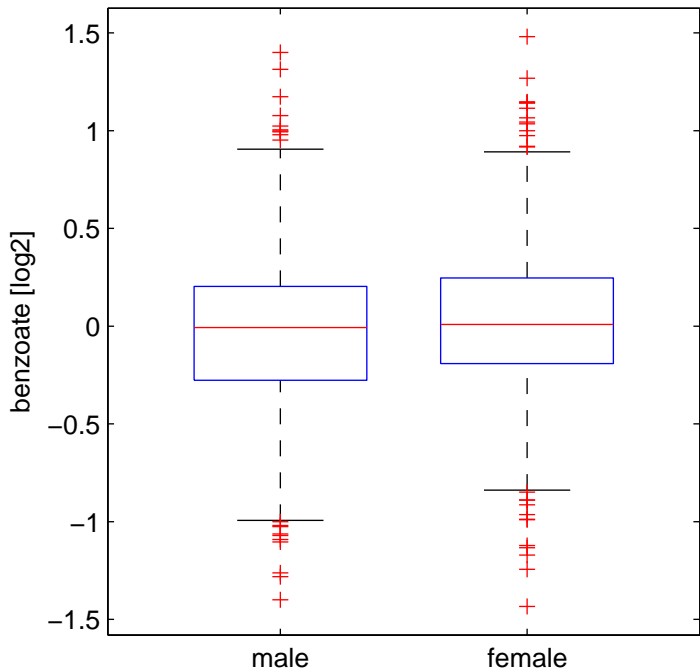



p-val: 1.41e-020

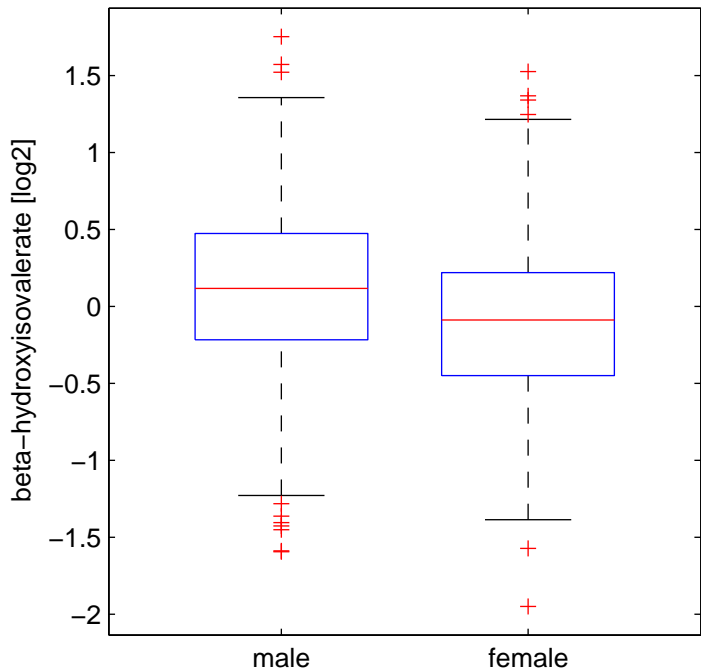

p-val: 2.50e-032

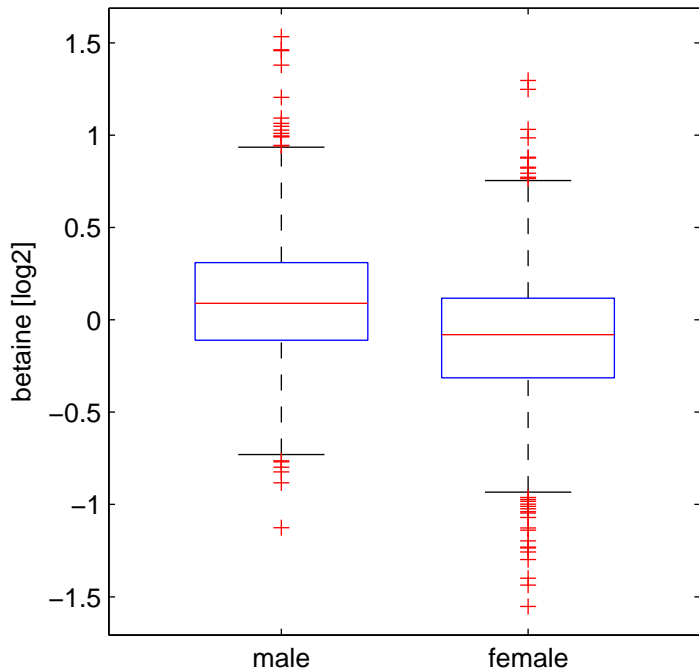

p-val: 1.31e-006

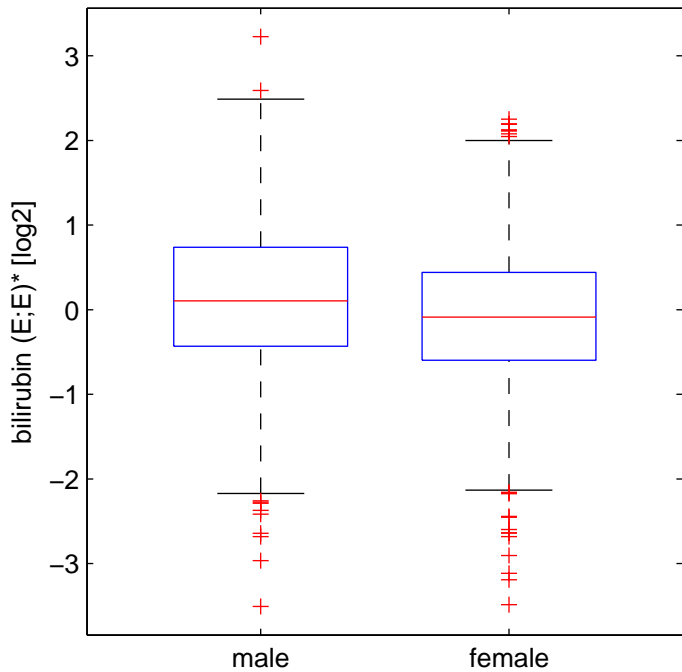

p-val: 8.68e-001

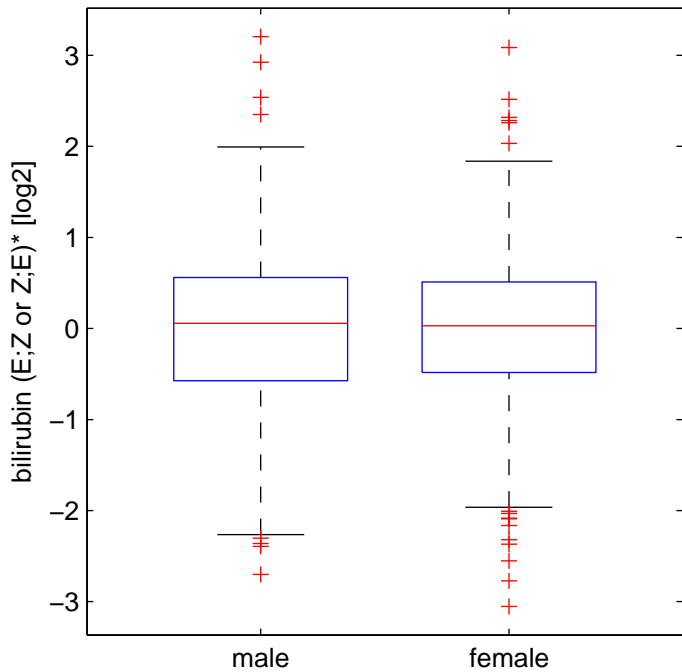

p-val: 2.61e-007

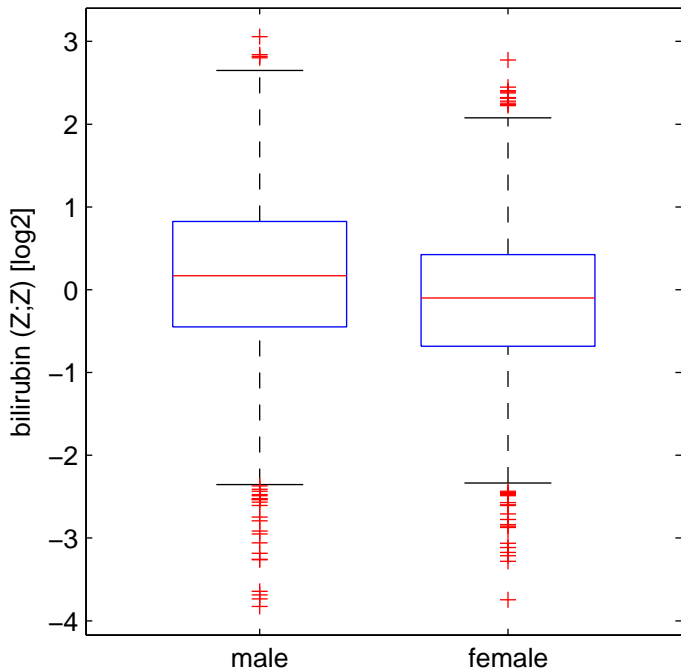

p-val: 1.08e-008

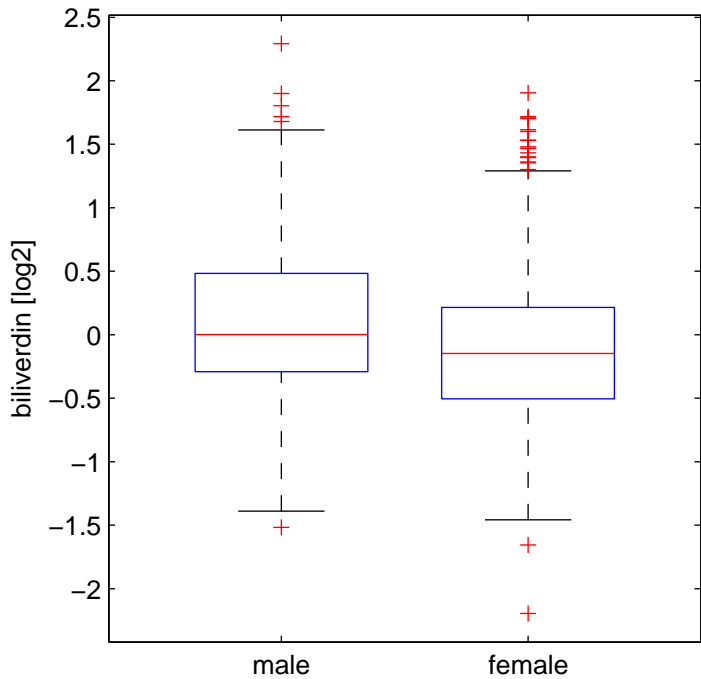

p-val: 3.86e-001

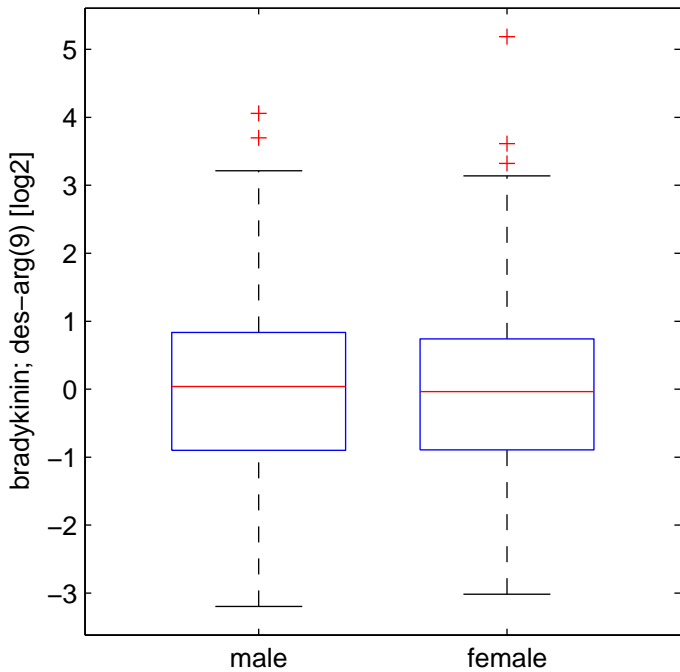

p-val: 8.50e-006

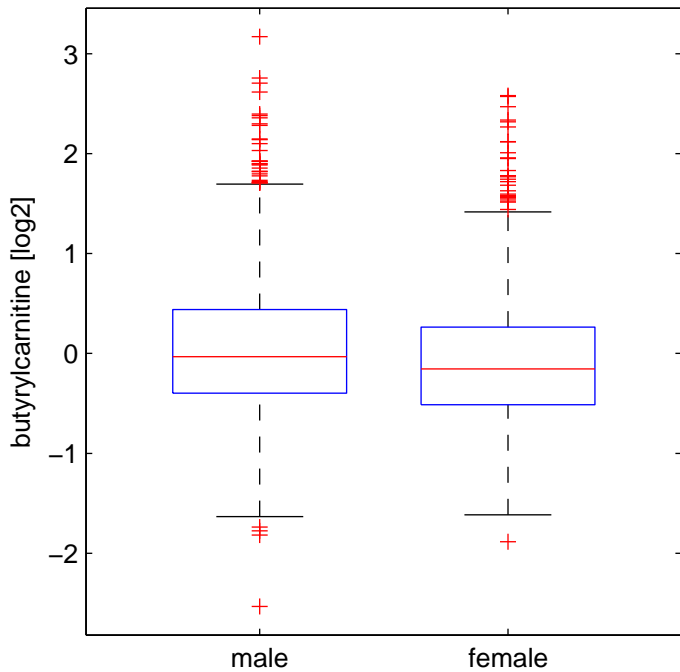



p-val: 1.47e-003

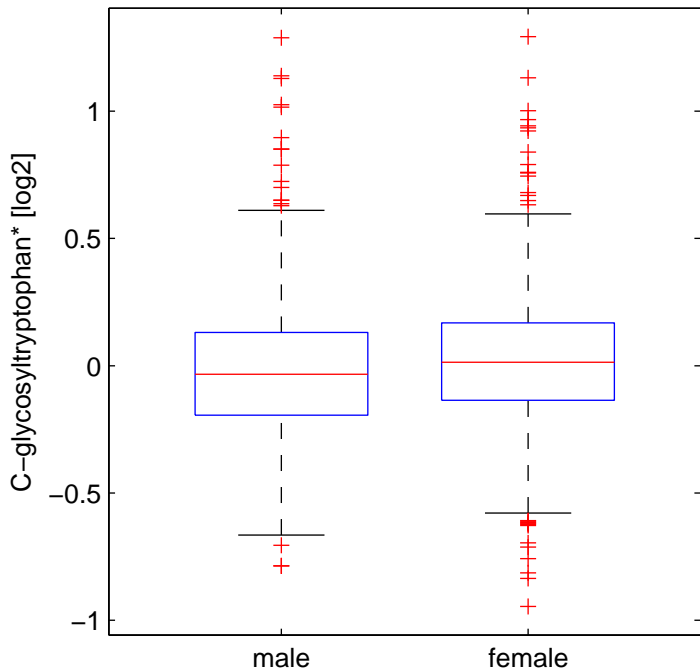

p-val: 1.94e-002

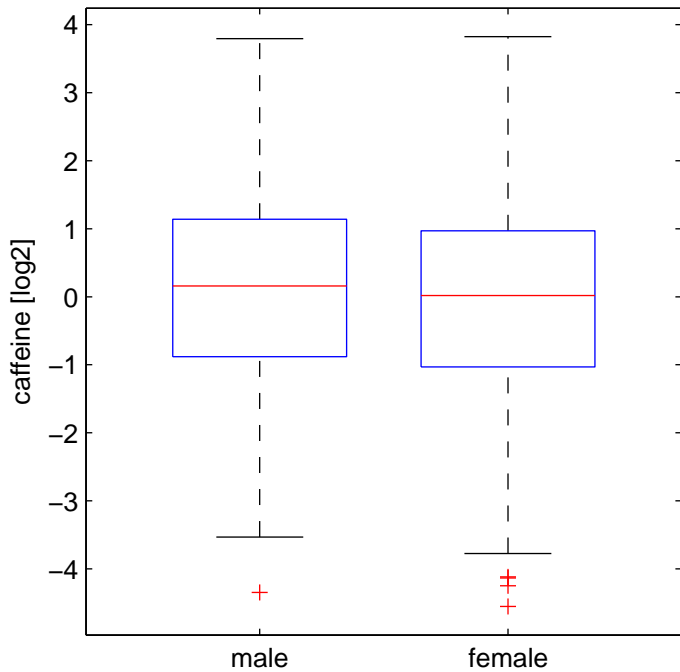

p-val: 3.93e-008

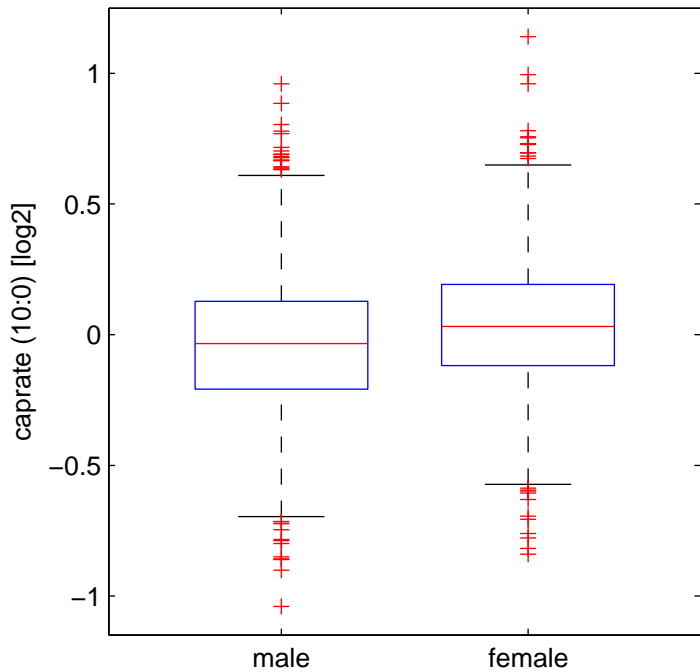

p-val: 1.31e-004

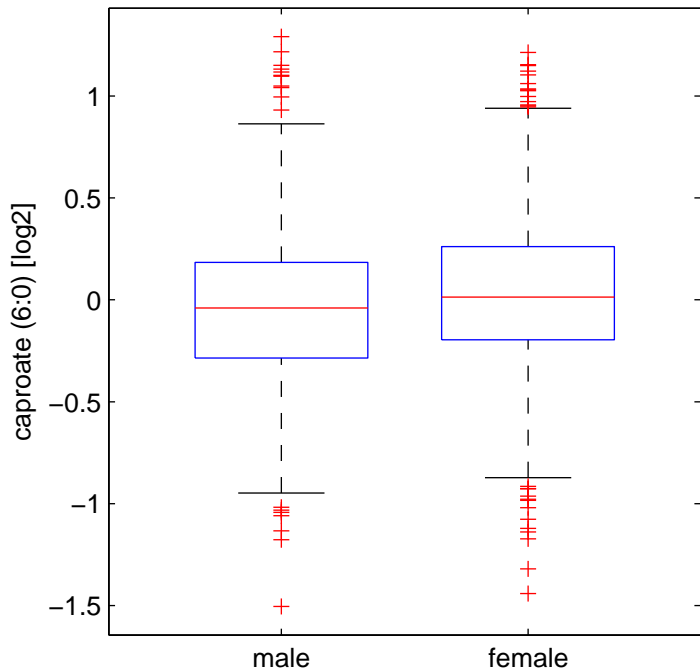

p-val: 3.99e-004

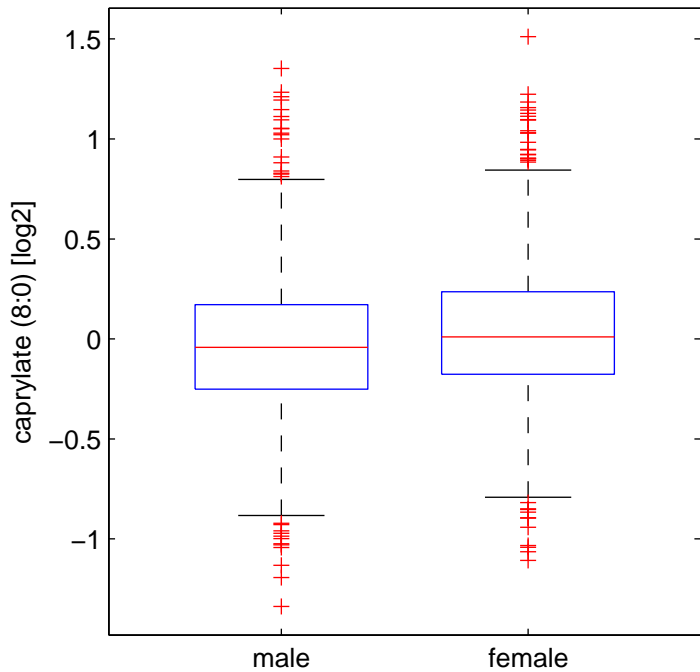

p-val: 1.91e-001

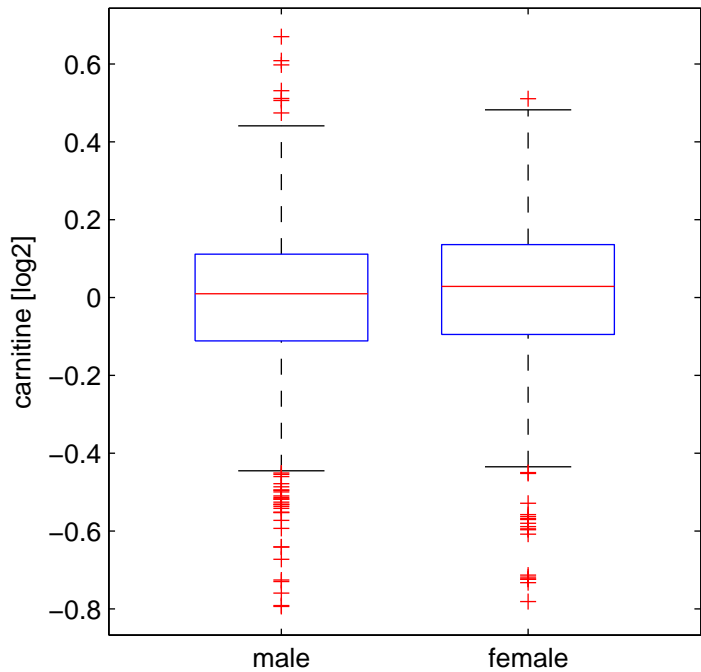

p-val: 6.66e-001

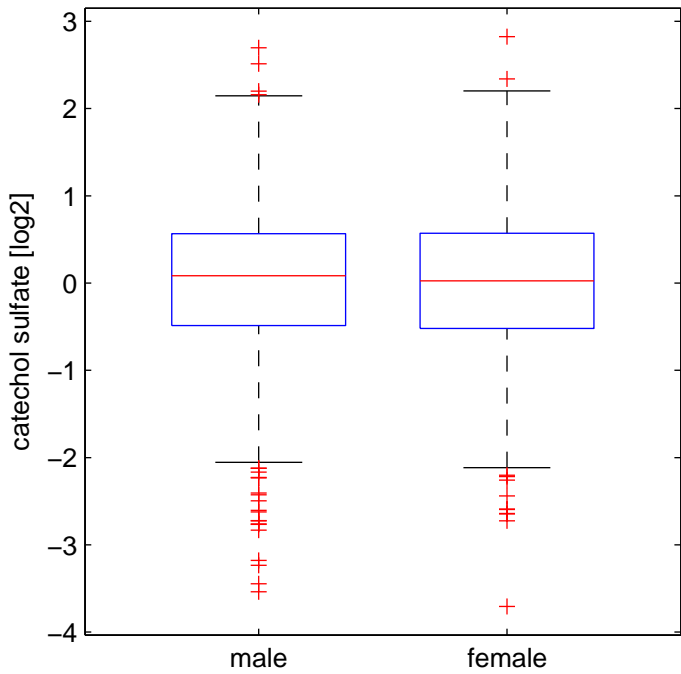

p-val: 2.15e-009

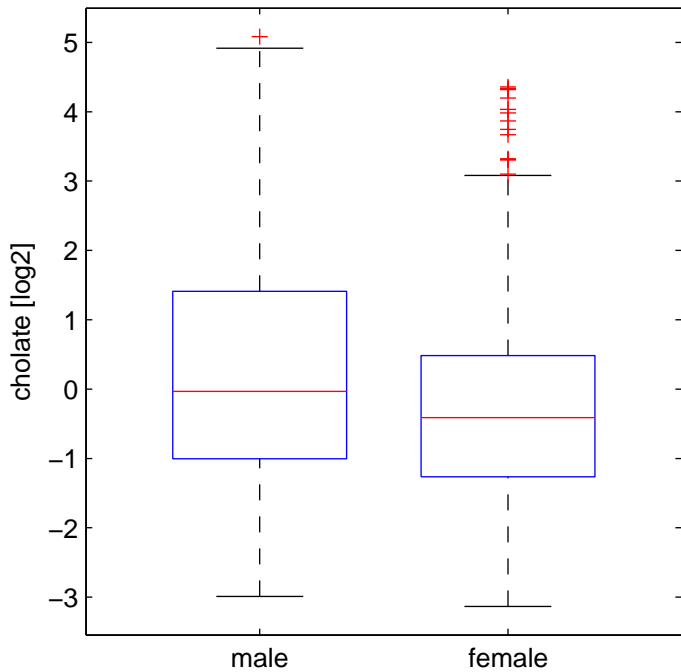



p-val: 8.78e-009

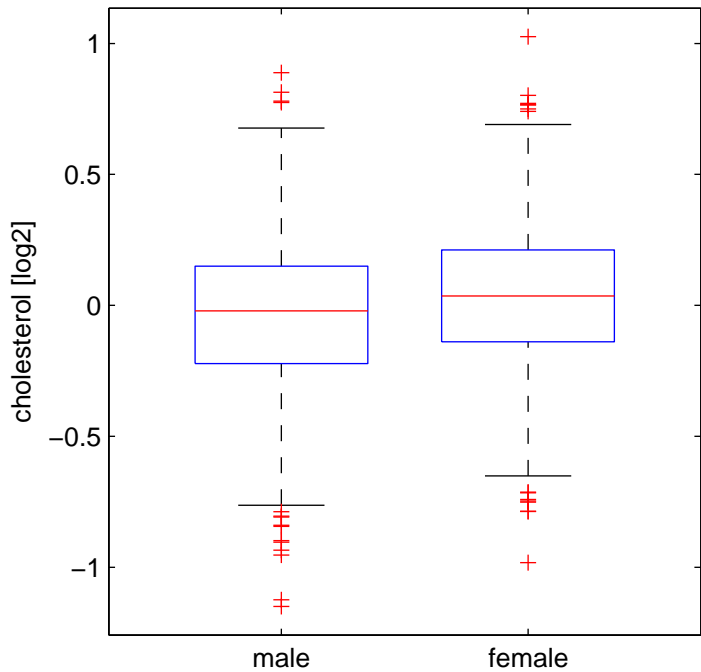

p-val: 1.50e-020

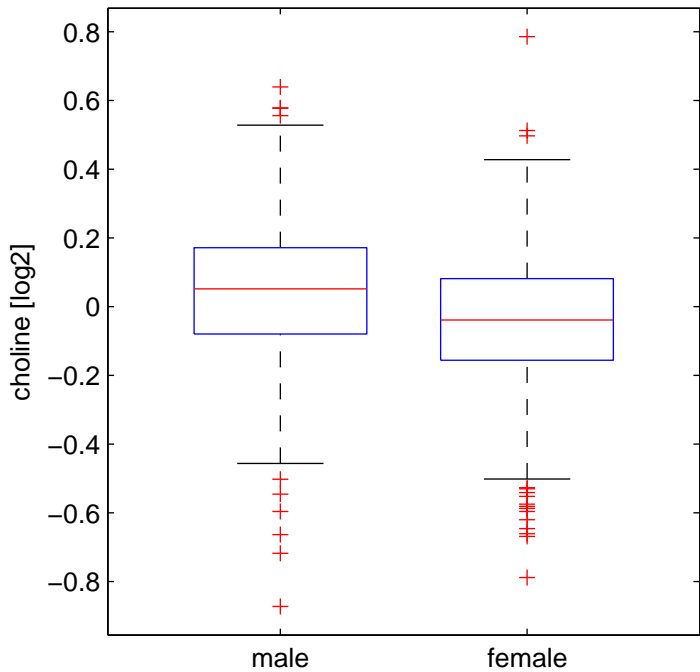

p-val: 7.11e-002

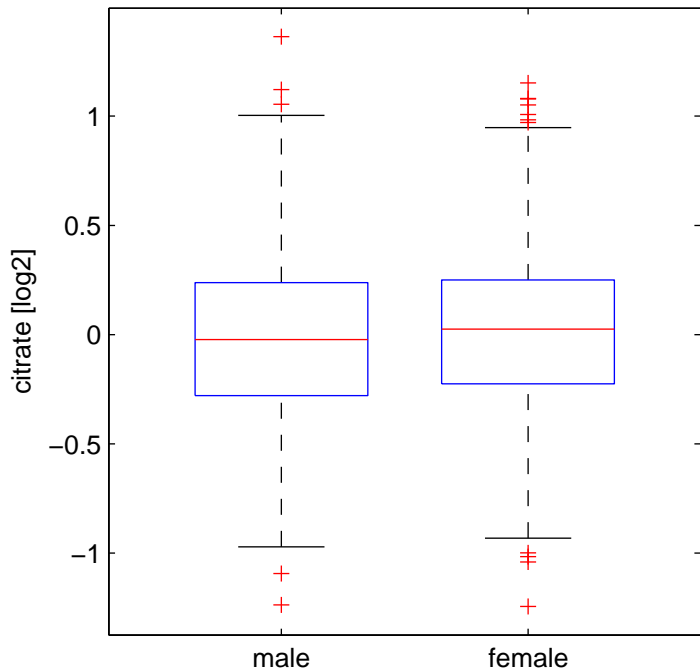

p-val: 3.12e-001

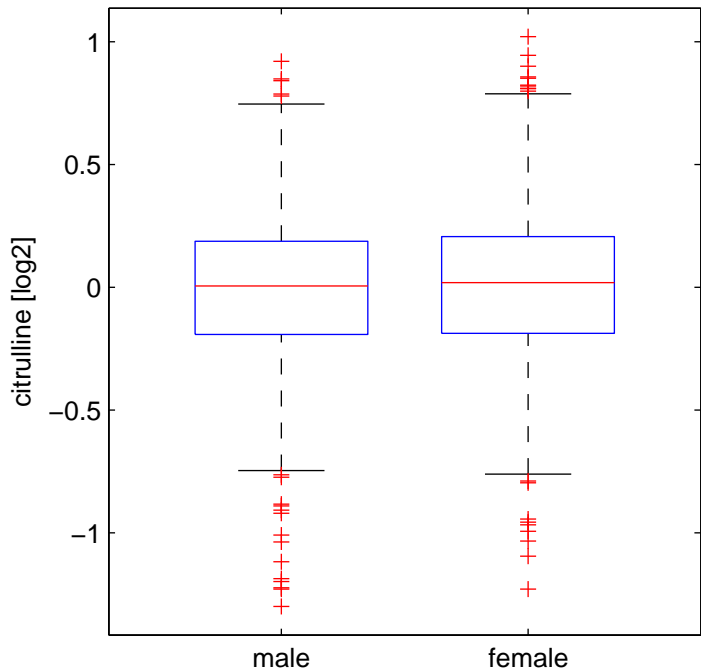

p-val: 6.90e-003

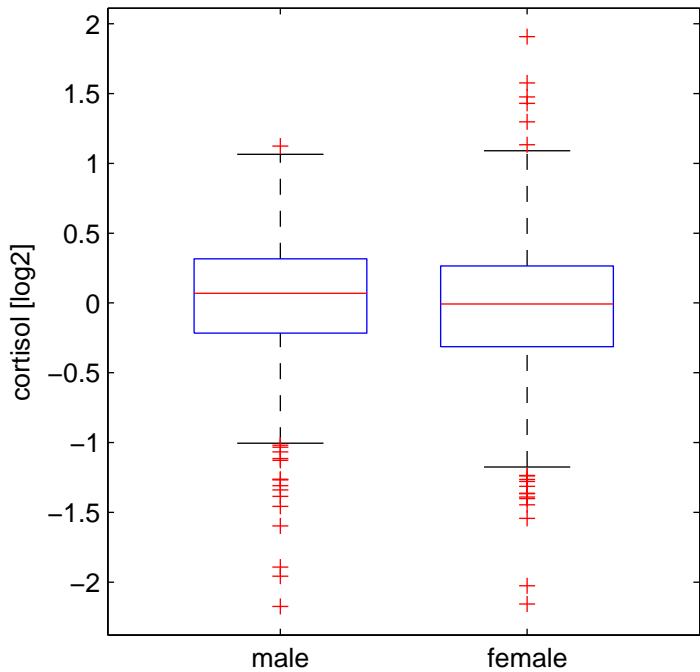

p-val: 2.27e-002

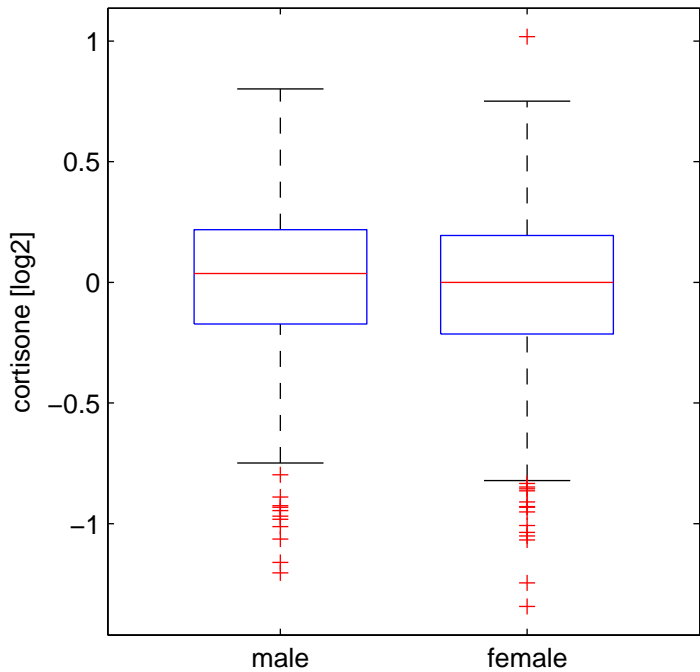

p-val: 1.86e-001

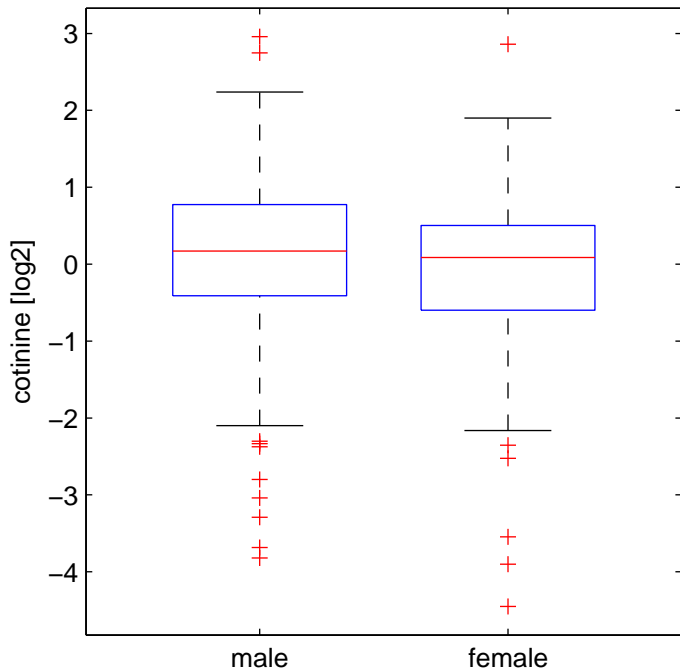

p-val: 3.65e-087

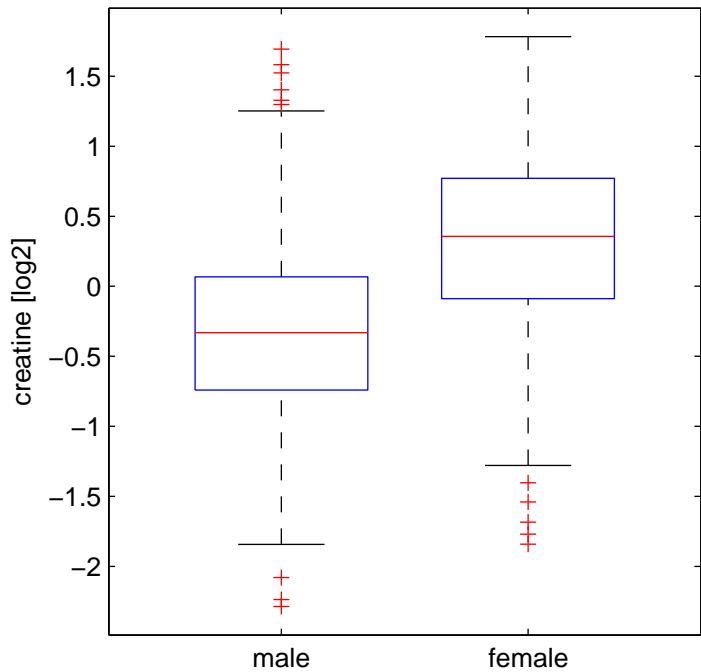



p-val:  $9.62 \times 10^{-50}$

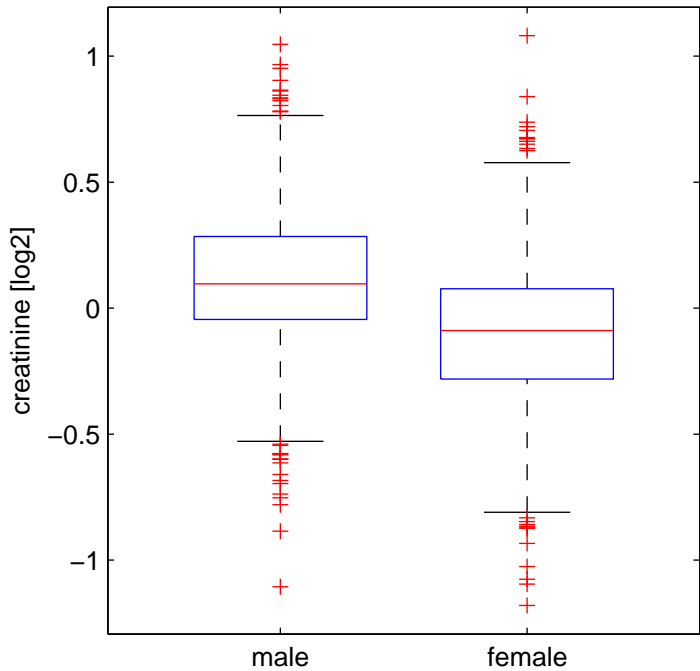

p-val: 3.67e-001

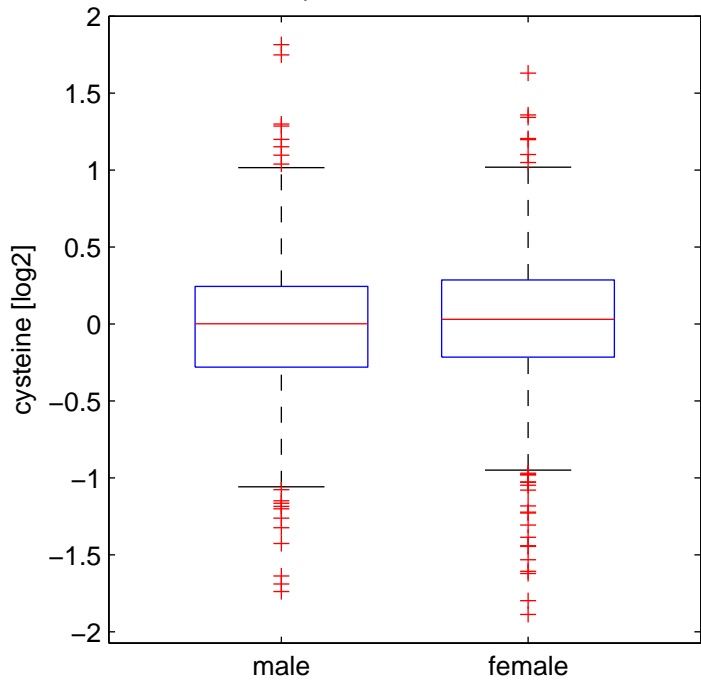

p-val: 1.50e-011

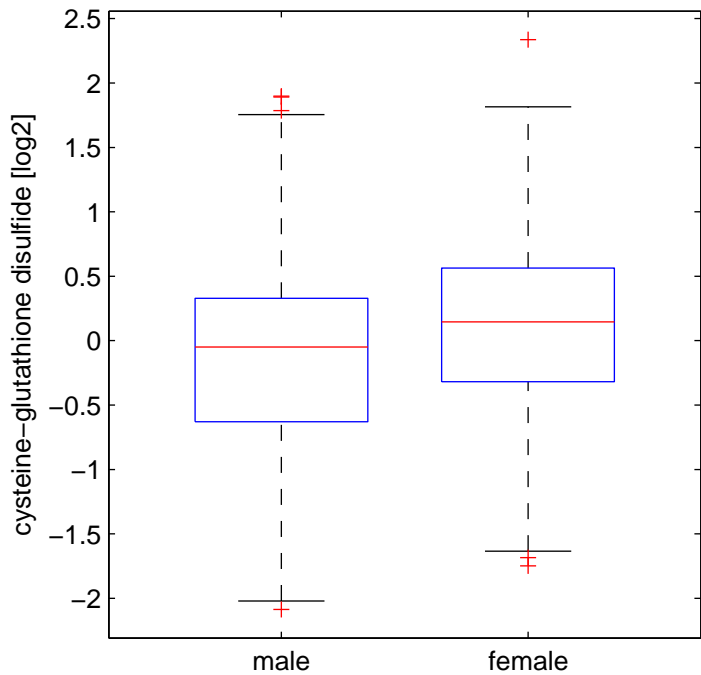

p-val: 2.96e-001

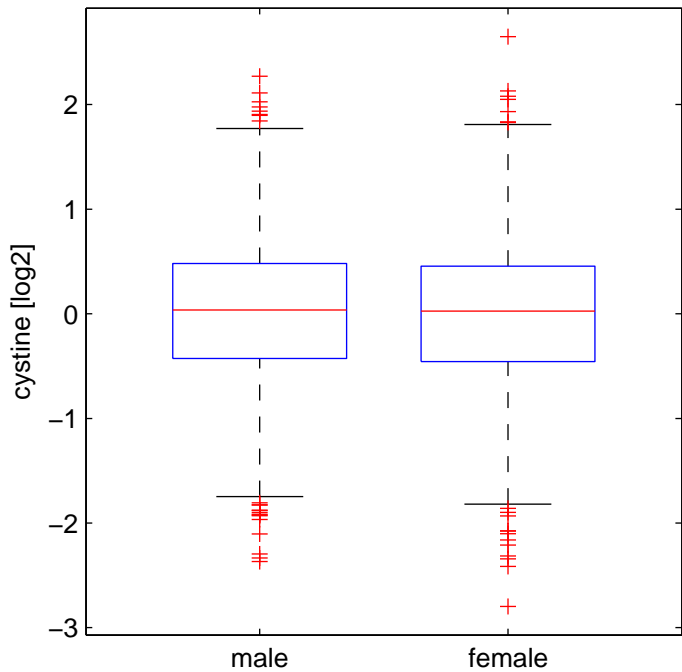

p-val: 6.15e-006

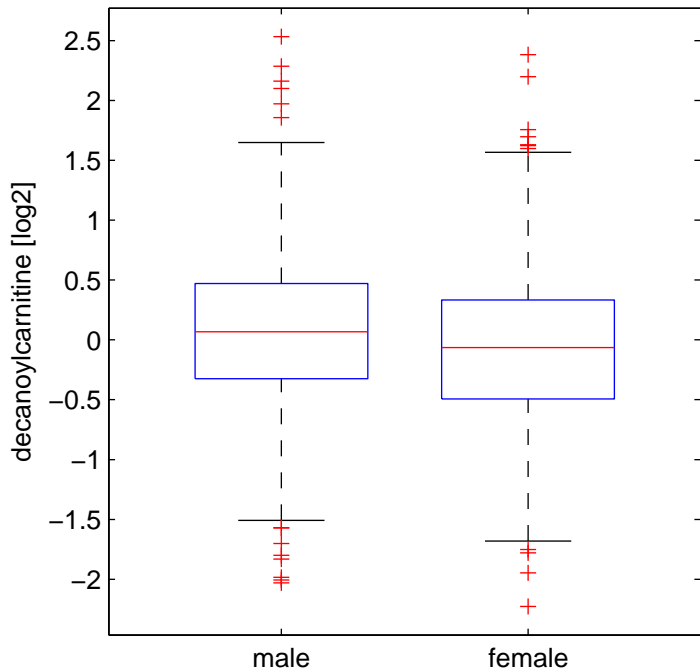

p-val: 1.62e-047

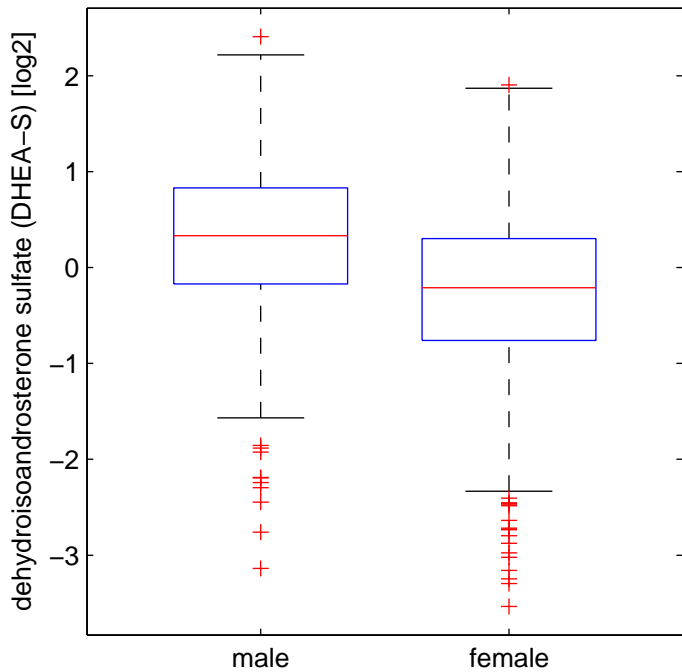

p-val: 3.45e-009

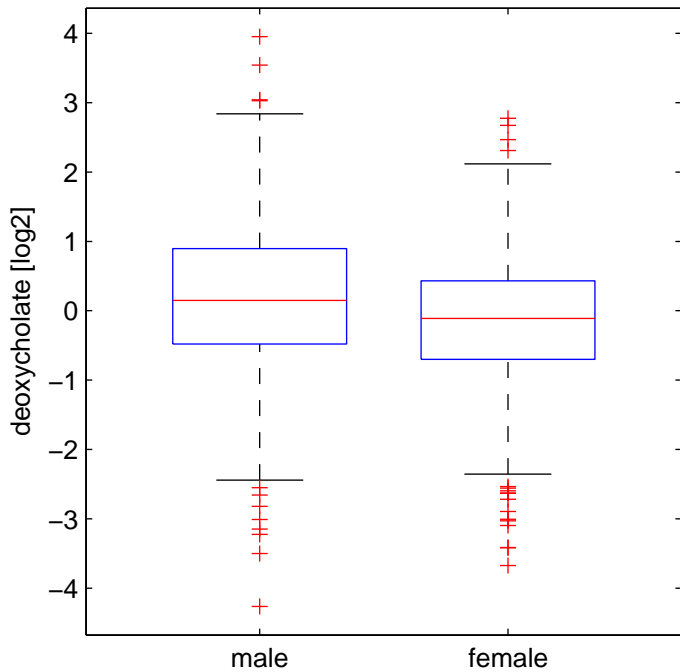

p-val: 4.45e-001

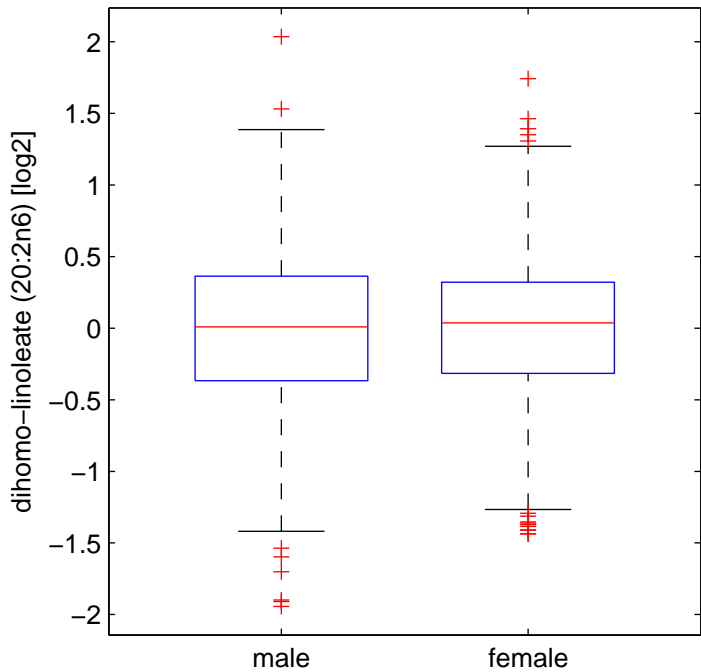



p-val: 5.96e-003

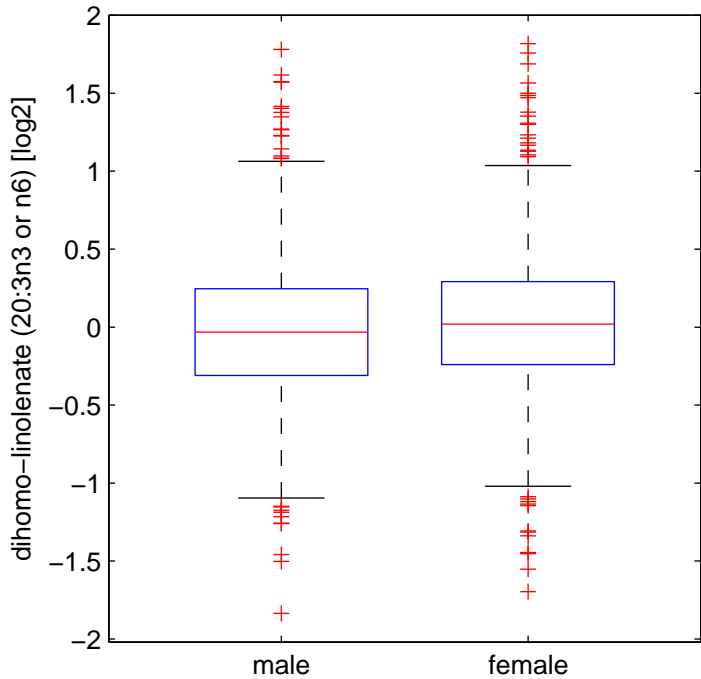

p-val: 1.30e-005

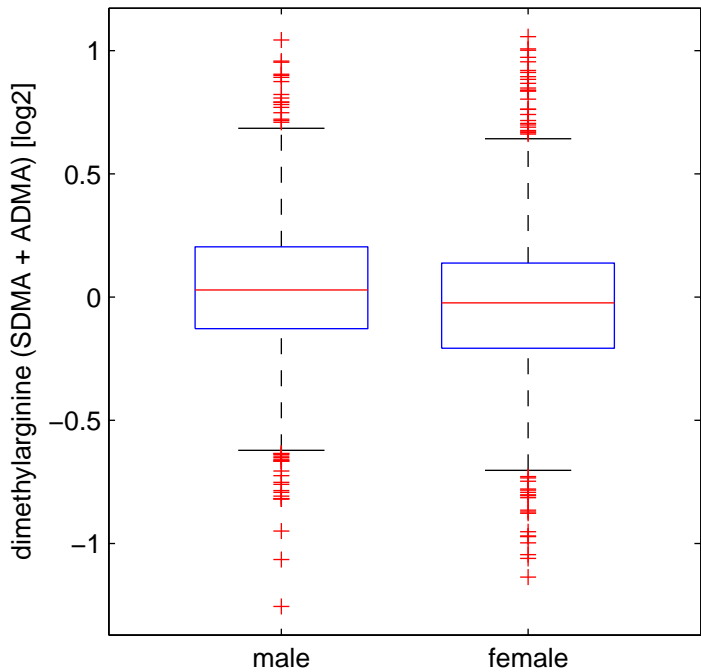

p-val: 5.25e-001

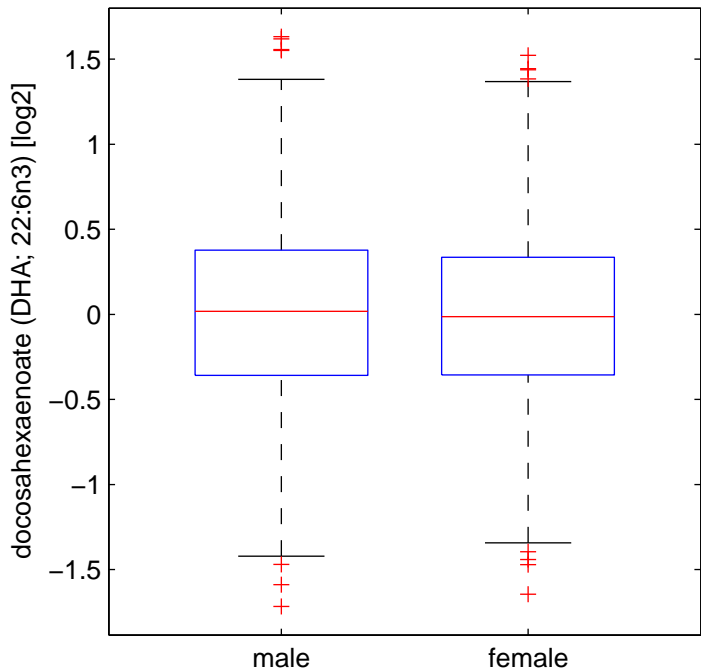

p-val: 1.60e-002

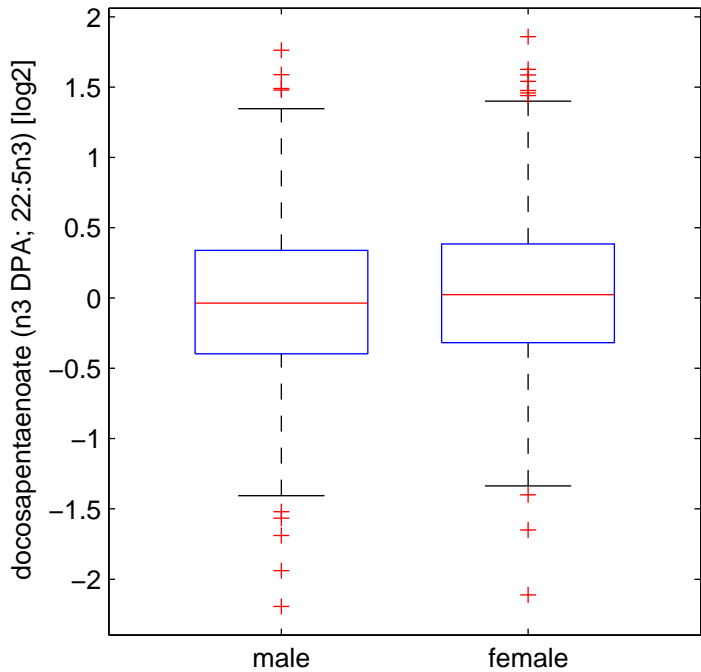

p-val: 1.74e-001

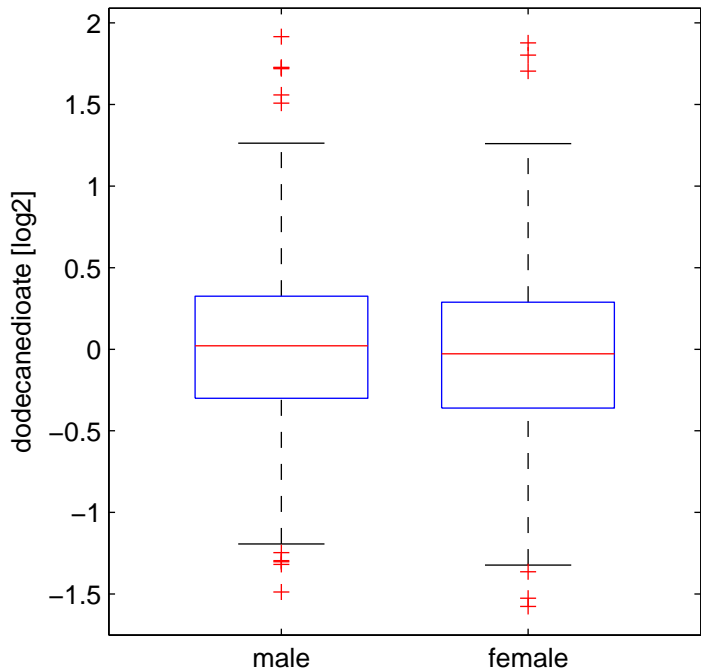

p-val: 2.39e-001

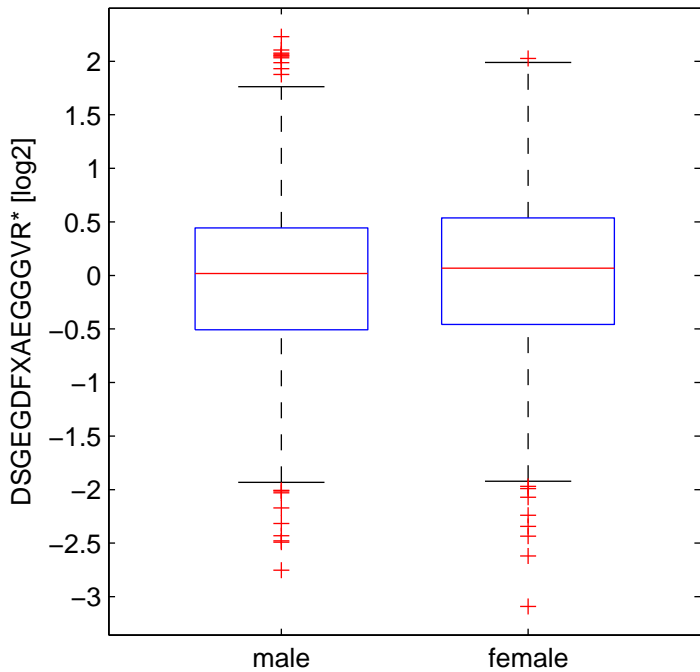

p-val: 1.45e-001

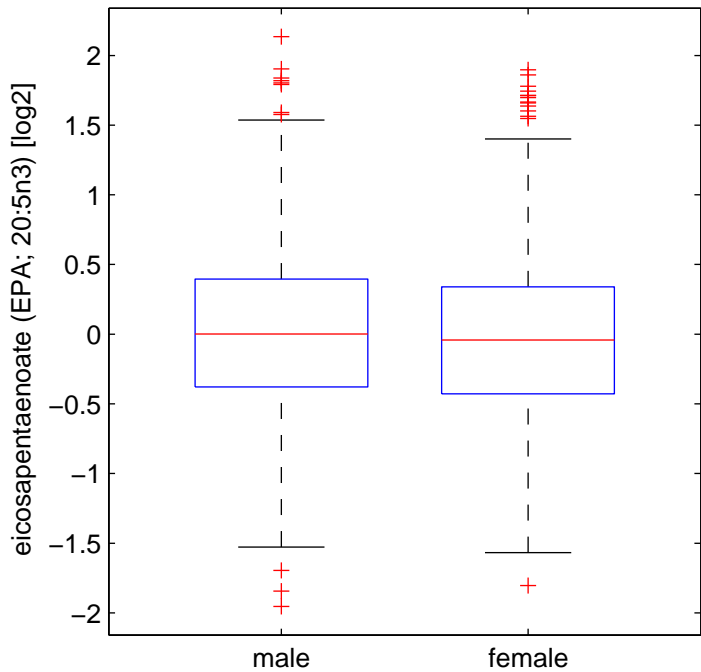

p-val: 4.64e-001

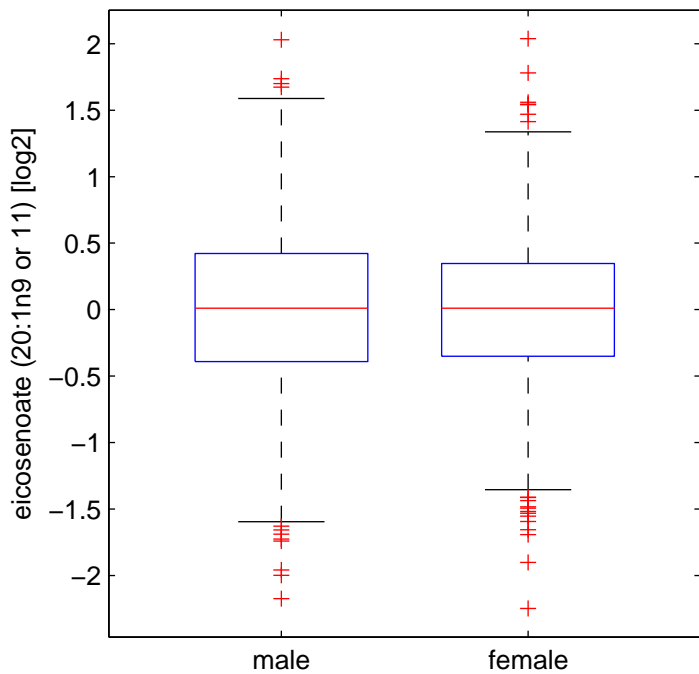



p-val: 5.62e-059

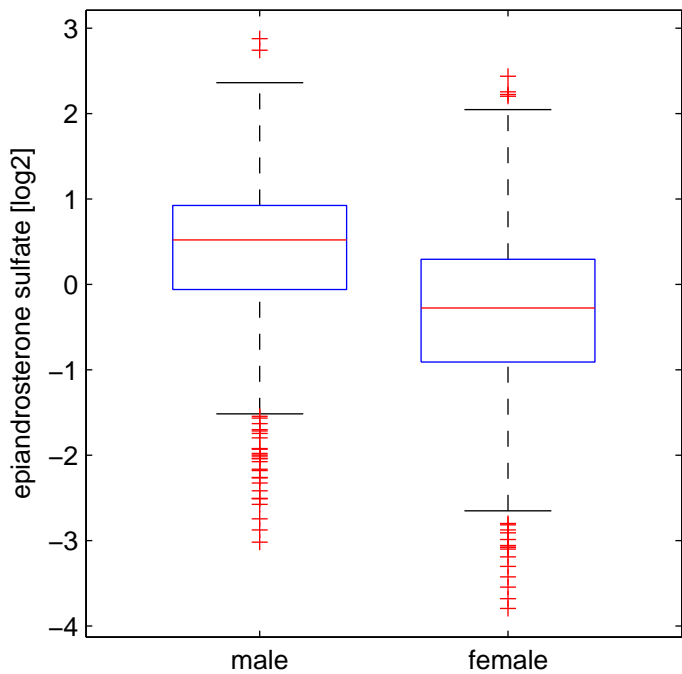

p-val: 1.83e-003

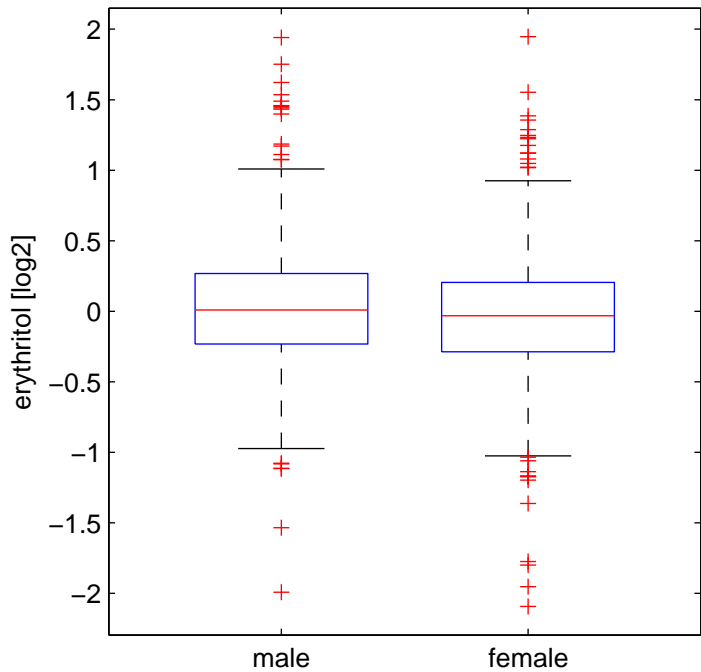

p-val: 3.48e-005

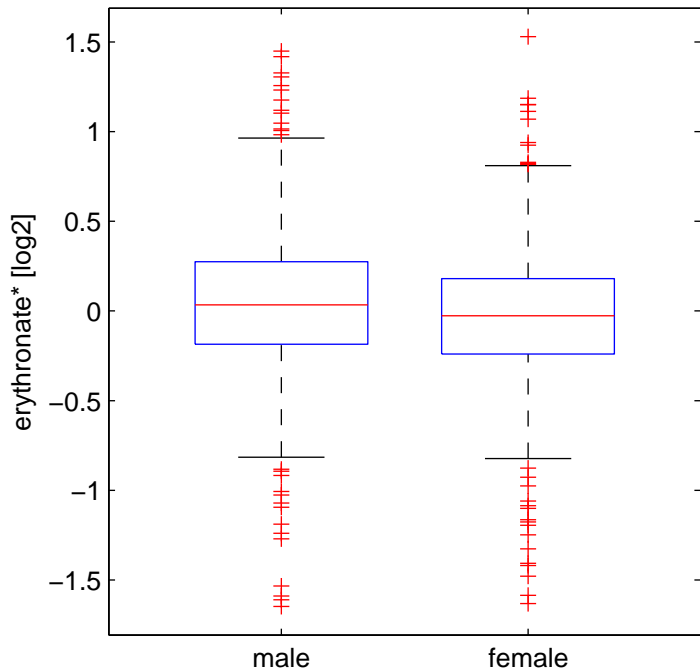

p-val: 4.36e-001

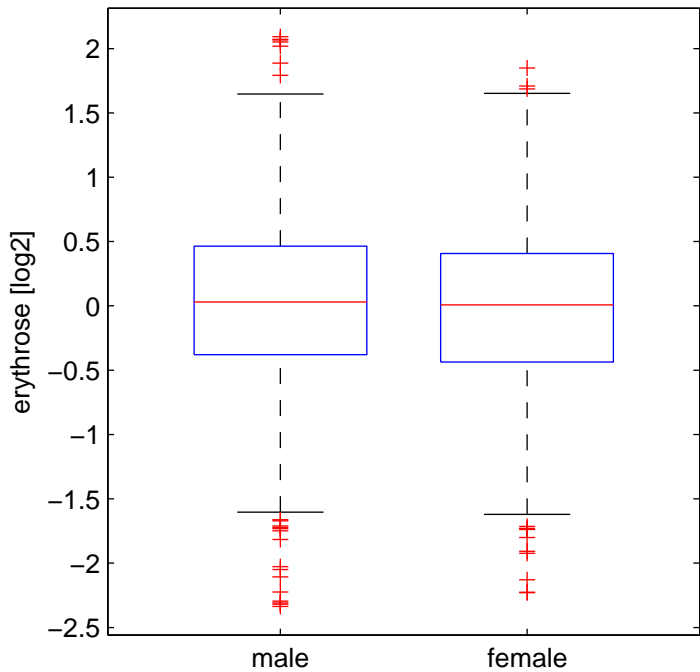

p-val: 3.42e-005

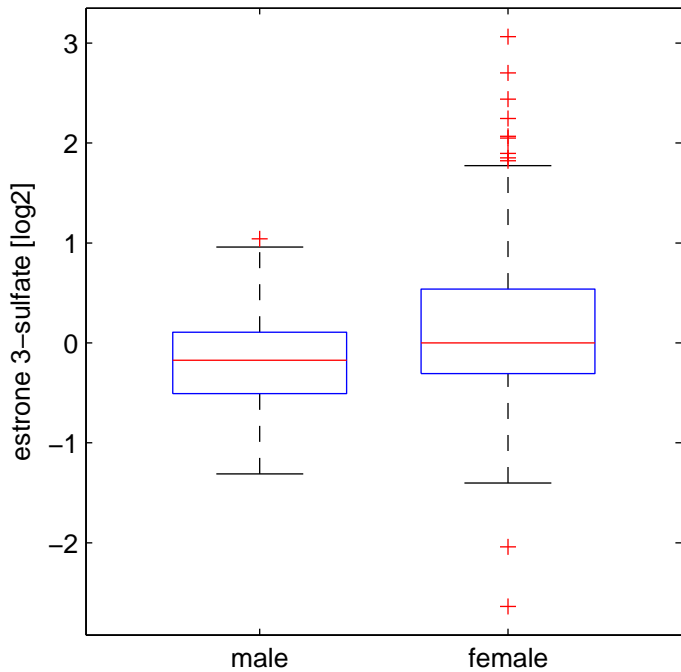

p-val: 3.08e-003

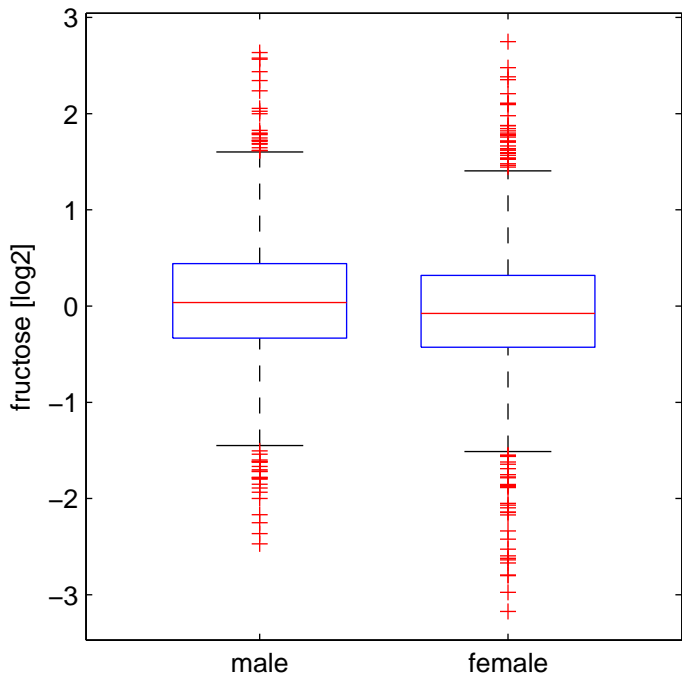

p-val: 6.31e-001

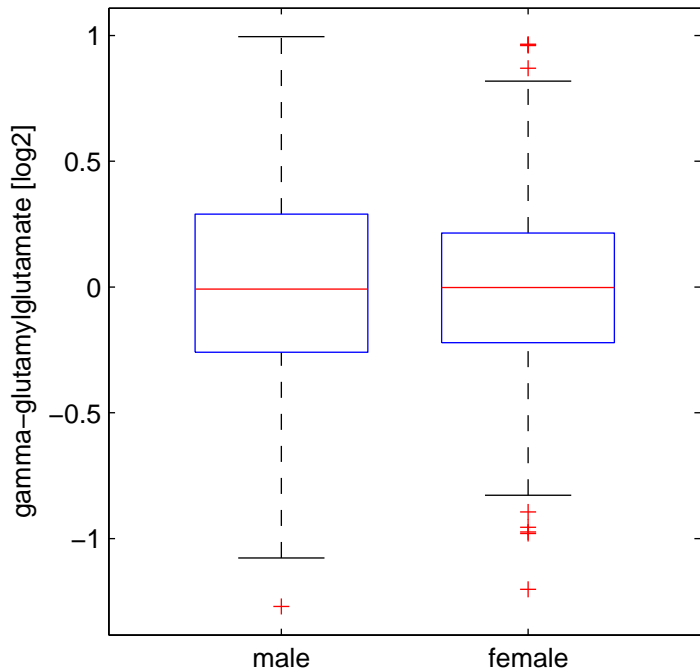

p-val: 1.54e-006

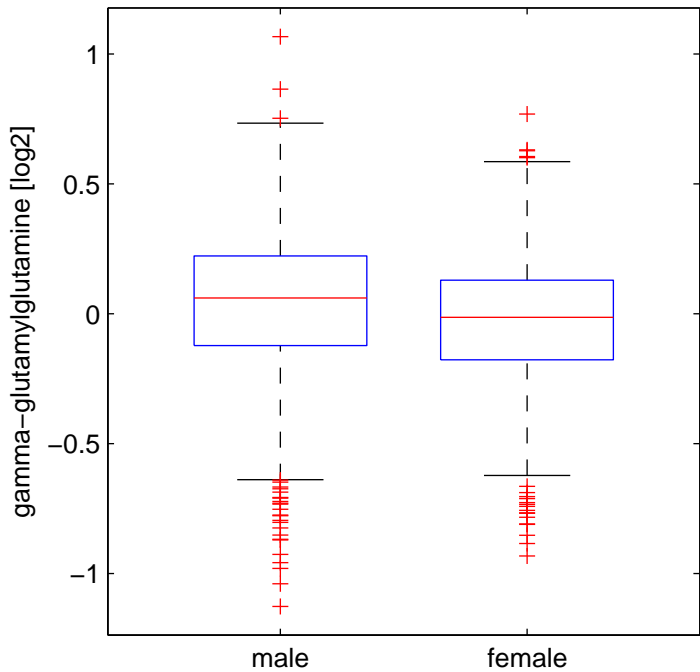



p-val: 2.44e-019

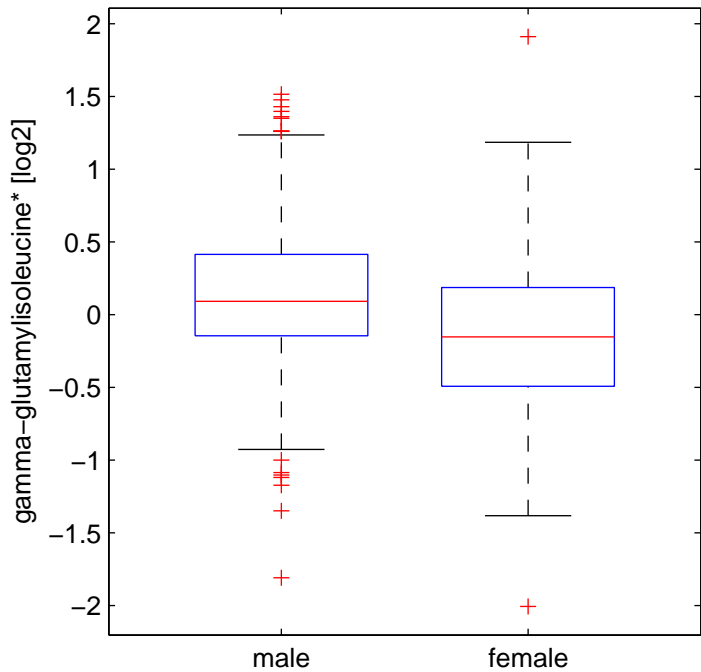

p-val: 3.92e-099

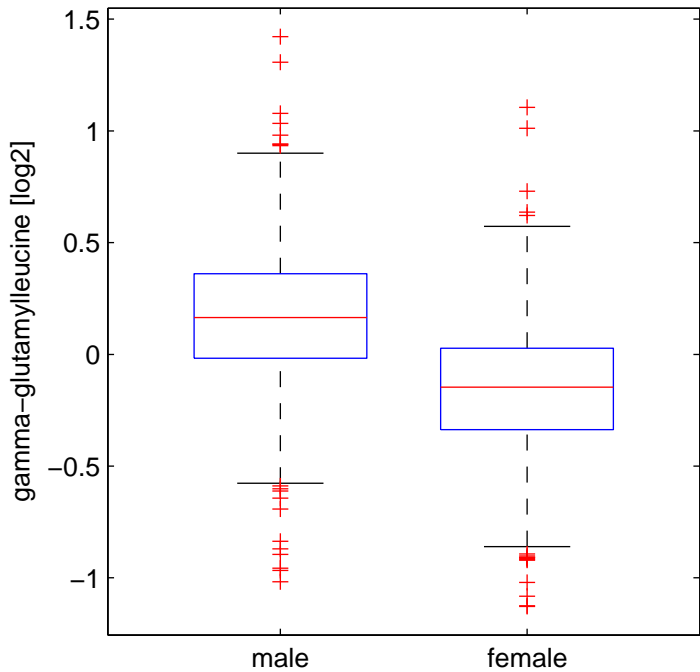

p-val: 4.89e-004

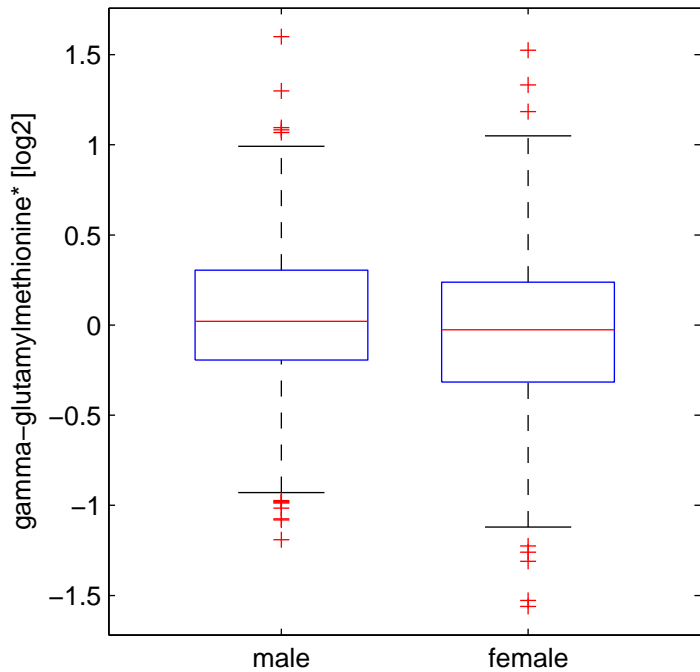

p-val: 1.20e-022

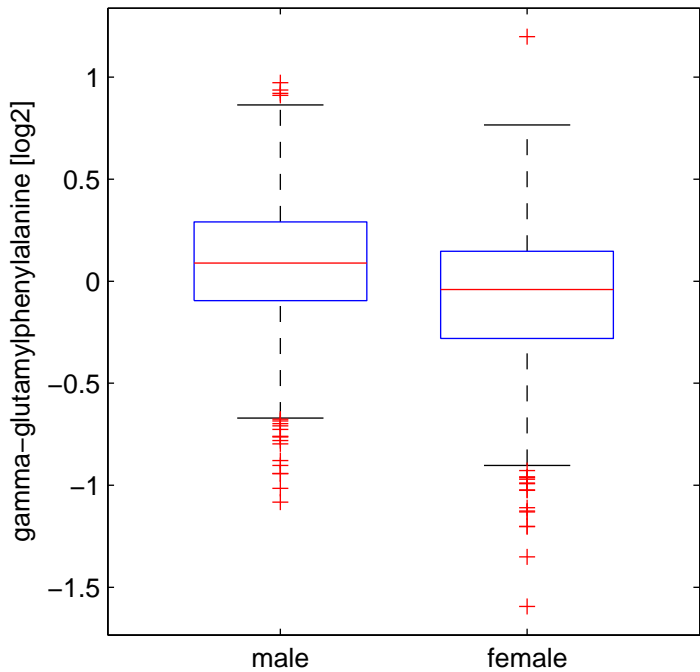

p-val: 1.99e-002

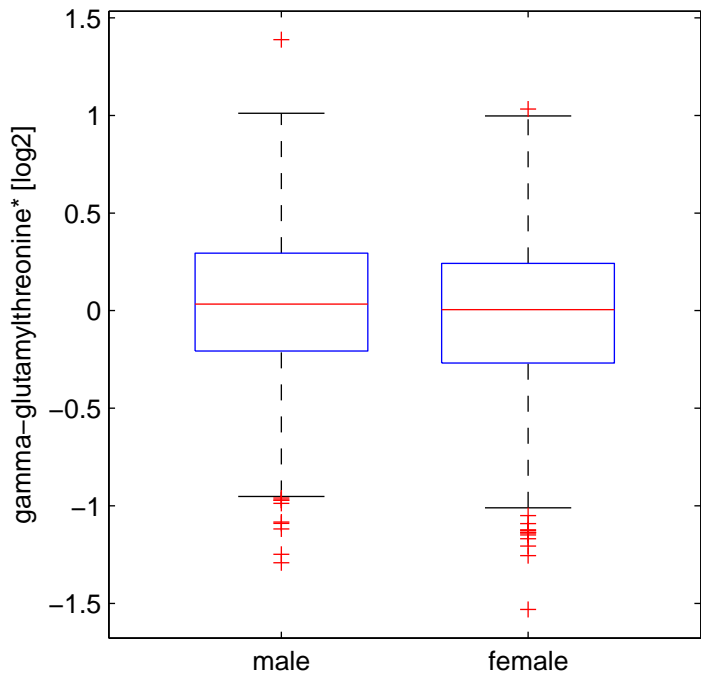

p-val: 2.93e-014

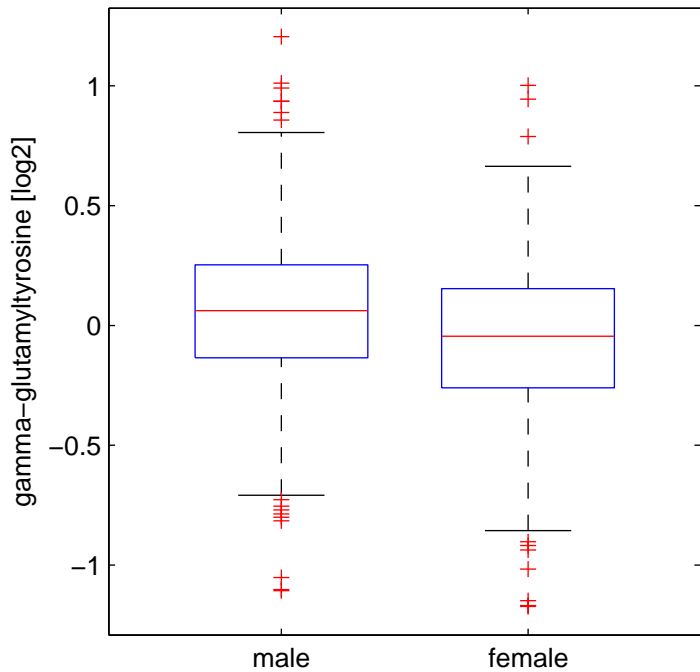

p-val:  $7.56e-056$

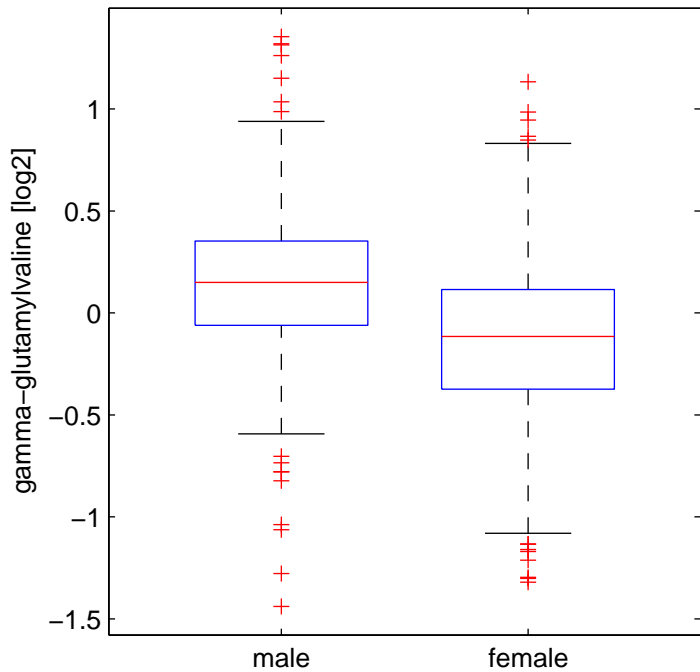

p-val: 3.36e-001

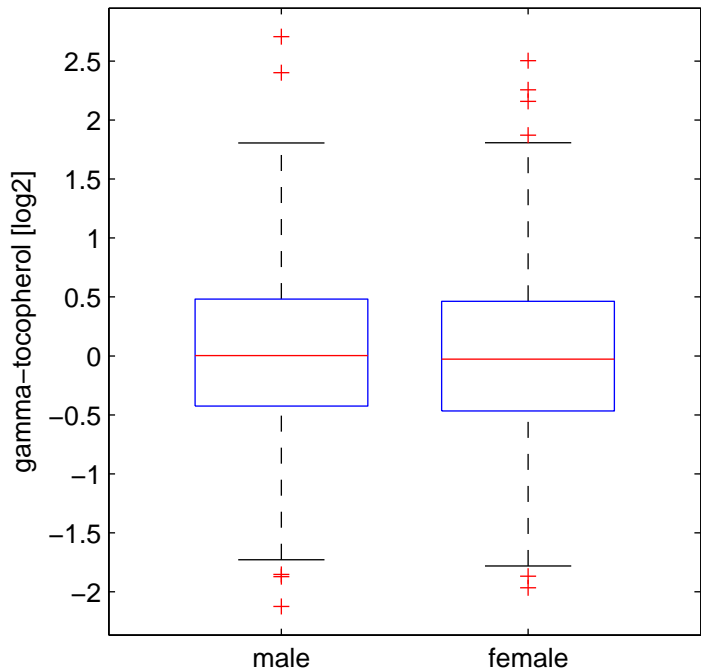



p-val: 1.25e-012

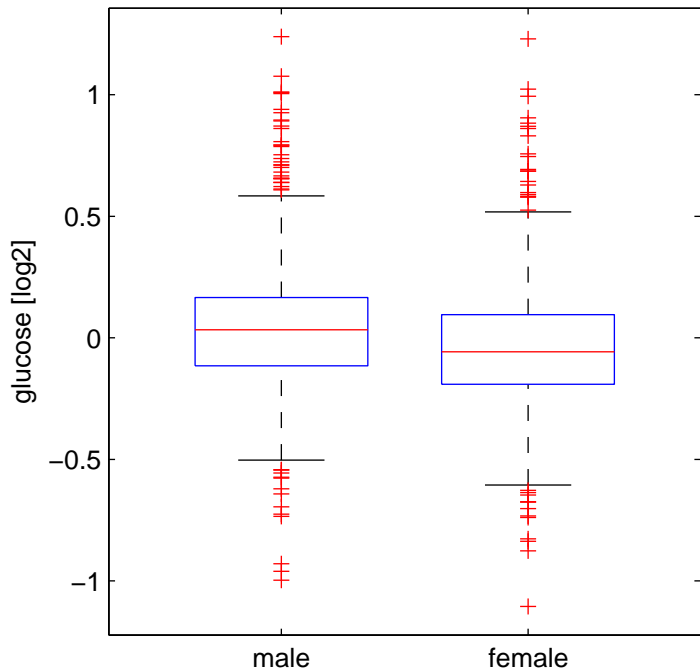

p-val: 2.19e-021

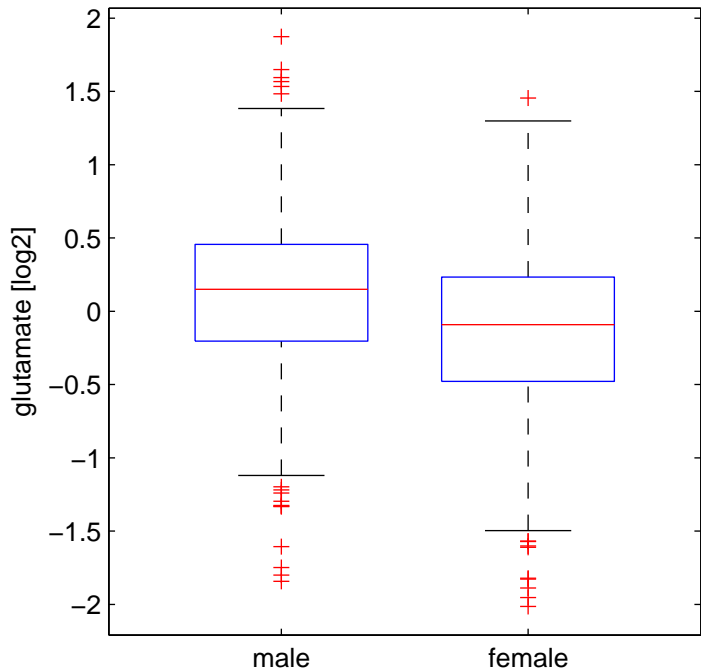

p-val: 3.98e-003

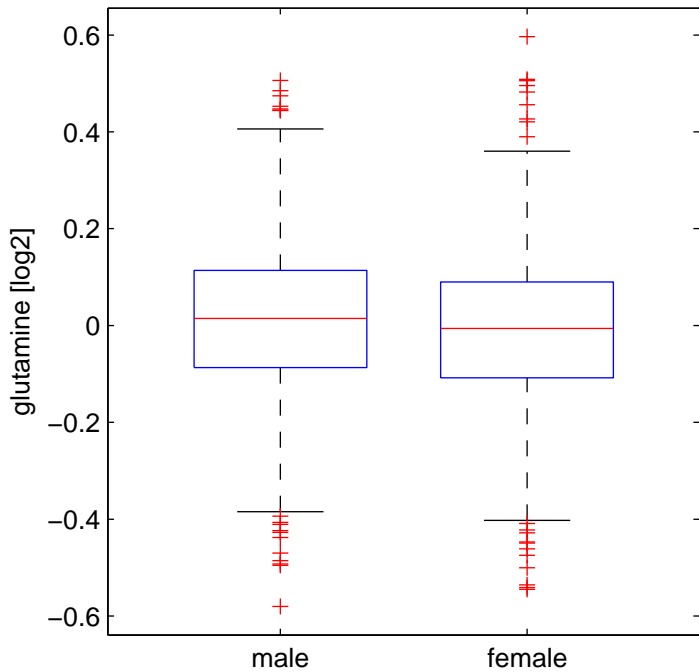

p-val: 2.94e-018

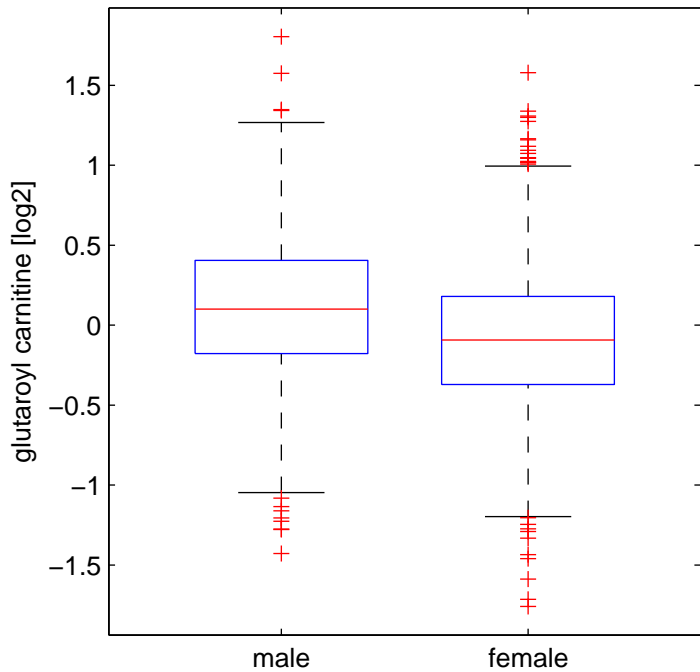

p-val: 1.41e-001

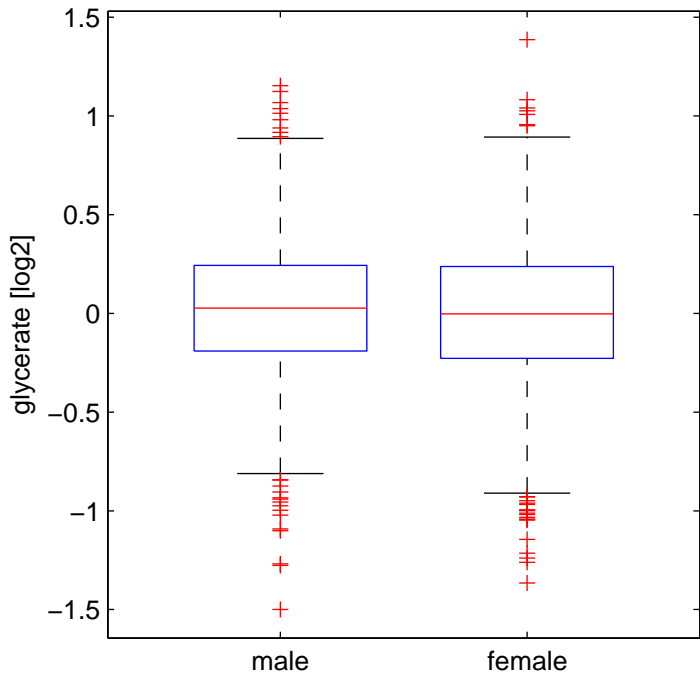

p-val: 1.01e-073

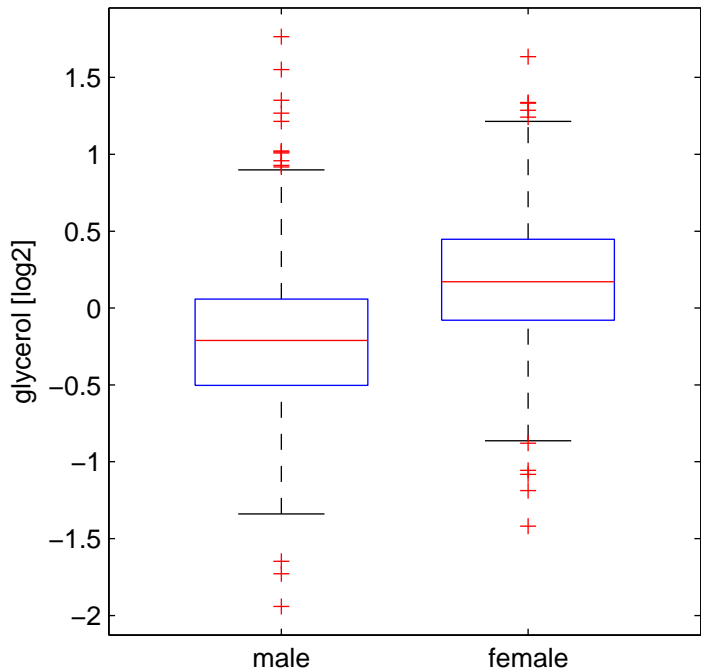

p-val: 3.46e-001

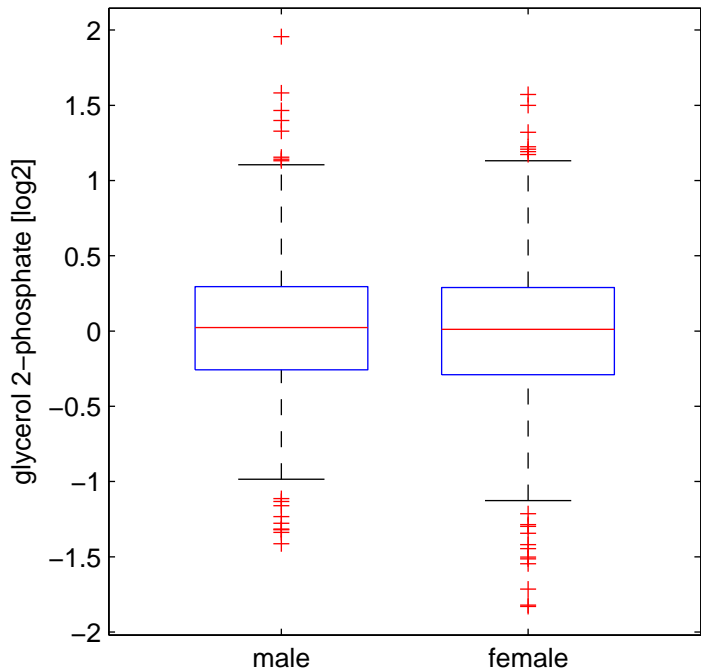

p-val: 1.21e-001

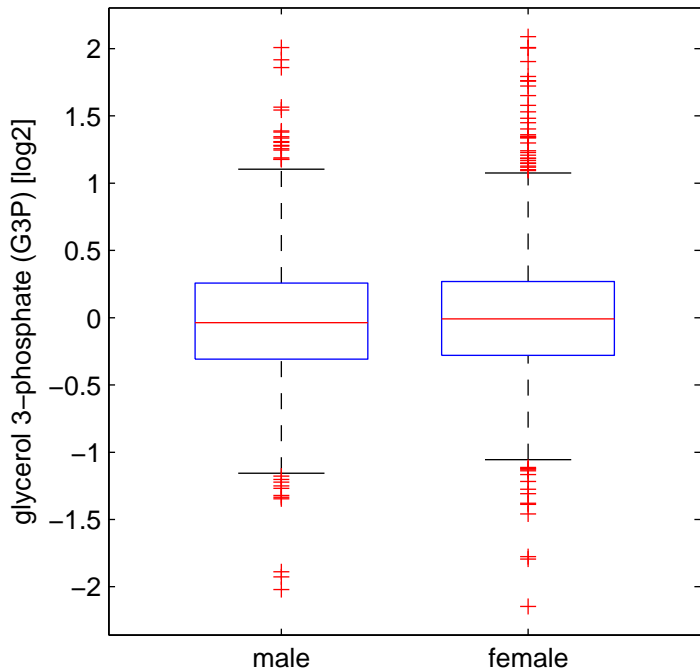



p-val: 1.51e-002

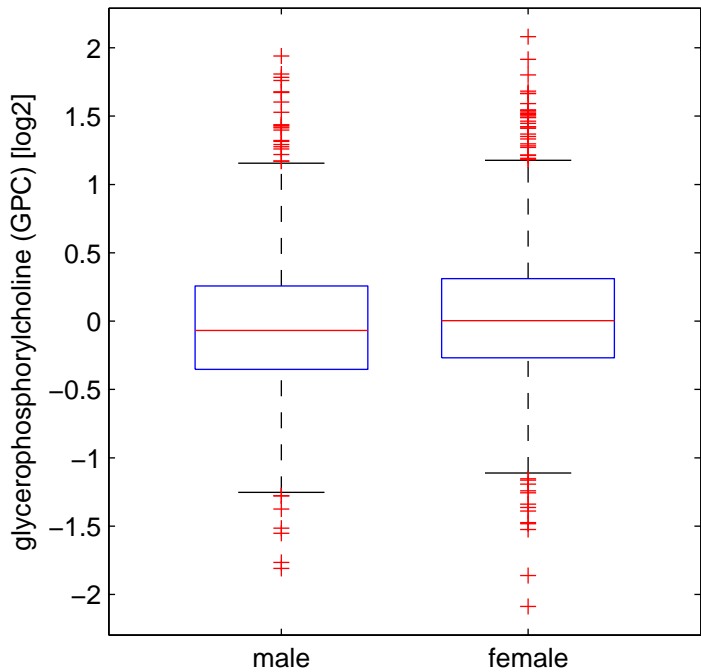

p-val: 1.49e-040

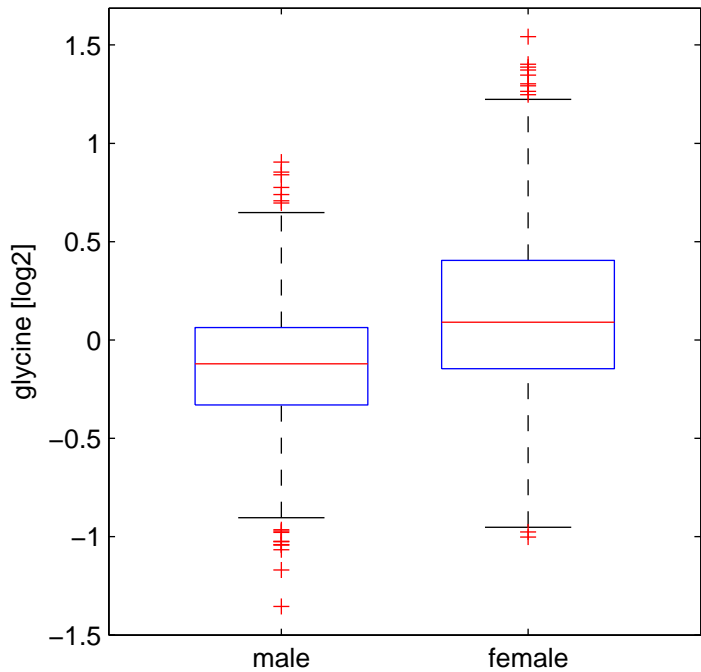

p-val: 1.09e-007

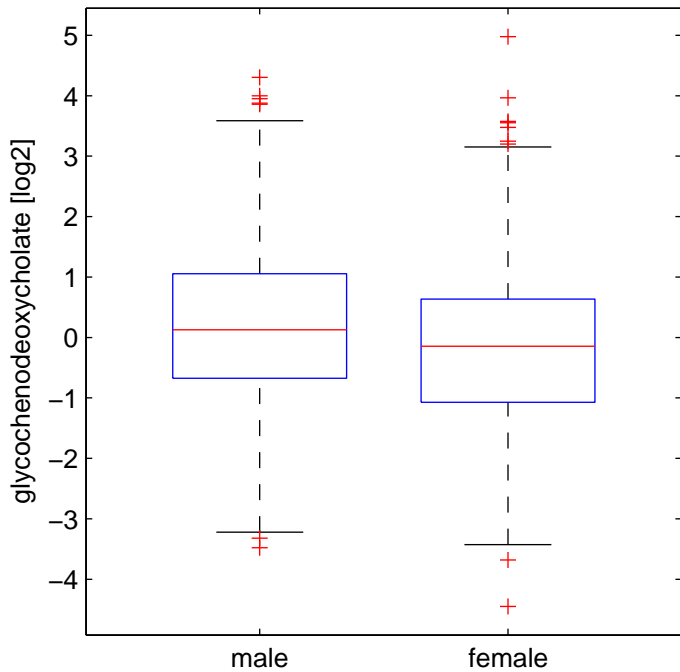

p-val: 8.46e-004

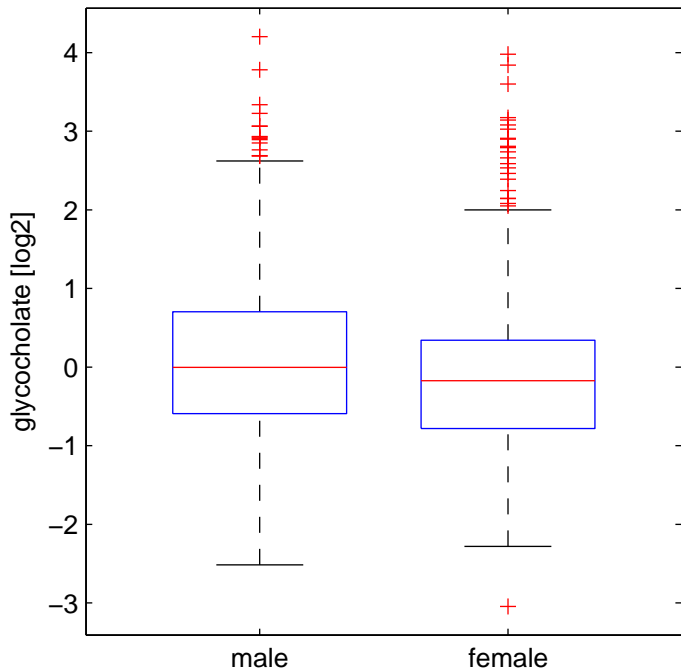

p-val: 1.68e-004

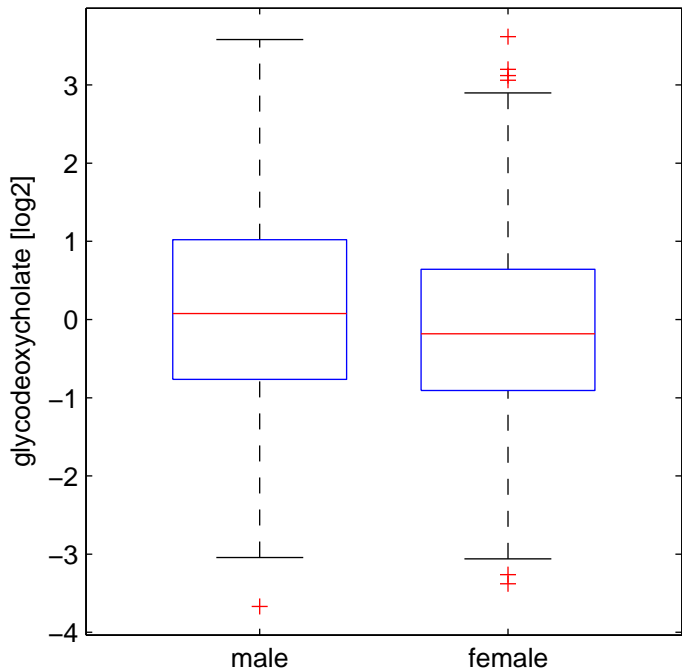

p-val: 3.67e-001

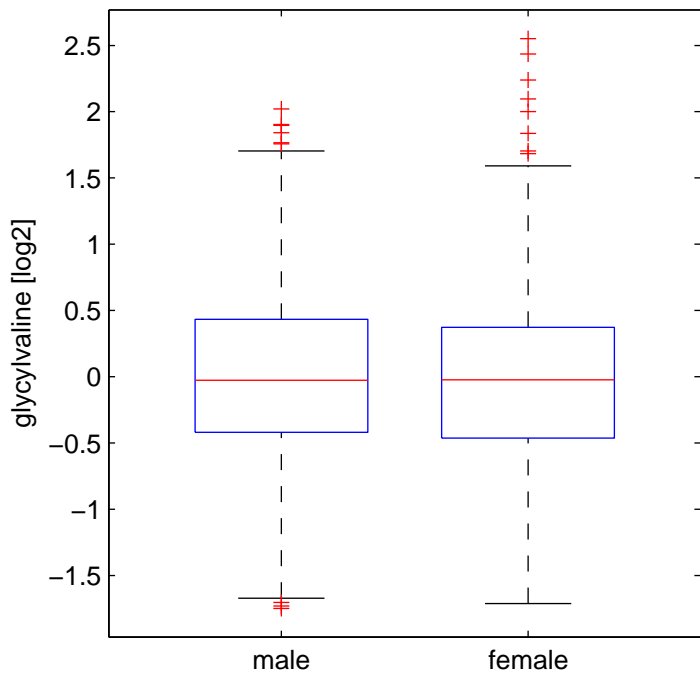

p-val: 1.04e-002

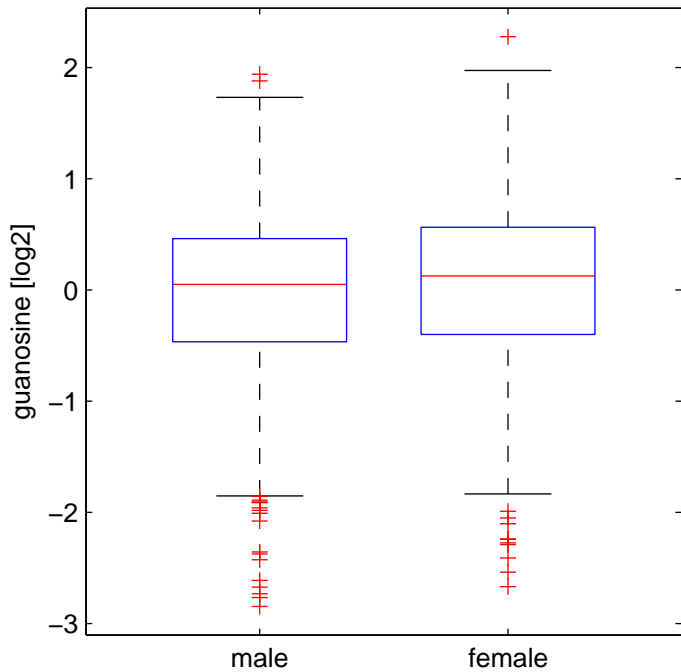

p-val: 3.32e-005

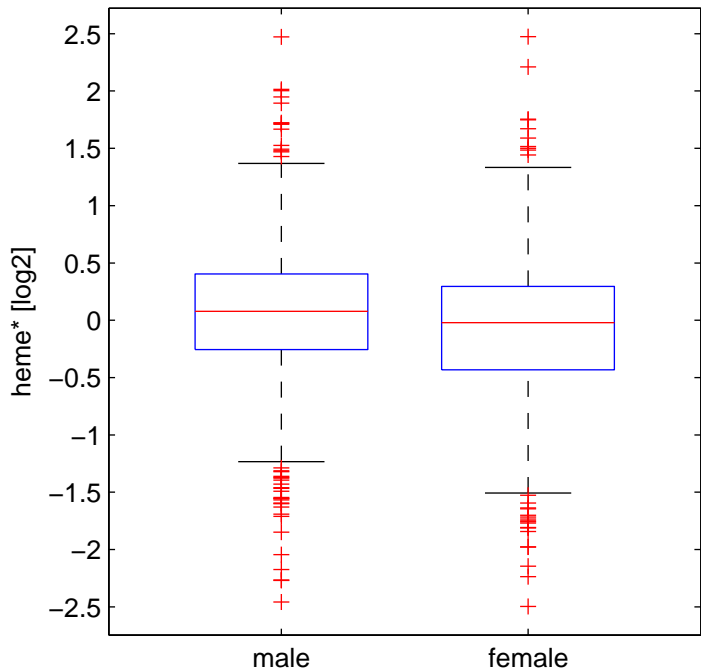



p-val: 5.48e-004

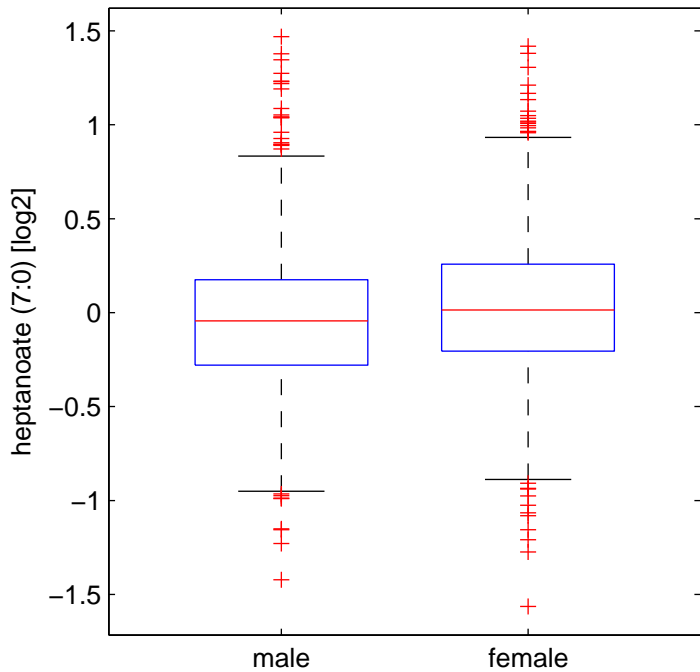

p-val: 1.97e-002

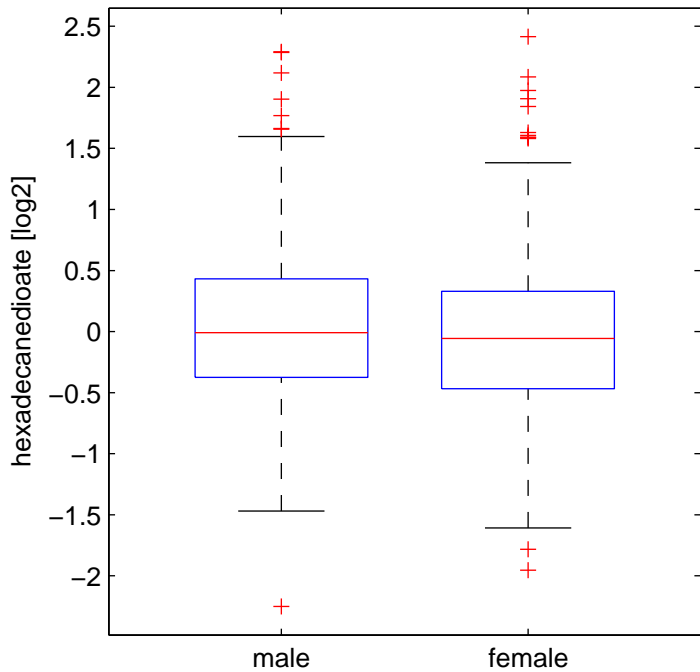

p-val: 8.66e-003

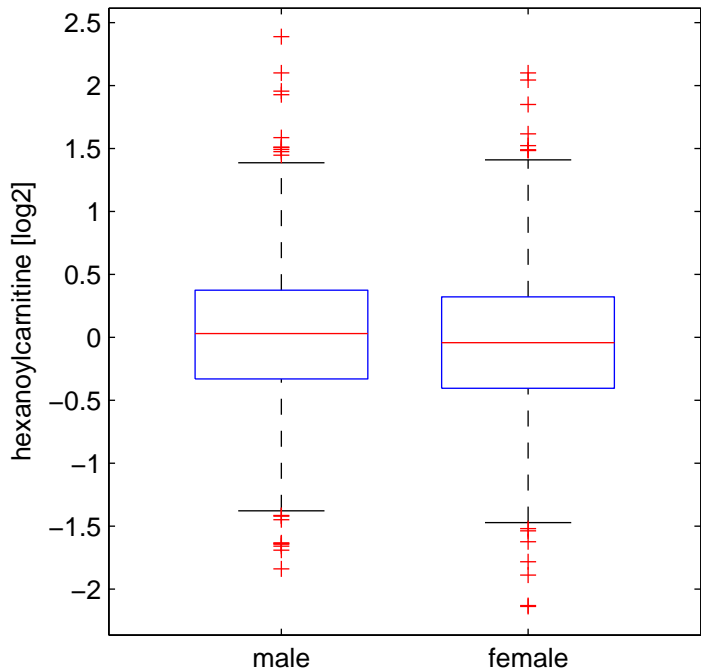

p-val: 4.19e-003

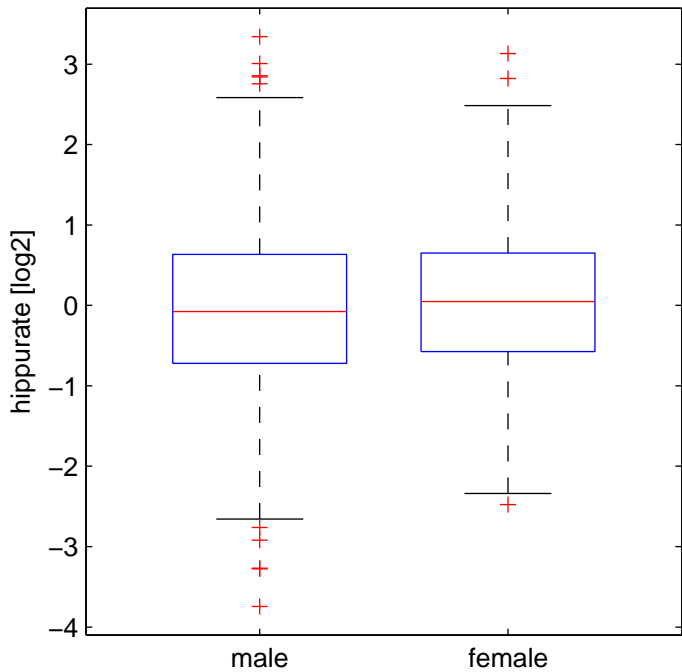

p-val: 2.00e-006

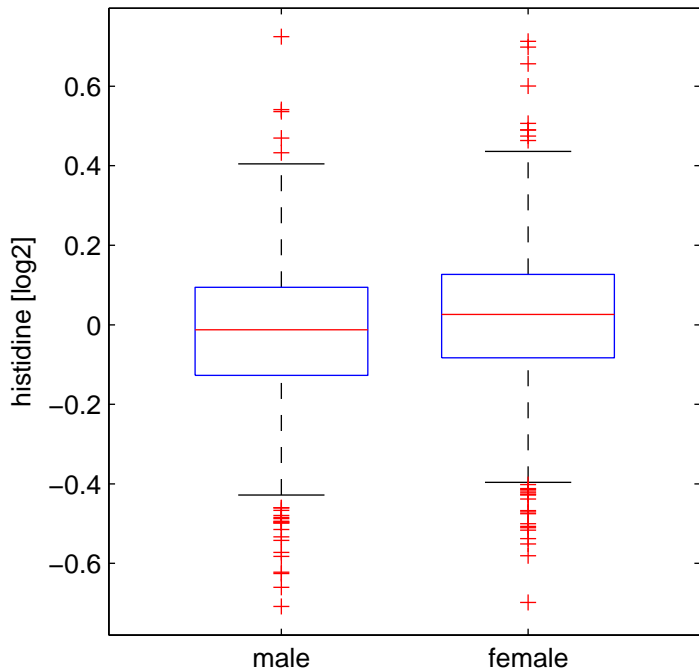

p-val: 4.72e-001

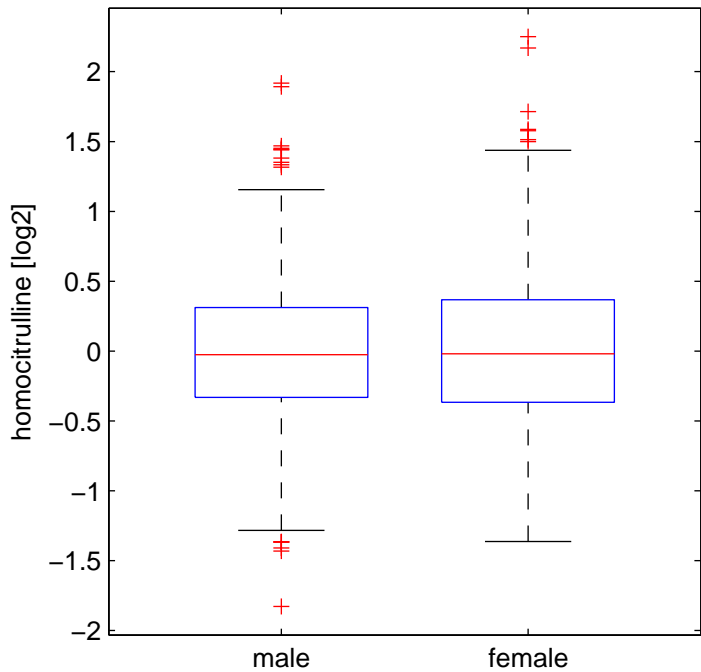

p-val: 1.21e-001

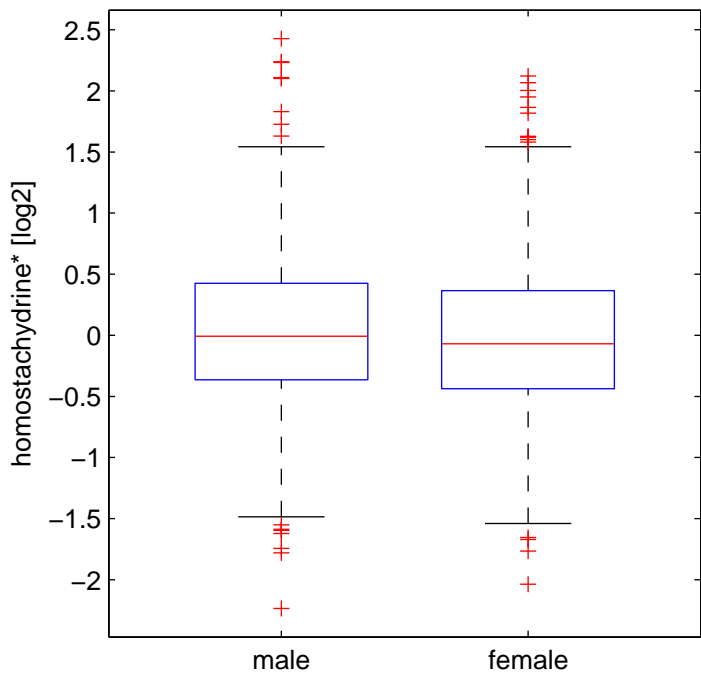

p-val: 1.85e-002

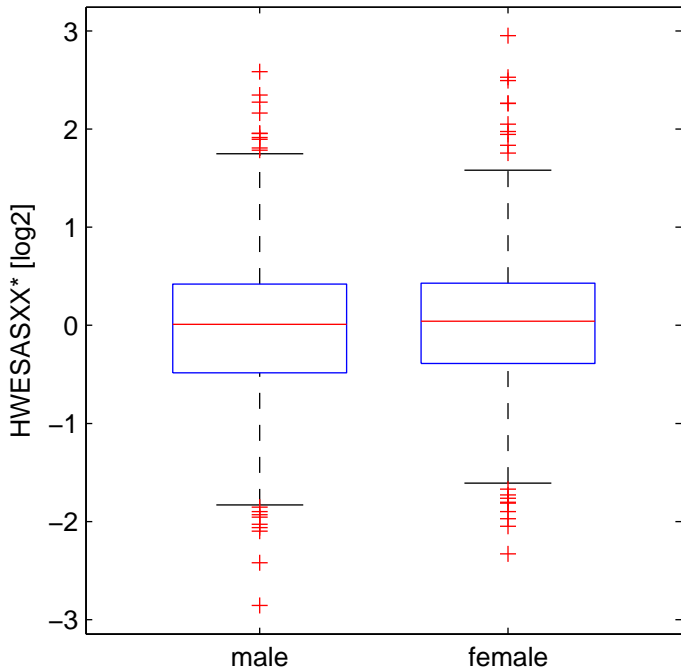



p-val: 6.07e-002

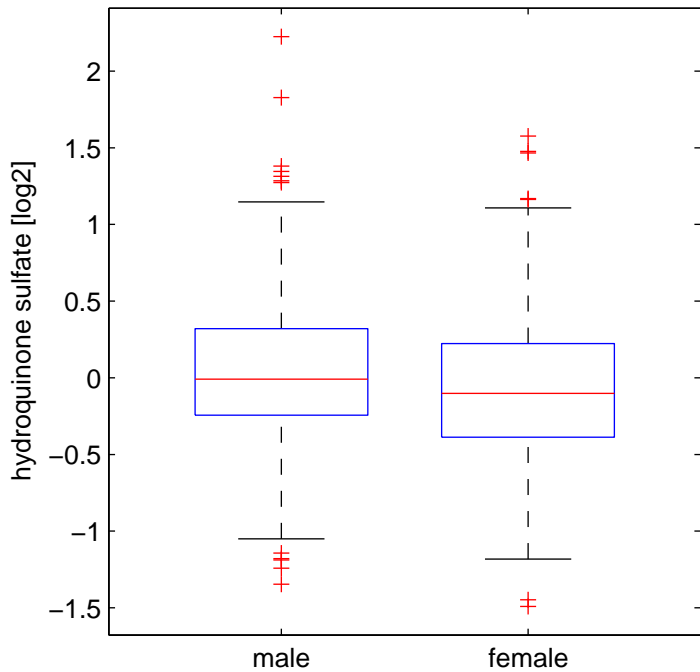

p-val: 3.98e-012

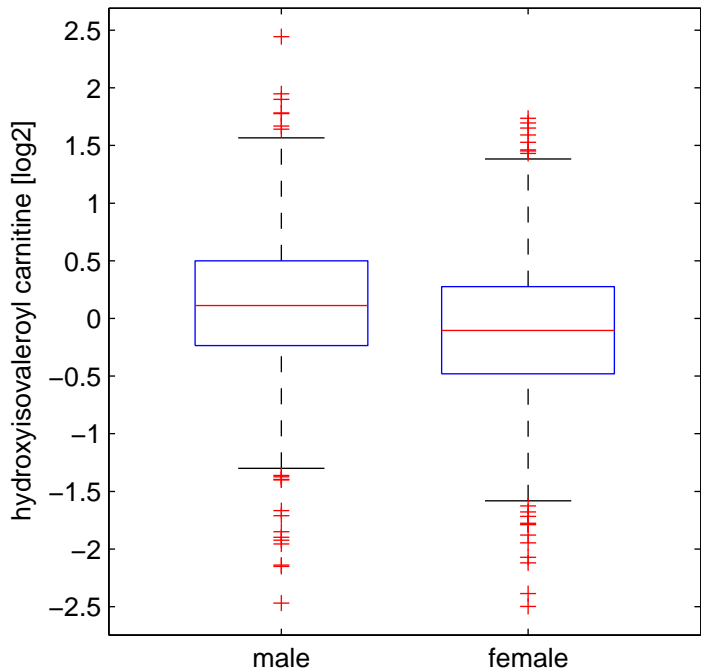

p-val: 1.28e-004

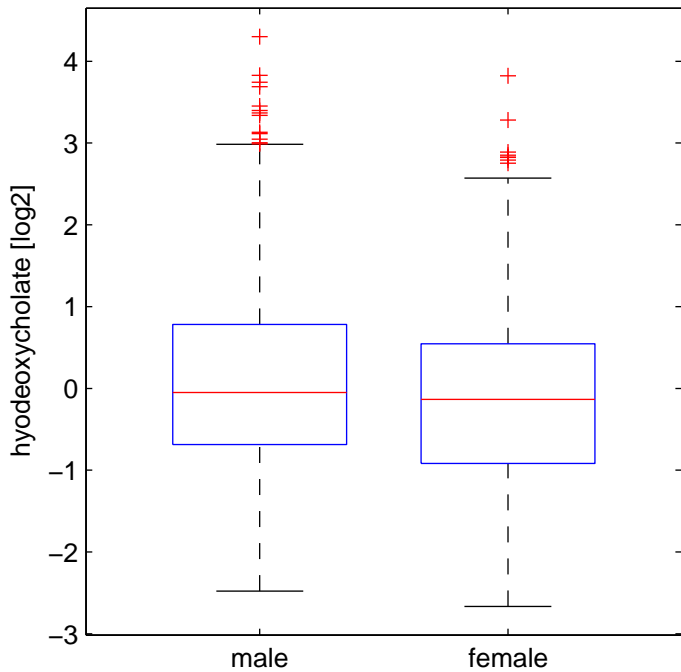

p-val: 3.54e-005

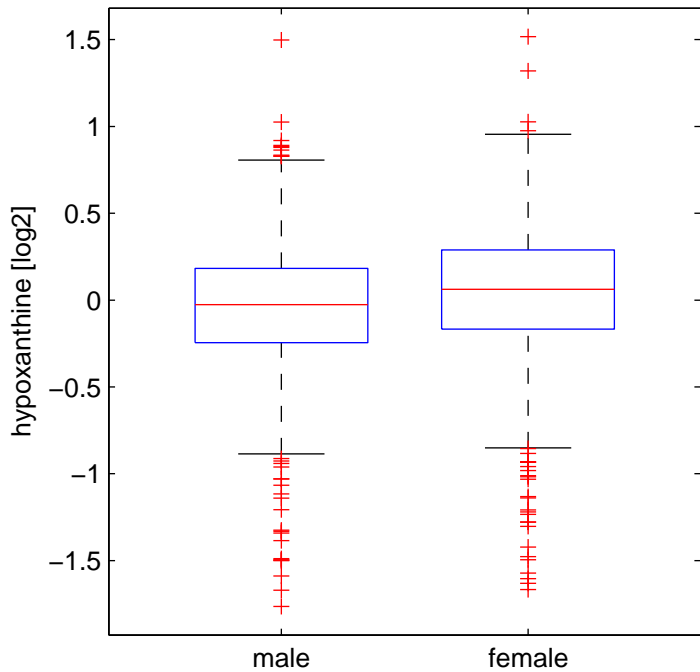

p-val: NaN

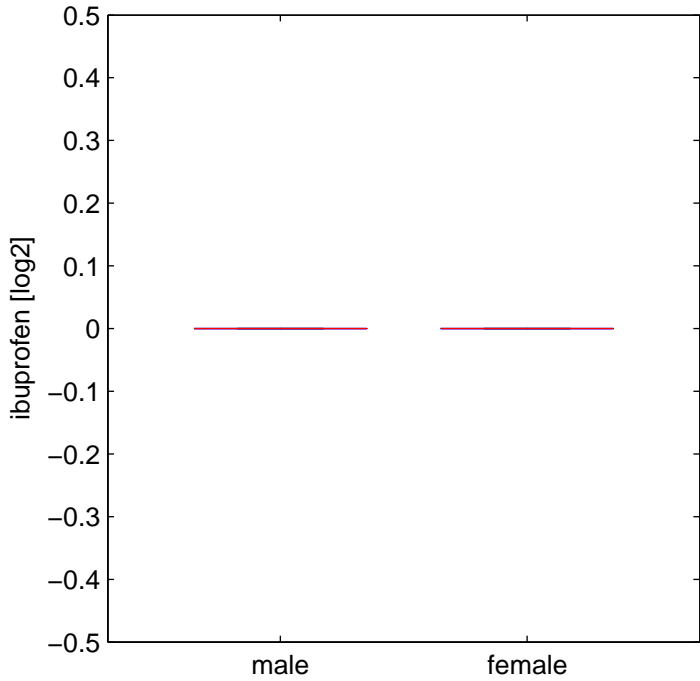

p-val: 2.10e-010

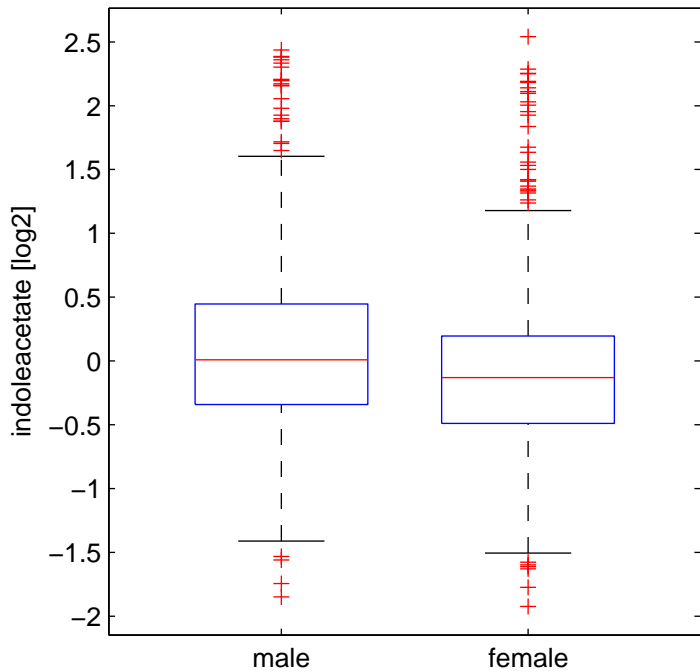

p-val: 1.12e-026

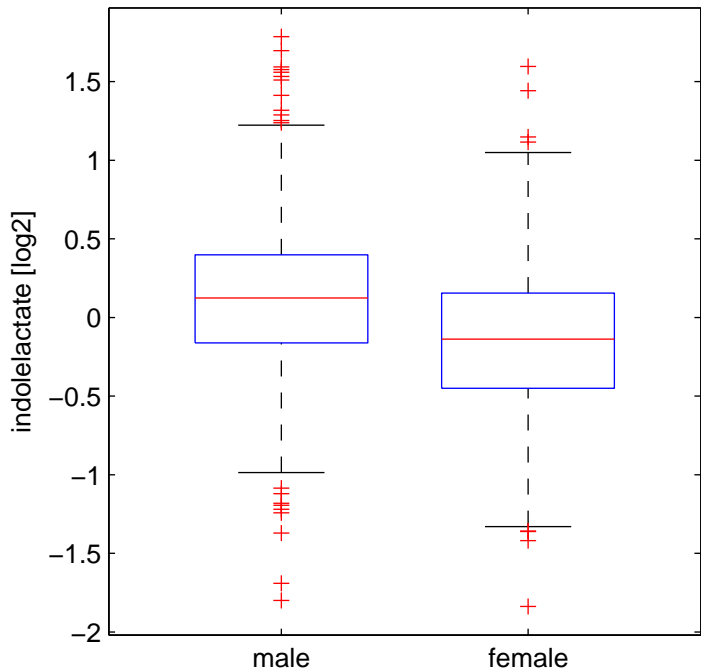

p-val: 1.95e-001

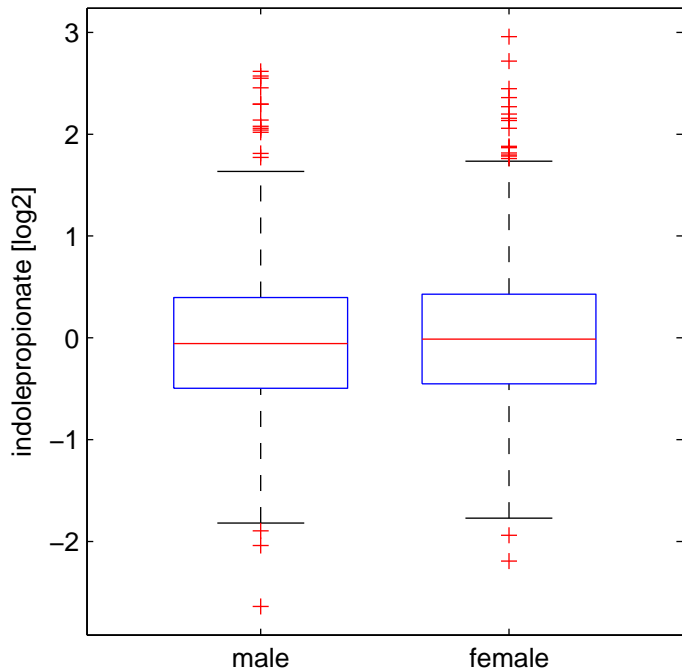



p-val: 7.47e-008

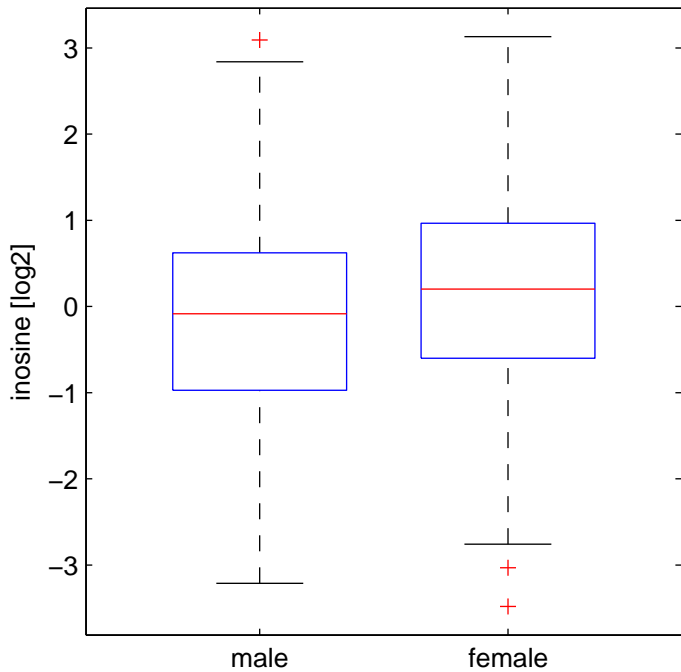

p-val: 1.63e-001

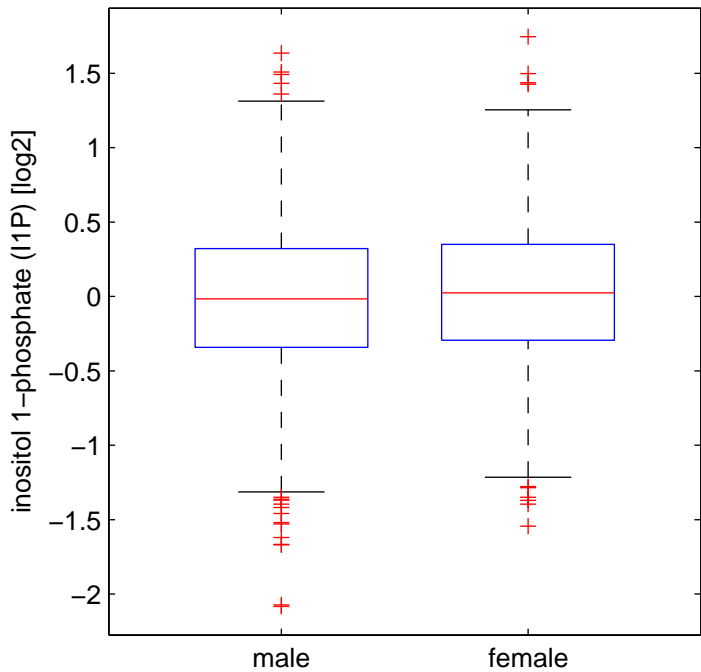

p-val: 3.16e-003

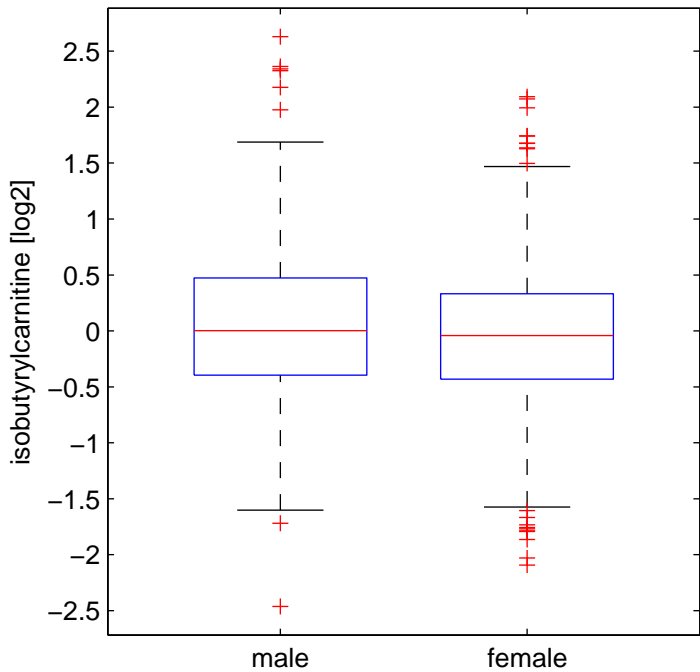

p-val: 4.54e-127

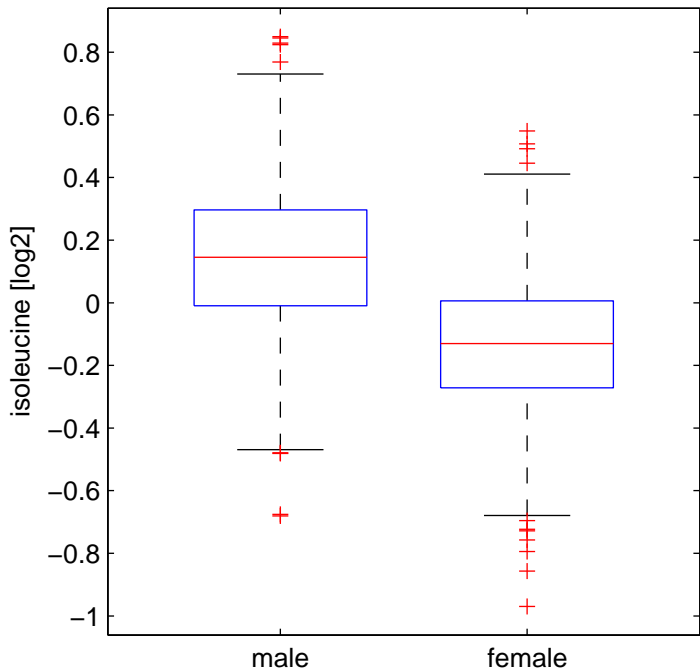

p-val: 1.25e-030

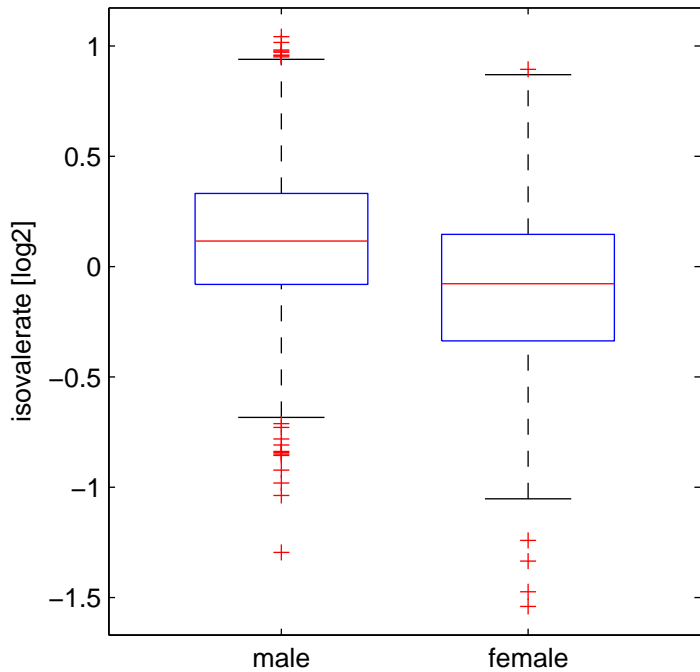

p-val: 8.56e-050

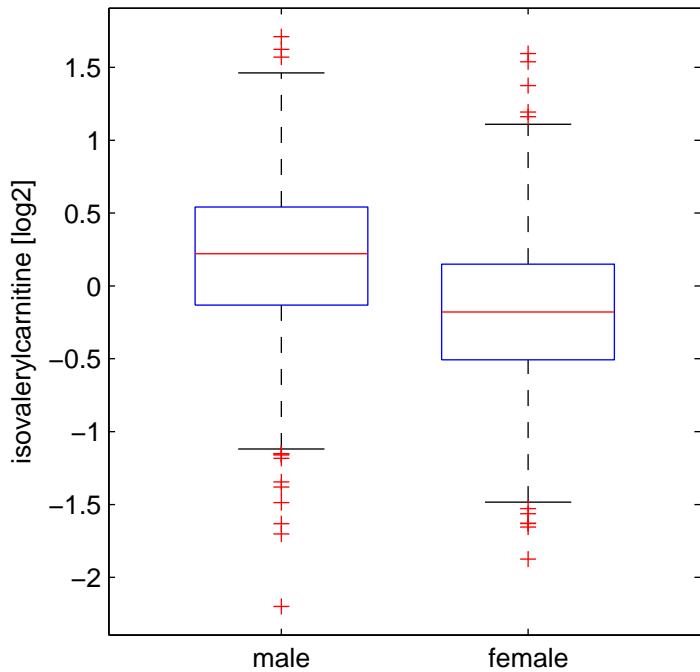

p-val: 1.17e-015

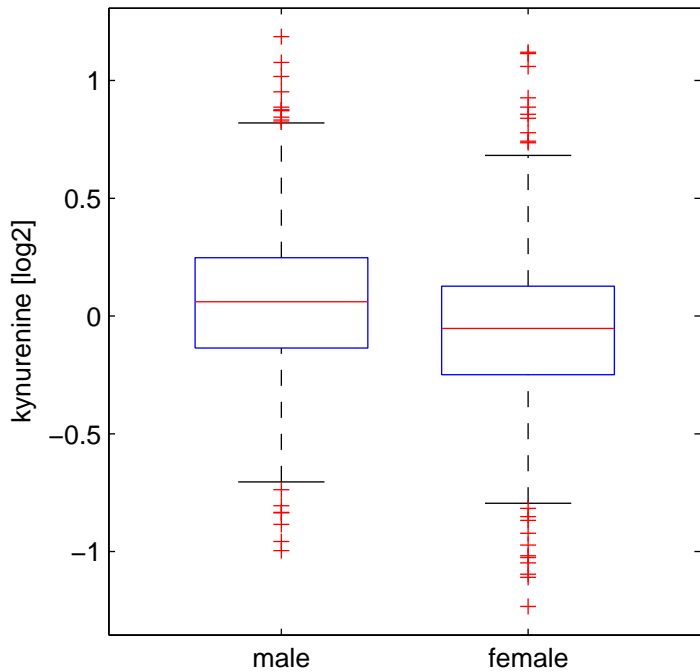

p-val: 4.03e-010

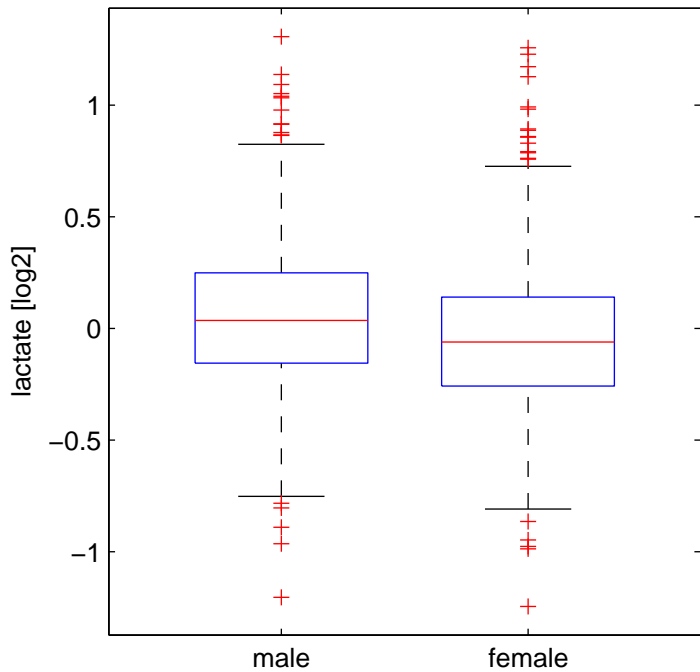



p-val: 4.49e-001

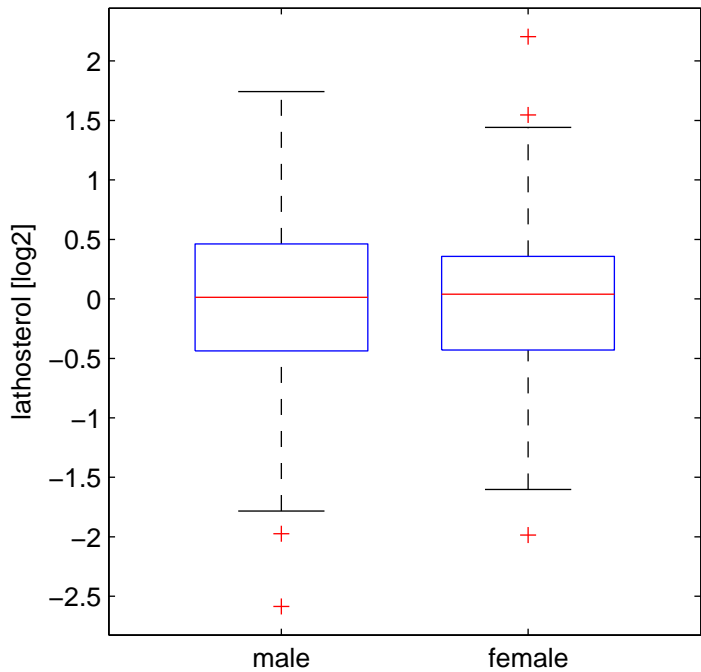

p-val: 4.48e-020

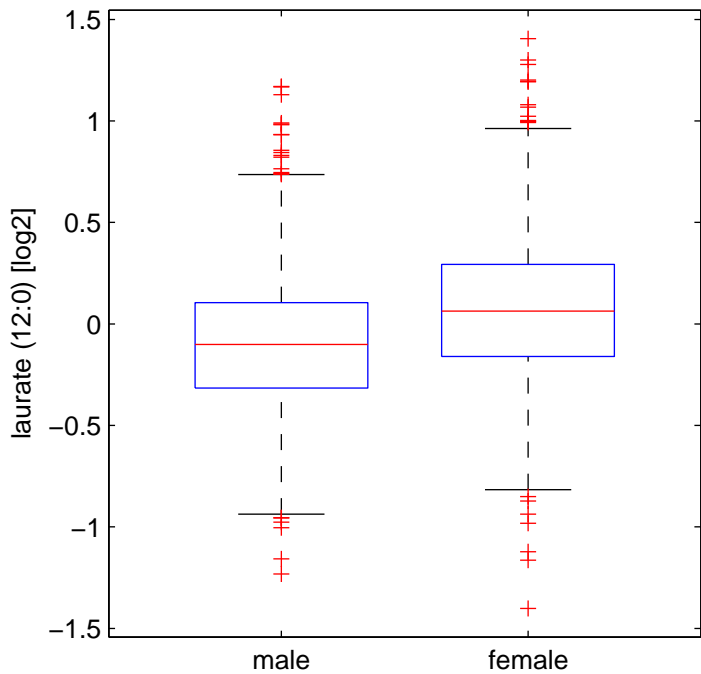

p-val: 7.35e-009

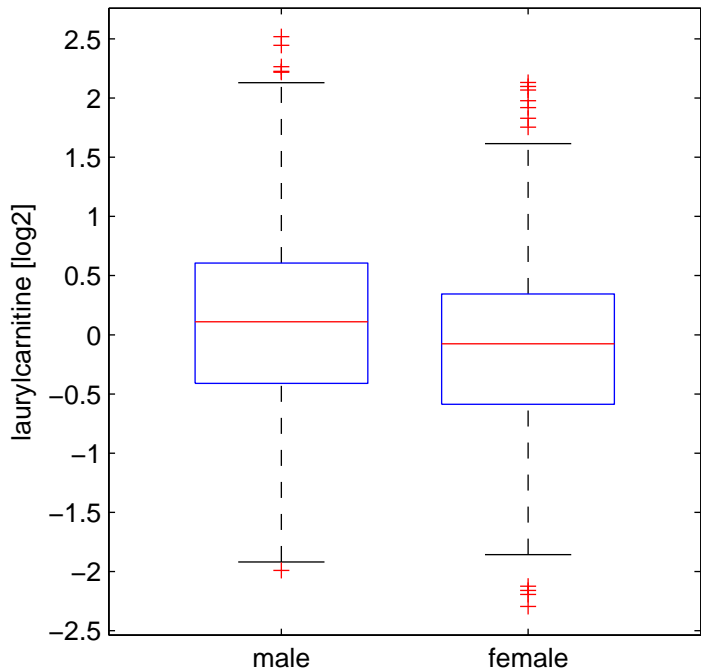

p-val: 2.79e-123

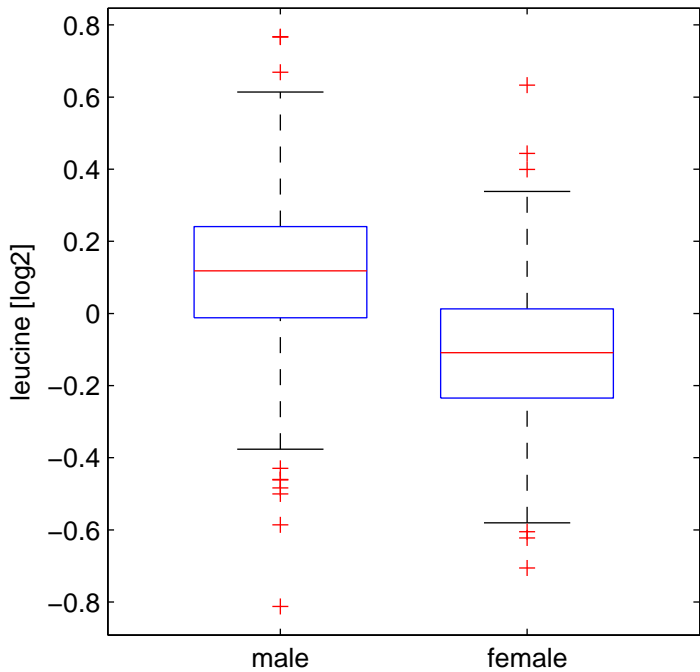

p-val: 7.63e-001

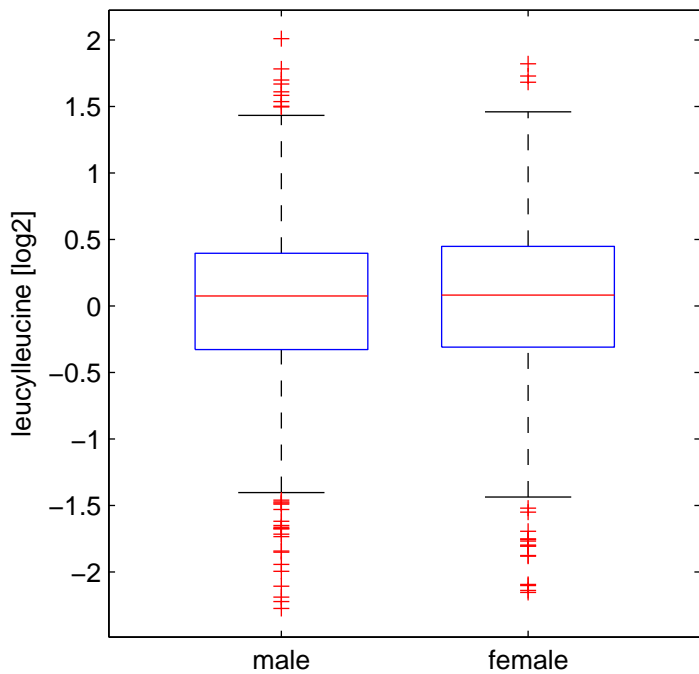

p-val: 9.29e-004

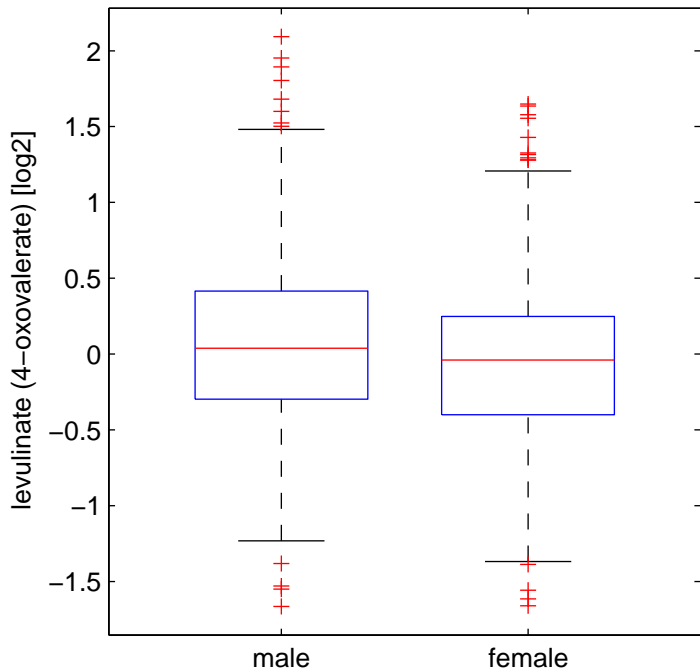

p-val: 8.15e-002

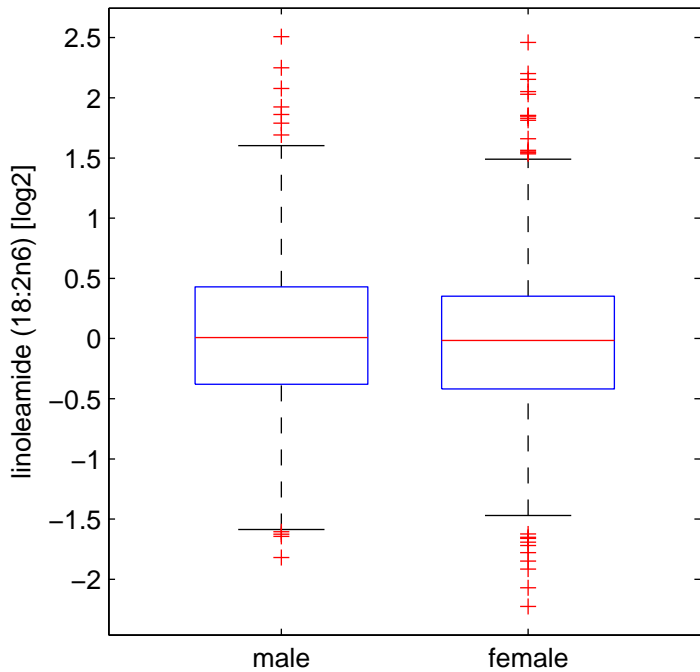

p-val: 2.46e-019

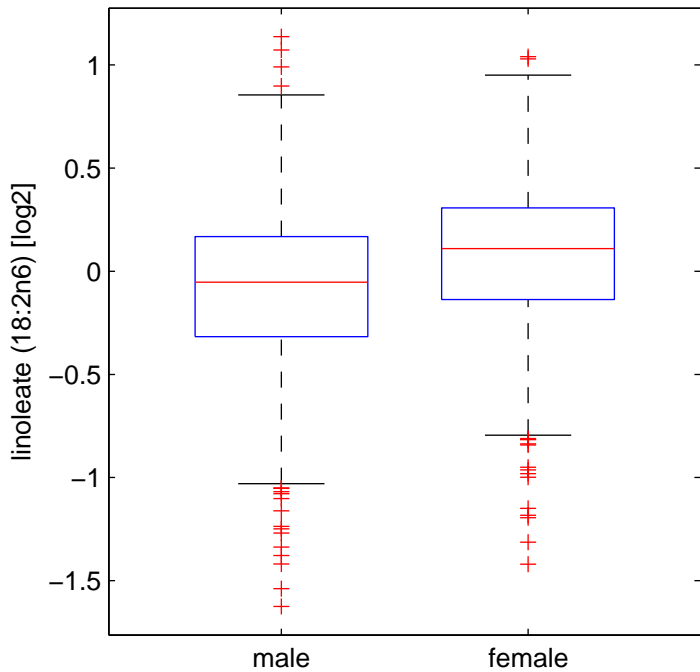



p-val: 1.41e-013

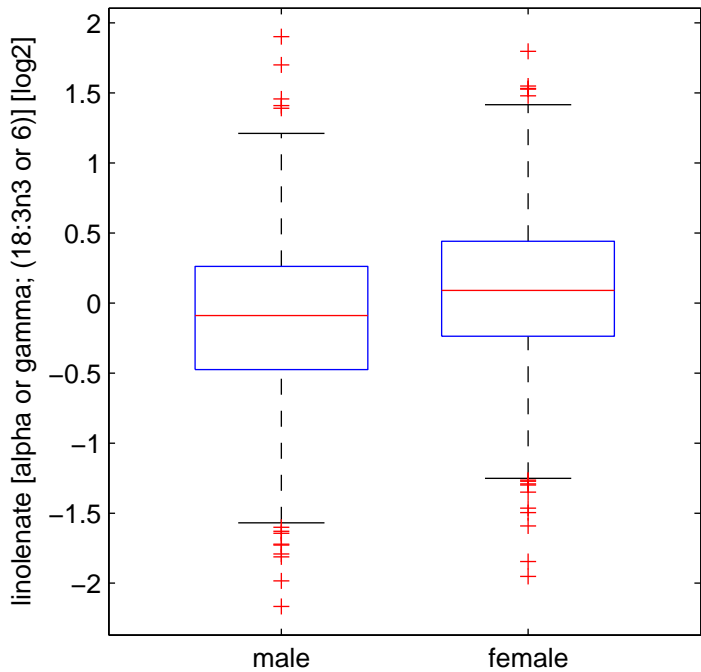

p-val: 1.60e-003

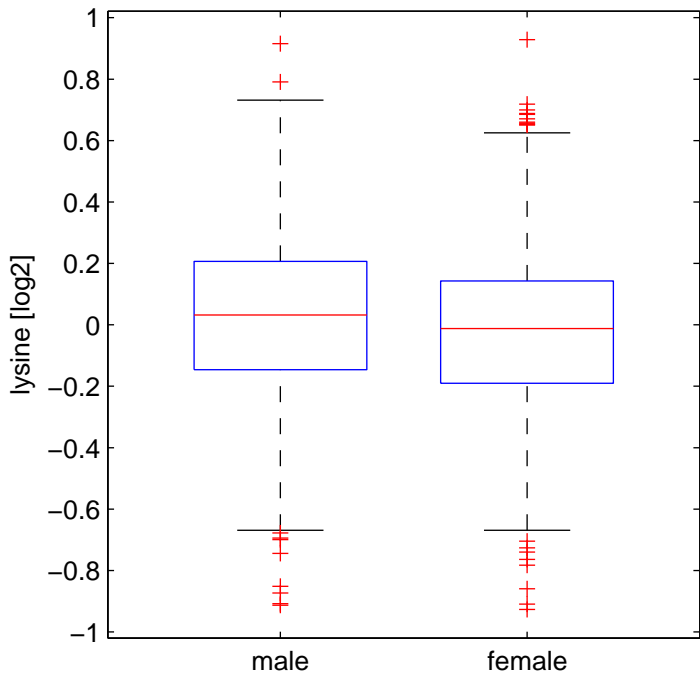

p-val: 3.29e-005

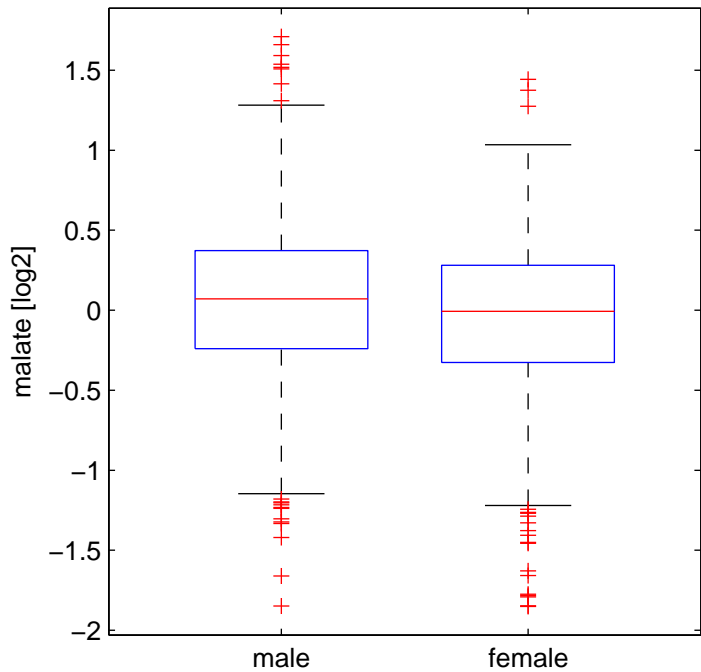

p-val: 5.96e-004

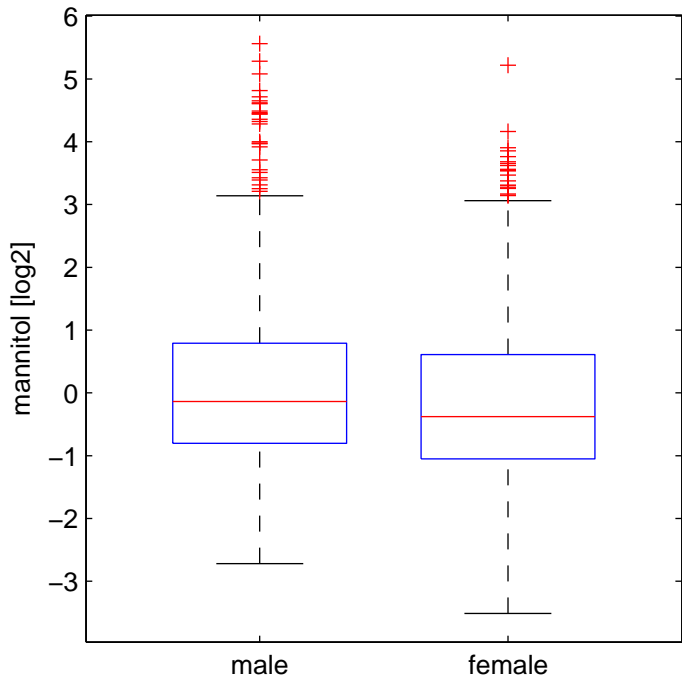

p-val:  $8.57e-016$

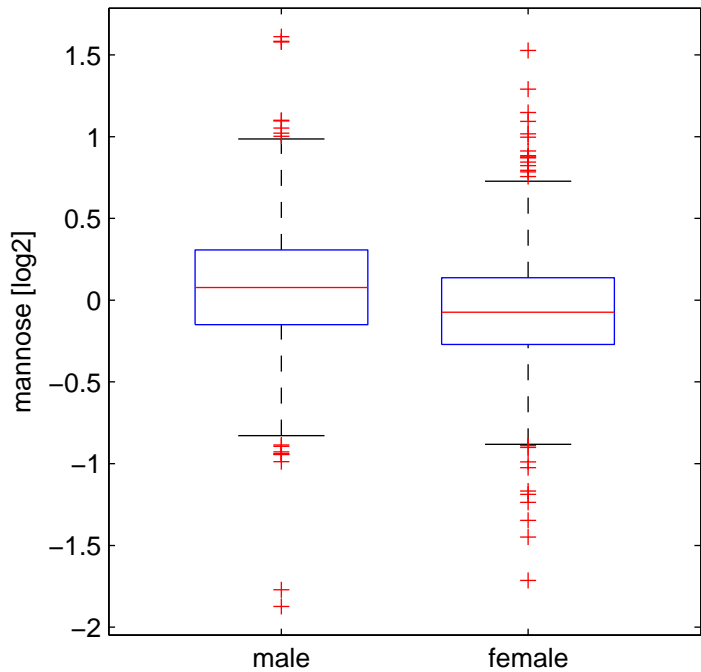

p-val: 7.92e-010

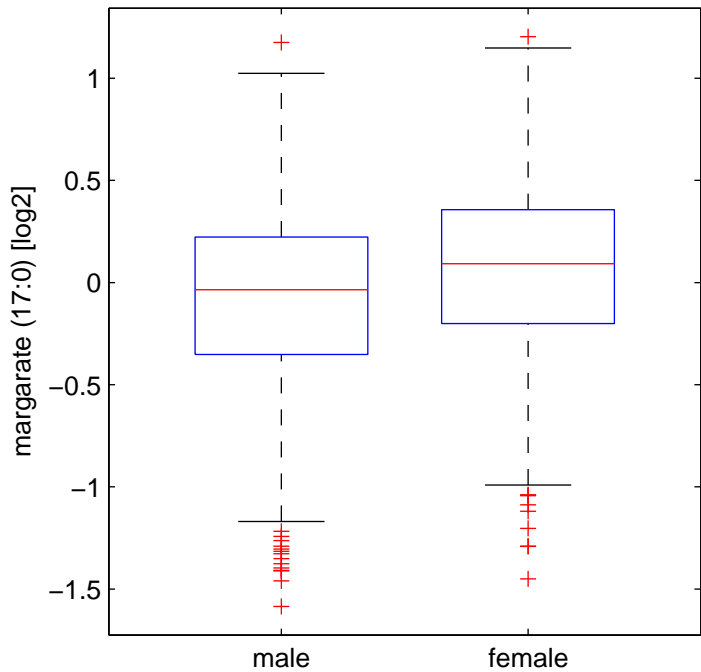

p-val: 5.37e-055

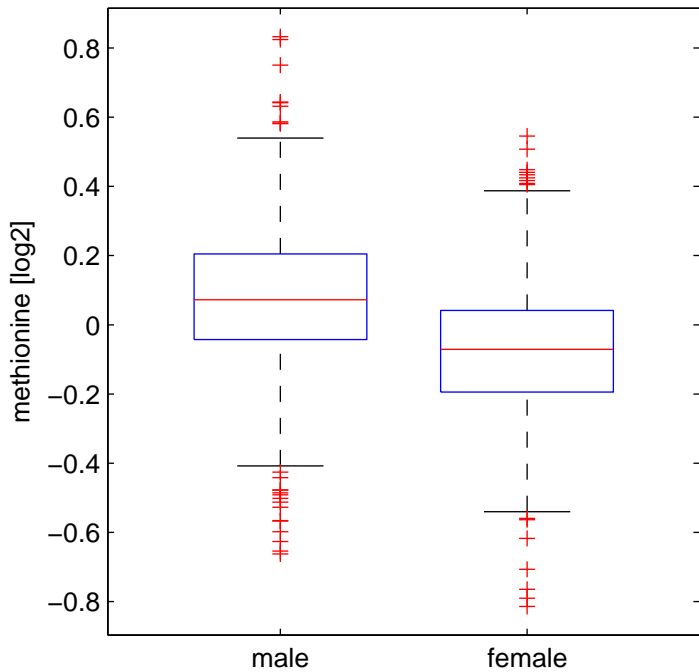

p-val: 8.89e-001

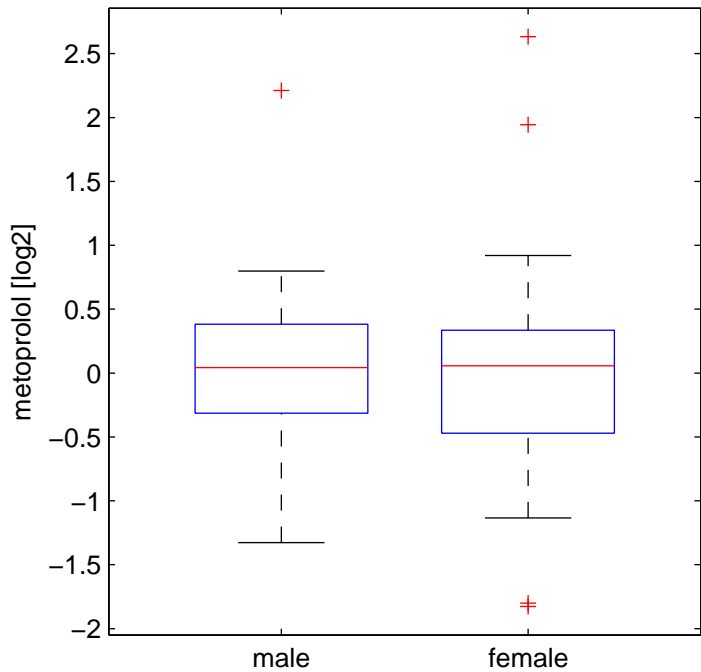



p-val: 1.80e-001

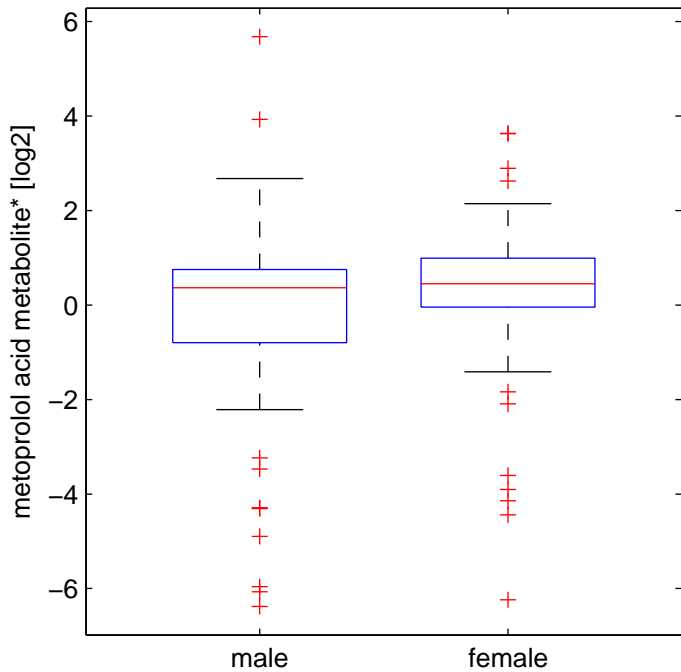

p-val: 3.76e-005

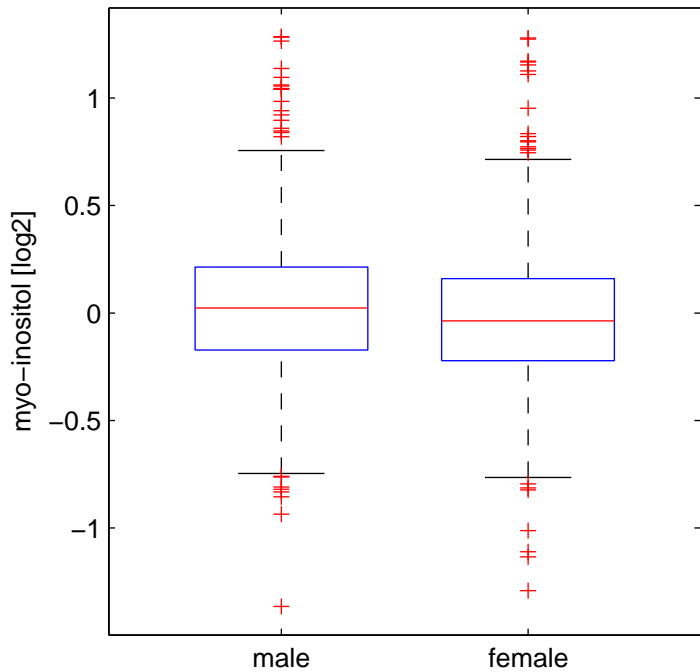

p-val: 5.65e-026

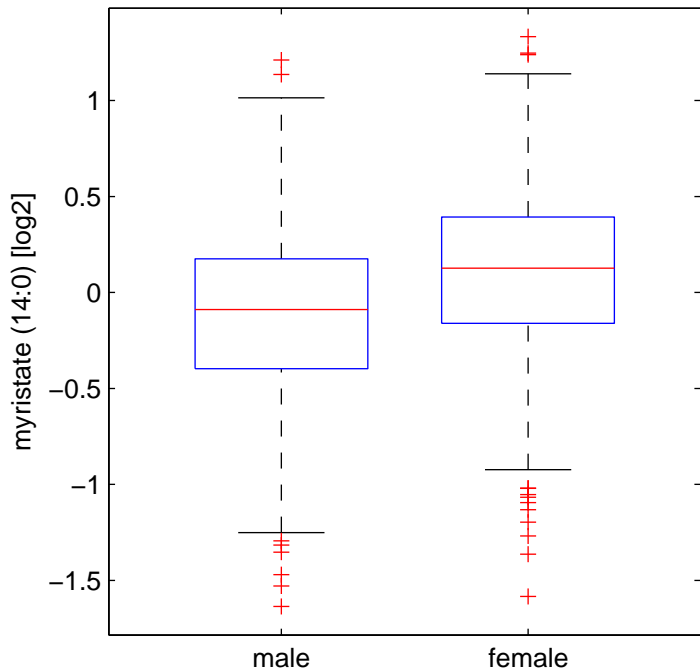

p-val: 3.64e-070

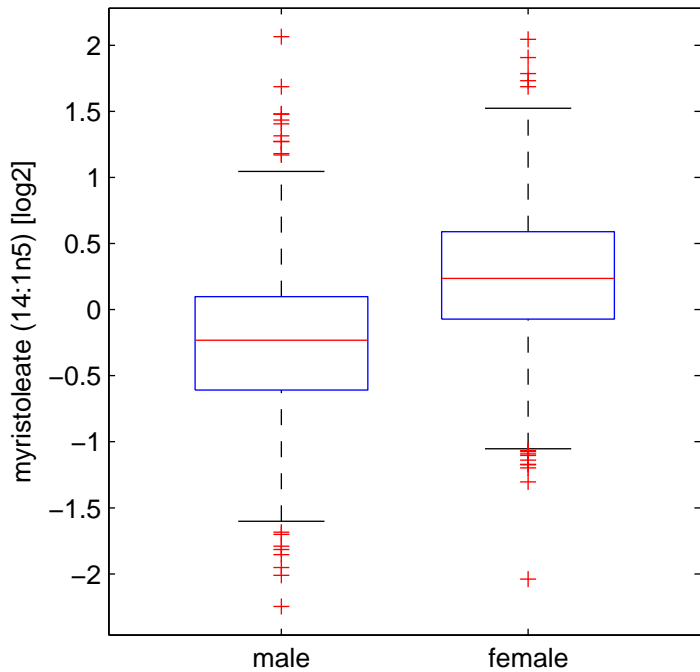

p-val: 8.87e-001

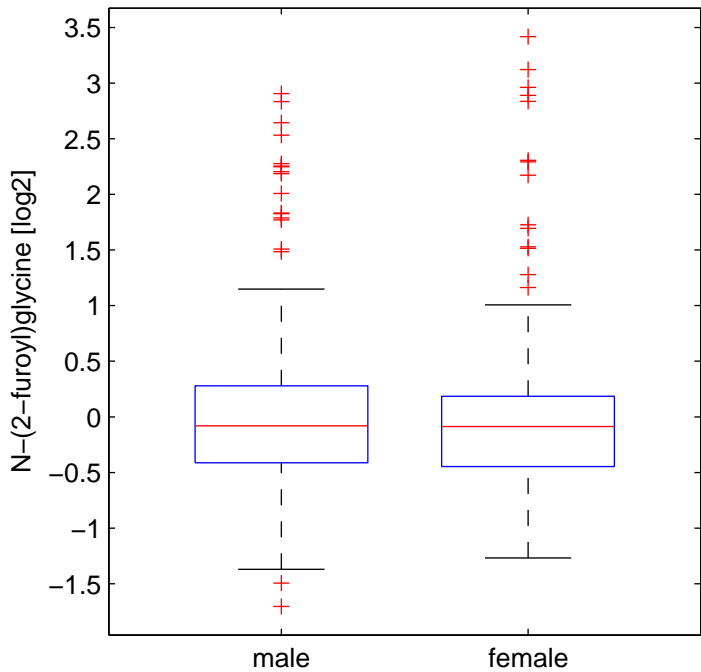

p-val: 2.80e-002

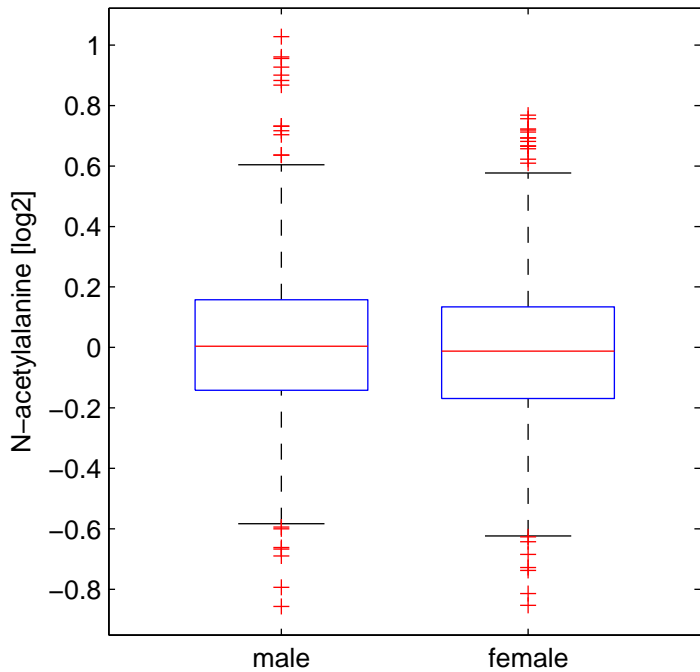

p-val: 2.65e-014

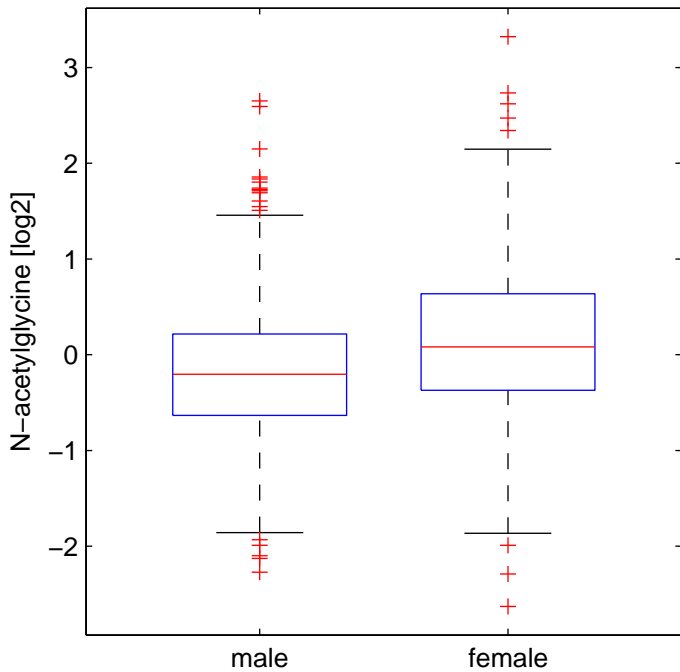

p-val: 8.54e-001

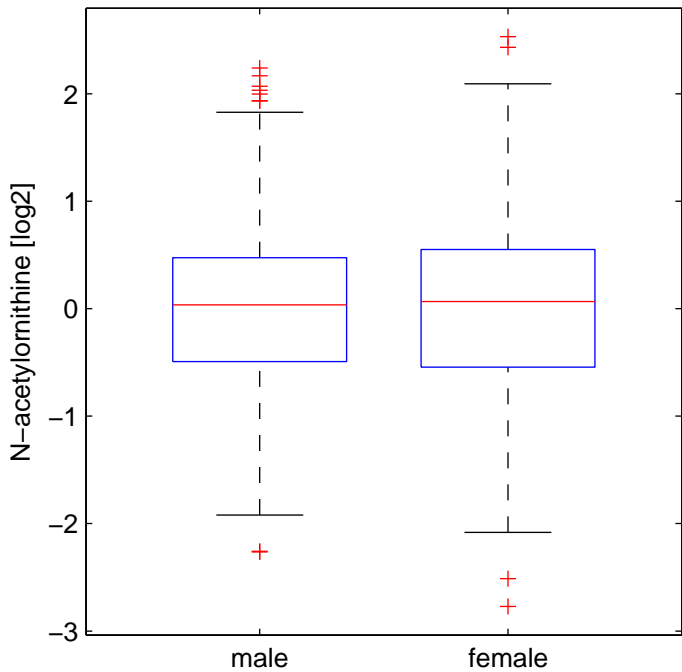



p-val: 3.37e-003

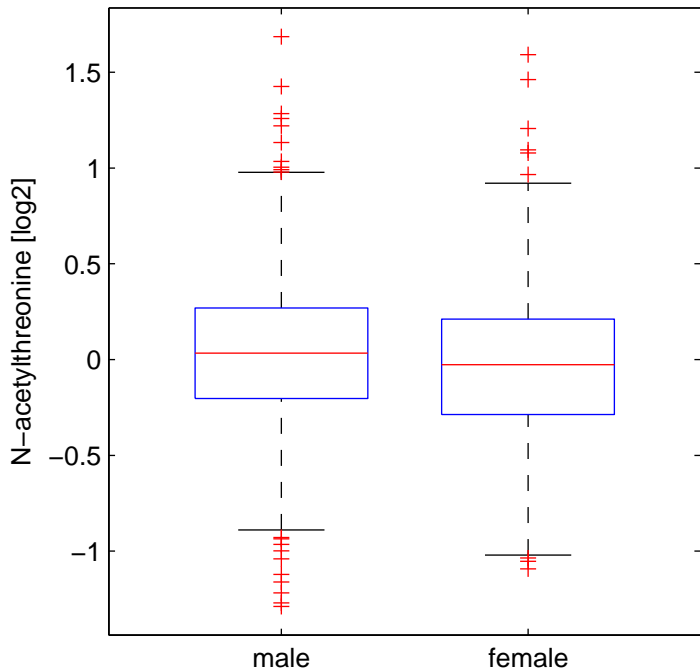

p-val: 7.71e-001

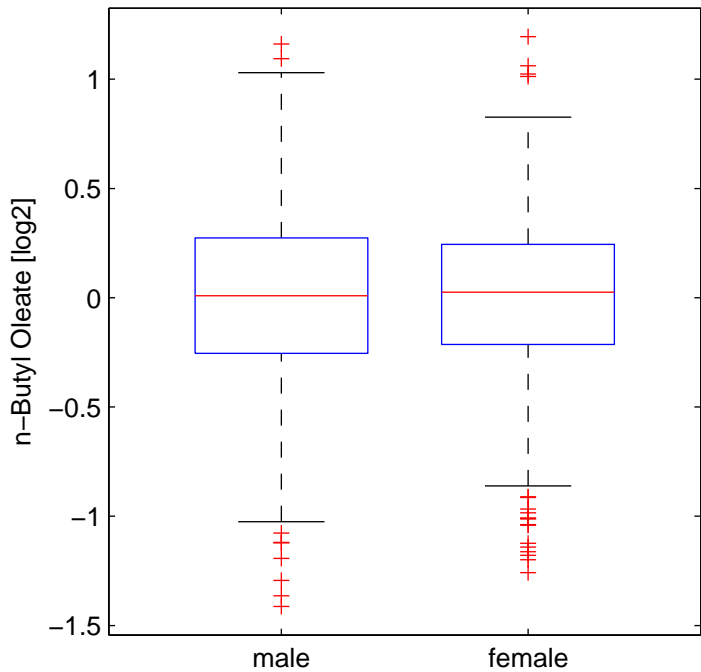

p-val: 7.40e-002

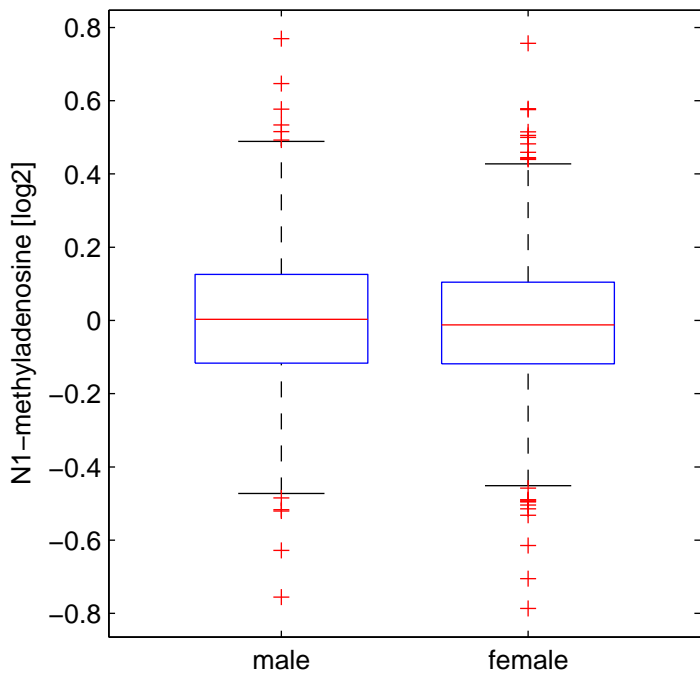

p-val: 3.72e-001

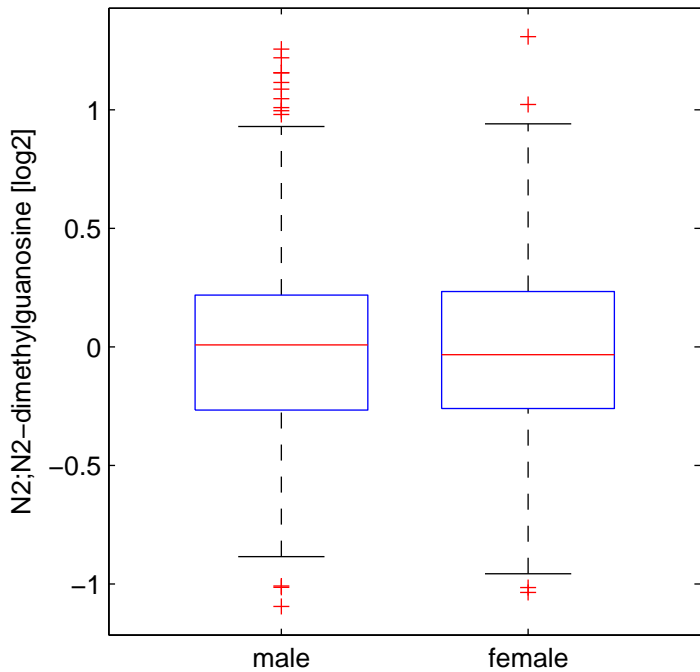

p-val: 1.49e-001

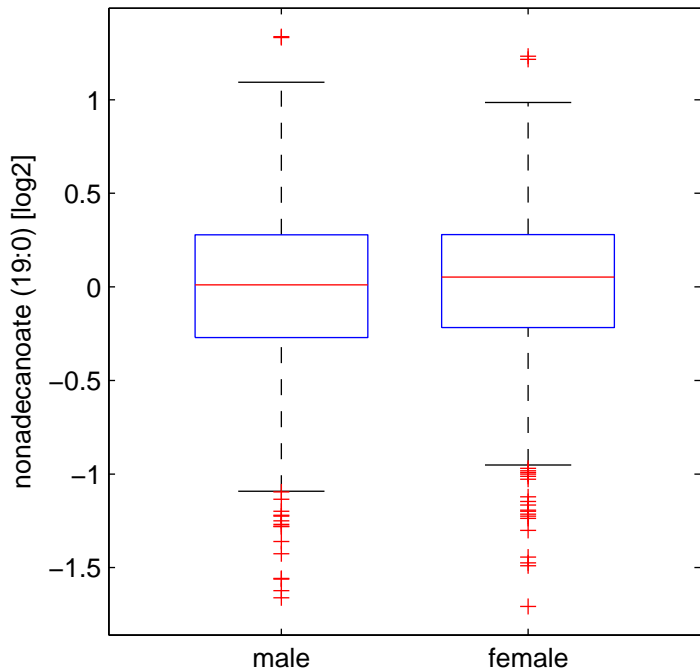

p-val: 5.07e-004

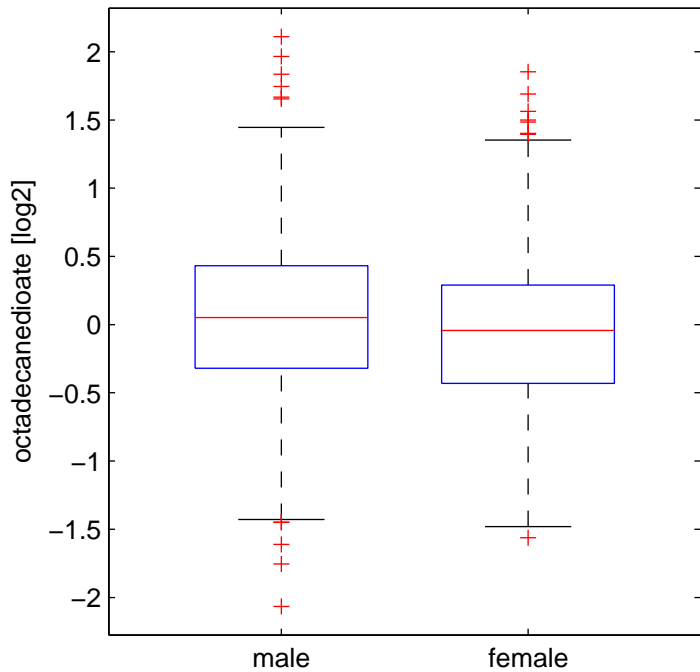

p-val: 7.09e-004

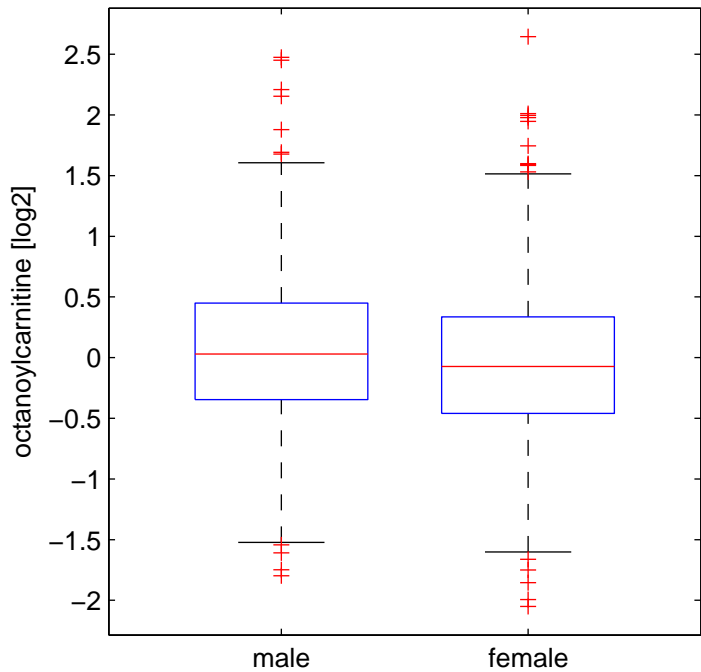

p-val: 5.48e-004

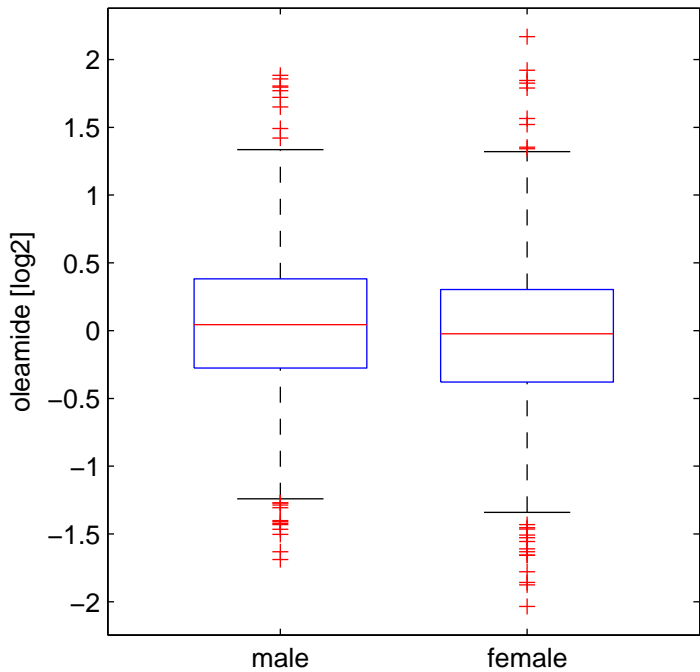



p-val: 7.06e-010

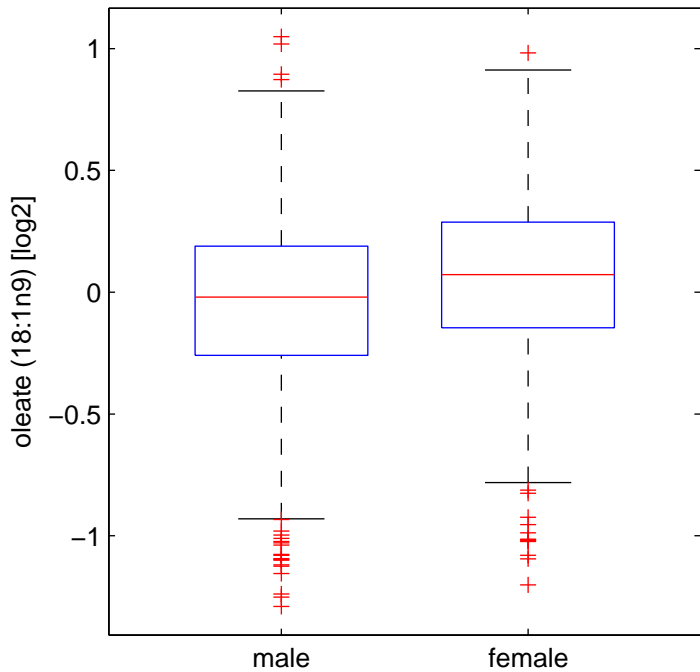

p-val: 7.53e-009

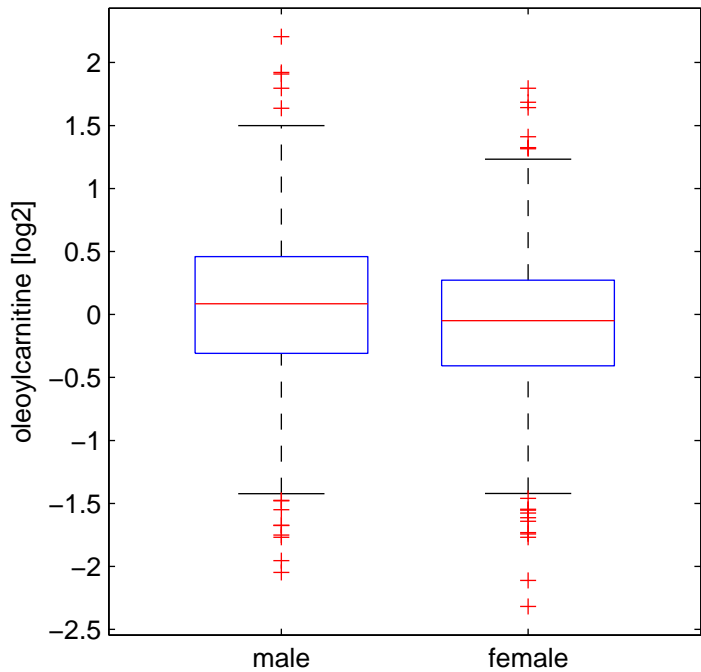

p-val: 2.03e-003

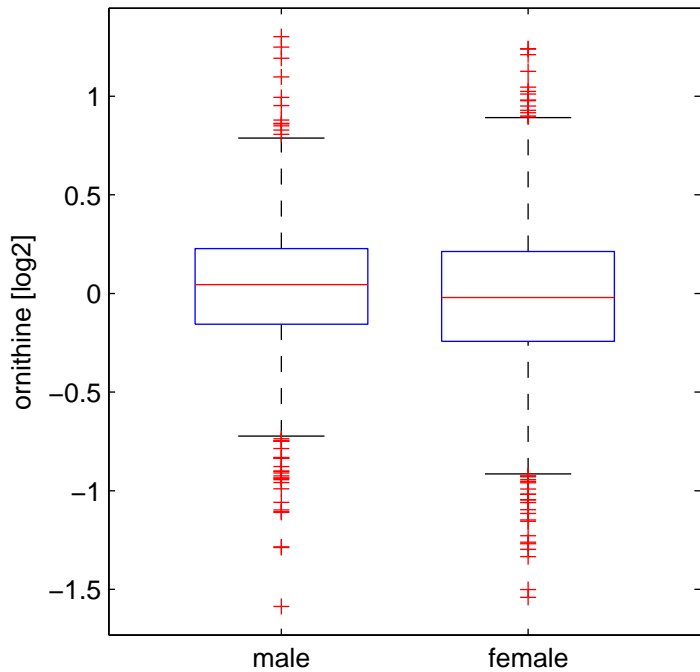

p-val: 6.18e-001

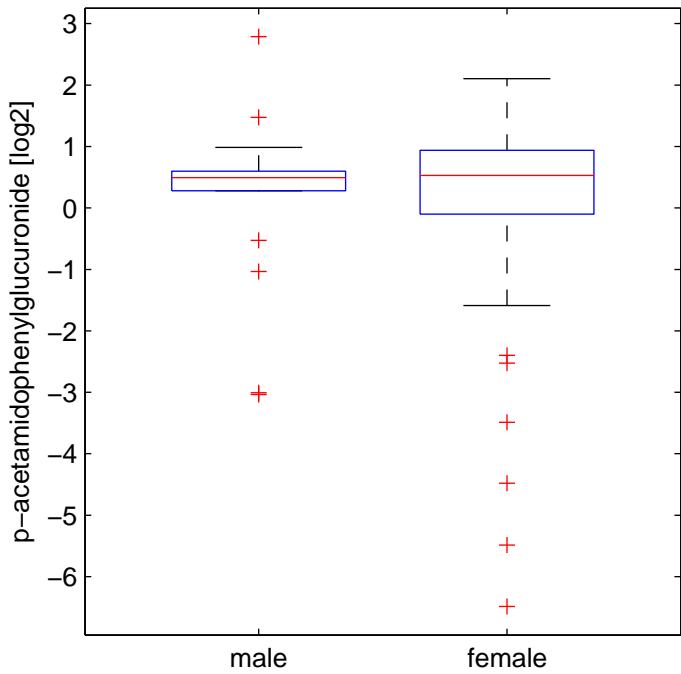

p-val: 8.92e-001

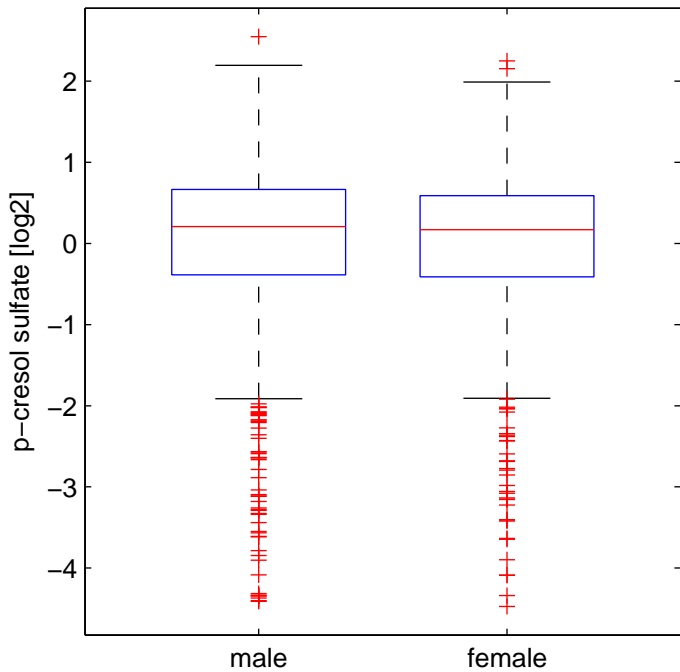

p-val: 3.49e-003

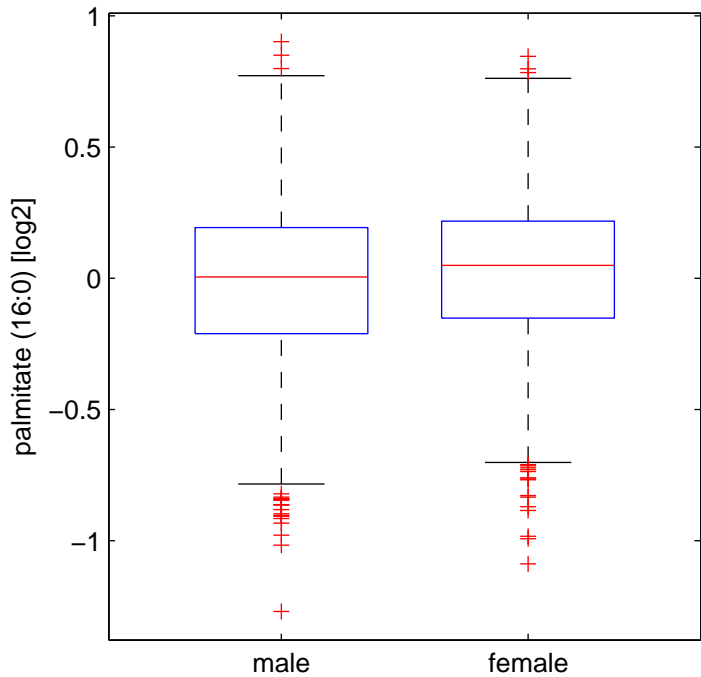

p-val: 8.21e-033

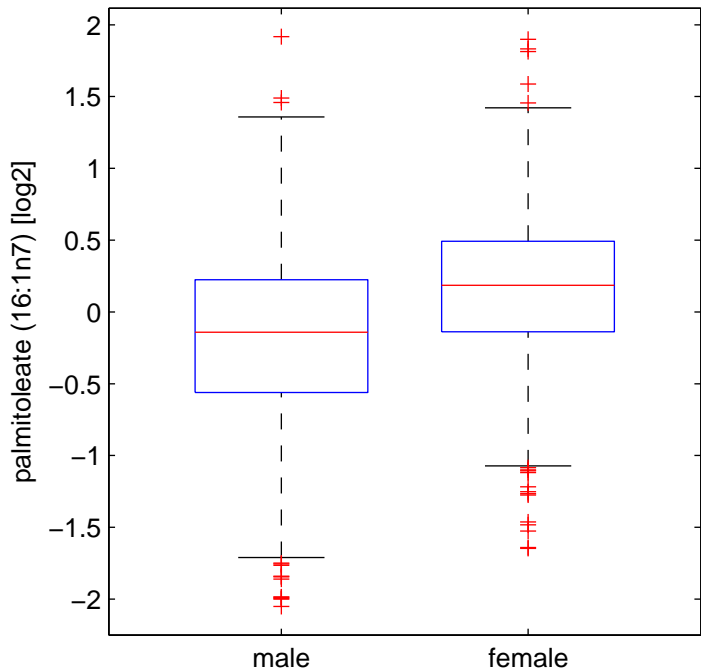

p-val: 4.93e-013

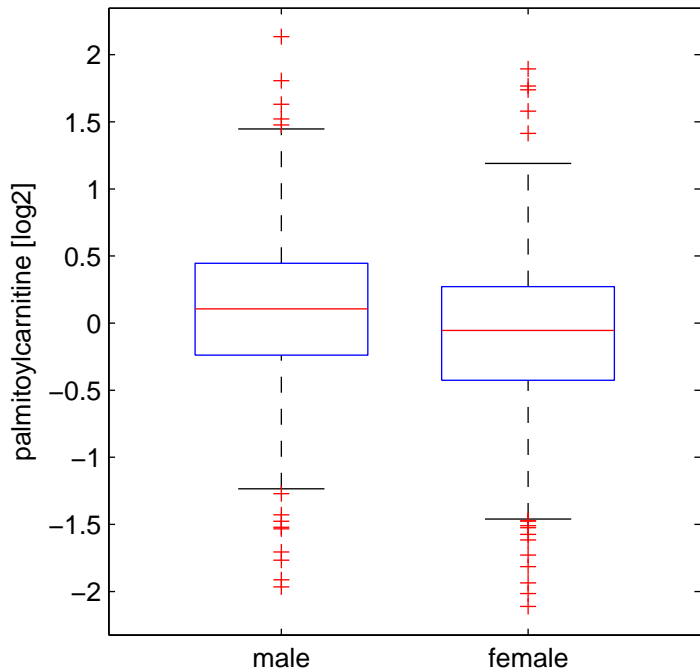



p-val: 9.64e-001

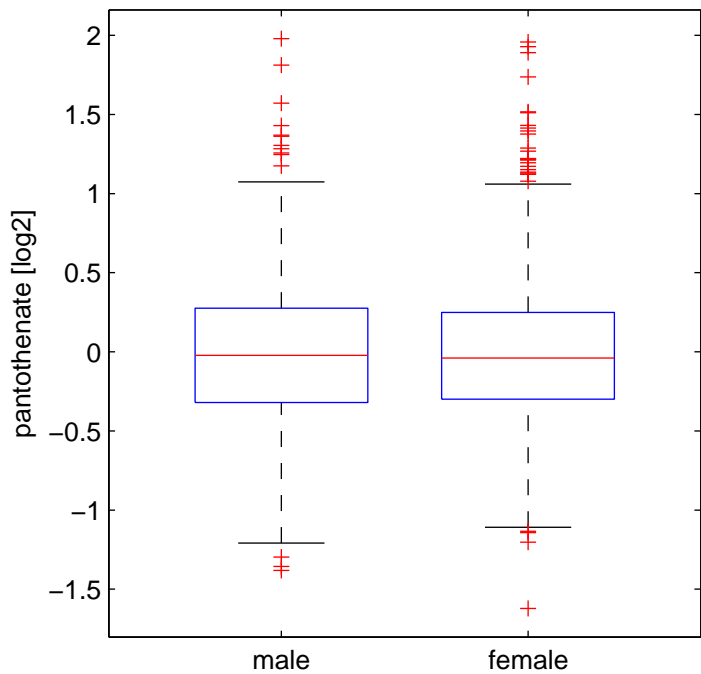

p-val: 4.33e-001

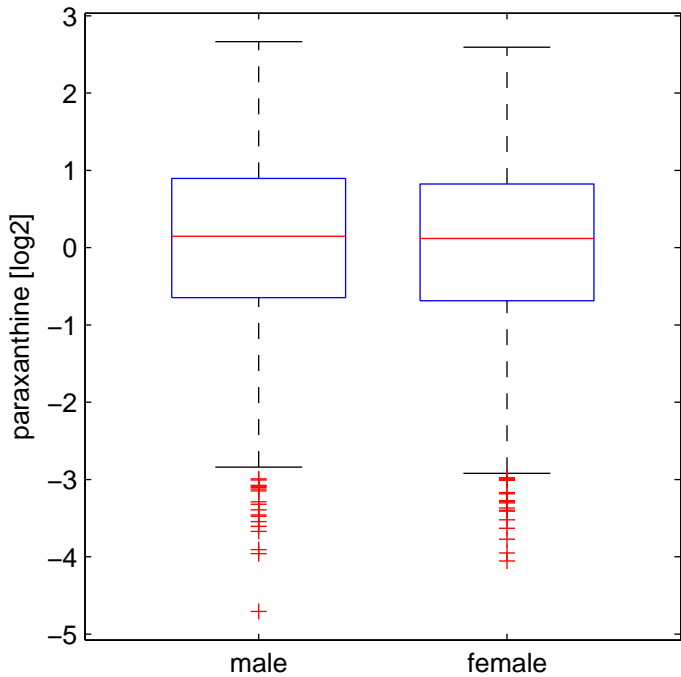

p-val: 2.67e-004

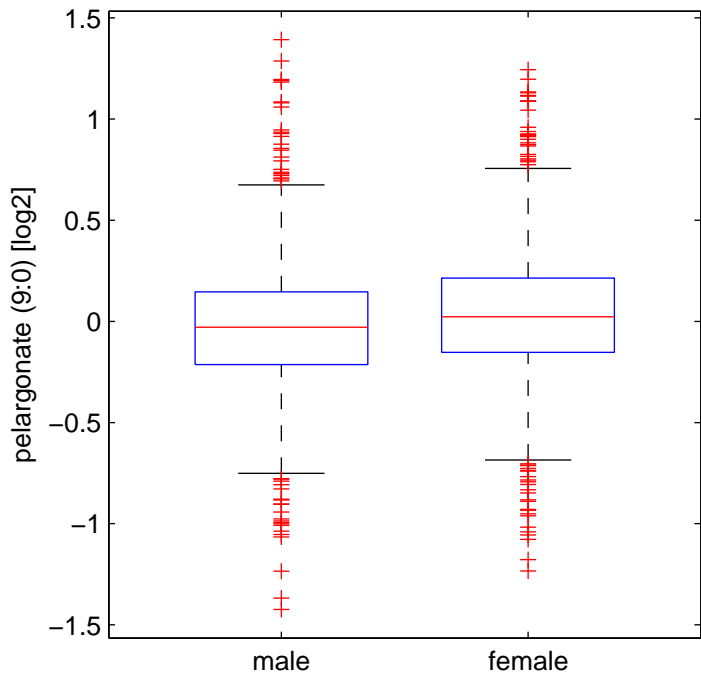

p-val: 4.45e-022

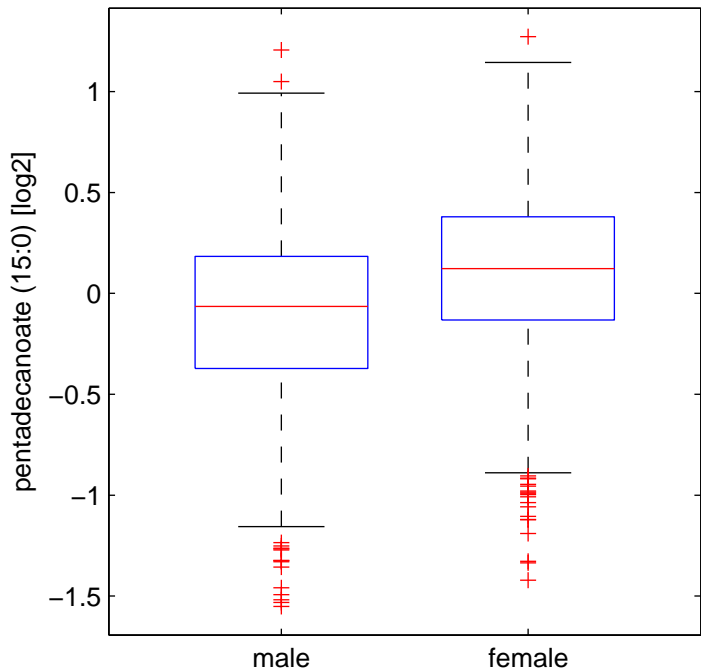

p-val: 7.09e-006

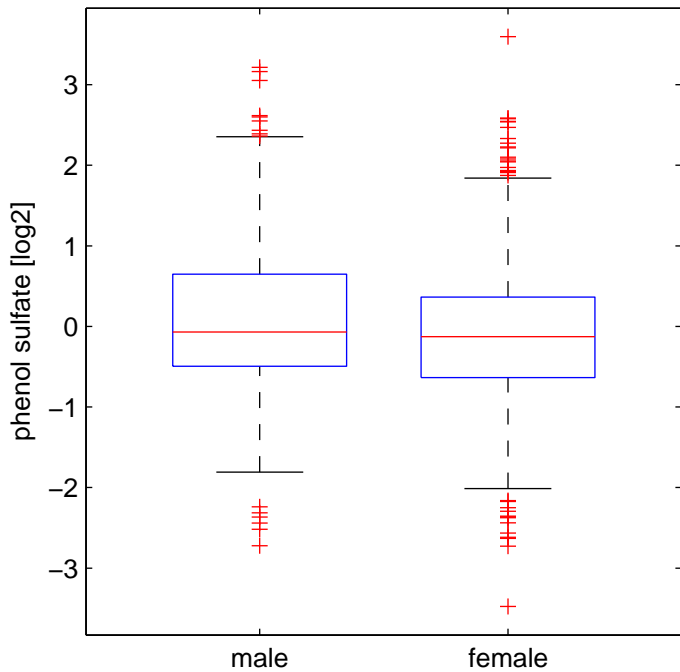

p-val: 1.02e-001

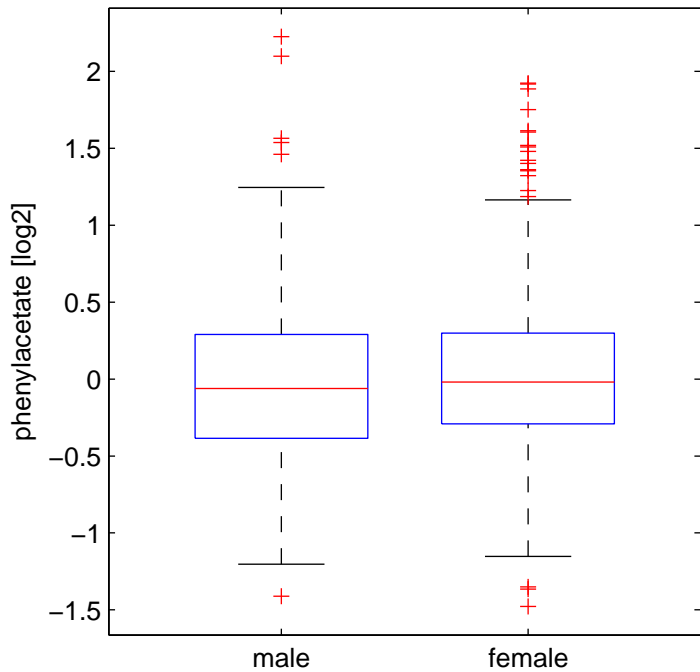

p-val: 2.65e-001

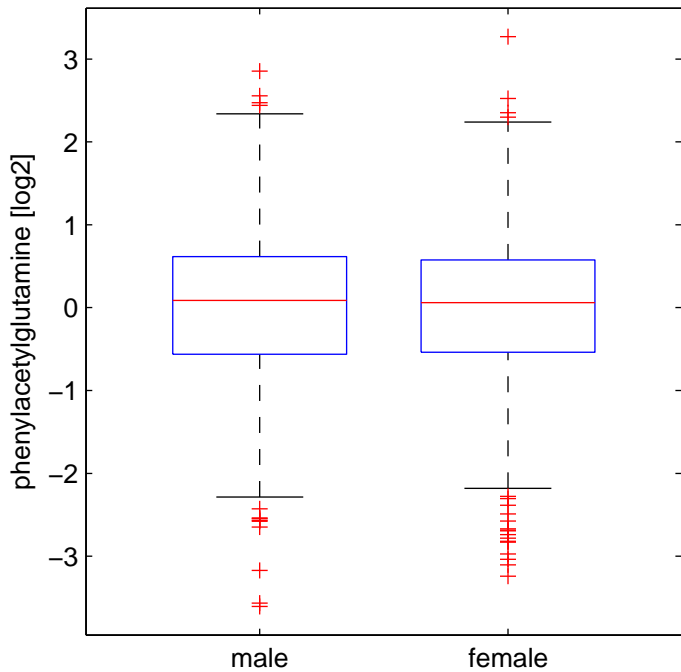

p-val: 3.72e-023

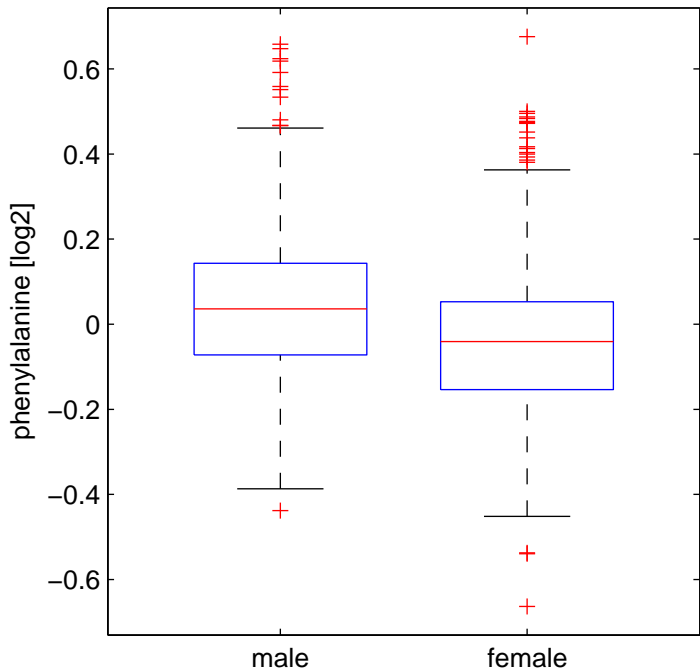



p-val: 1.41e-021

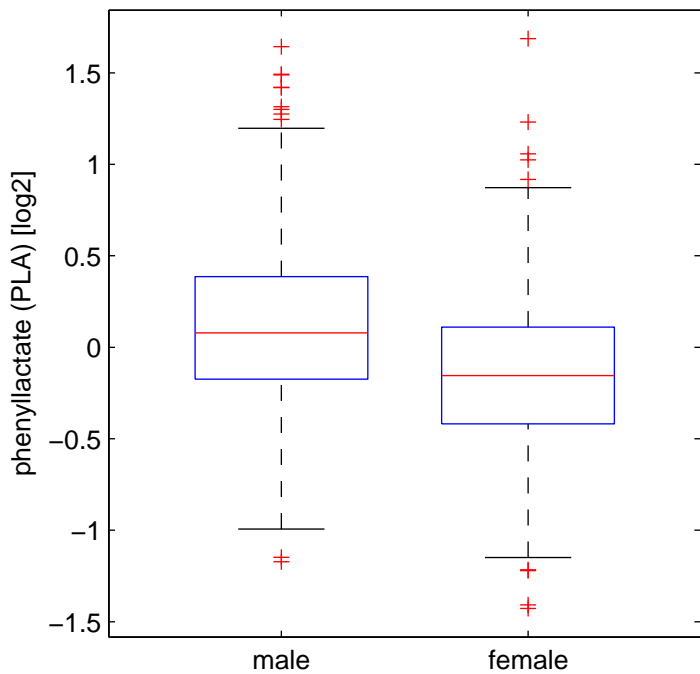

p-val: 4.46e-045

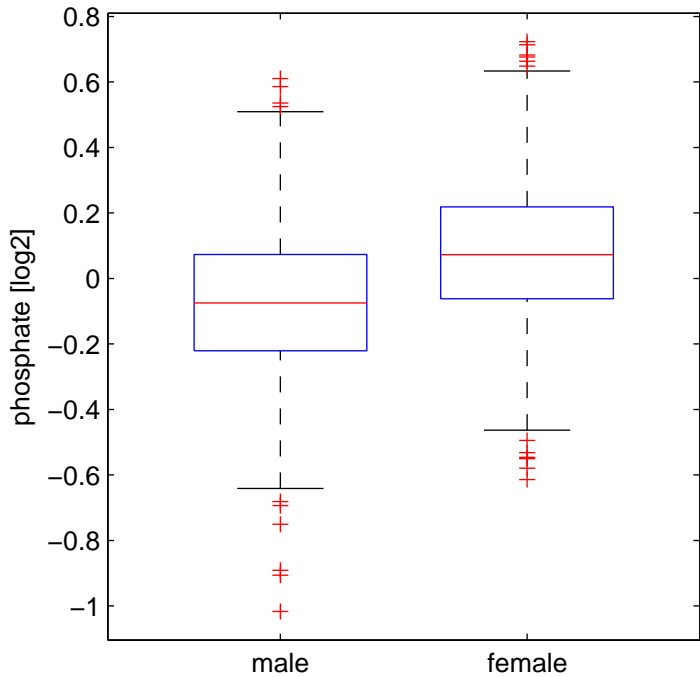

p-val: 2.99e-016

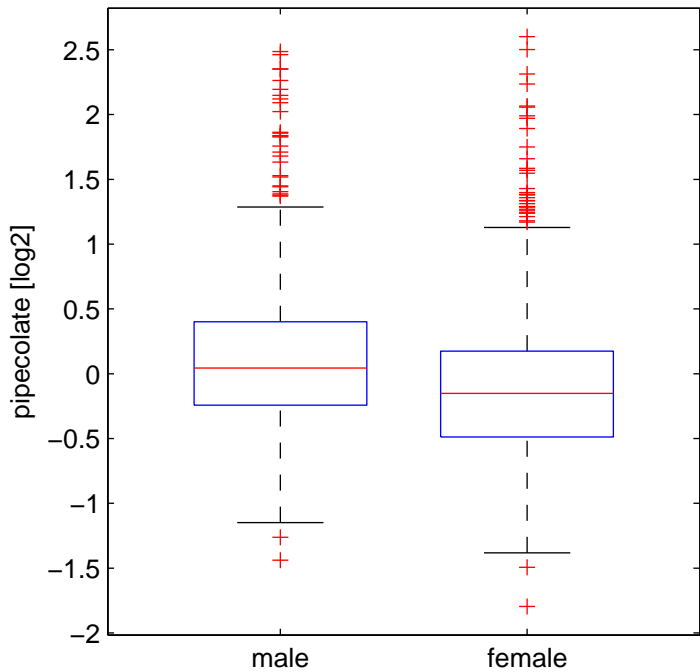

p-val: 1.46e-011

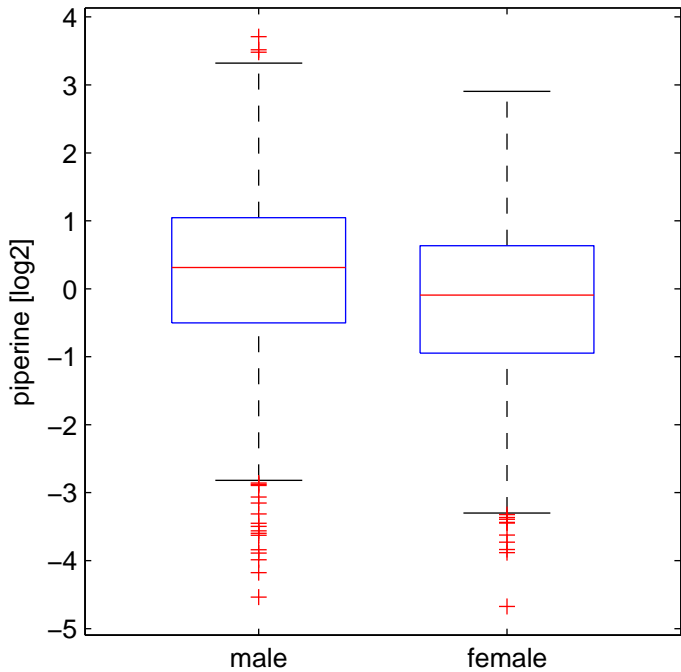

p-val: 4.10e-008

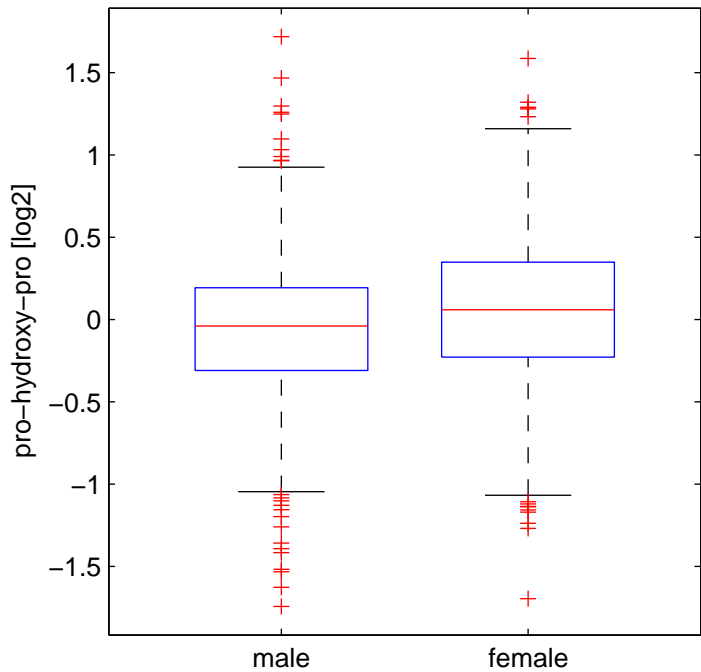

p-val: 1.78e-036

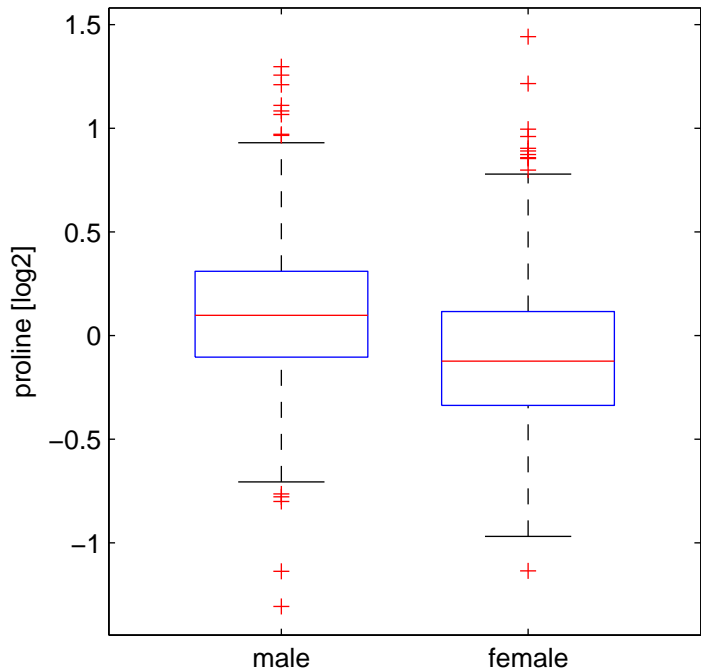

p-val: 1.93e-023

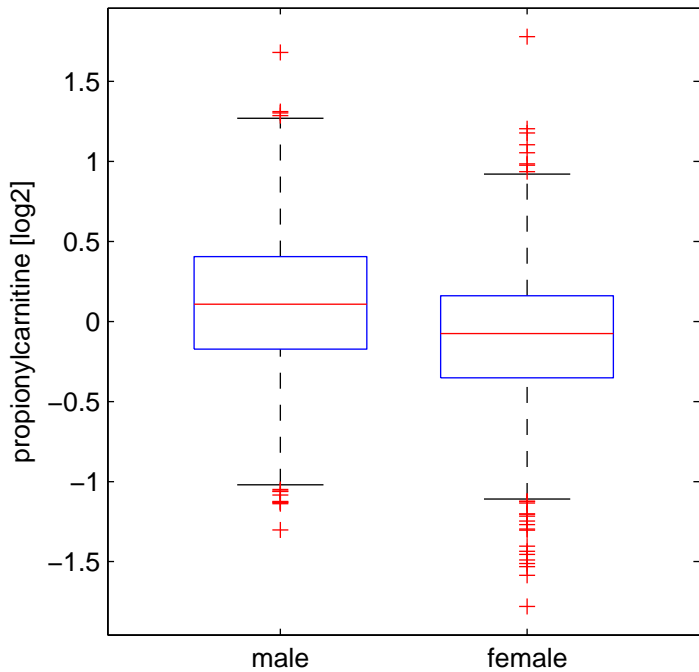

p-val: 8.47e-005

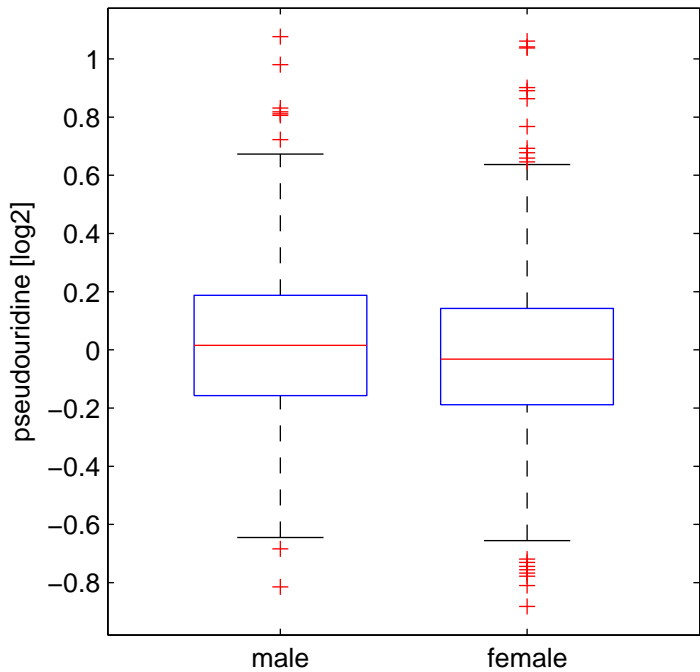



p-val: 7.09e-013

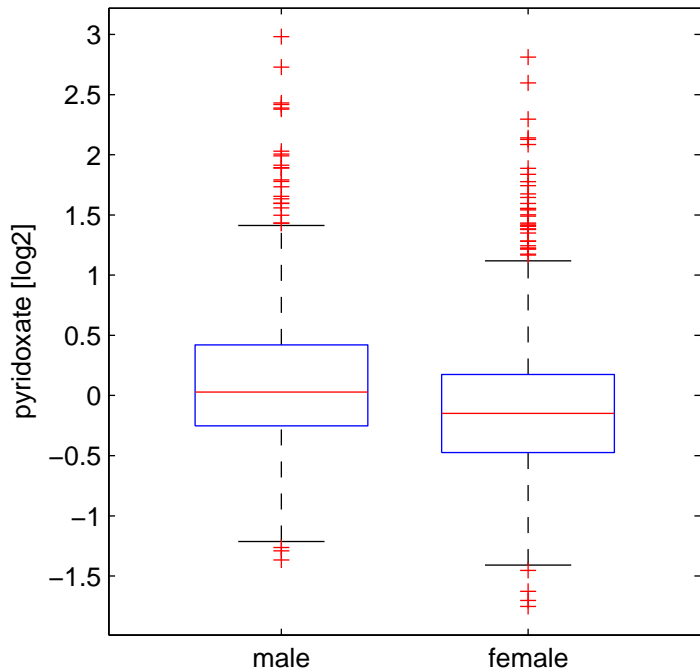

p-val: 6.21e-152

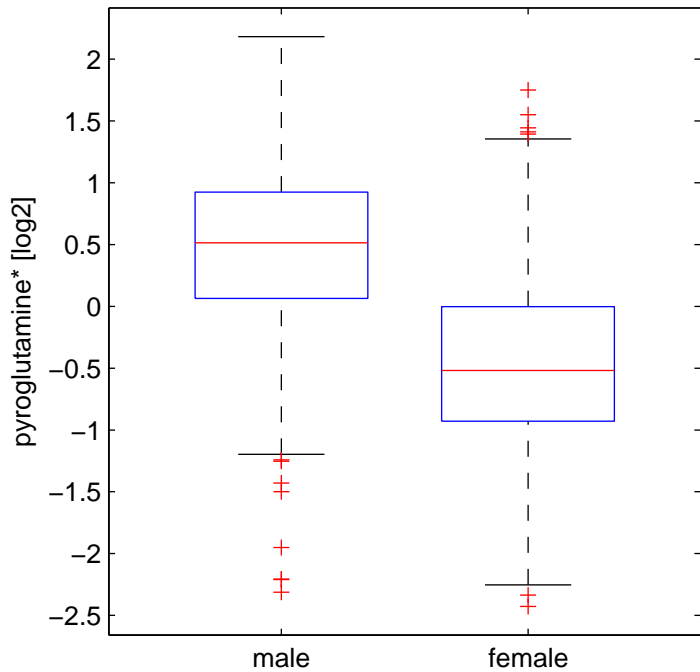

p-val: 7.40e-001

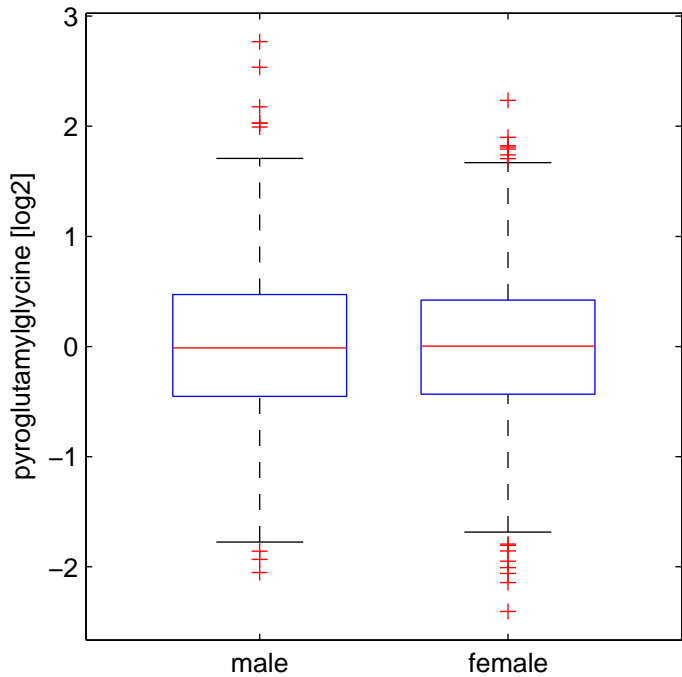

p-val: 4.55e-001

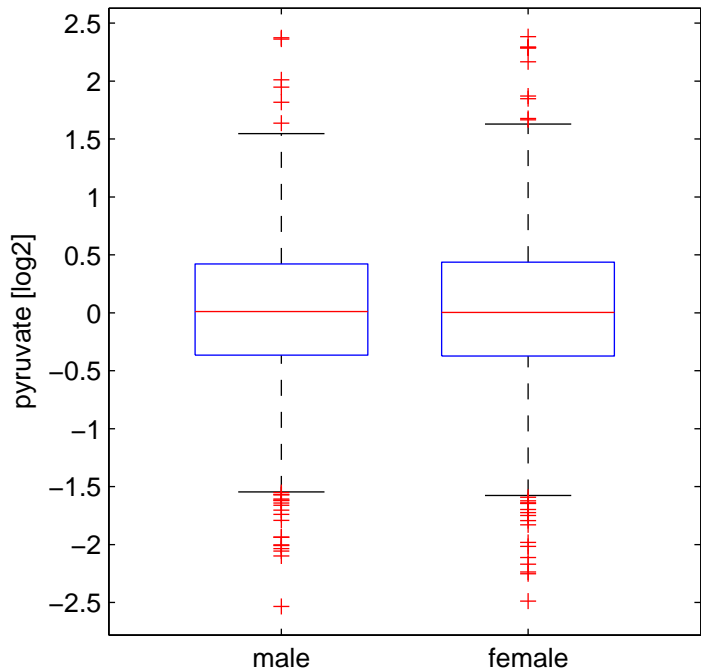

p-val: 1.16e-002

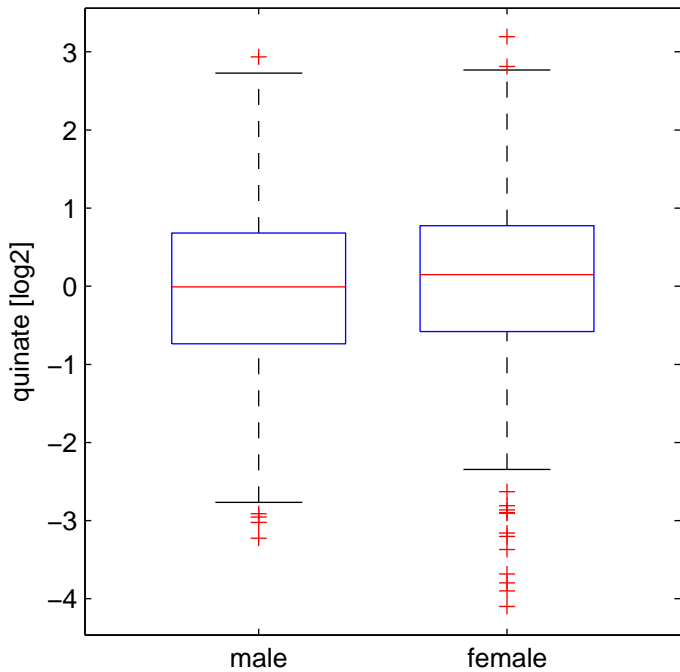

p-val: 1.54e-001

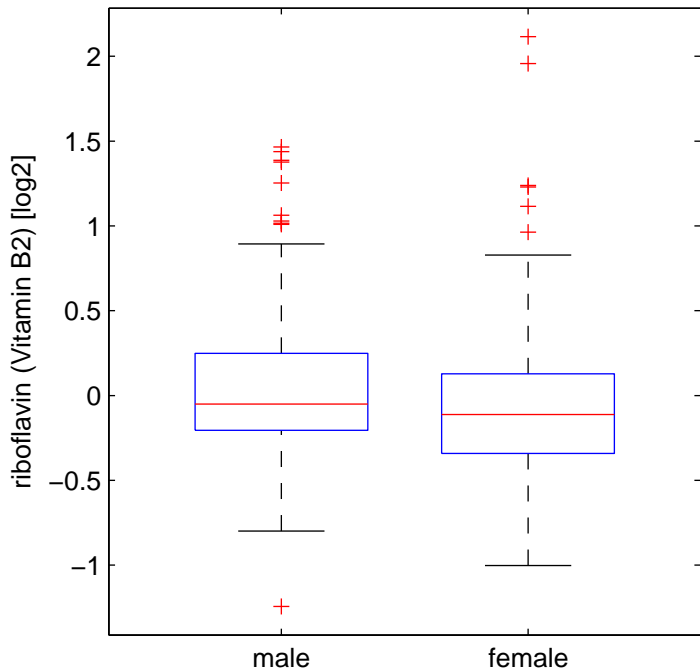

p-val: 1.03e-001

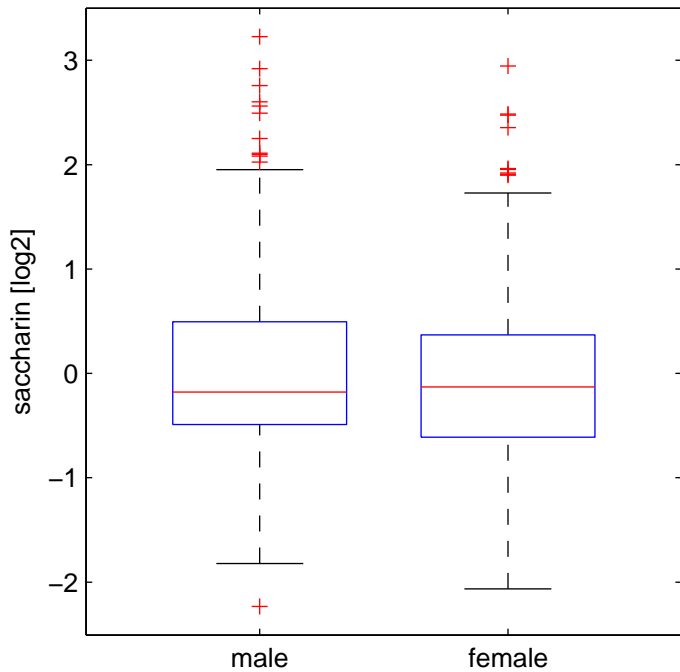

p-val: 8.39e-002

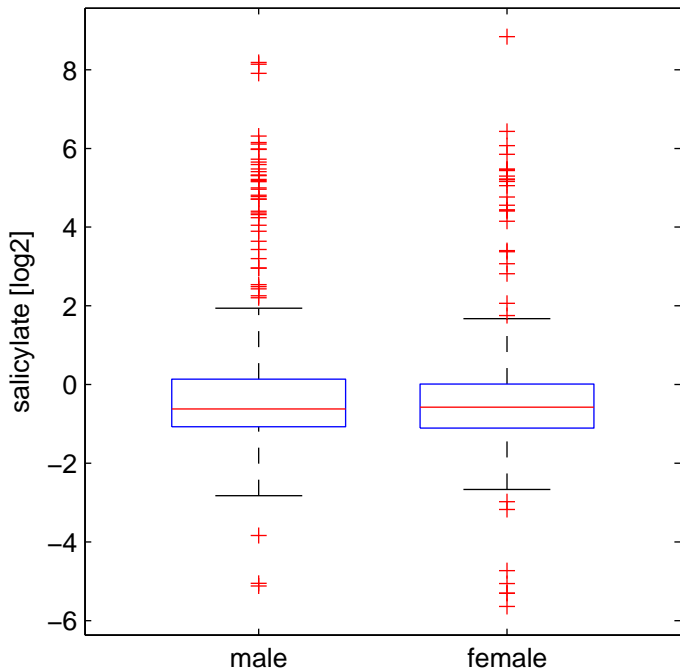



p-val: 3.37e-001

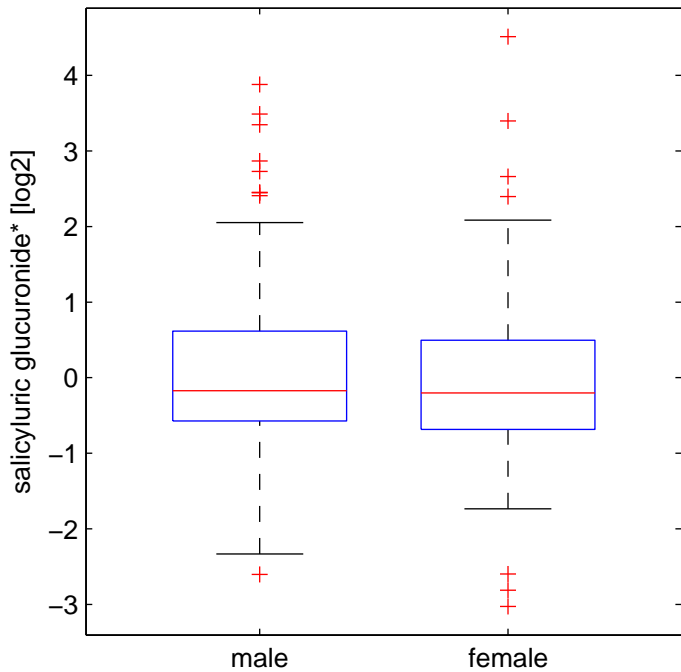

p-val: 1.32e-007

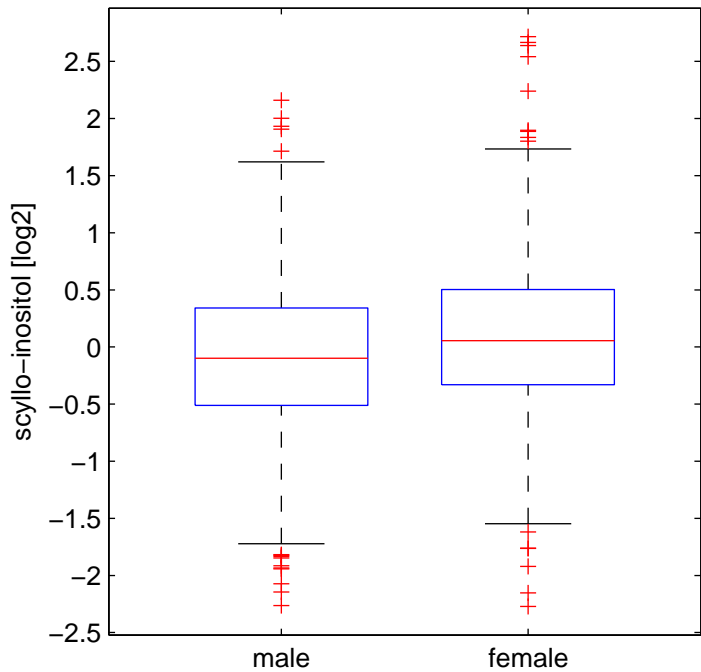

p-val: 8.41e-001

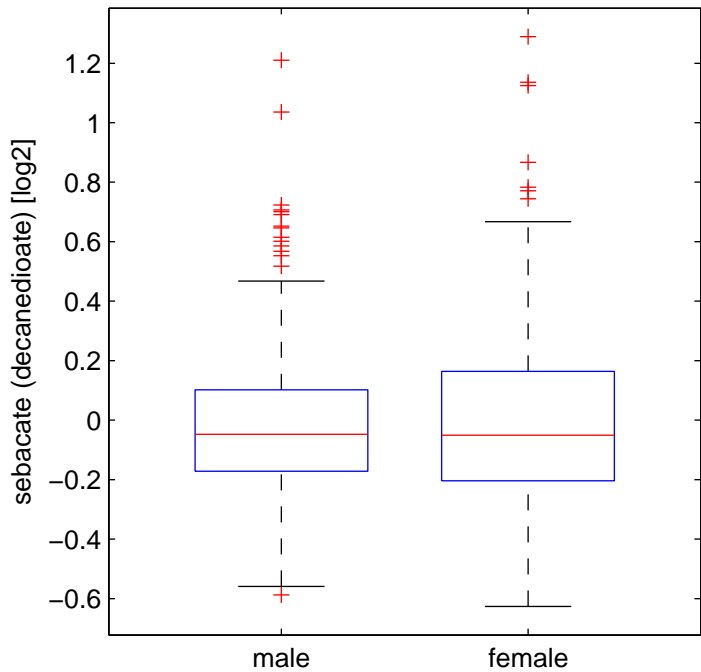

p-val: 3.38e-008

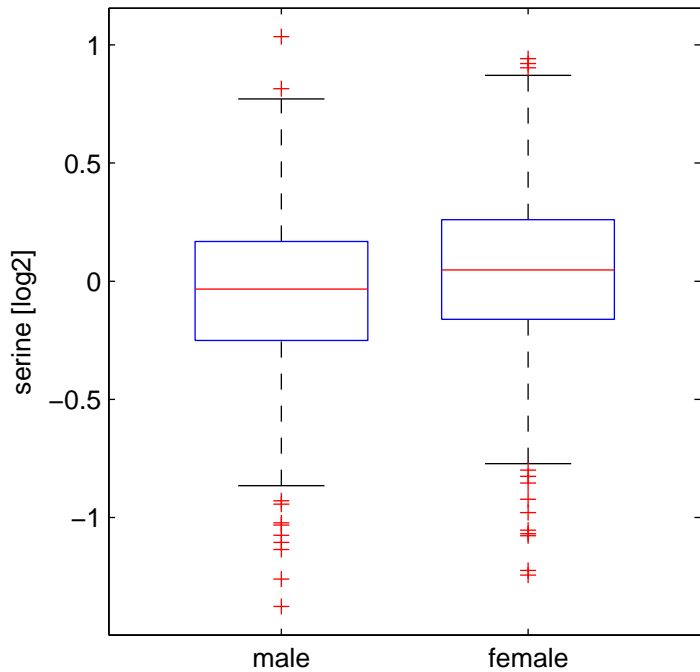

p-val: 1.12e-004

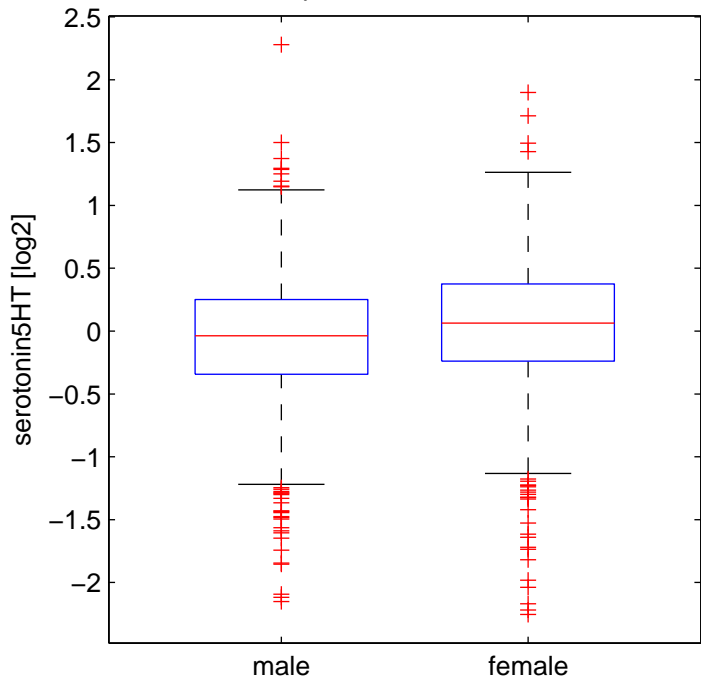

p-val: 1.02e-002

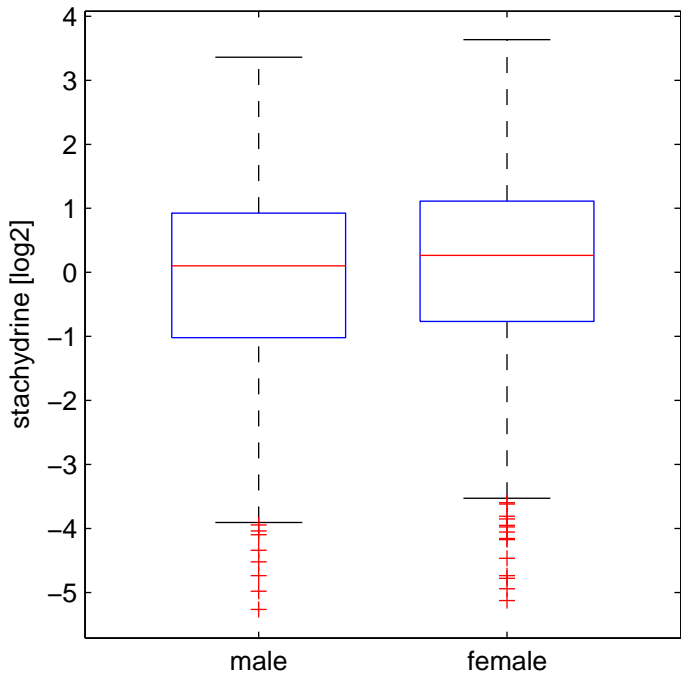

p-val: 2.93e-001

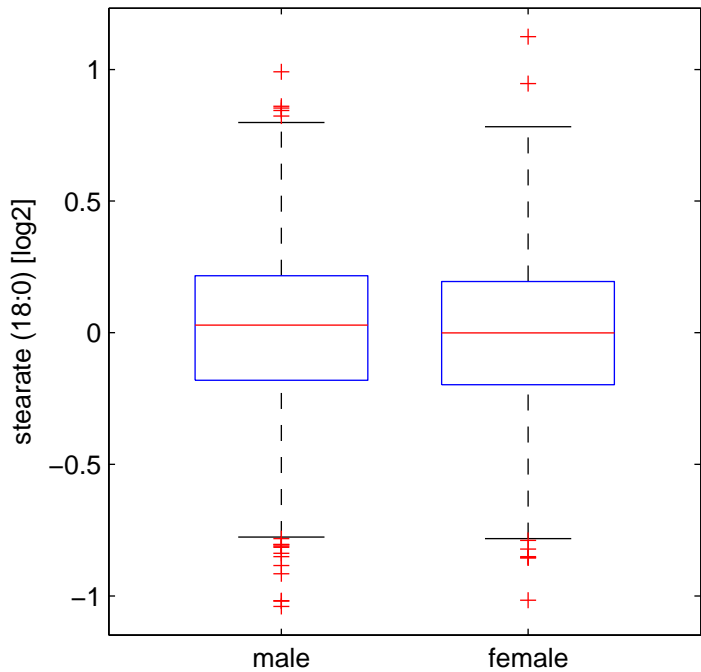

p-val: 4.16e-006

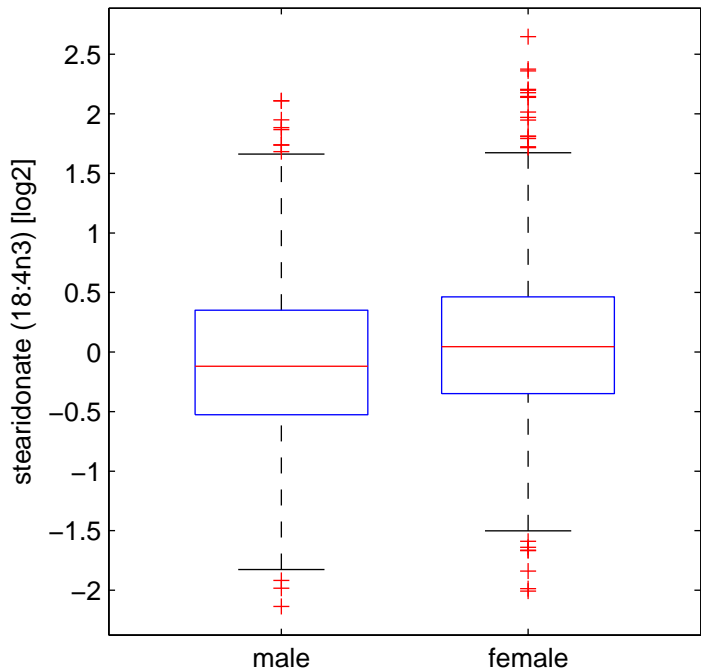



p-val: 3.00e-014

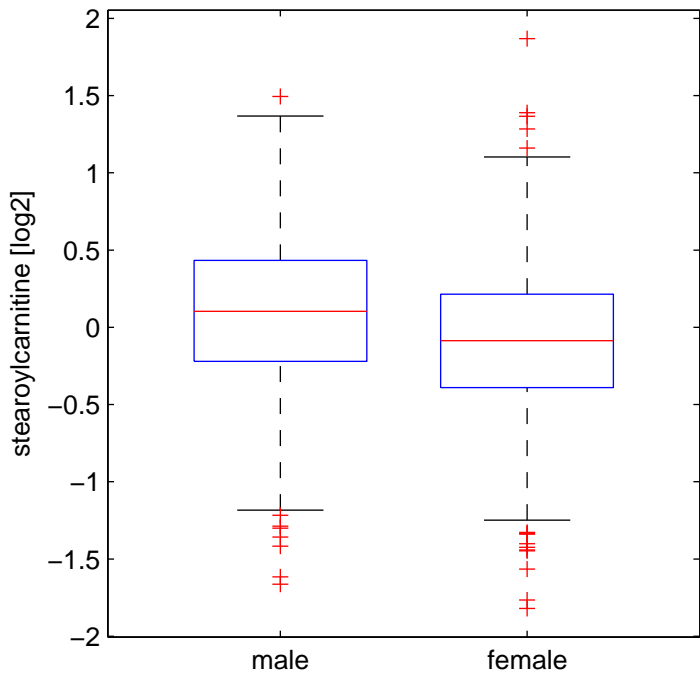

p-val: 1.92e-006

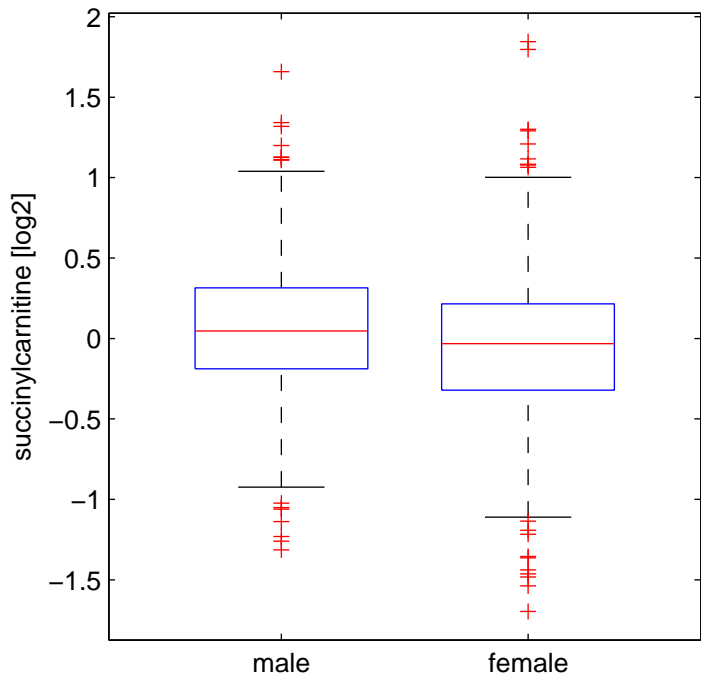

p-val: 1.72e-002

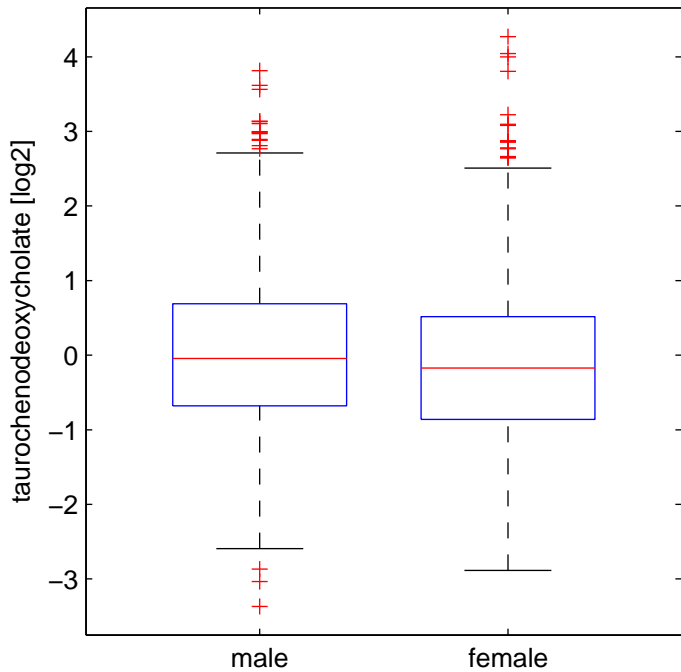

p-val: 5.00e-001

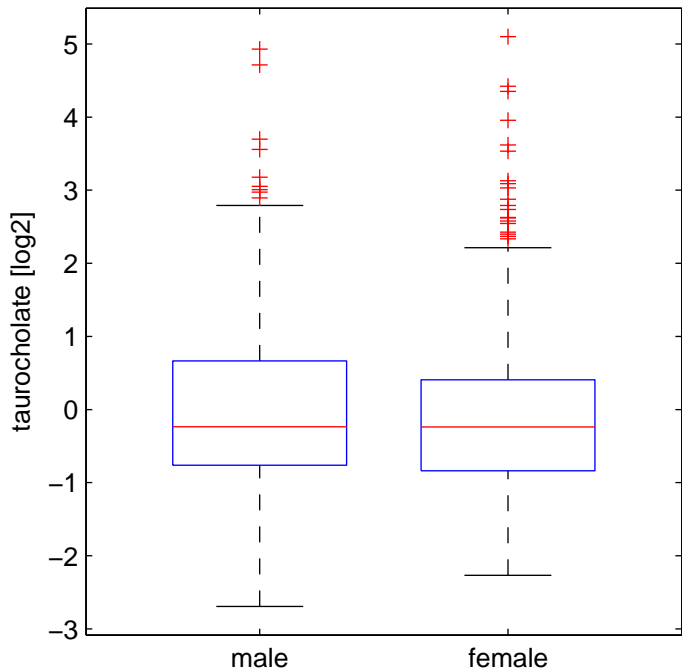

p-val: 4.15e-003

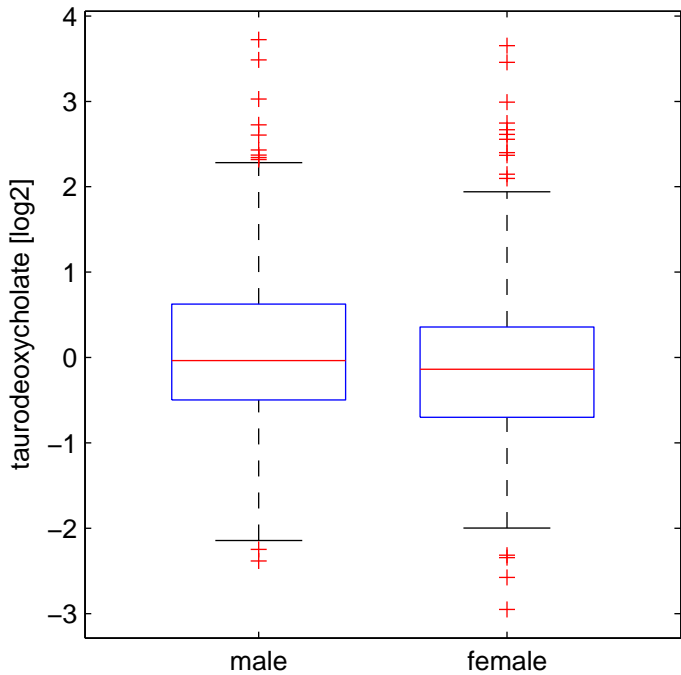

p-val: 9.27e-001

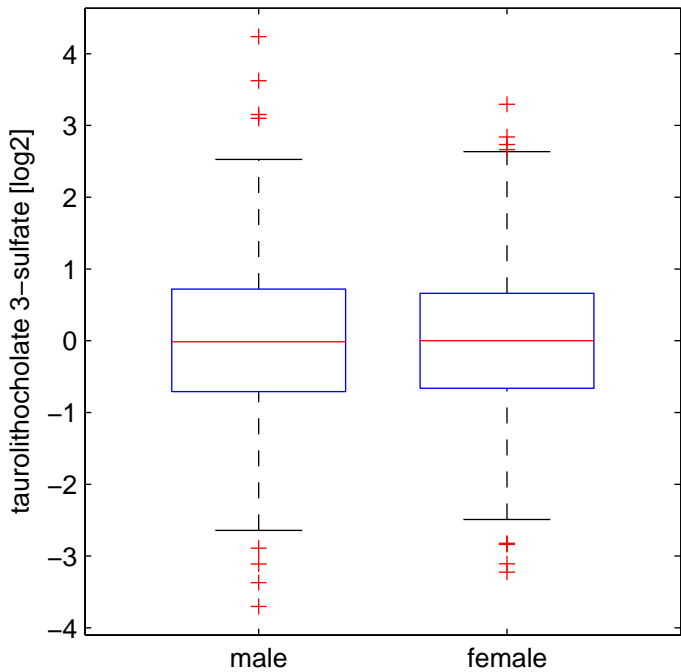

p-val: 1.07e-002

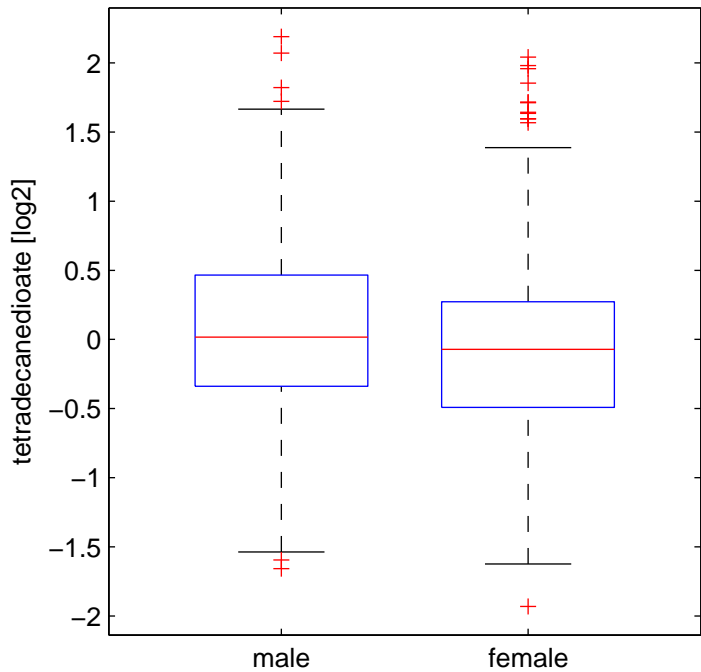

p-val: 5.83e-001

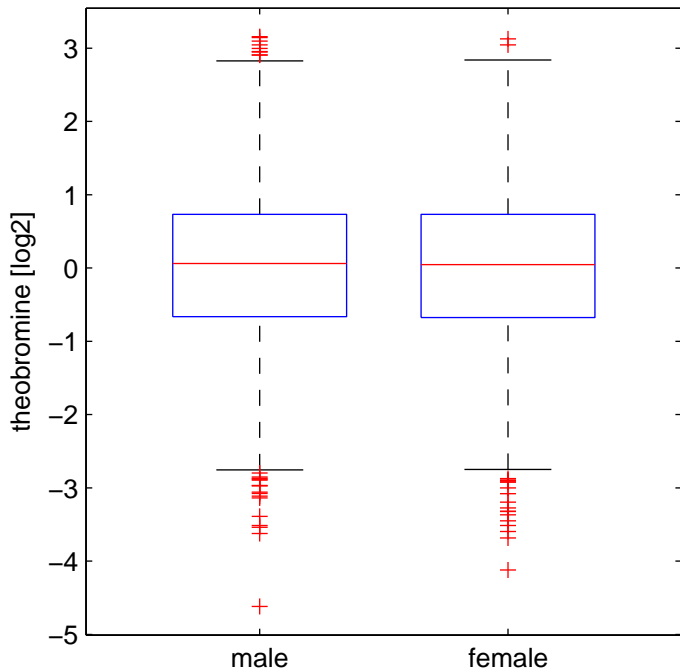



p-val: 5.91e-001

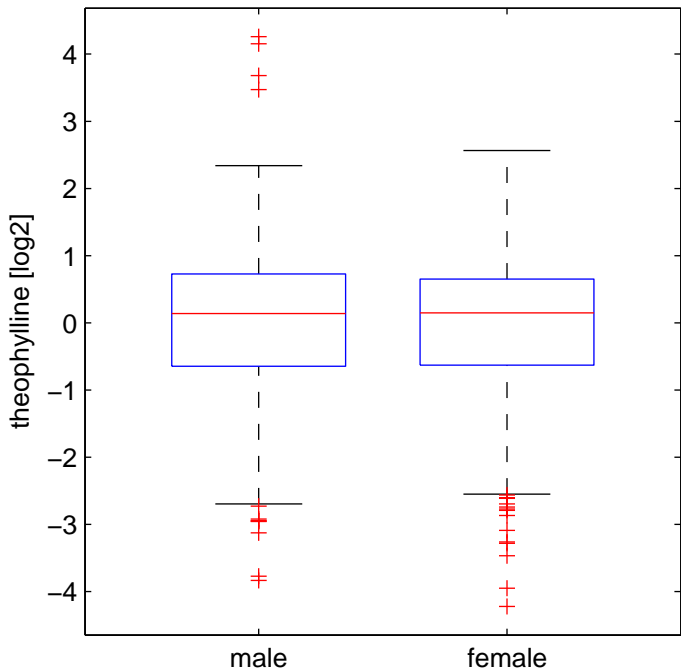

p-val: 9.83e-003

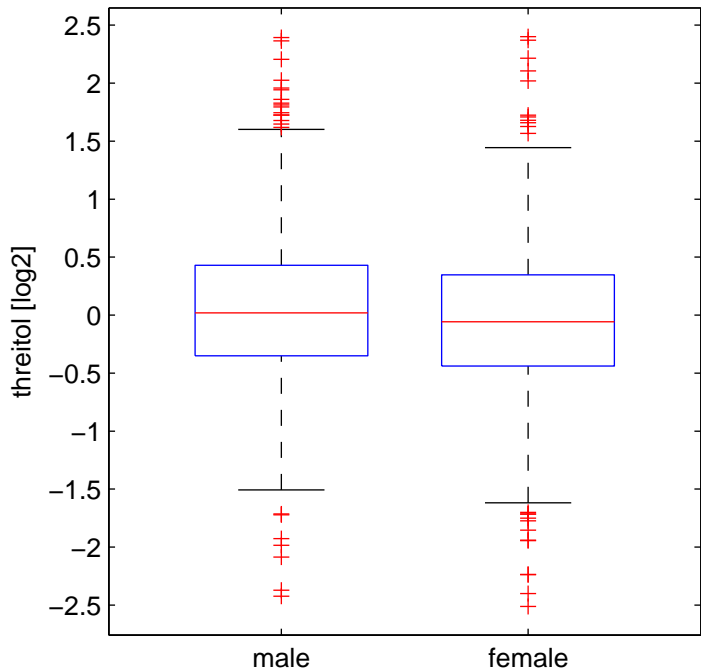

p-val: 1.52e-020

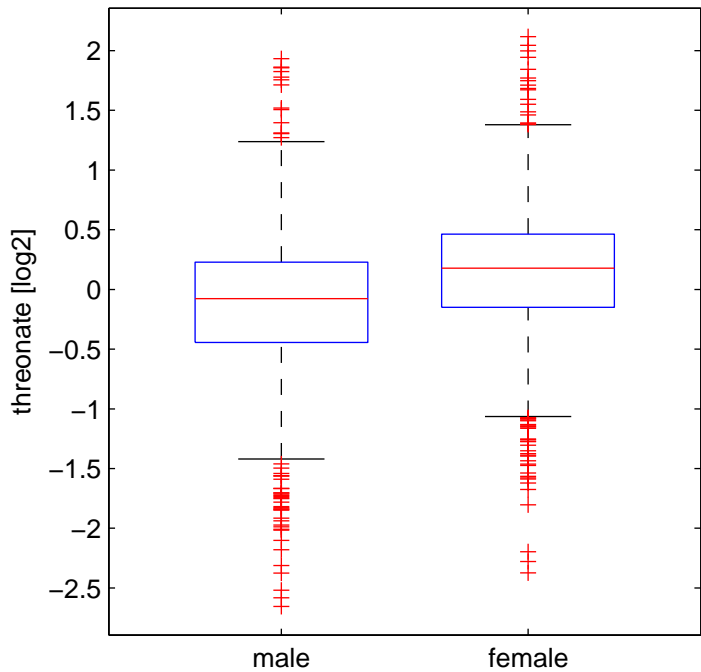

p-val: 5.87e-001

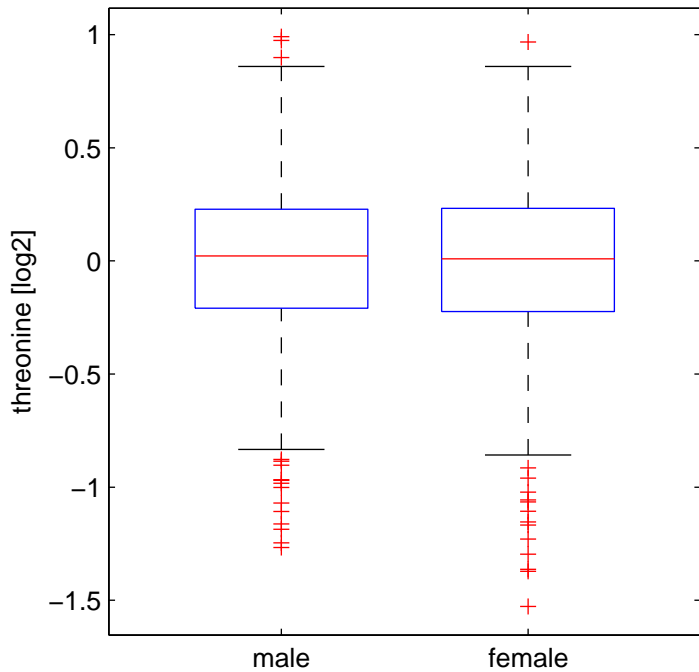

p-val: 7.28e-065

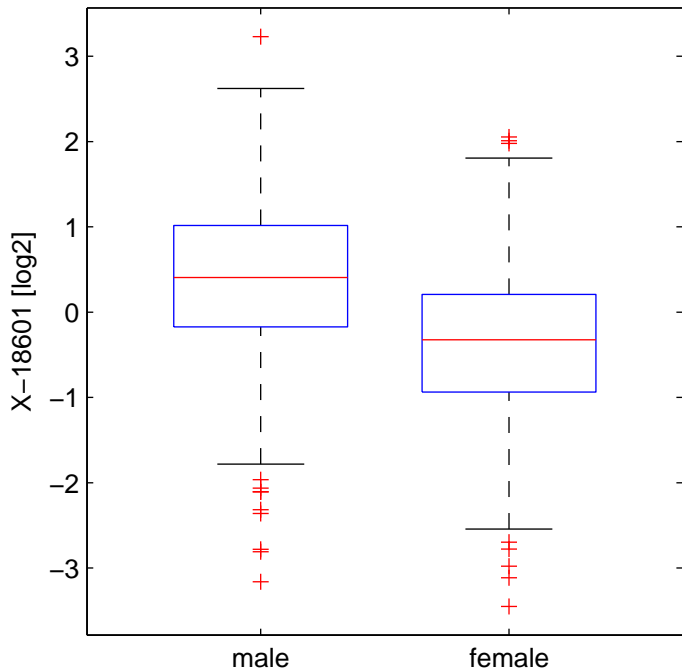

p-val: 3.14e-001

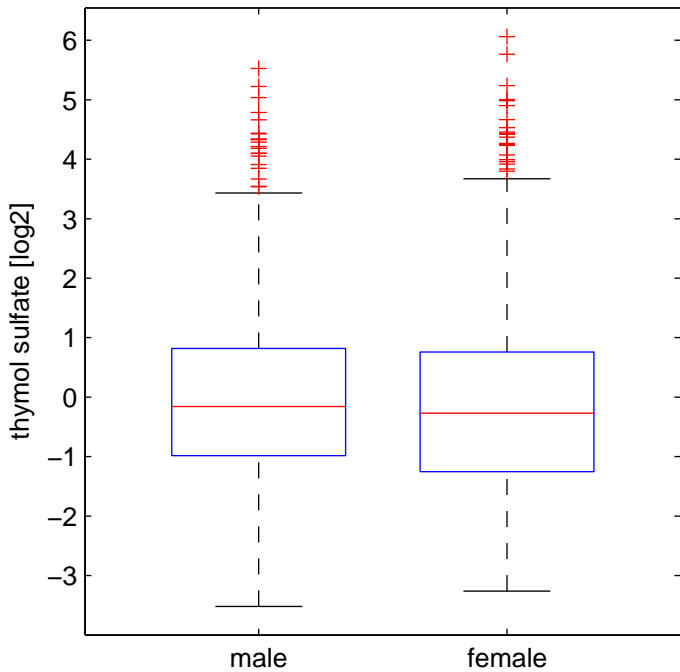

p-val: 5.63e-008

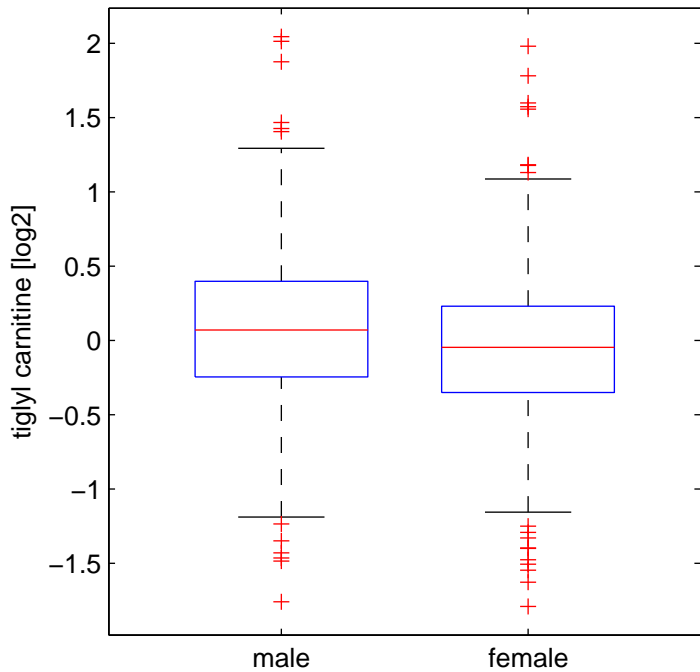

p-val: 8.79e-011

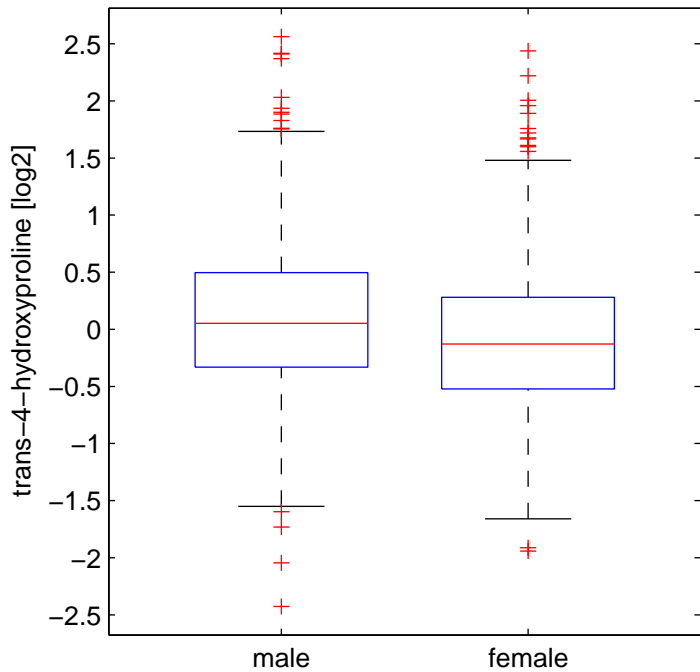



p-val: 8.88e-002

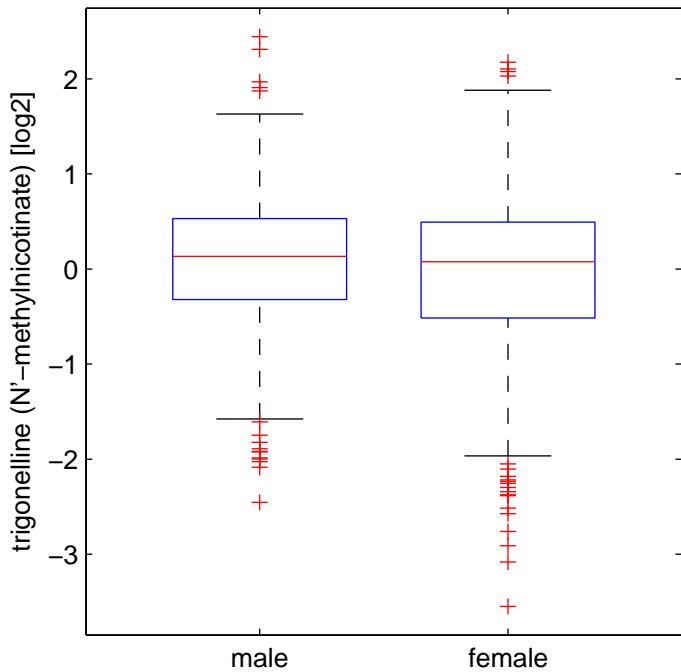

p-val:  $6.96e-033$

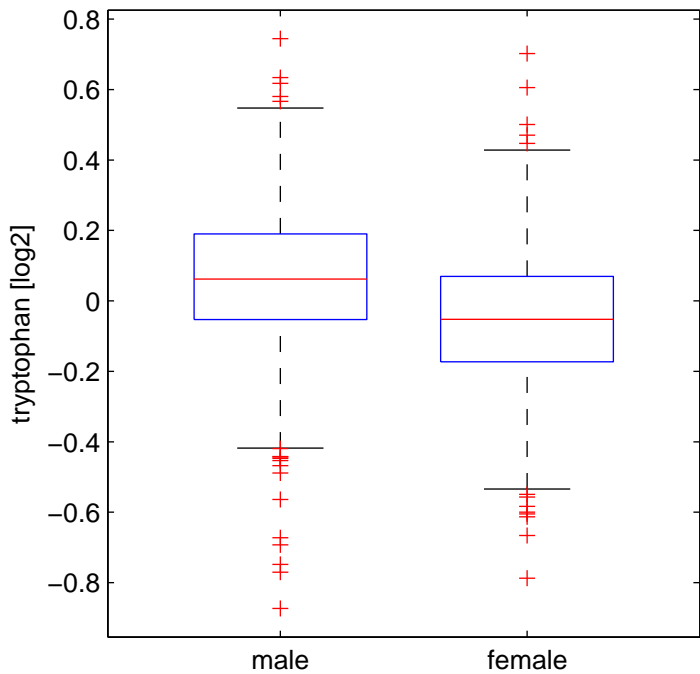

p-val: 6.98e-013

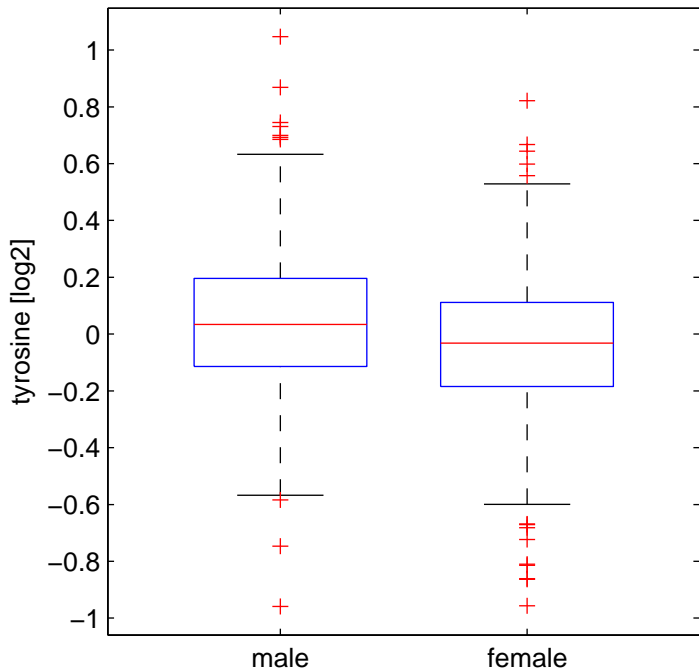

p-val: 3.24e-006

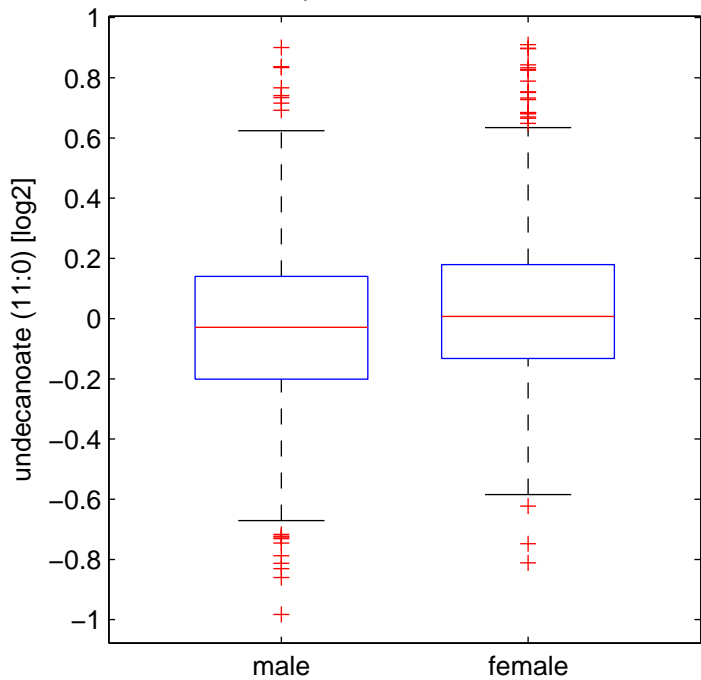

p-val:  $7.04e-114$

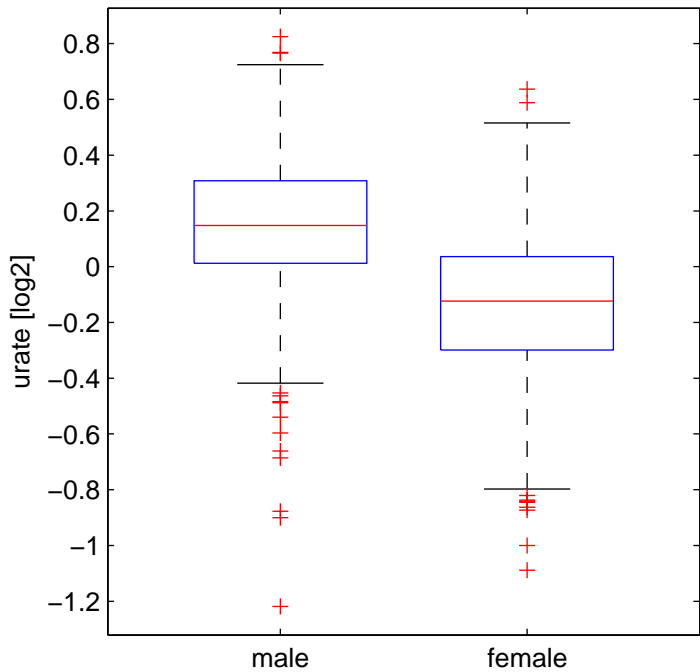

p-val: 9.17e-009

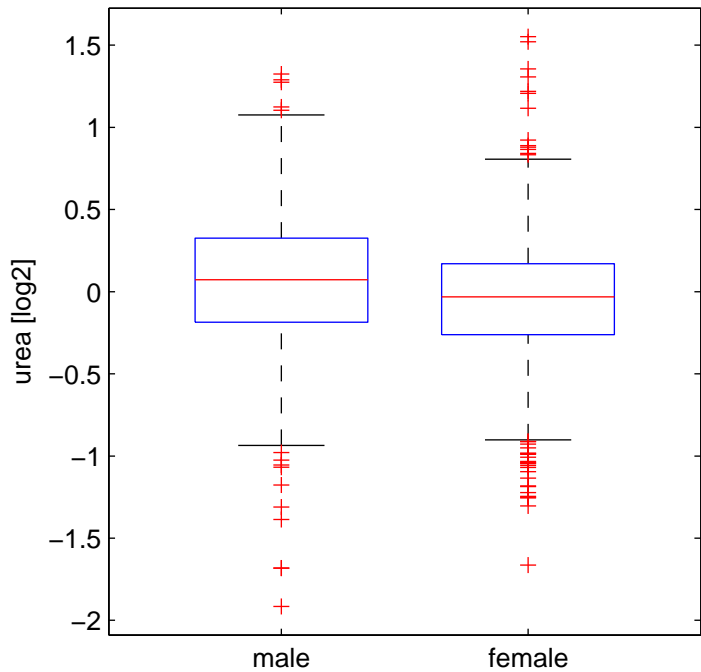

p-val: 2.12e-001

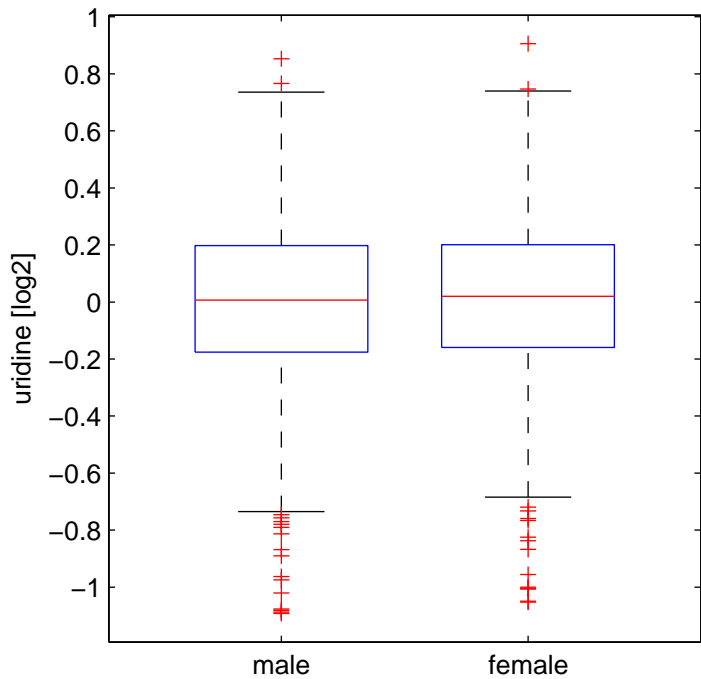

p-val: 7.57e-004

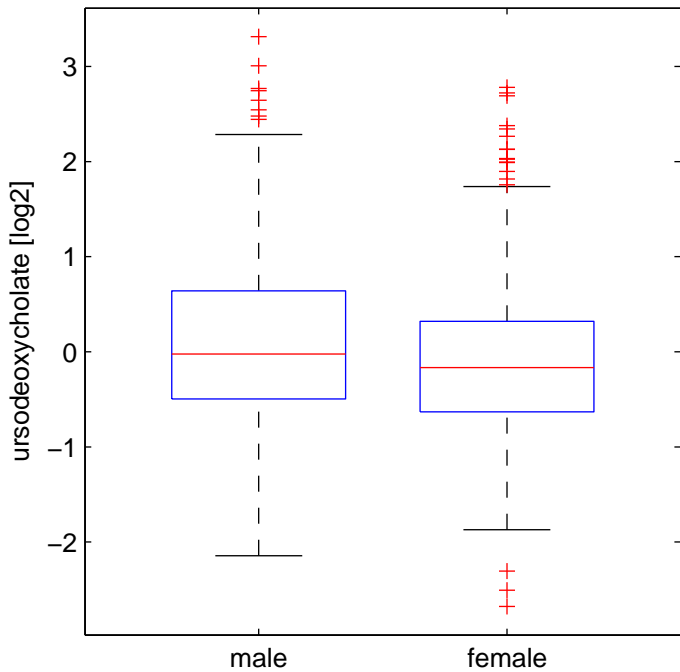



p-val: 3.81e-005

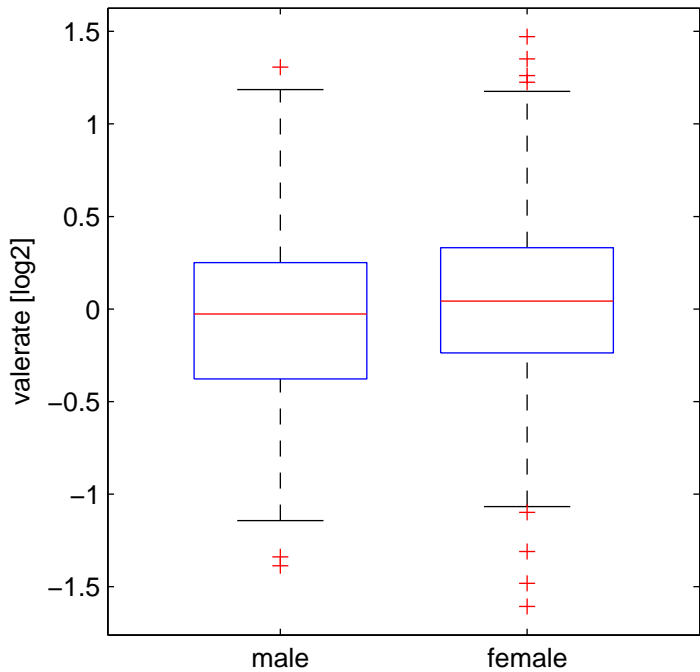

p-val: 1.41e-067

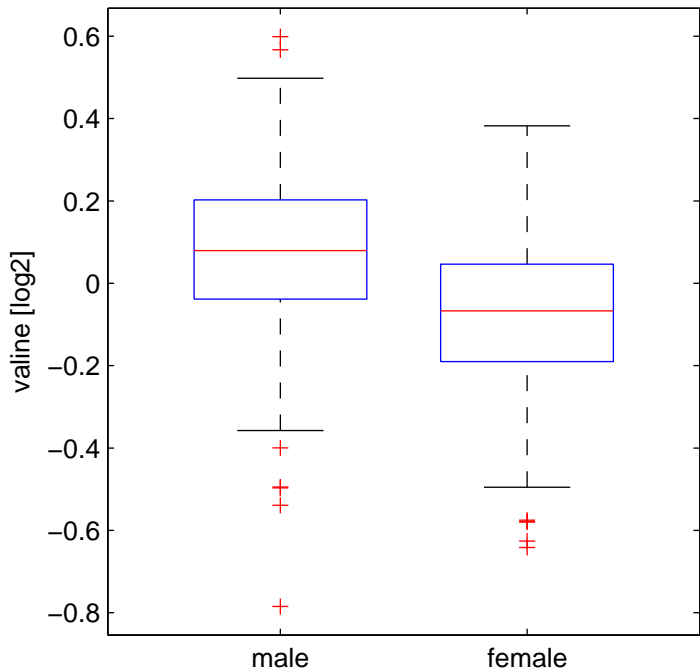

p-val: 3.57e-026

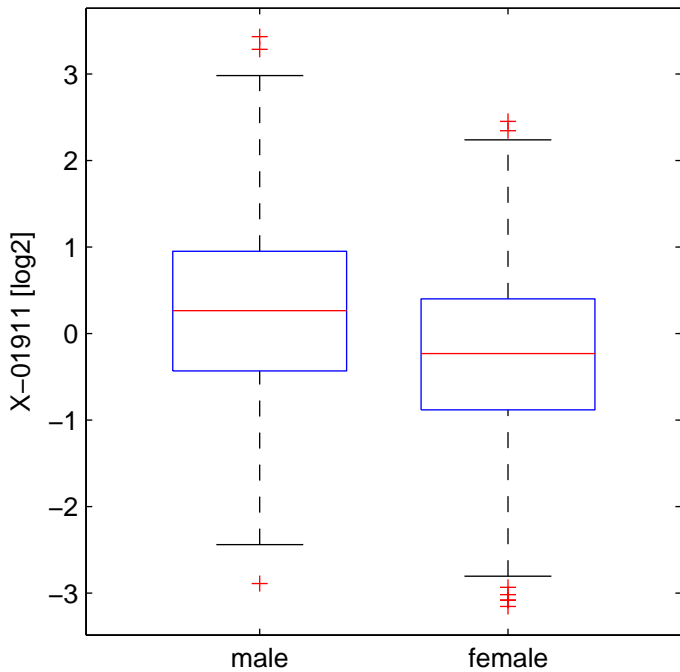

p-val: 1.16e-003

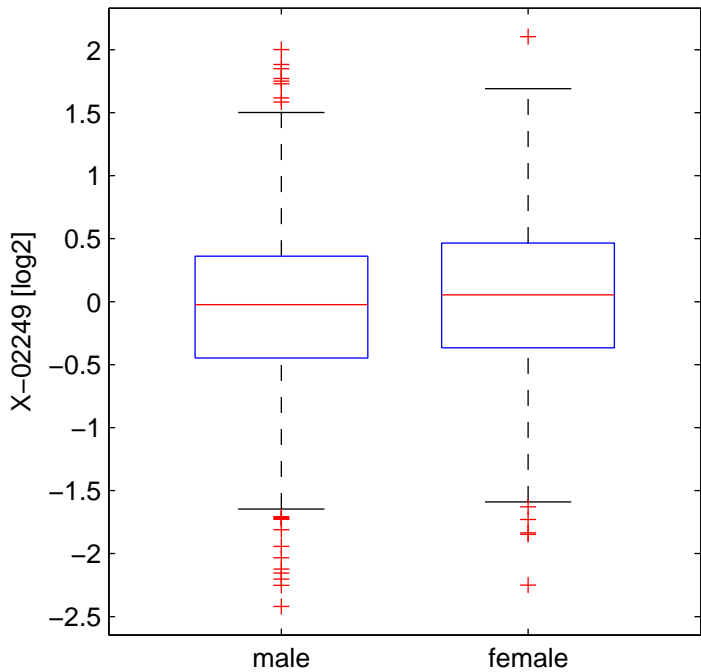

p-val: 1.18e-001

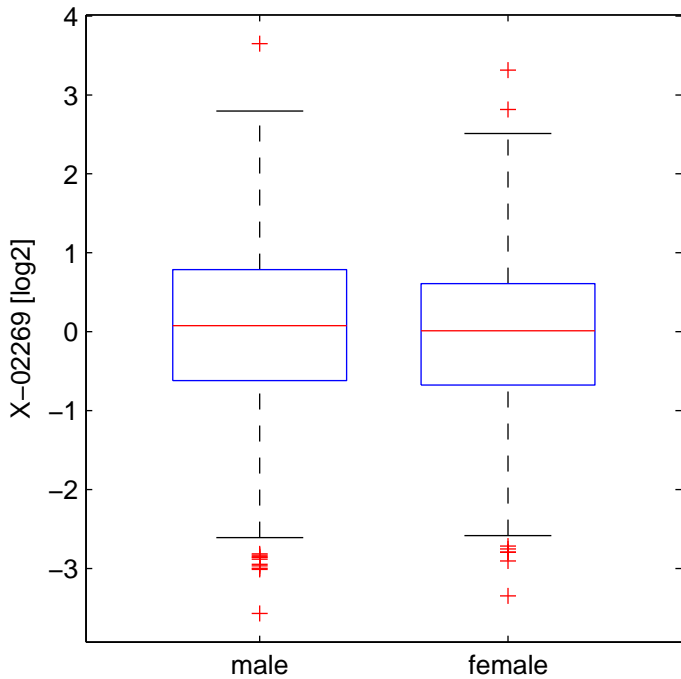

p-val: 1.40e-001

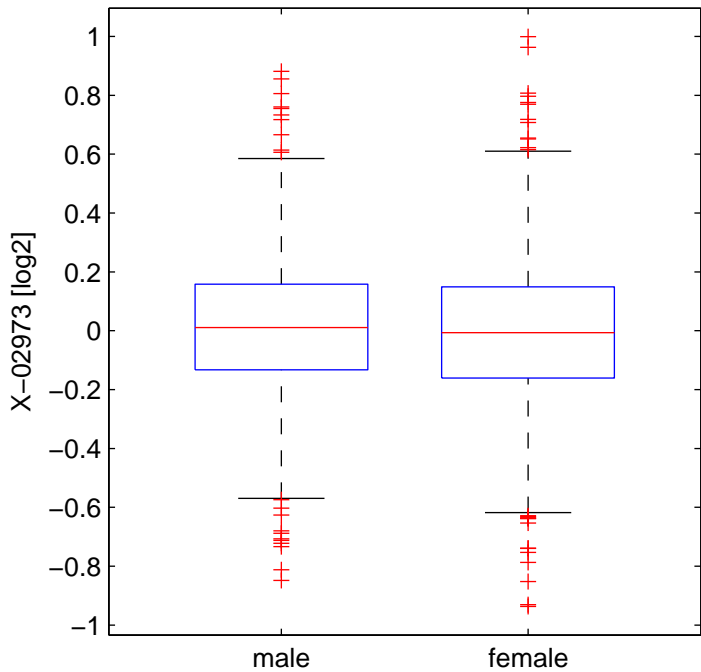

p-val: 3.03e-002

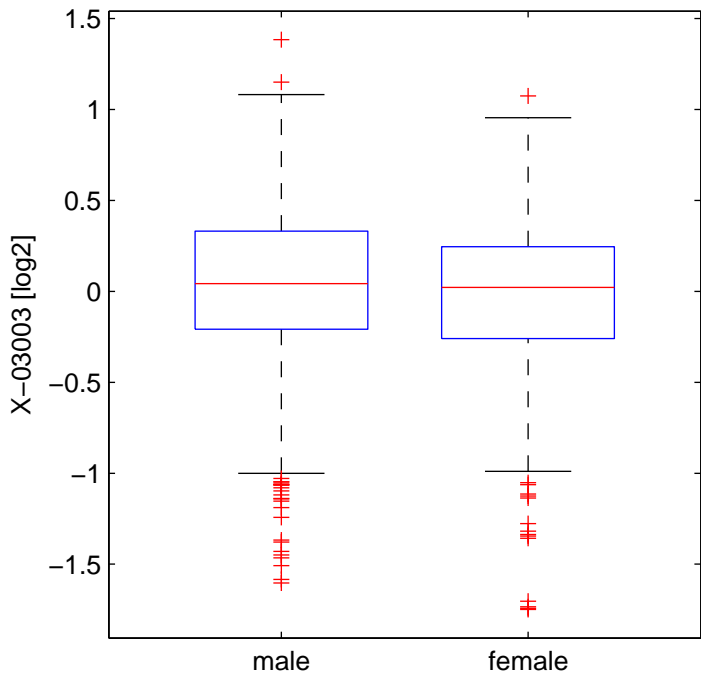

p-val: 3.18e-002

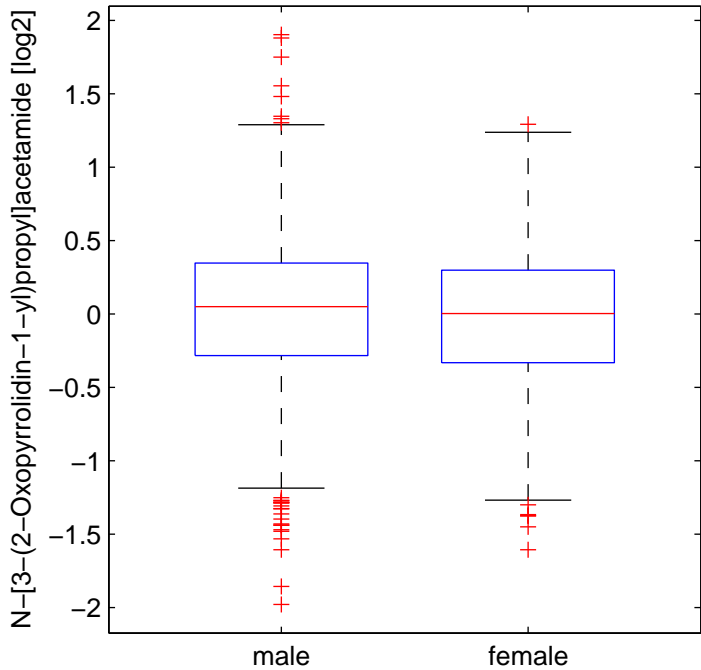



p-val: 2.26e-001

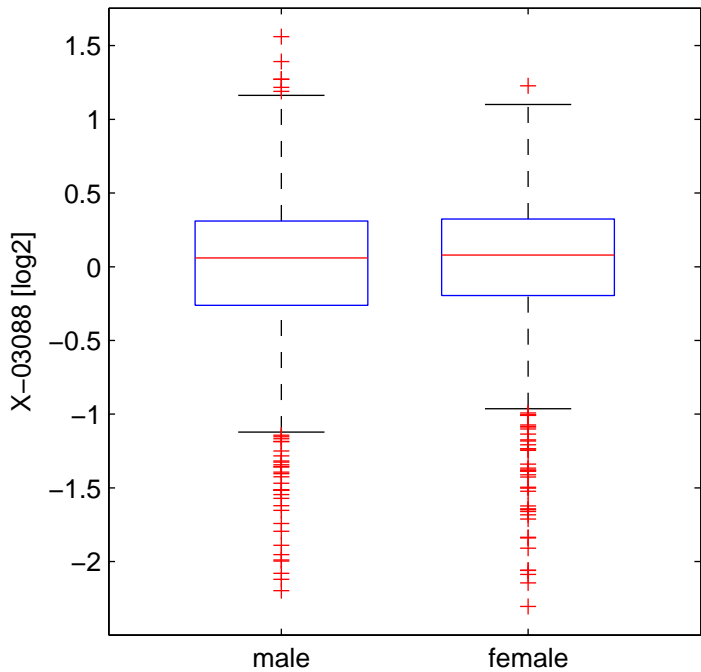

p-val: 3.23e-001

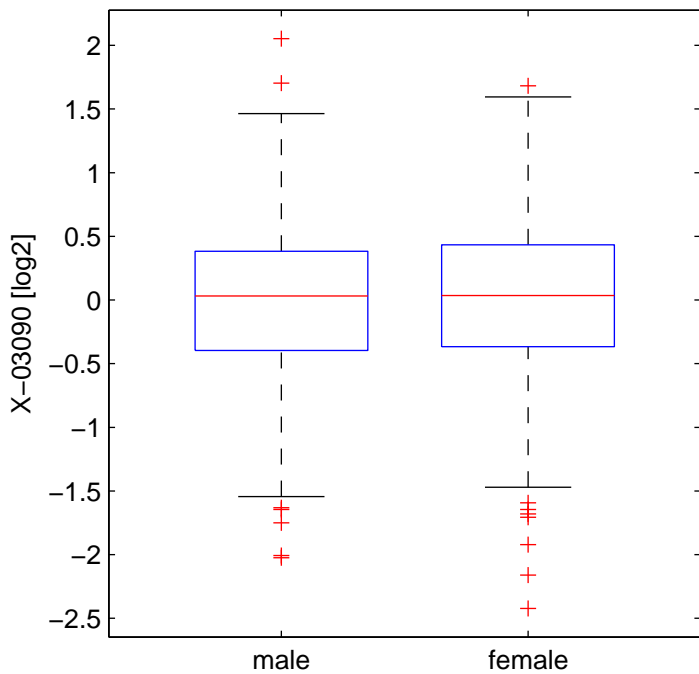

p-val: 4.05e-004

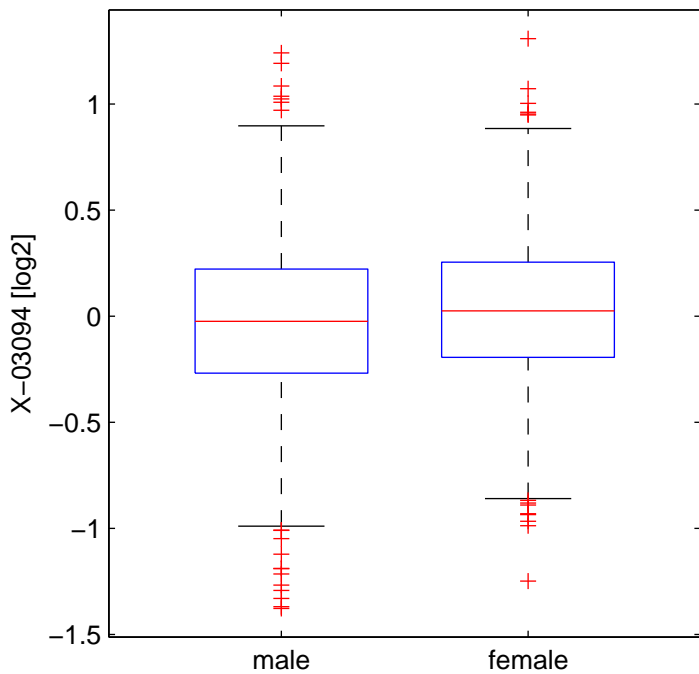

p-val: 2.54e-004

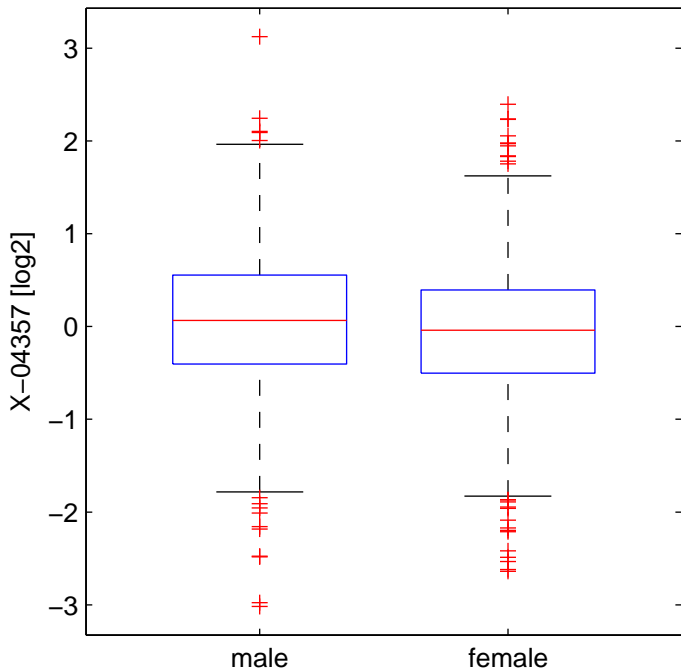

p-val: 3.21e-003

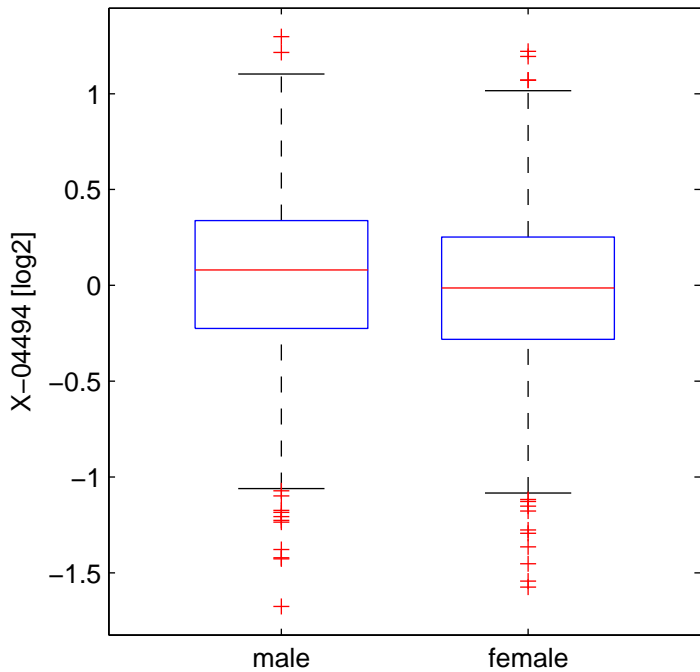

p-val: 1.15e-094

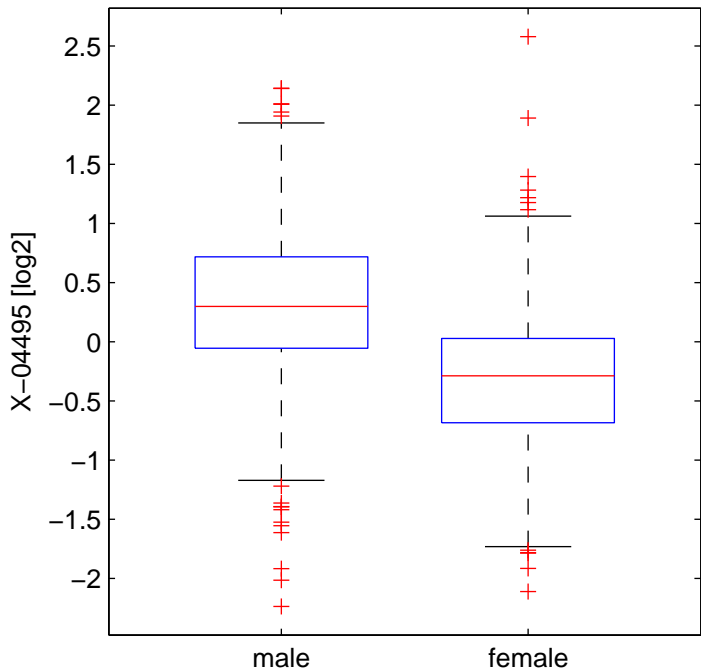

p-val:  $8.49e-011$

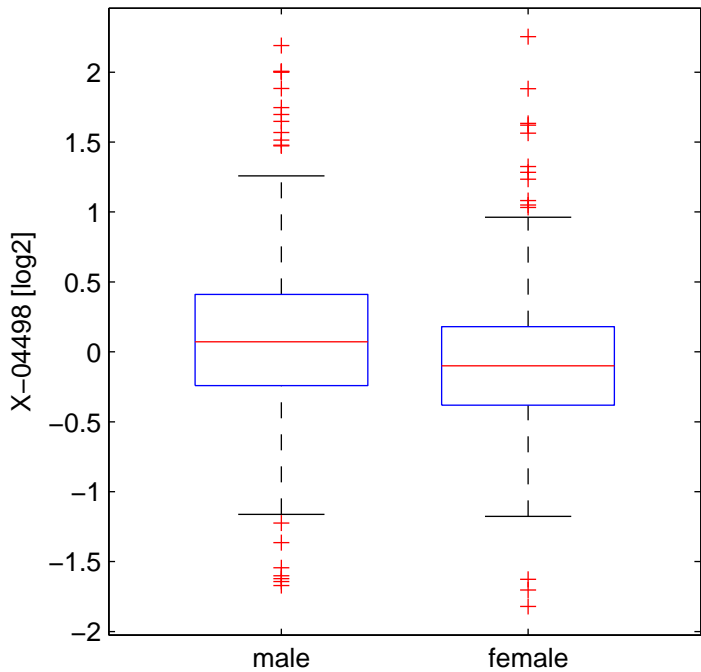

p-val: 2.23e-004

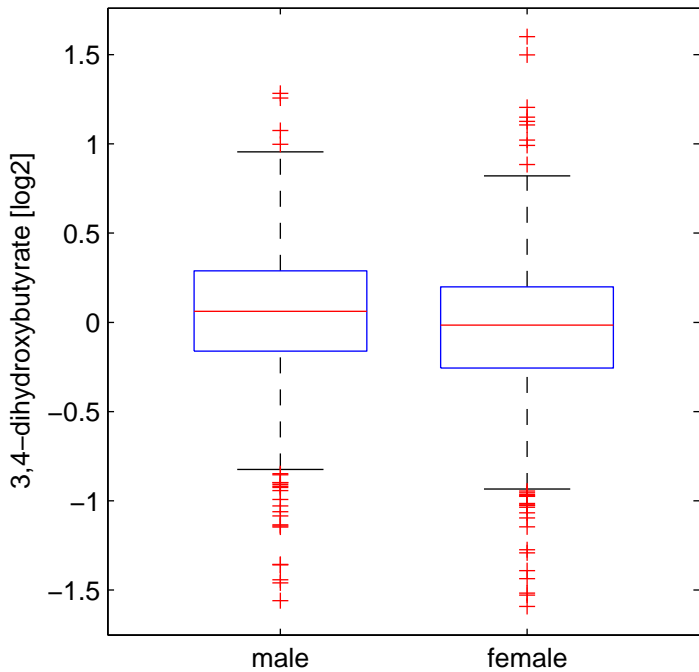



p-val: 1.86e-001

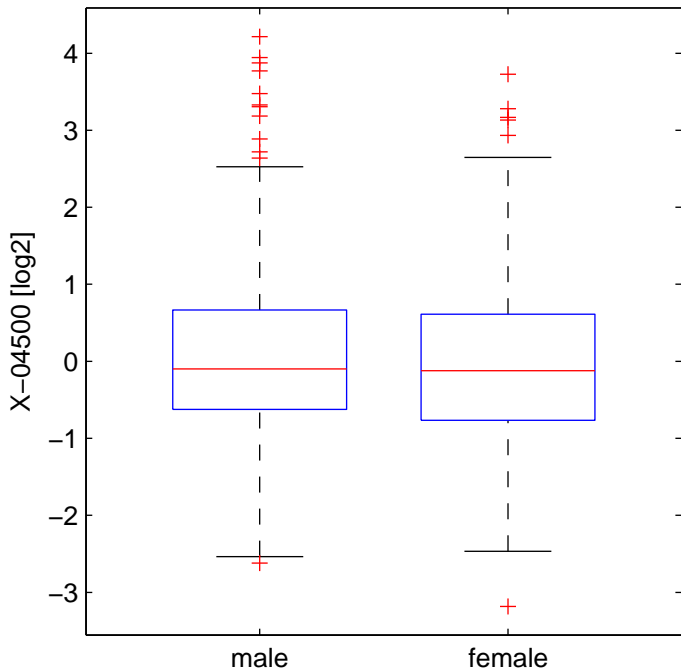

p-val: 5.57e-001

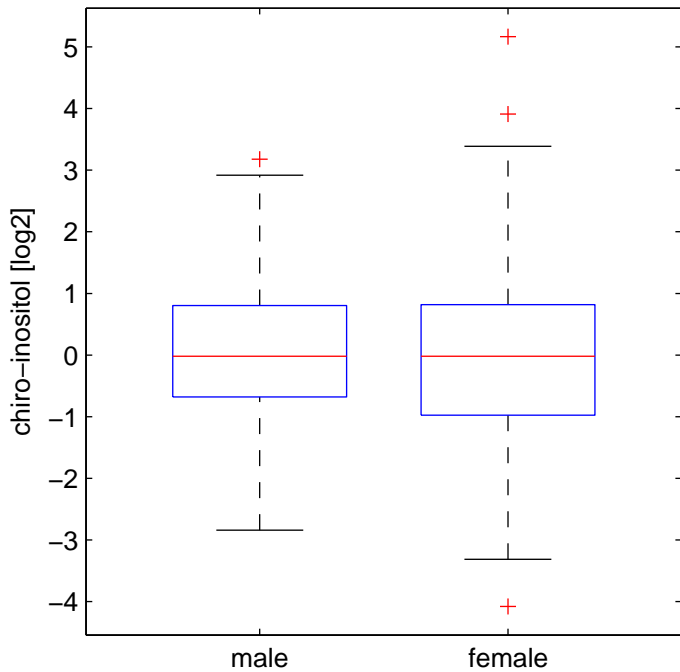

p-val: 7.45e-001

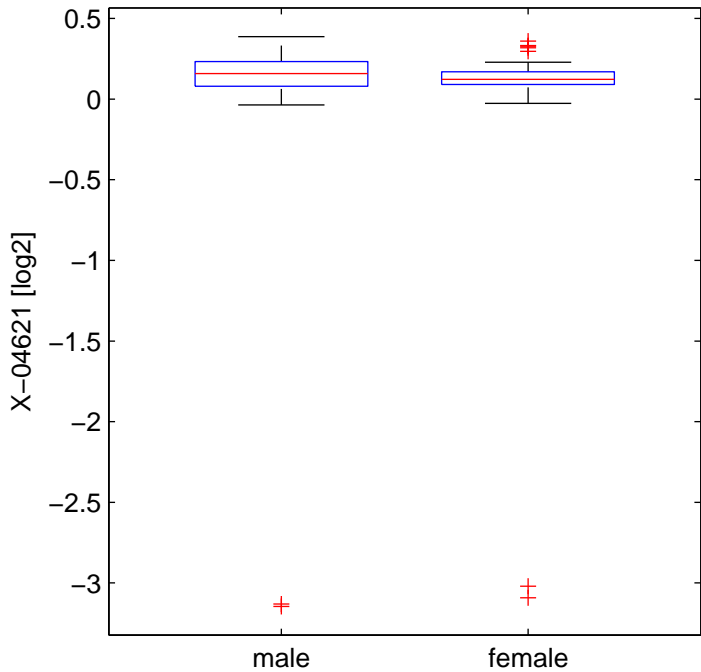

p-val: 3.98e-004

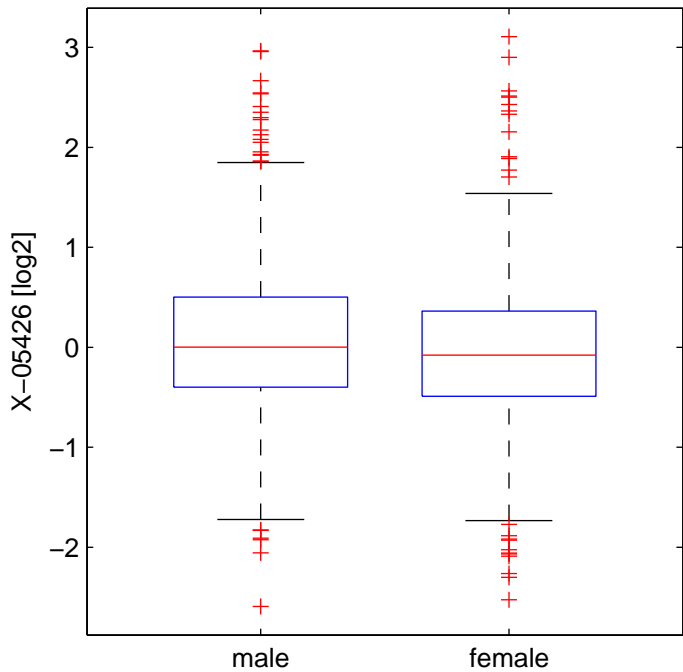

p-val: 1.23e-003

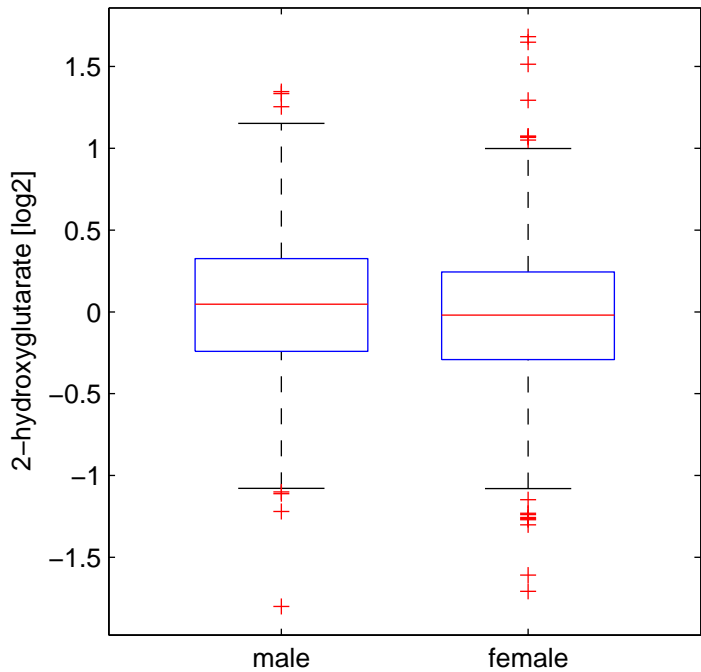

p-val: 2.76e-003

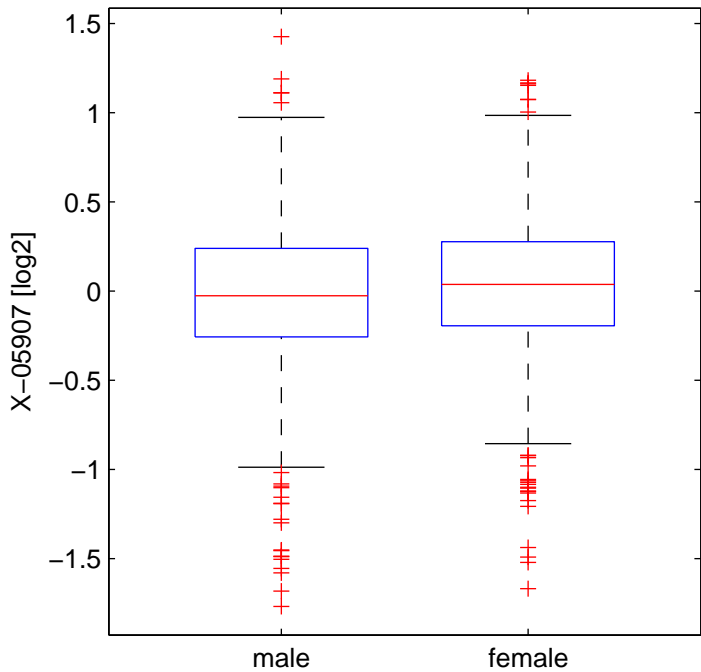

p-val: 6.42e-001

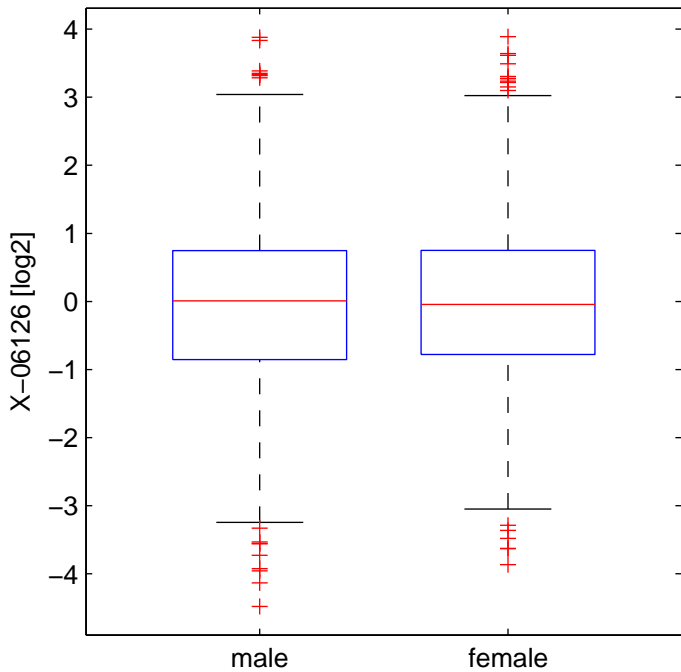

p-val: 5.04e-001

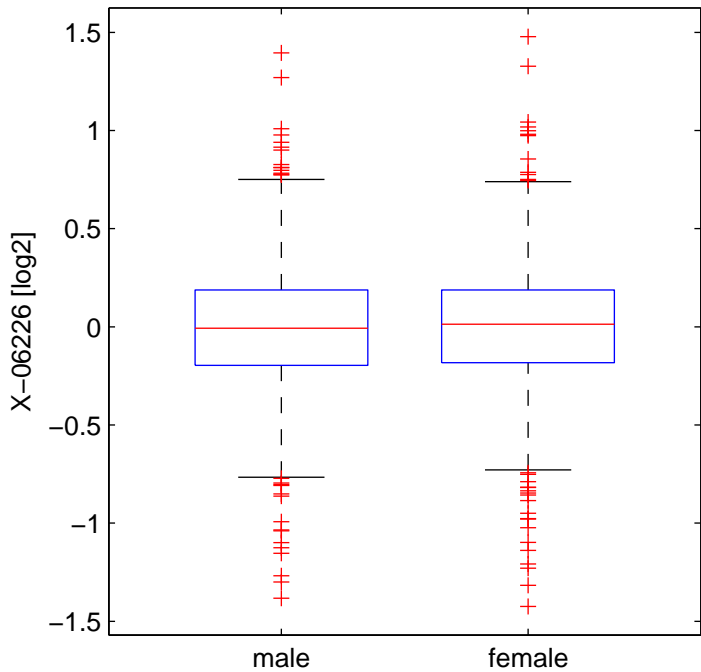



p-val: 1.40e-002

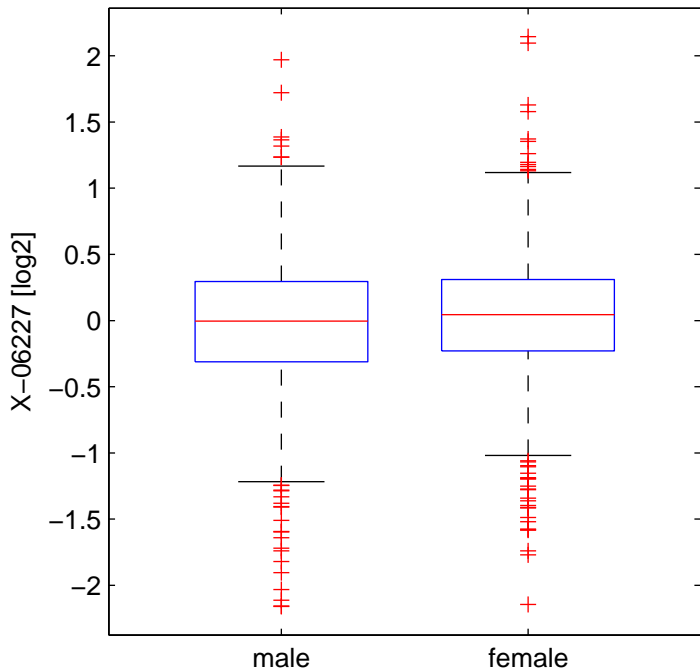

p-val: 4.29e-001

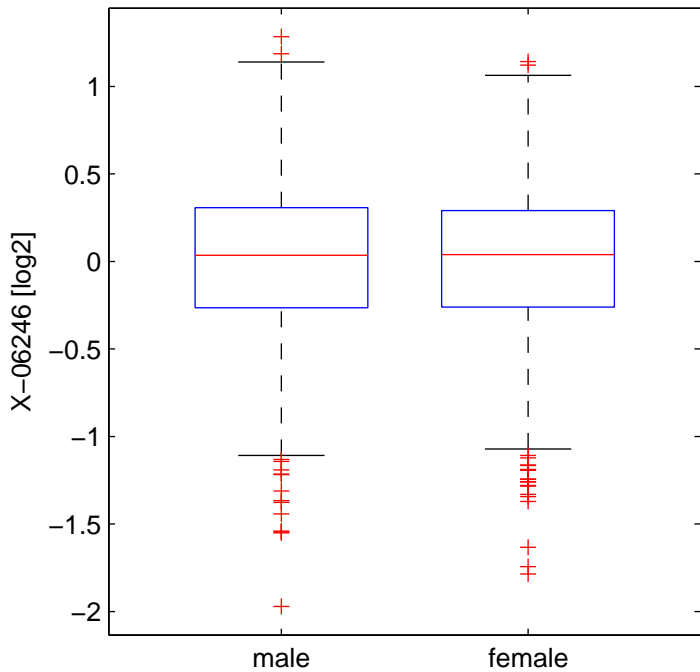

p-val: 7.02e-001

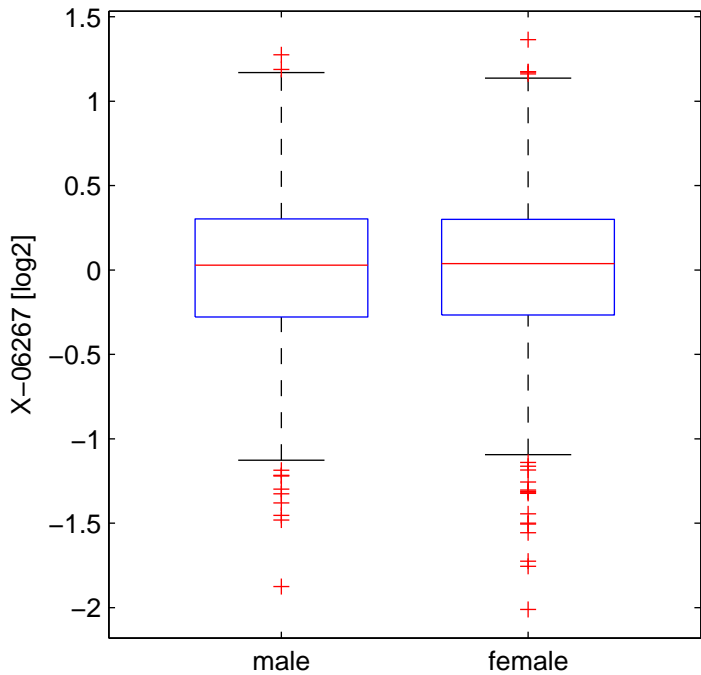

p-val: 8.84e-001

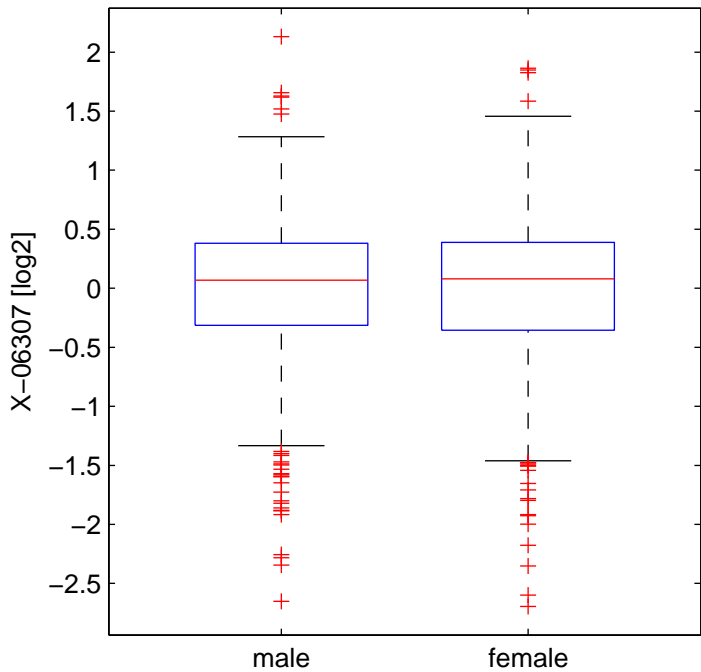

p-val: 2.04e-001

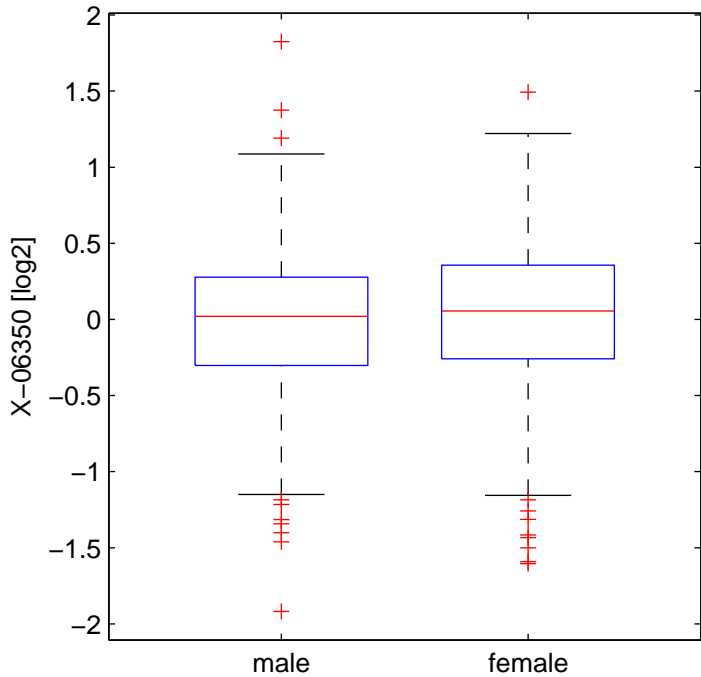

p-val: 8.67e-004

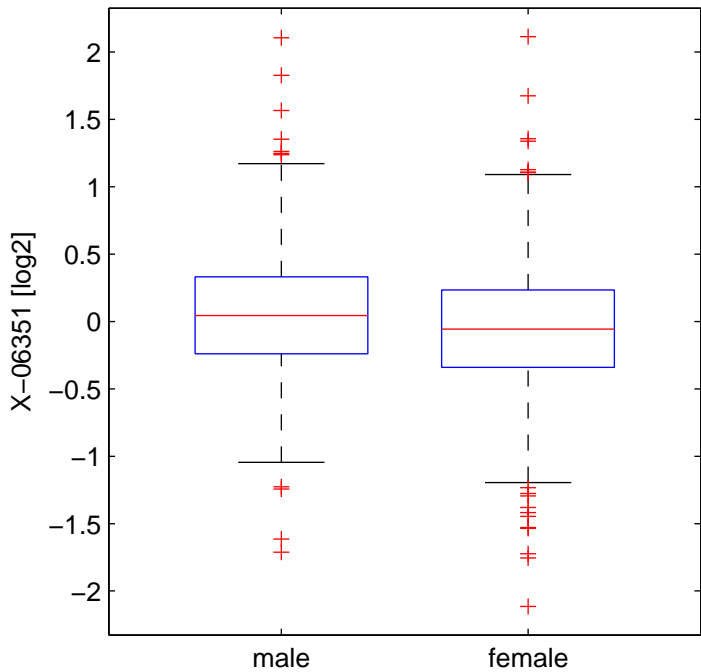

p-val: 1.92e-001

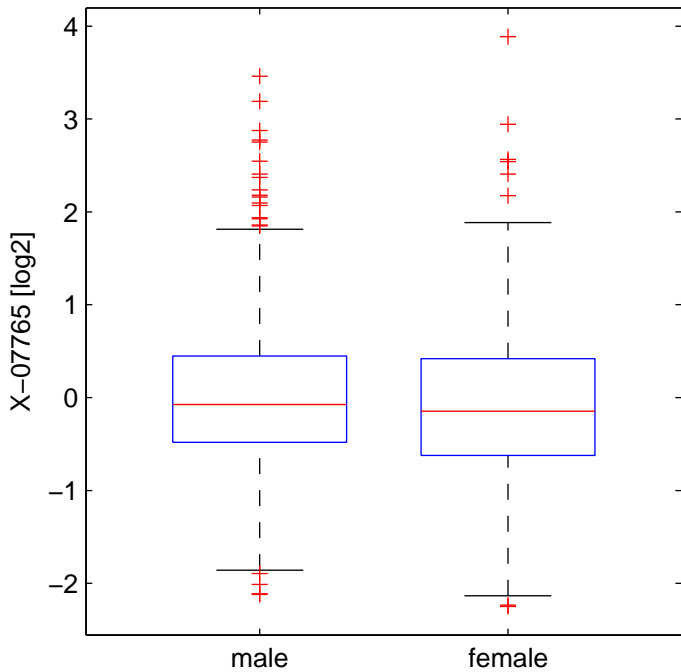

p-val: 2.28e-026

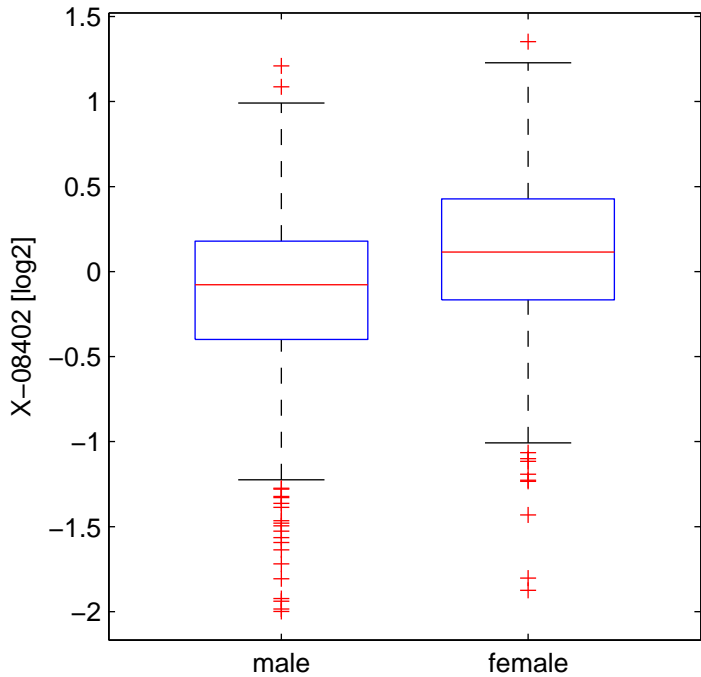



p-val: 1.00e-001

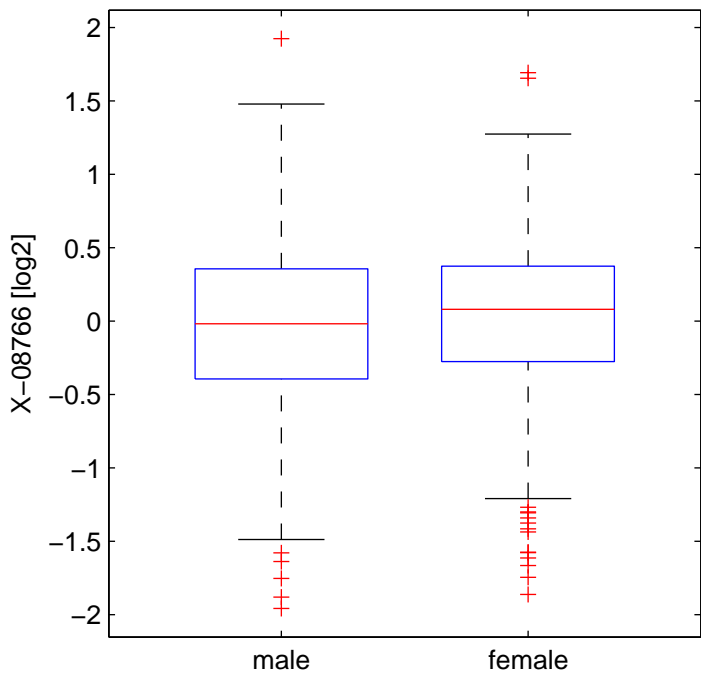

p-val: 2.54e-006

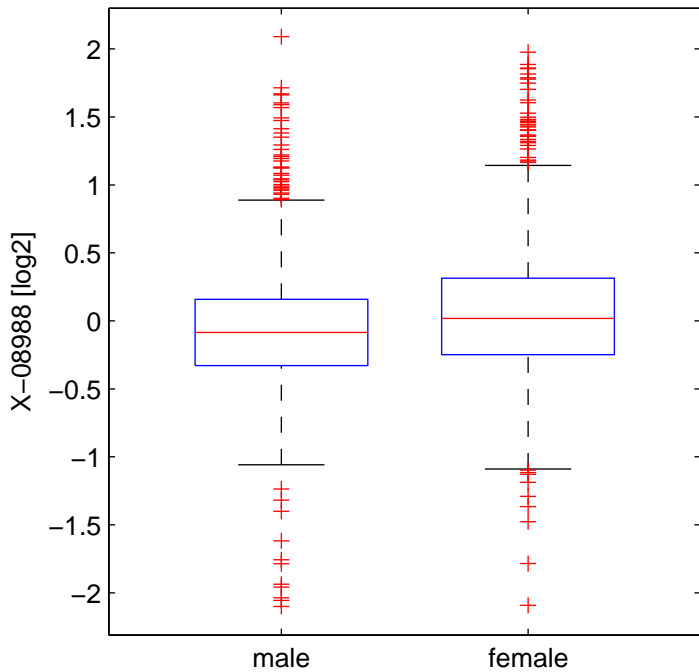

p-val: 9.91e-010

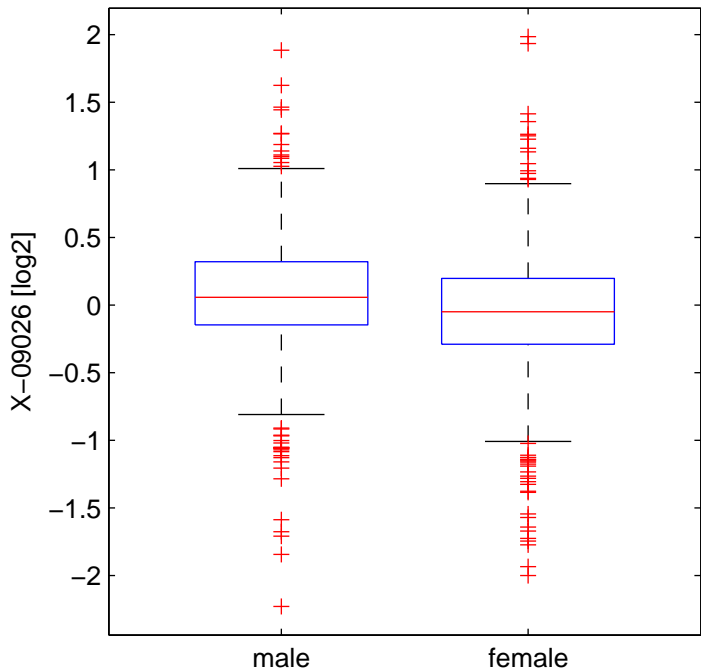

p-val: 4.11e-001

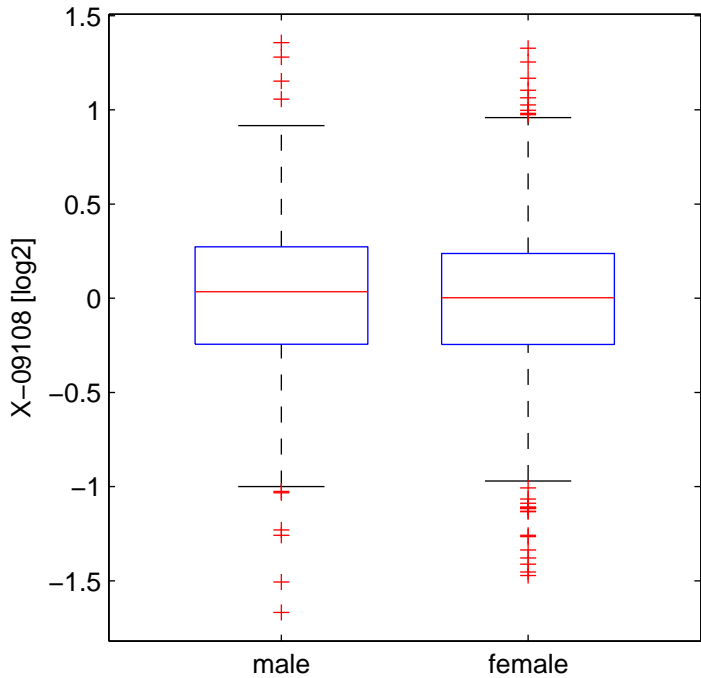

p-val: 2.49e-005

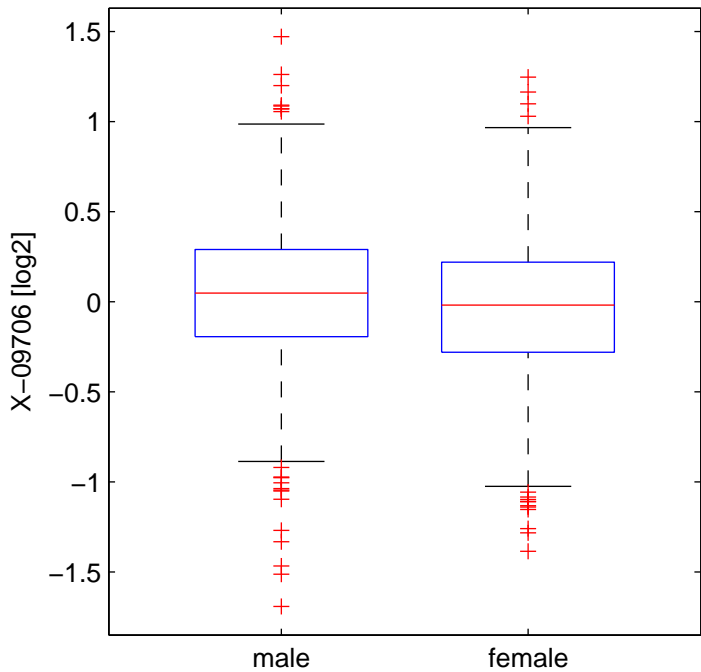

p-val: 4.37e-004

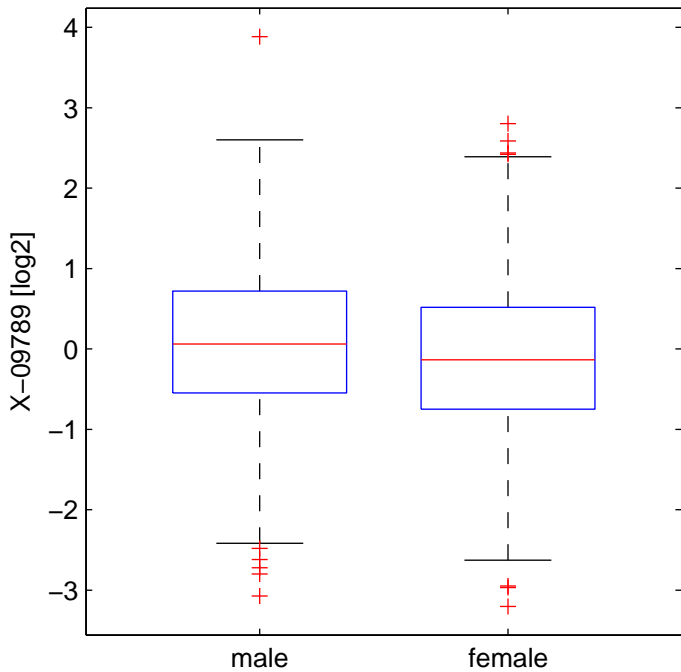

p-val: 2.22e-001

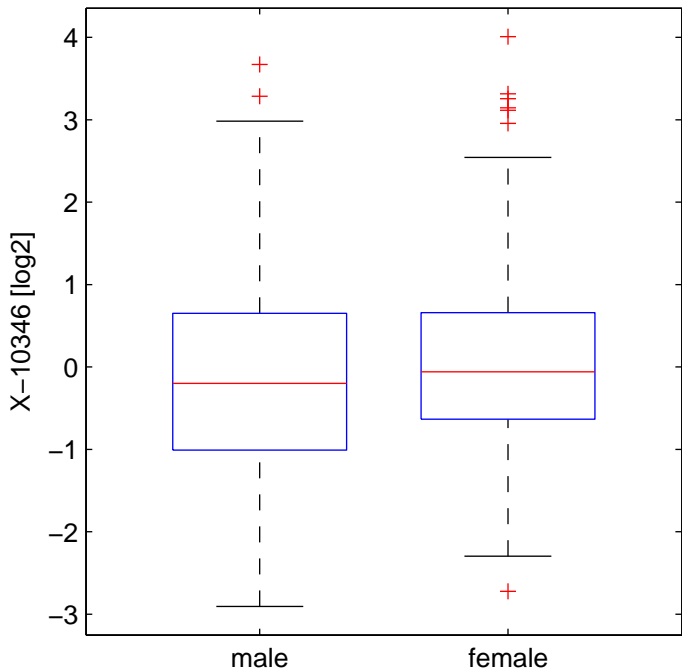

p-val: 6.64e-001

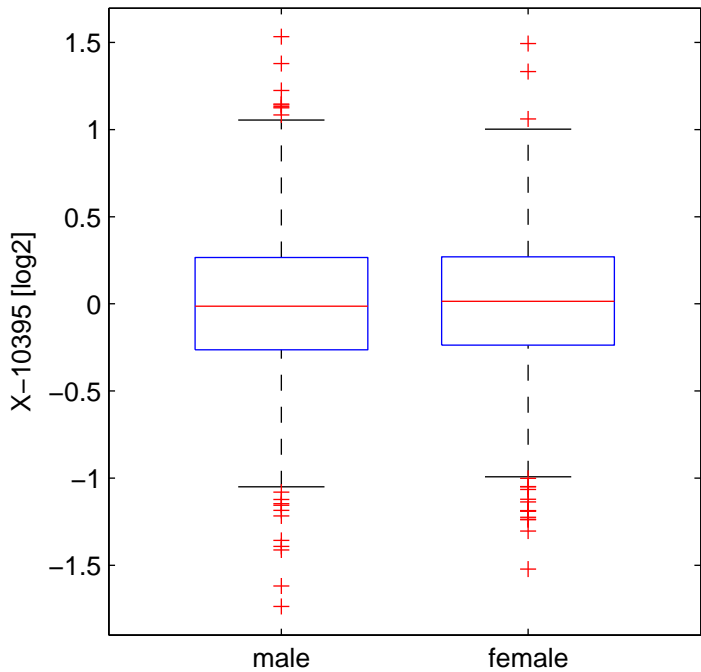



p-val: 6.76e-023

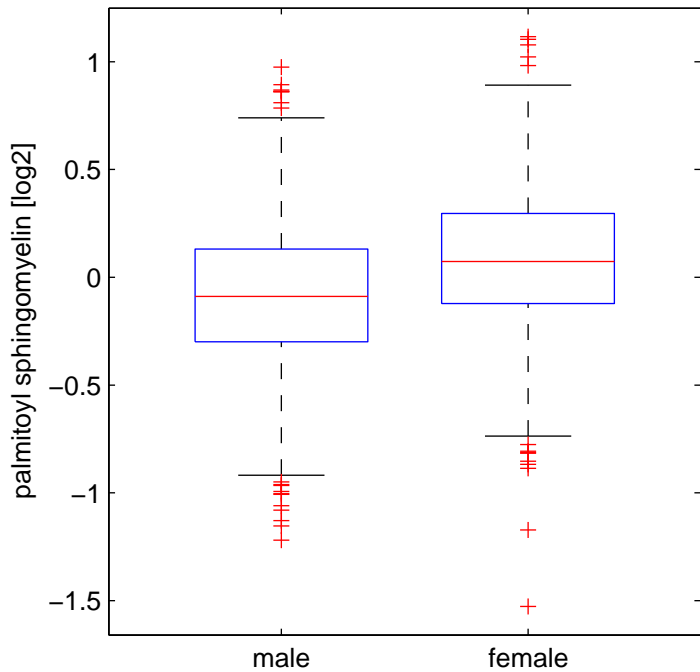

p-val: 5.43e-001

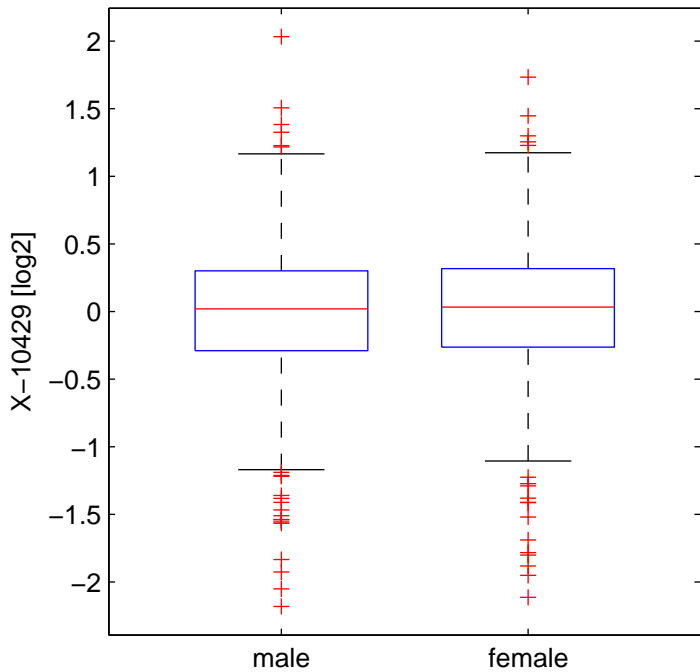

p-val: 2.59e-035

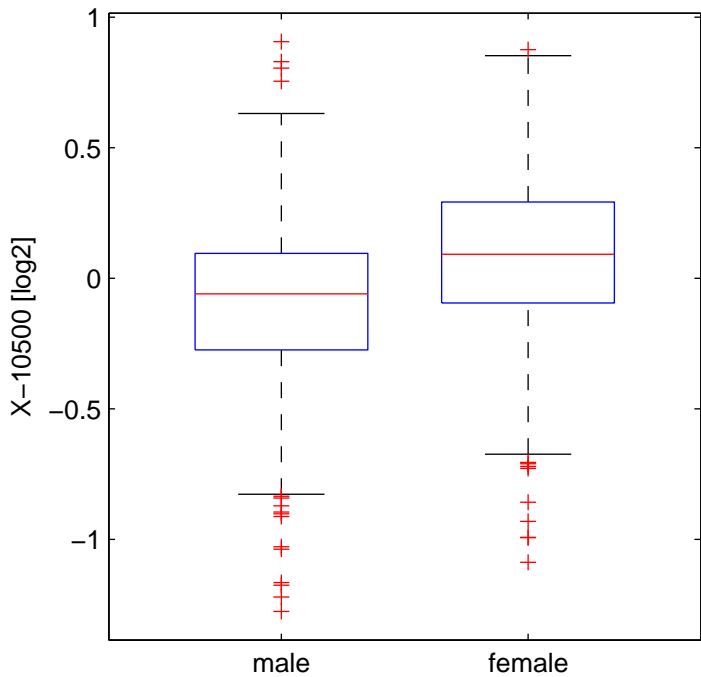

p-val: 3.70e-003

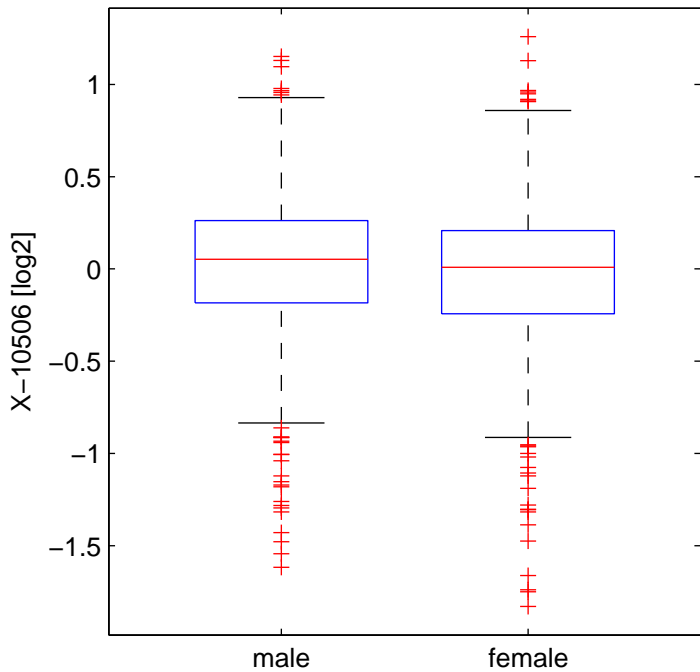

p-val: 3.29e-049

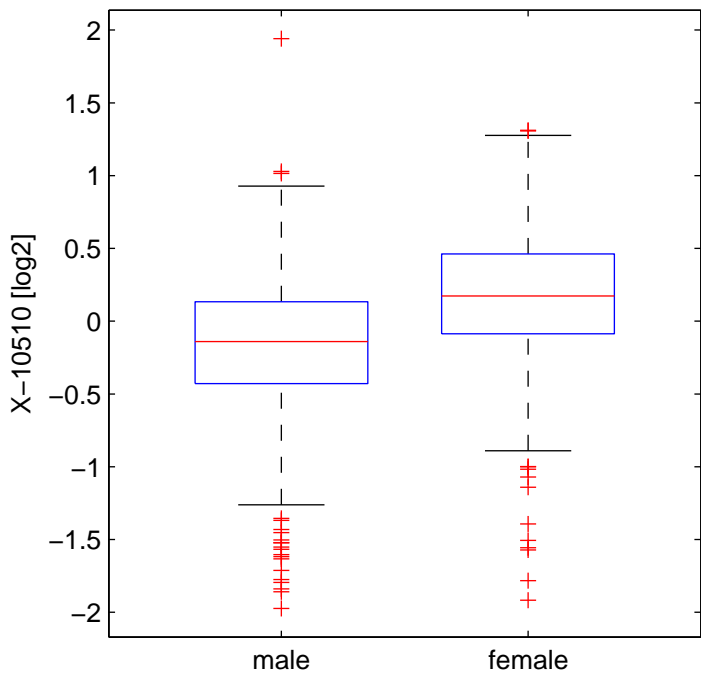

p-val: 6.59e-001

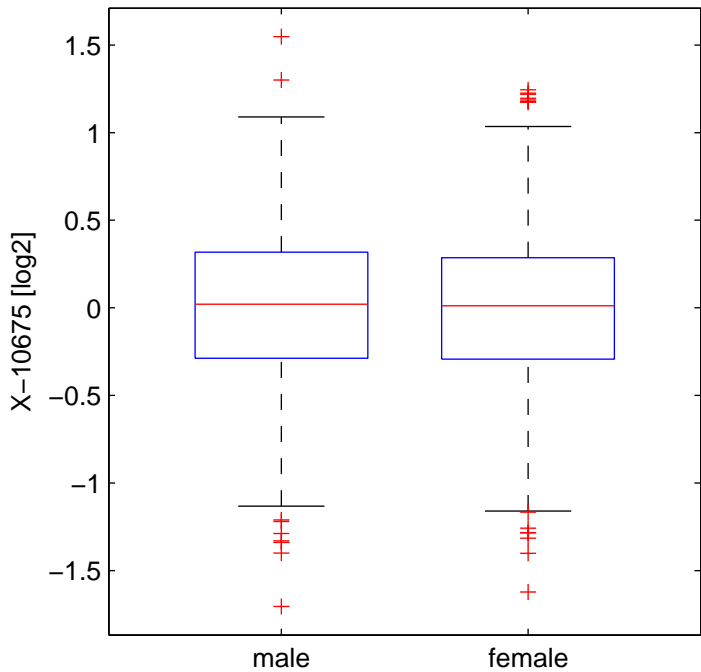

p-val: 7.12e-003

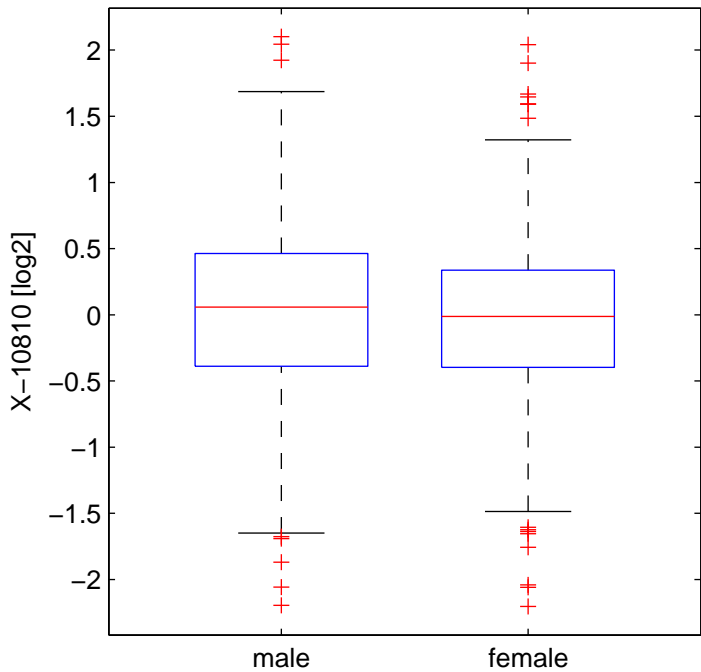

p-val: 4.98e-001

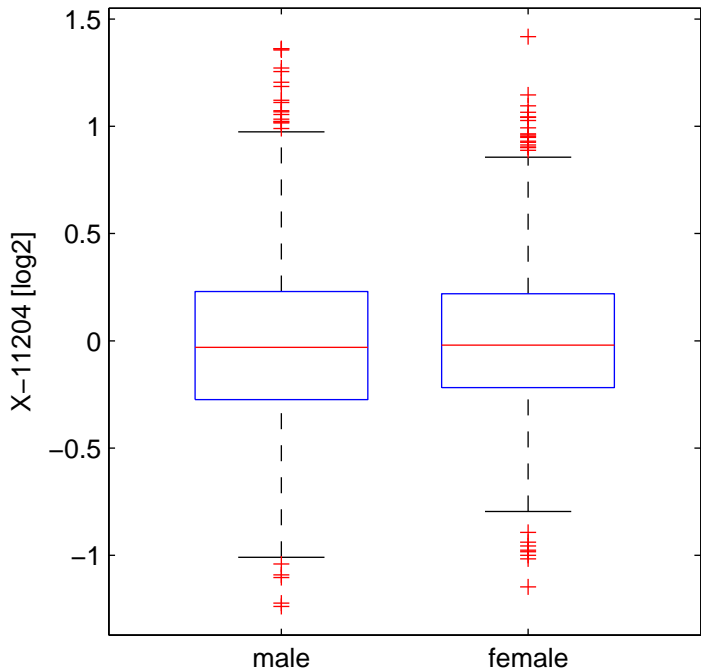



p-val: 8.38e-106

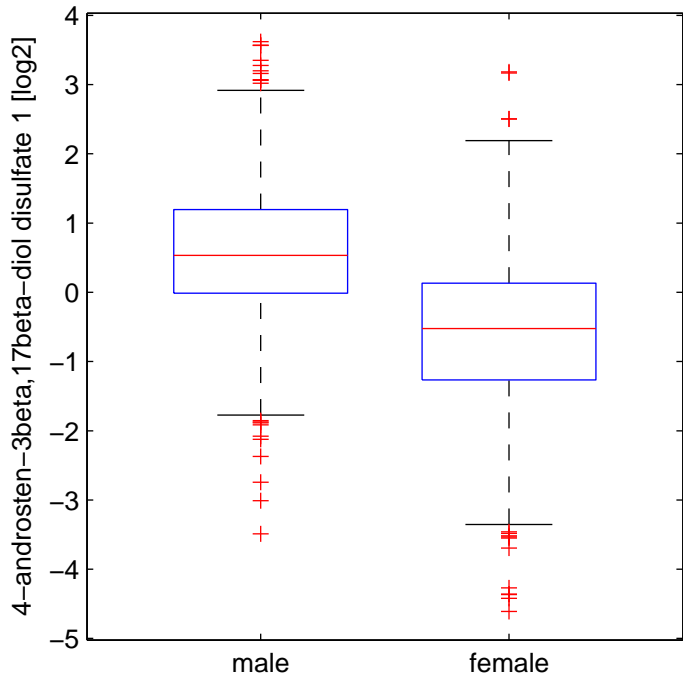

p-val: 2.84e-001

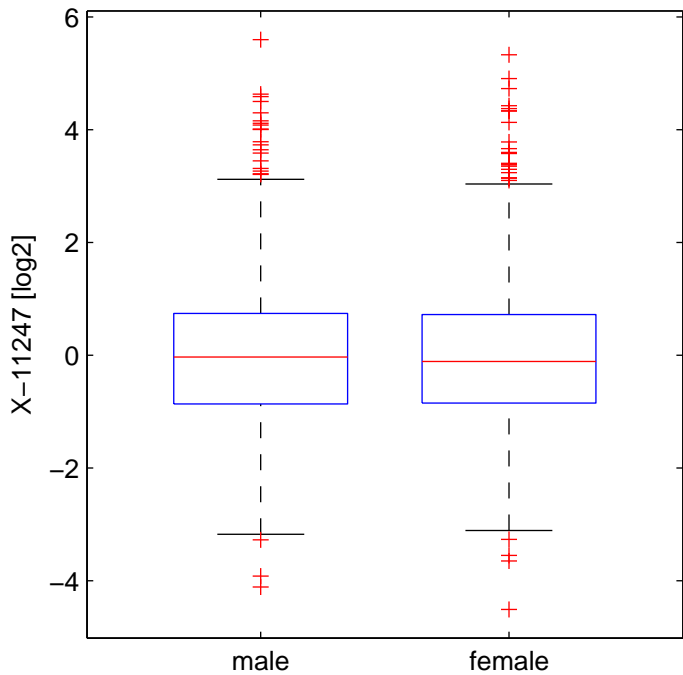

p-val: 7.41e-002

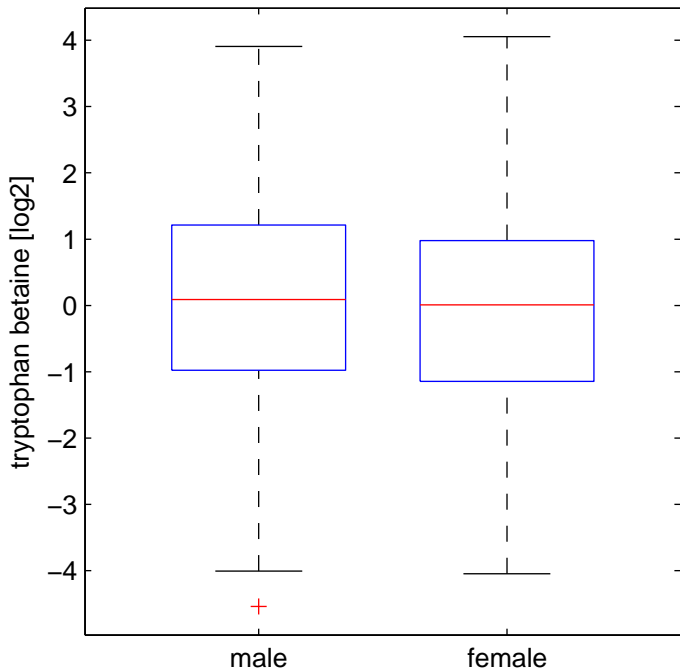

p-val: 2.88e-001

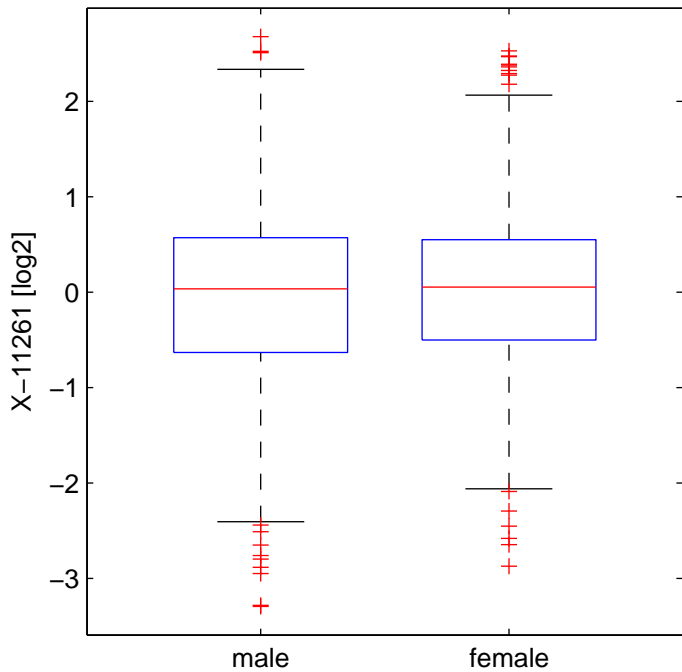

p-val: 5.09e-001

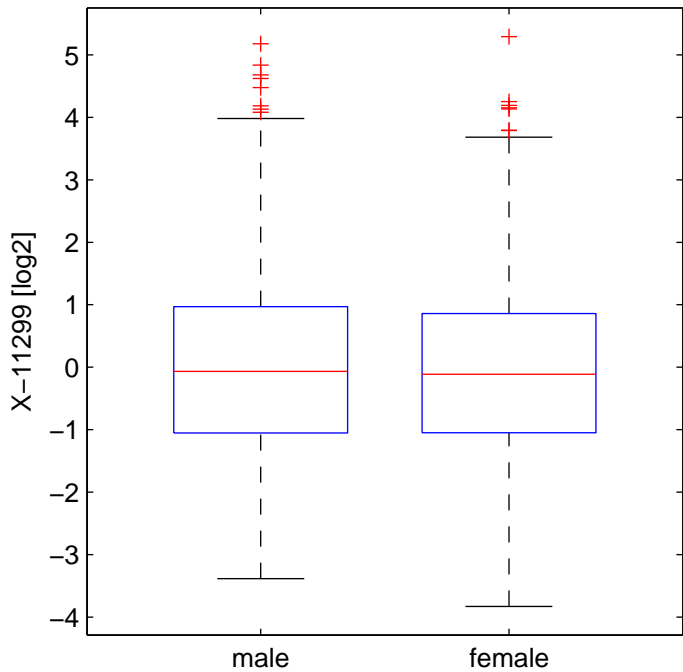

p-val: 1.25e-013

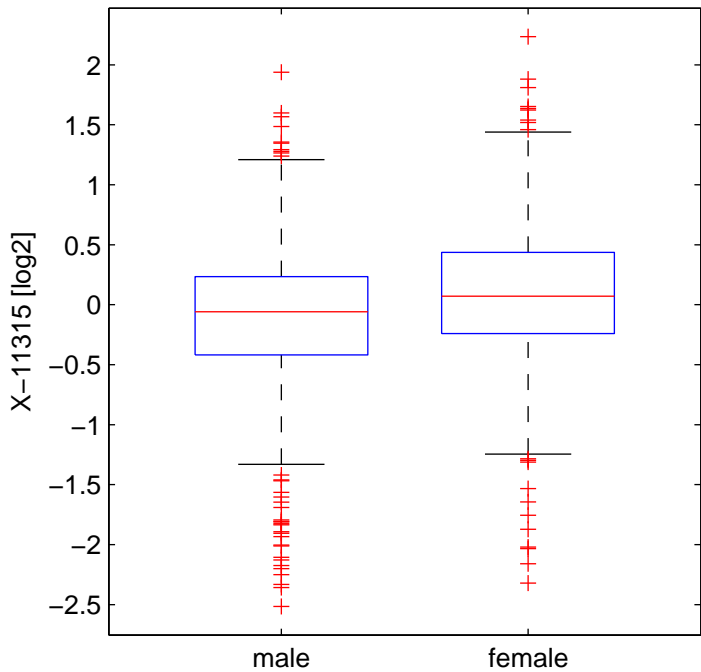

p-val: 2.11e-002

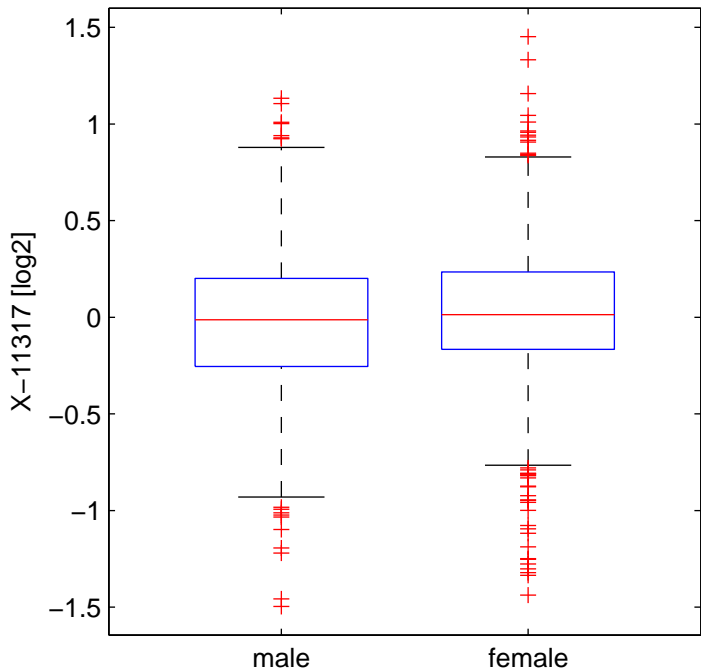

15-methyl/palmitate (isobar with 2-methyl/palmitate) [log2]

p-val: 2.27e-029

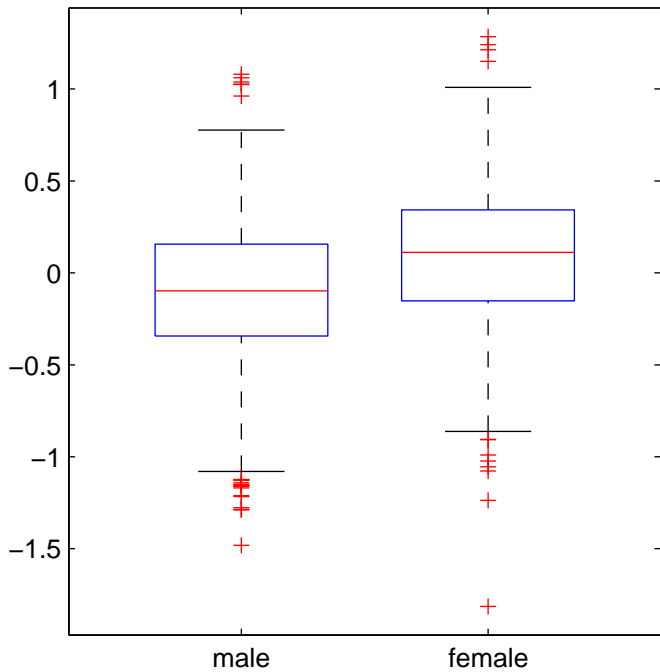



p-val: 2.60e-002

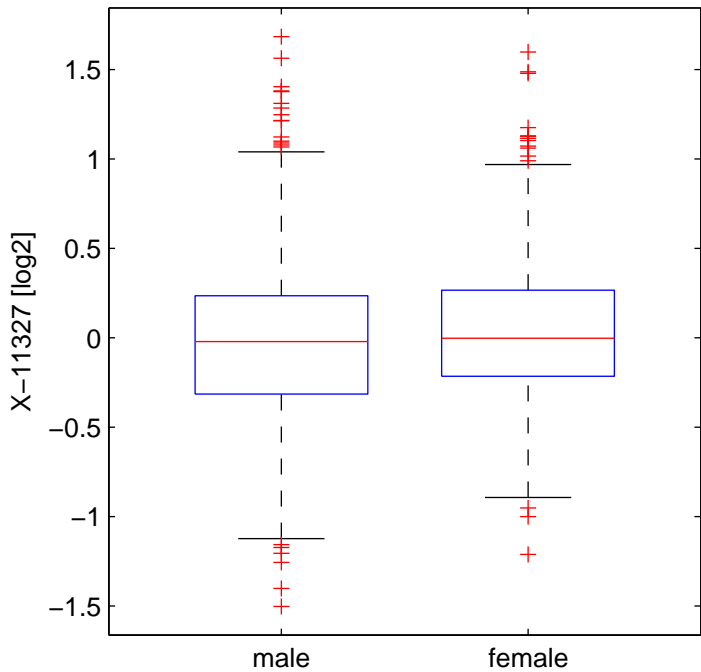

p-val: 1.59e-016

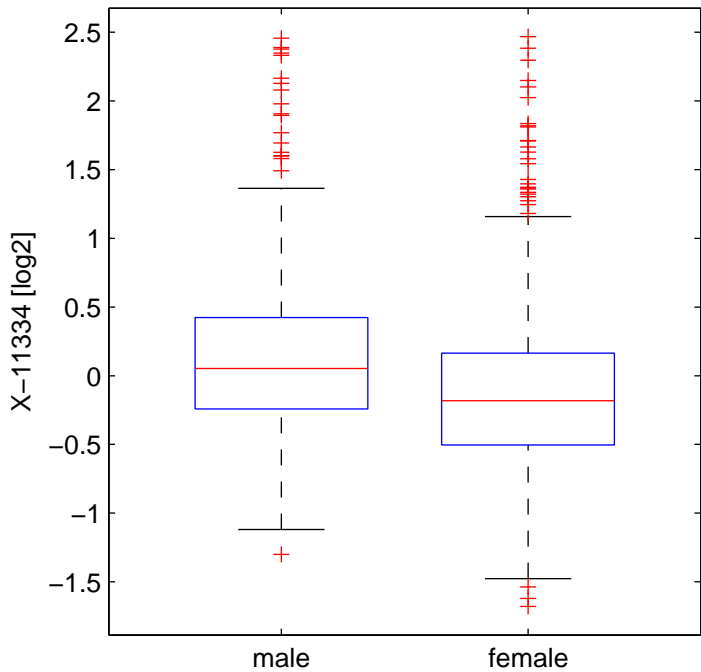

p-val: 6.95e-001

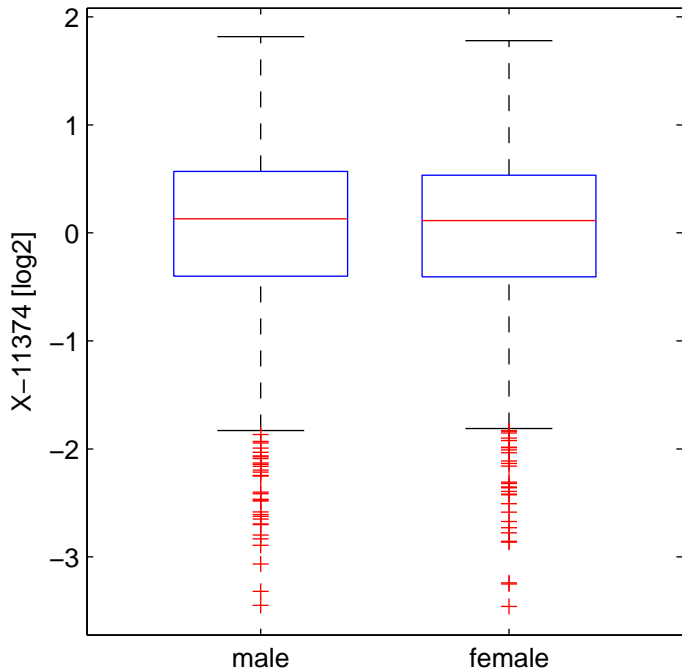

p-val: 7.74e-002

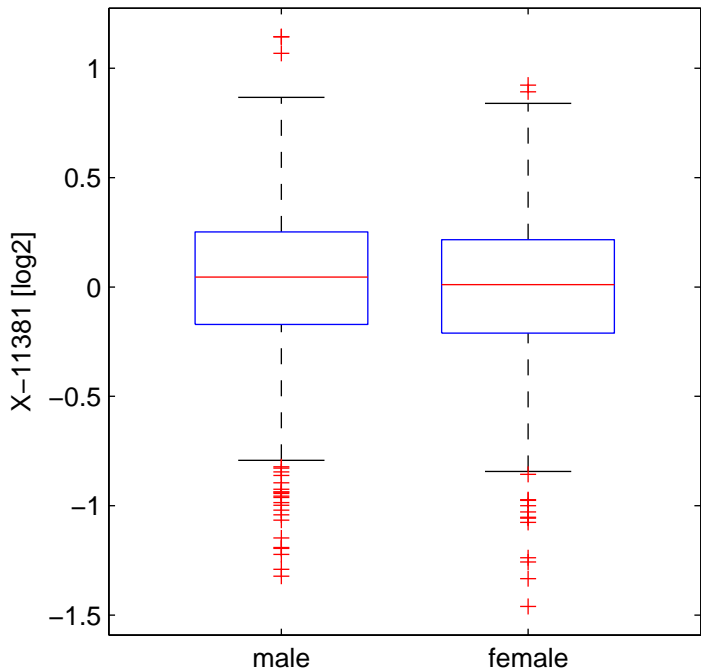

p-val: 5.48e-002

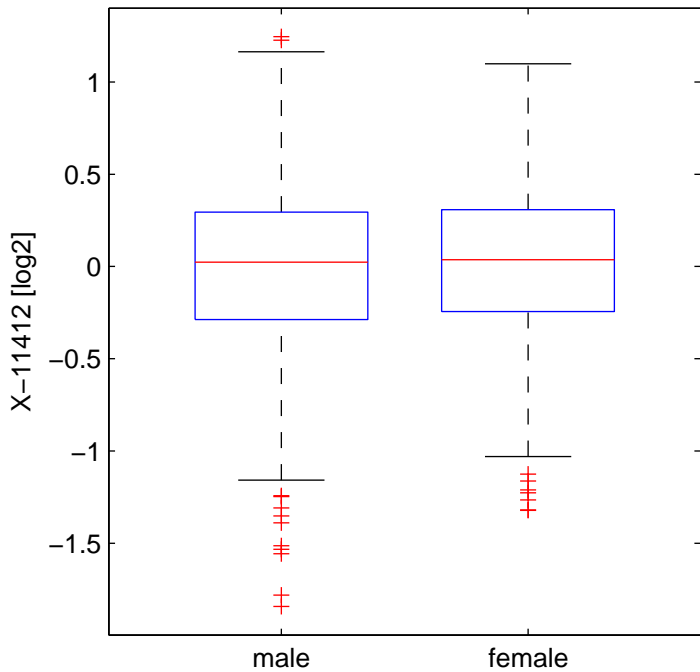

p-val: 2.51e-002

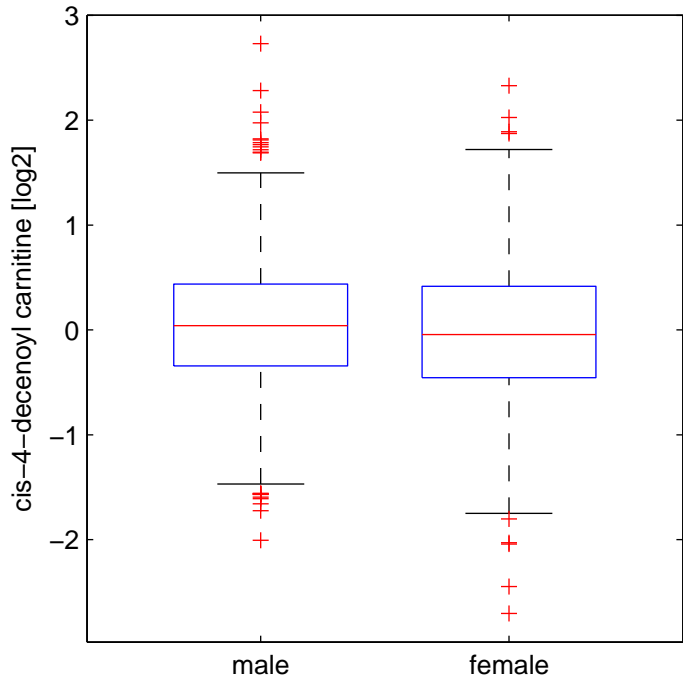

p-val: 4.84e-003

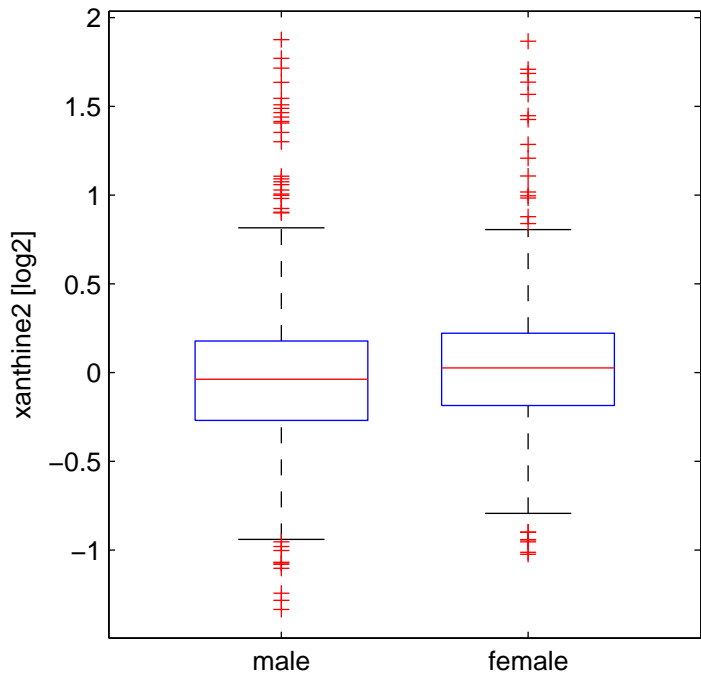

p-val: 1.45e-001

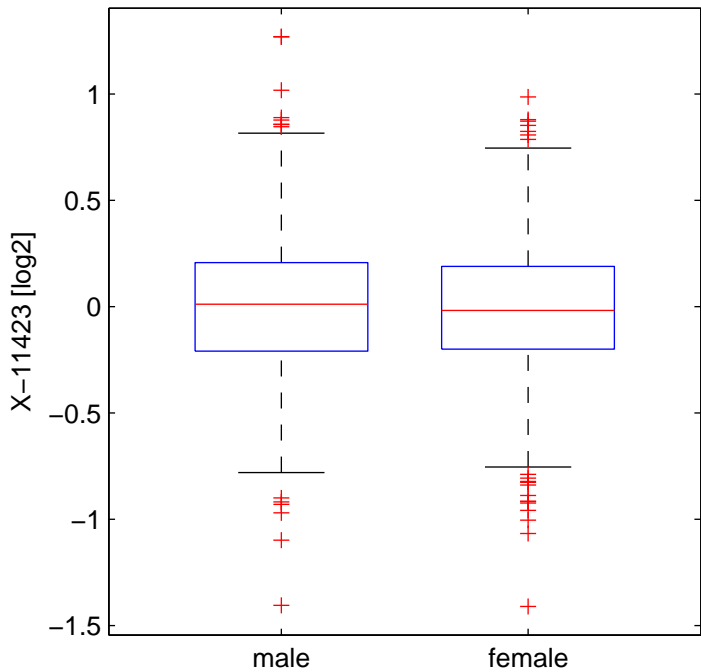



p-val: 1.13e-018

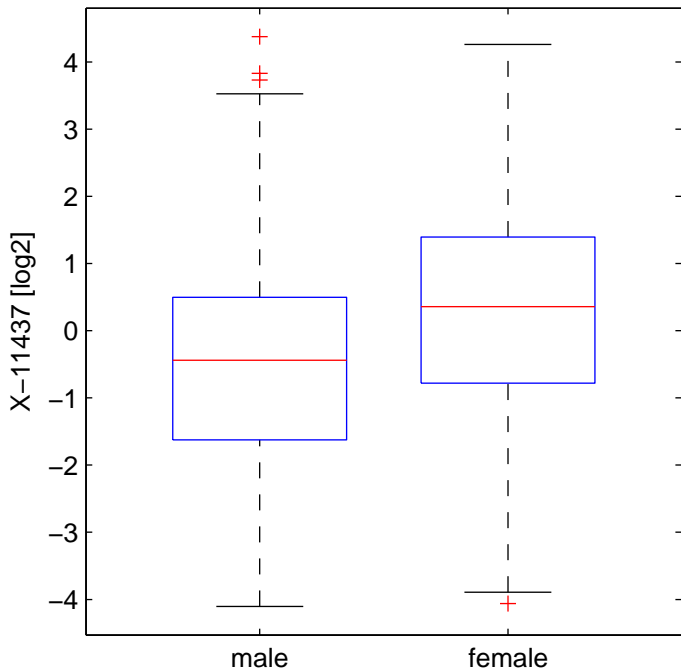

p-val: 7.11e-002

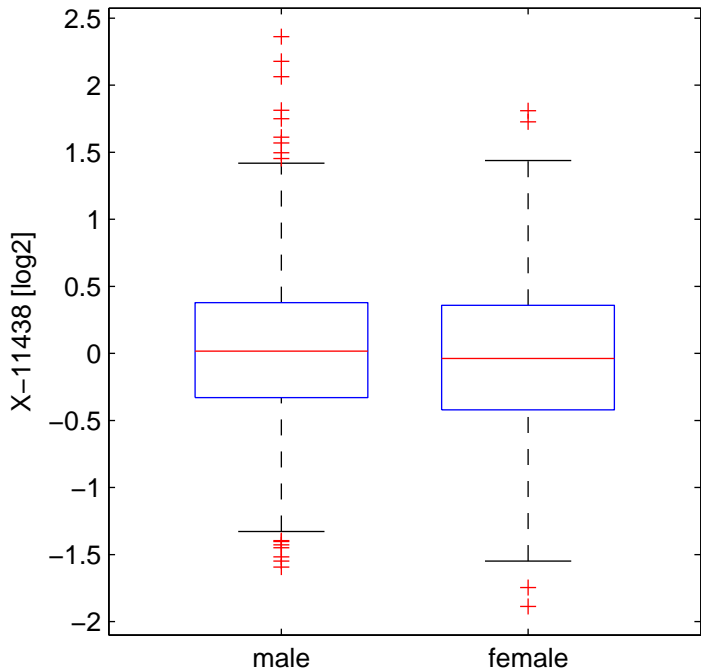

p-val: 7.46e-089

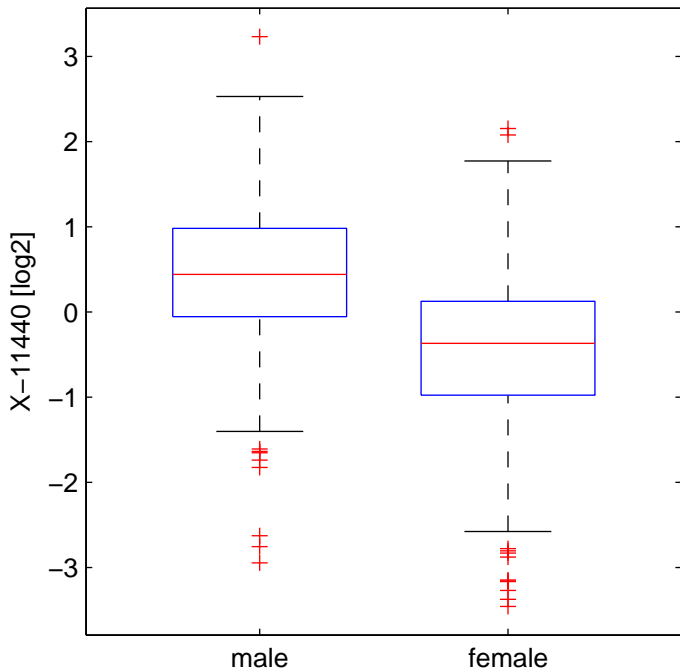

p-val: 1.20e-010

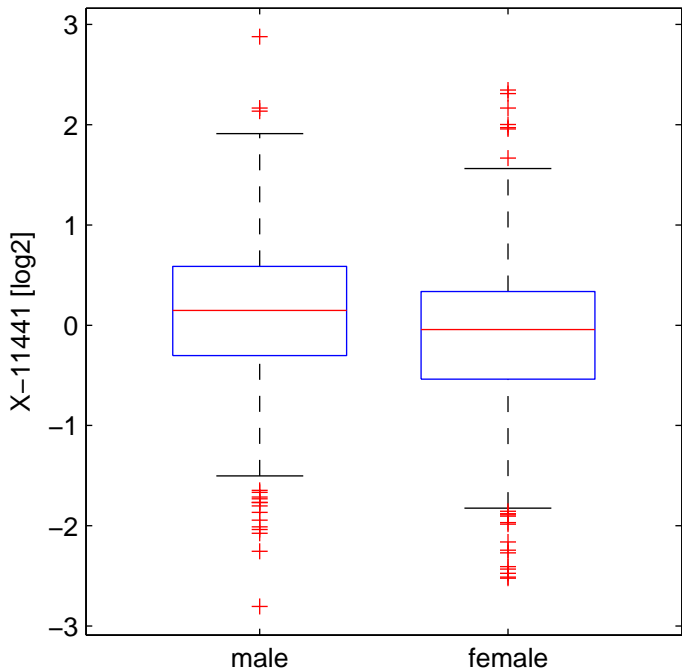

p-val: 2.41e-013

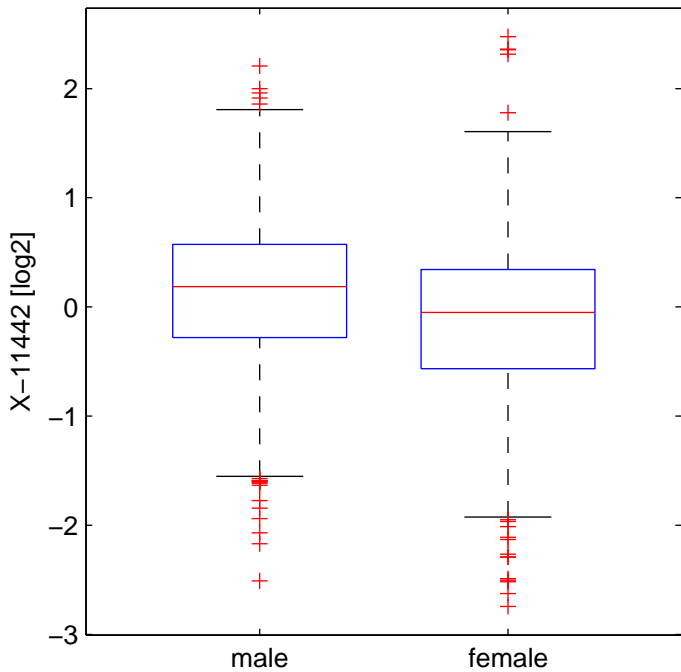

p-val: 1.71e-193

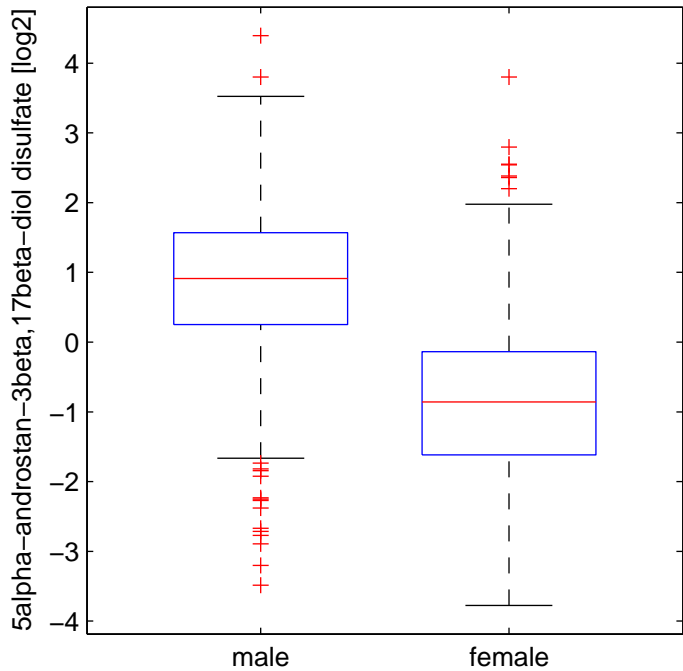

p-val: 8.04e-035

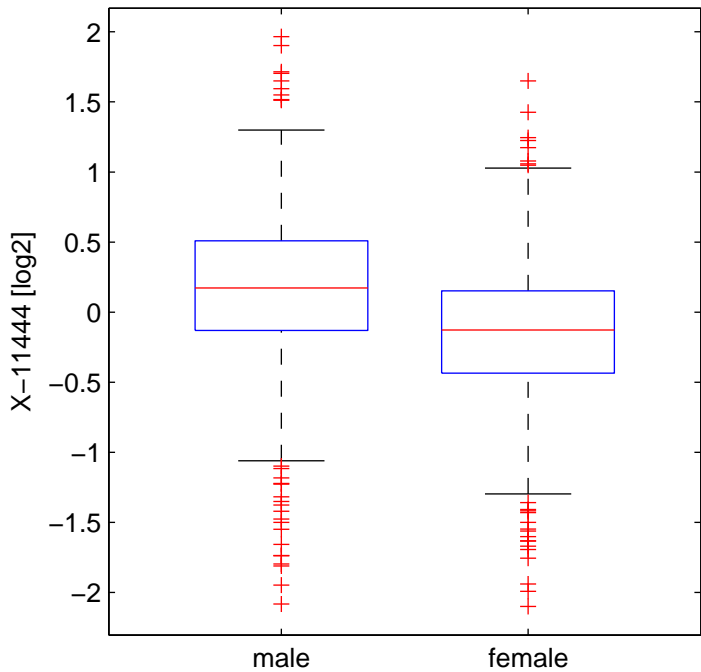

p-val: 4.17e-002

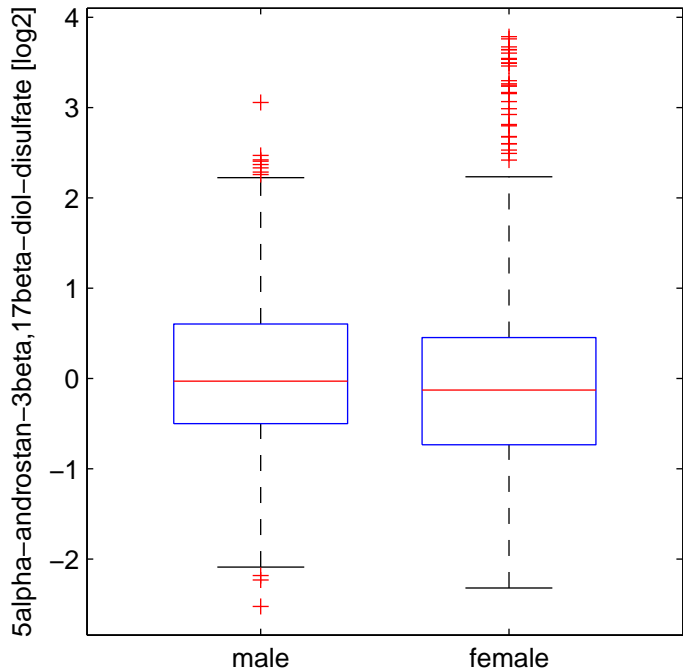



p-val: 2.92e-088

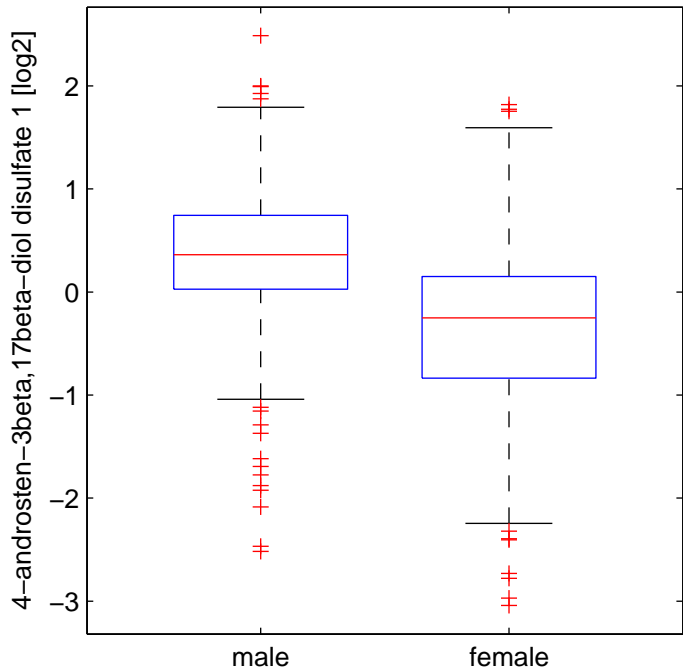

p-val: 1.63e-018

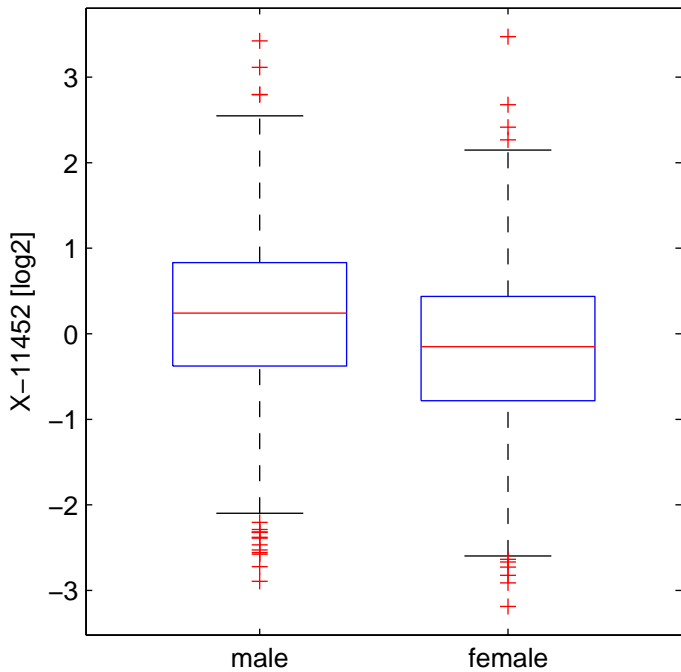

p-val: 1.64e-001

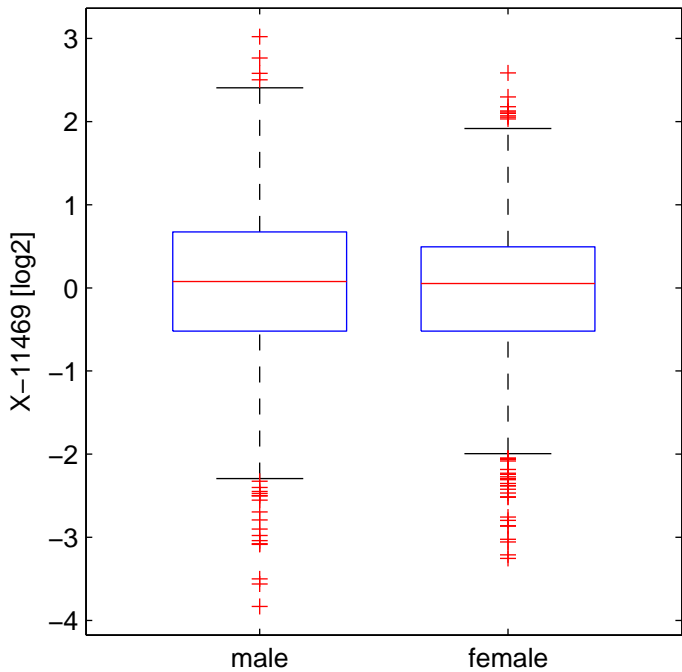

p-val: 2.47e-014

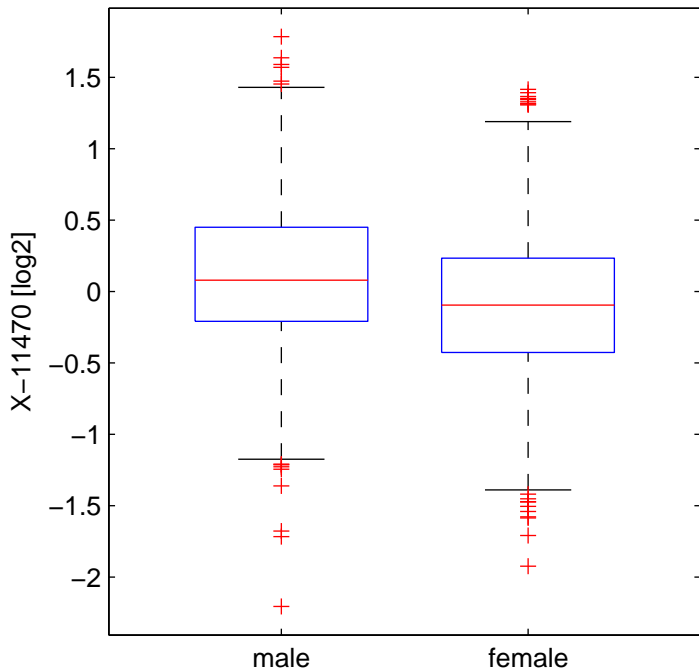

p-val: 4.59e-001

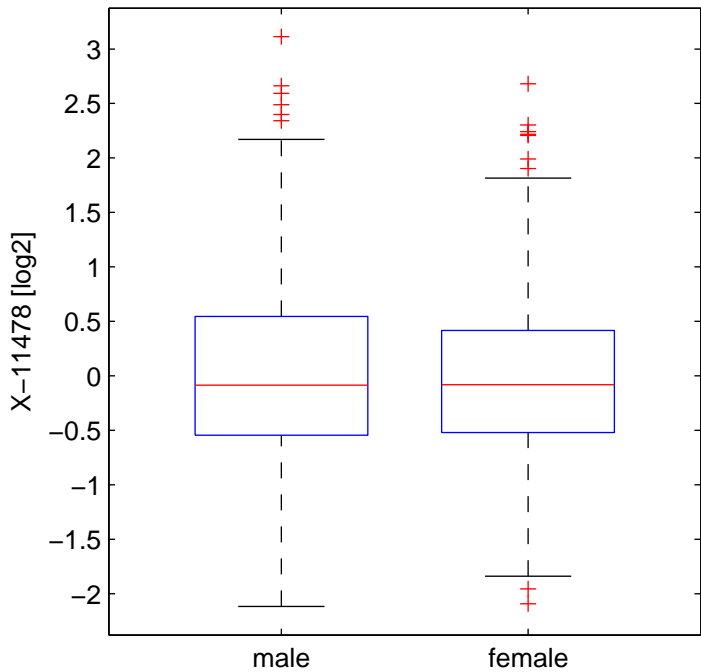

p-val: 8.38e-001

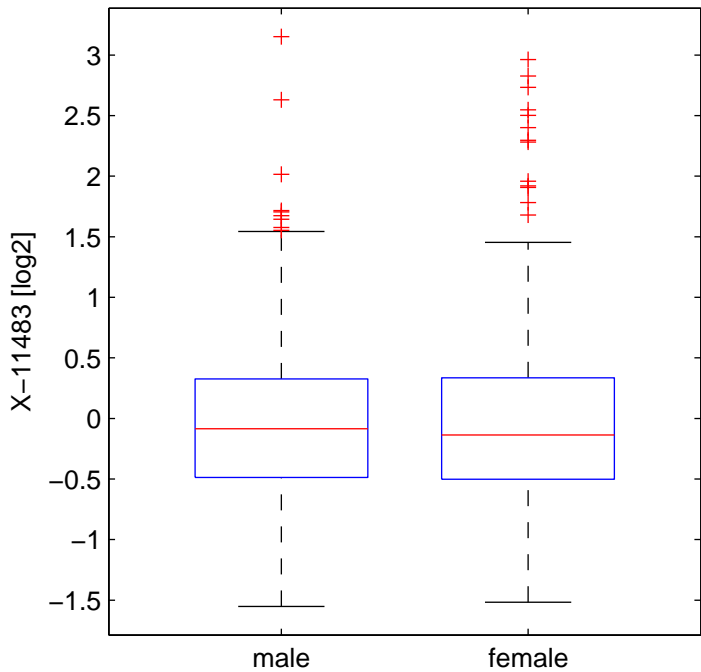

p-val: 1.07e-023

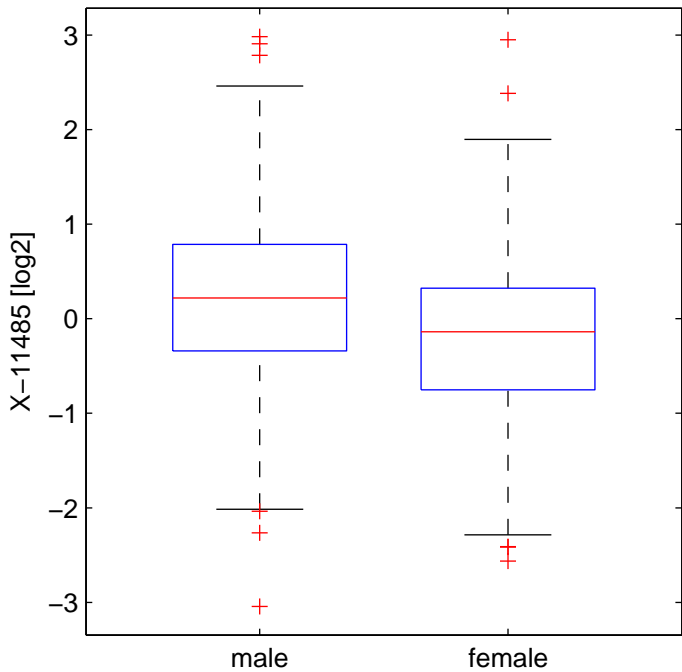

p-val:  $9.56e-007$

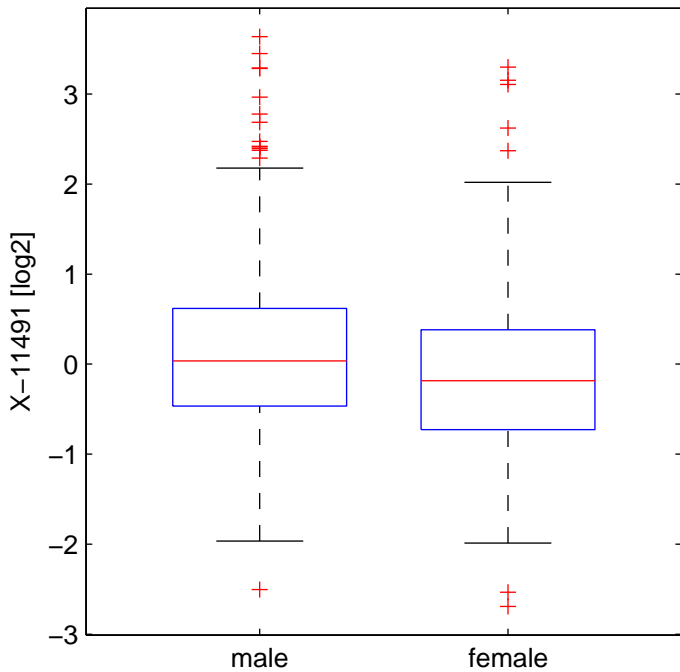



p-val: 2.46e-004

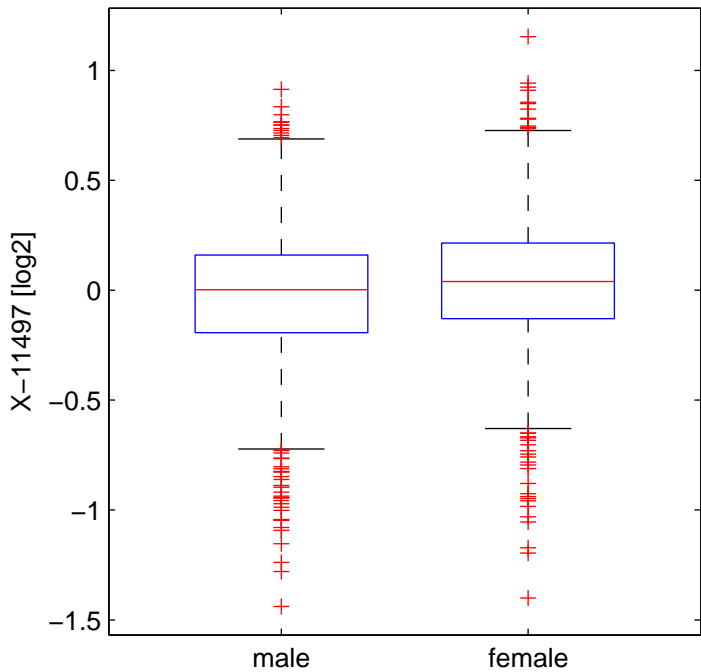

p-val: 1.36e-003

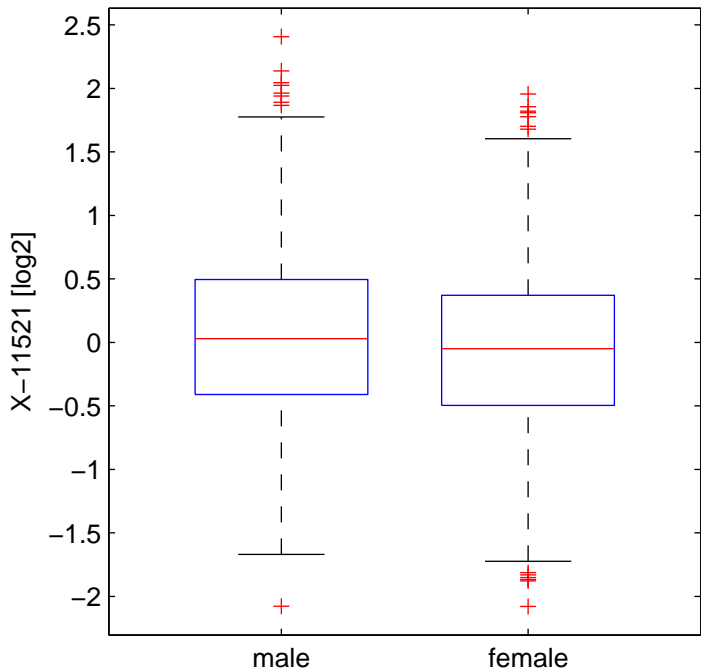

p-val: 9.29e-013

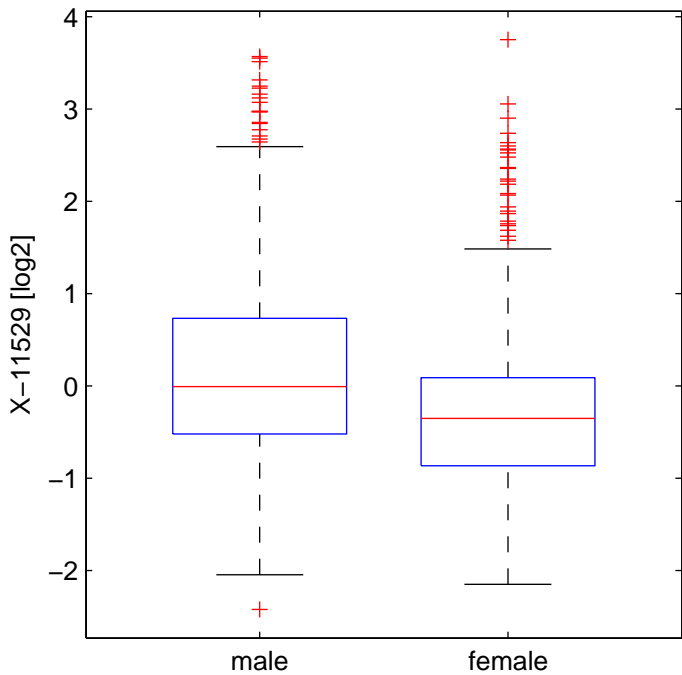

p-val: 4.99e-011

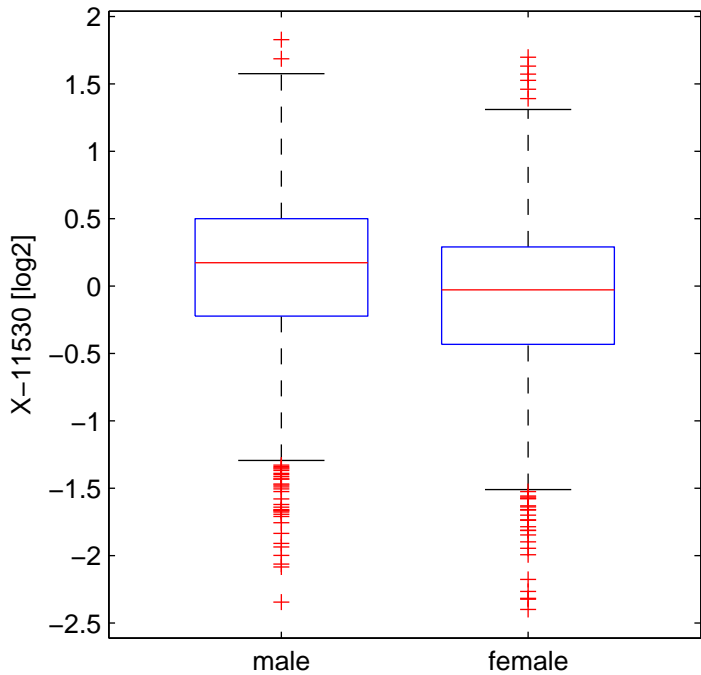

p-val: 1.16e-001

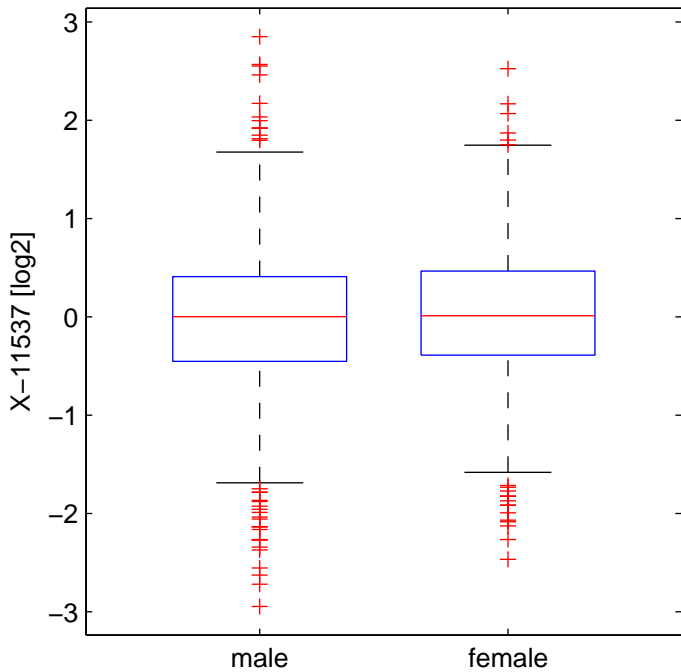

p-val: 1.41e-009

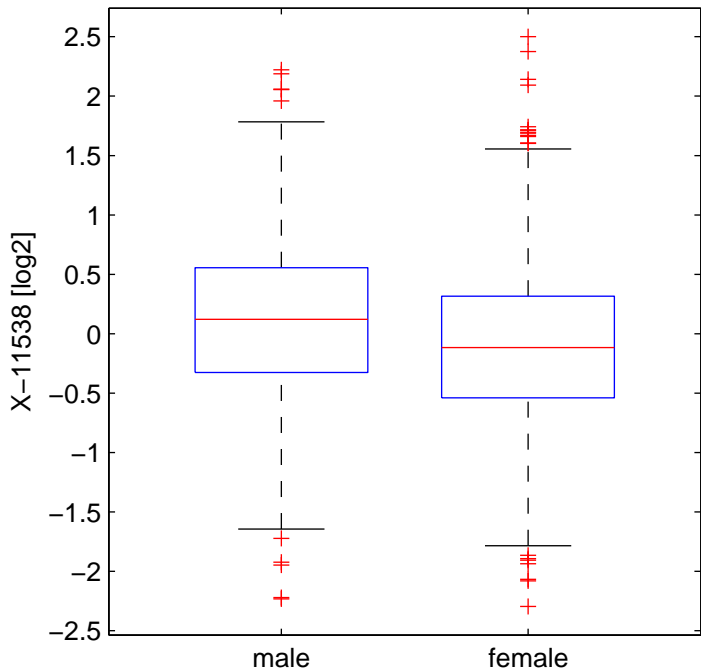

p-val: 8.57e-002

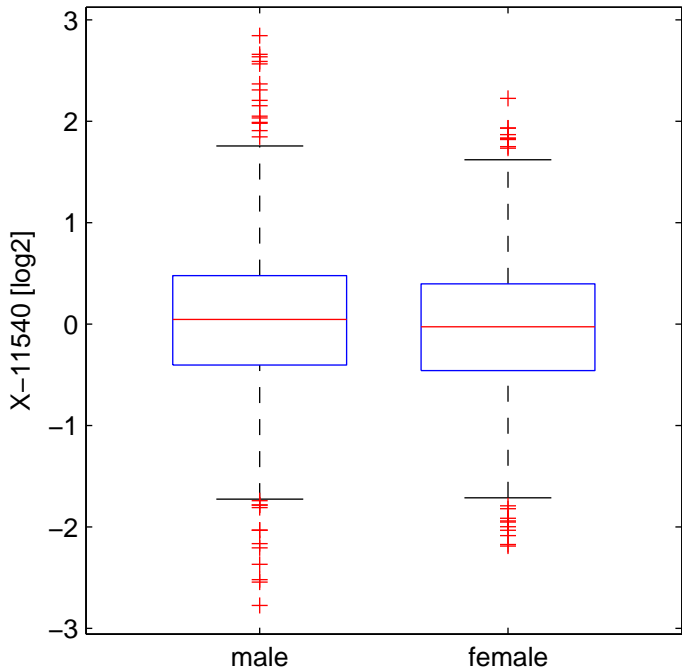

p-val: 6.50e-005

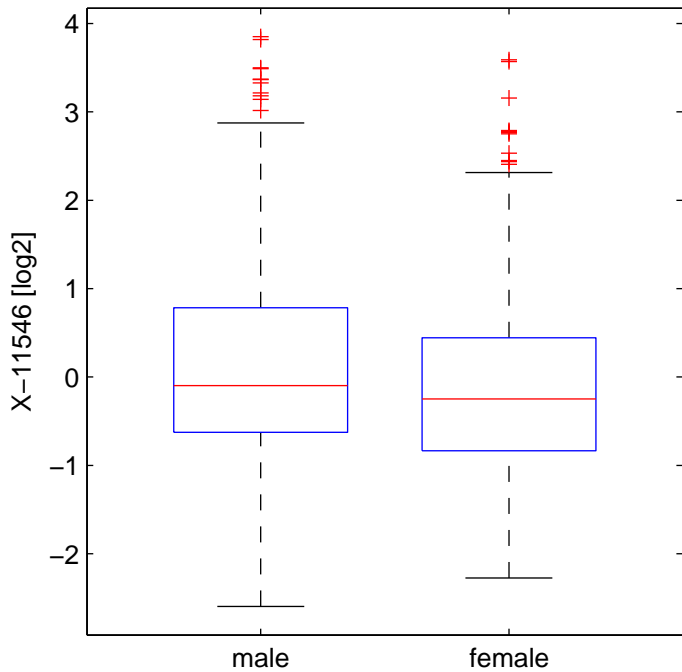



p-val: 5.75e-001

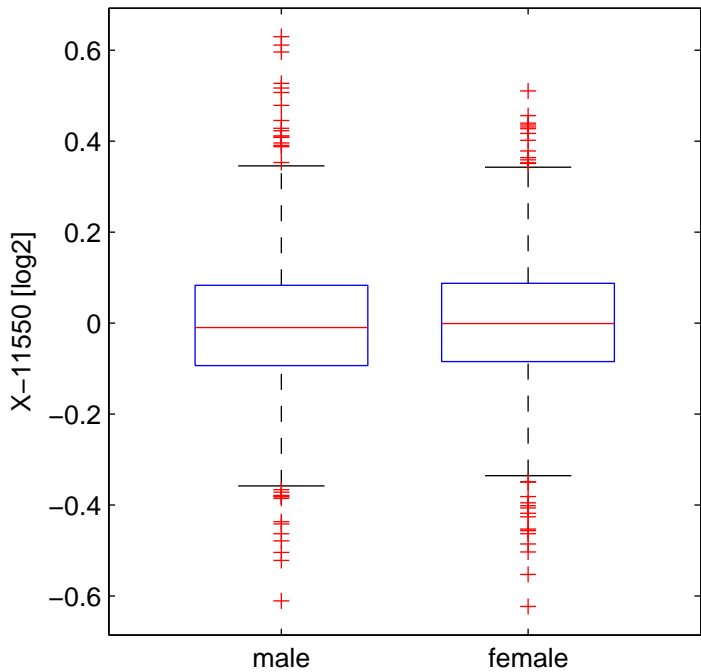

p-val: 3.94e-001

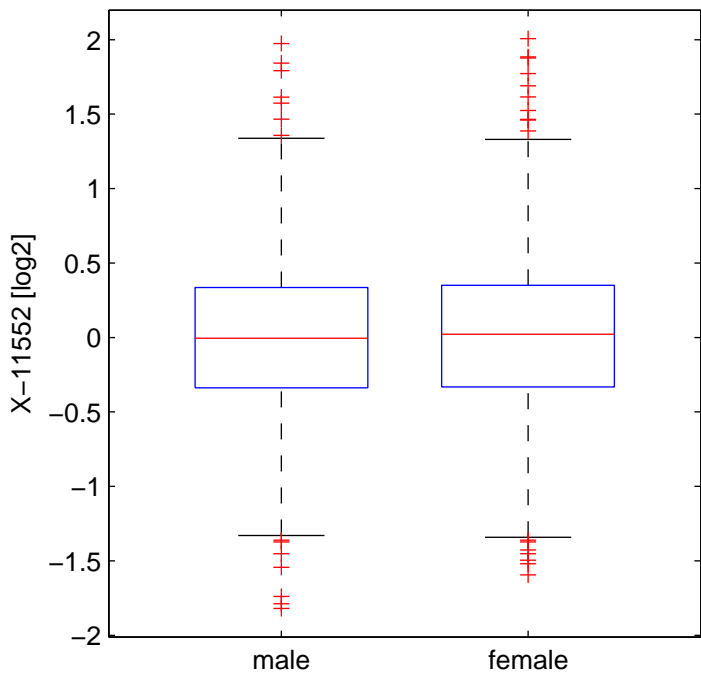

p-val: 1.22e-002

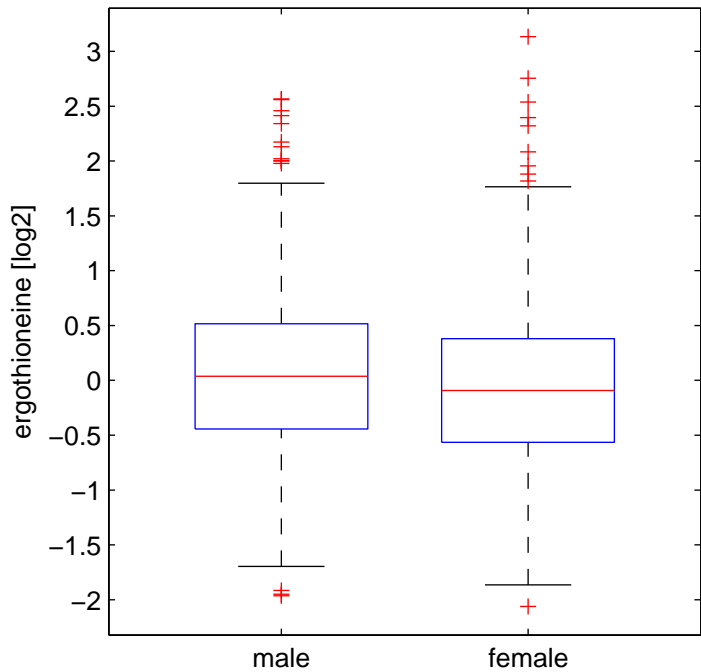

p-val: 6.98e-001

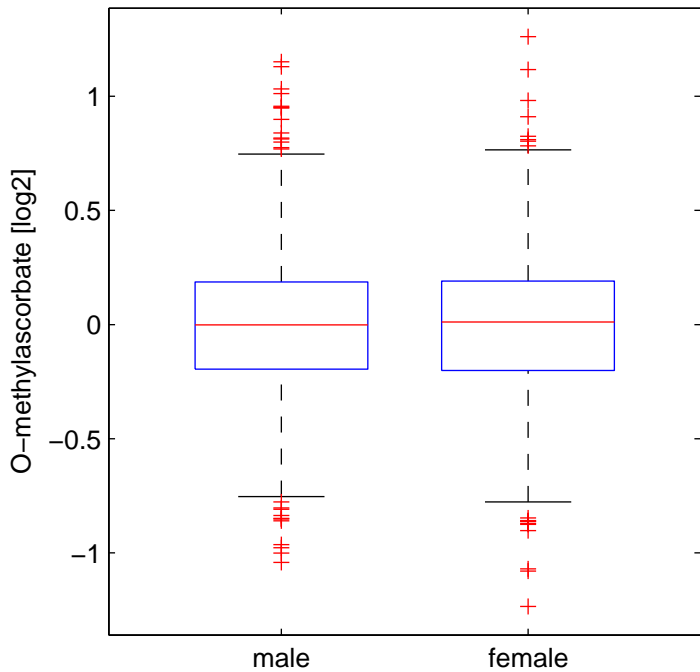

p-val: 5.83e-001

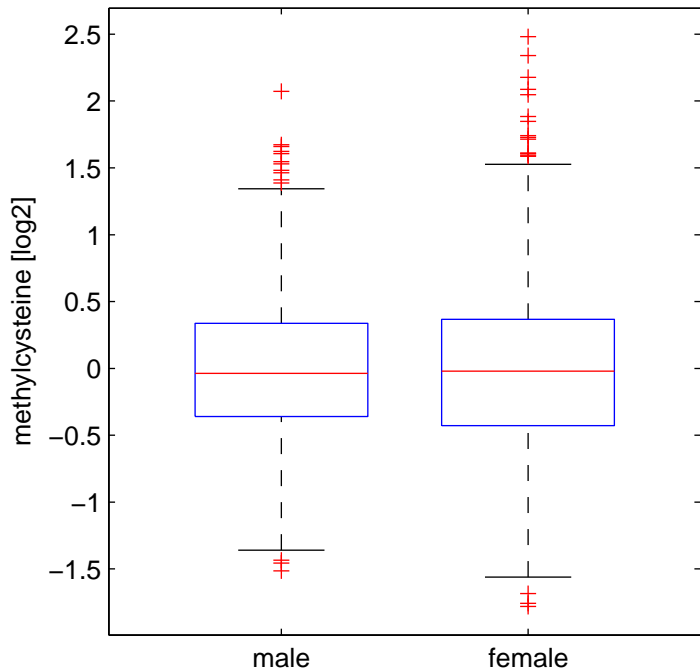

p-val: 5.00e-019

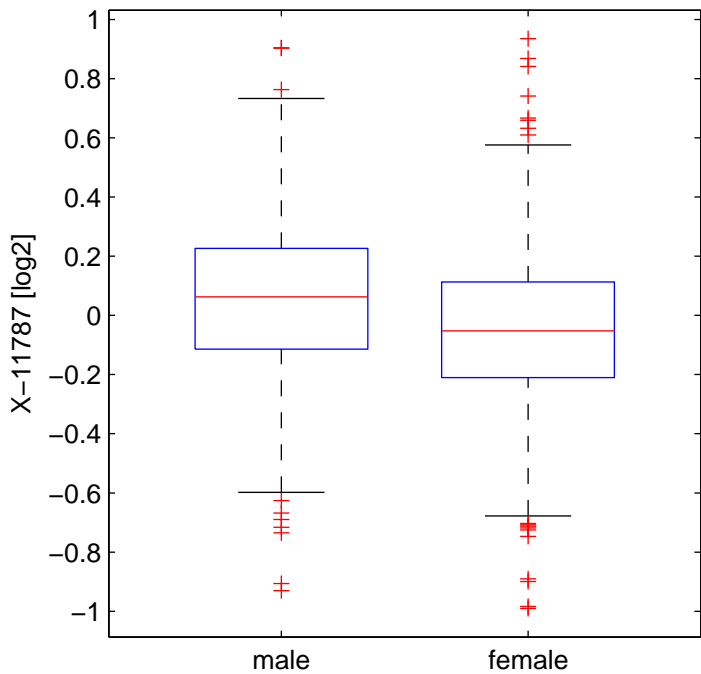

p-val: 1.75e-002

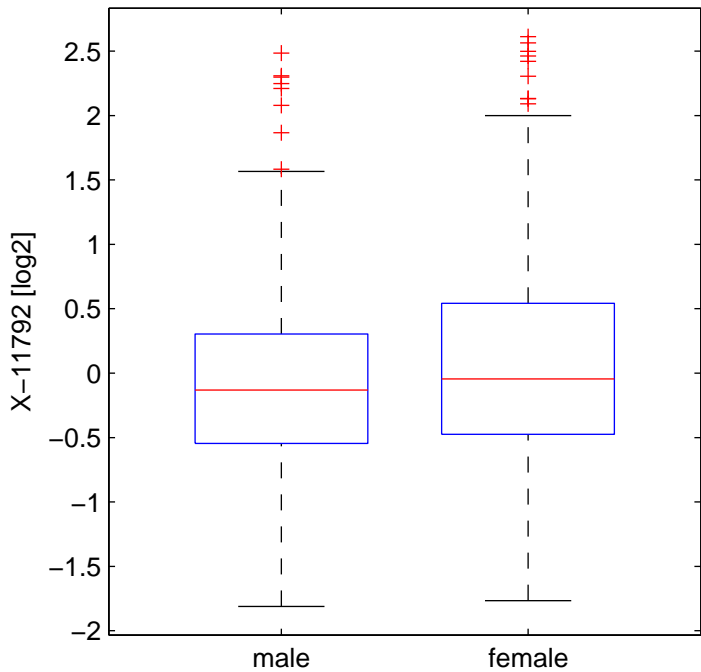

p-val: 2.88e-004

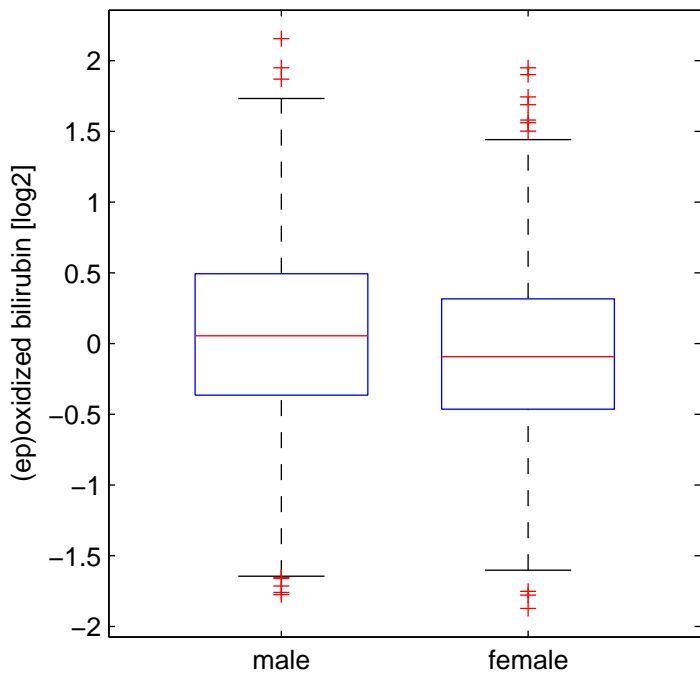



p-val:  $7.95e-018$

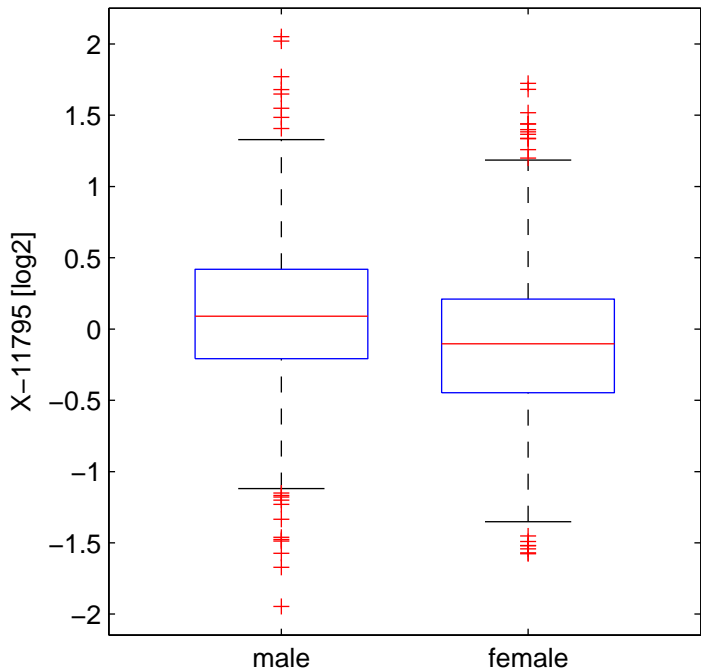

p-val: 2.98e-001

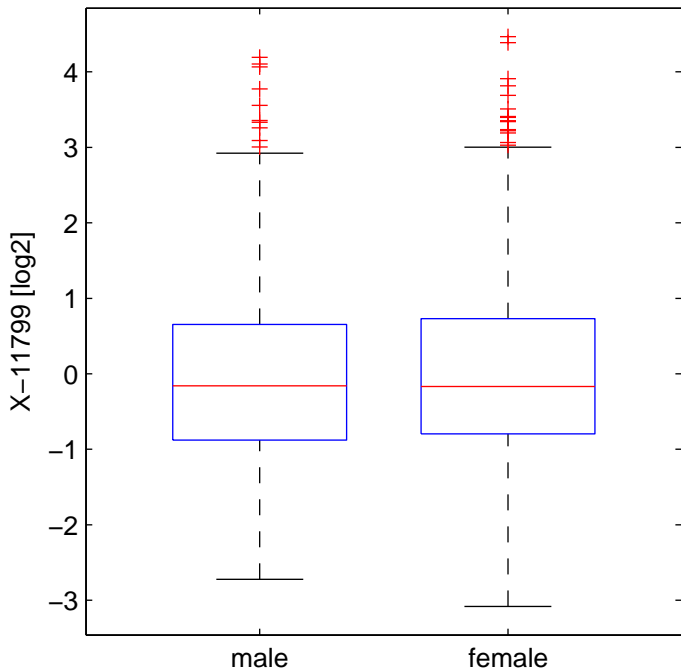

p-val: 1.47e-001

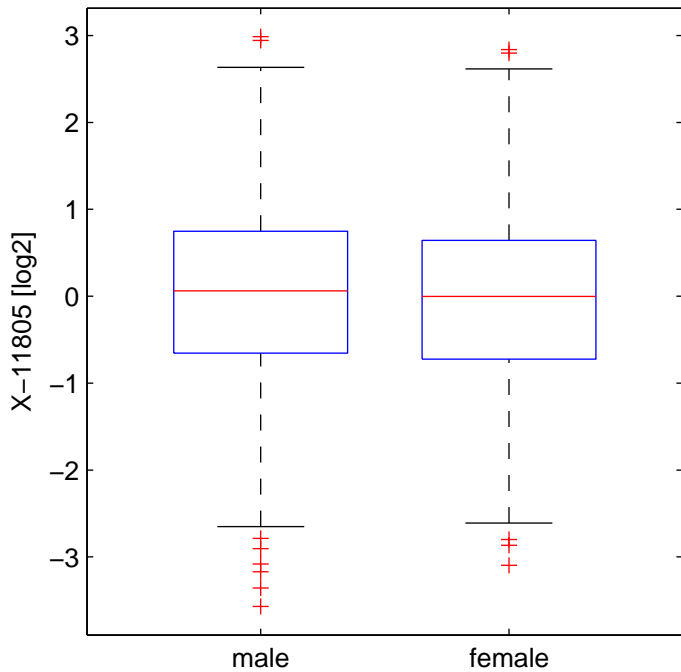

p-val: 2.54e-003

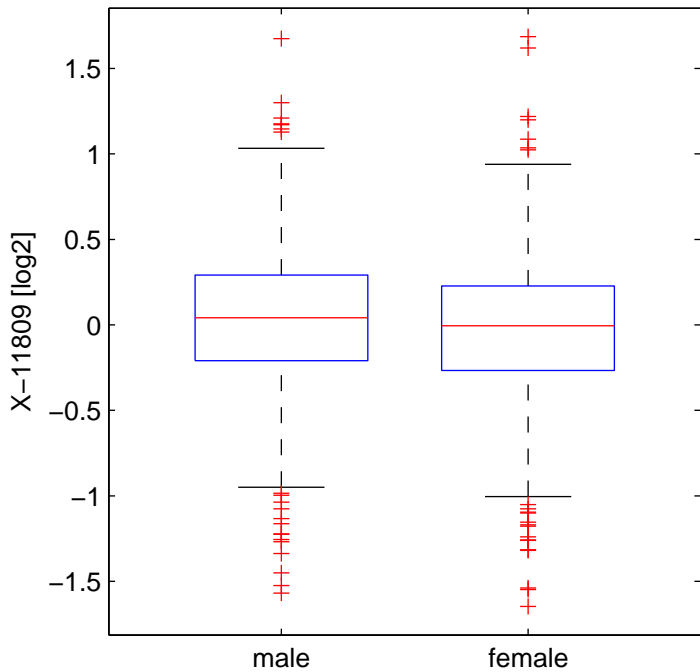

p-val: 2.31e-005

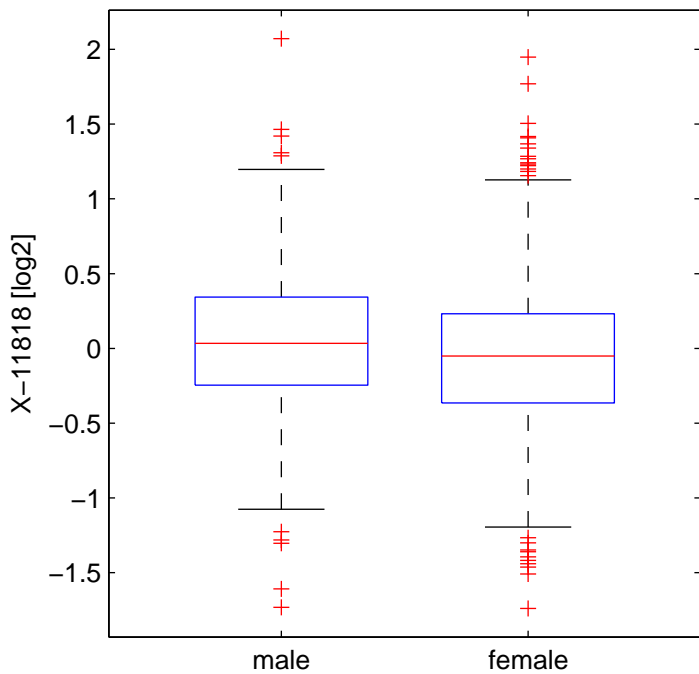

p-val: 1.06e-001

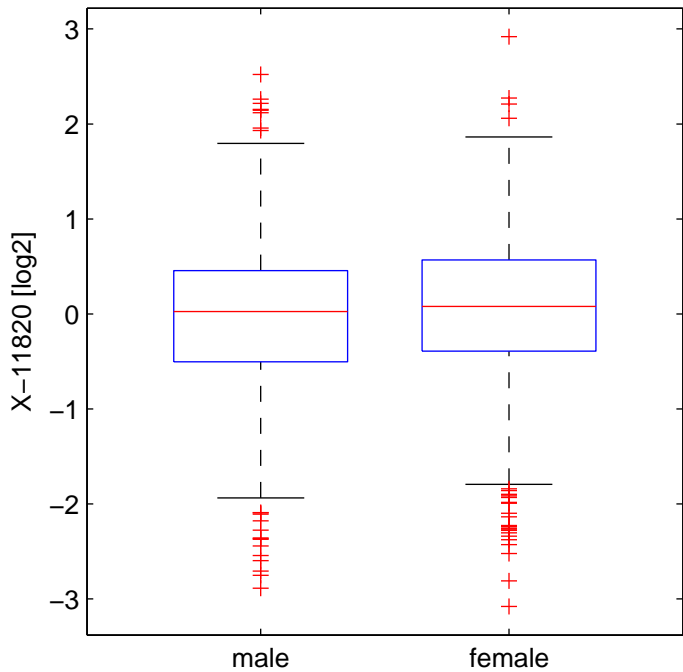

p-val: 1.87e-003

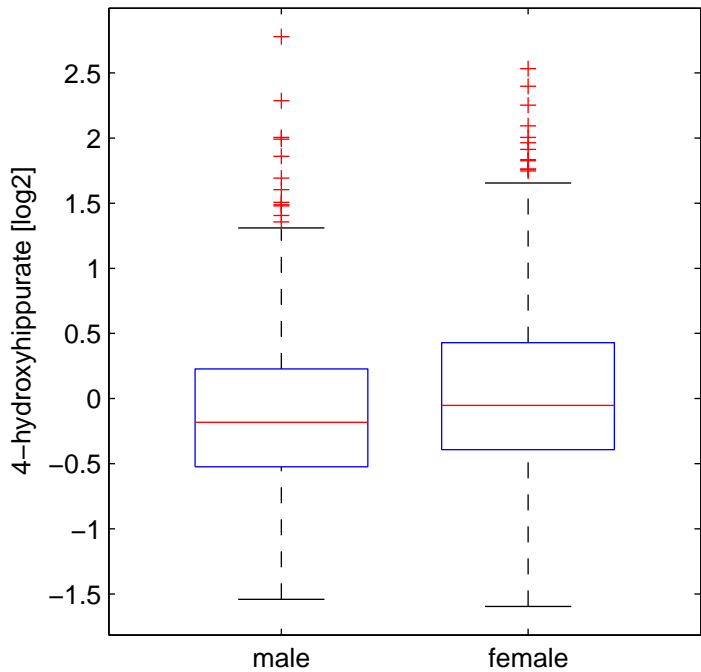

p-val: 9.66e-001

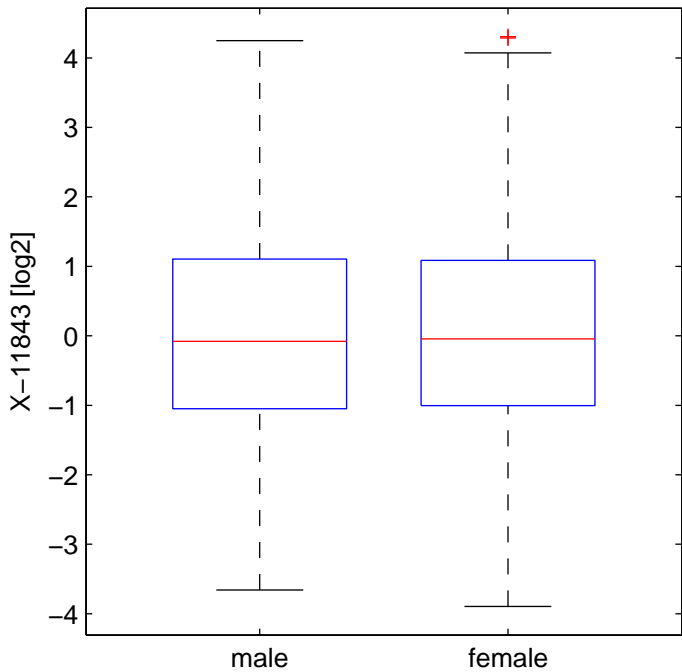



p-val: 2.17e-002

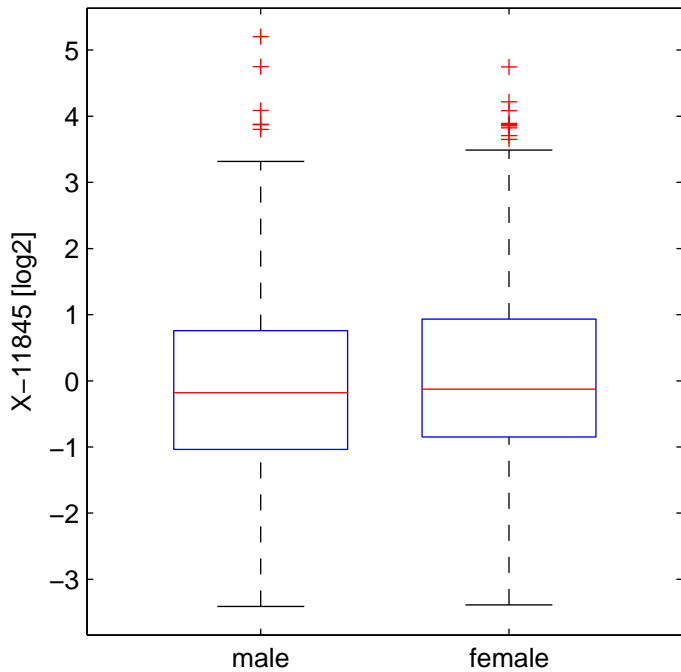

p-val: 1.45e-002

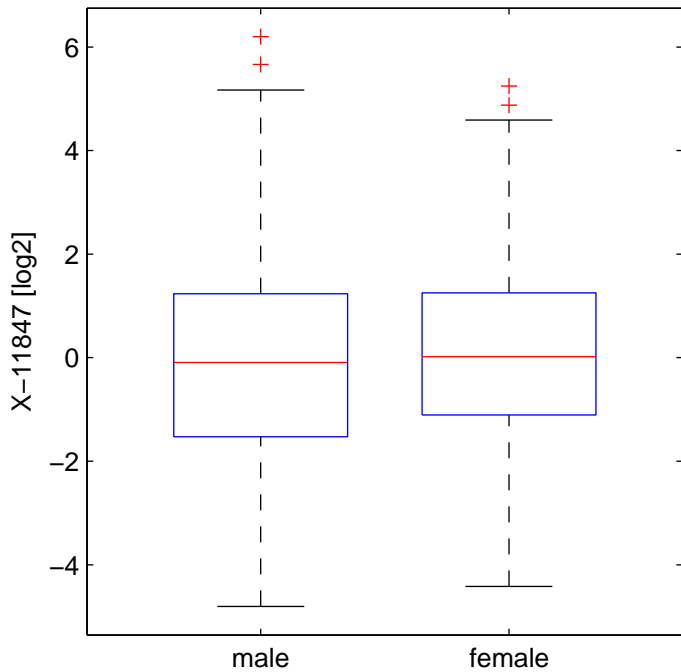

p-val: 5.69e-005

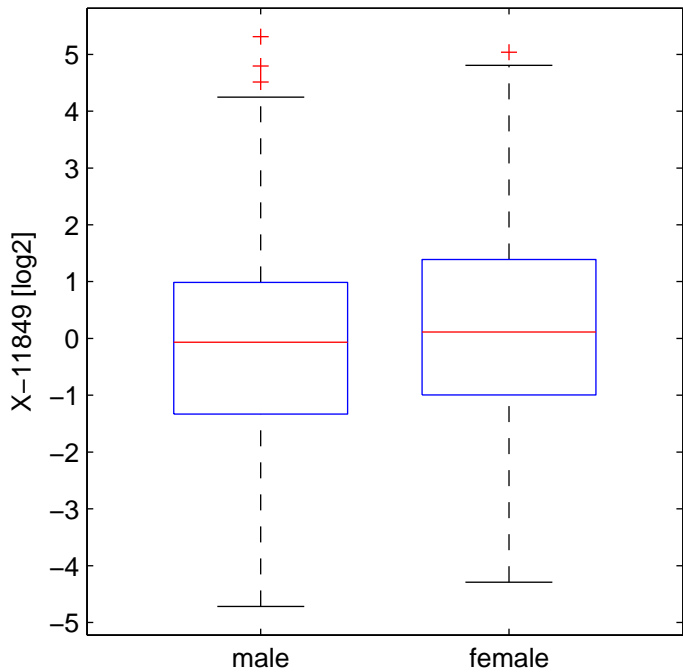

p-val: 2.23e-001

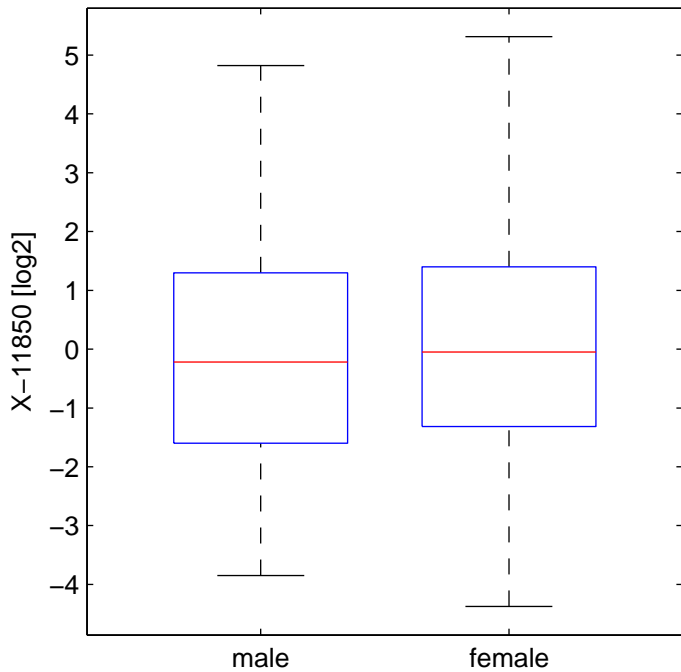

p-val: 1.20e-003

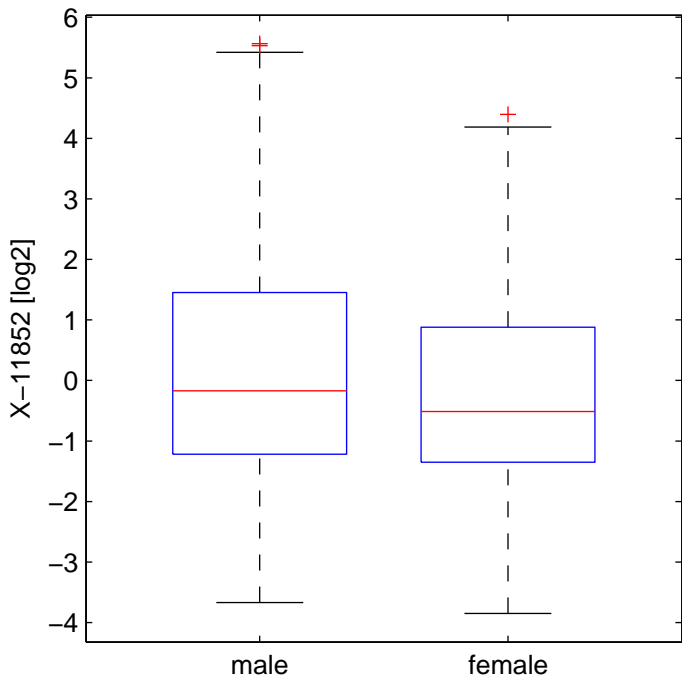

p-val: 5.45e-001

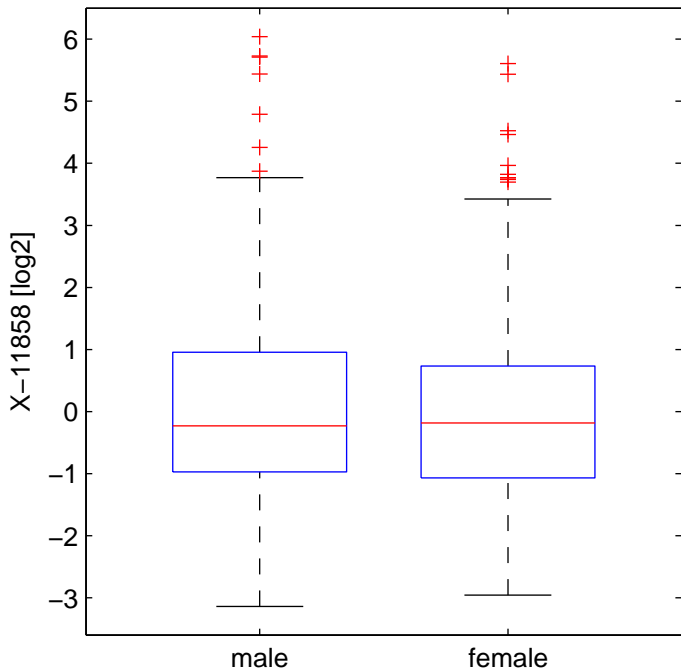

p-val: 2.09e-004

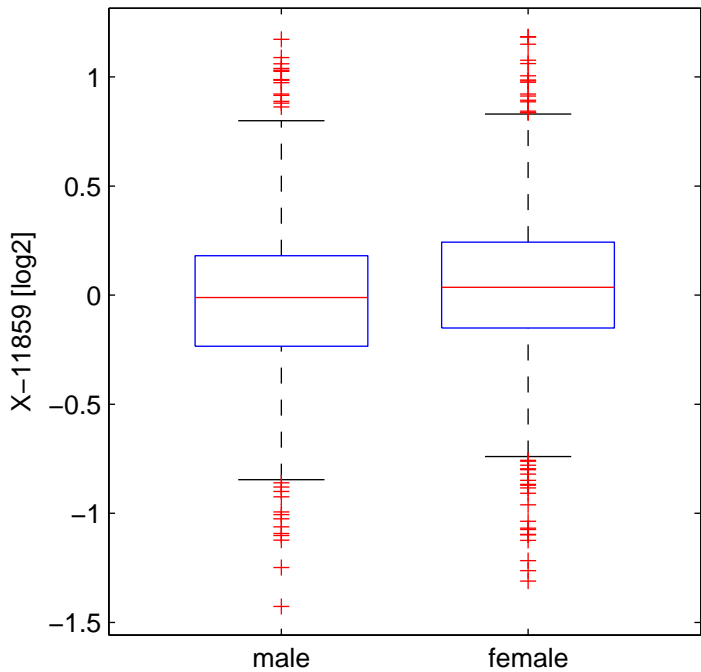

p-val: 3.44e-001

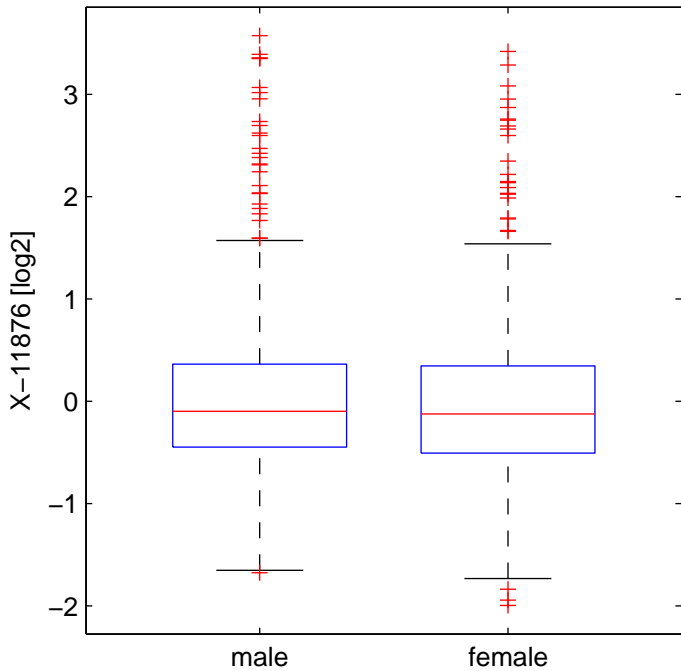



p-val: 3.04e-004

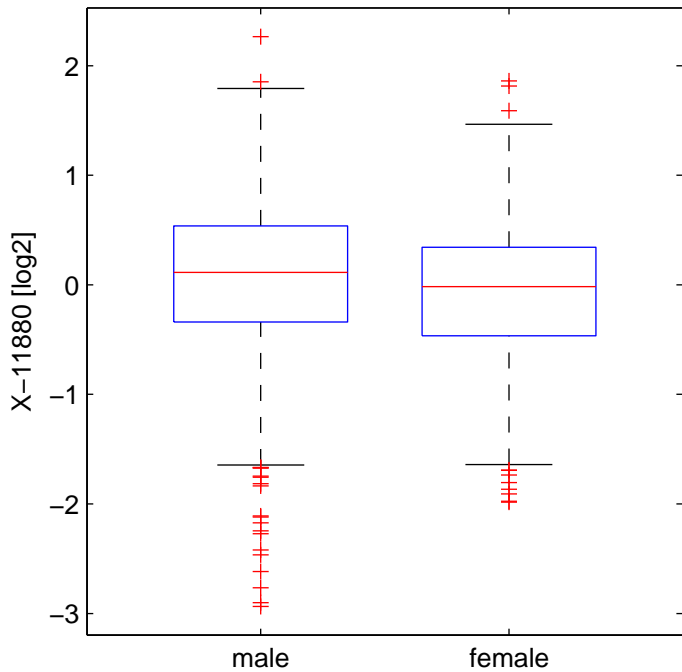

p-val: 2.59e-001

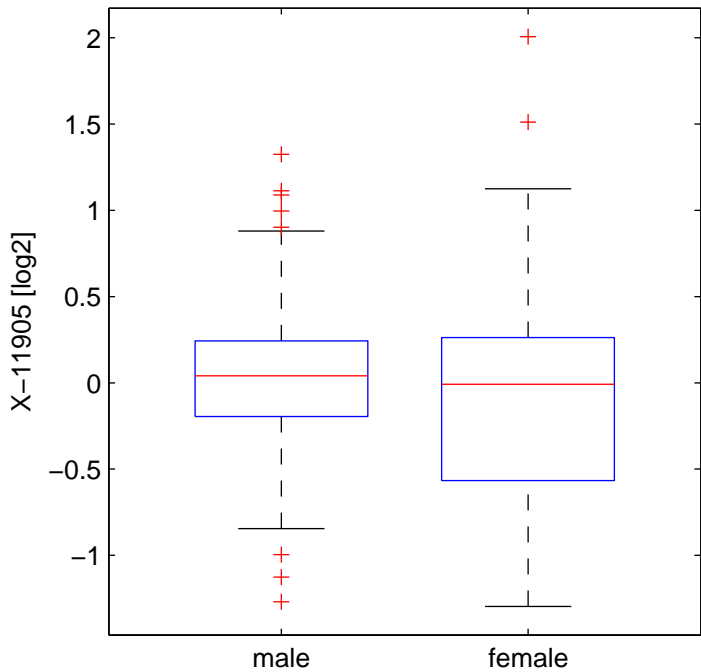

p-val: 8.96e-001

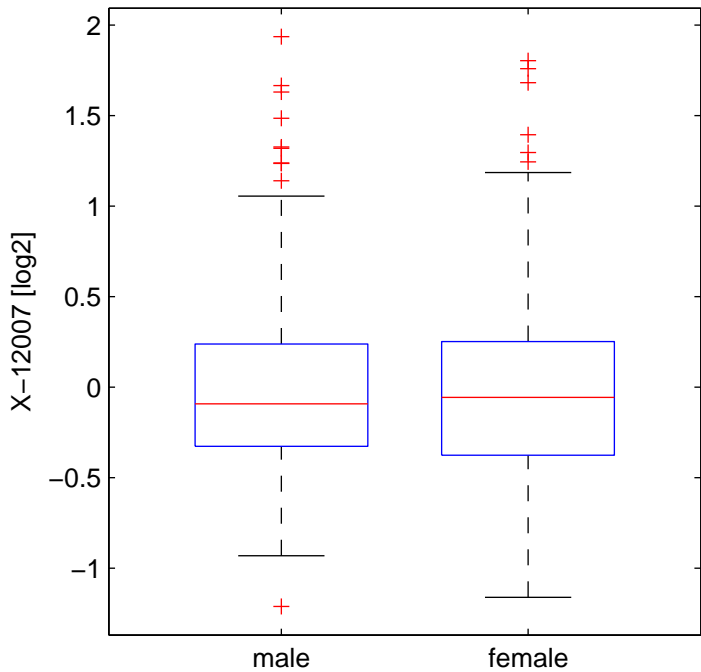

p-val: 1.50e-001

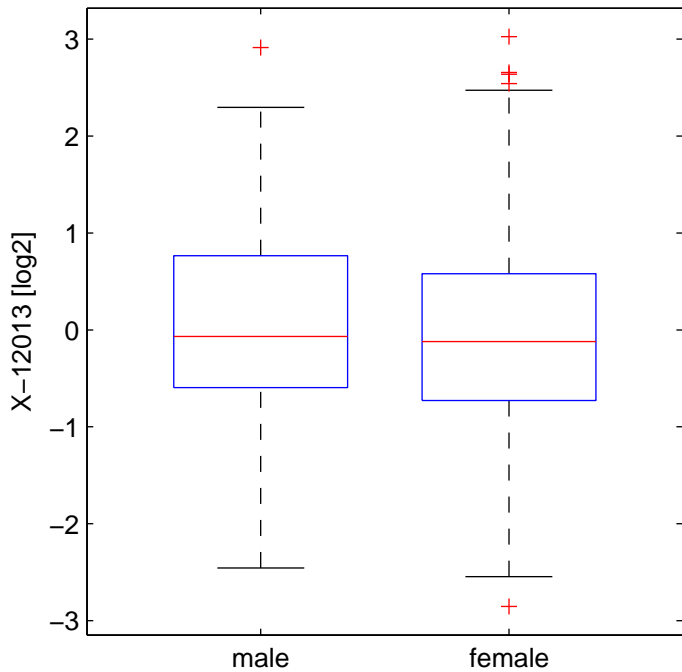

p-val: 3.55e-001

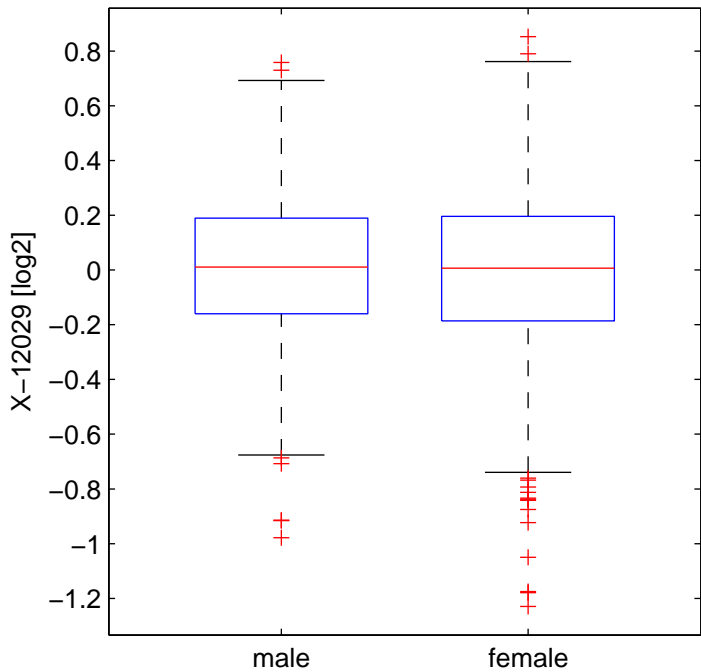

p-val: 8.23e-003

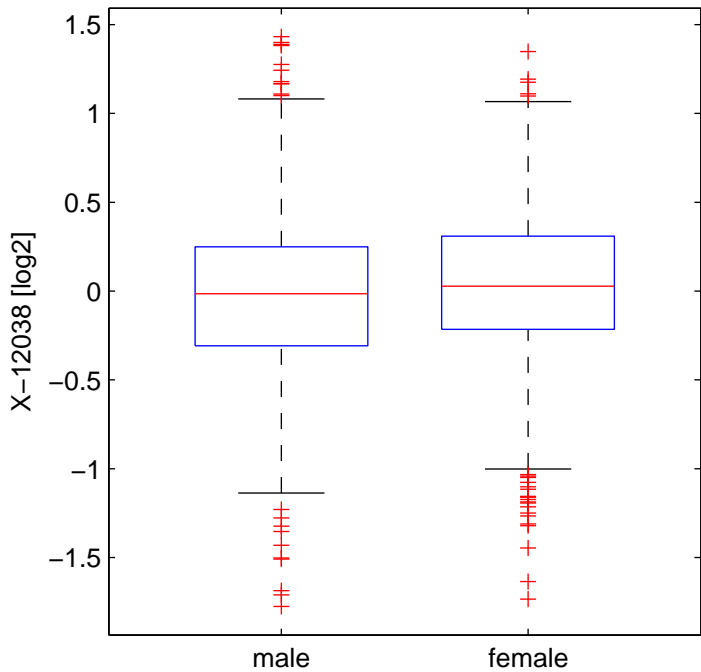

p-val: 2.37e-002

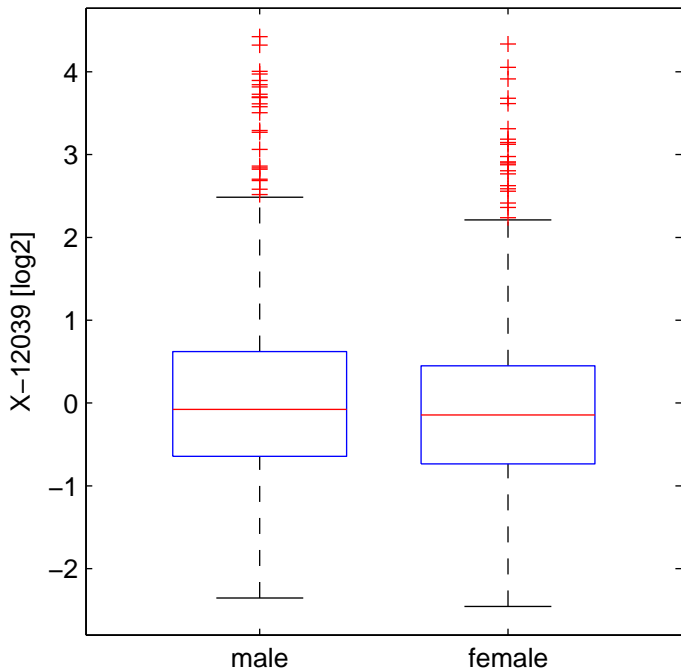

p-val: 9.26e-002

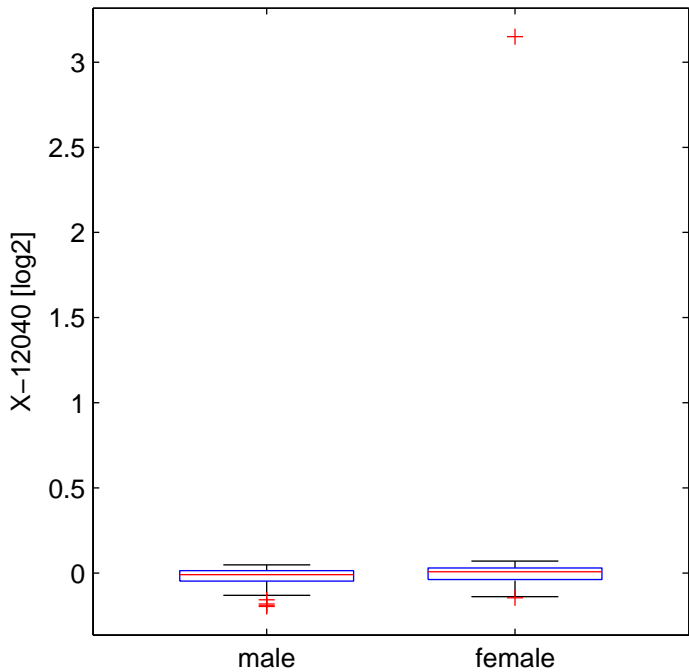



p-val:  $8.10 \times 10^{-5}$

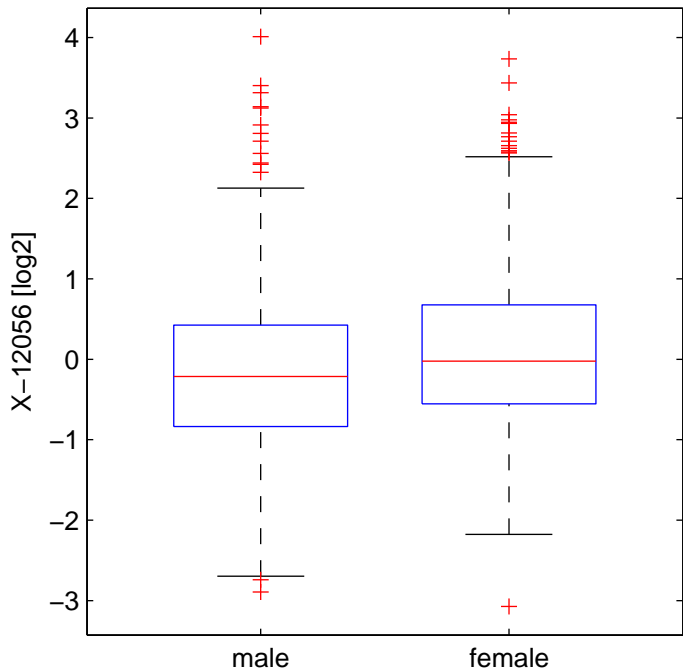

p-val: 3.80e-011

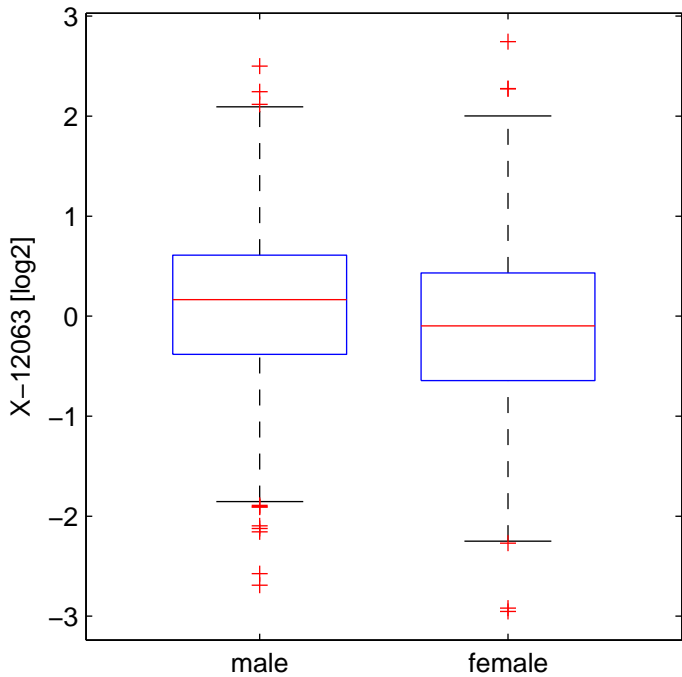

p-val: 7.83e-002

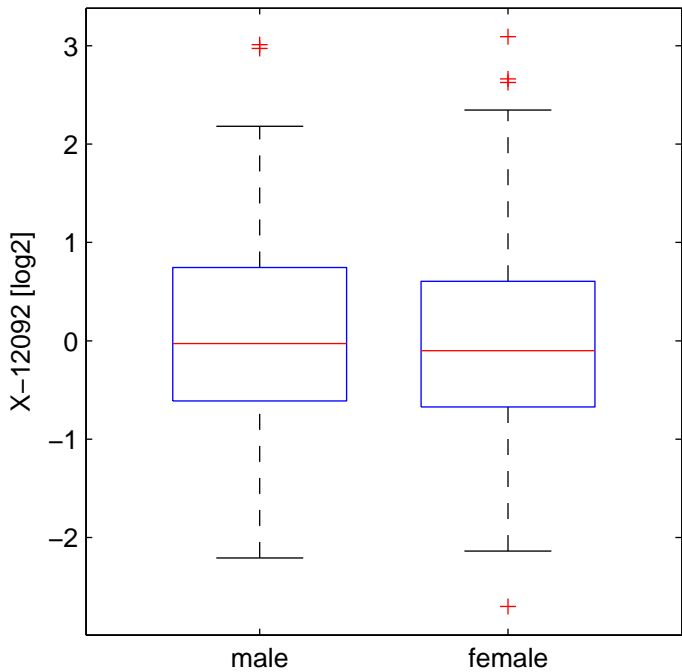

p-val: 1.29e-001

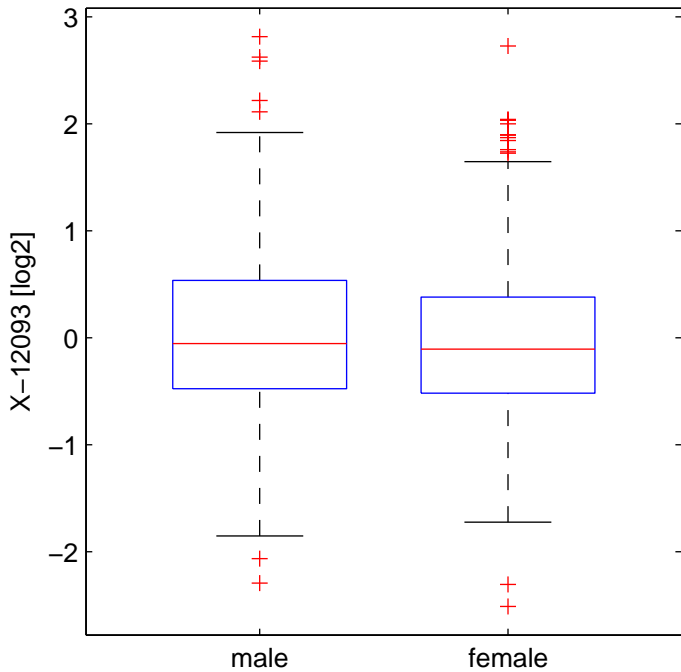

p-val: 2.79e-001

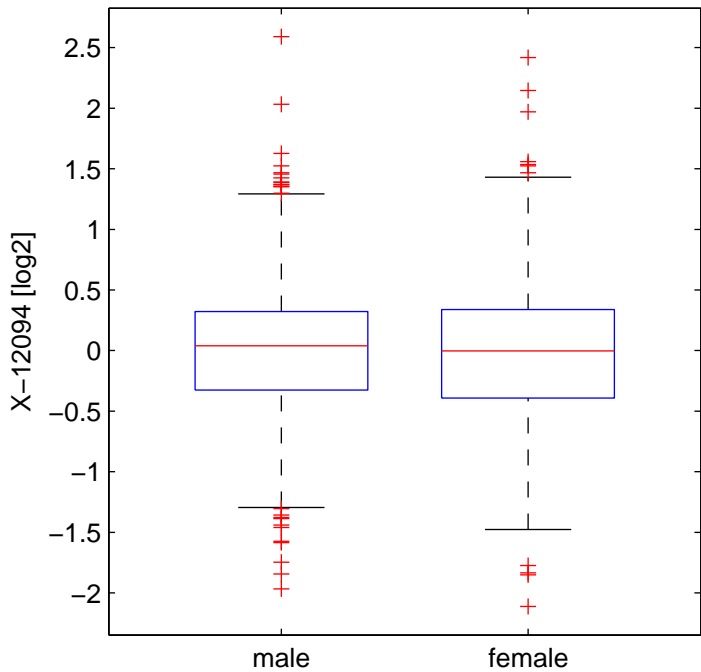

p-val: 8.40e-002

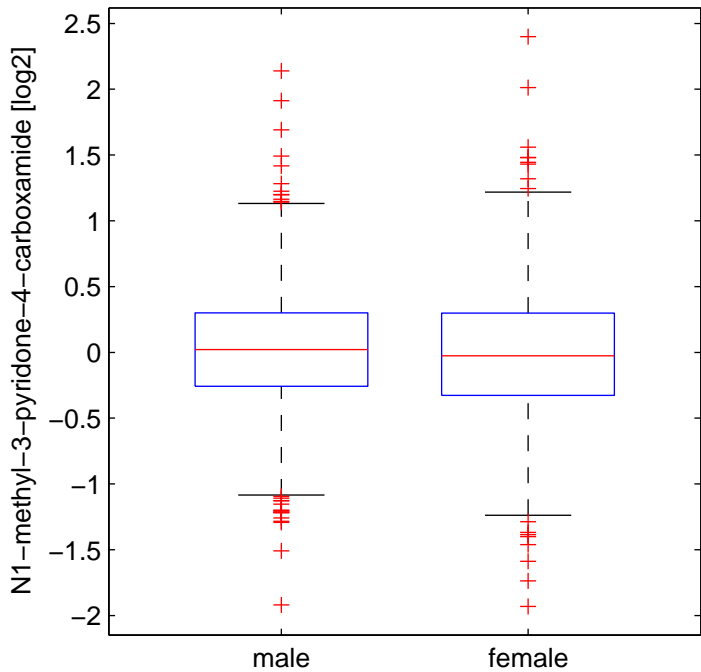

p-val: 3.69e-002

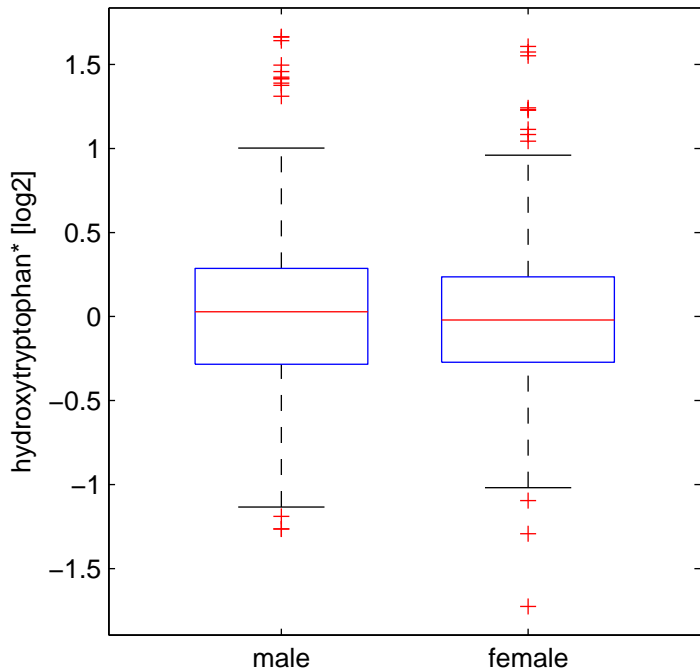

p-val: 3.55e-002

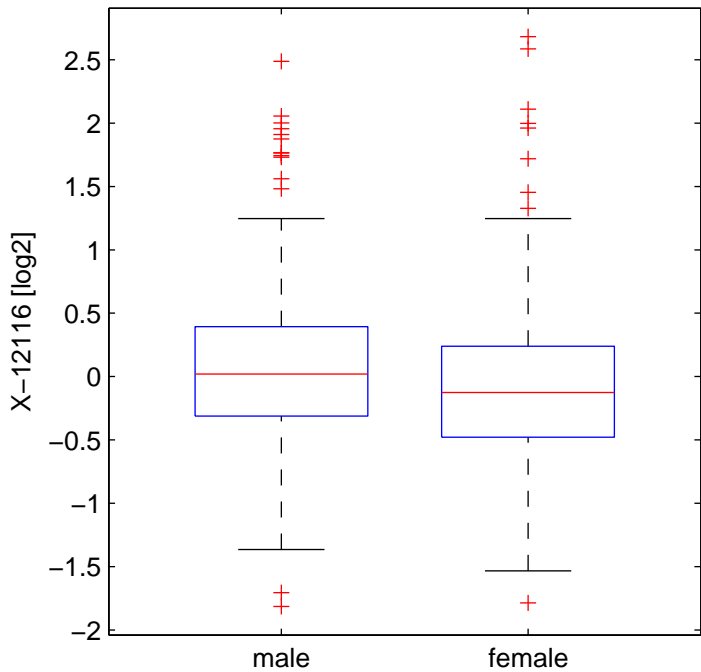



p-val: 8.14e-002

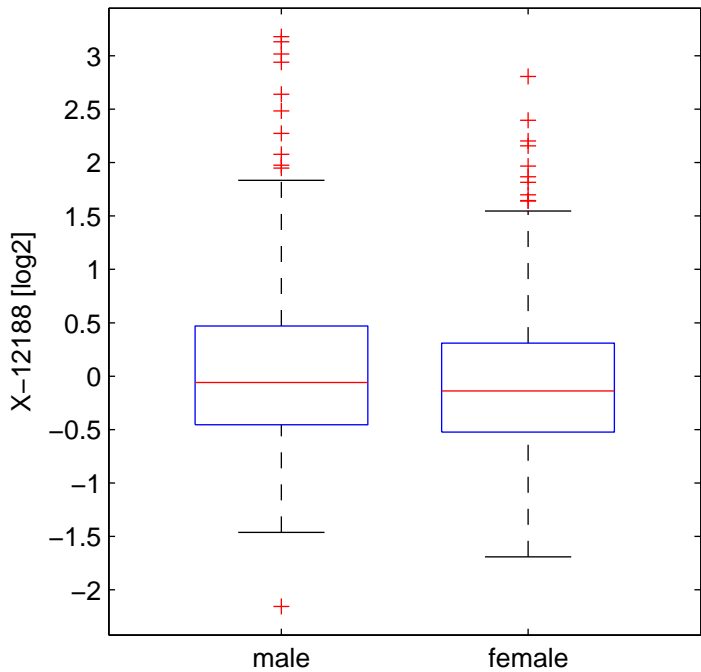

p-val: NaN

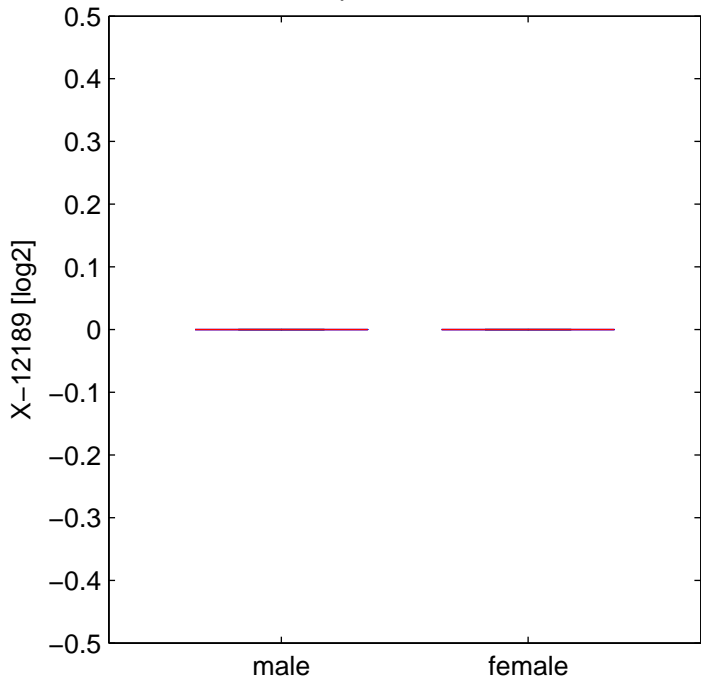

p-val: 6.26e-002

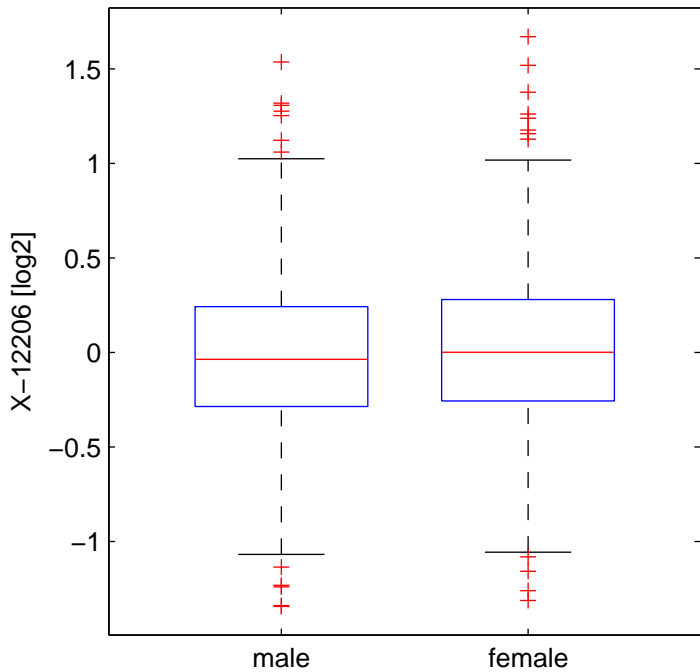

p-val: 4.35e-003

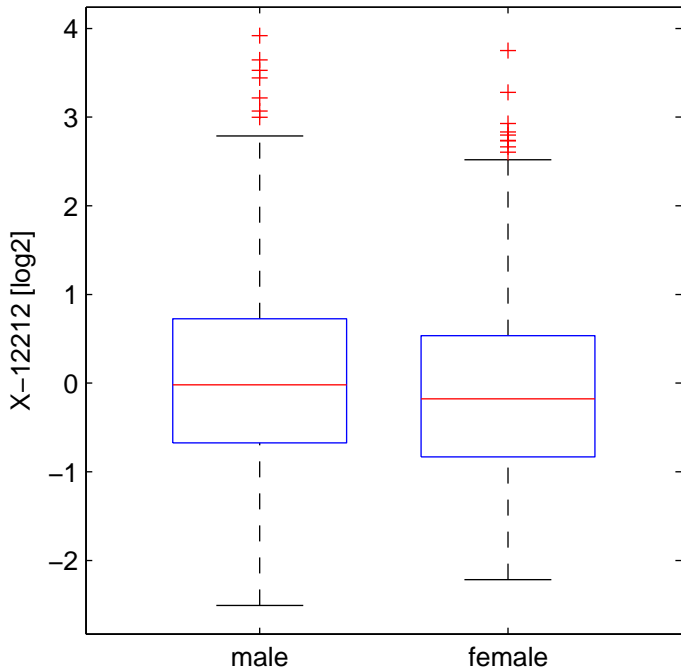

p-val: 9.16e-001

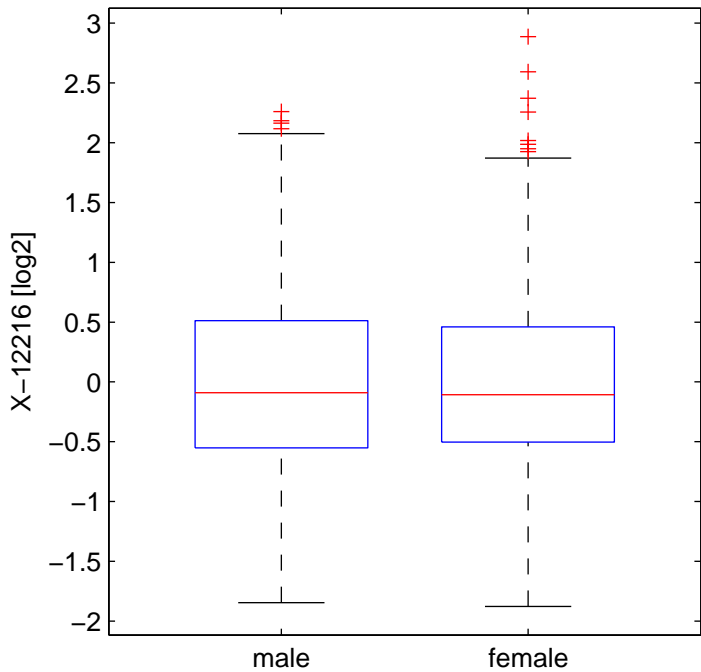

p-val: 1.39e-007

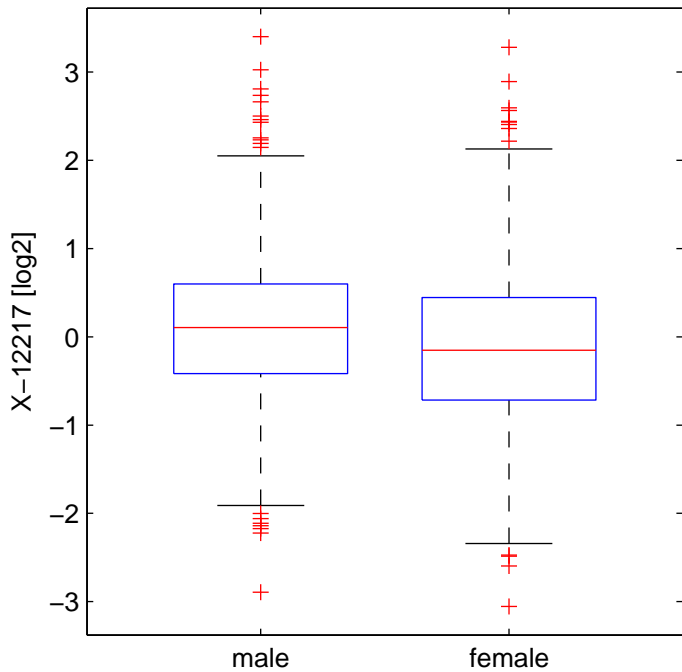

p-val: 9.92e-001

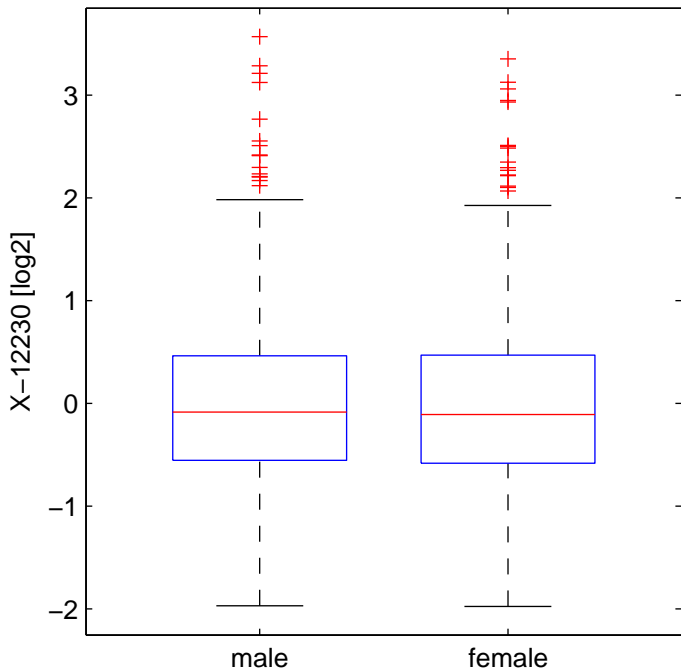

p-val: 4.48e-022

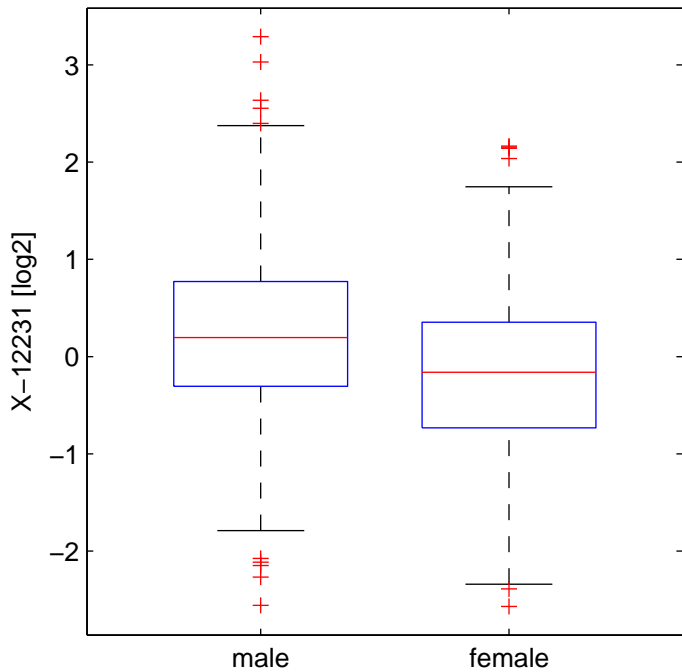



p-val: 5.67e-001

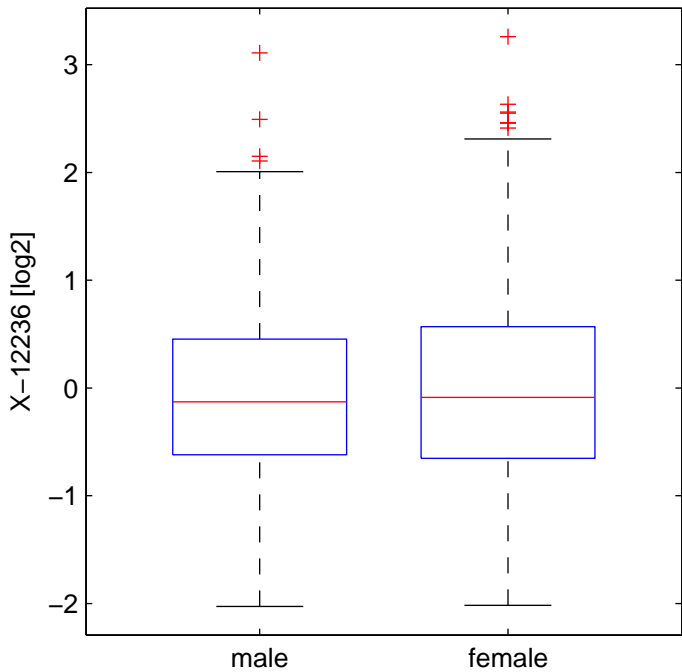

p-val: 3.44e-141

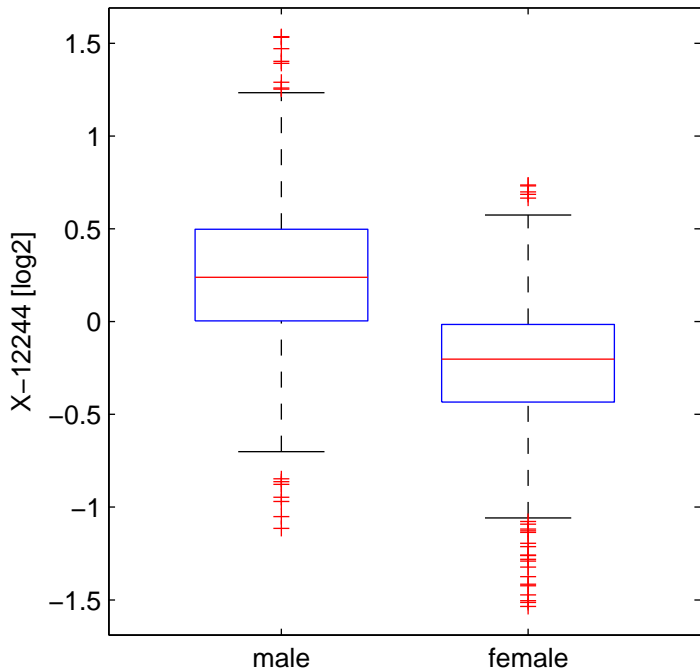

p-val:  $5.10 \times 10^{-21}$

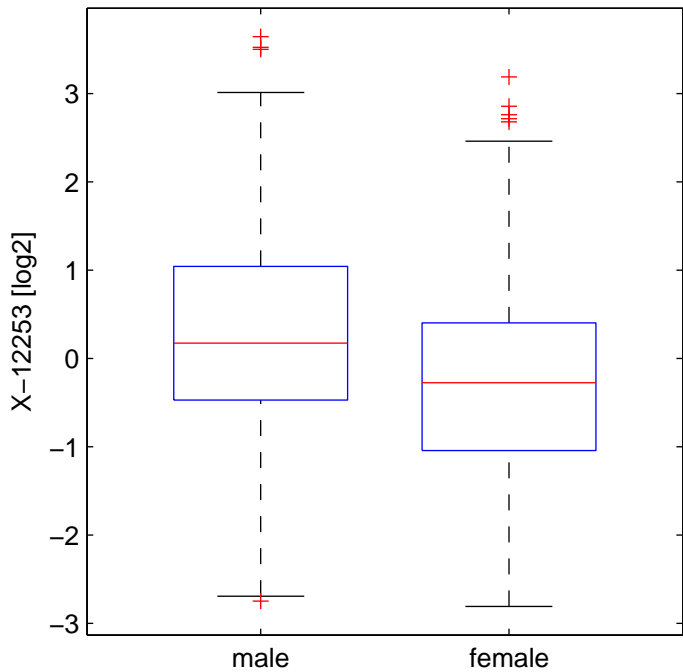

p-val: 1.88e-002

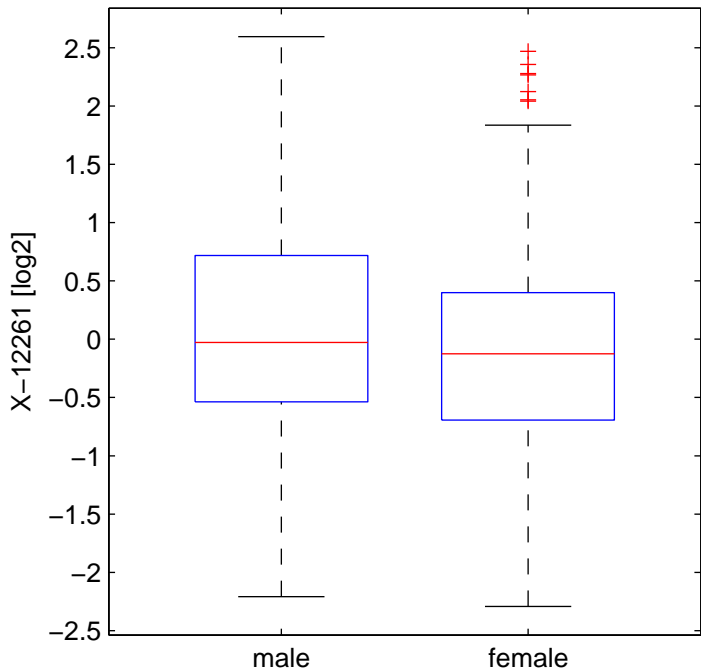

p-val: 2.24e-001

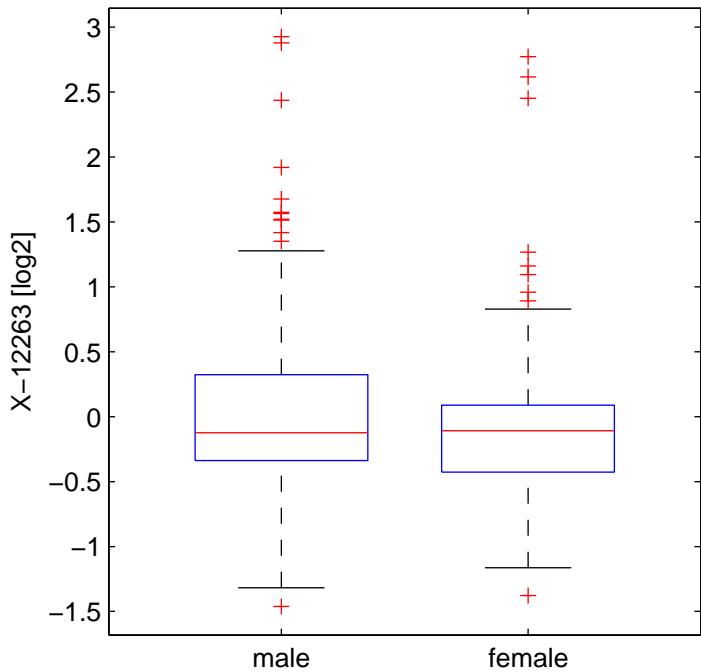

p-val: 5.70e-001

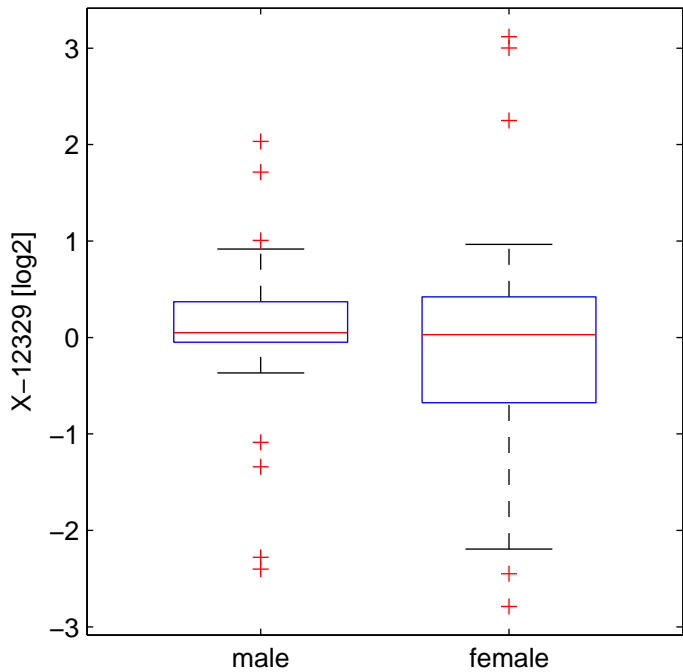

p-val: 1.44e-007

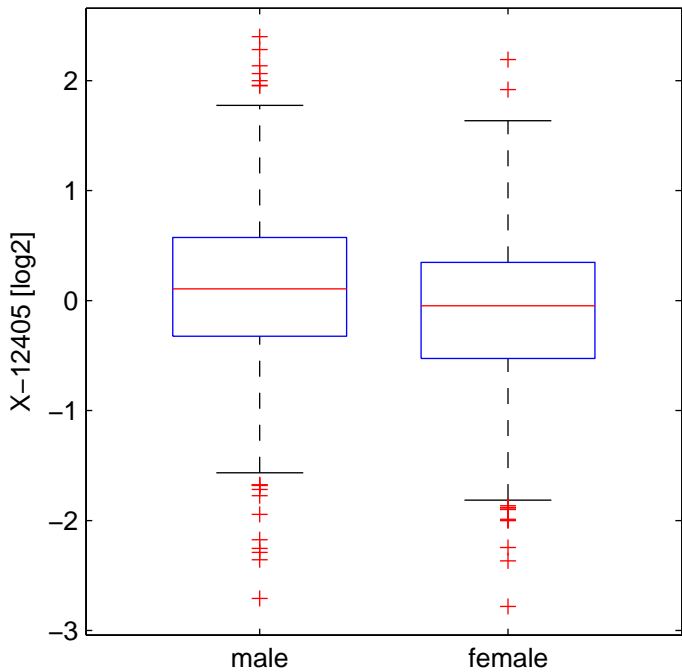

p-val: 1.46e-001

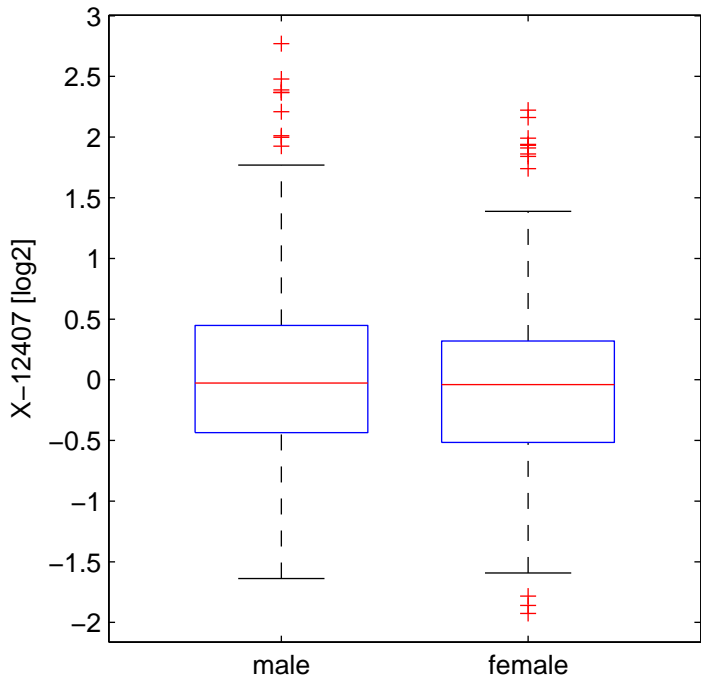



p-val: 5.72e-001

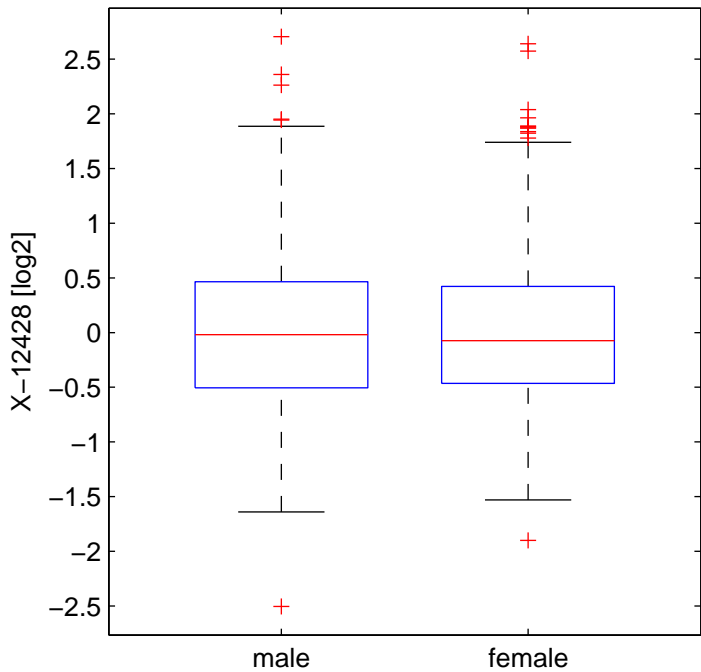

p-val: 1.54e-002

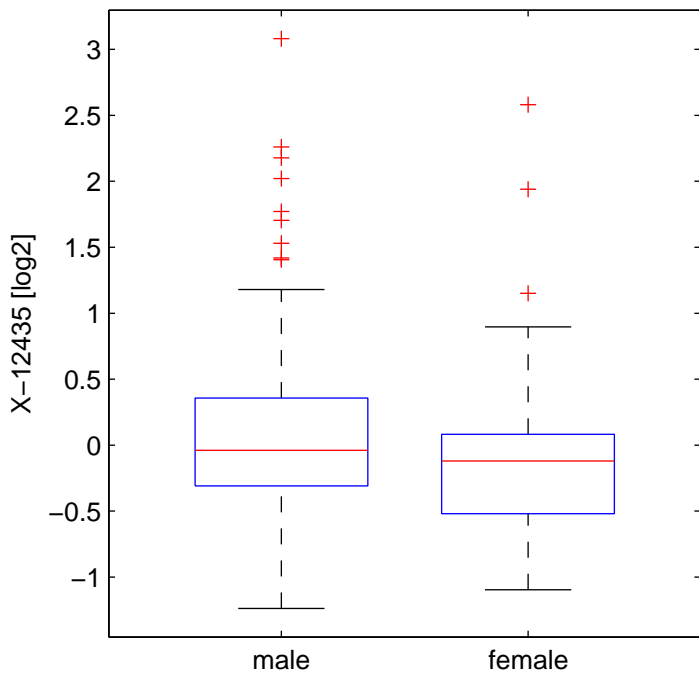

p-val: 9.70e-001

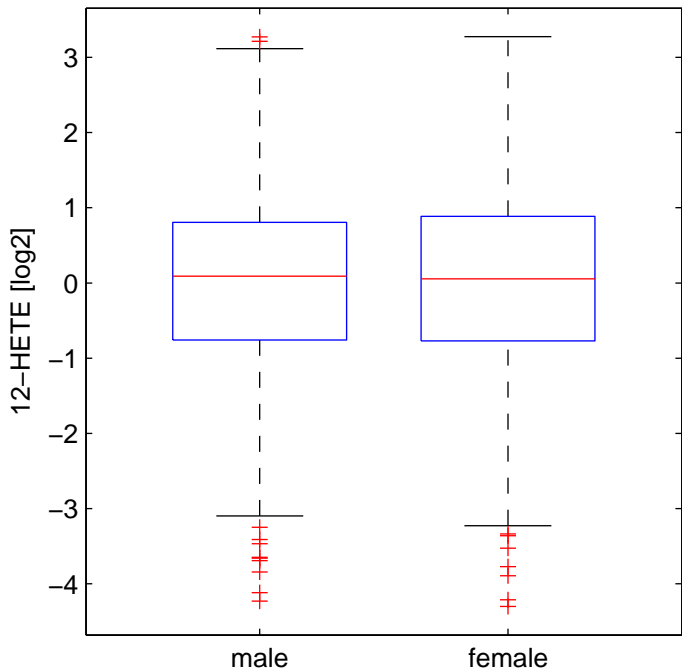

p-val: 1.77e-007

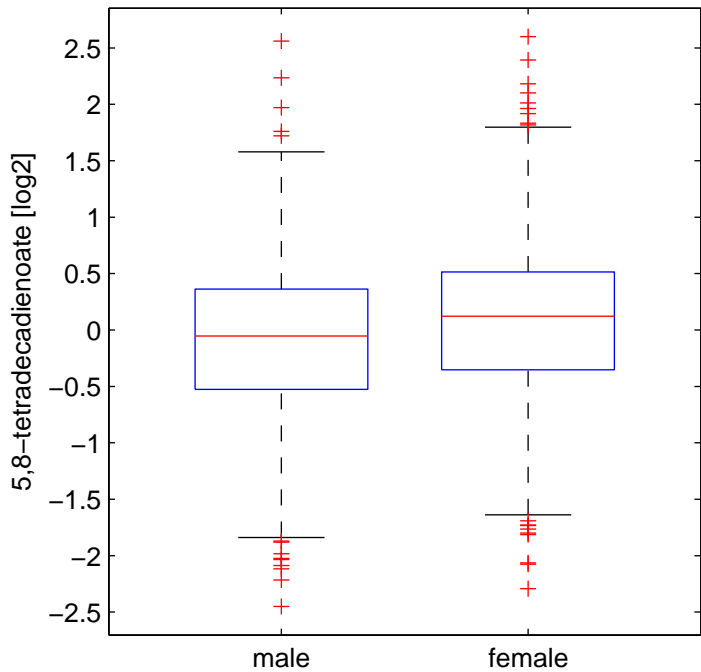

p-val: 8.66e-001

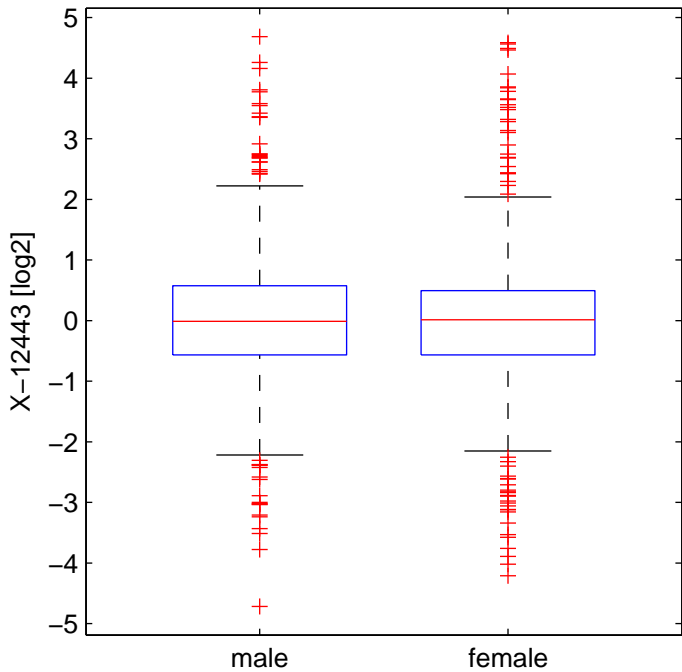

p-val: 4.69e-010

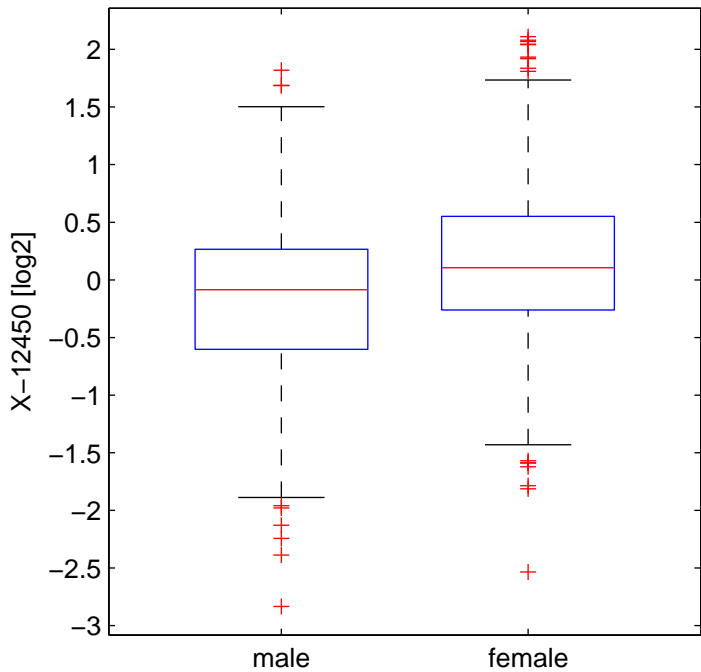

p-val: 3.15e-001

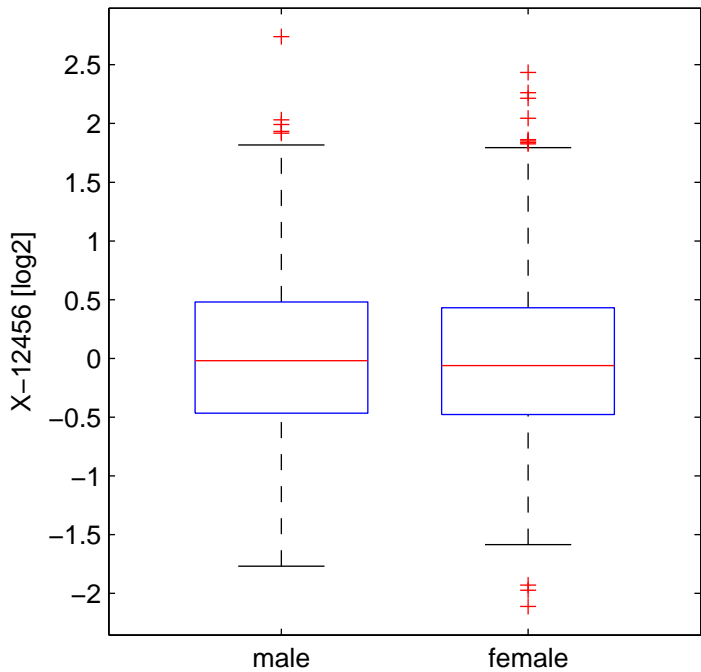

p-val: 3.13e-005

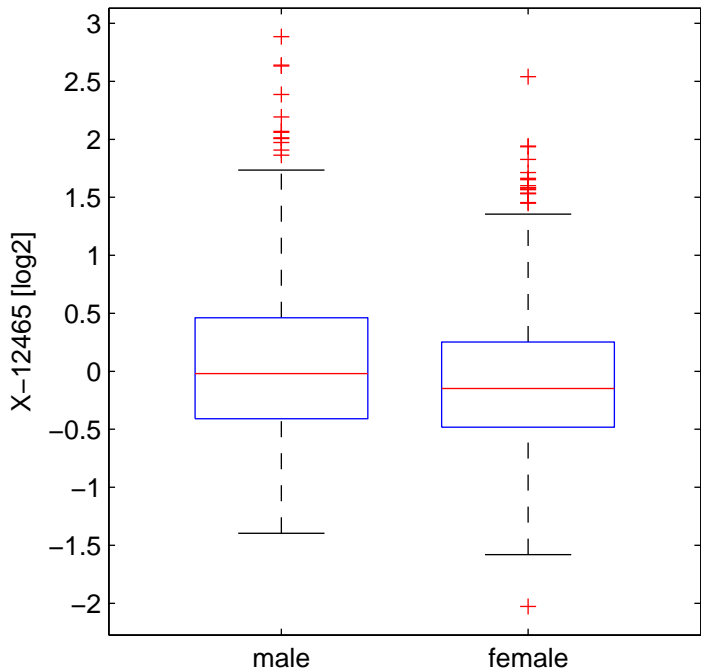



p-val: 2.62e-010

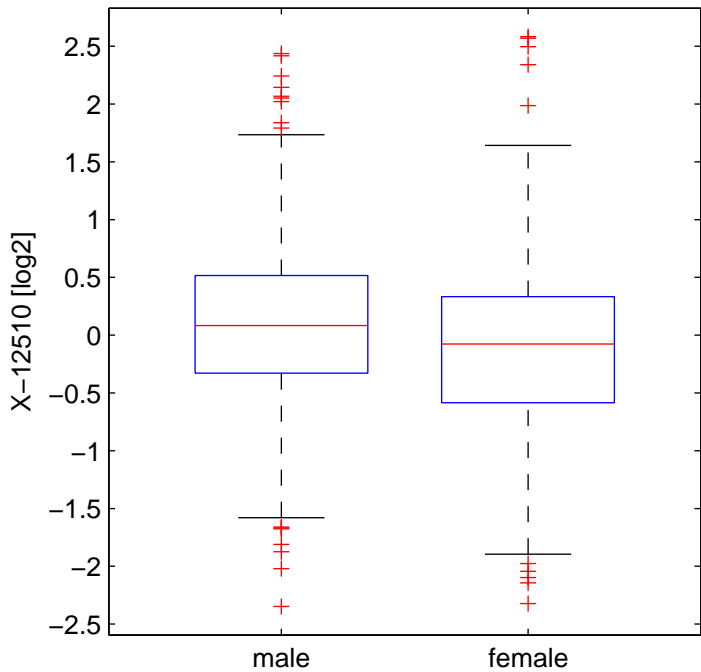

p-val: 6.34e-004

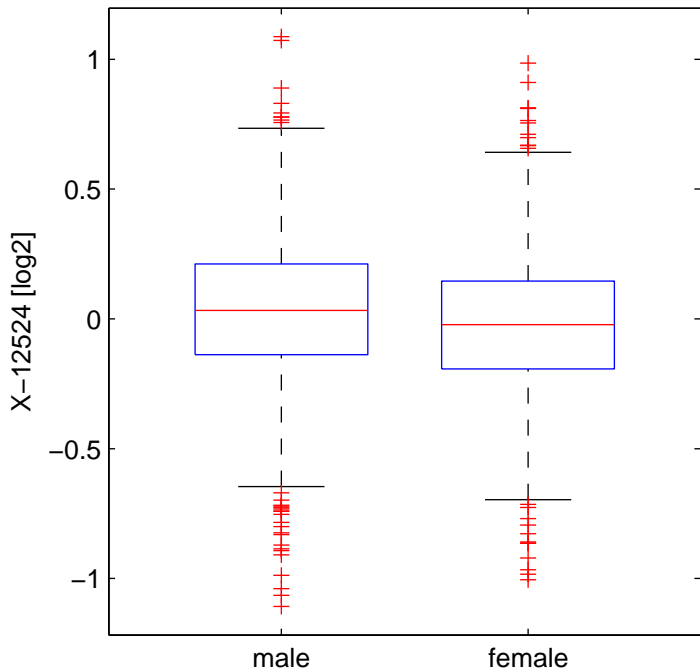

p-val: 1.59e-005

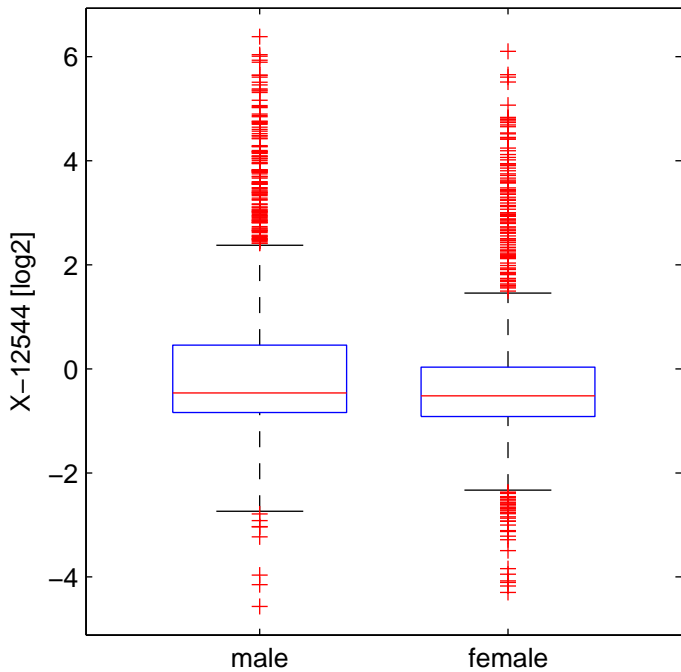

p-val: 3.83e-003

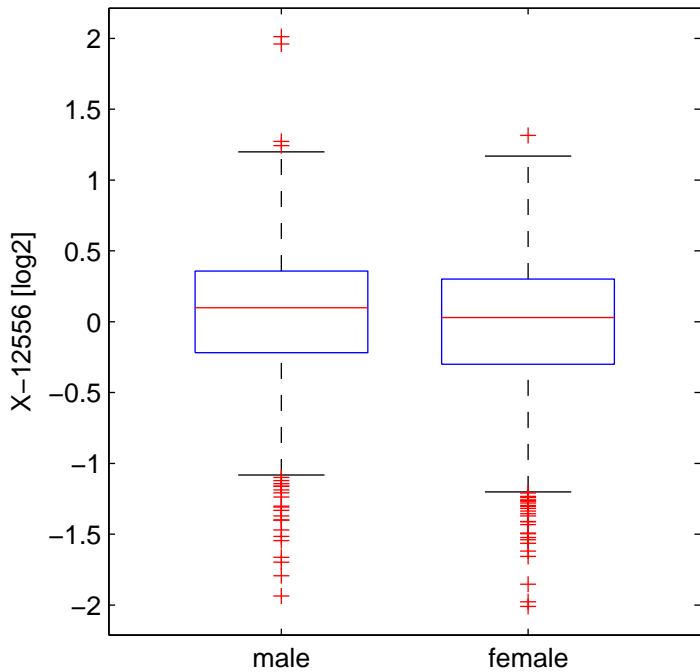

p-val: 8.47e-001

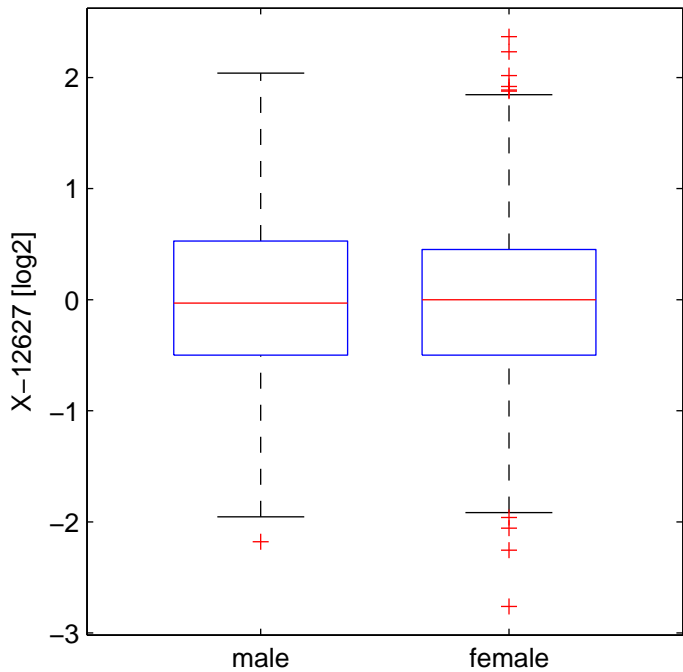

p-val: 7.46e-001

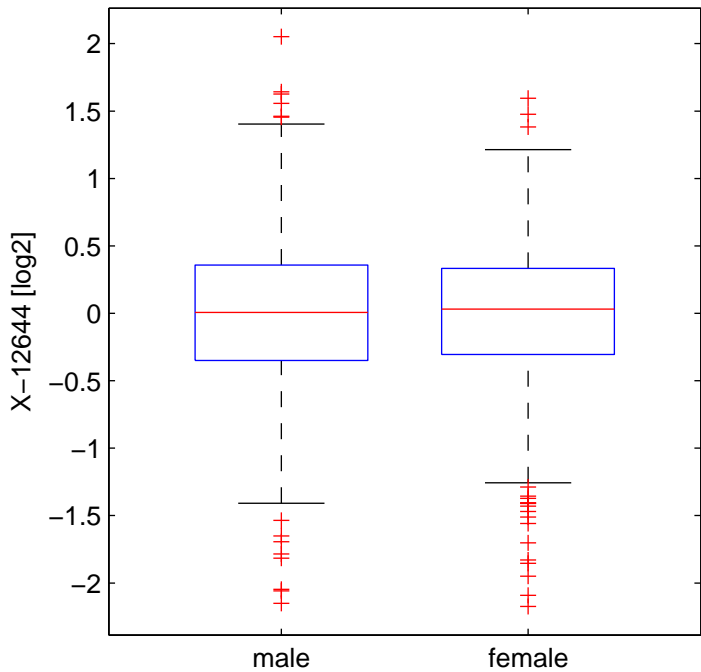

p-val: 3.53e-001

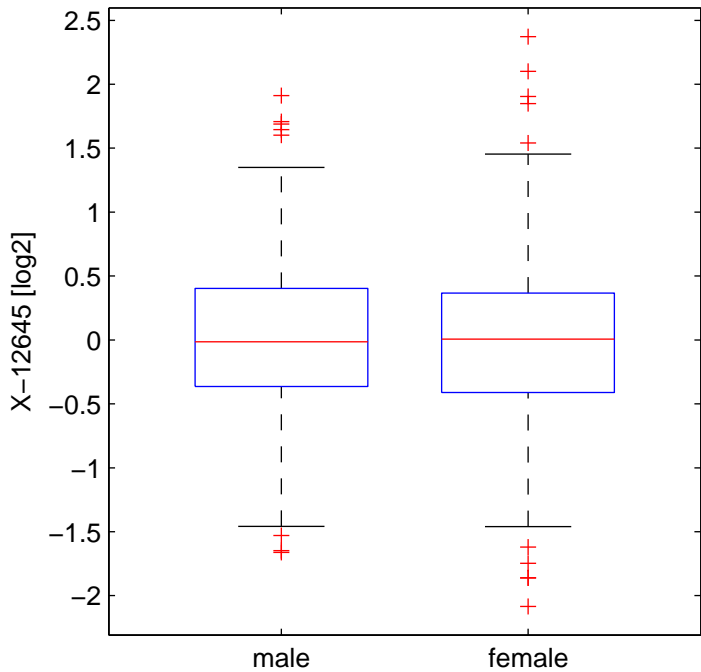

p-val: 1.68e-035

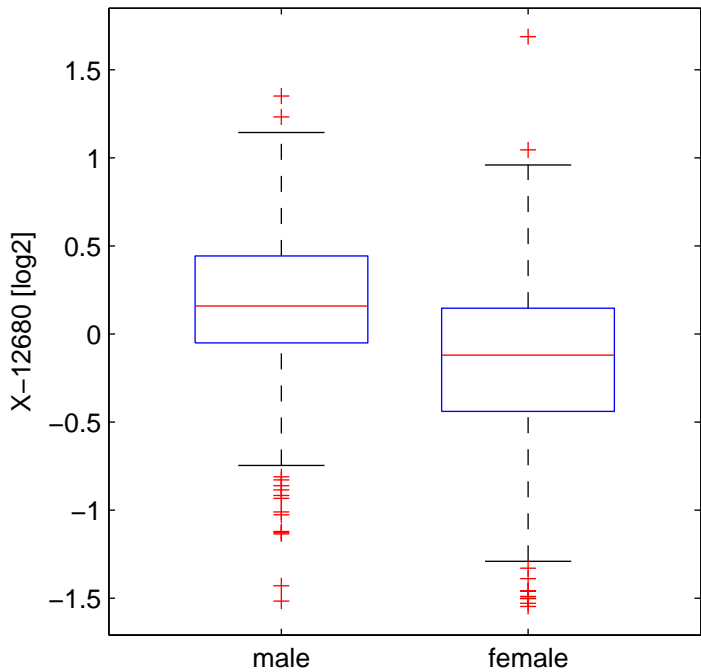



p-val: 1.60e-013

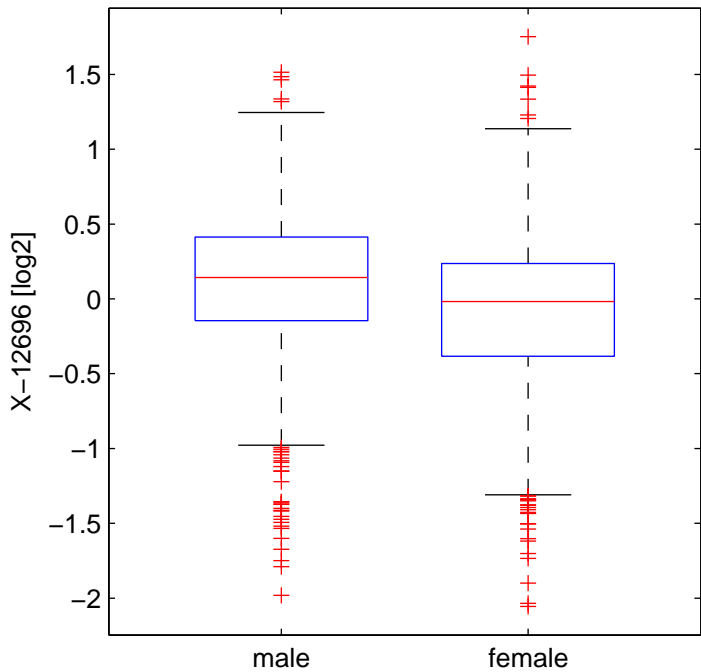

p-val: 5.58e-001

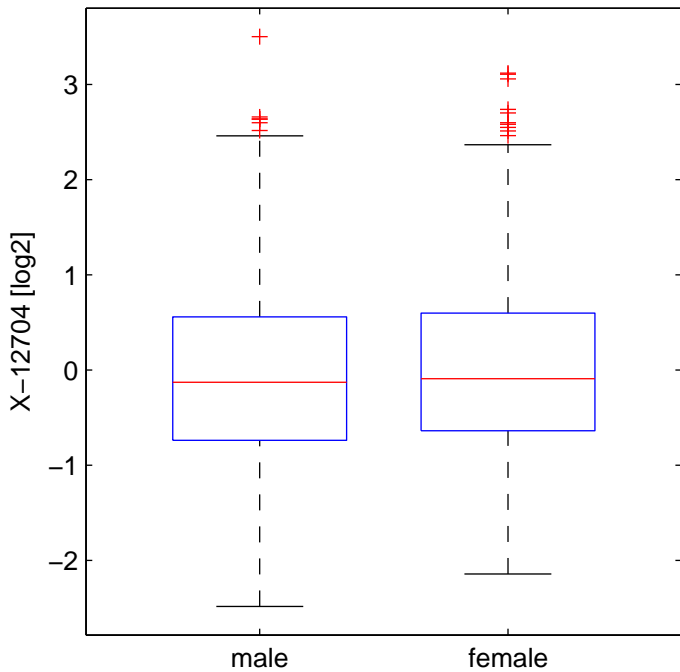

p-val: 1.61e-006

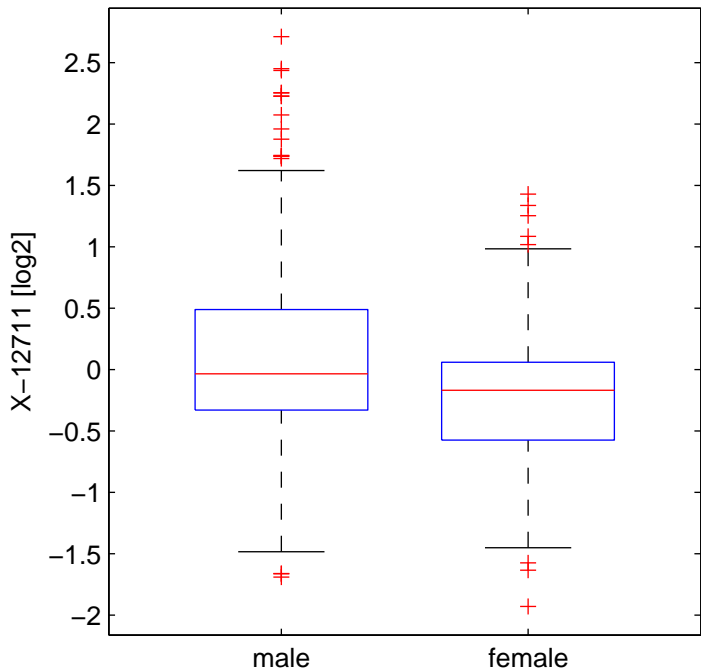

p-val: NaN

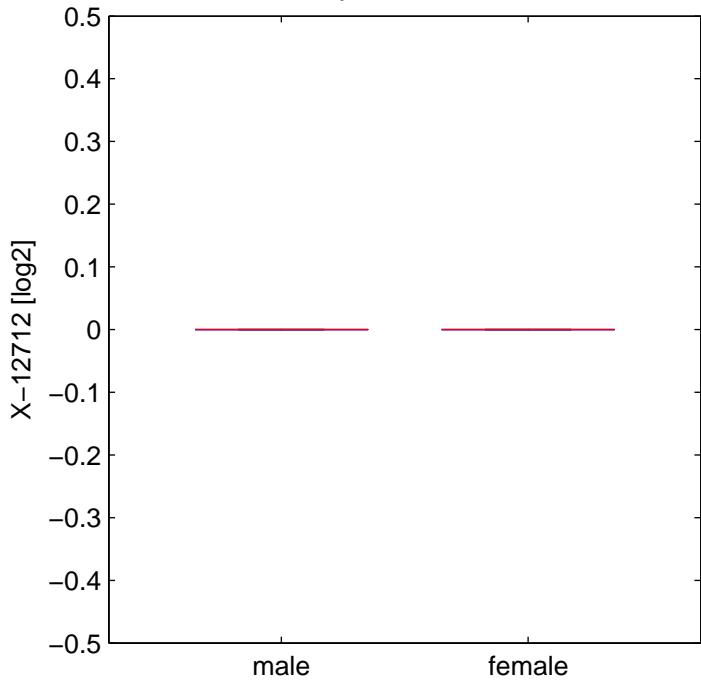

p-val: 4.27e-001

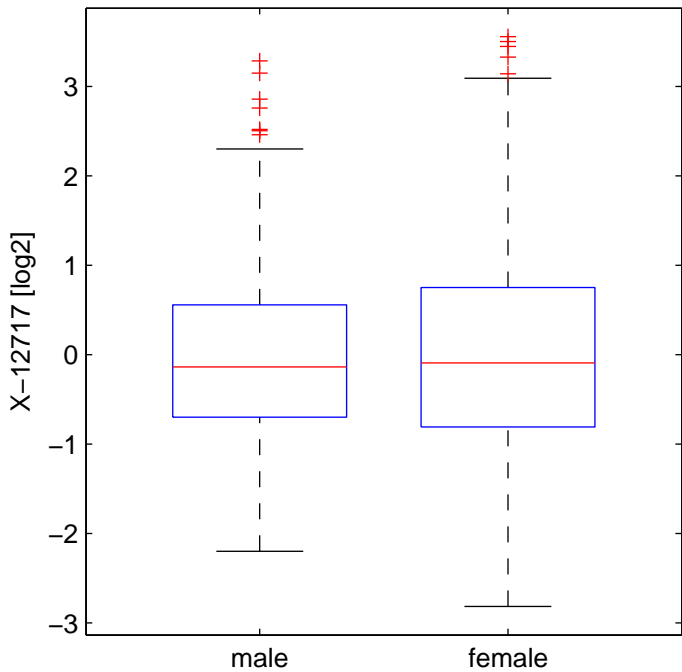

p-val: 1.58e-003

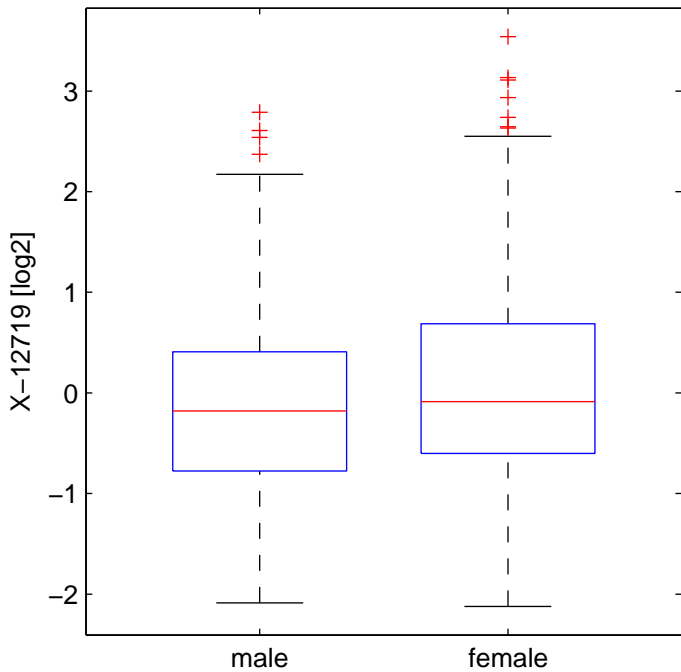

p-val: 9.72e-001

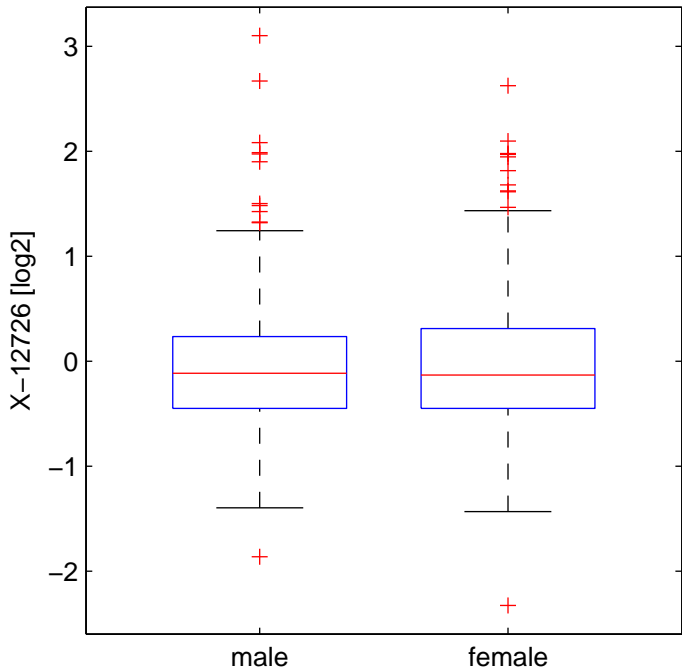

p-val: 7.96e-003

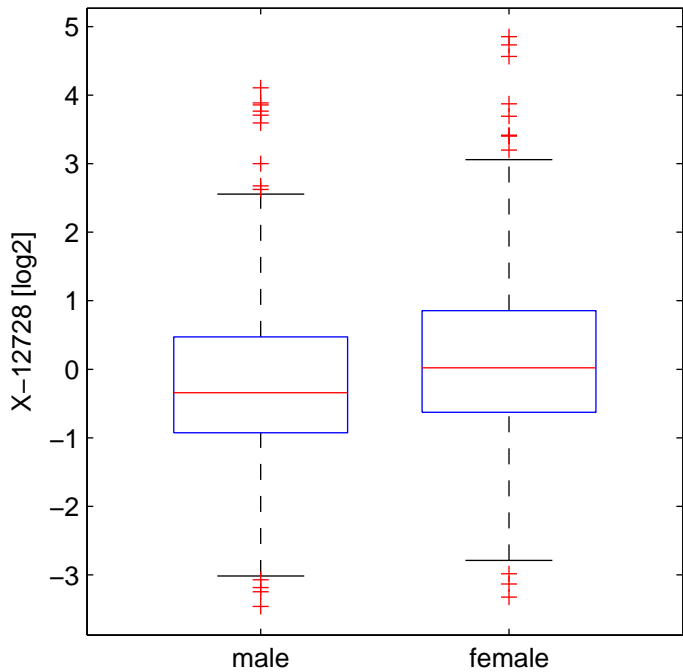



p-val: 3.06e-001

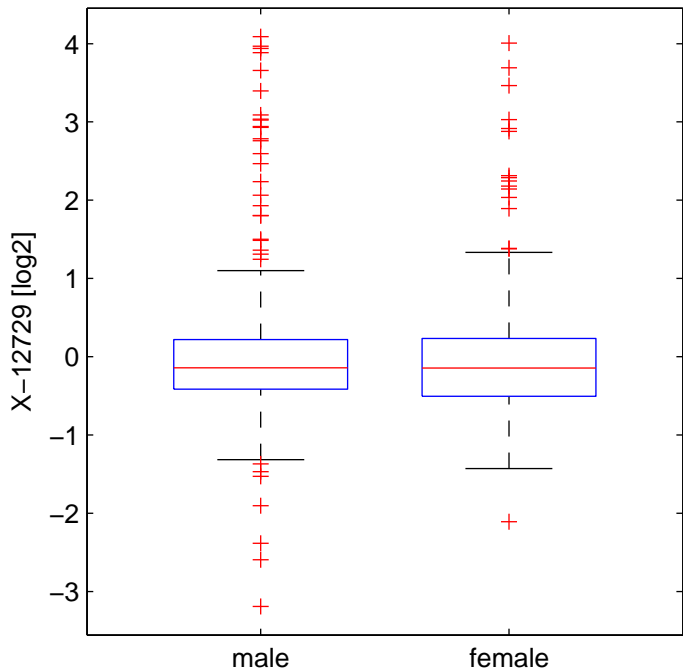

p-val: 1.36e-001

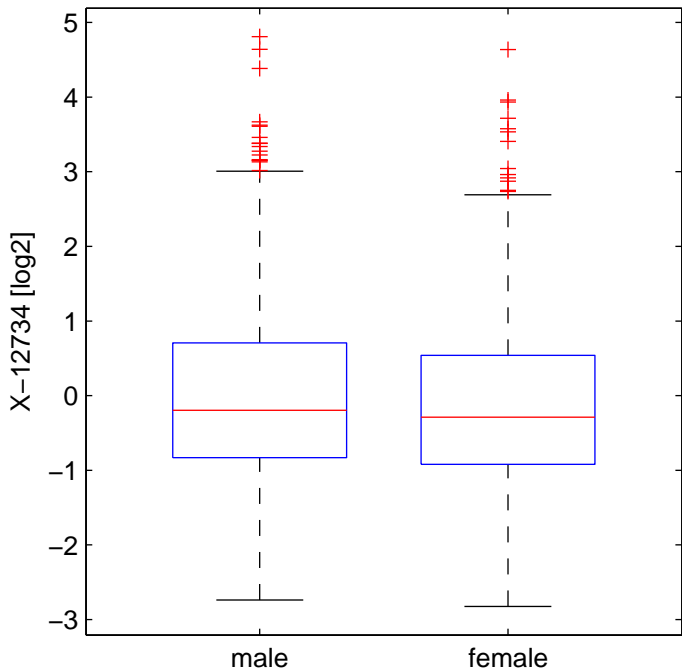

p-val: 4.80e-002

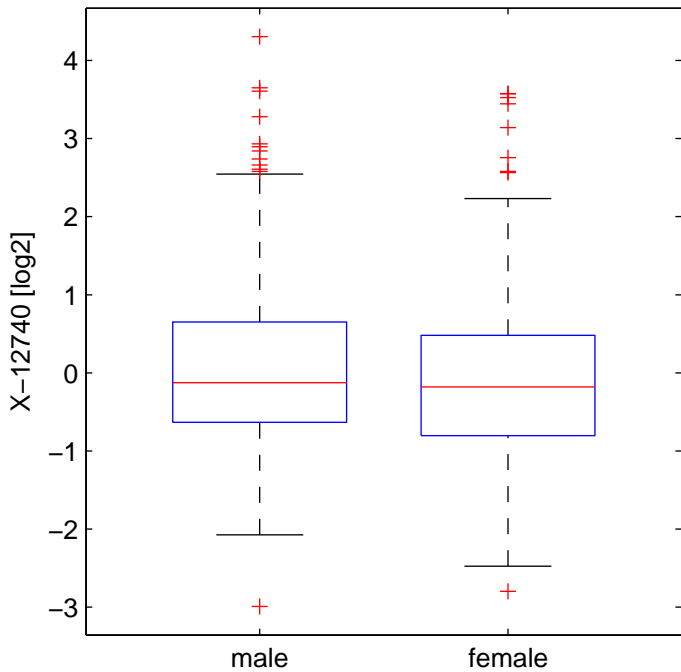

p-val: 1.15e-003

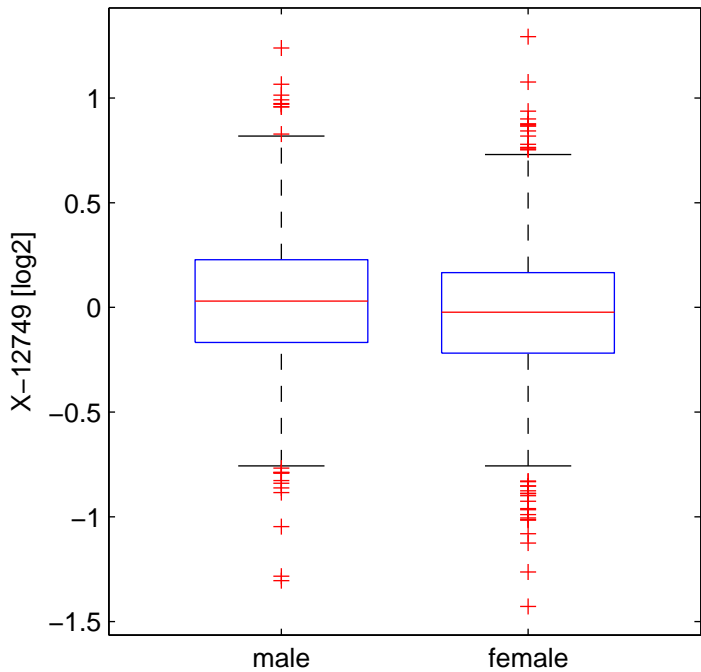

p-val: 1.17e-005

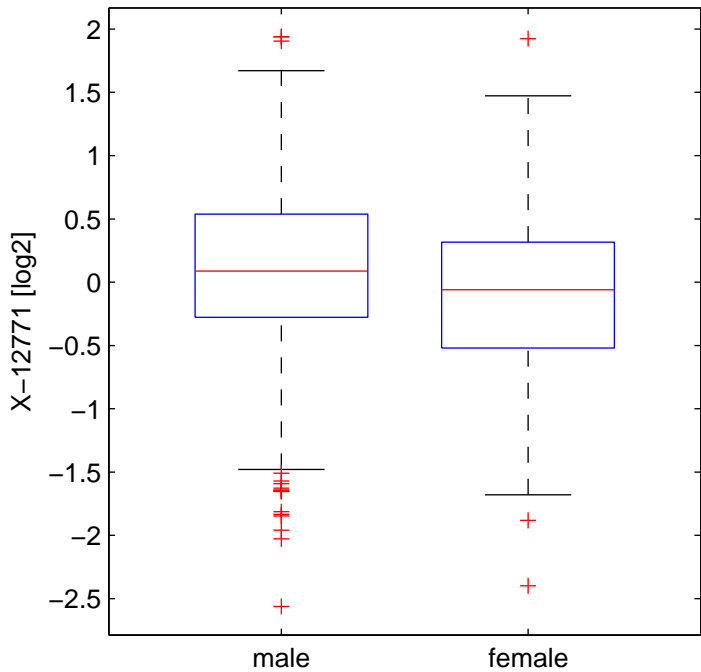

p-val: 4.61e-001

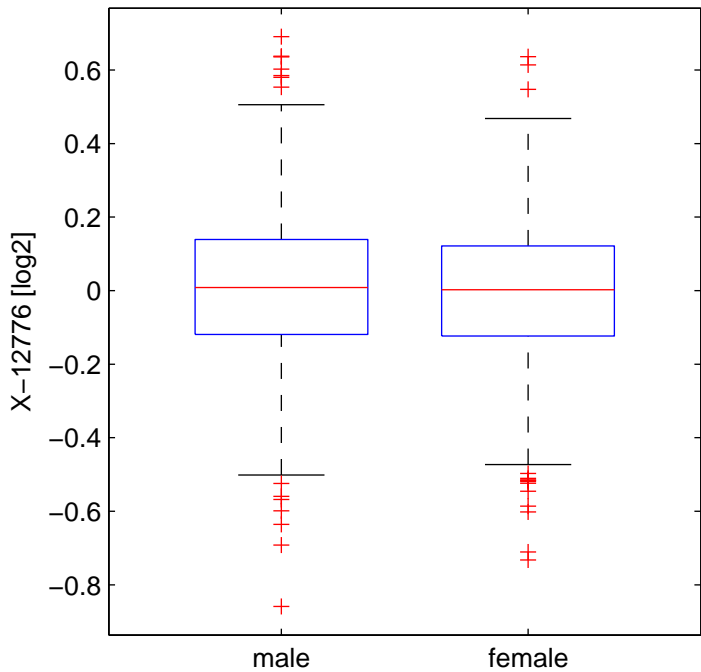

p-val: 1.26e-002

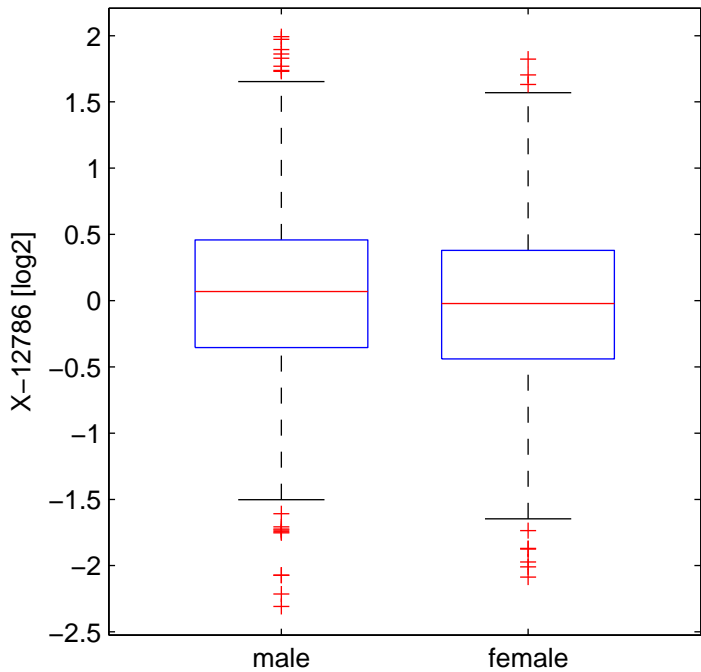

p-val: 4.03e-001

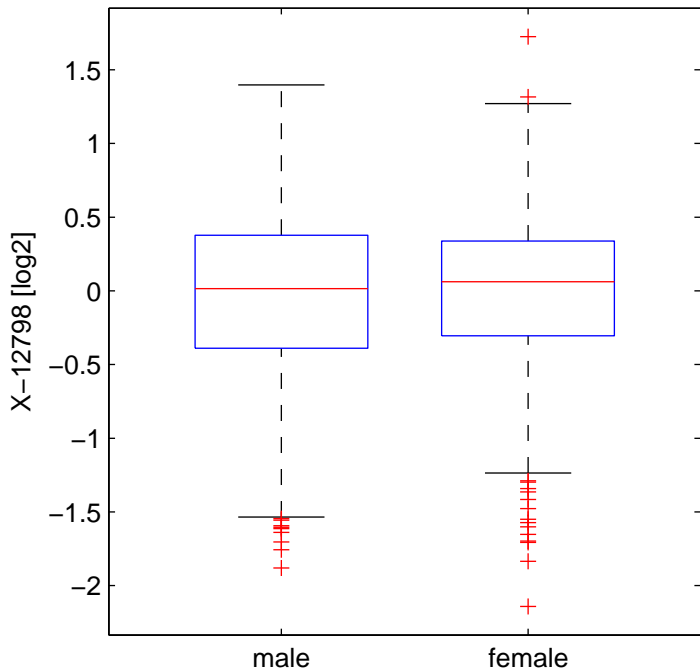



p-val: 2.06e-002

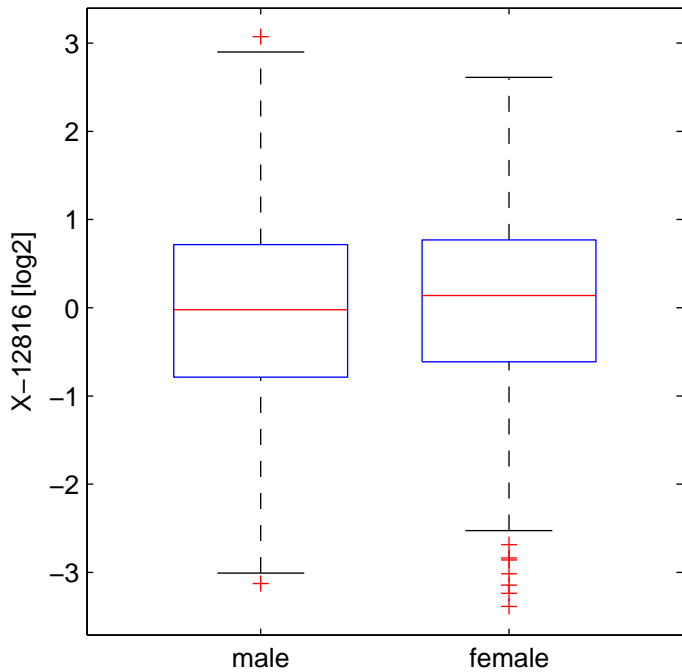

p-val: 1.09e-003

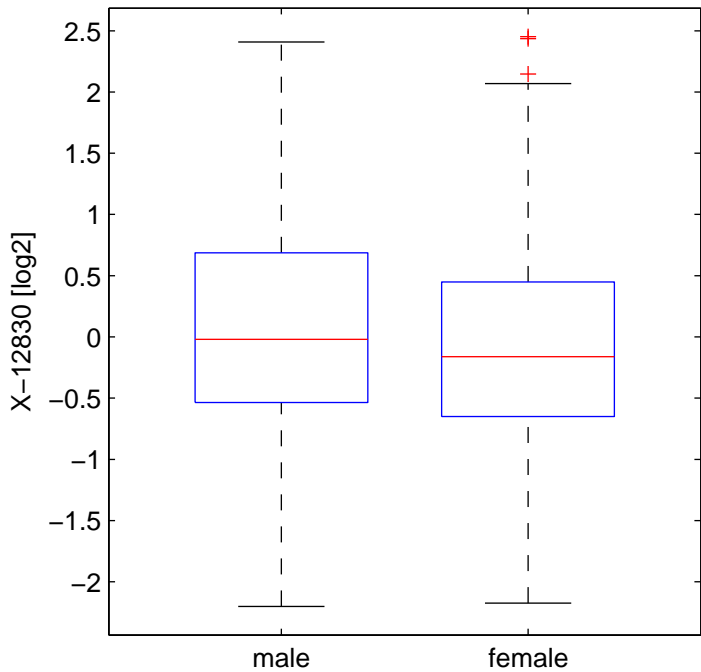

p-val: 8.81e-001

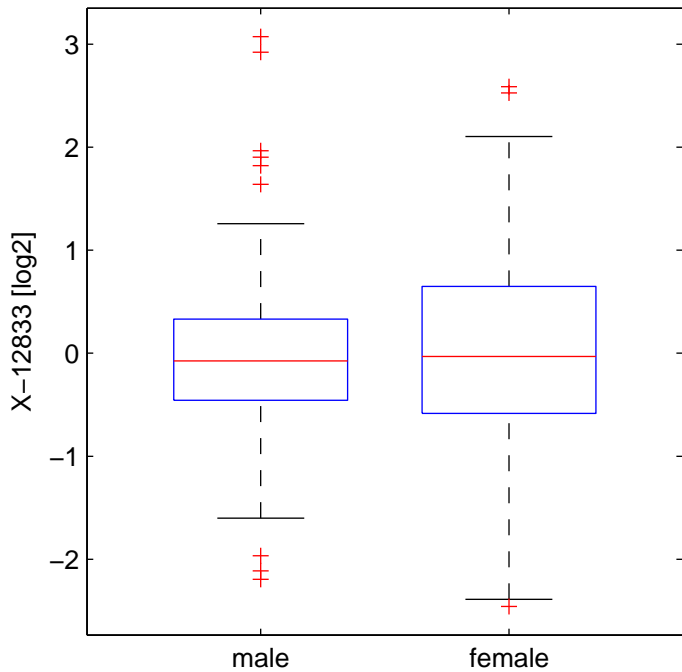

p-val: 2.28e-003

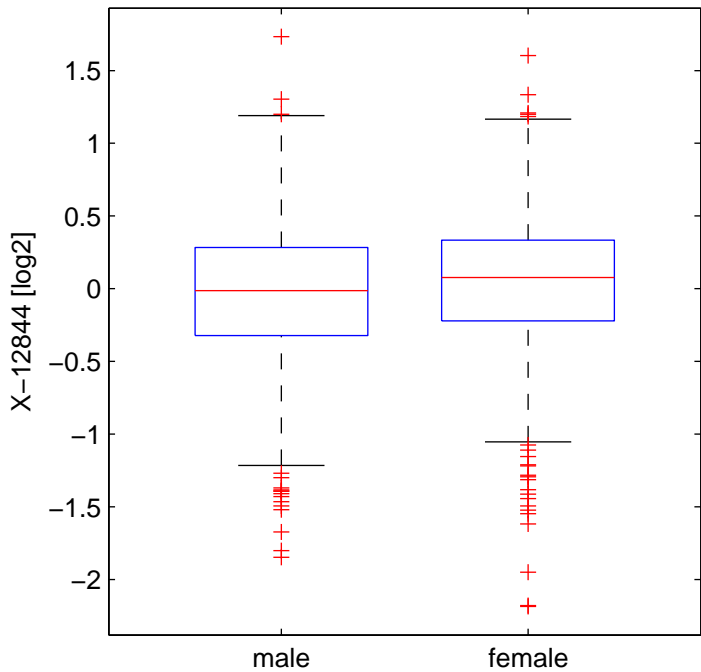

p-val: 5.40e-005

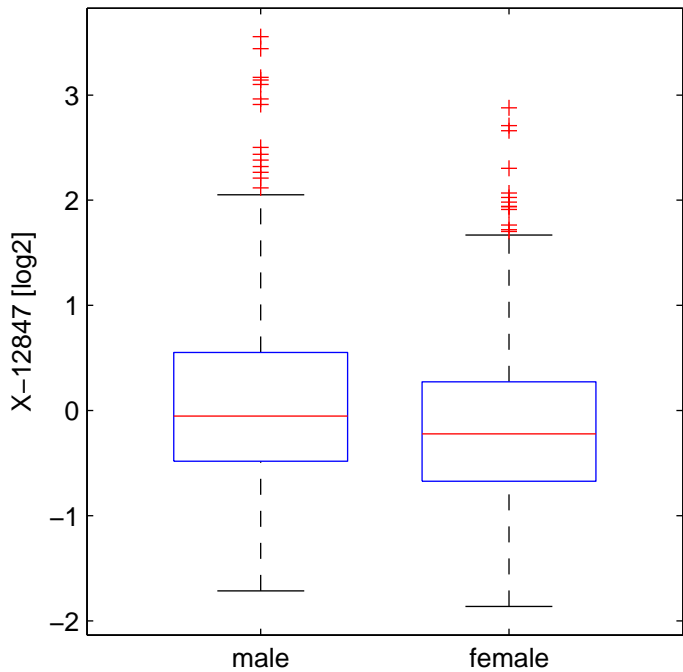

p-val: 1.28e-012

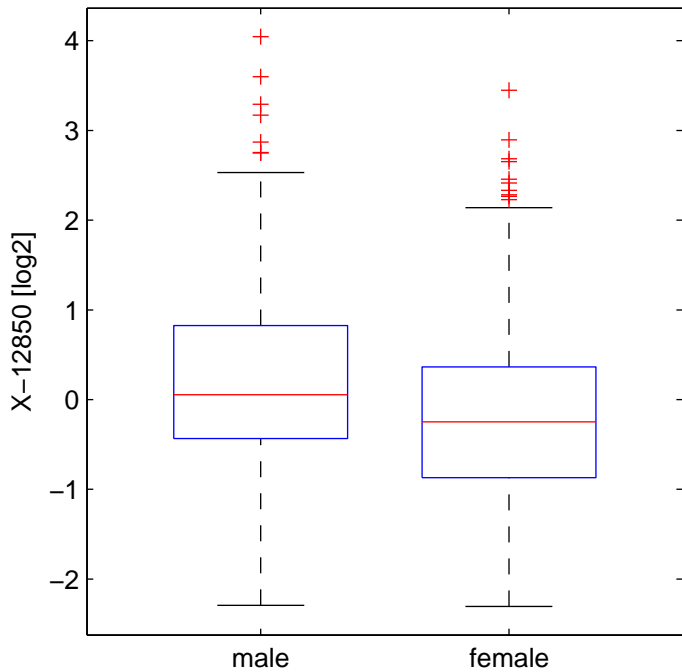

p-val: 5.27e-001

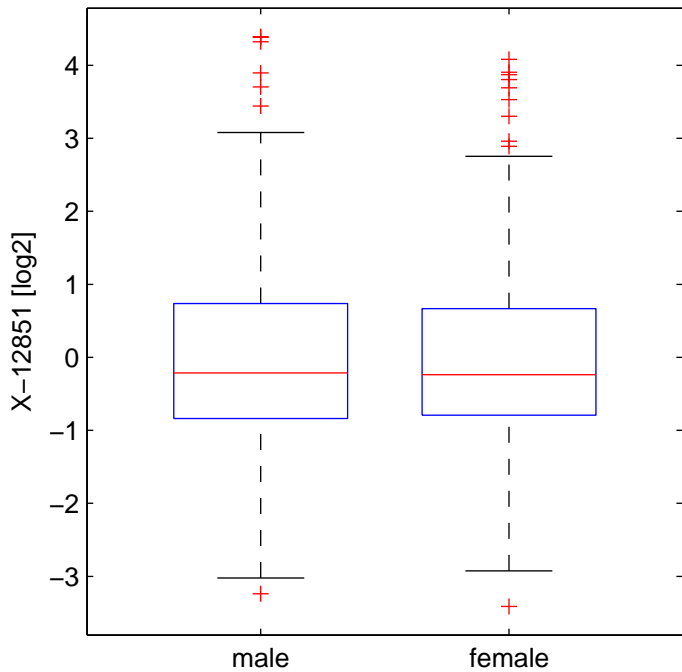

p-val: 7.51e-002

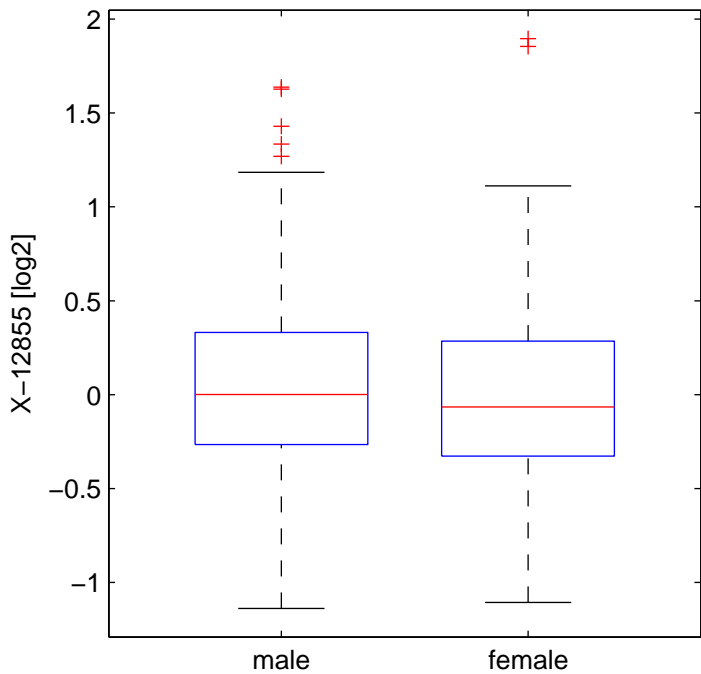



p-val: 1.29e-001

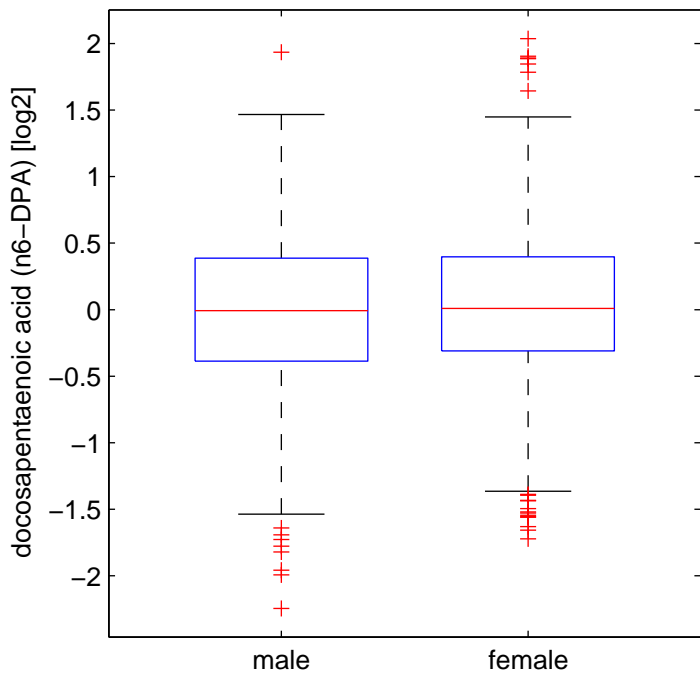

p-val: 1.04e-002

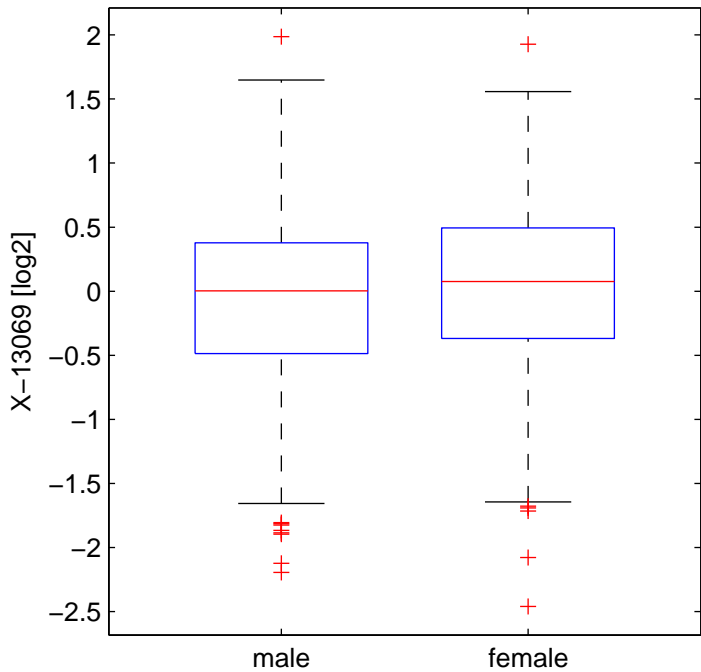

p-val: 7.10e-002

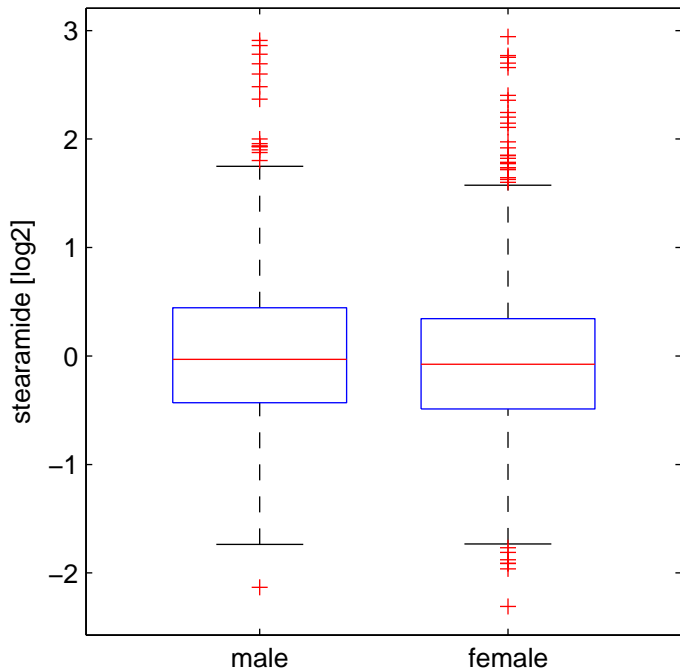

p-val: 1.46e-002

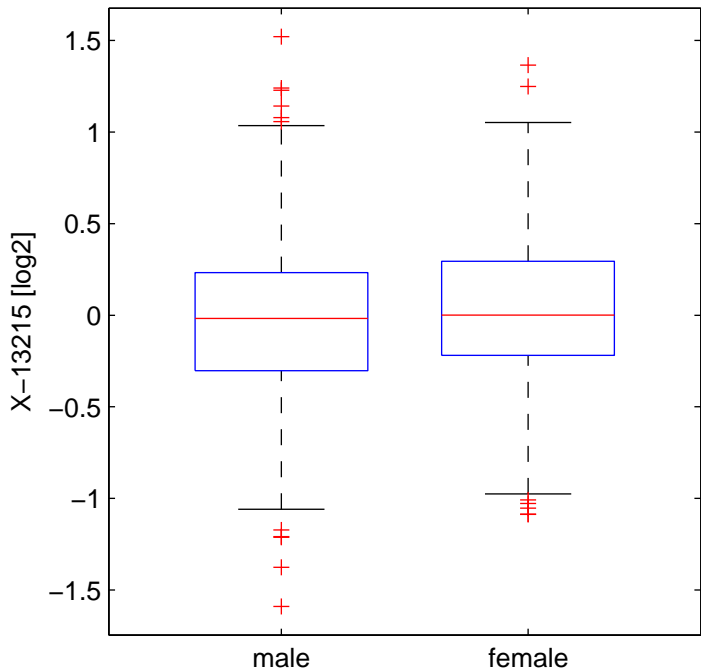

p-val: 5.16e-002

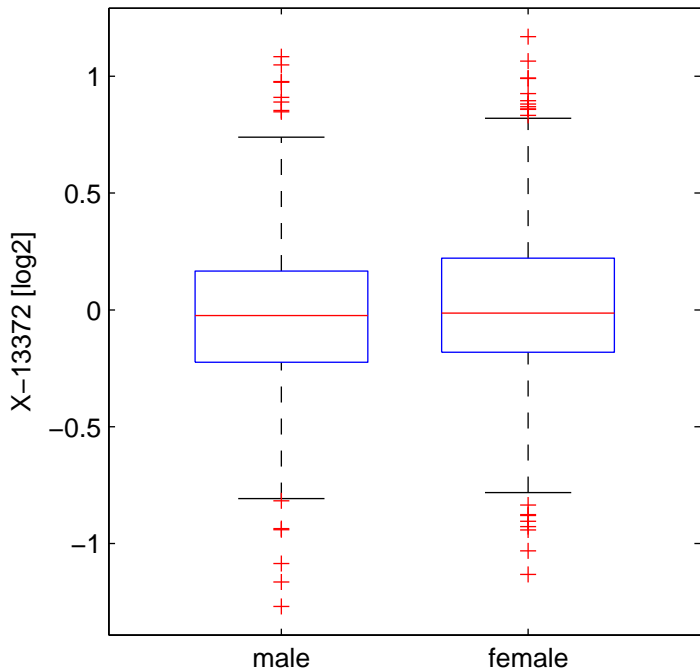

p-val: 4.17e-006

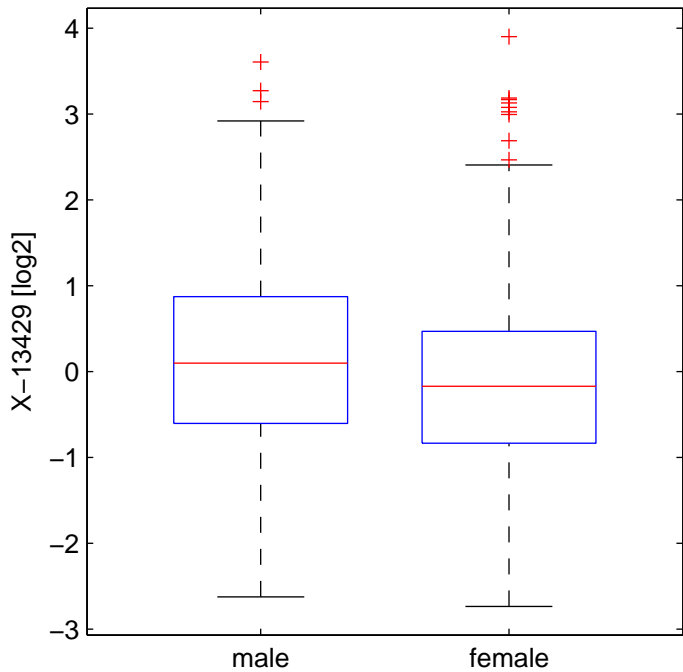

p-val: 2.53e-001

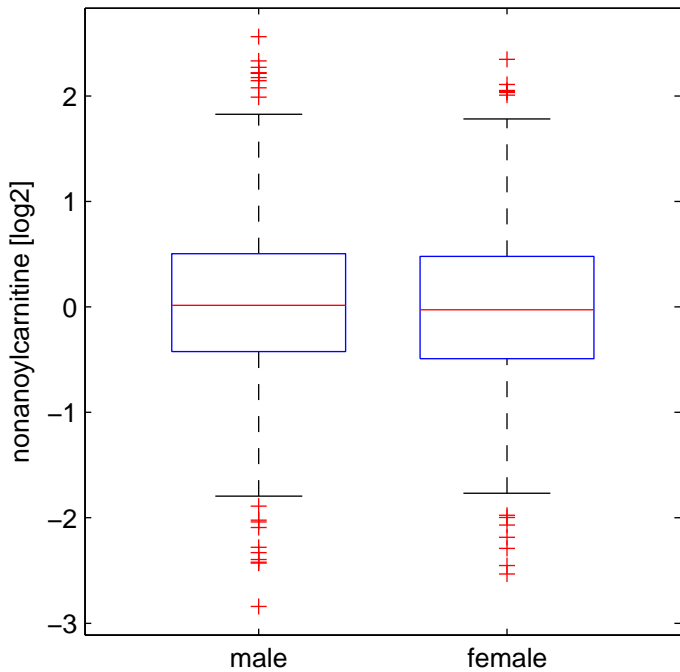

p-val: 5.27e-020

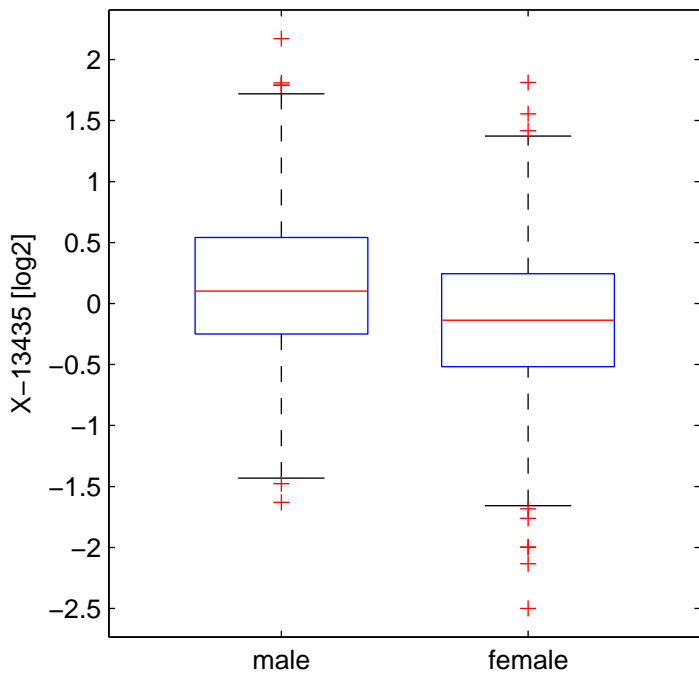



p-val:  $7.69\text{e-}017$

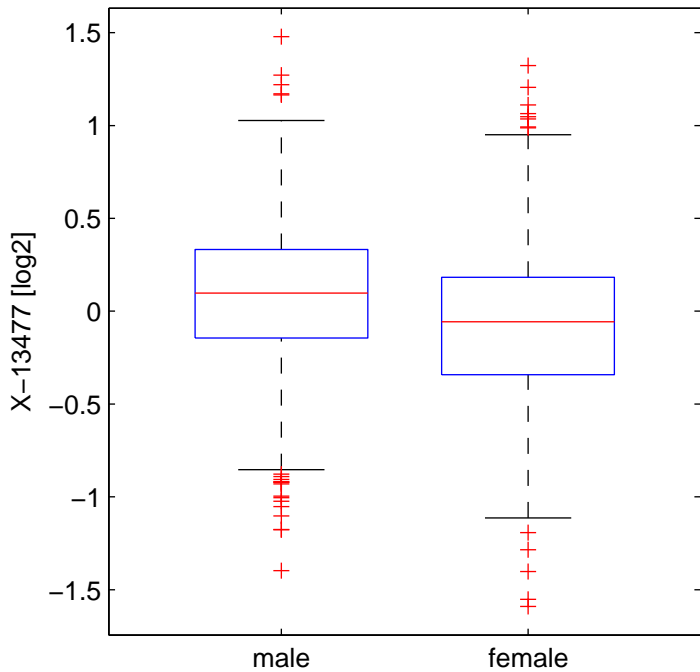

p-val: 4.02e-005

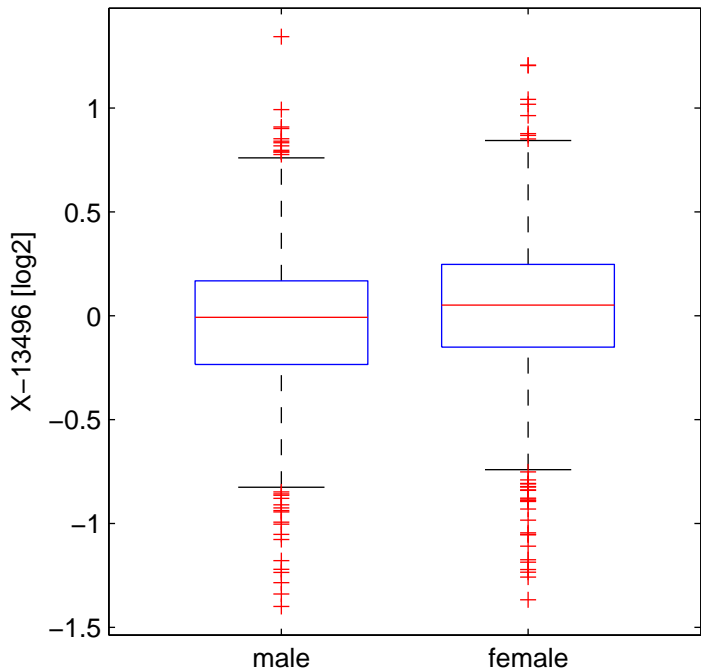

p-val: 2.06e-003

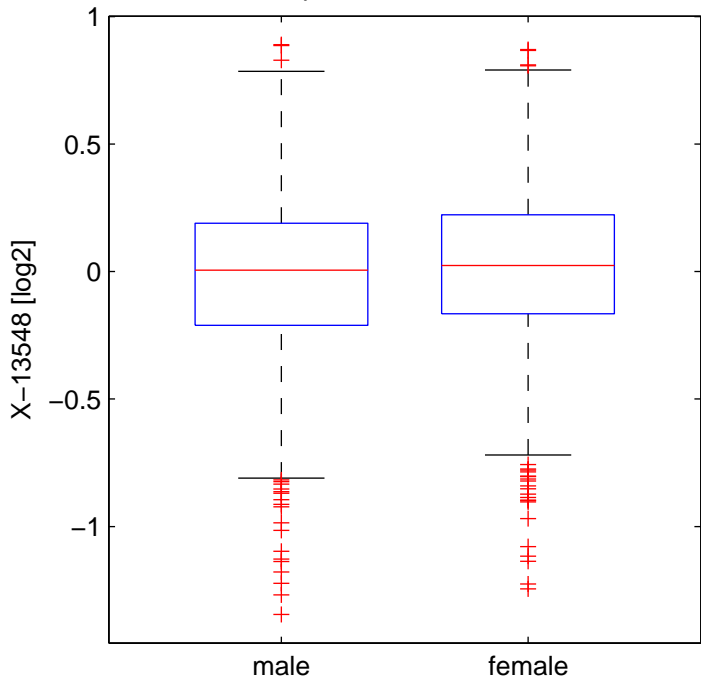

p-val: 3.64e-005

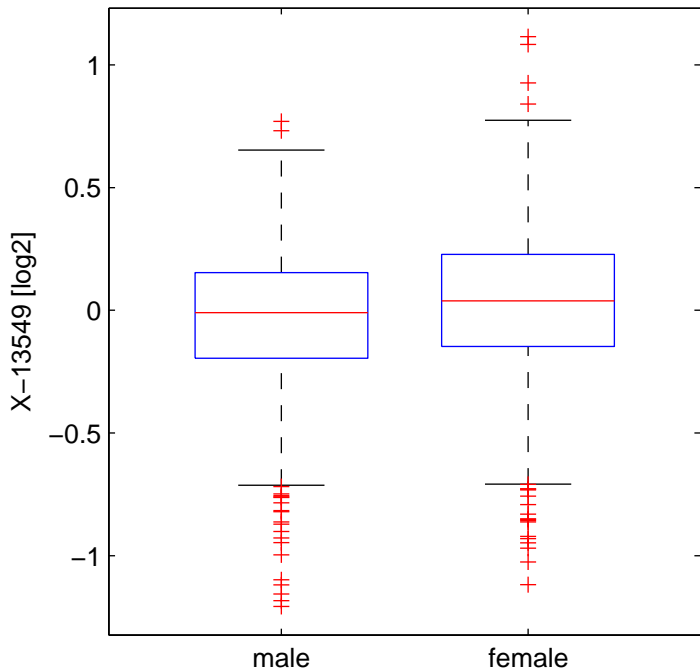

p-val: 2.75e-003

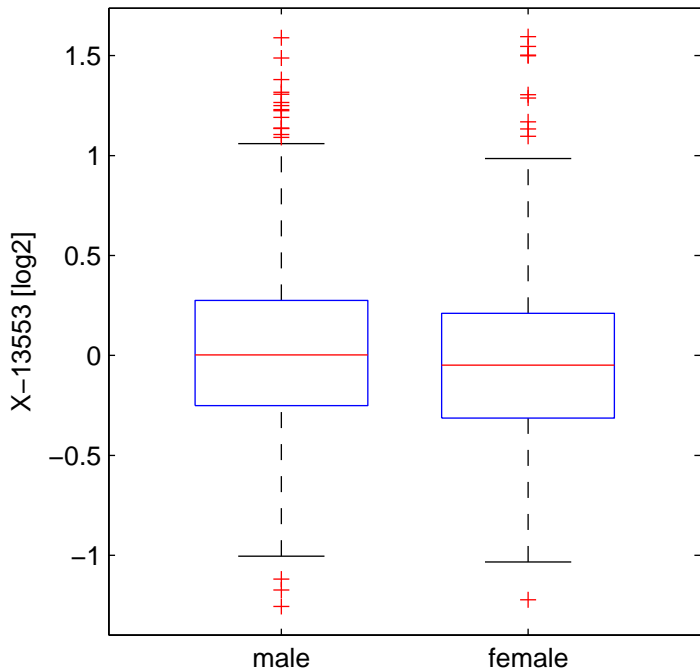

p-val: 2.08e-001

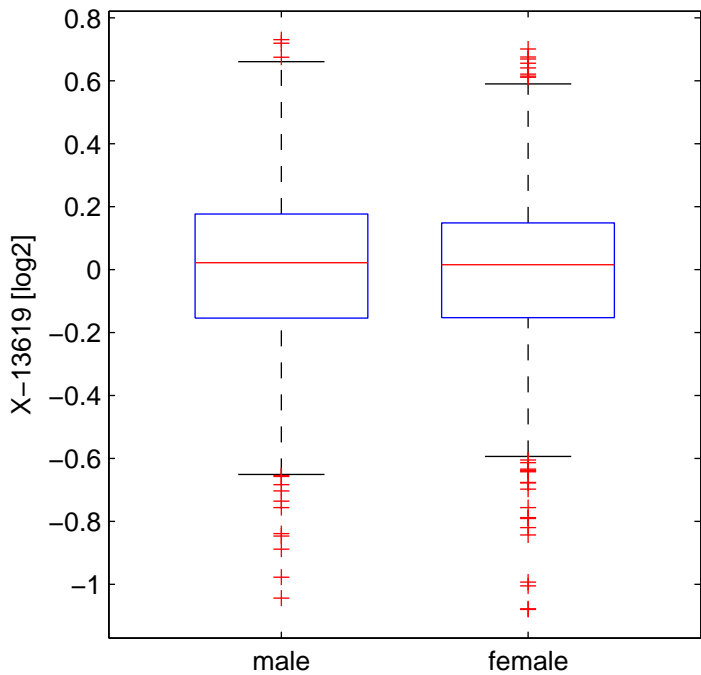

p-val: 9.35e-001

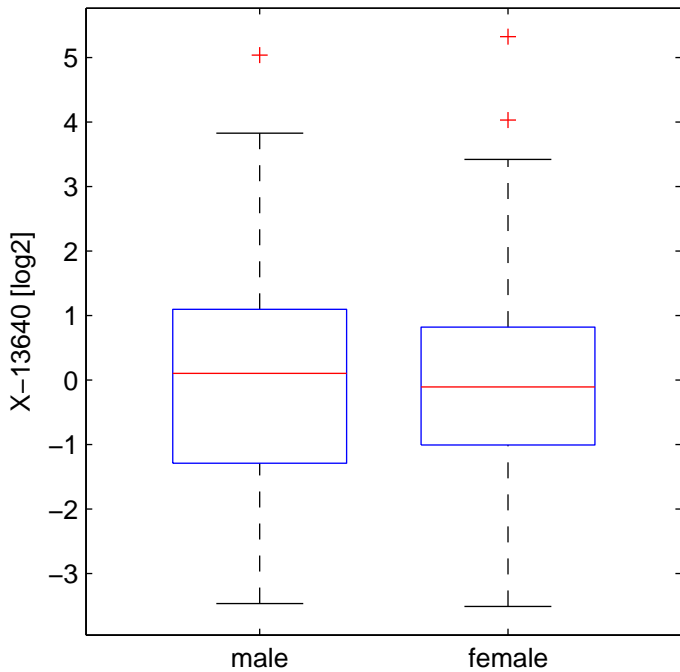

p-val: 9.92e-001

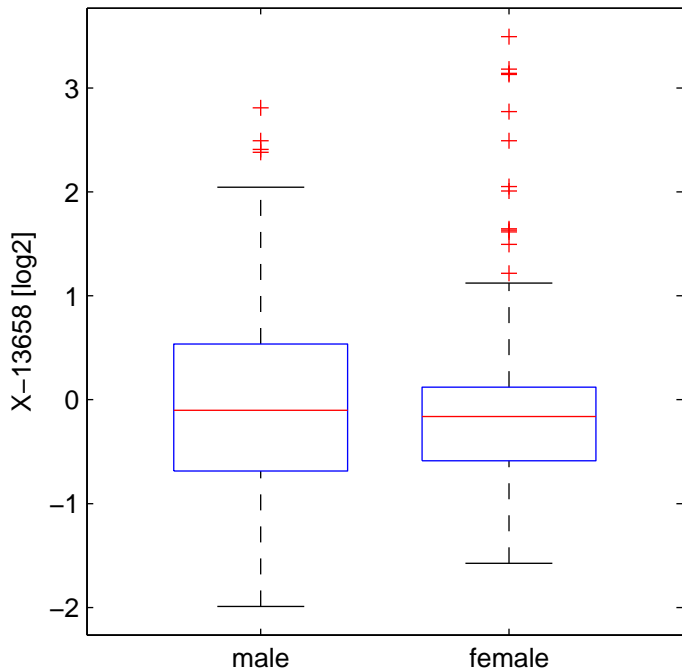



p-val: 8.73e-001

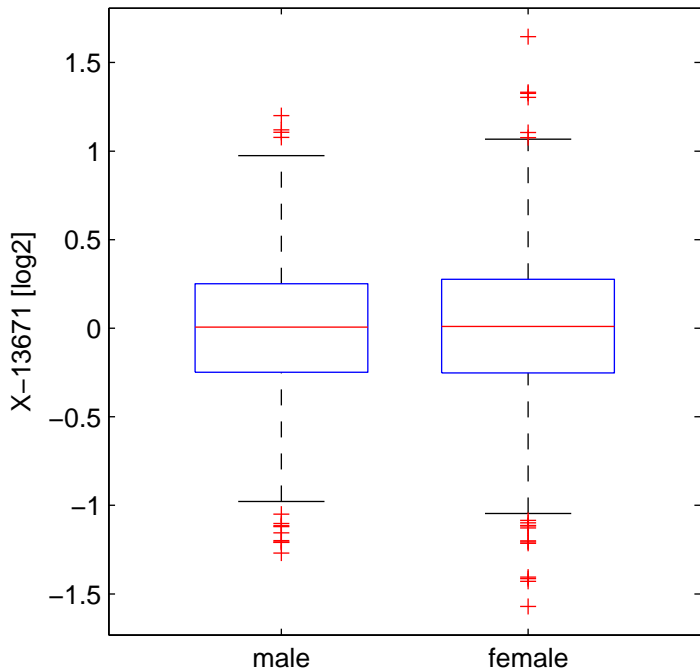

p-val: 2.47e-001

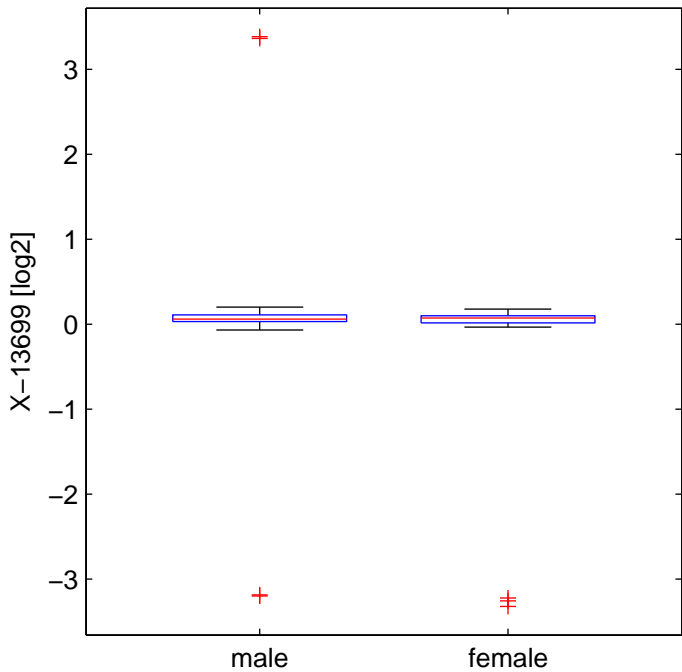

p-val: 8.39e-007

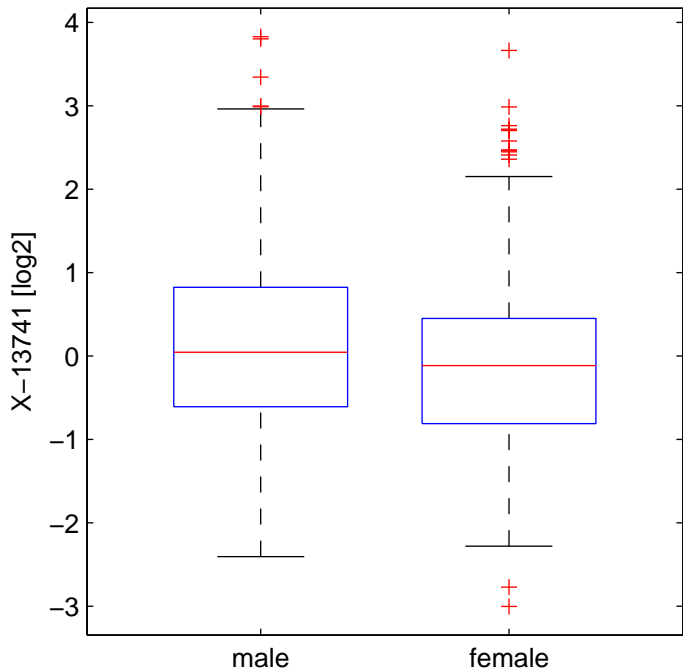

p-val: 4.95e-001

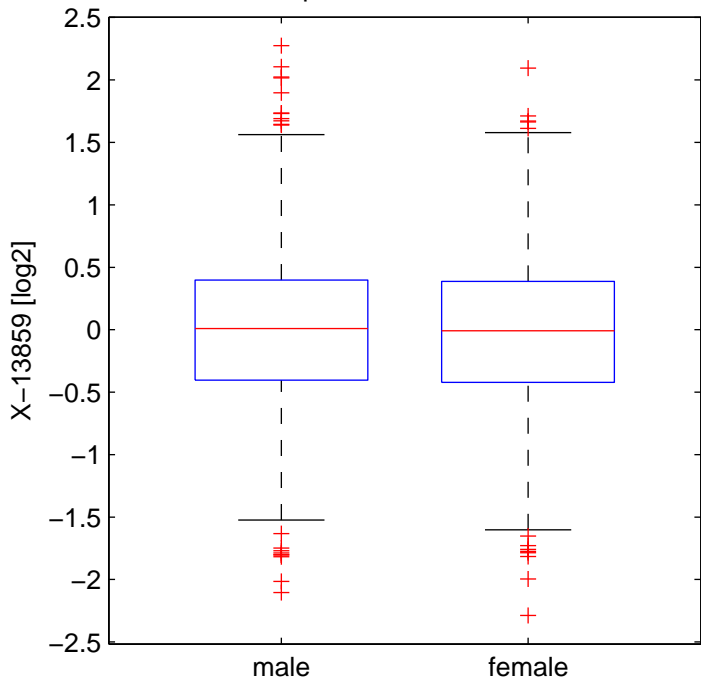

p-val: 4.31e-002

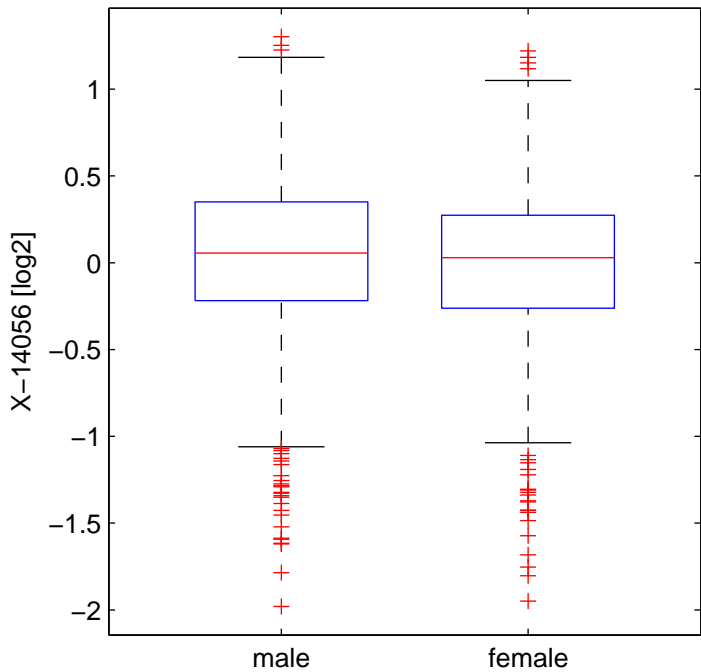

p-val: 5.00e-001

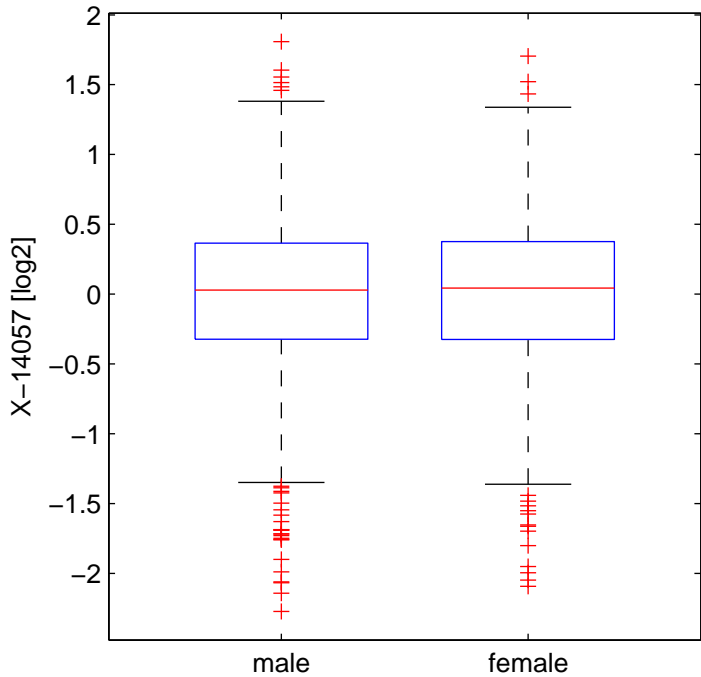

p-val: 6.35e-003

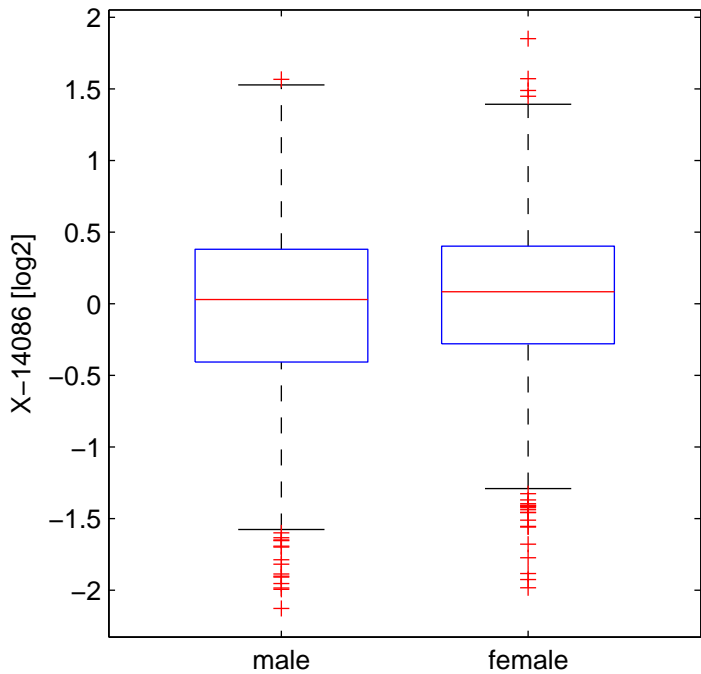

p-val: 6.87e-008

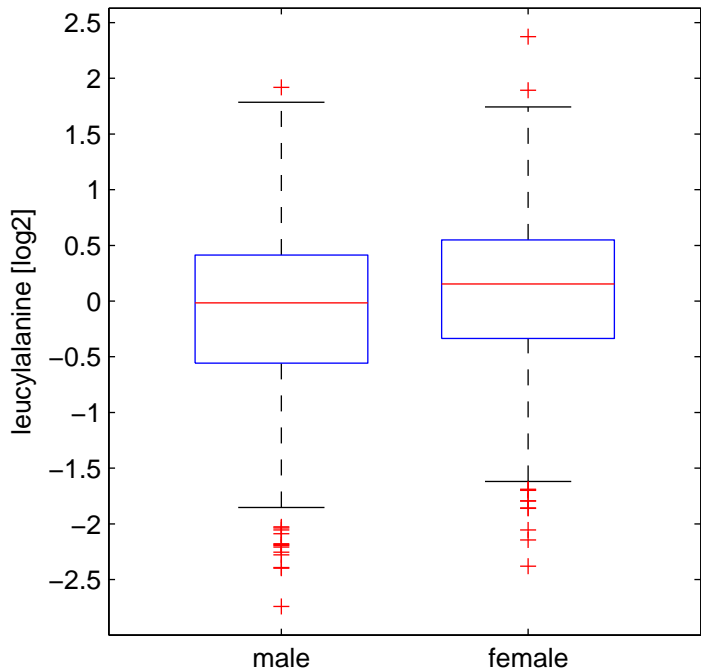



p-val: 7.13e-003

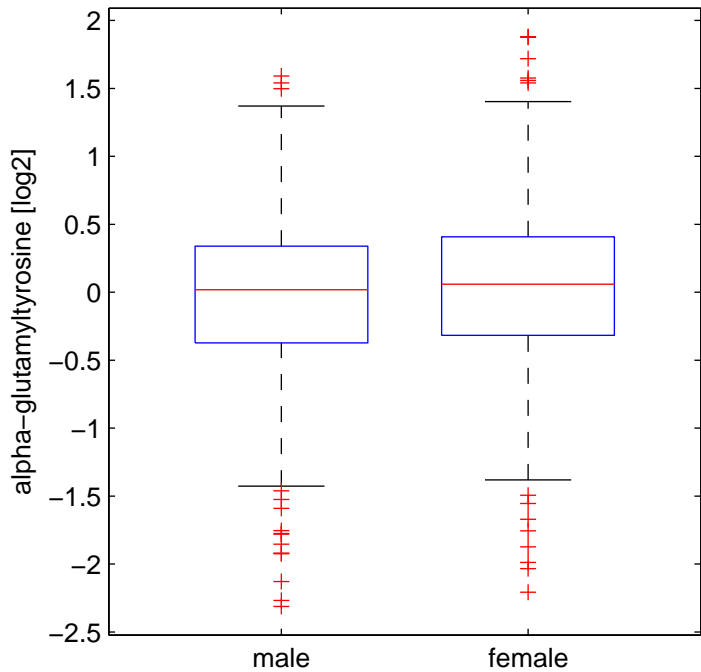

p-val: 9.00e-001

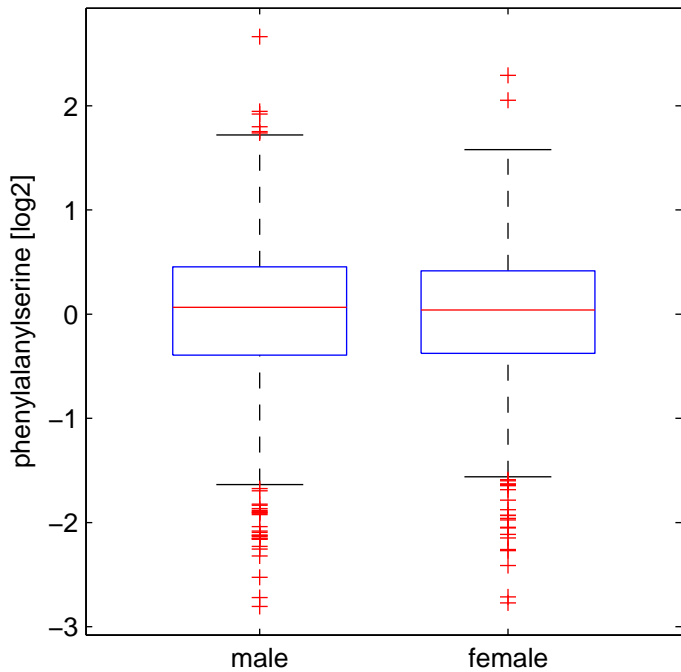

p-val: 3.54e-017

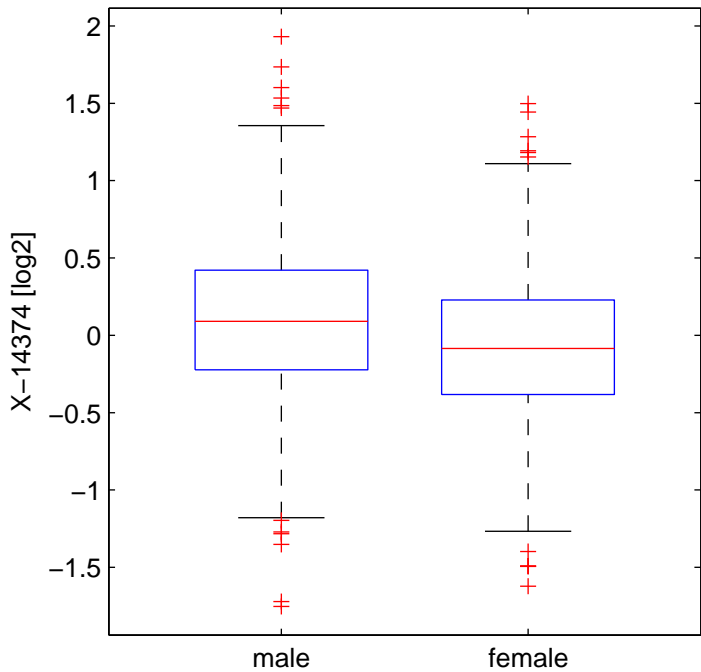

p-val: 1.96e-003

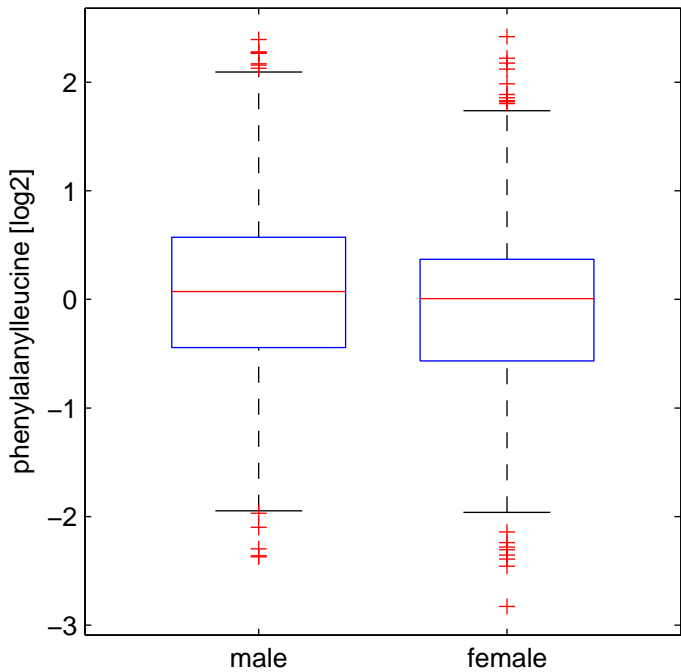

p-val: 3.12e-021

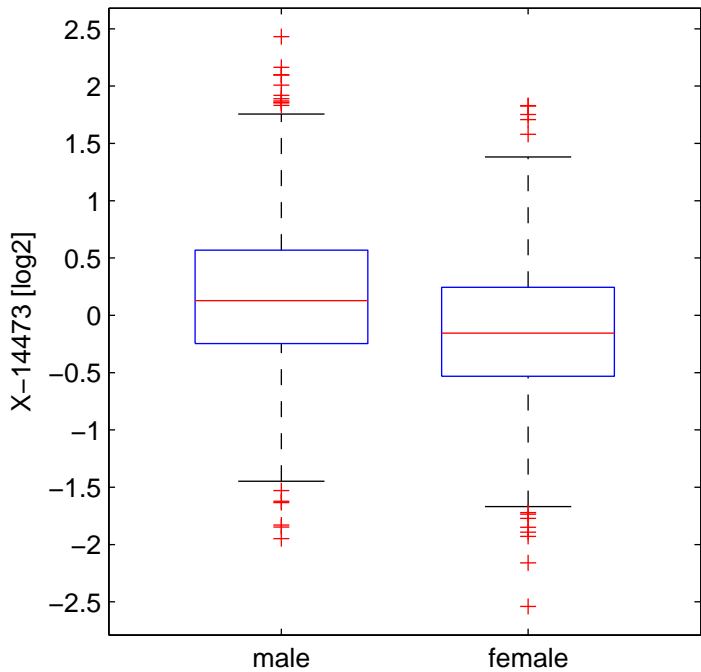

p-val: 8.71e-001

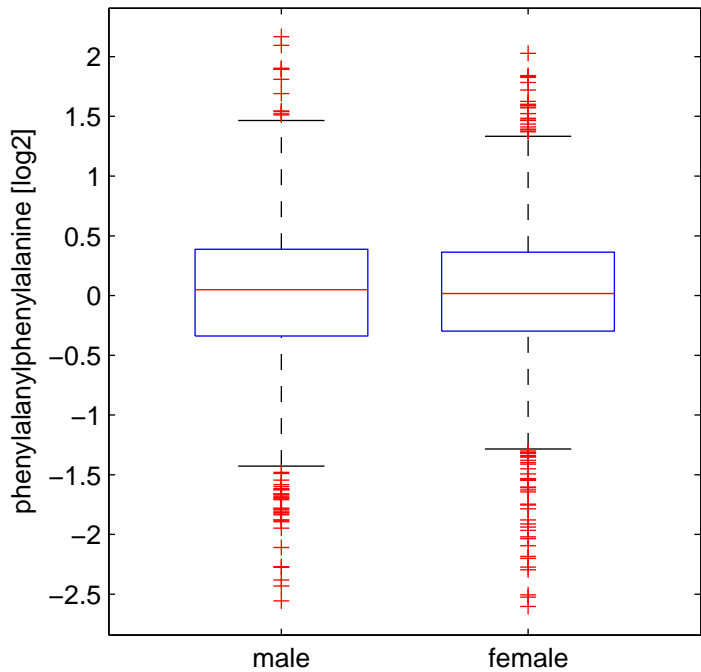

p-val: 4.87e-010

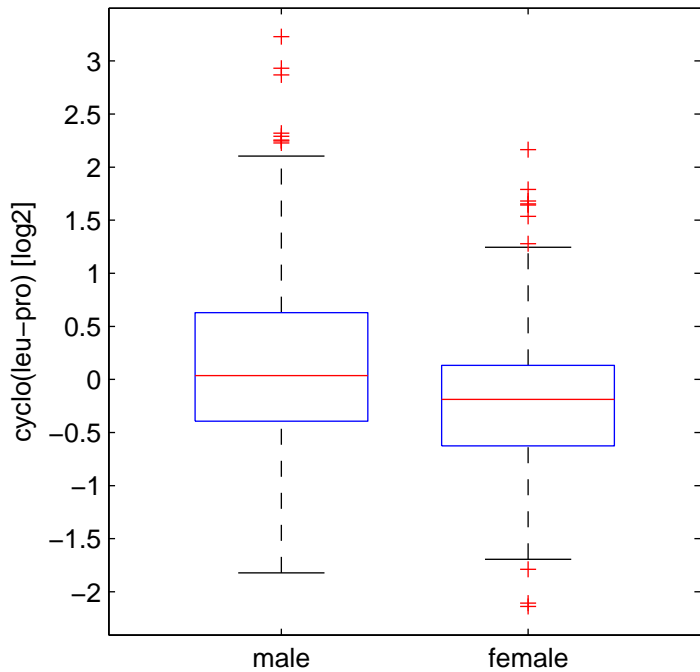

p-val: 8.58e-002

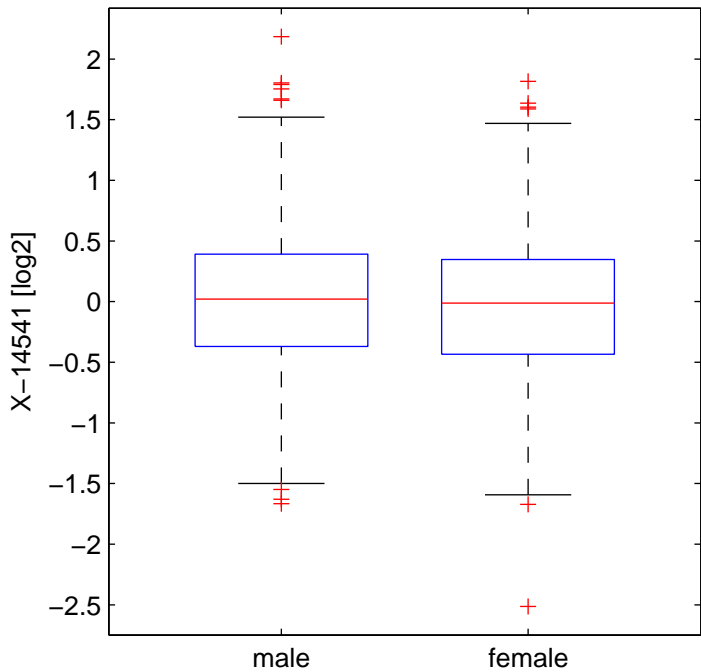



p-val: 9.15e-001

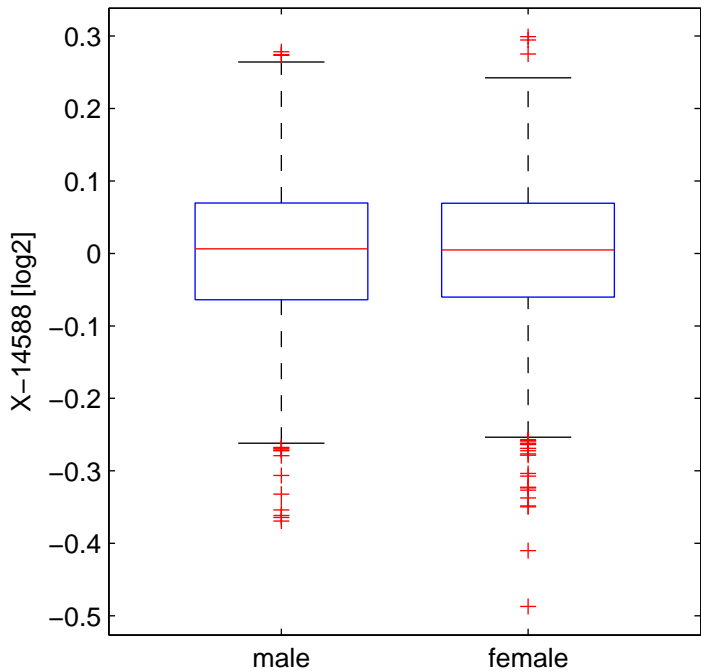

p-val: 1.40e-004

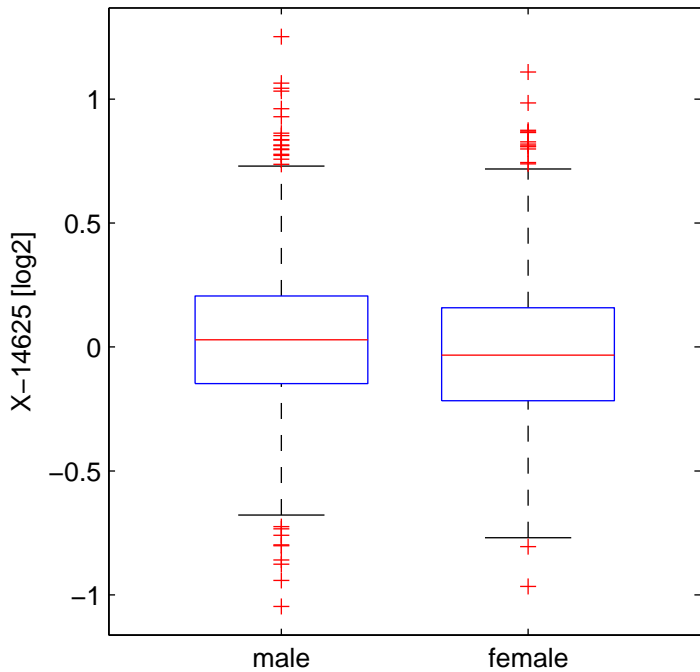

p-val: 4.94e-002

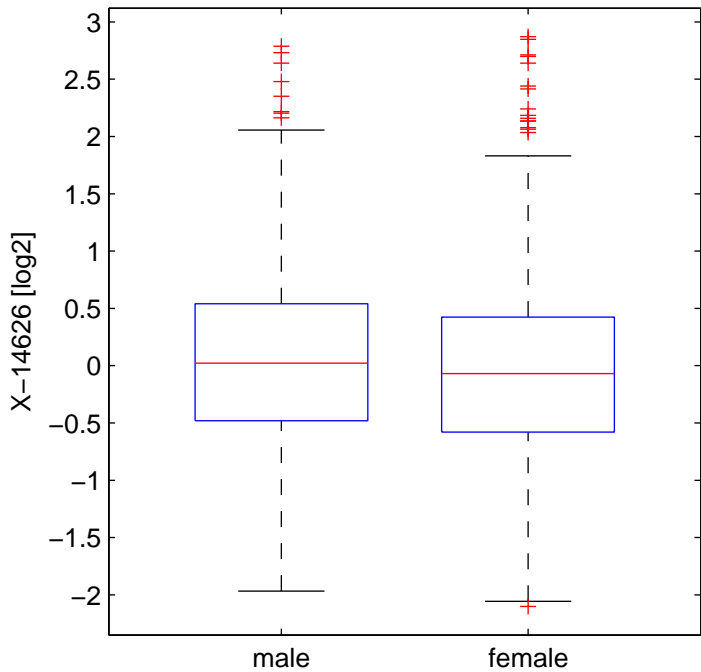

p-val: 2.10e-001

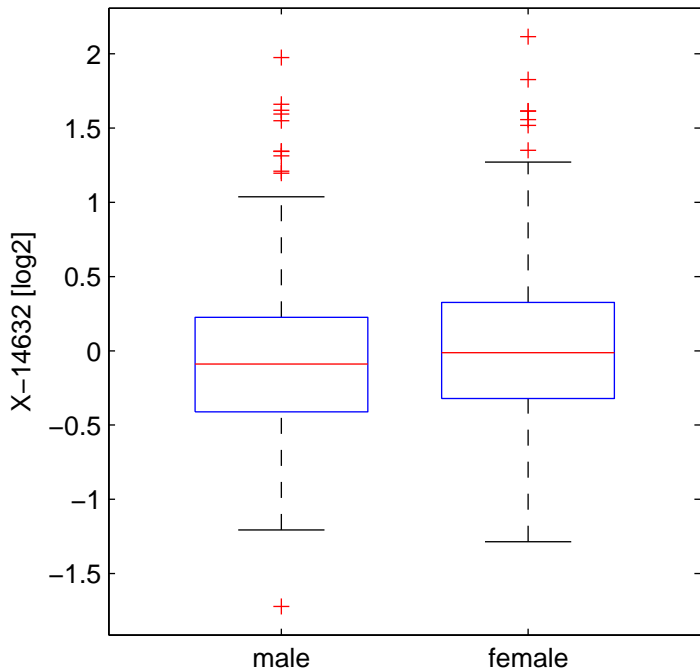

p-val: 4.23e-003

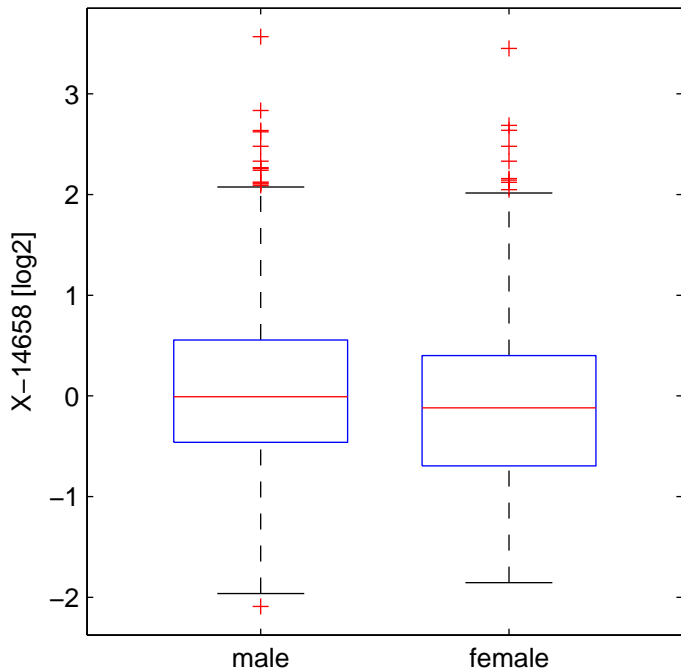

p-val: 1.08e-005

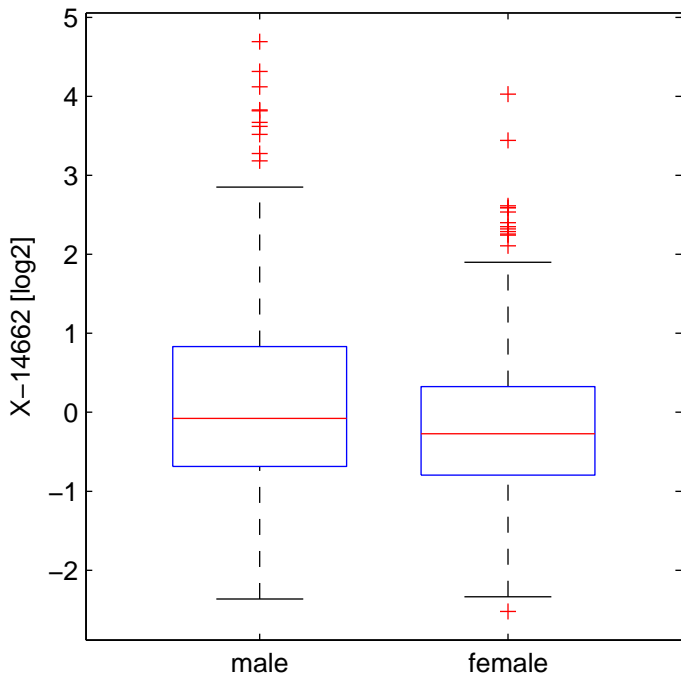

p-val: 7.35e-001

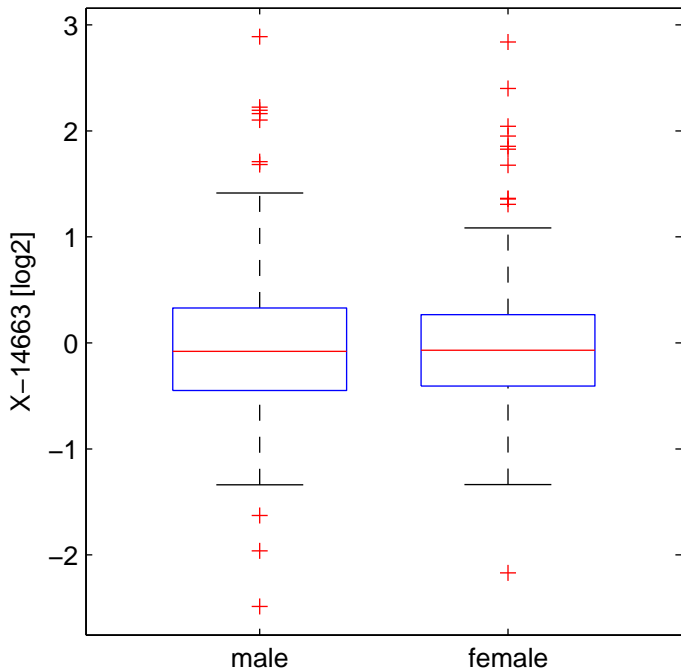

p-val: 6.01e-001

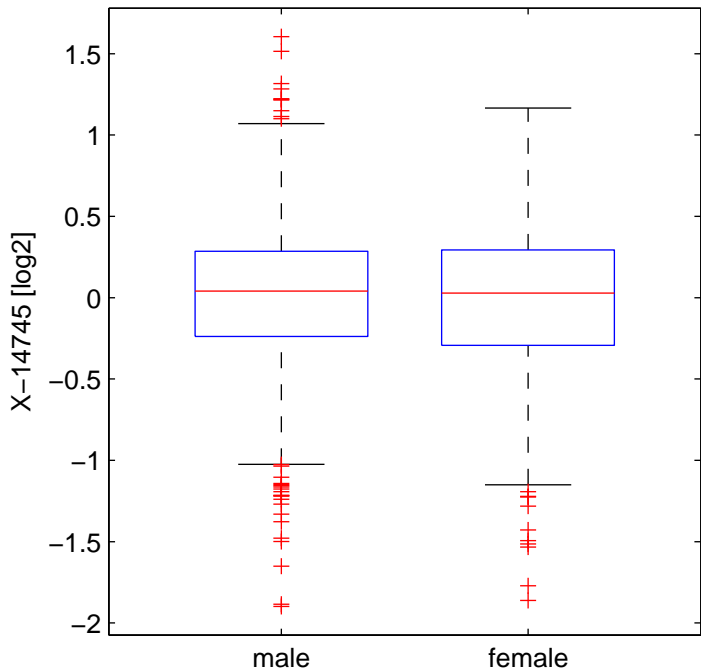



p-val: 5.59e-002

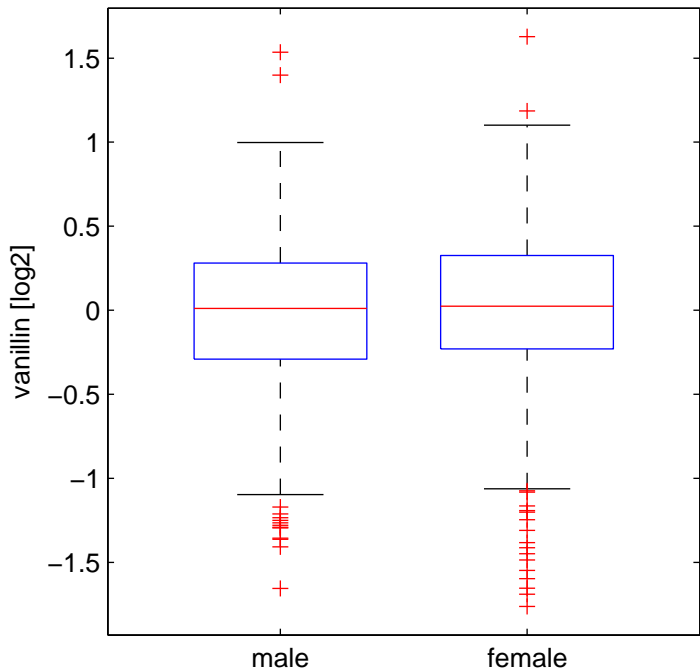

## KORA pathway boxplots

p-val: 1.85e-001

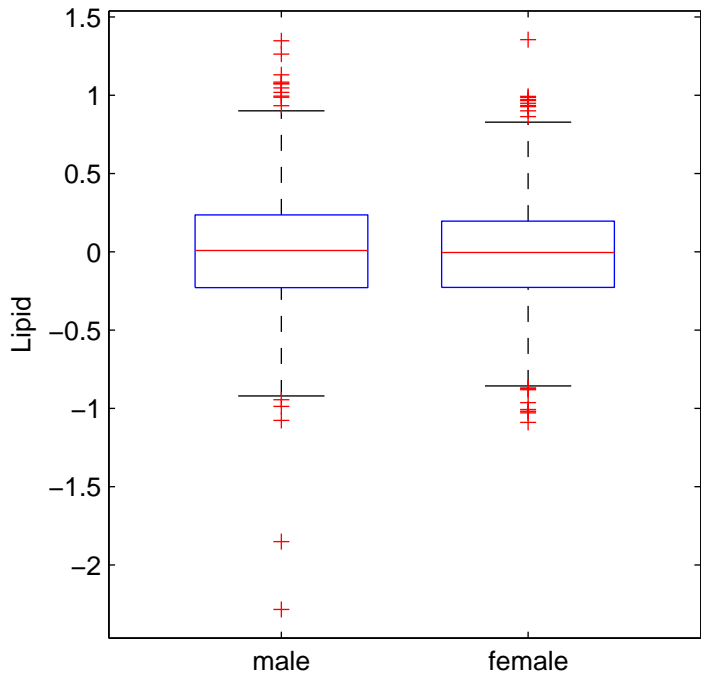

p-val: 6.55e-004

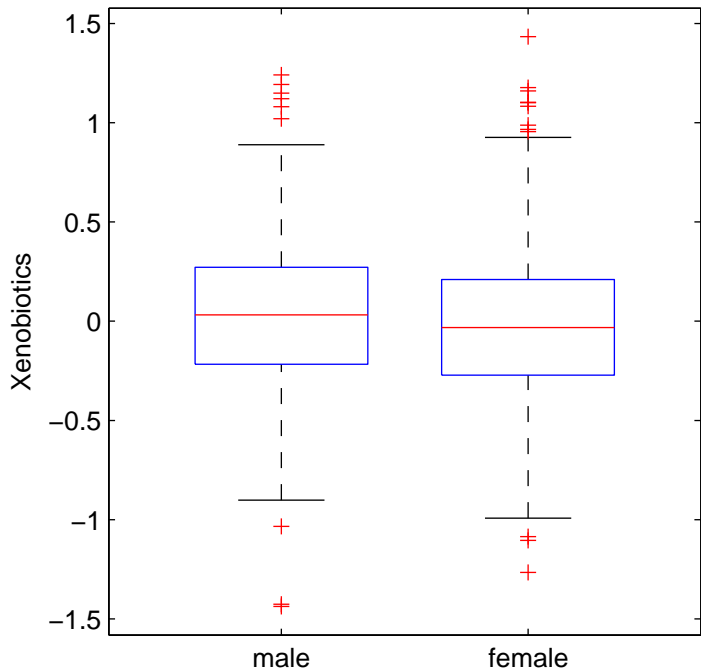

p-val: 1.43e-023

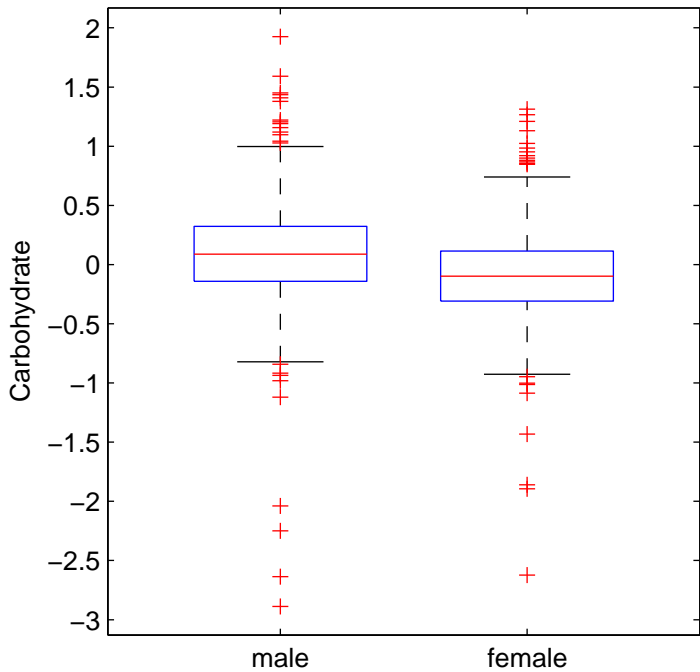

p-val: 3.26e-073

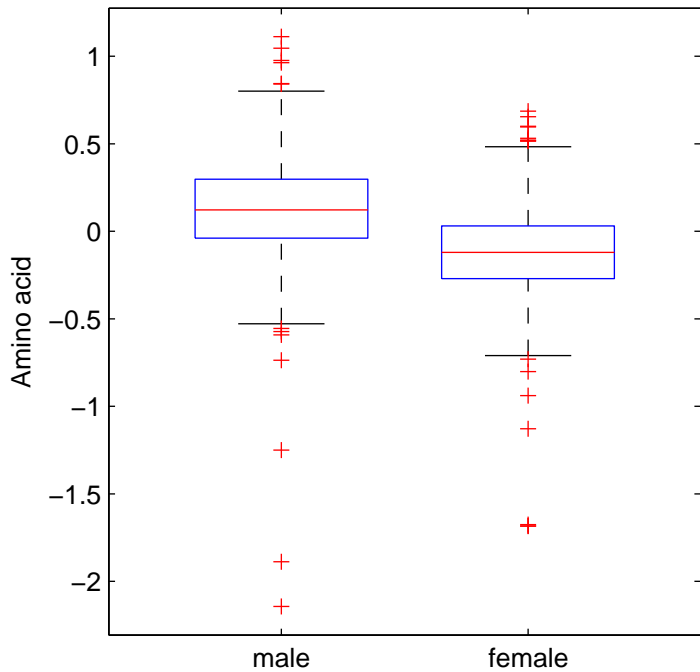

p-val: 2.16e-004

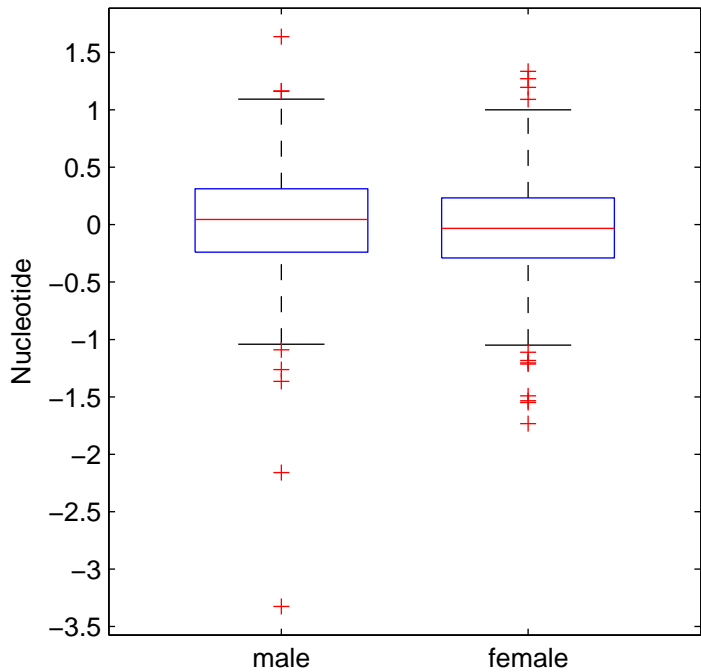

p-val: 4.12e-008

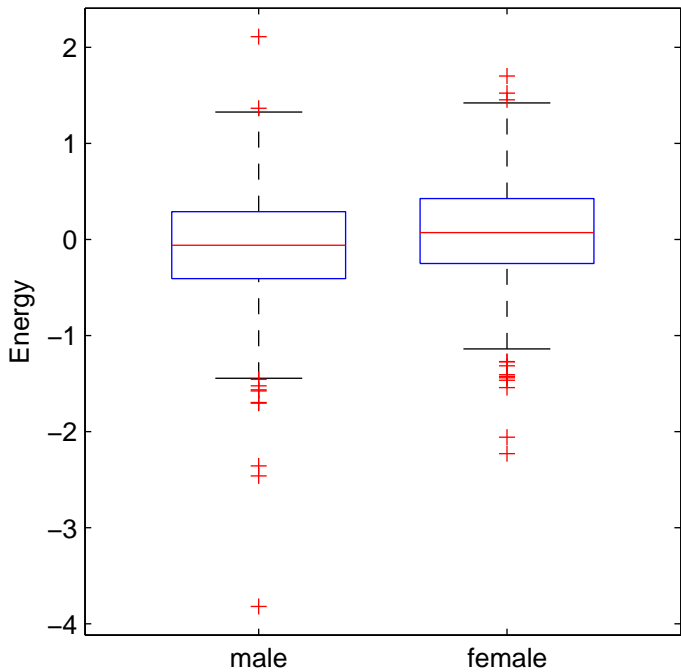



p-val: 6.47e-015

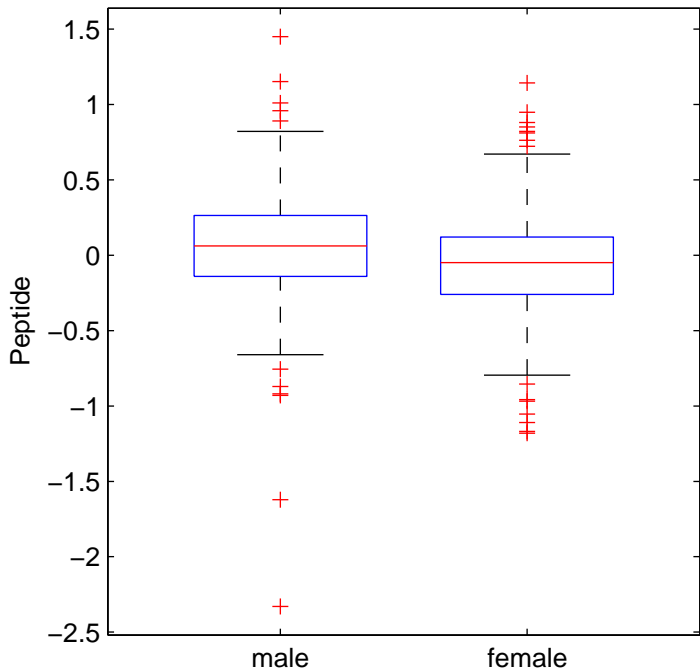

p-val: 2.41e-002

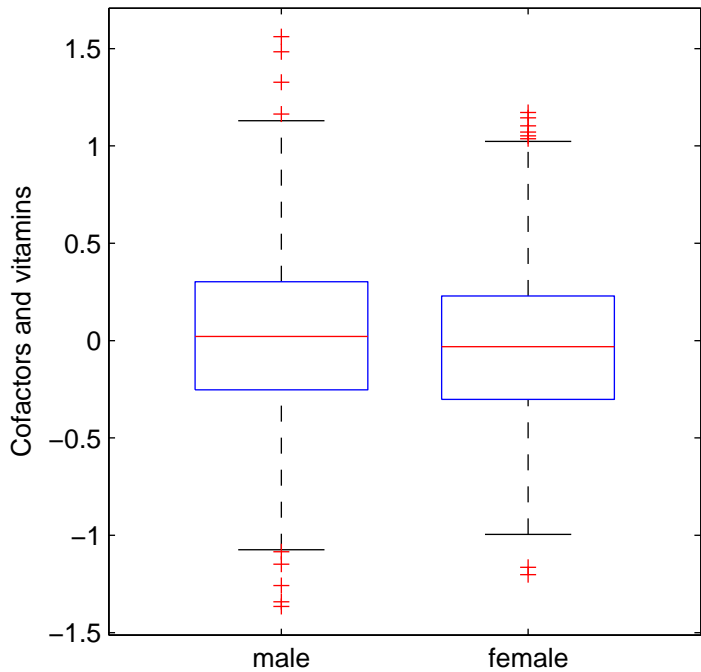

p-val: 2.99e-002

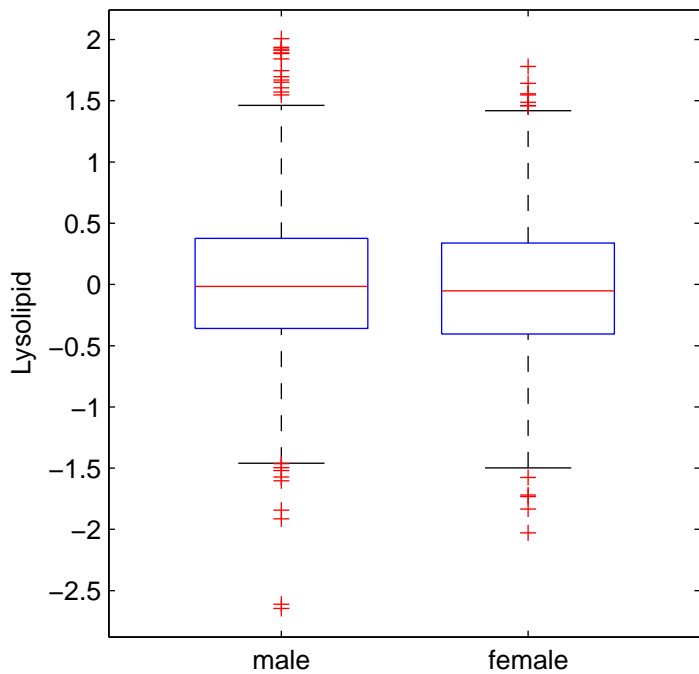

p-val: 8.93e-001

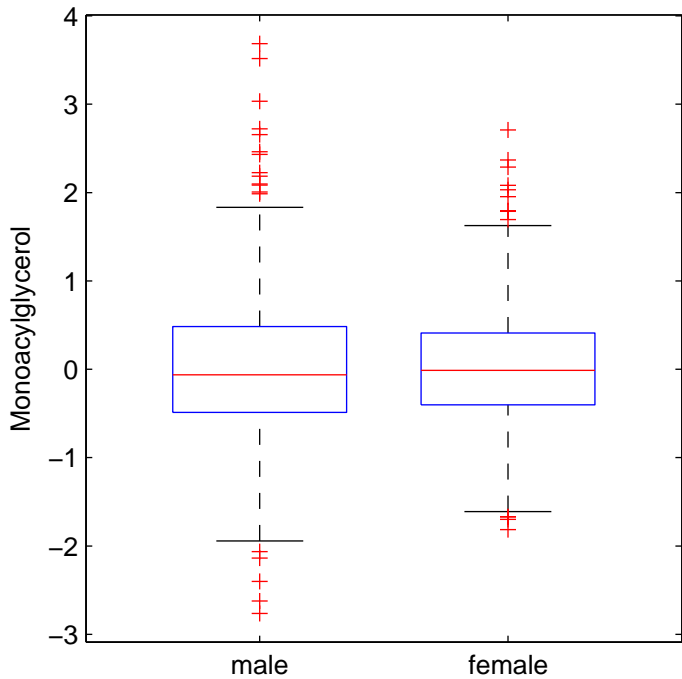

p-val: 5.00e-002

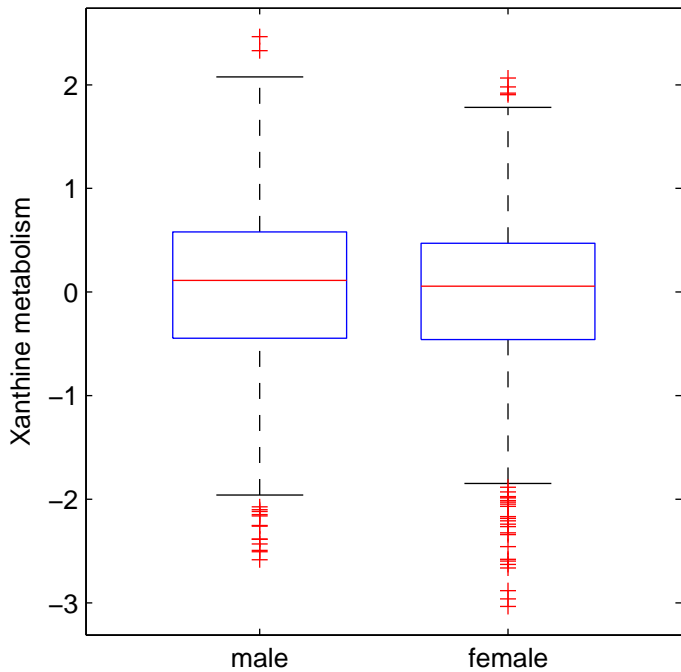

p-val: 5.96e-018

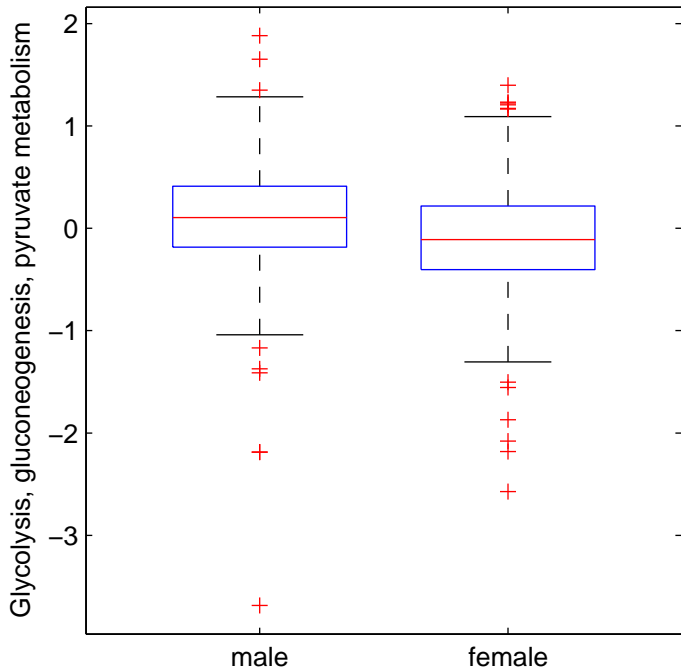

p-val: 3.73e-012

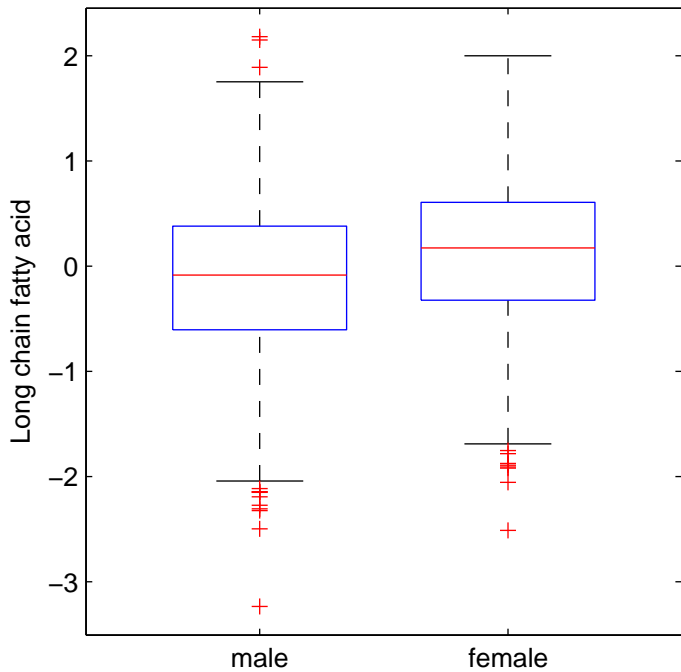

p-val: 3.01e-015

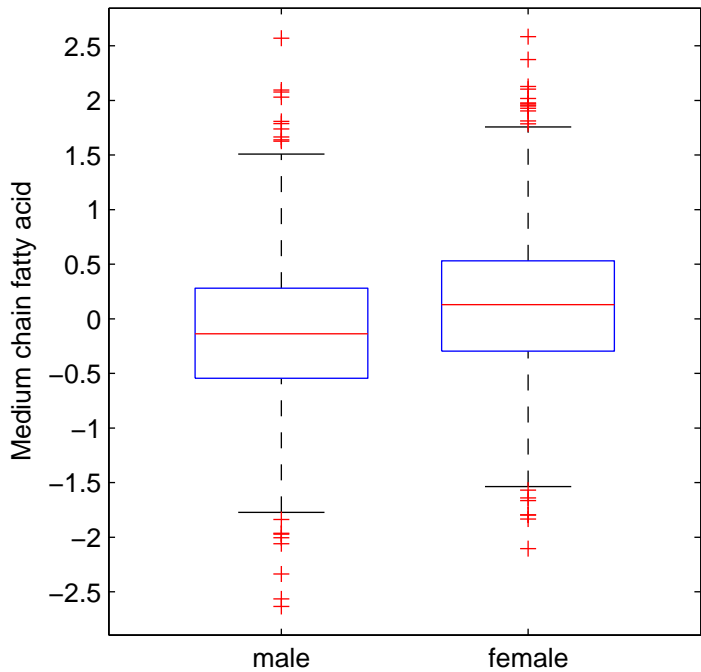



p-val: 4.32e-006

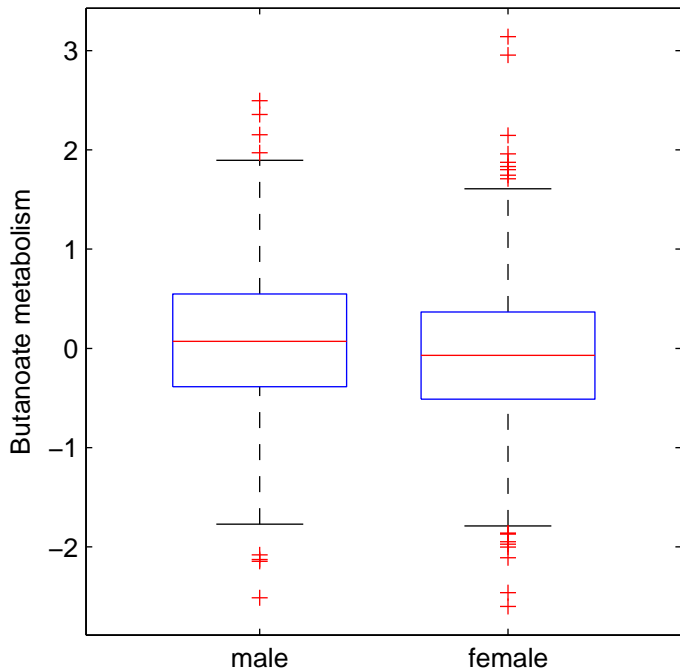

p-val: 6.05e-002

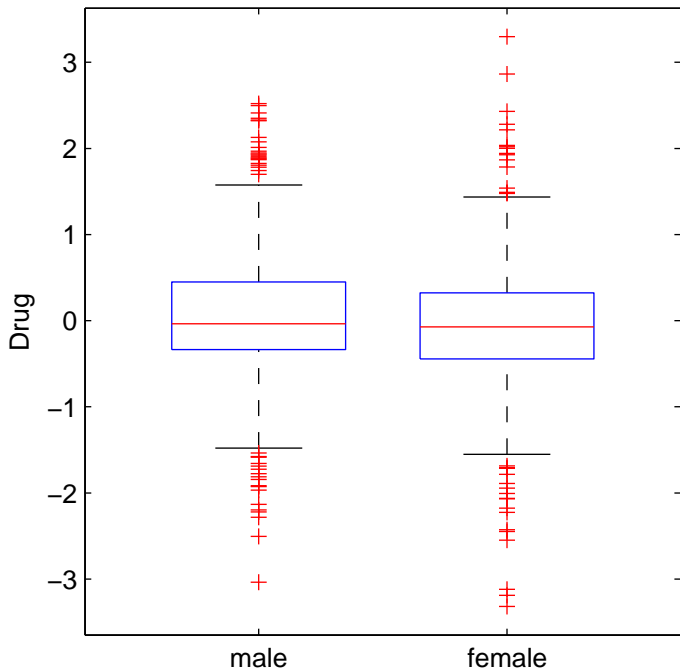

p-val: 2.43e-018

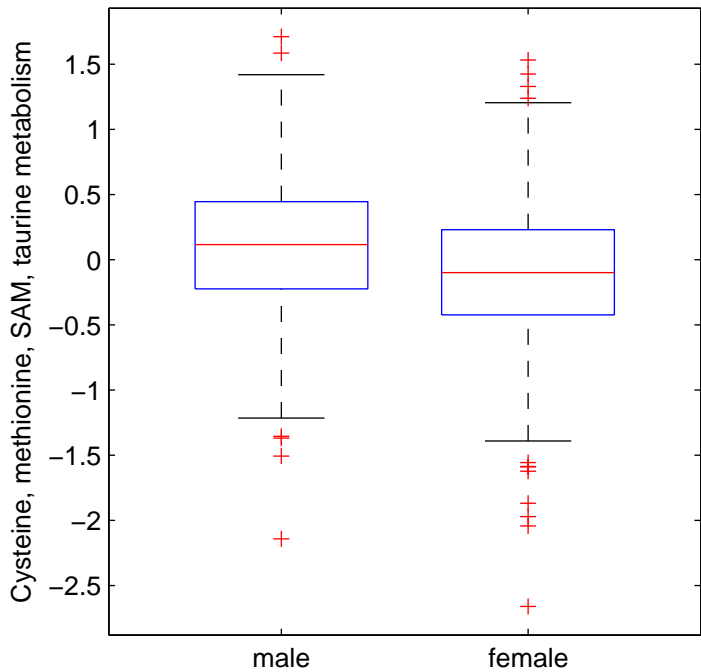

p-val: 3.75e-002

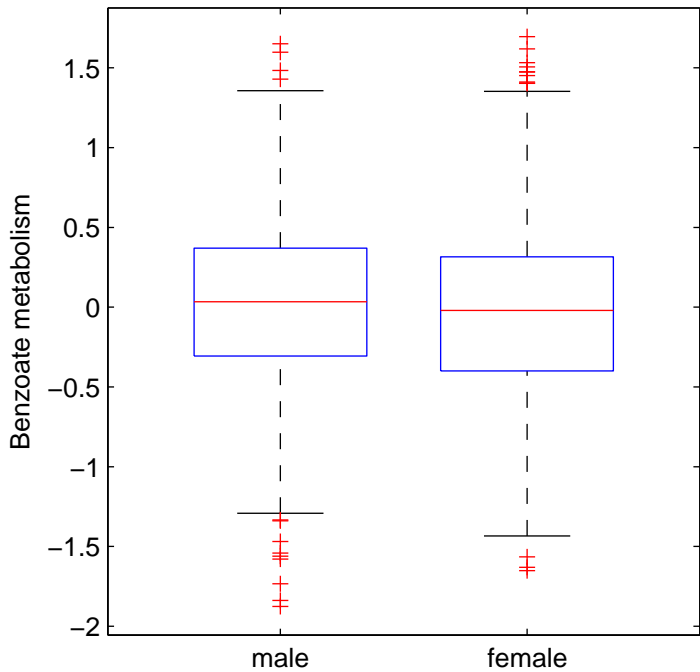

p-val: 8.89e-004

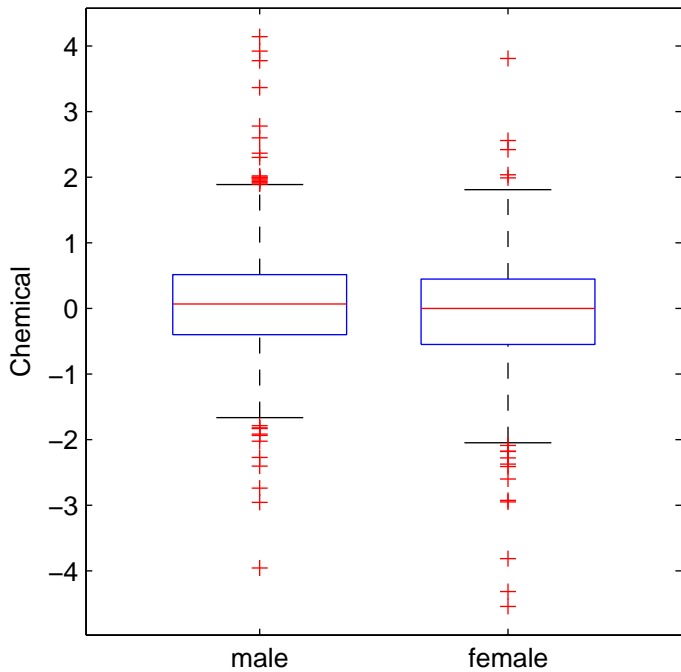

p-val: 1.57e-001

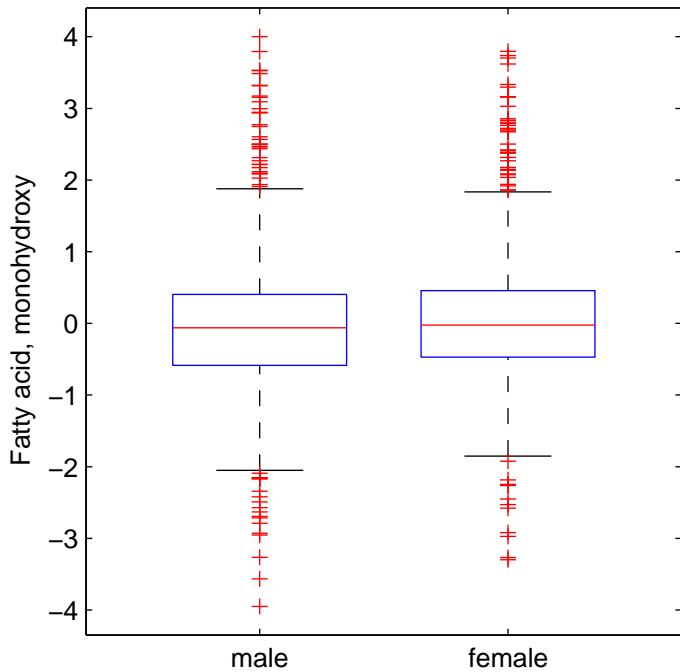

p-val: 3.16e-128

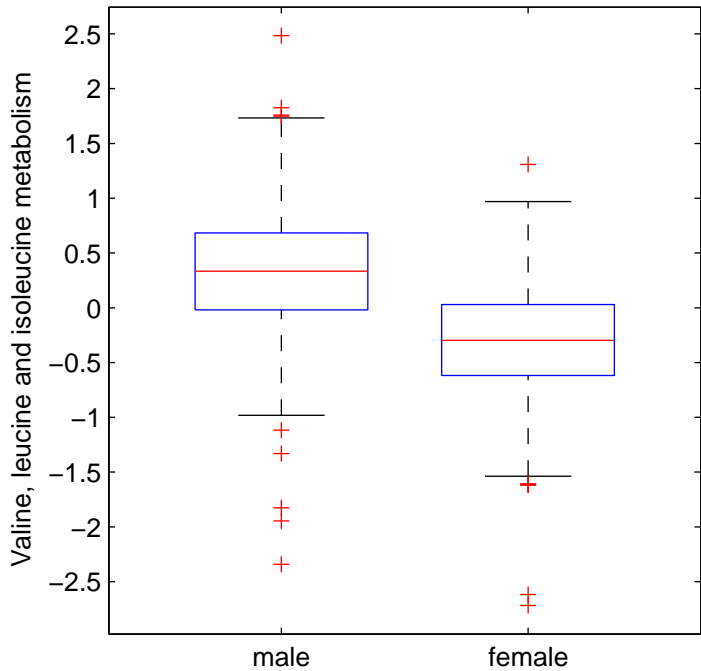

p-val: 2.13e-006

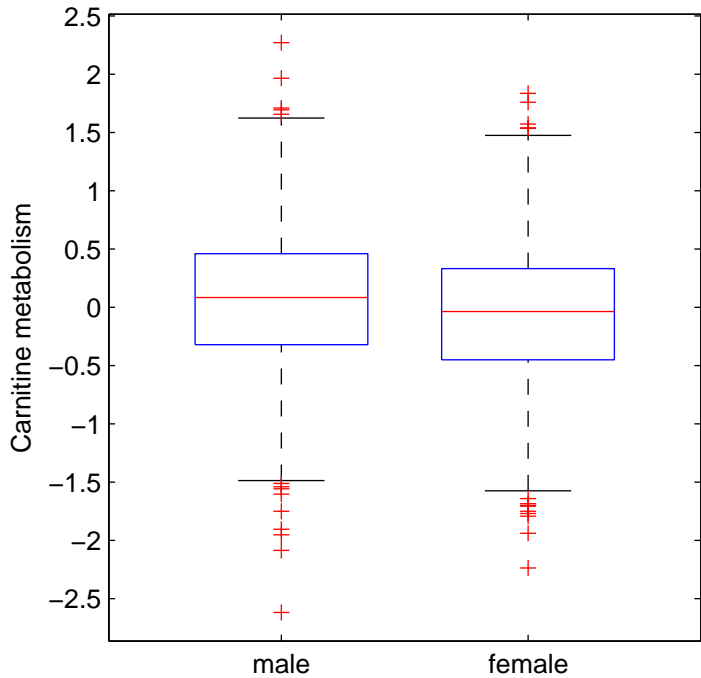



p-val:  $3.53e-026$

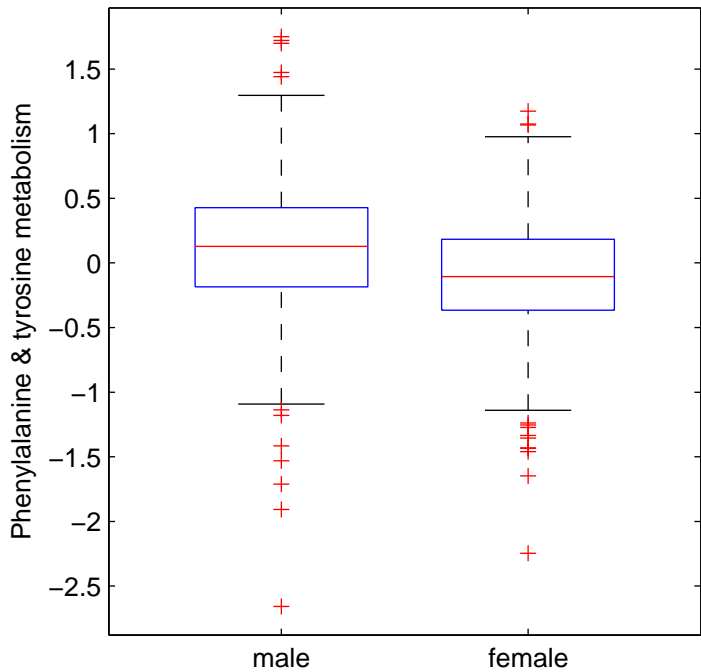

p-val: 5.68e-012

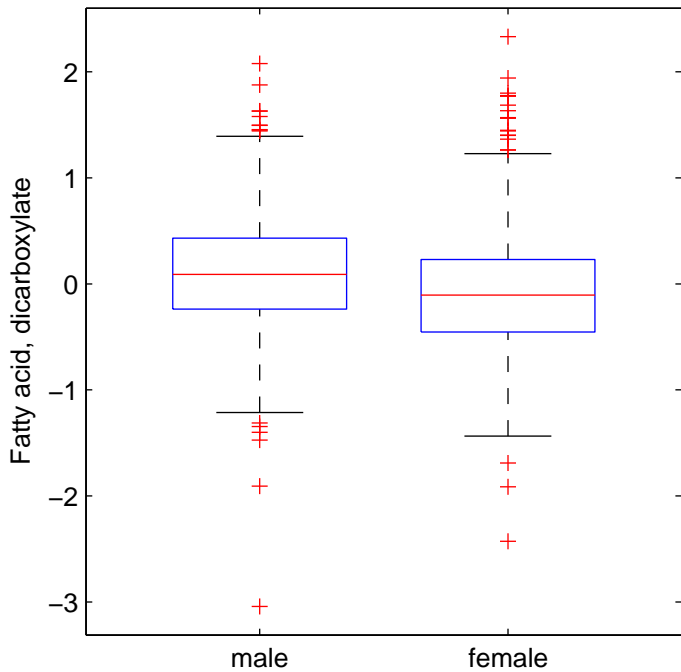

p-val: 8.31e-003

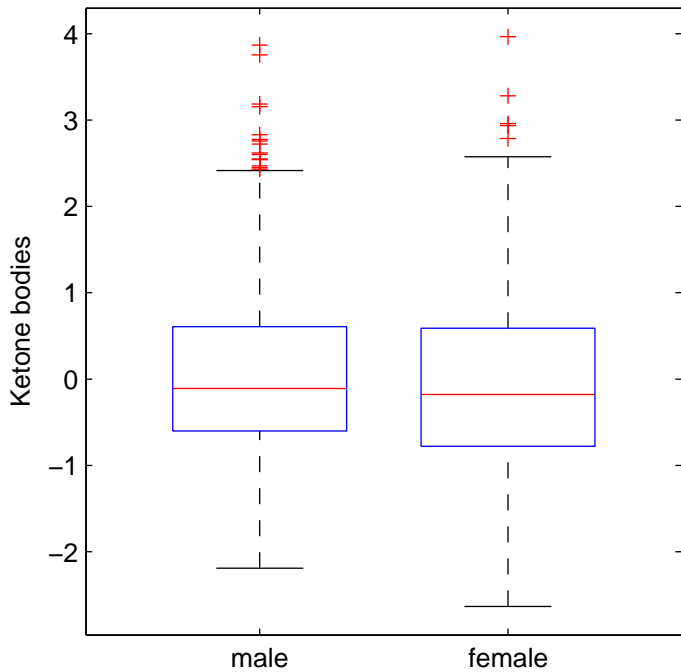

p-val: 3.89e-018

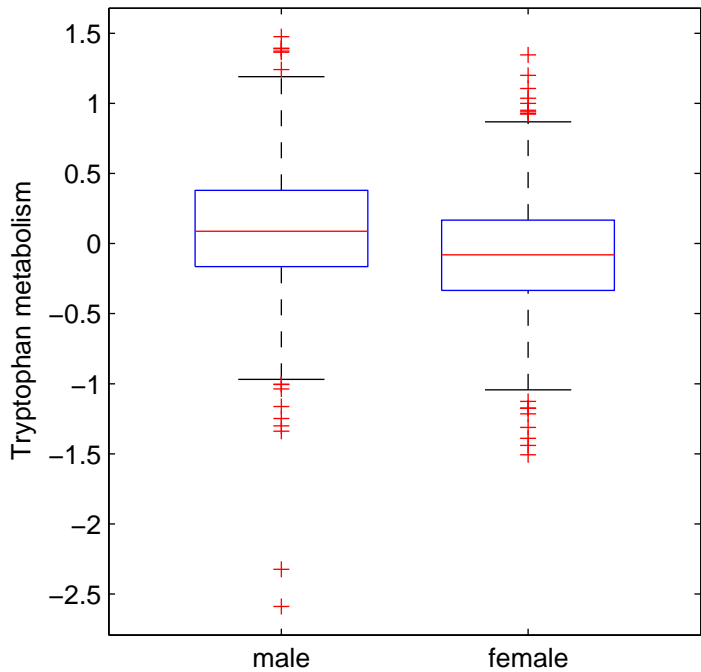

p-val: 1.30e-002

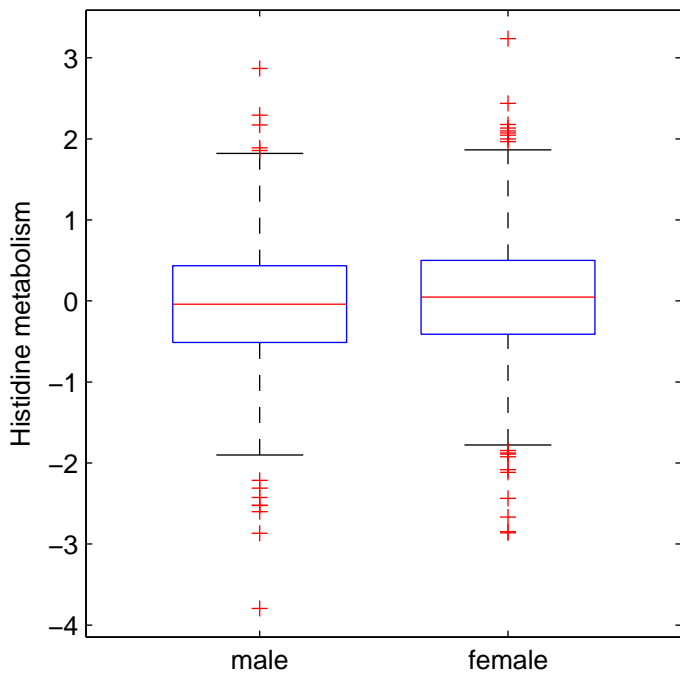

p-val: 1.55e-001

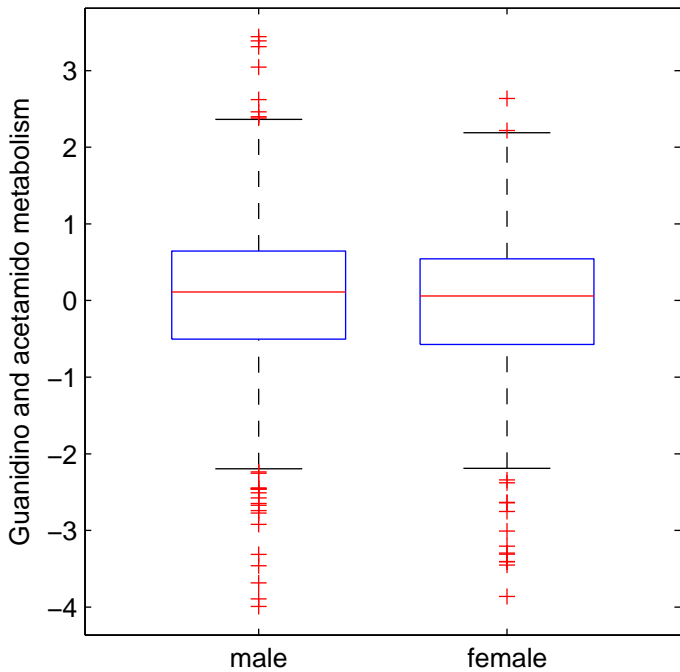

p-val: 3.04e-001

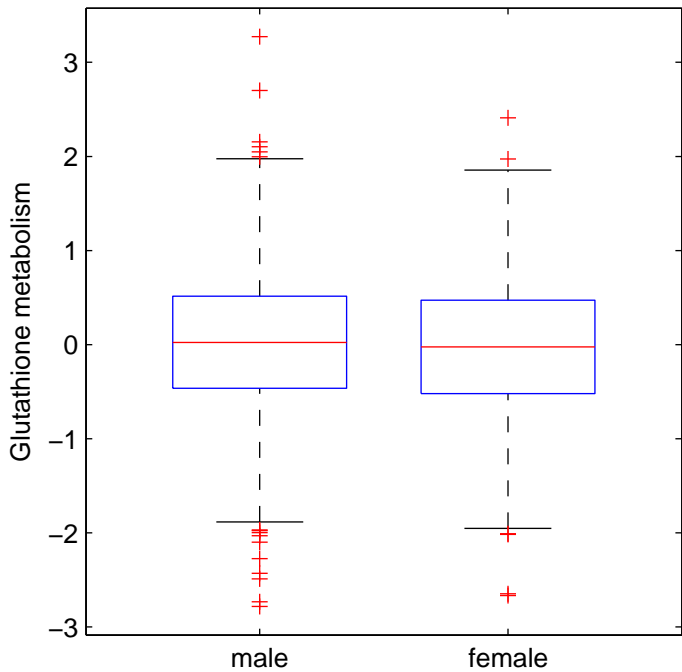

p-val: 4.34e-078

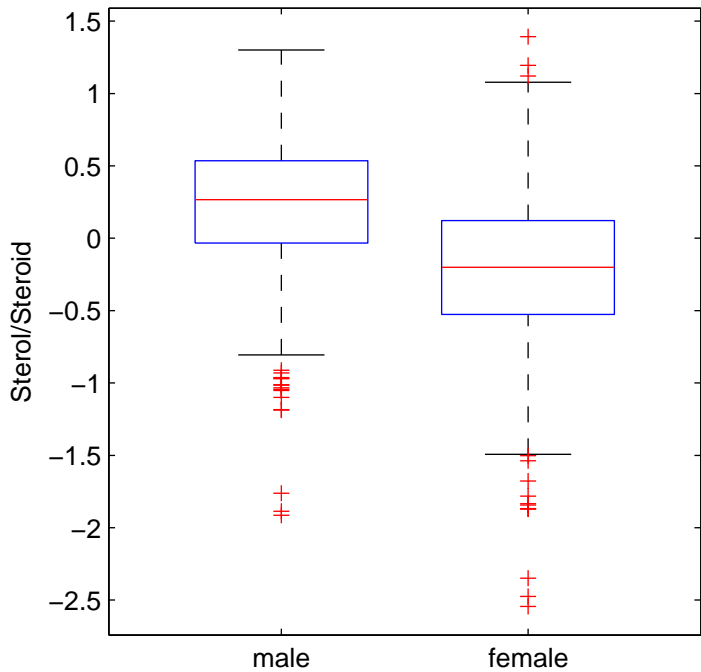



p-val: 2.22e-001

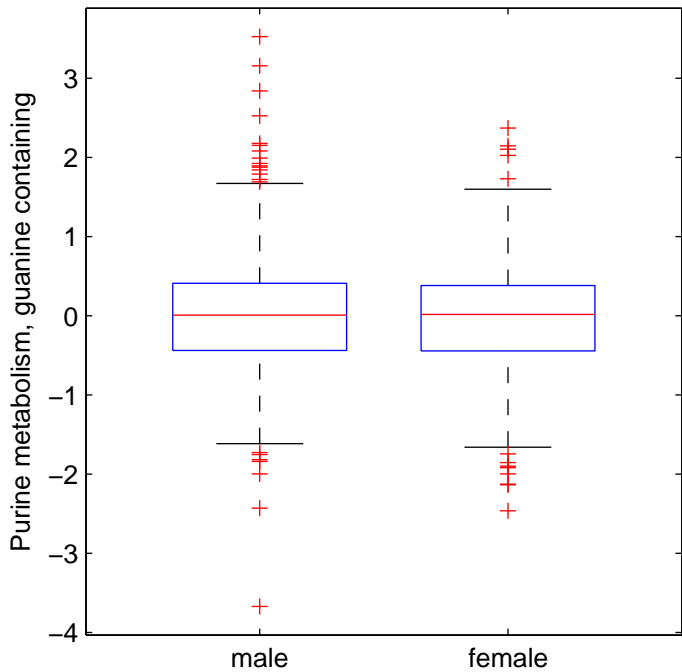

p-val: 1.69e-039

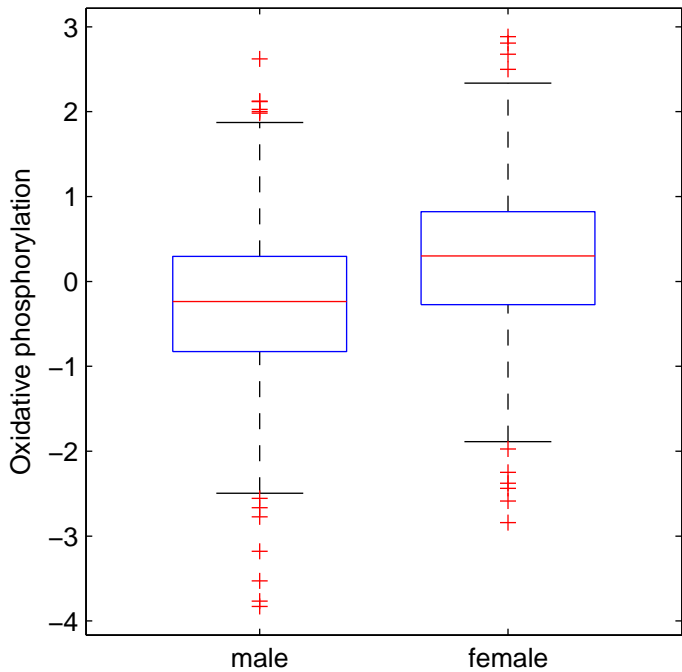

p-val: 2.60e-001

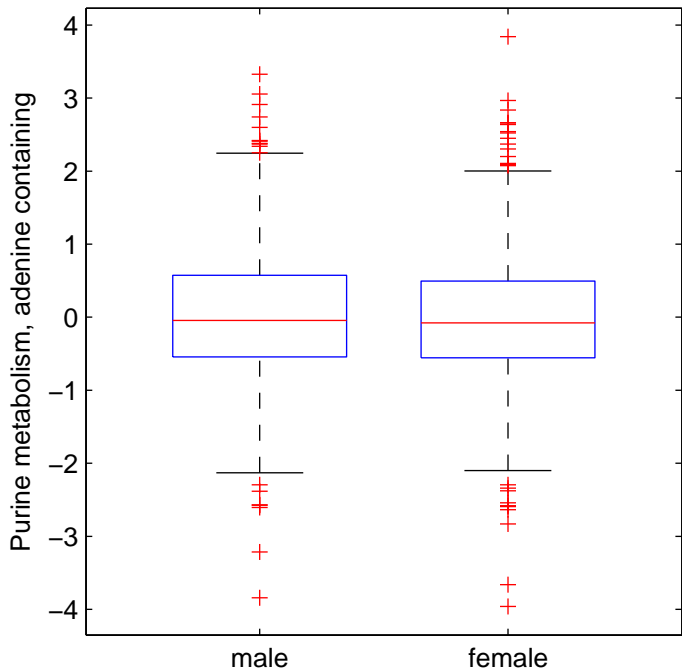

p-val: 3.13e-004

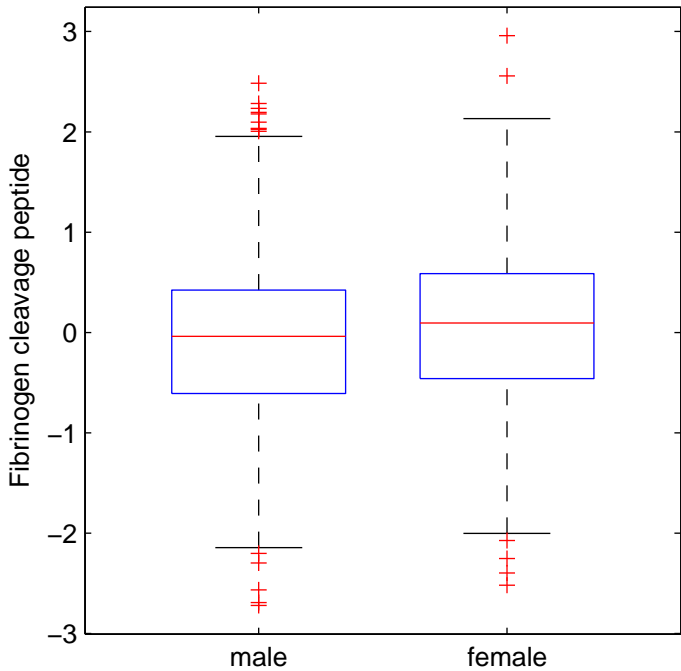

p-val: 7.48e-004

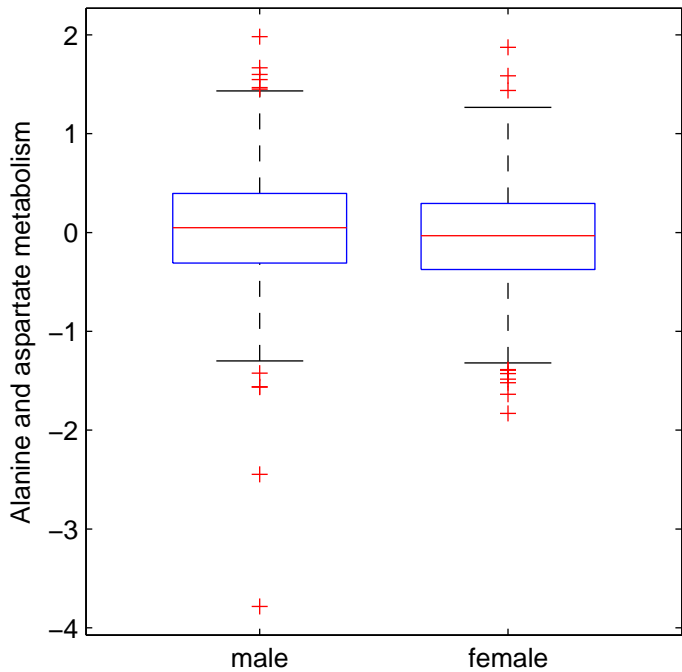

p-val: 5.85e-097

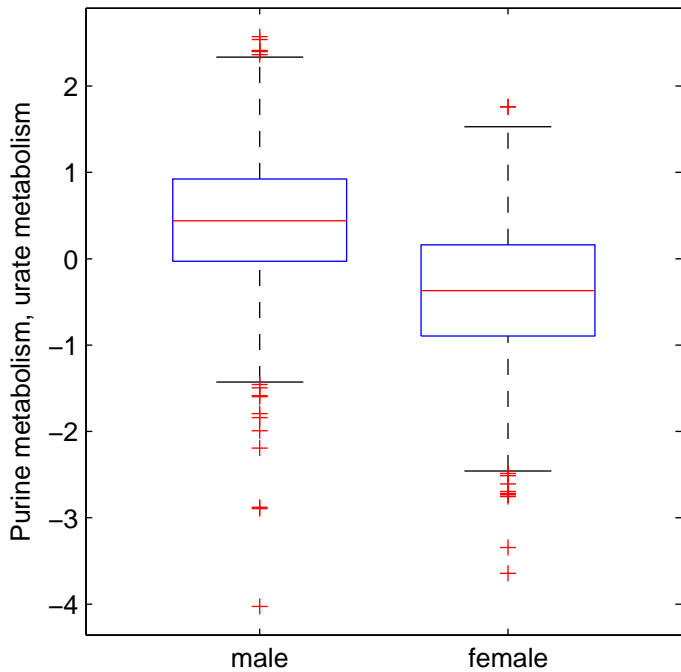

p-val: 2.72e-004

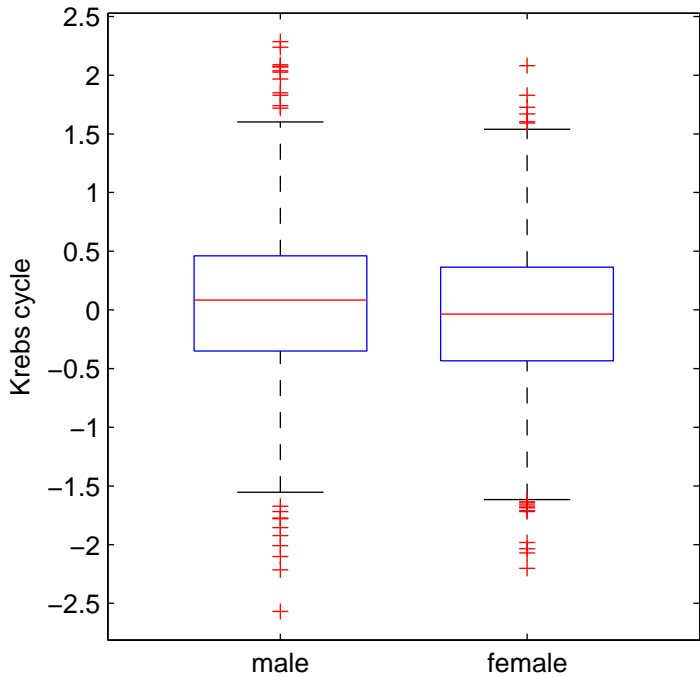

p-val: 5.91e-003

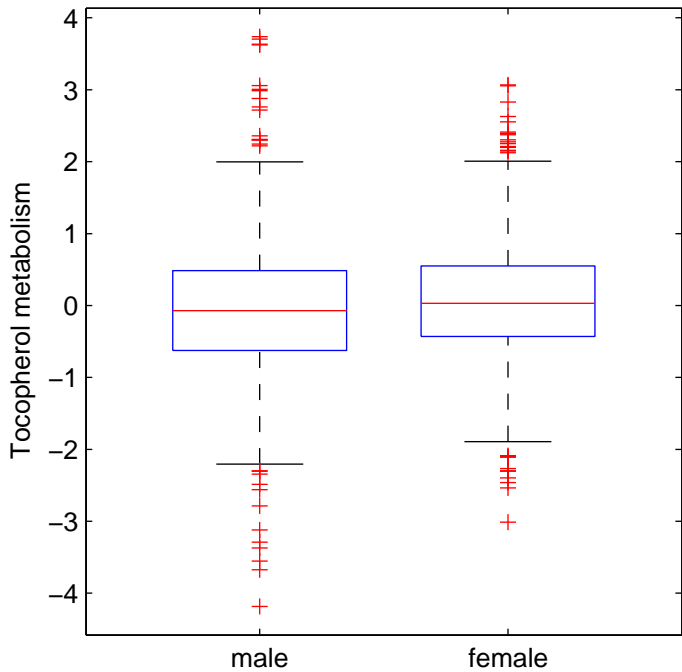



p-val: 1.13e-007

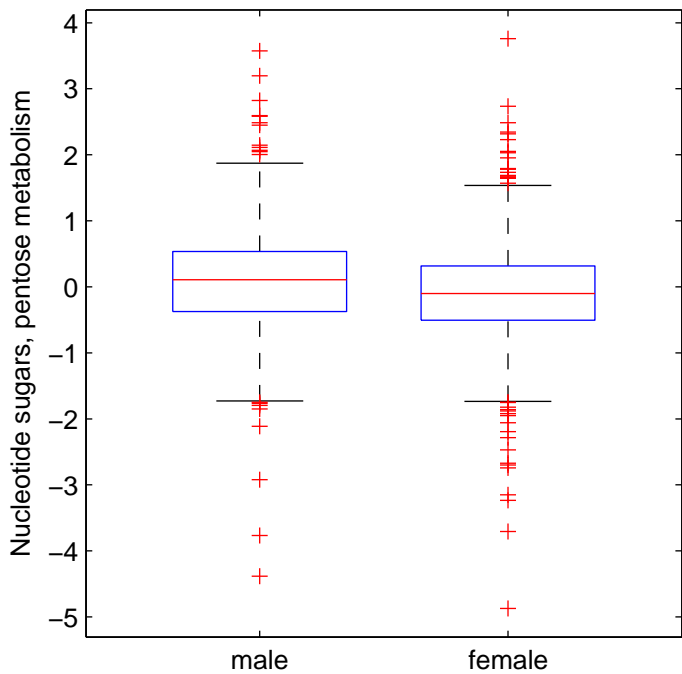

p-val: 2.72e-013

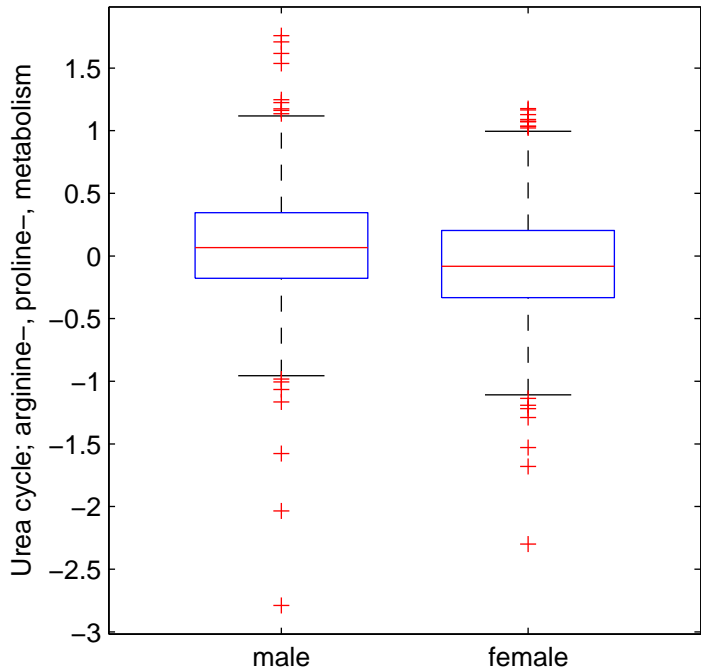

p-val: 6.02e-016

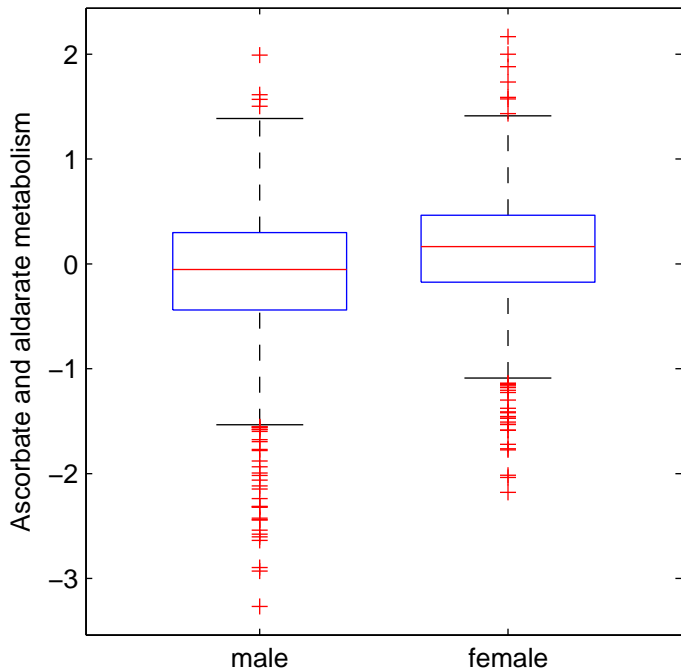

p-val: 2.53e-001

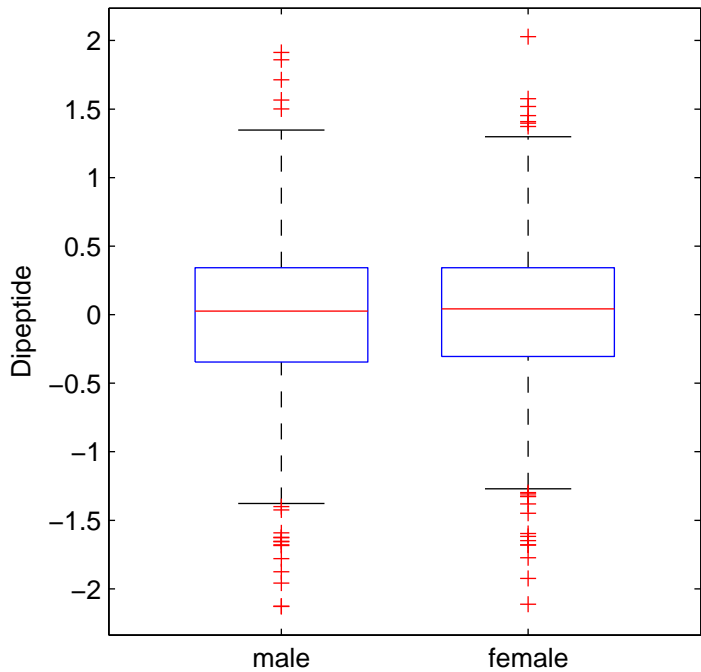

p-val: 1.01e-004

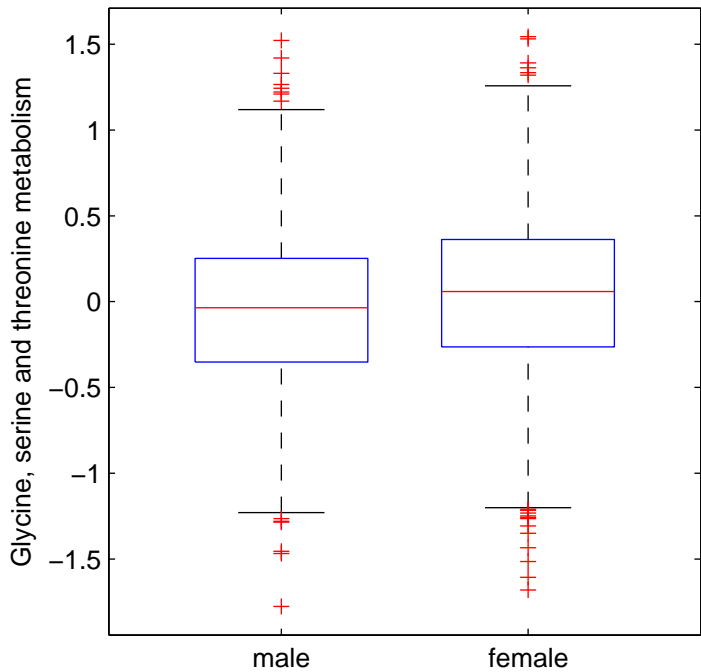

p-val: 2.56e-009

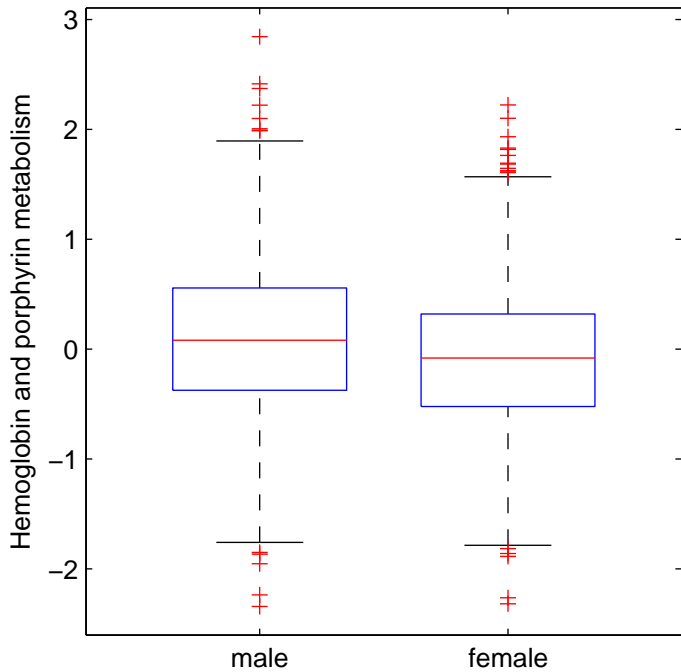

p-val: 1.52e-001

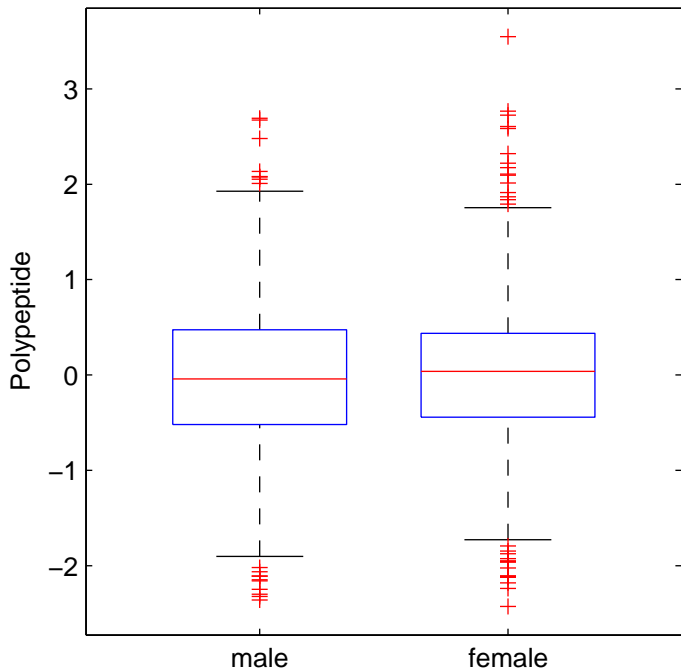

p-val: 4.69e-018

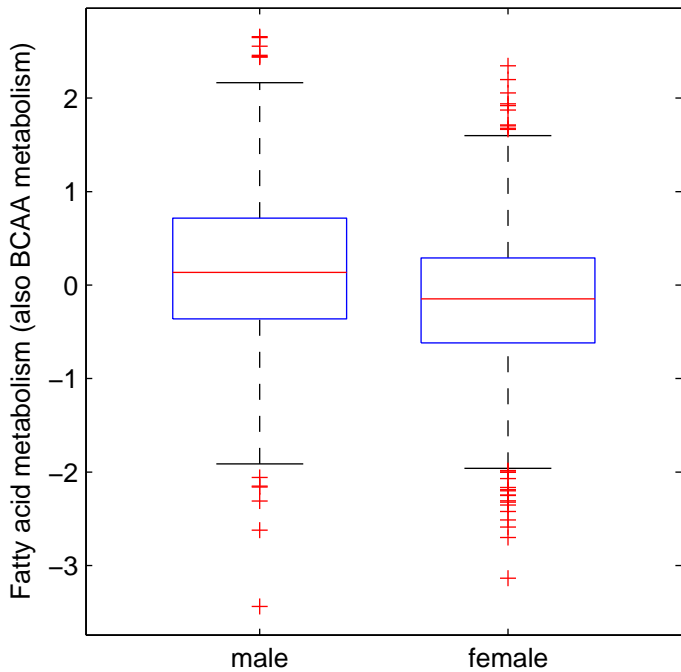



p-val: 1.51e-012

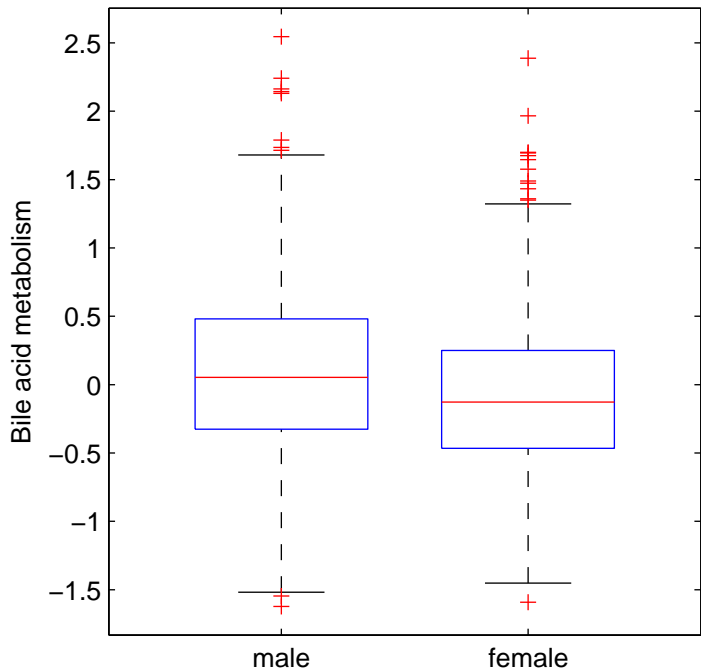

p-val: 3.26e-008

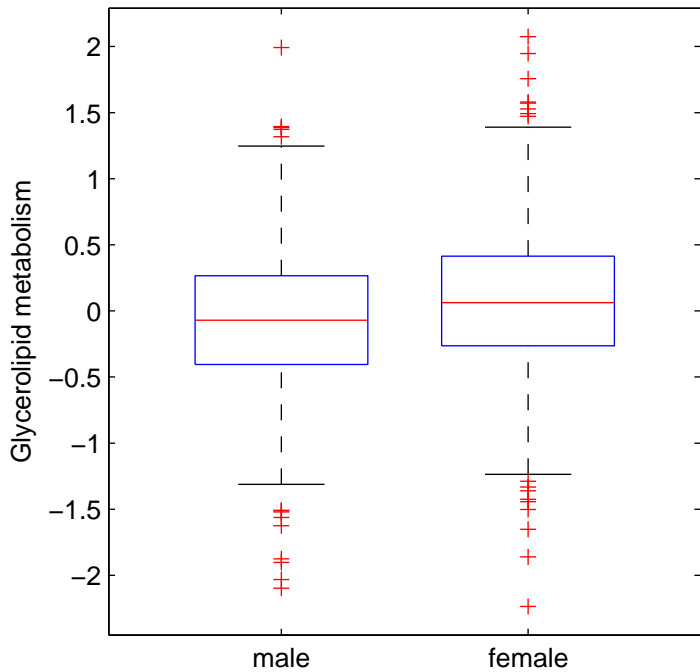

p-val: 1.86e-001

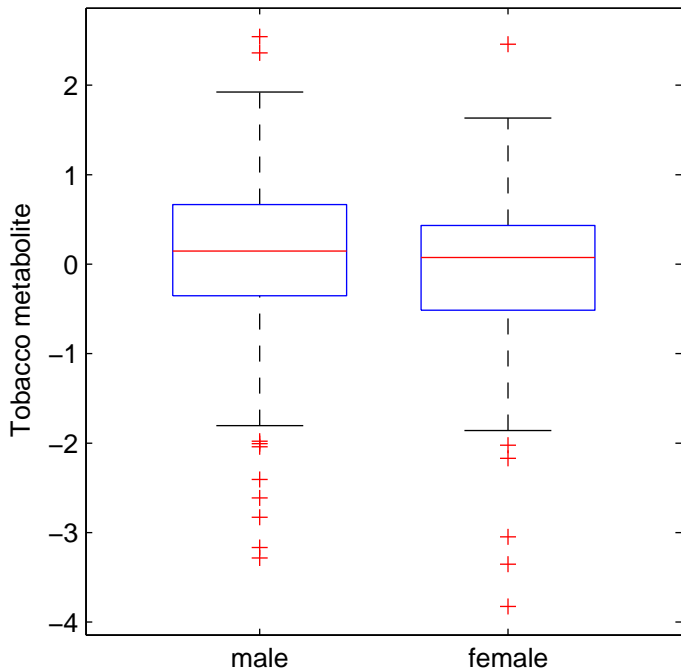

p-val: 2.35e-004

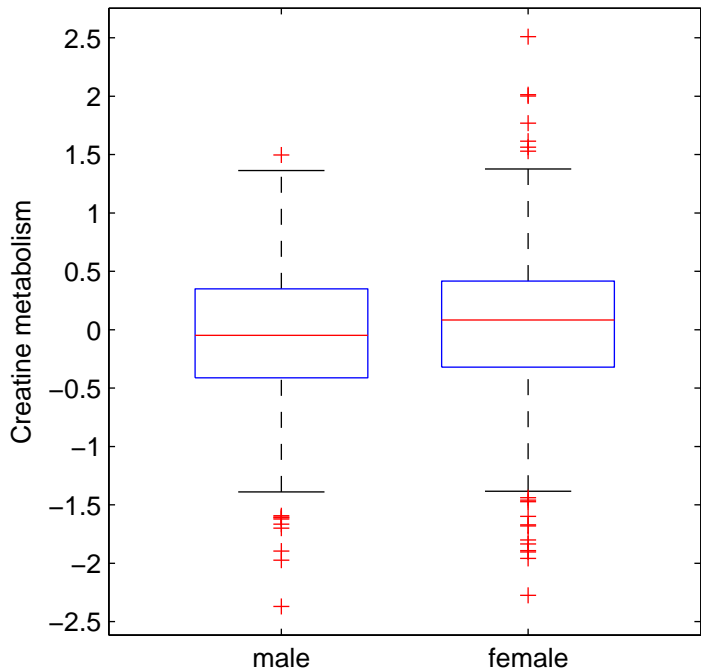

p-val: 4.84e-005

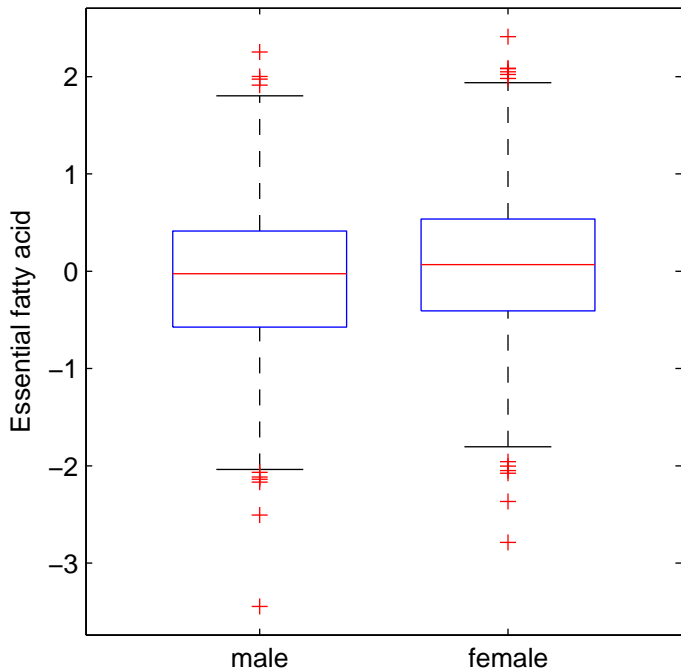

p-val: 1.83e-003

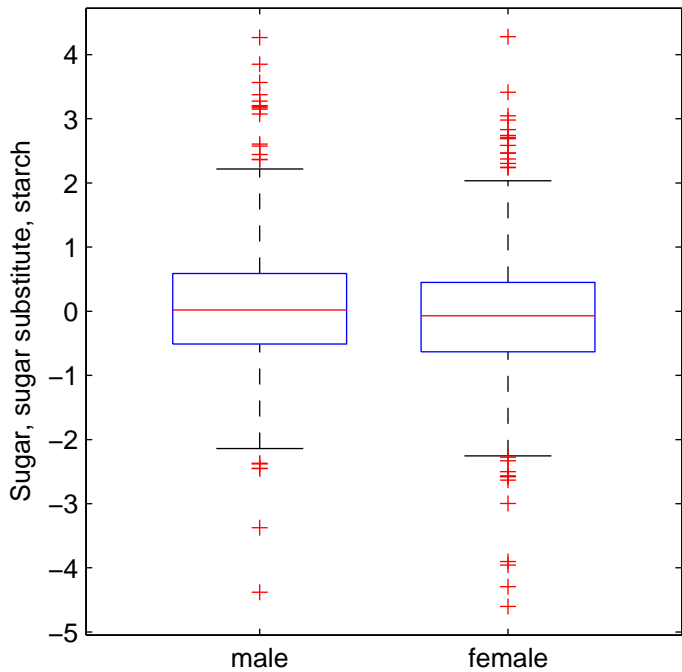

p-val: 3.48e-005

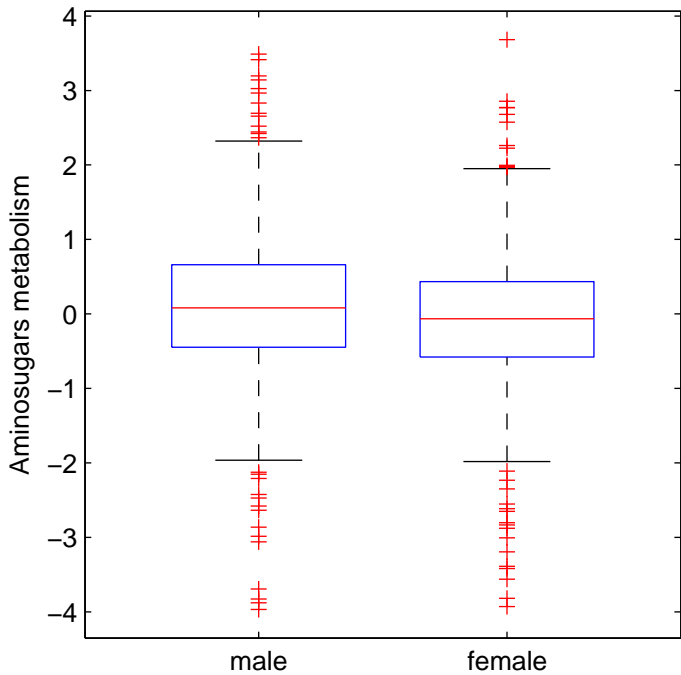

Fructose, mannose, galactose, starch, and sucrose metabolism

p-val: 6.31e-013

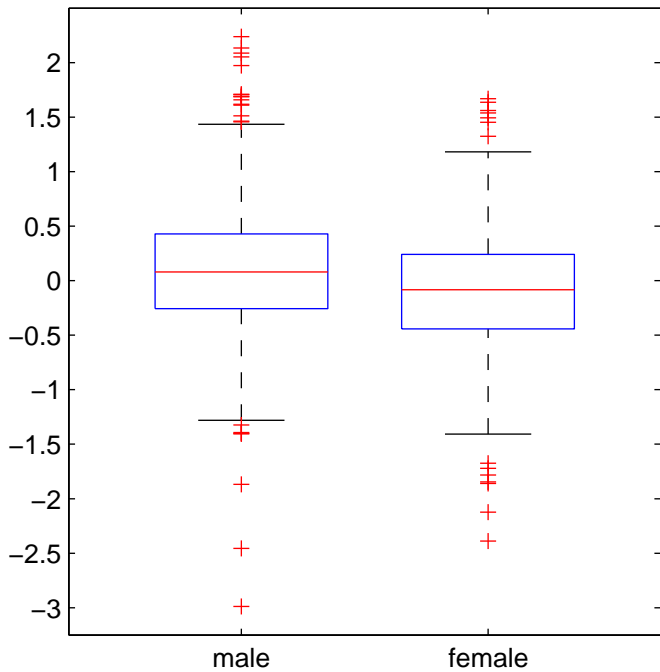



p-val: 9.34e-060

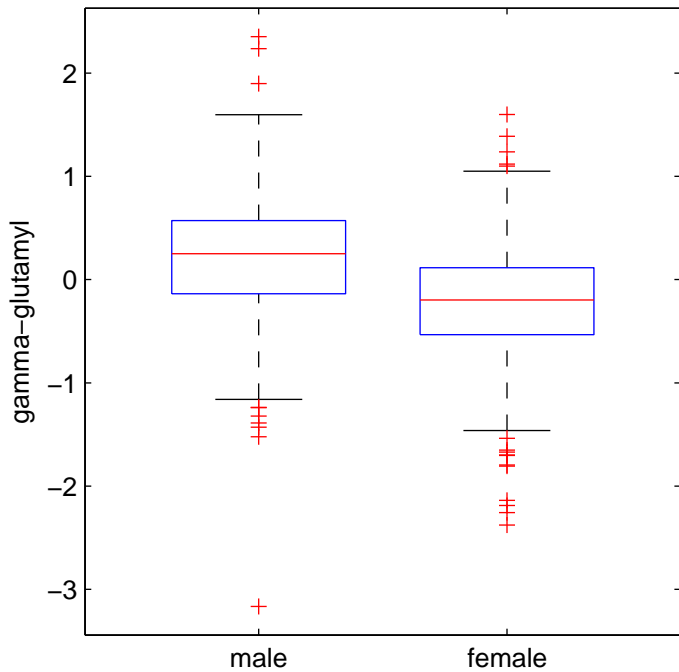

p-val: 1.02e-099

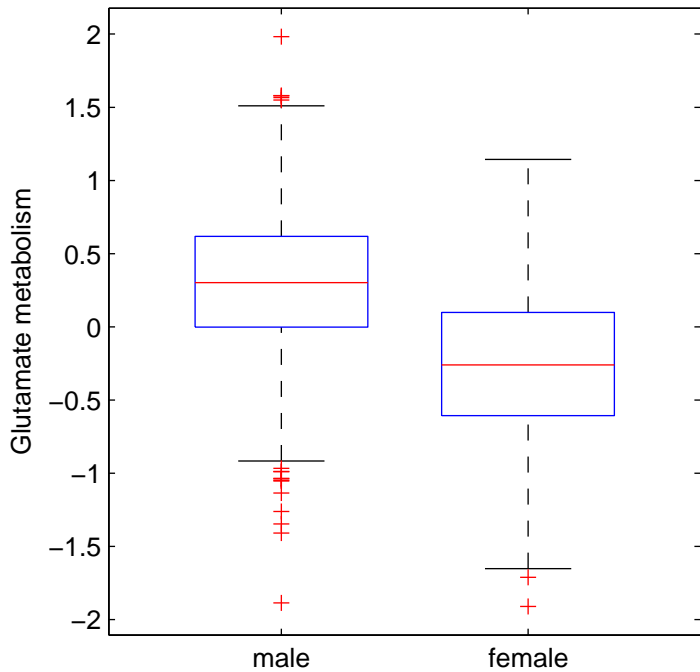

p-val: 2.77e-027

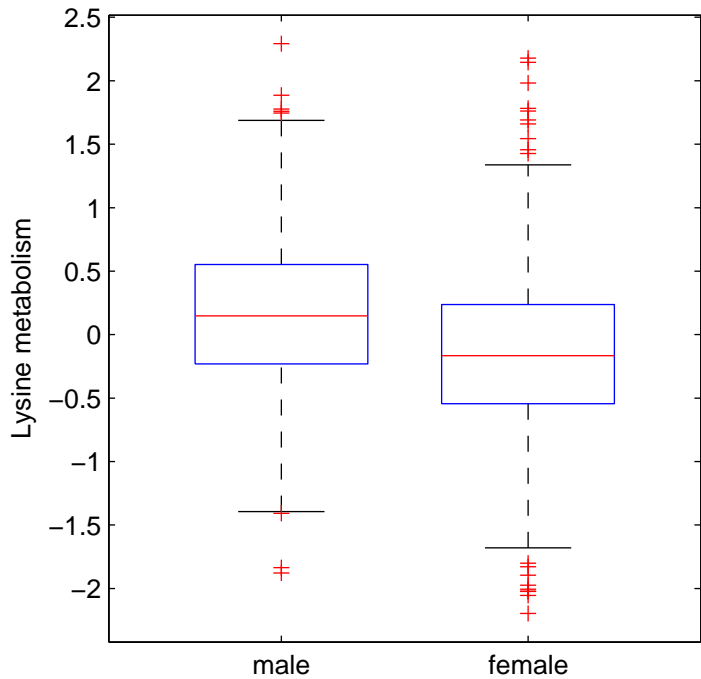

p-val: 2.24e-001

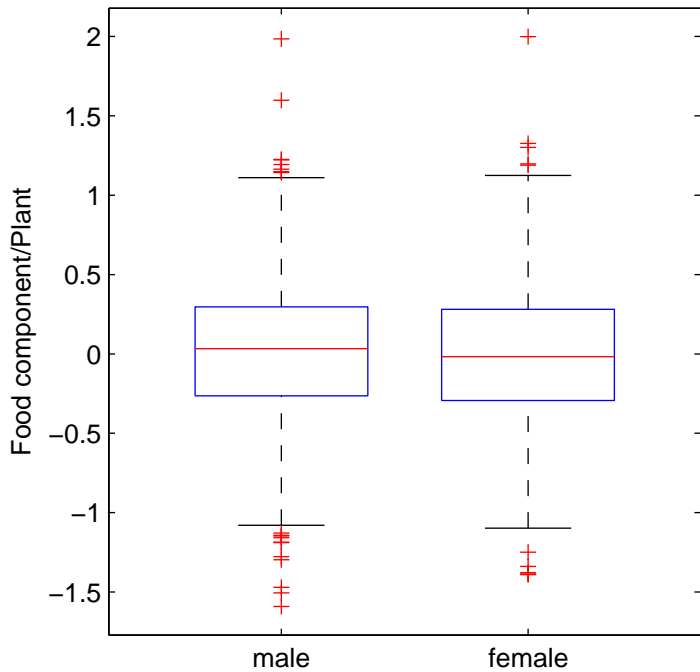

p-val: 1.36e-008

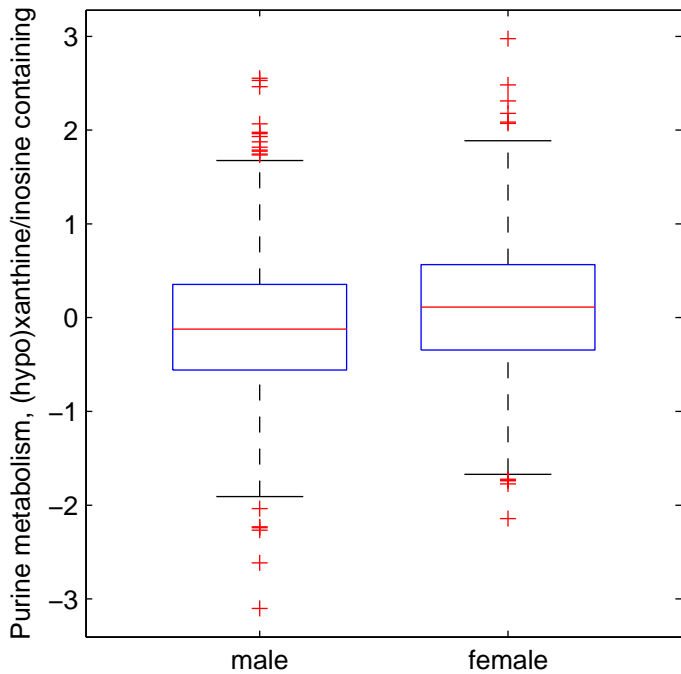

p-val: 5.36e-001

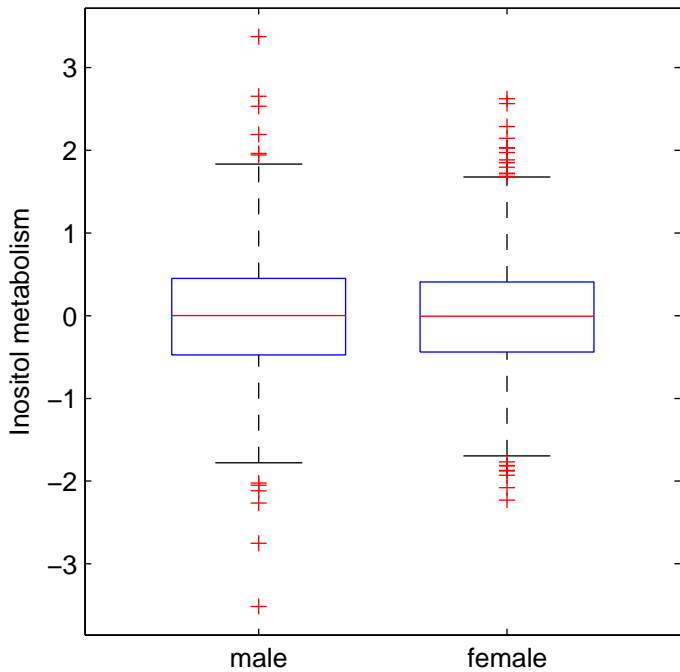

p-val: 1.25e-030

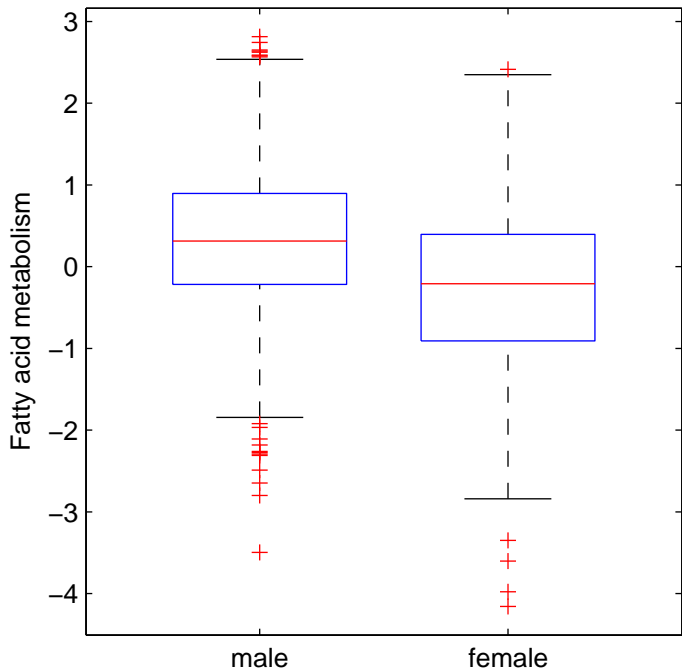

p-val: 8.14e-003

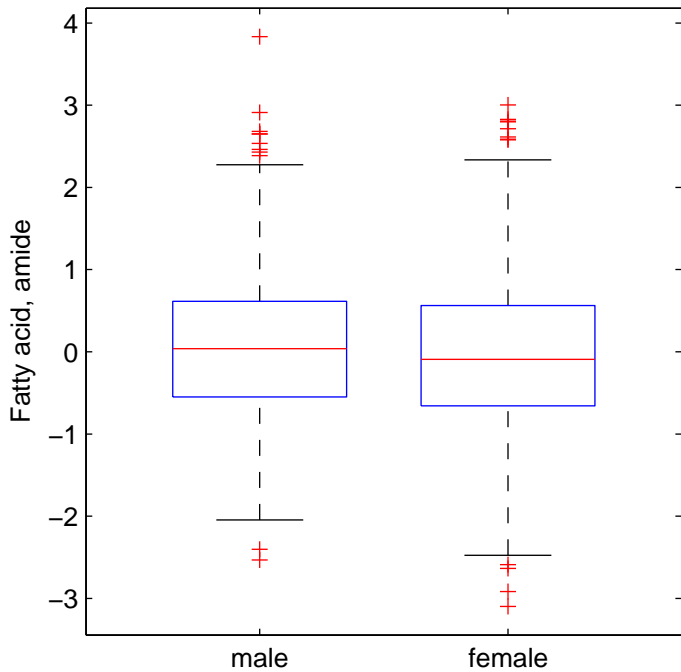



p-val: 7.71e-001

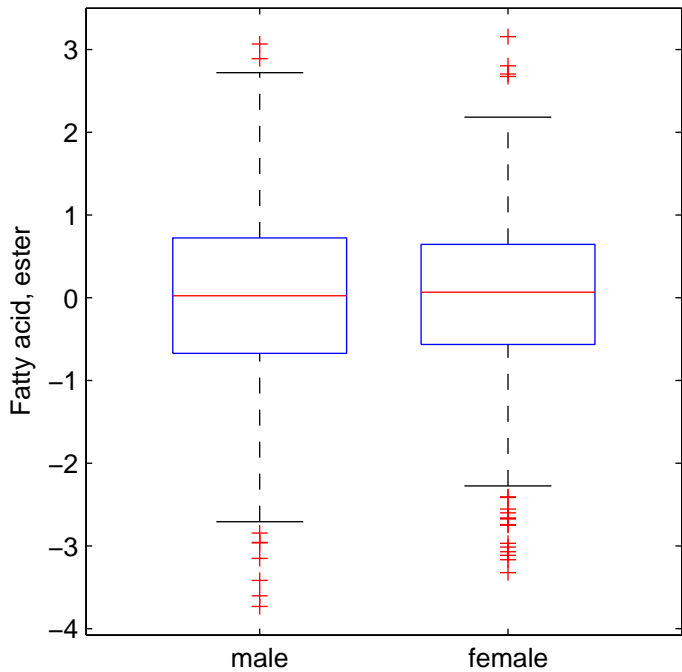

p-val: 9.64e-001

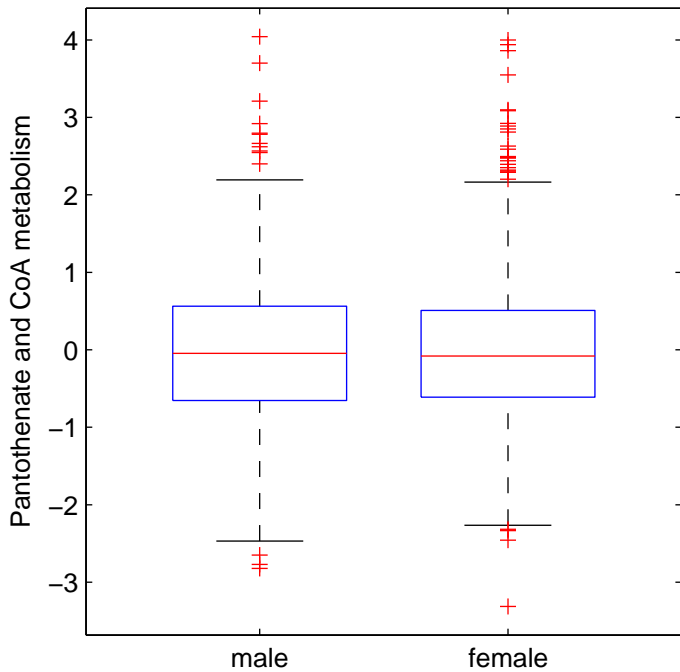

p-val: 9.33e-002

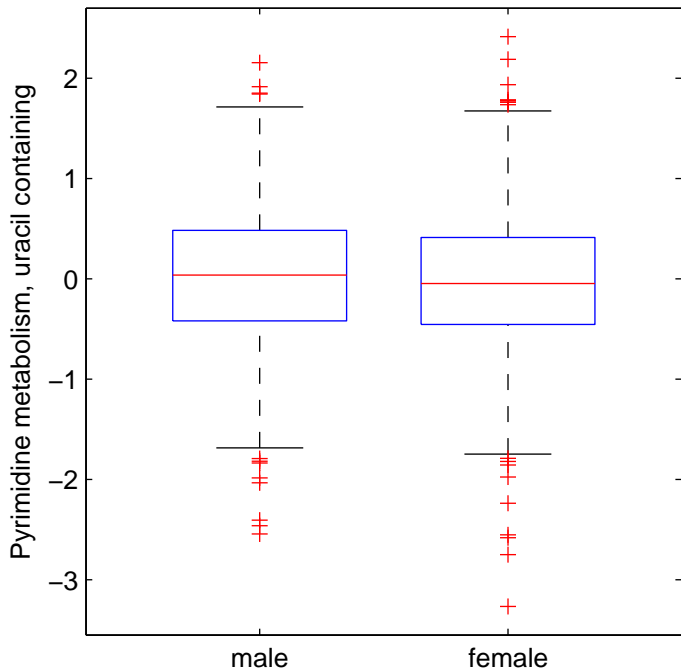

p-val: 7.09e-013

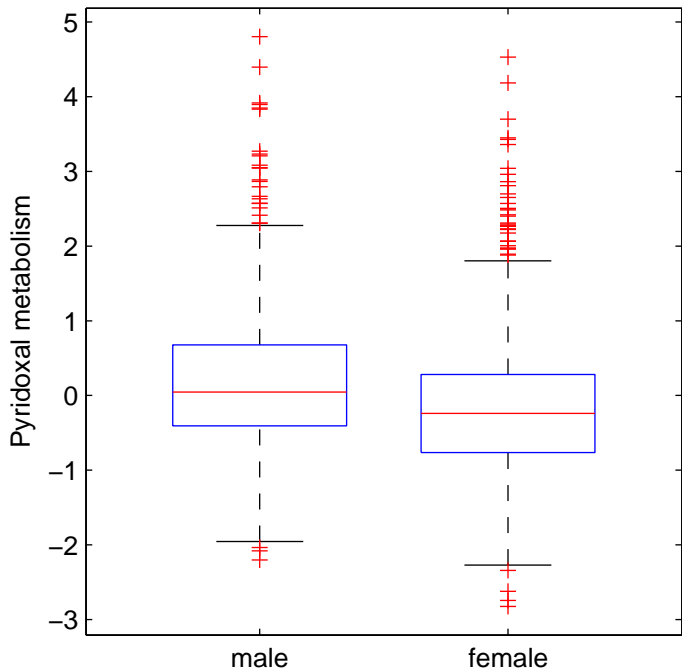

p-val: 1.54e-001

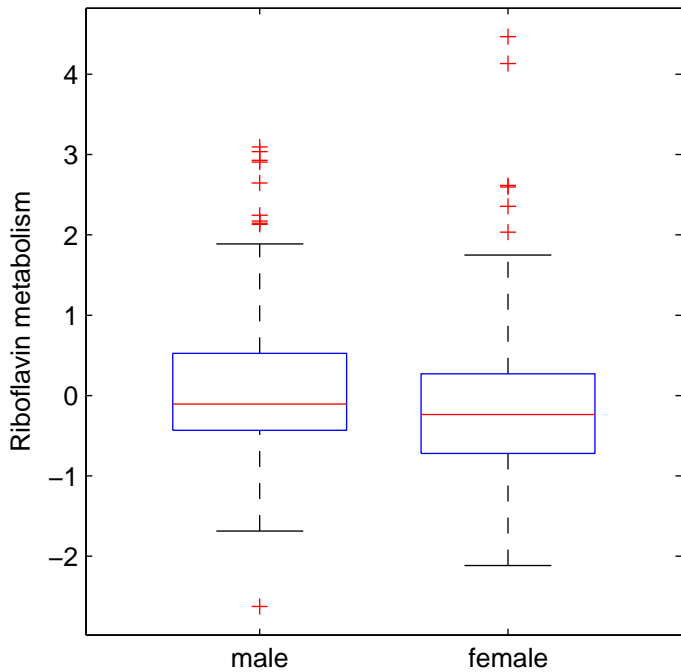

p-val: 9.70e-001

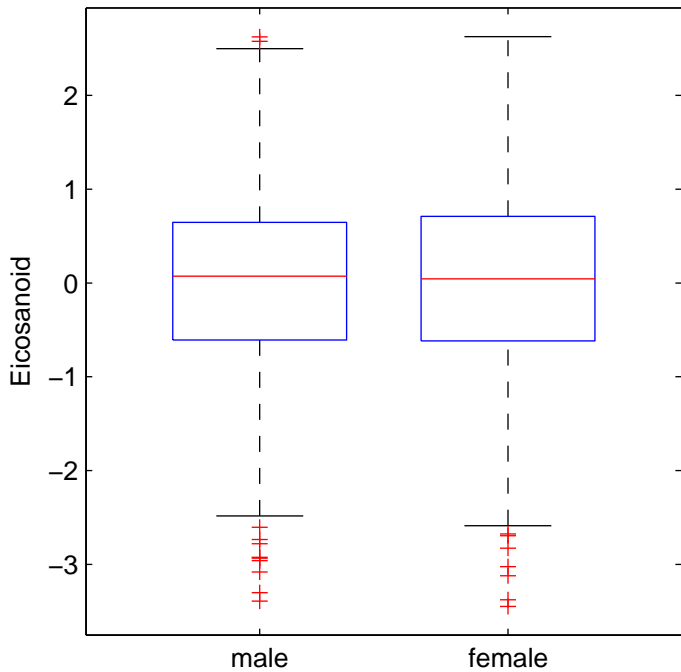

p-val: 8.88e-002

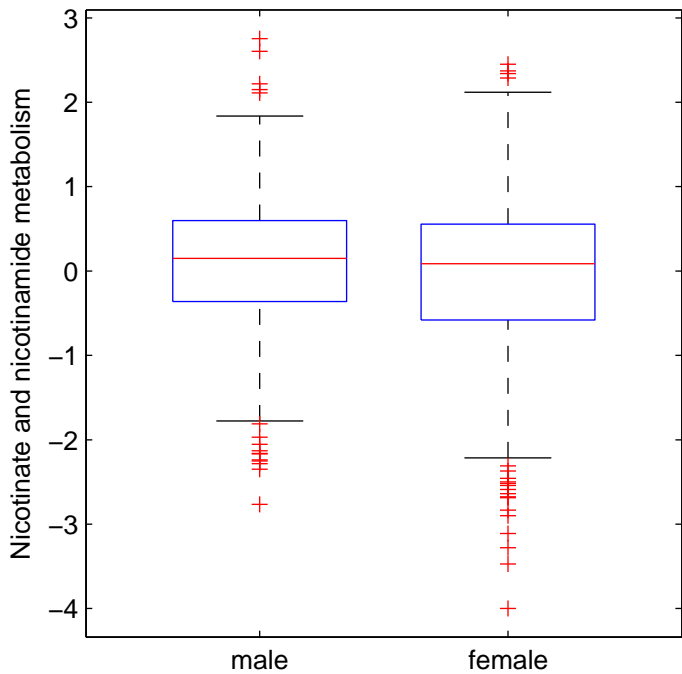

p-val: 3.81e-005

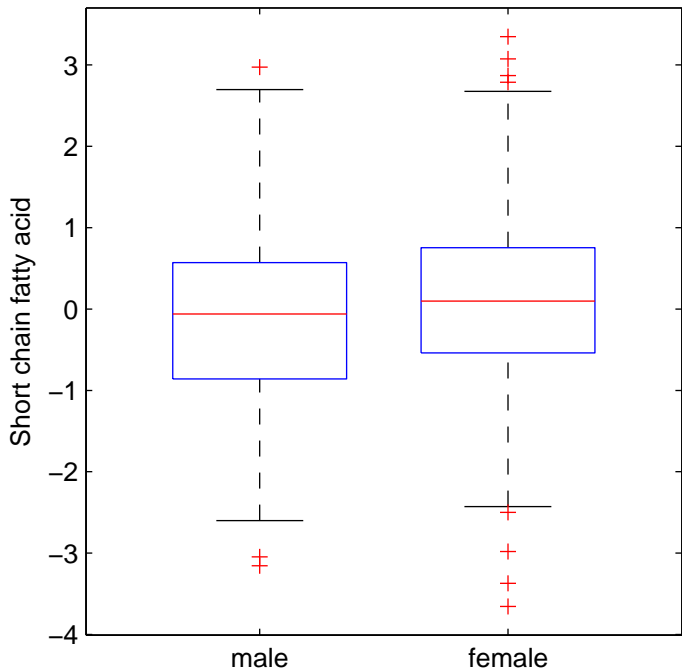



p-val: 3.18e-002

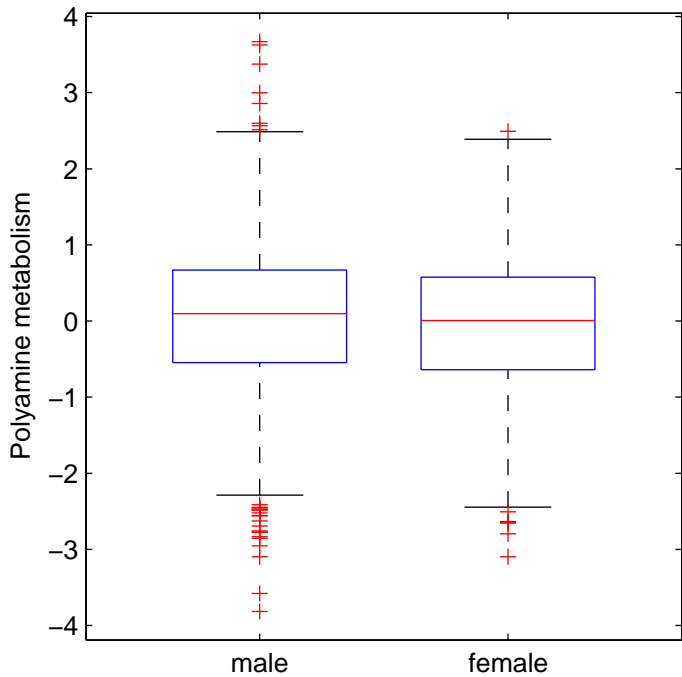

p-val: 6.76e-023

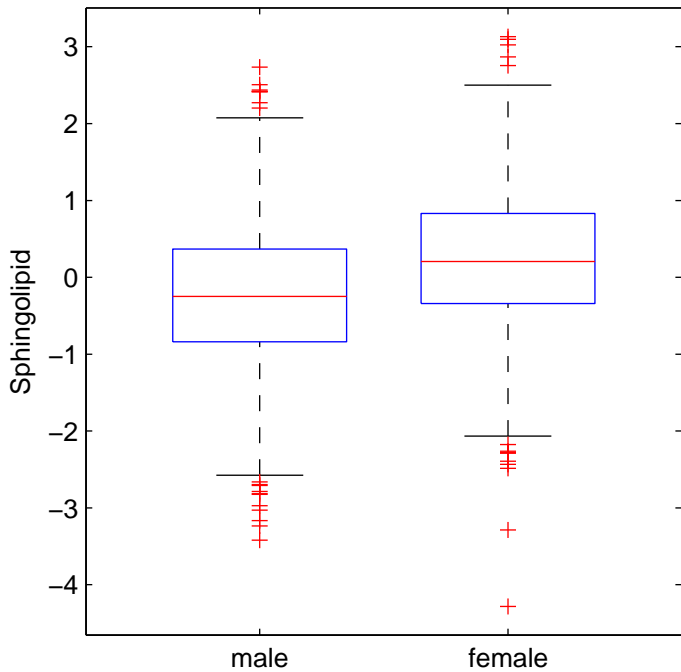

p-val: 2.27e-029

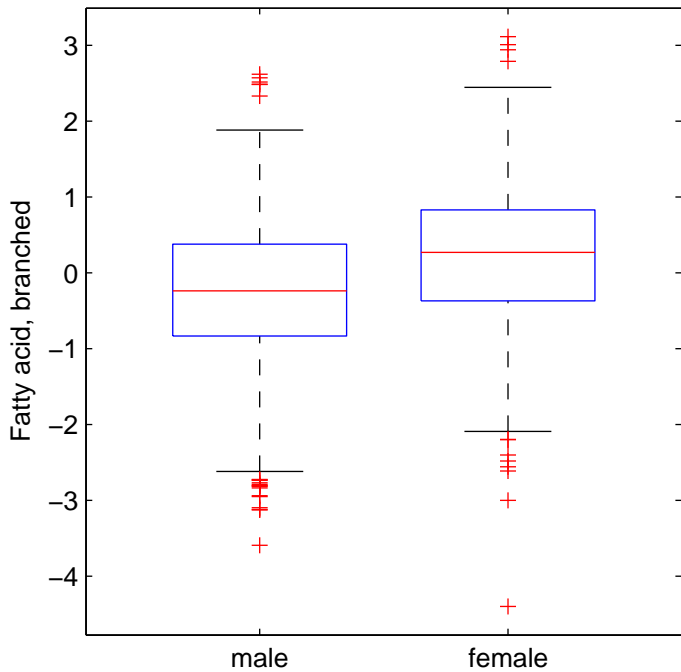

p-val: 8.40e-002

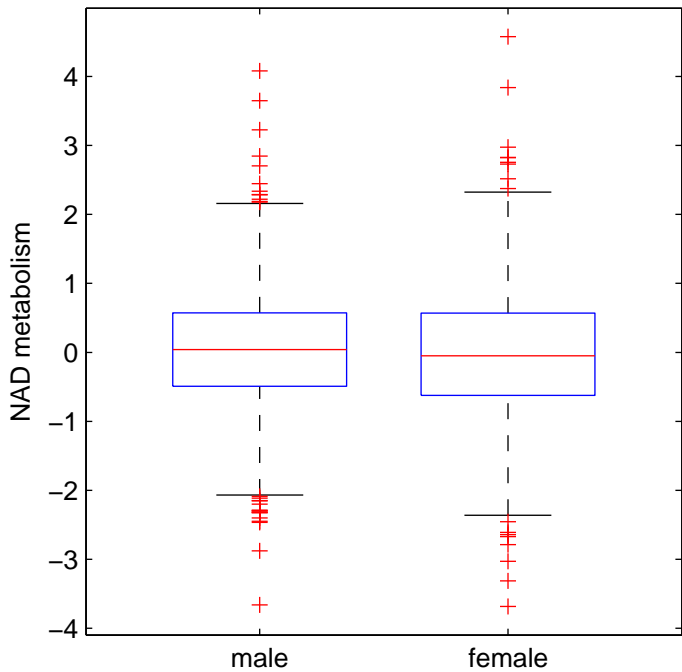

## SHIP metabolite boxplots

p-val: 1.87e-020

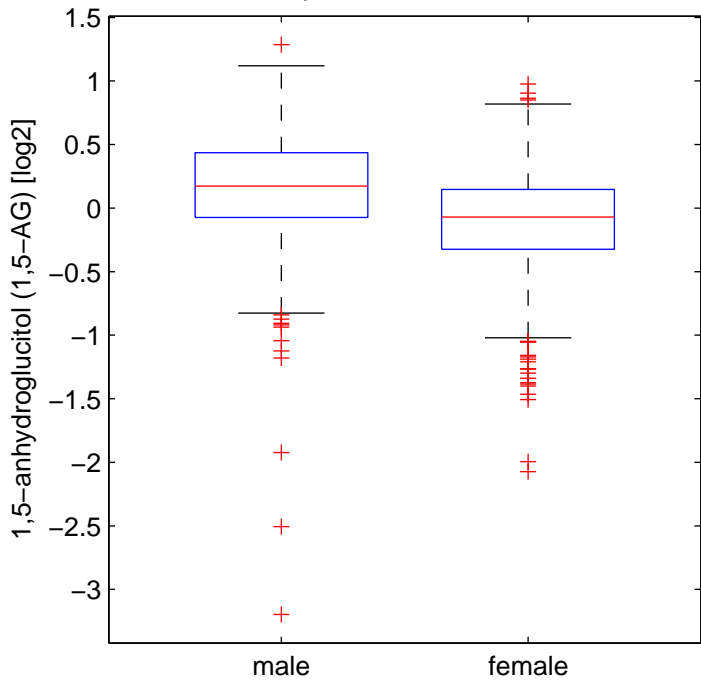

p-val: 3.21e-002

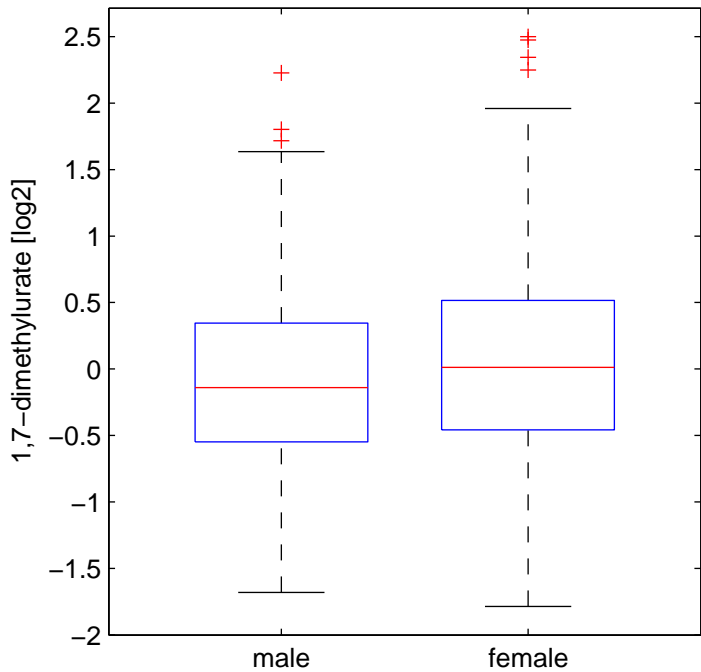

p-val: 6.96e-016

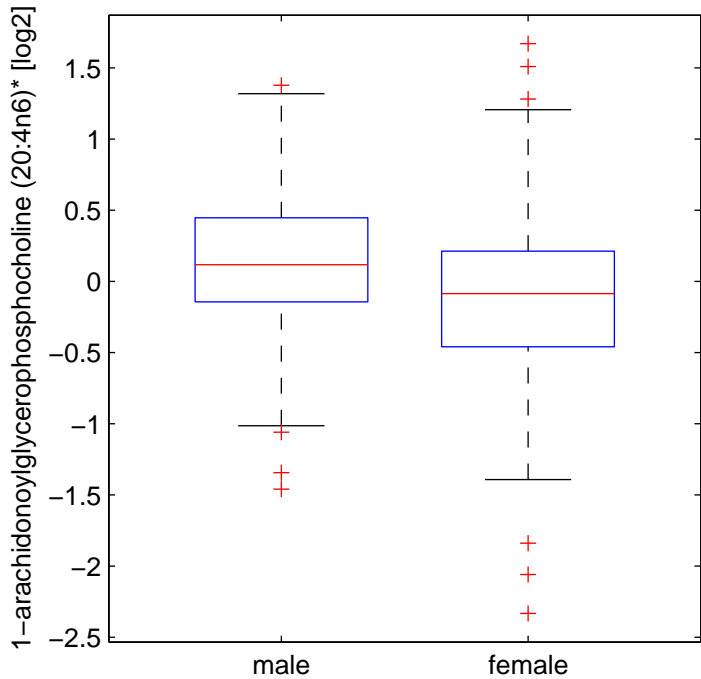



p-val: 1.17e-002

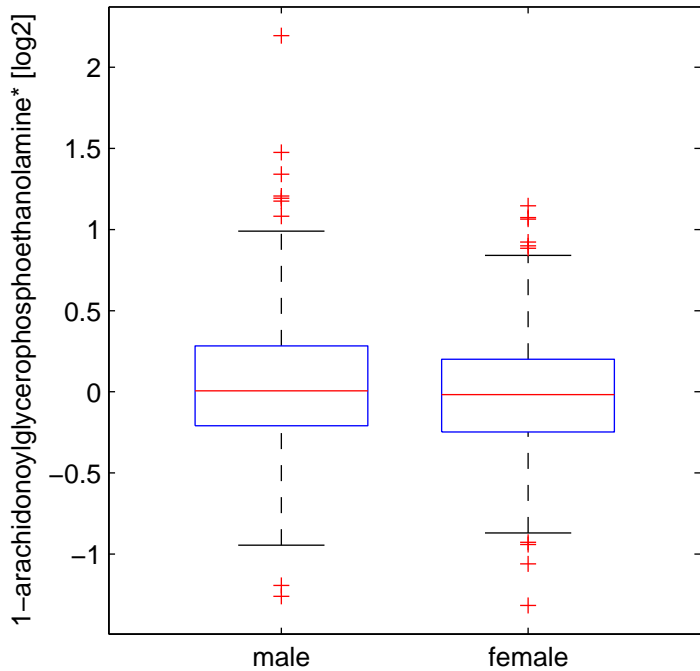

p-val: 2.33e-005

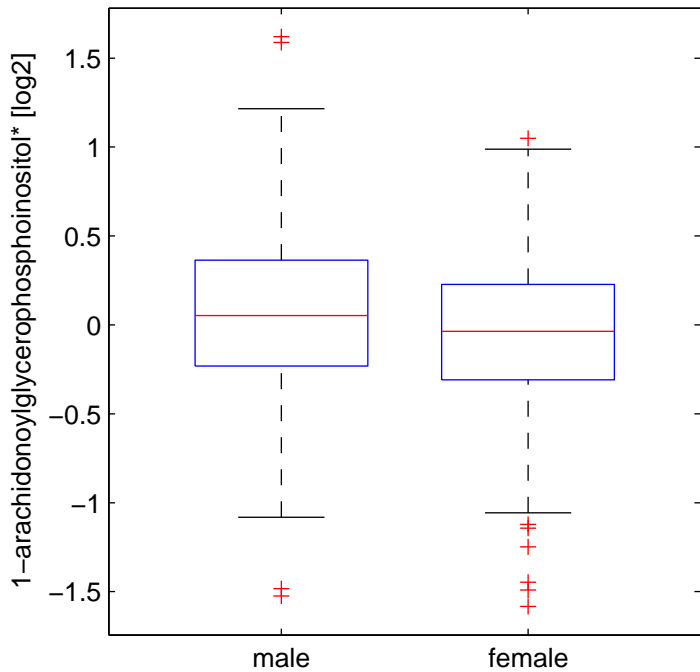

p-val: 5.11e-009

1-dihomo-linoleoylglycerophosphocholine (20:2n6)\* [log2]

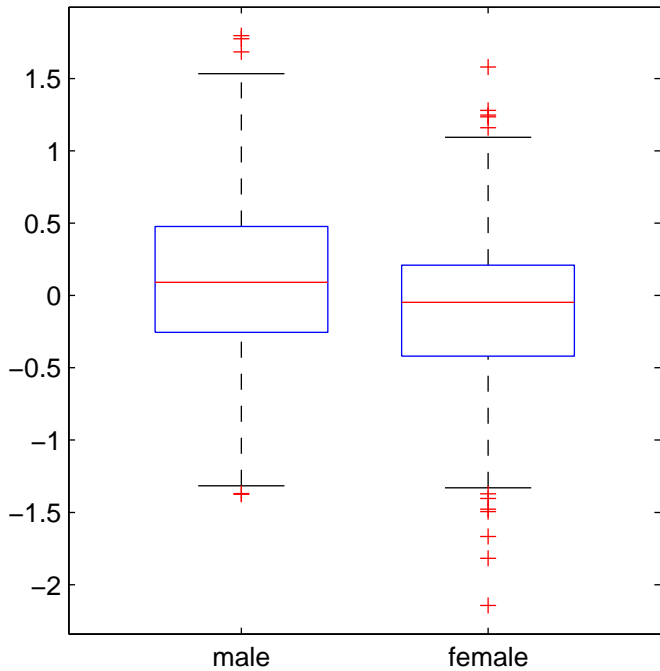

1-docosahexaenoylglycerophosphocholine (22:6n3)\* [log2]

p-val: 2.29e-007

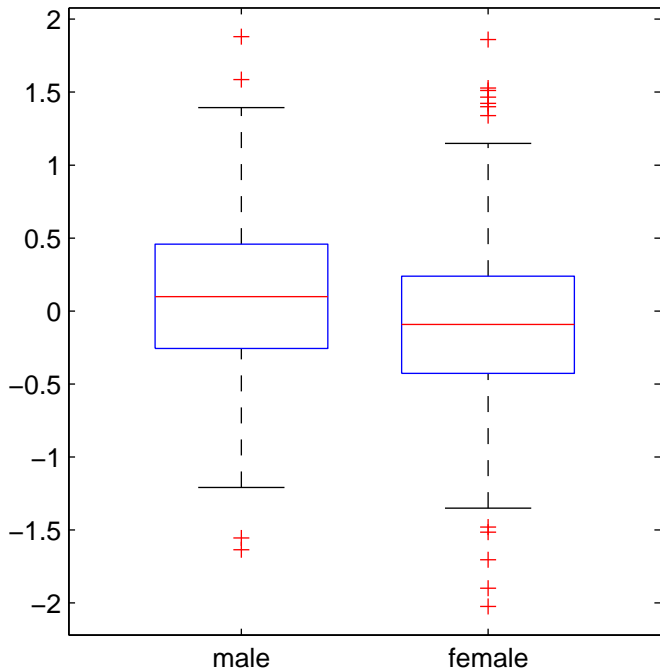

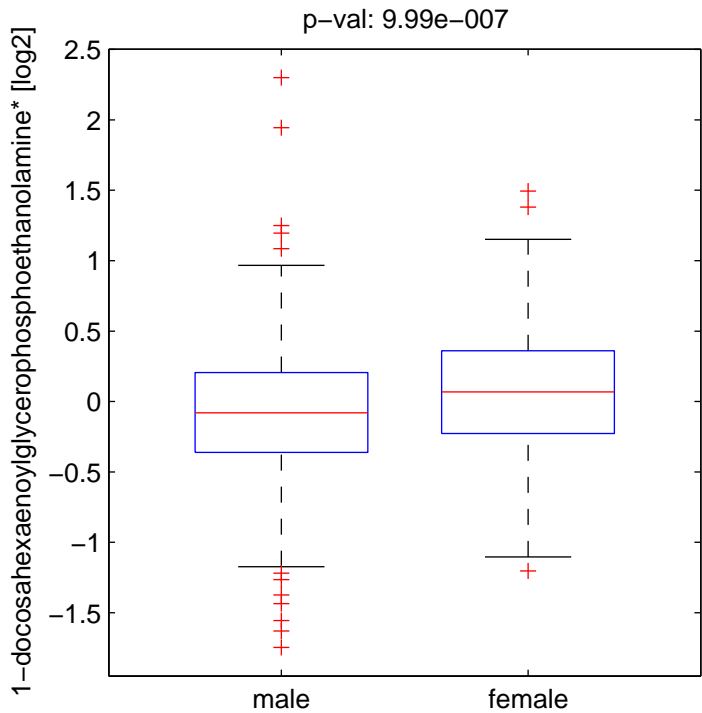

1-docosapentaenoylglycerophosphocholine (22:5n3)\* [log2]

p-val: 2.85e-014

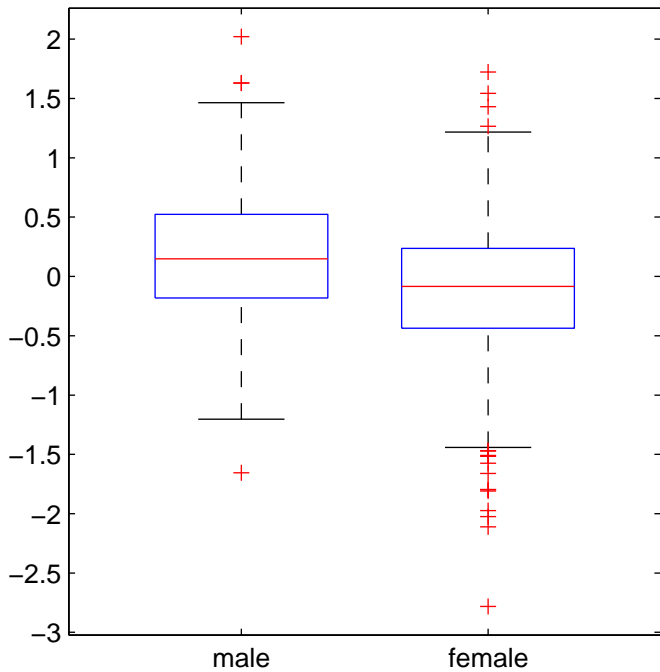

1-eicosapentaenylglycerophosphocholine (20:5n3)\* [log2]

p-val: 1.12e-017

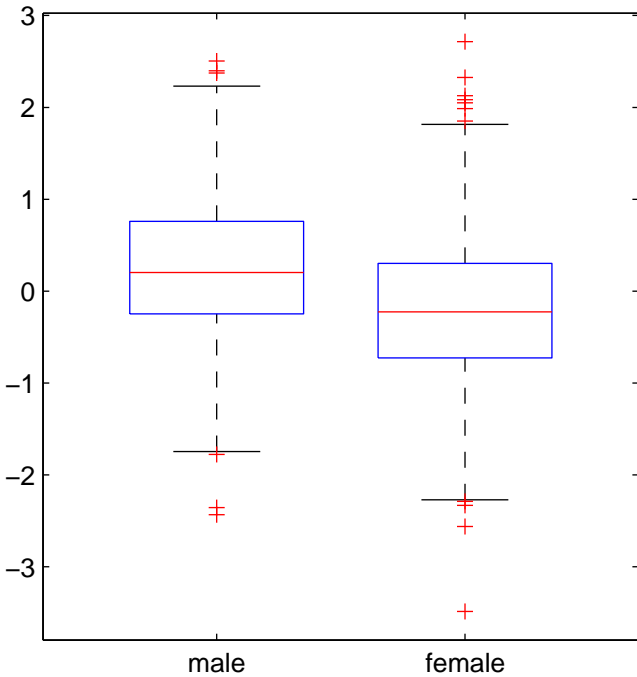

p-val: 8.36e-003

1-eicosapentaenoylglycerophosphoethanolamine\* [log2]

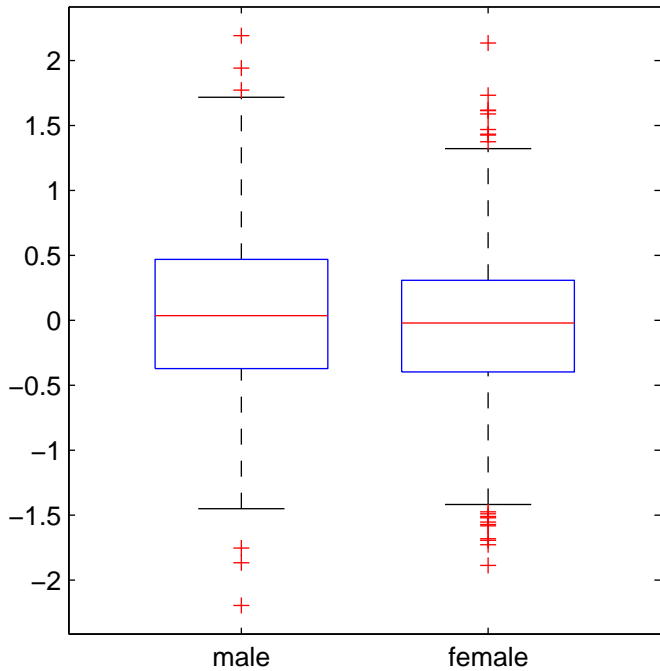



p-val: 2.33e-010

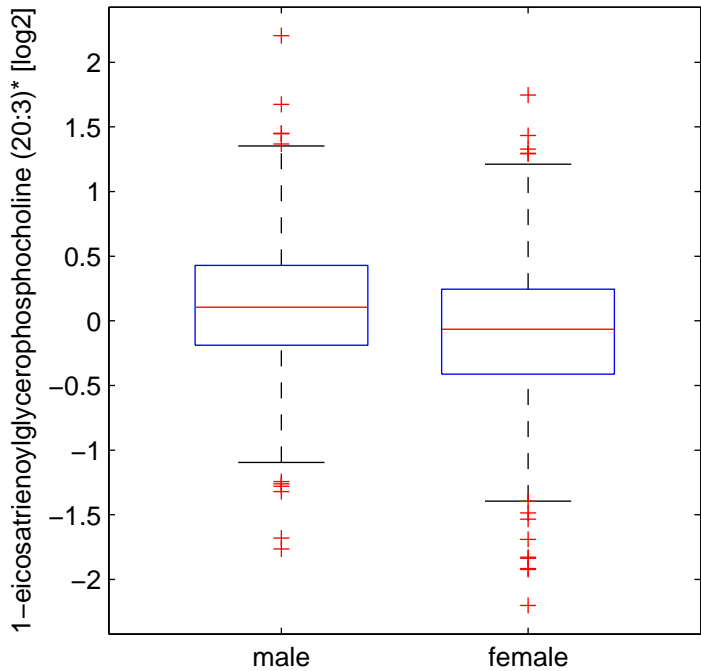

p-val: 9.72e-001

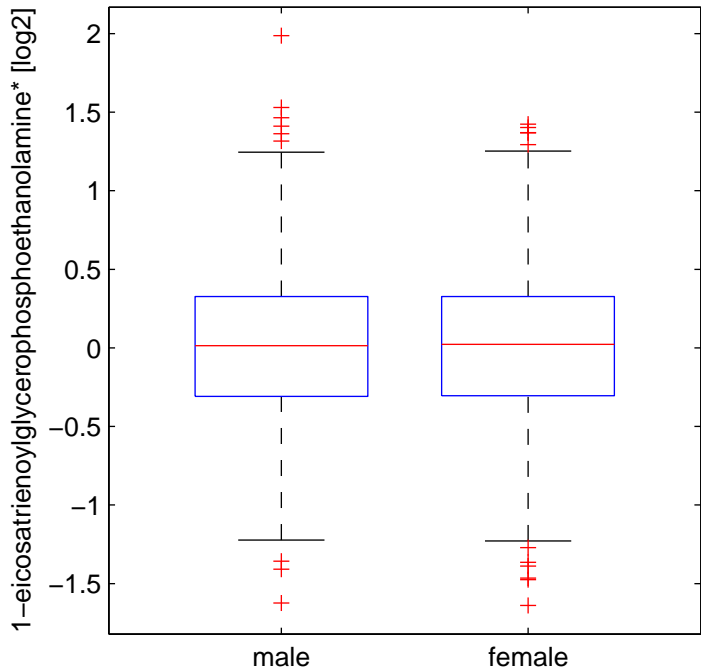

p-val: 1.36e-005

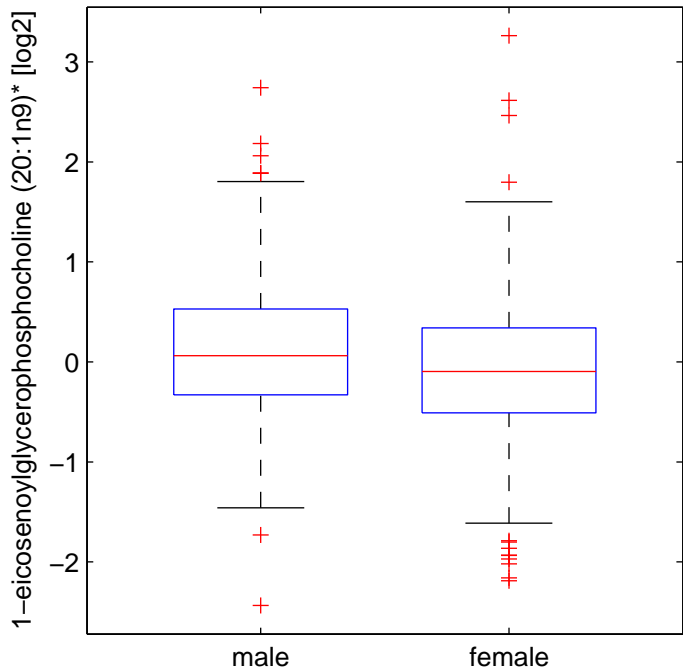

p-val: 9.76e-015

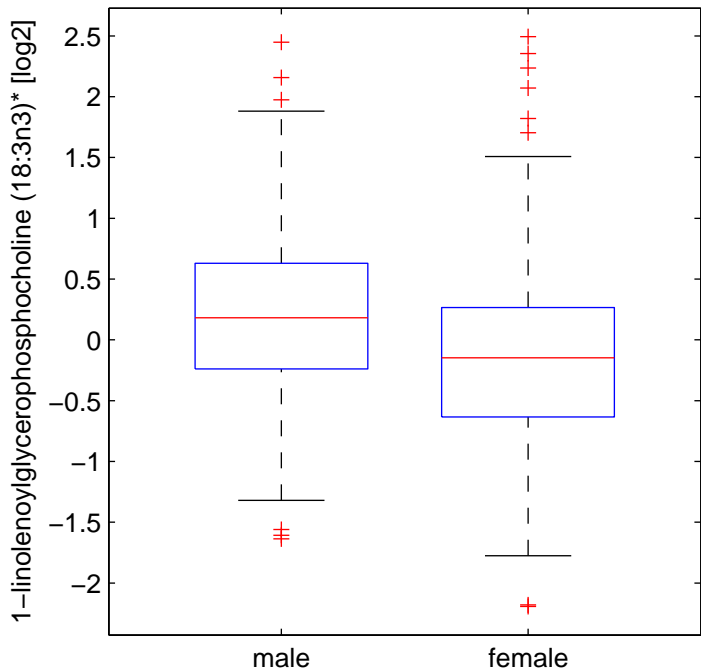

p-val: 1.50e-017

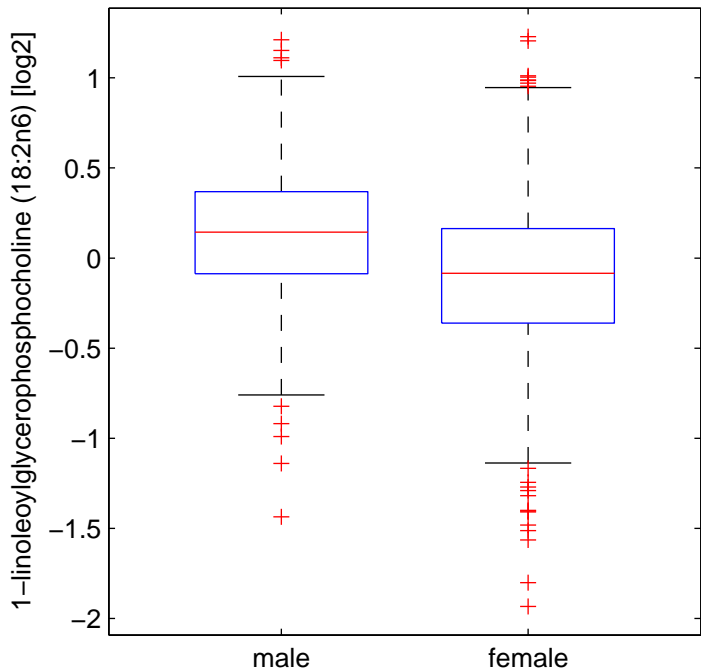

p-val: 2.26e-004

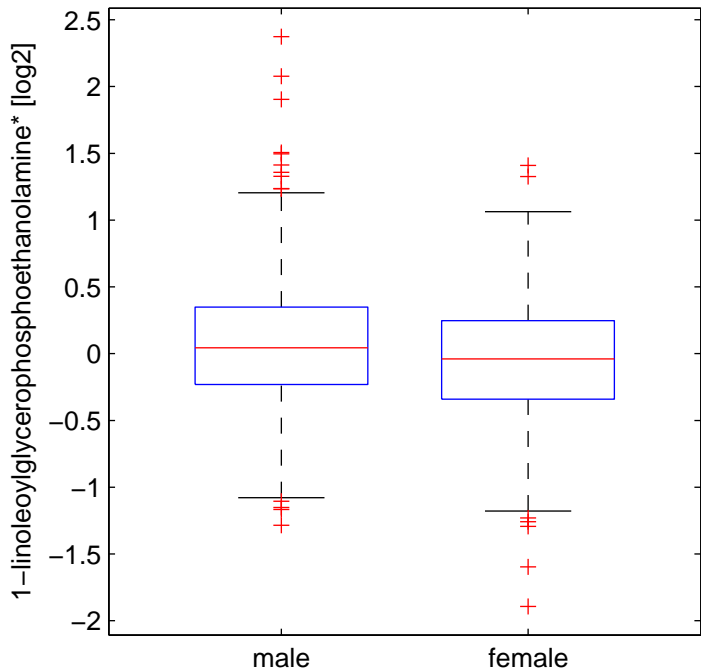

p-val: 1.46e-005

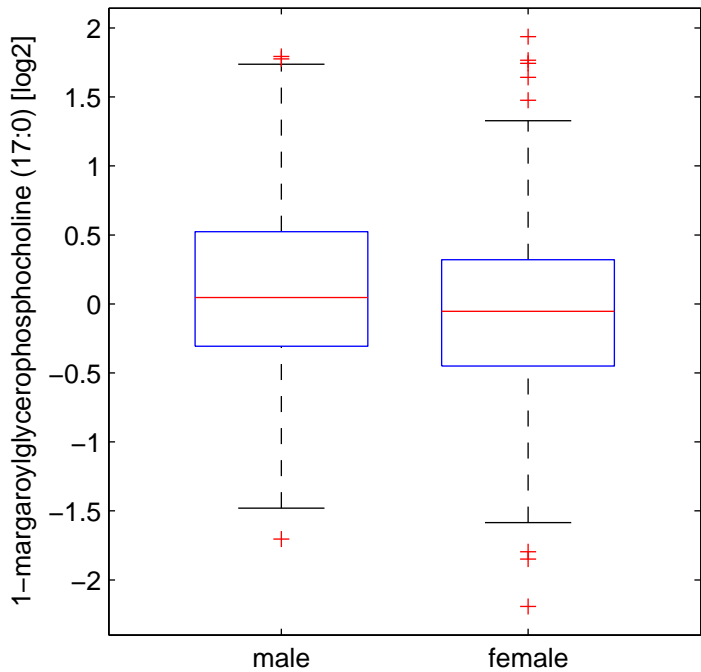

p-val: 1.60e-001

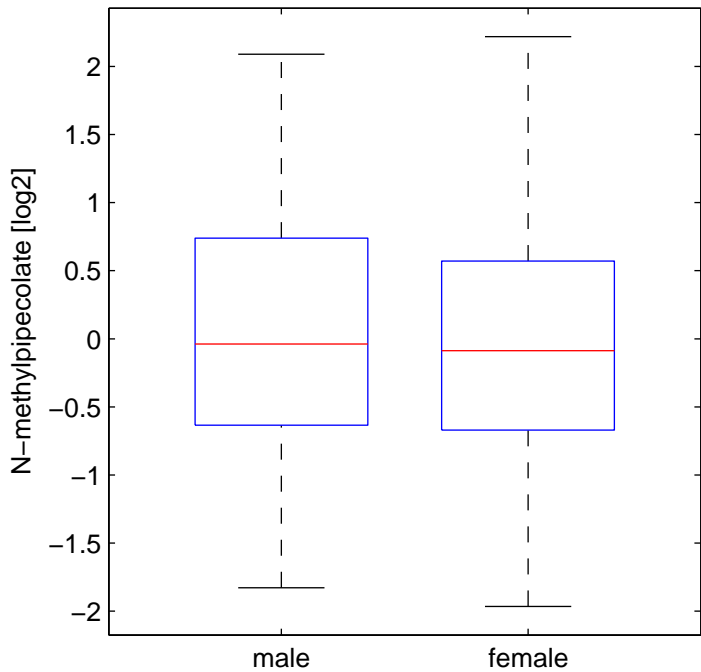



p-val: 1.87e-003

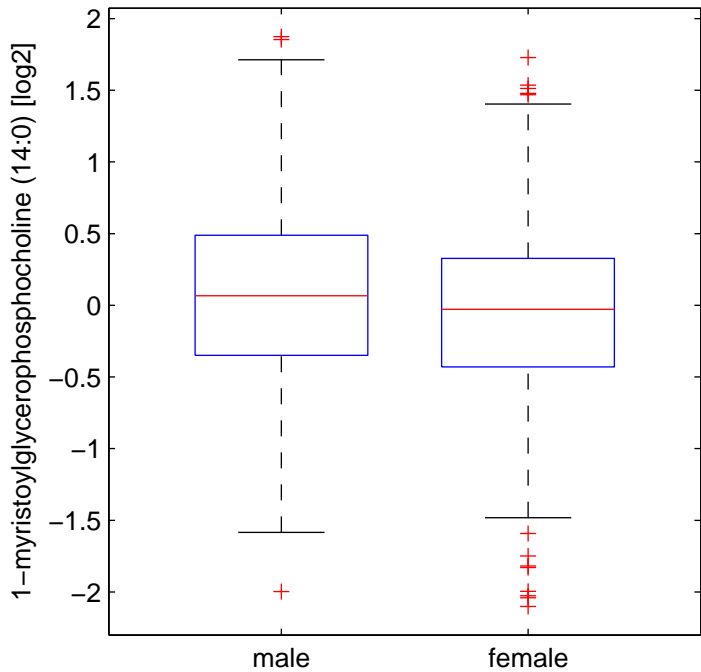

p-val: 5.57e-004

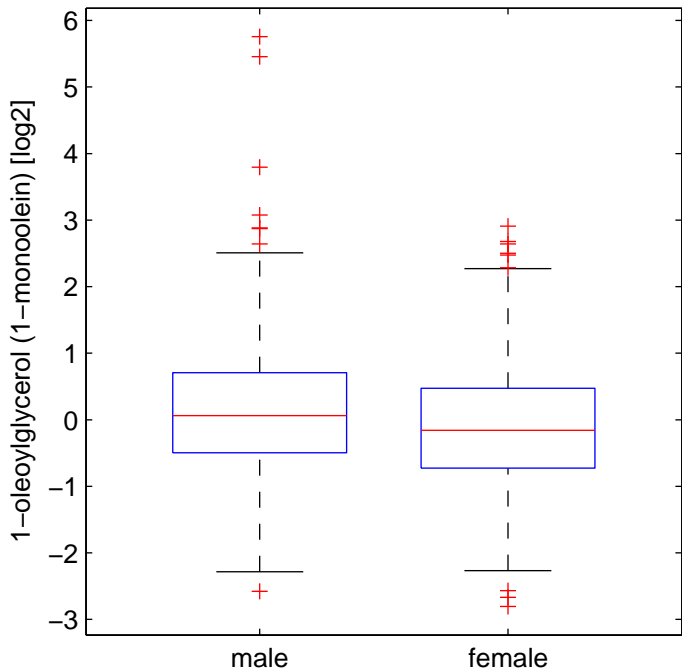

p-val: 3.70e-015

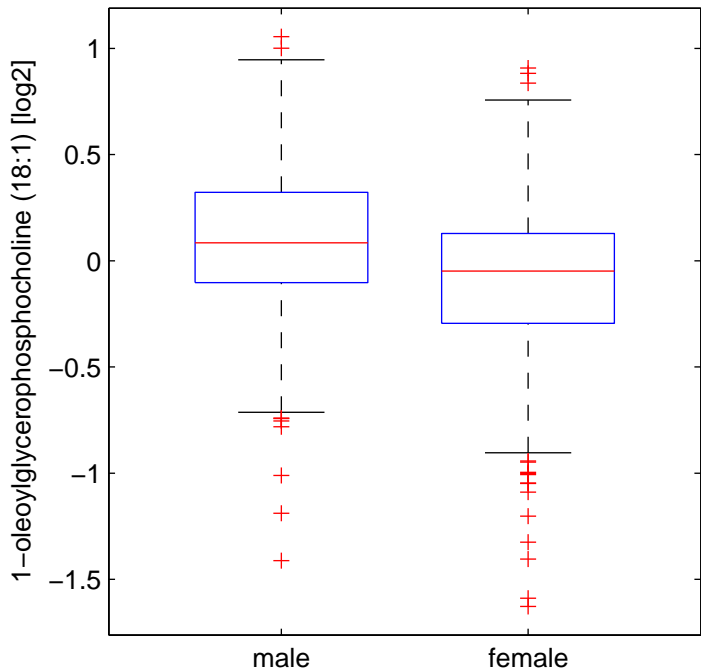

p-val: 1.19e-006

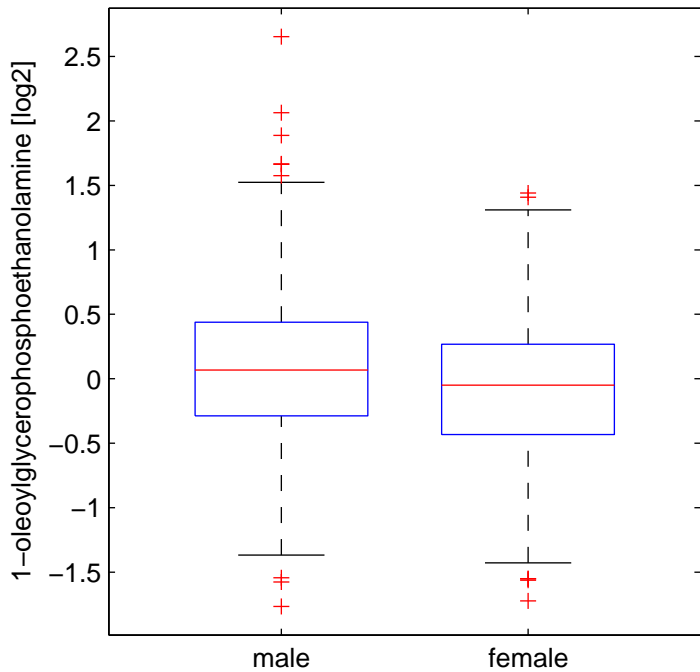

p-val: 2.07e-002

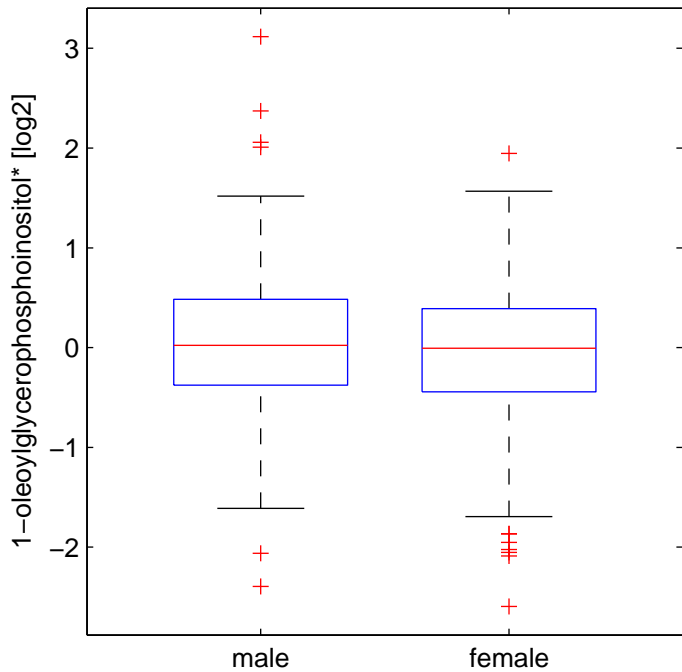

p-val: 2.58e-002

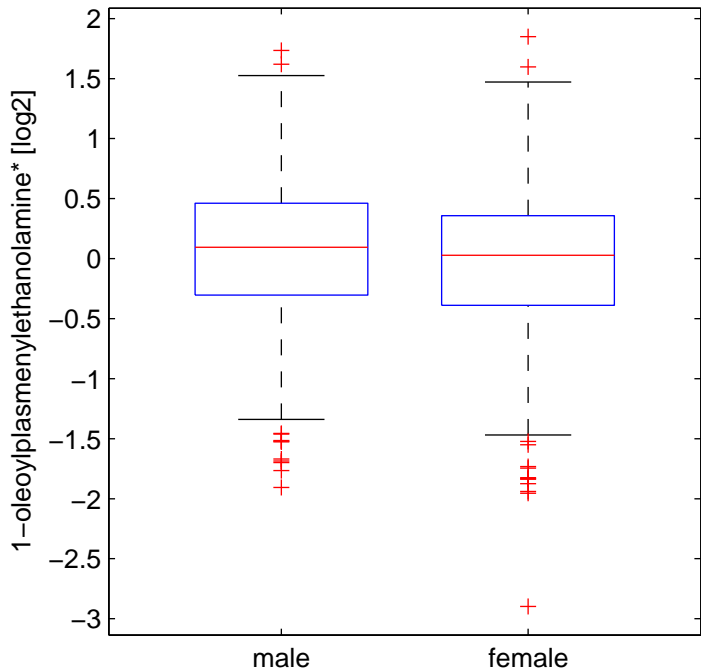

p-val: 8.30e-003

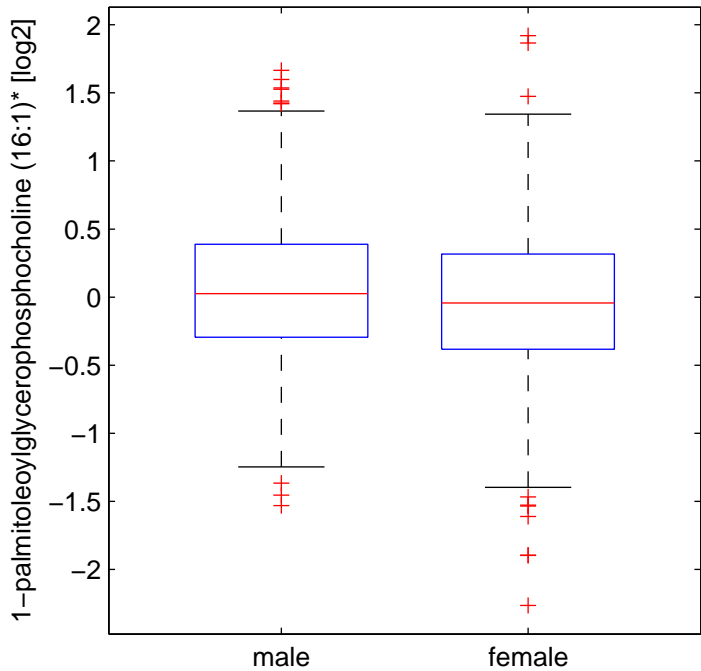

p-val: 1.69e-003

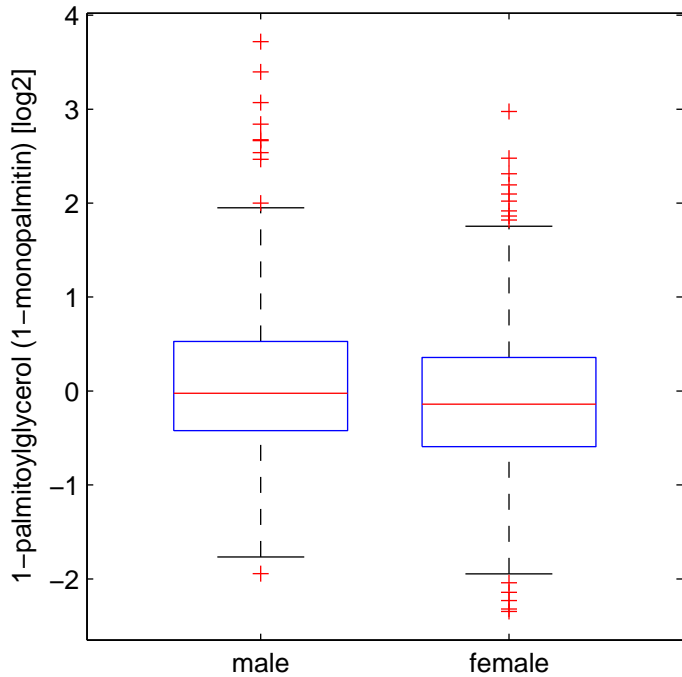



p-val: 1.93e-013

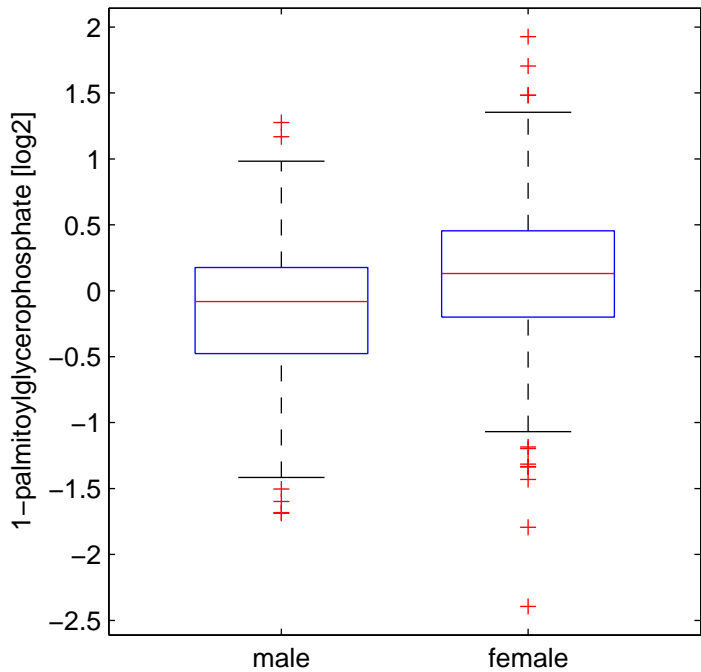

p-val: 1.65e-006

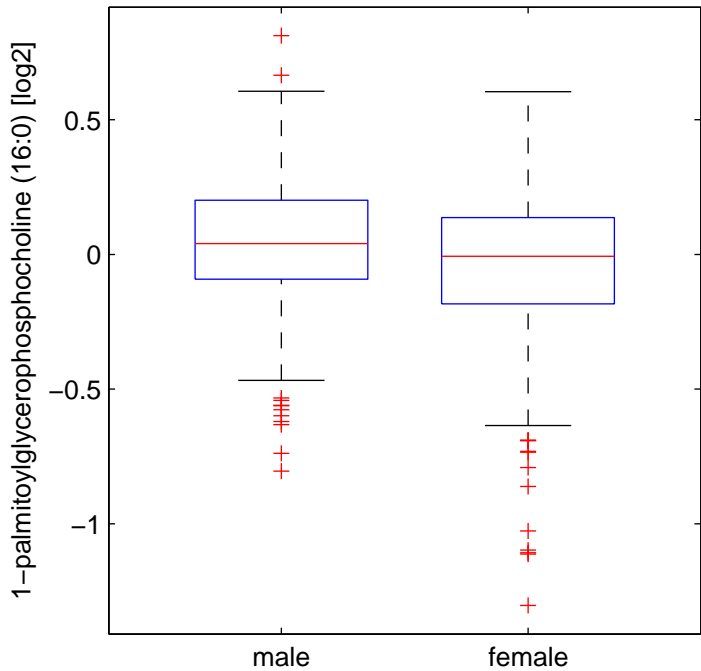

p-val: 1.46e-002

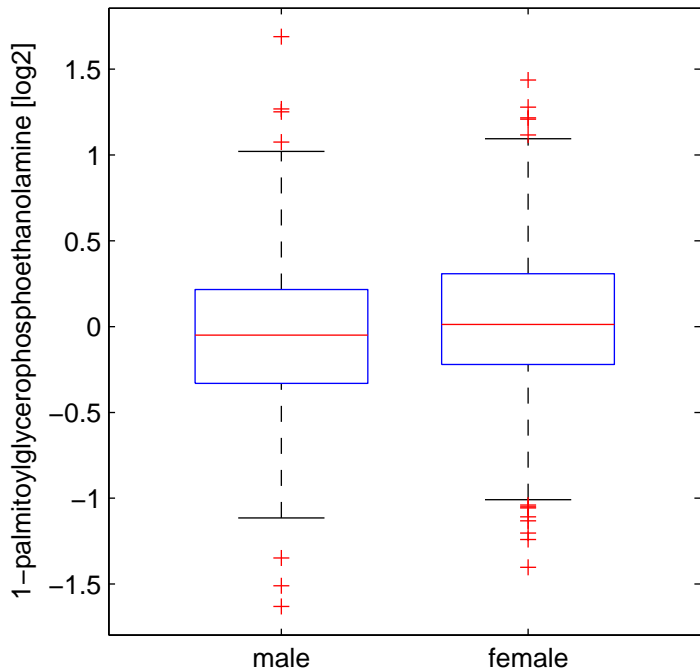

p-val: 2.69e-003

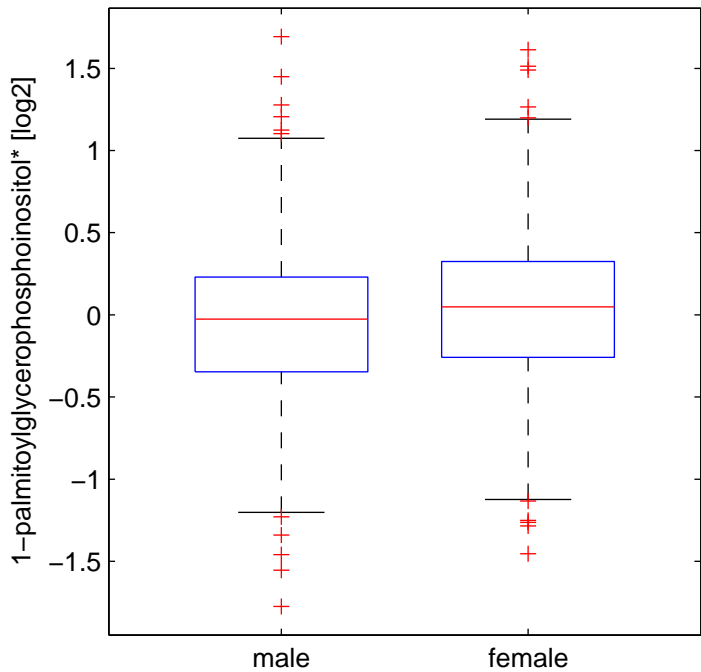

p-val: 2.41e-002

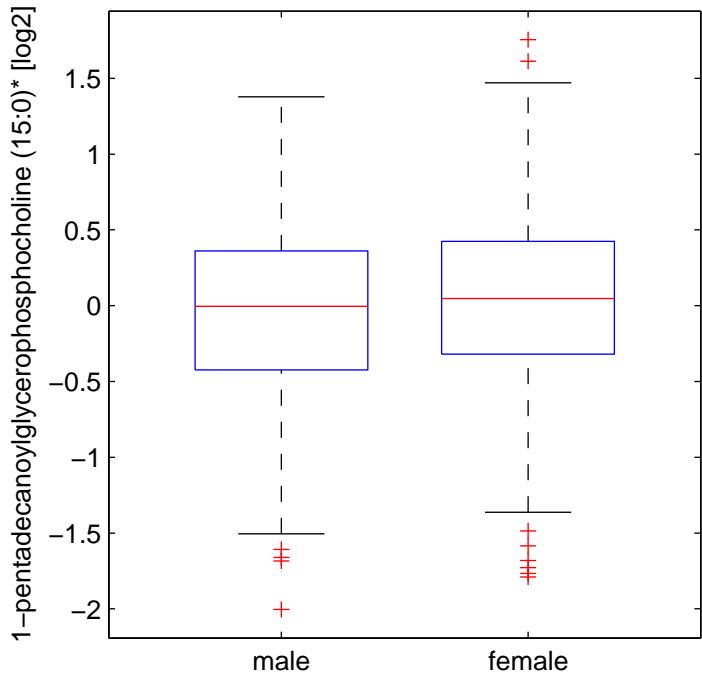

p-val: 1.14e-005

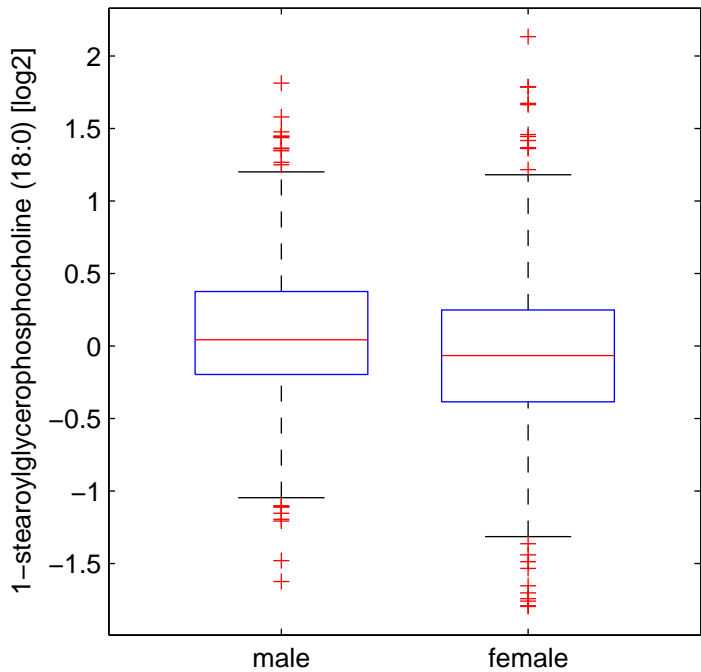

p-val: 2.17e-001

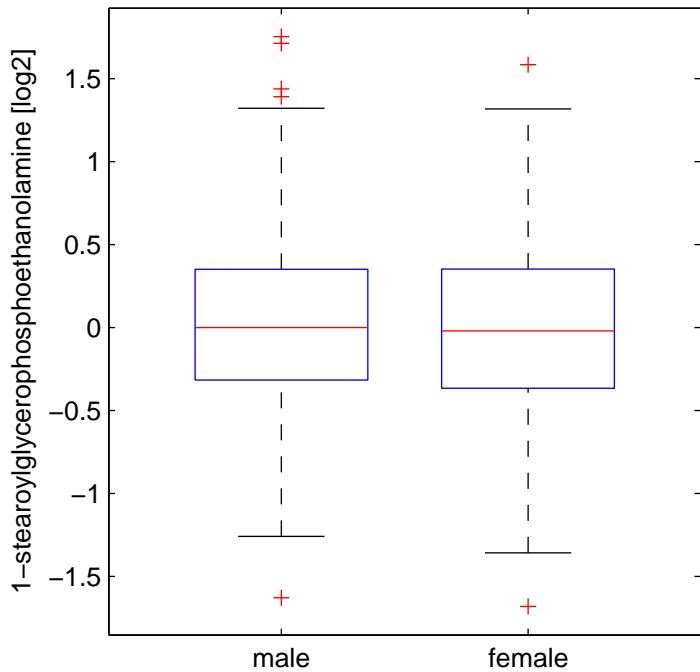

p-val: 5.78e-026

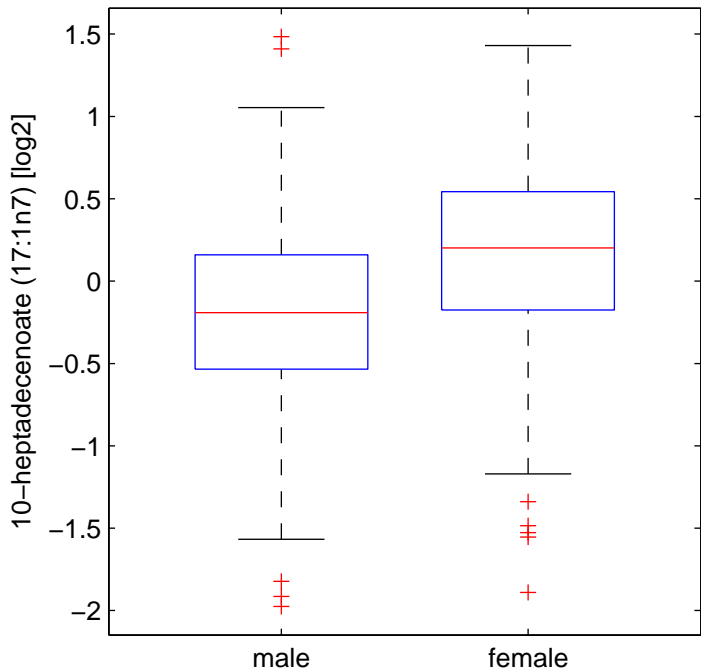



p-val: 1.38e-016

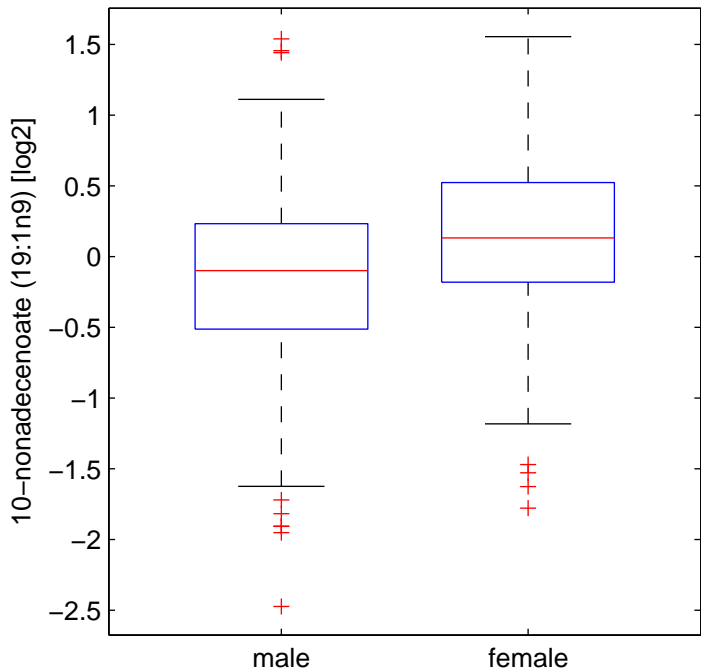

p-val: 6.27e-001

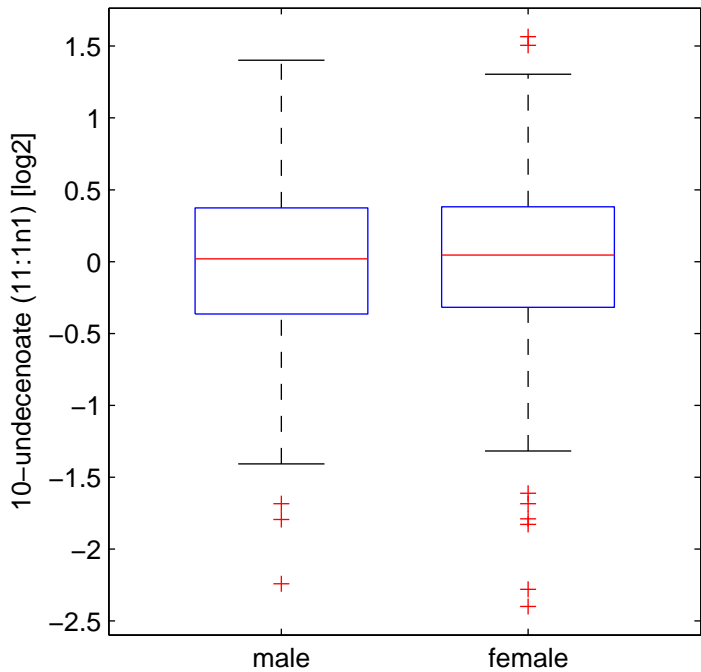

p-val: 2.21e-001

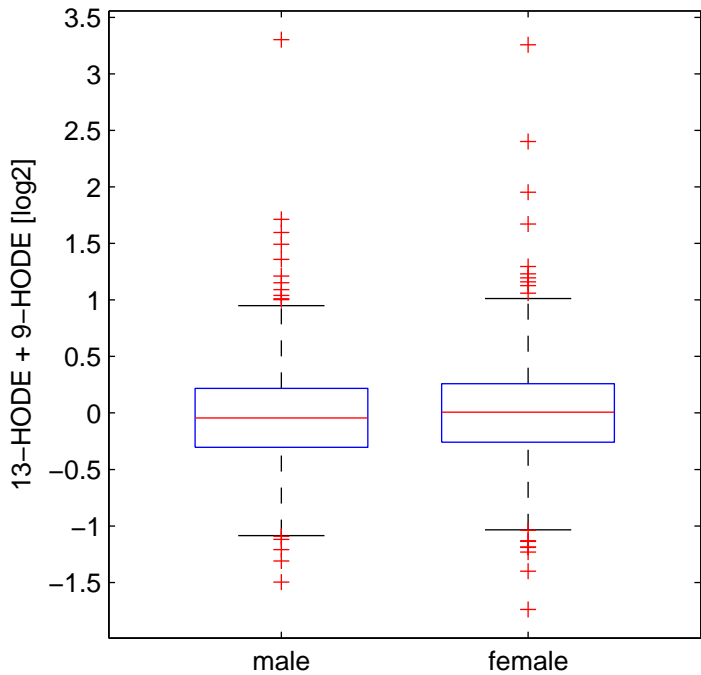

15-methyl/palmitate (isobar with 2-methyl/palmitate) [log2]

p-val: 3.30e-016

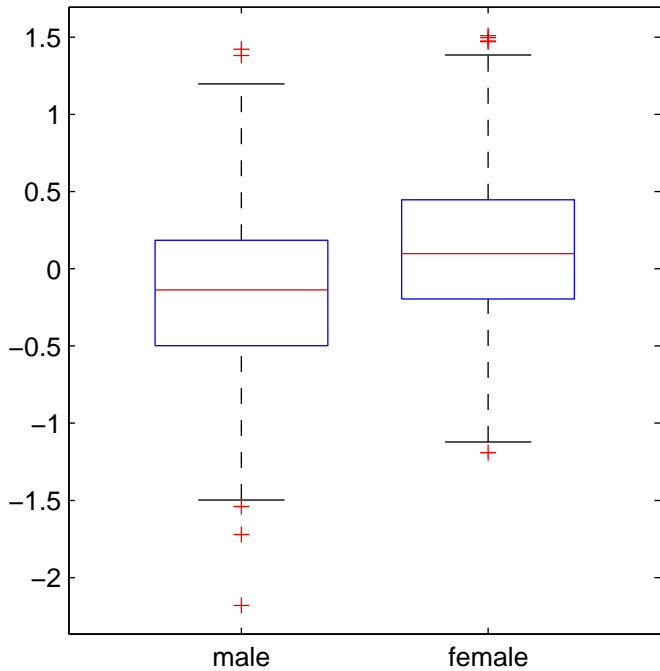

p-val: 4.43e-011

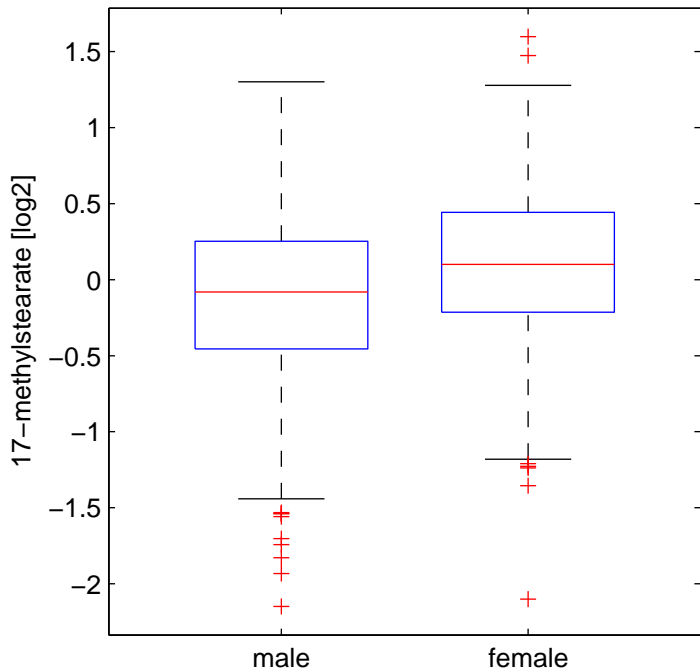

p-val: 1.38e-009

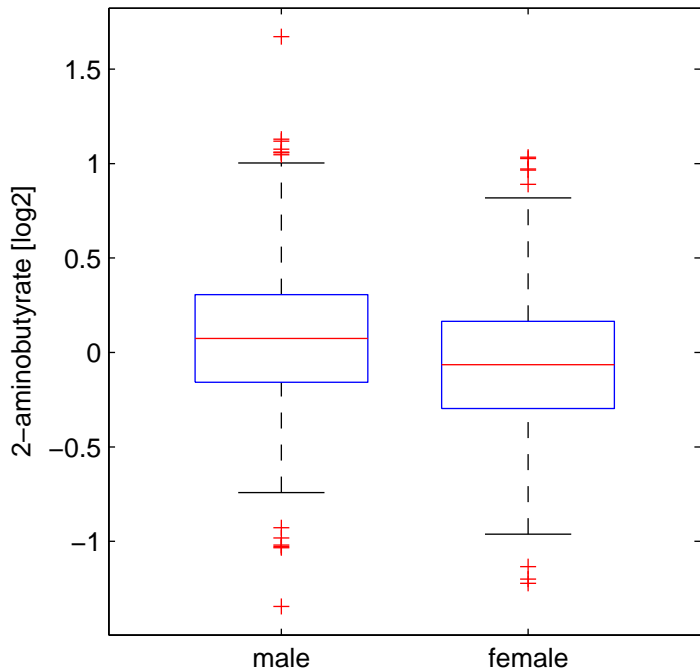

p-val: 2.20e-004

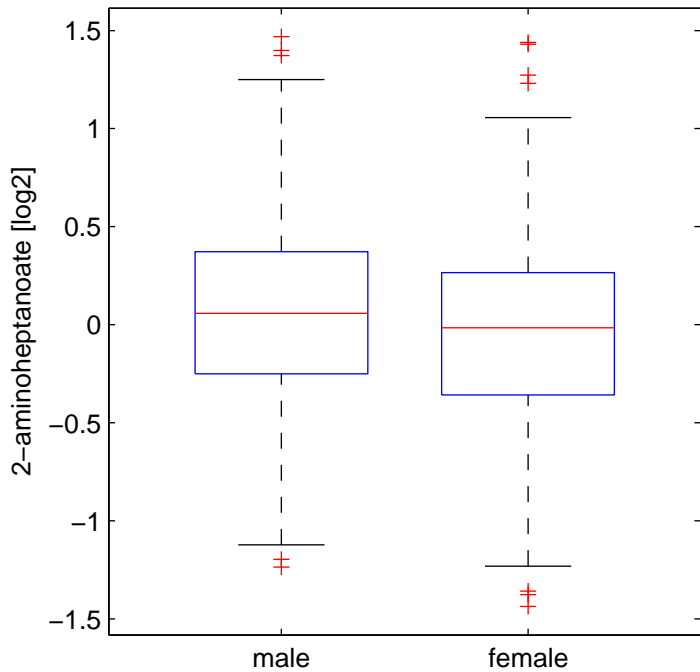

p-val: 1.57e-011

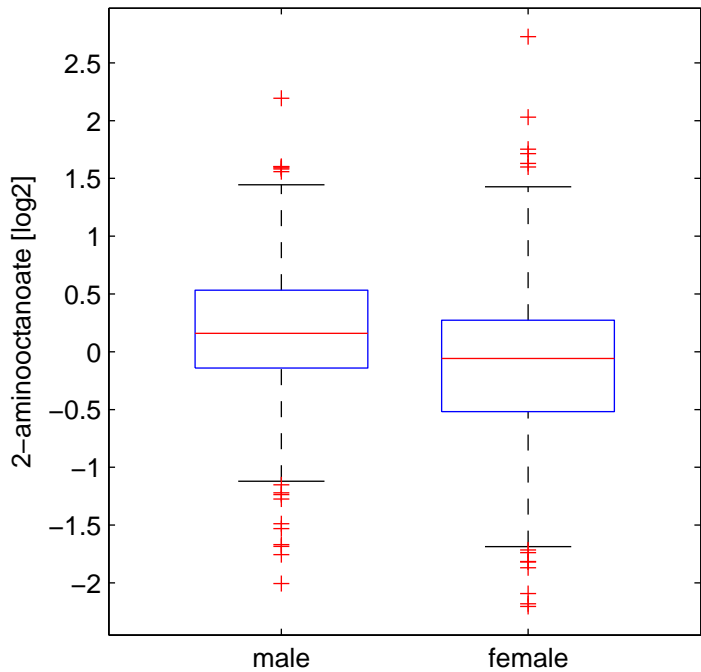



p-val: 9.89e-010

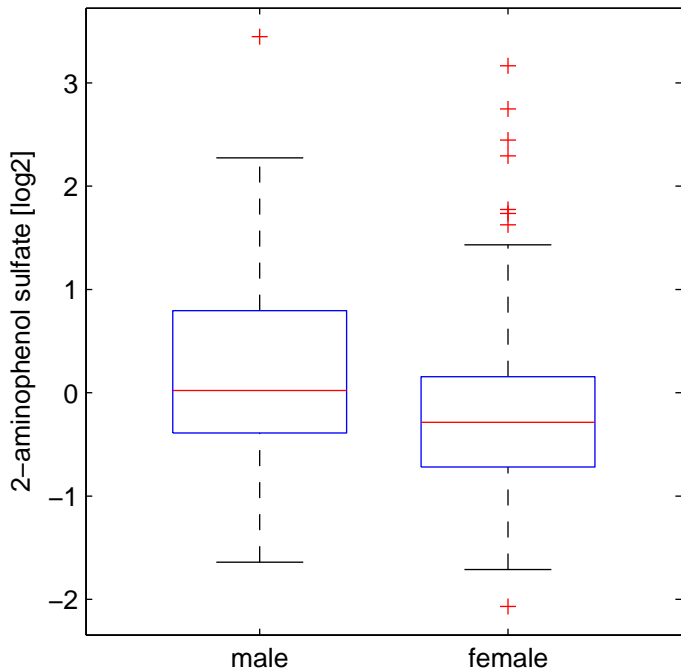

p-val: 2.03e-008

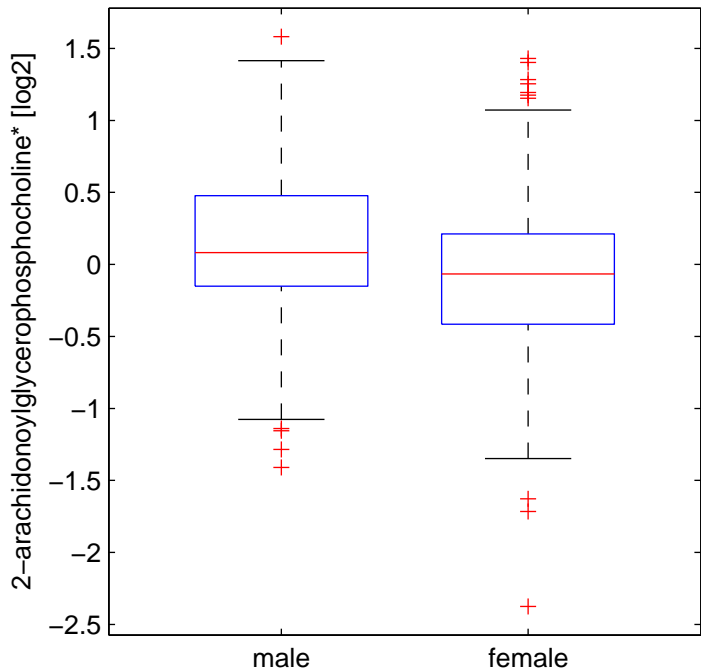

p-val: 9.16e-002

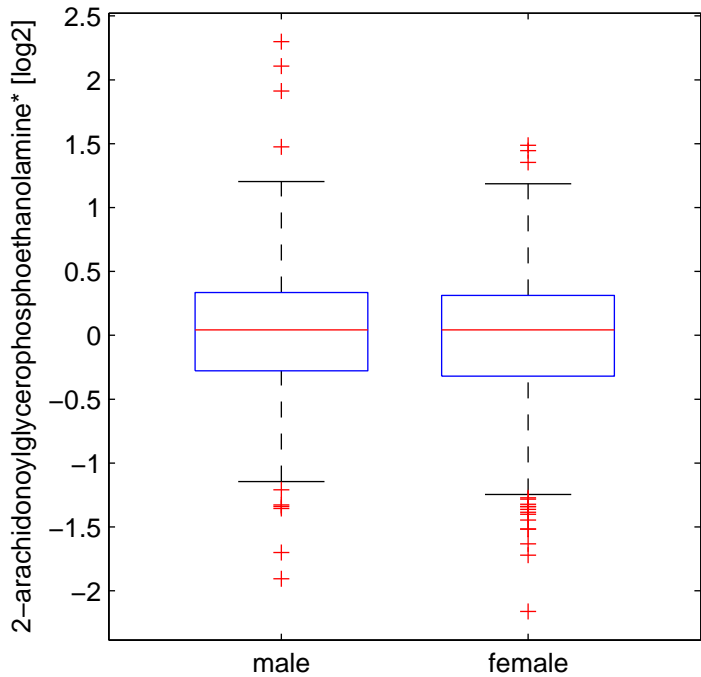

2-docosaheptaenoylglycerophosphoethanolamine\* [log2]

p-val: 2.13e-001

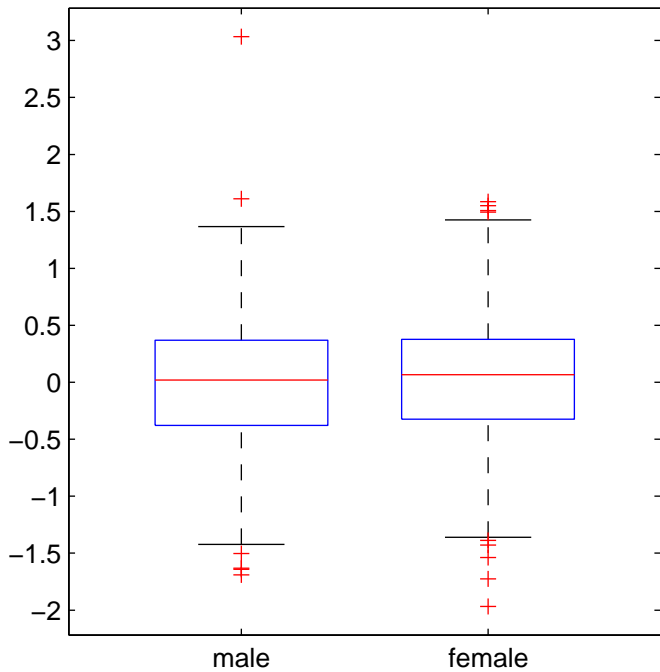

p-val: 1.42e-005

2-ethylhexanoate (isobar with 2-propylpentanoate) [log2]

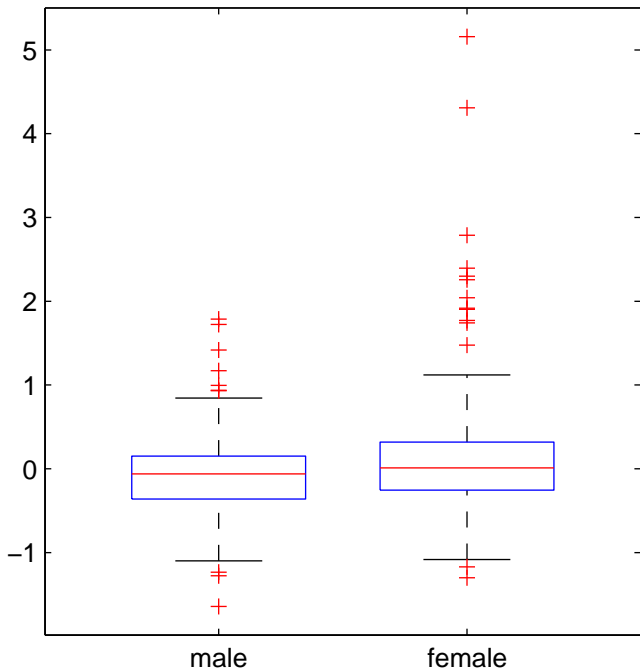

p-val: 5.73e-001

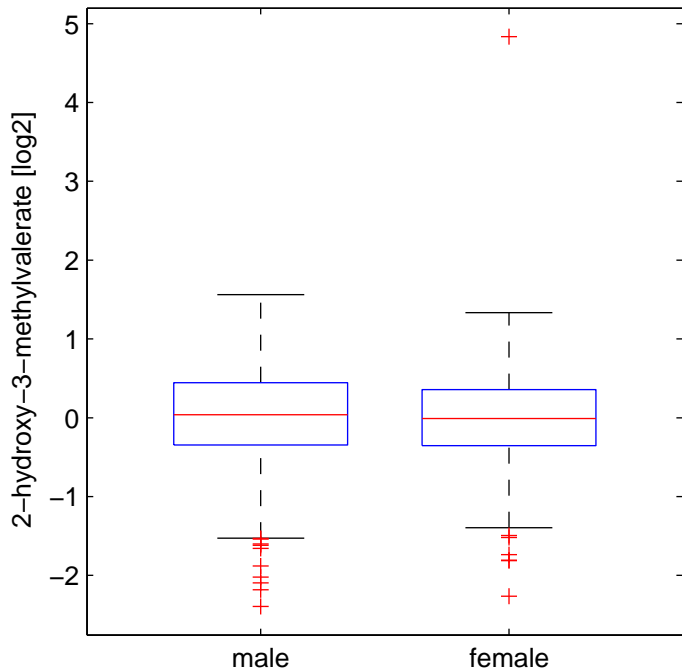

p-val: 1.81e-004

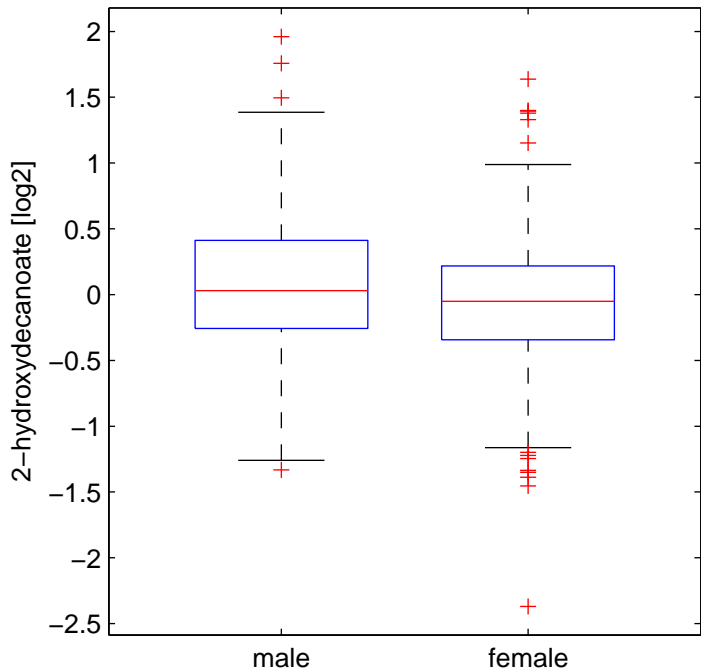

p-val: 8.64e-001

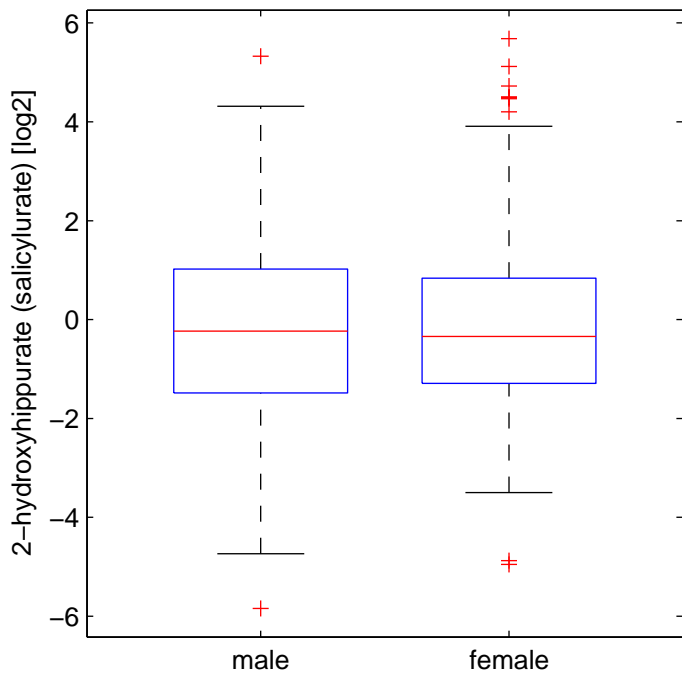



p-val: 2.67e-003

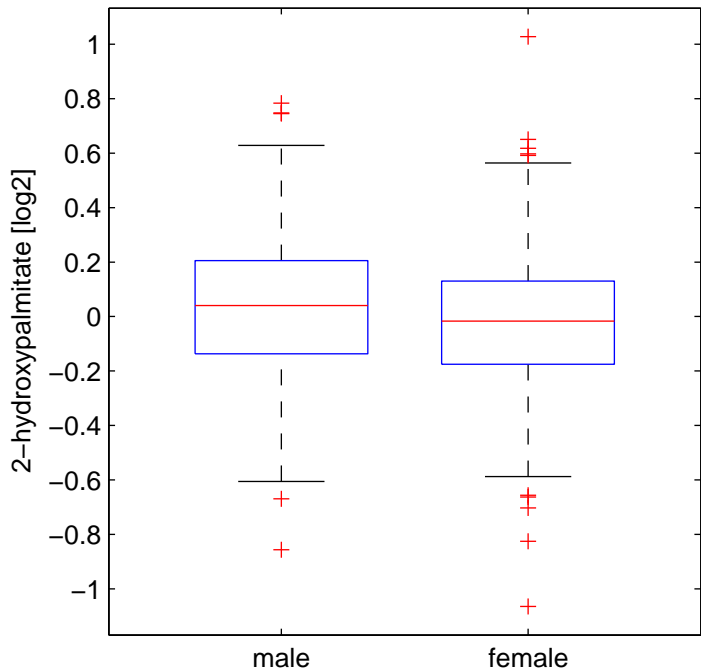

p-val: 1.01e-001

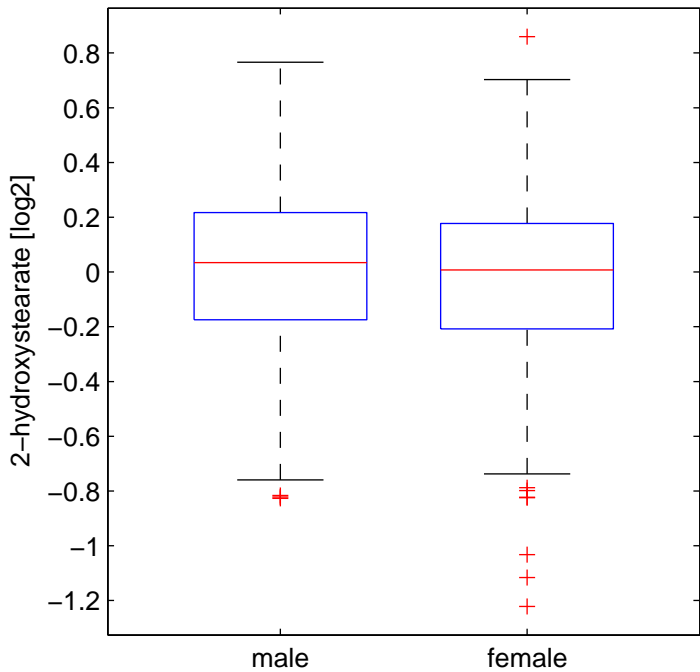

p-val: 1.95e-018

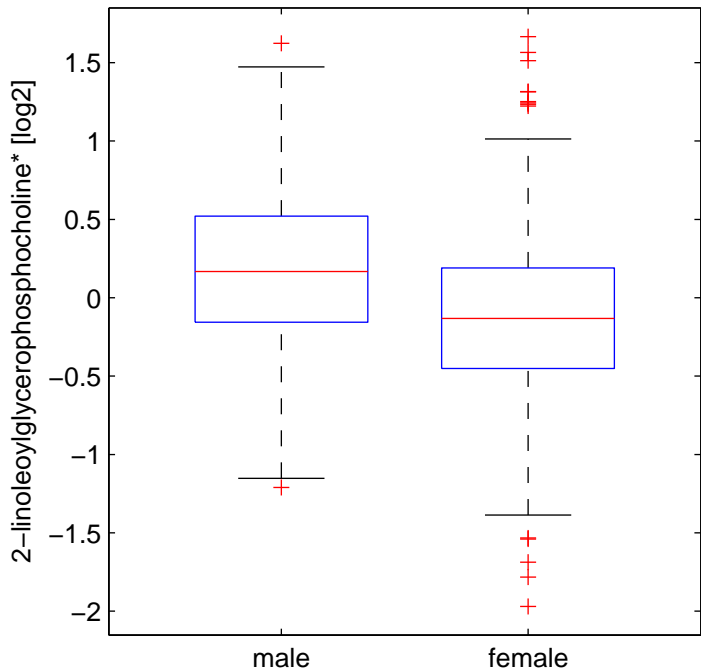

p-val: 3.70e-002

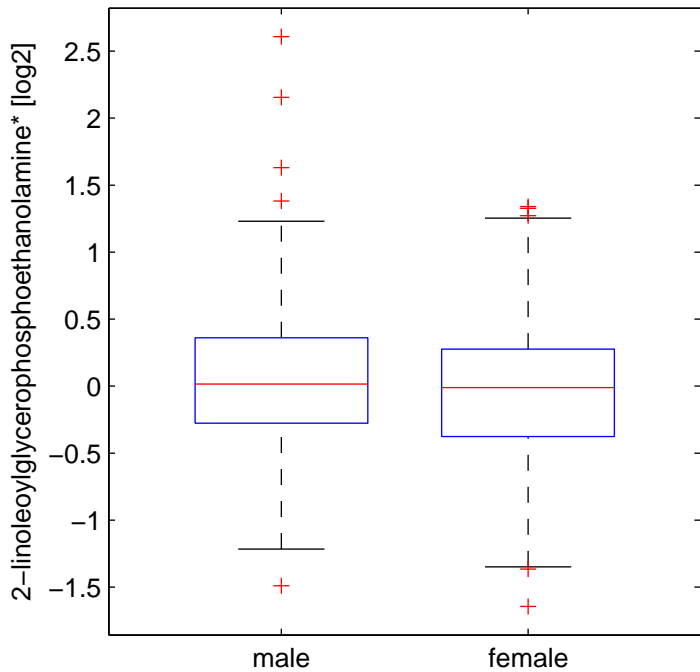

p-val: 5.05e-040

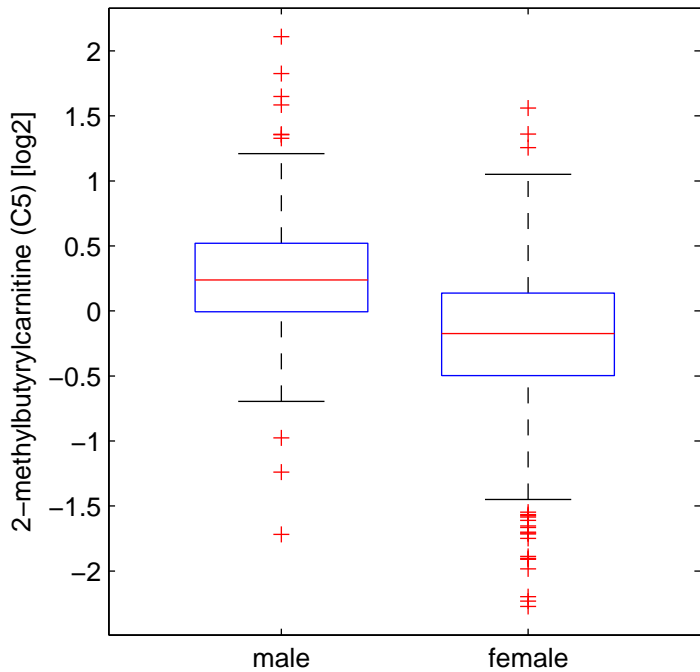

p-val: 2.36e-003

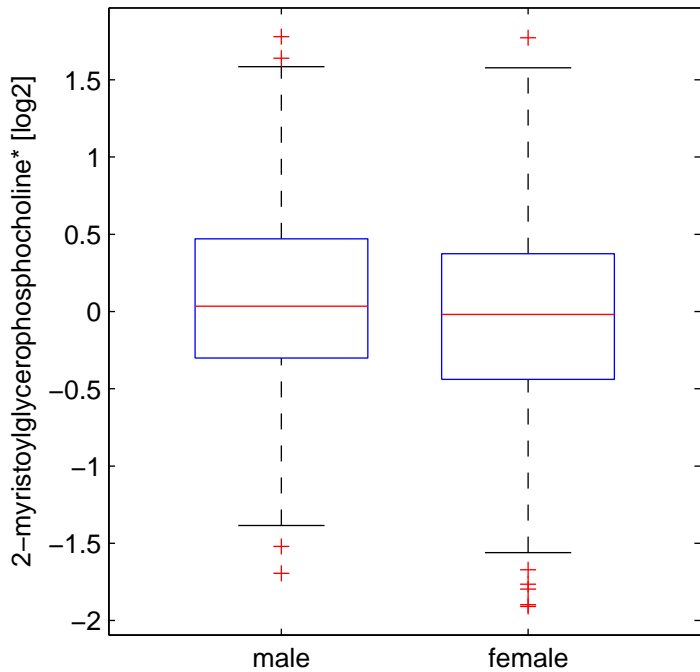

p-val: 9.15e-011

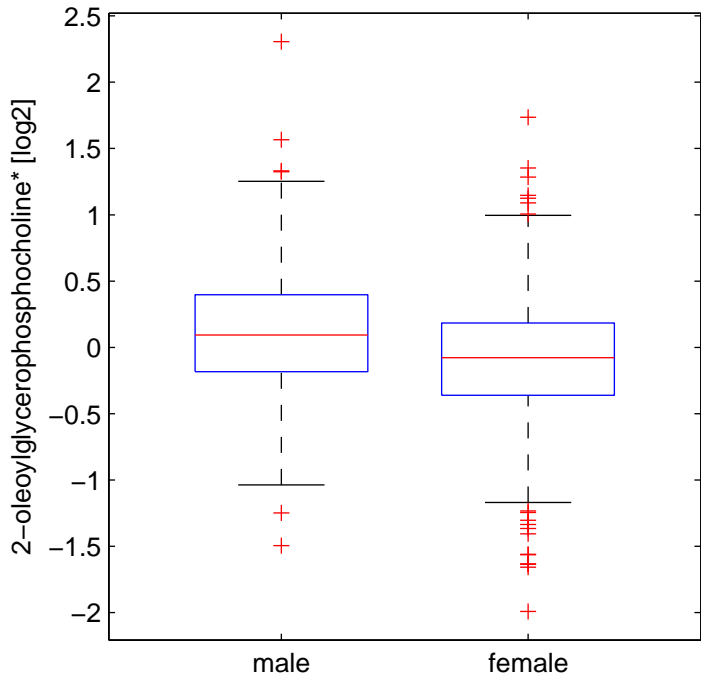

p-val: 4.53e-003

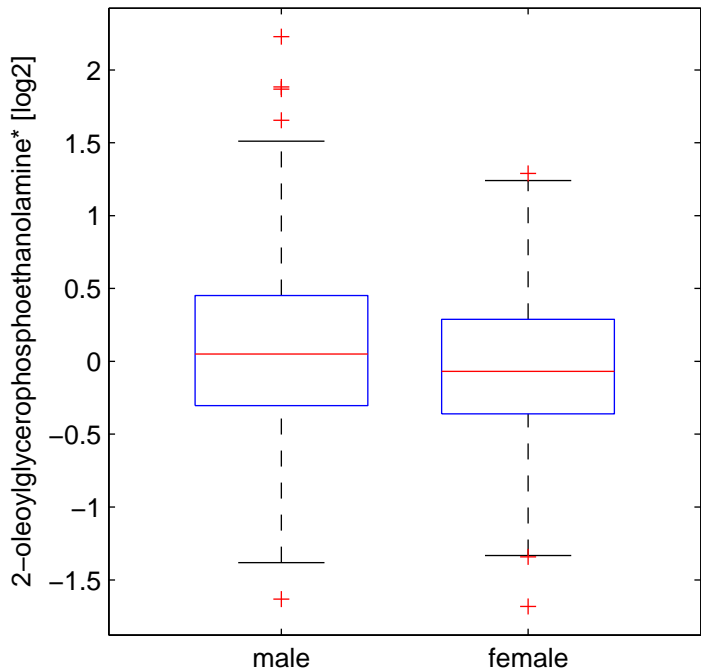



p-val: 3.84e-003

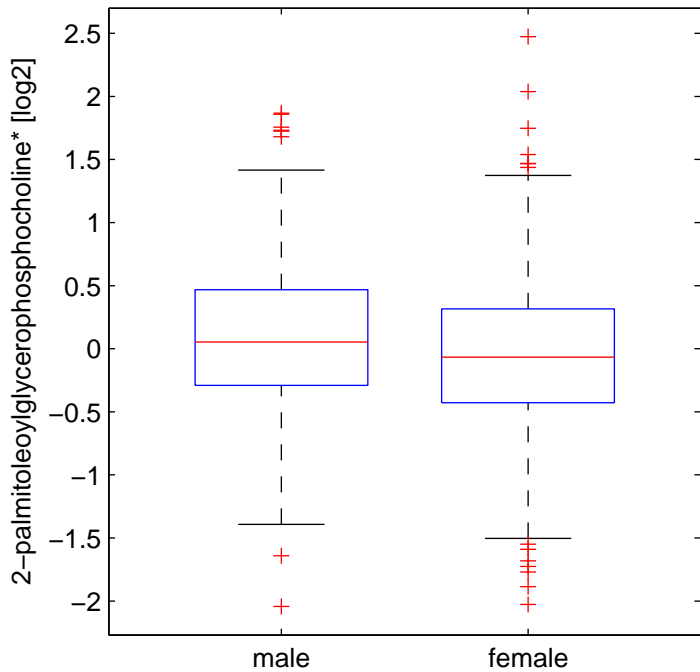



p-val: 2.13e-002

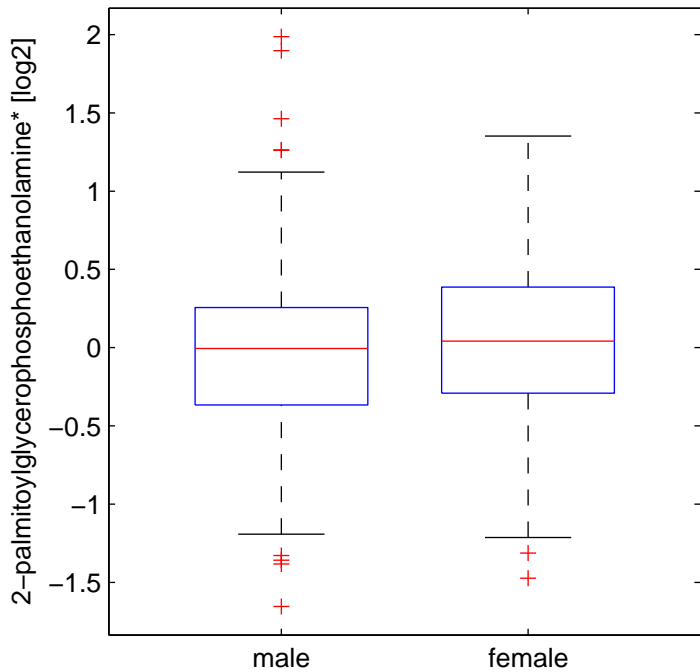

p-val: 2.31e-005

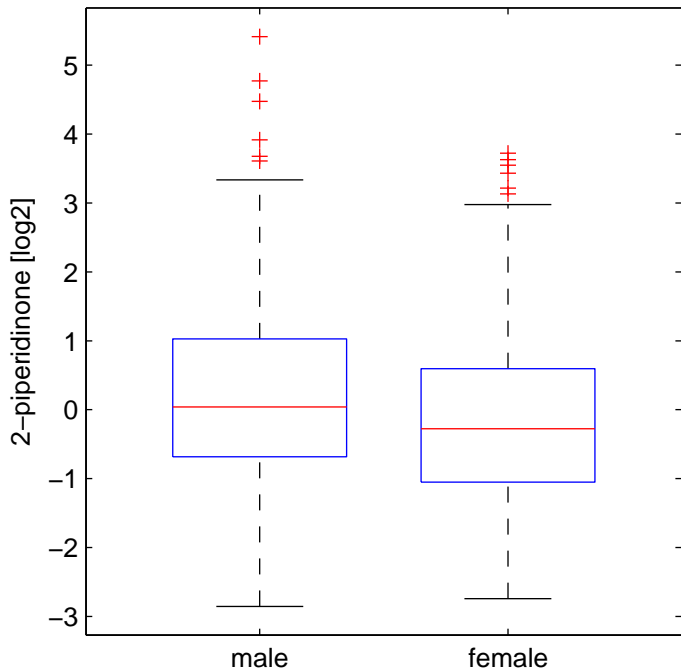

p-val: 5.19e-010

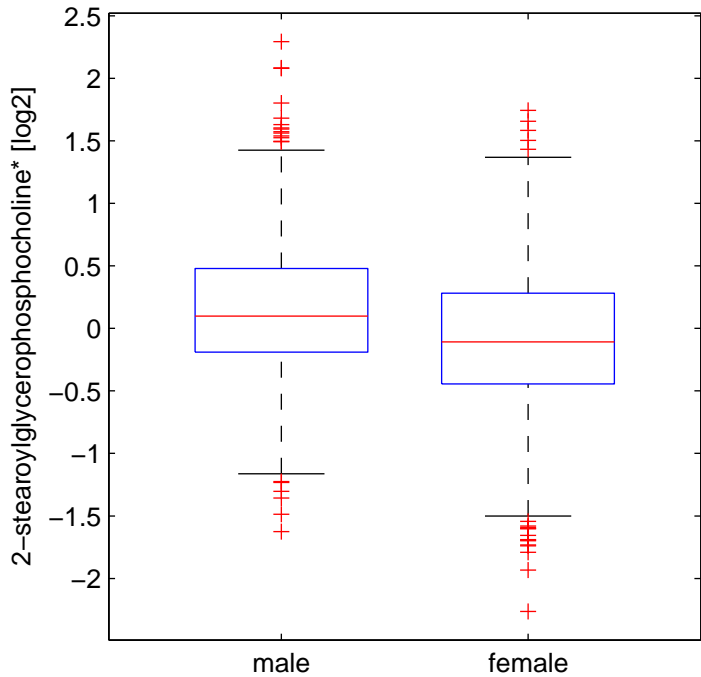

p-val: 1.28e-020

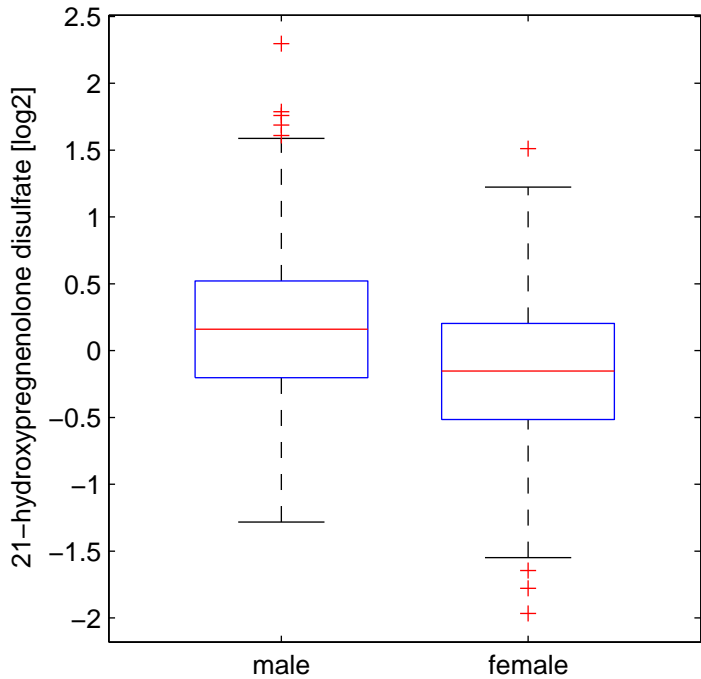

p-val: 4.15e-040

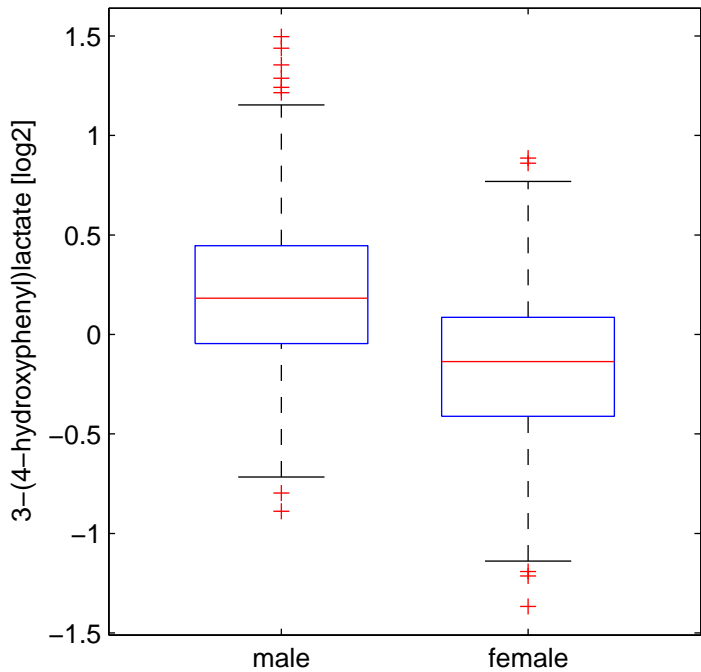

3-carboxy-4-methyl-5-propyl-2-furanpropanoate (CMPF) [log2]

p-val: 1.19e-003

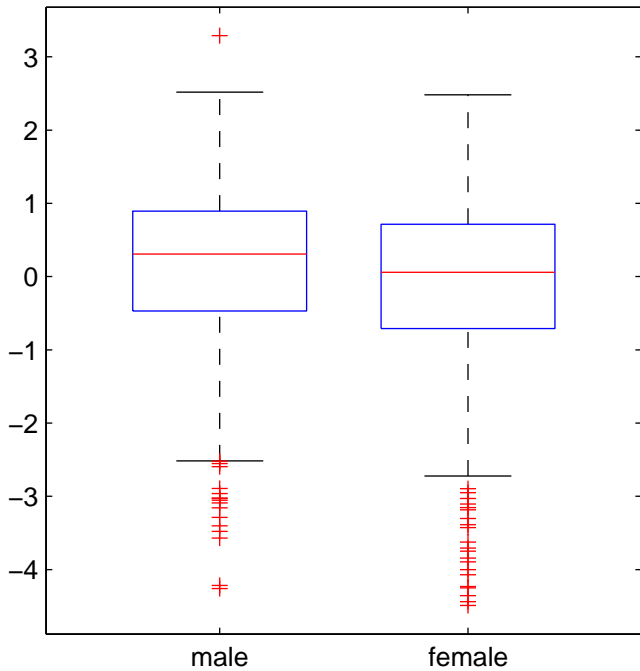



p-val: 1.90e-003

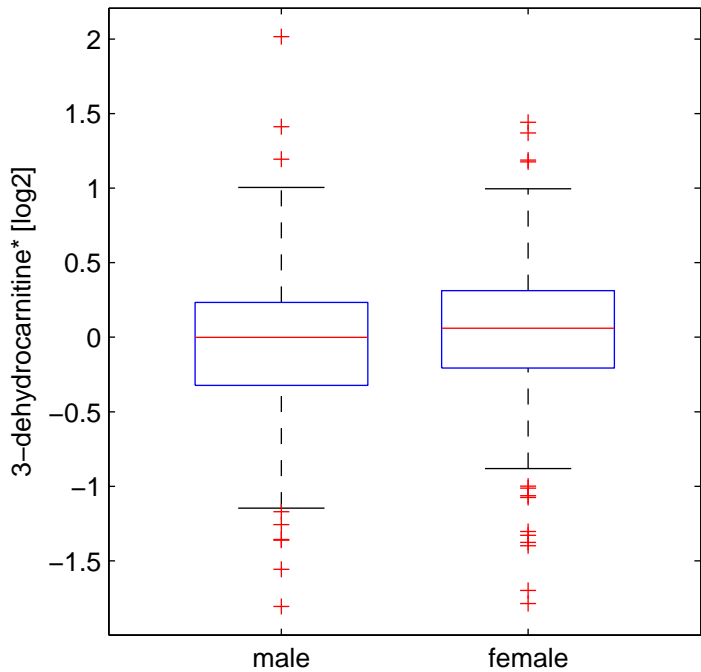

p-val: 2.31e-003

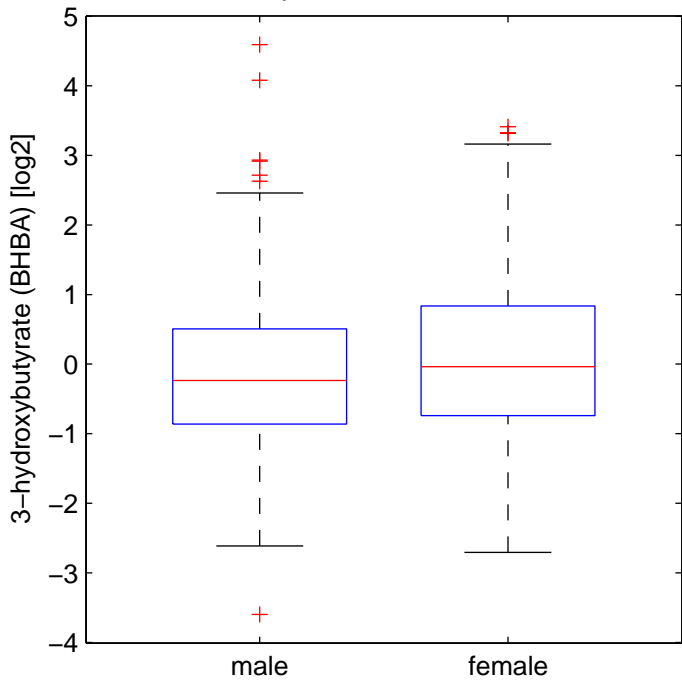

p-val: 1.80e-001

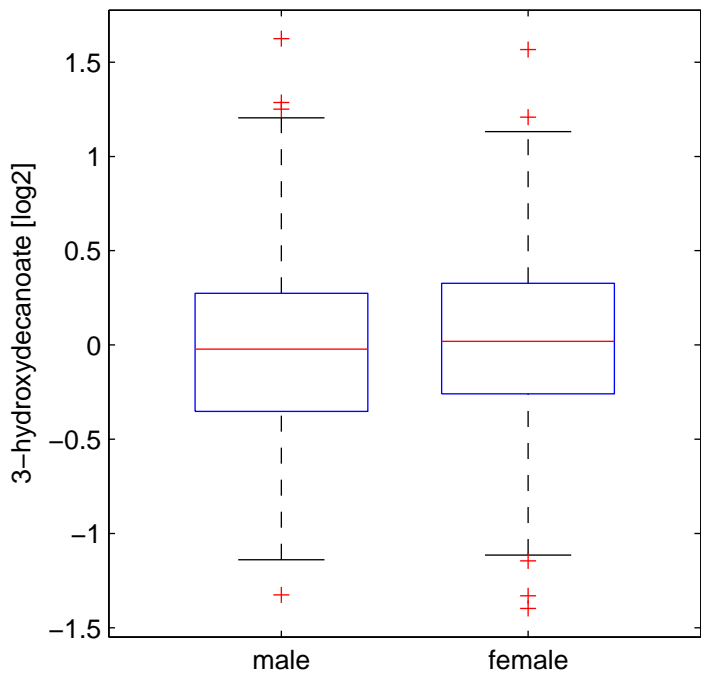

p-val: 9.06e-002

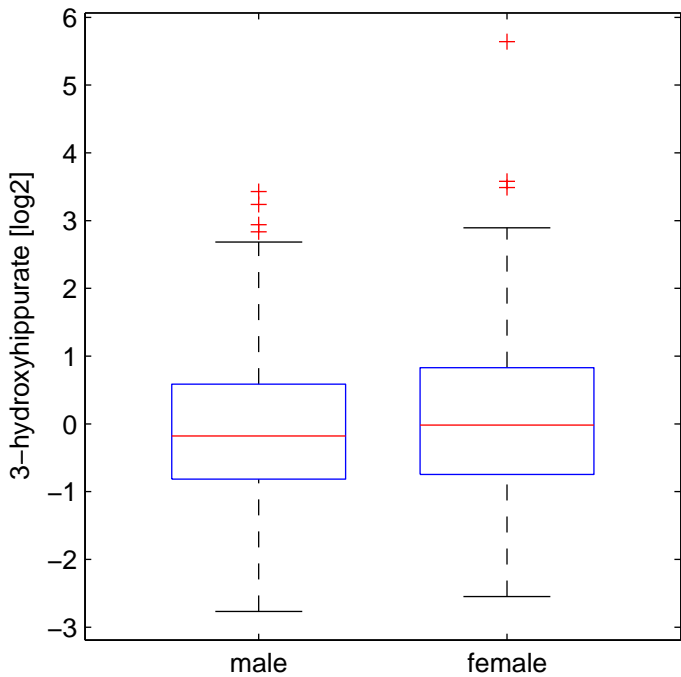

p-val: 3.65e-003

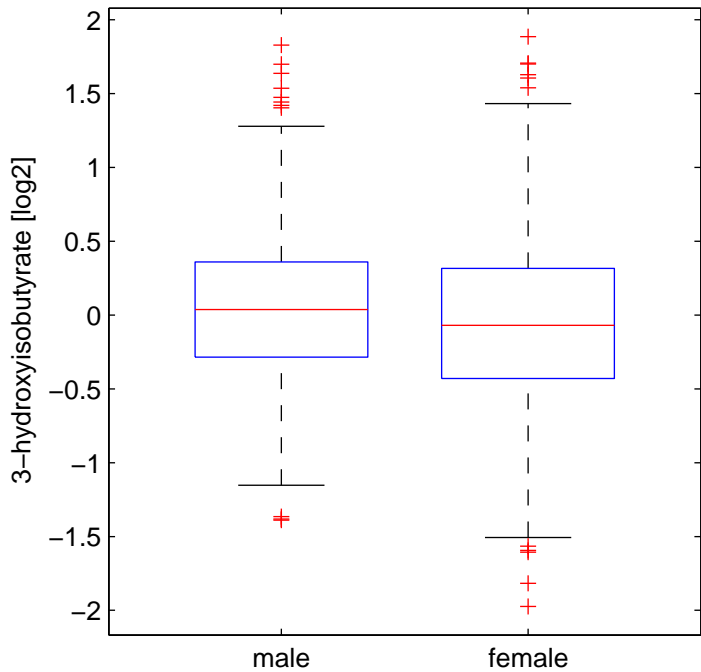

p-val: 1.28e-001

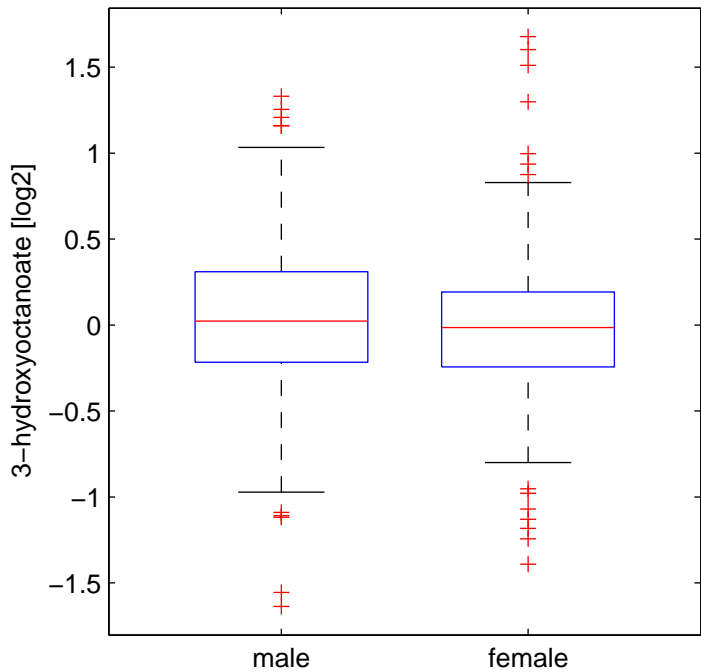

p-val: 5.19e-001

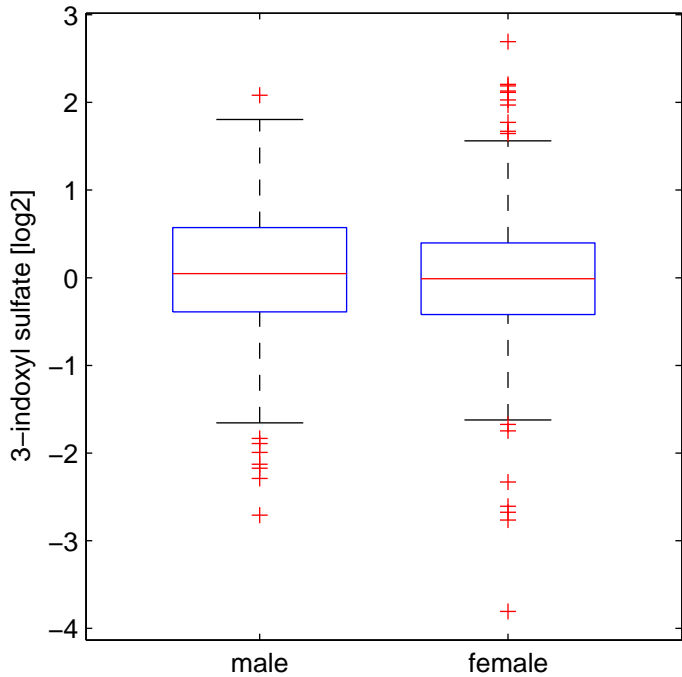

p-val: 7.39e-002

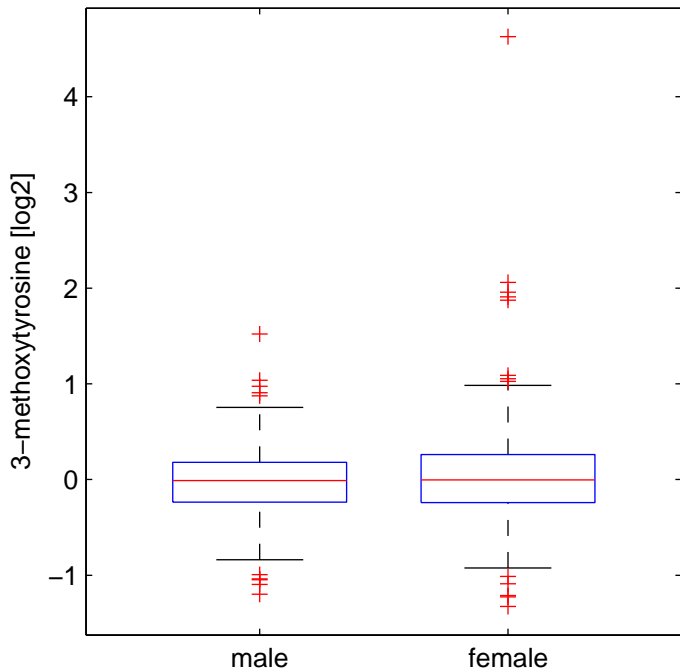



p-val: 5.44e-001

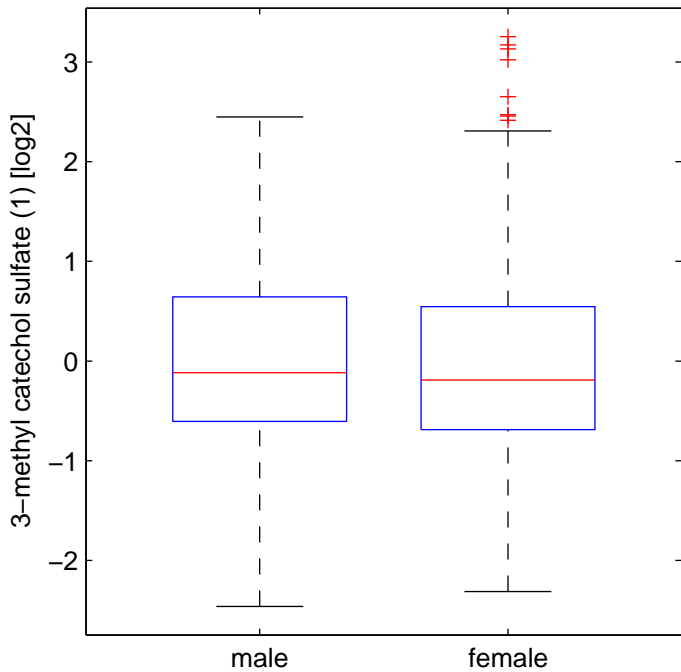

p-val: 5.28e-021

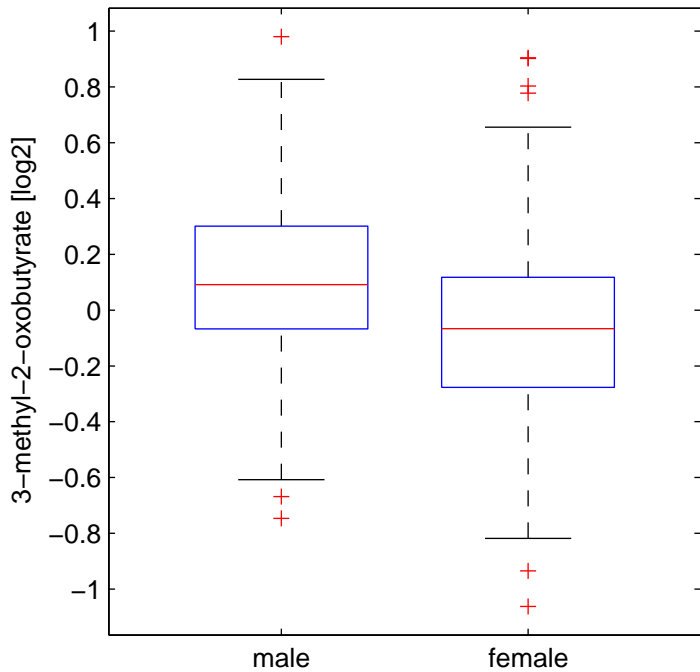

p-val: 2.94e-062

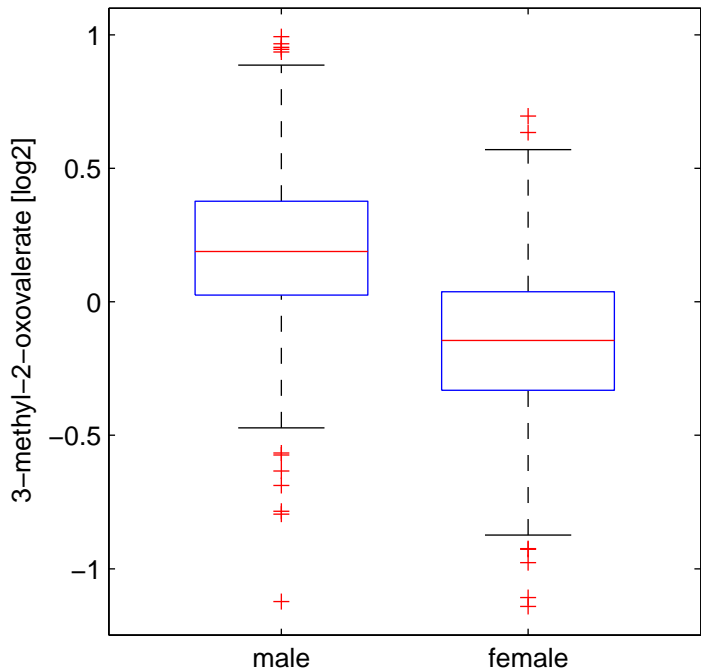

p-val: 8.06e-008

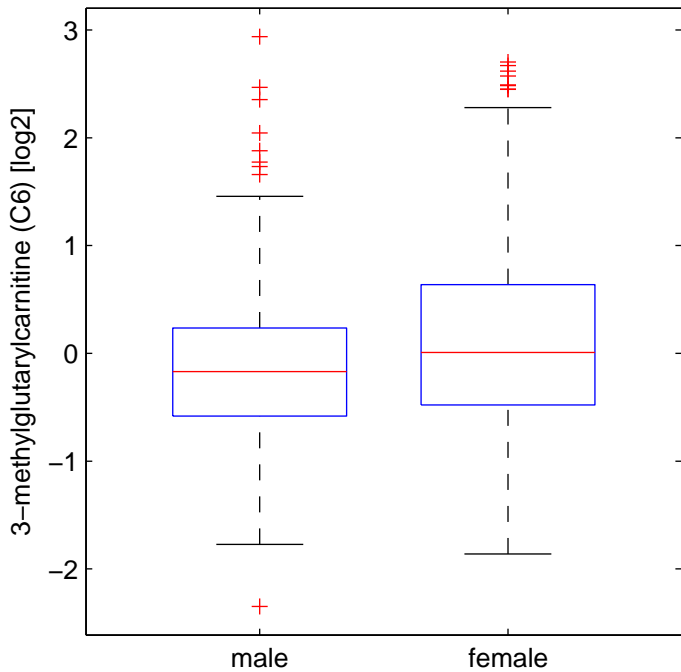

p-val: 1.17e-002

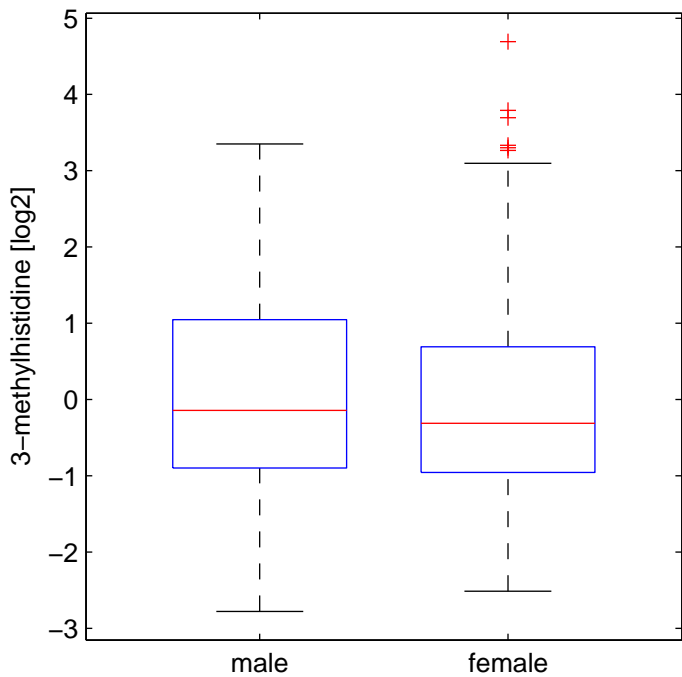

p-val: 2.08e-001

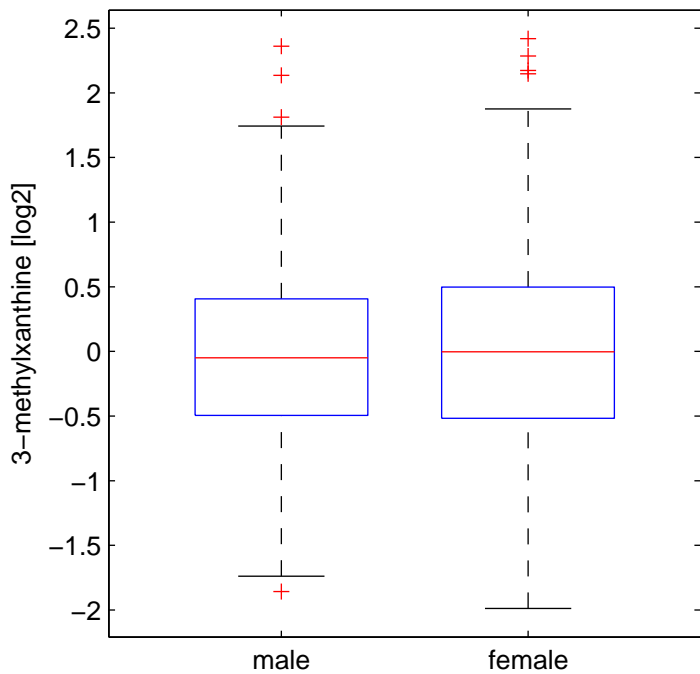

p-val: 1.11e-002

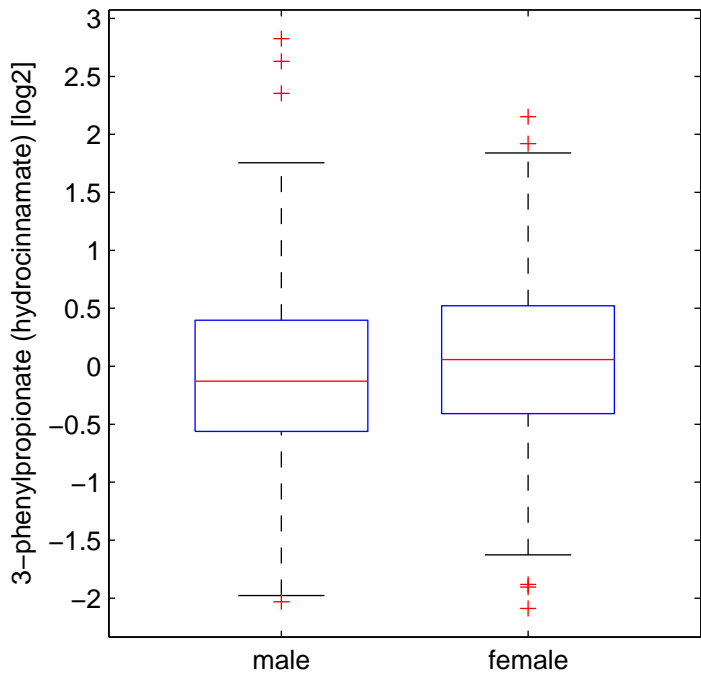

p-val: 3.57e-001

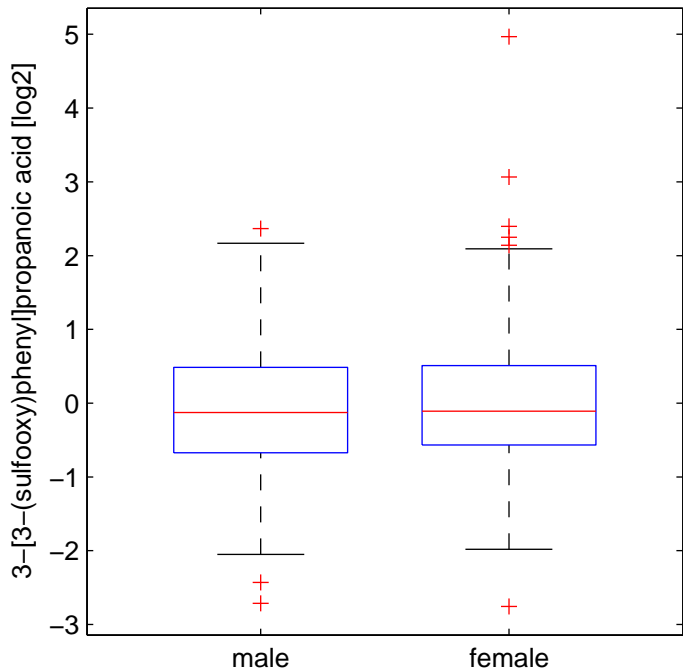



p-val: 9.52e-001

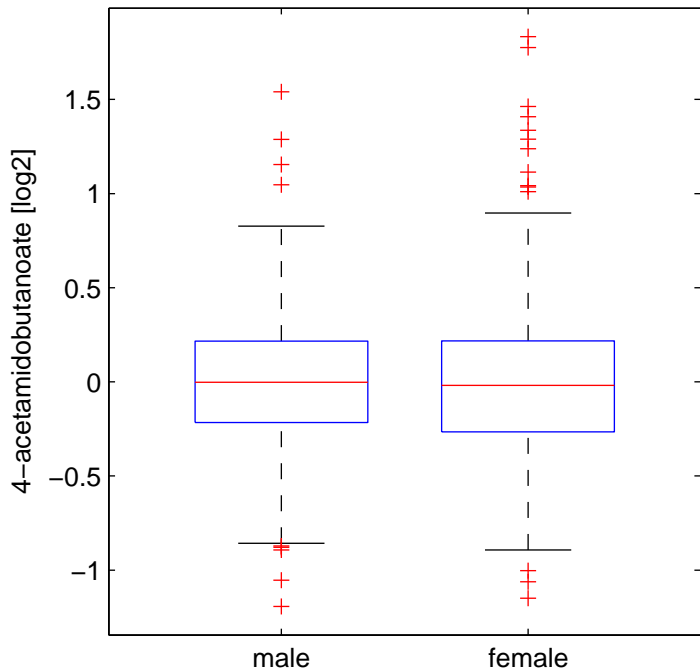

p-val: 6.45e-043

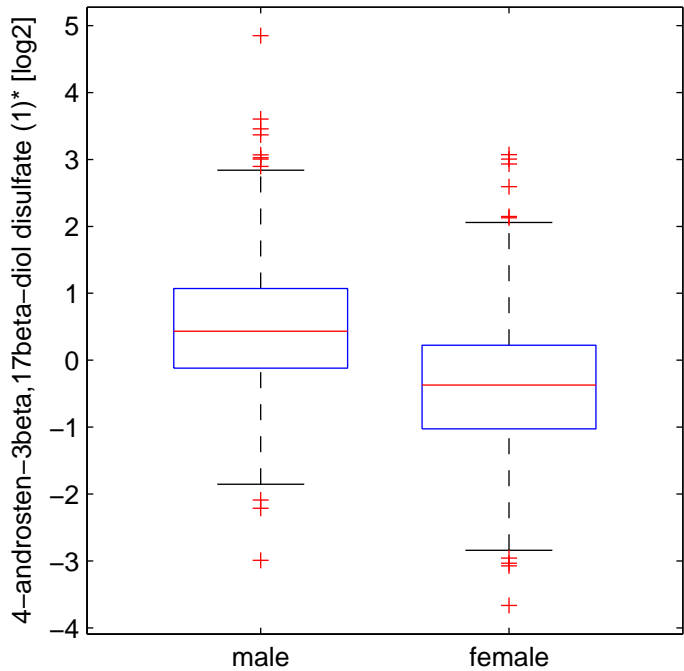

p-val: 6.99e-048

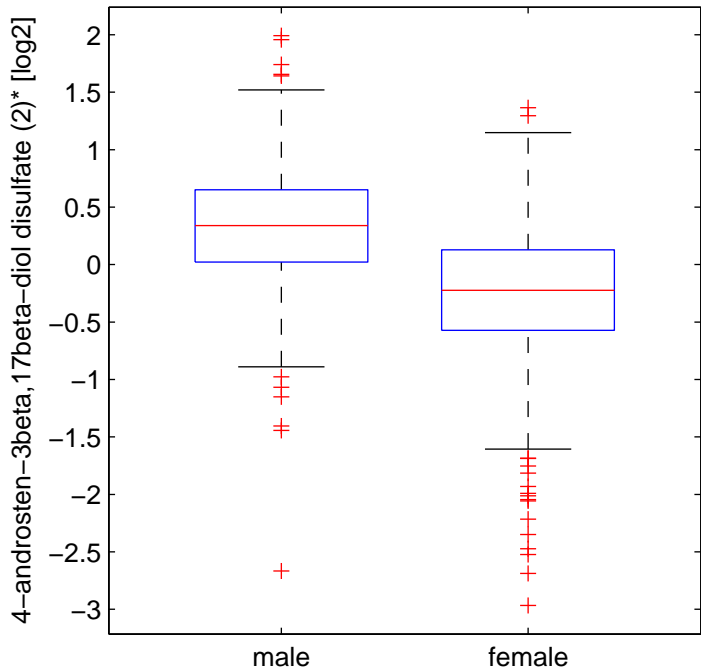

p-val: 1.97e-001

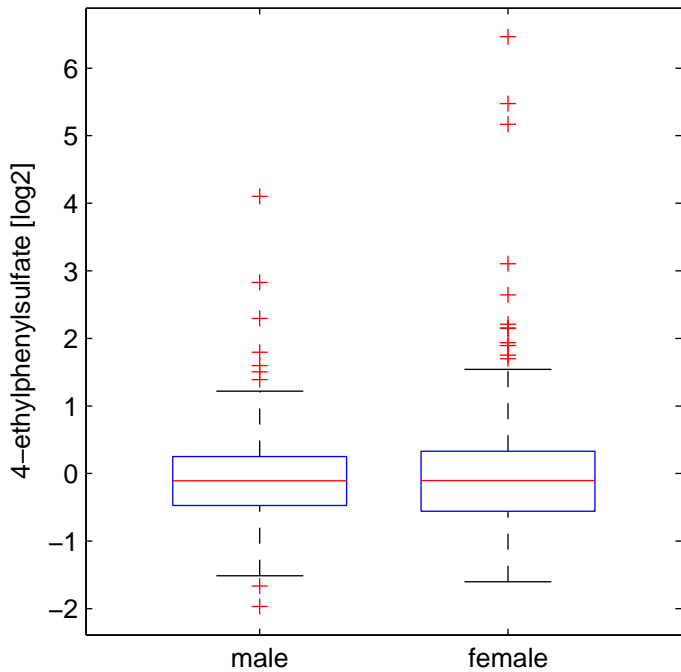

p-val: 1.59e-004

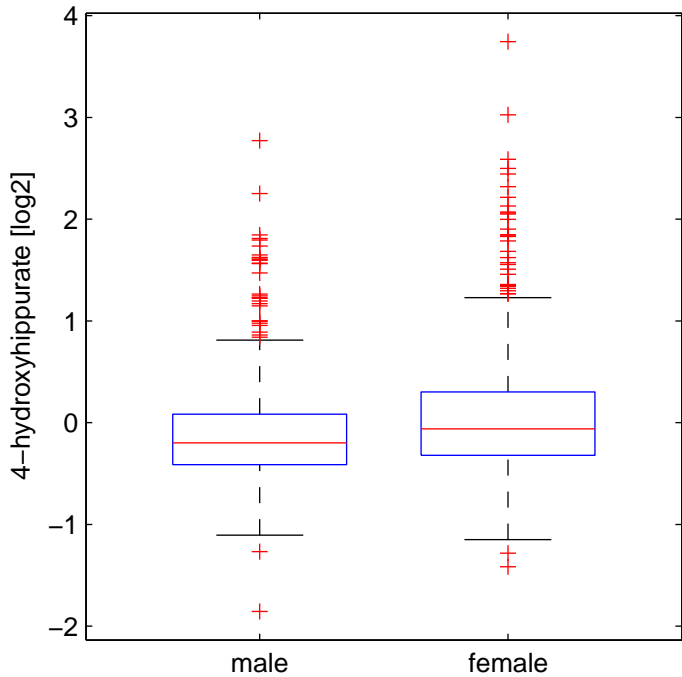

p-val:  $8.96e-058$

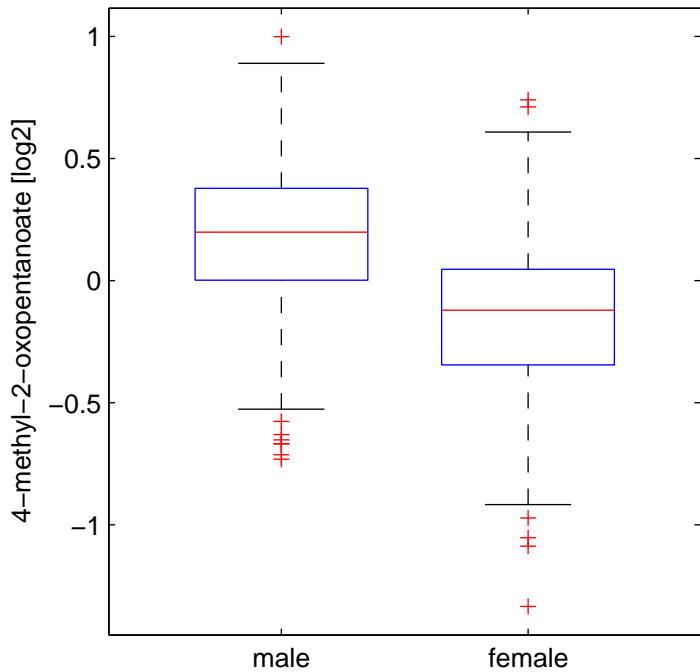

p-val: 2.99e-001

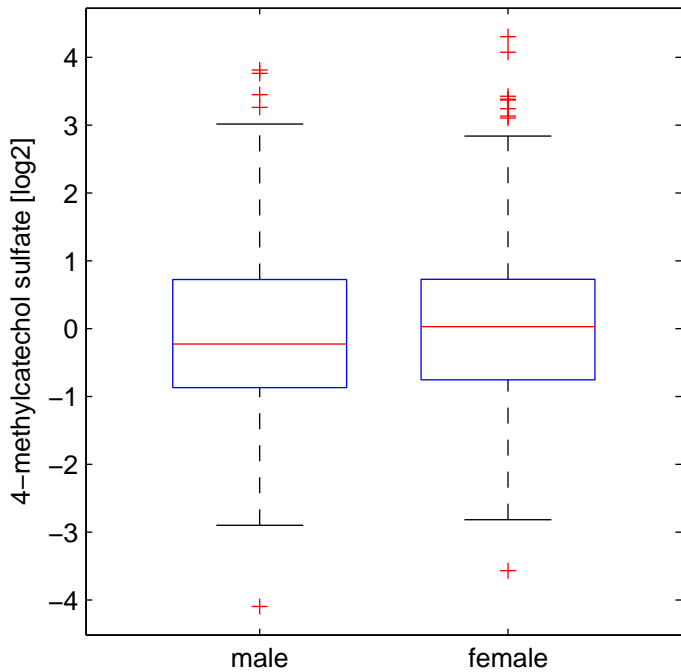

p-val: 1.00e-004

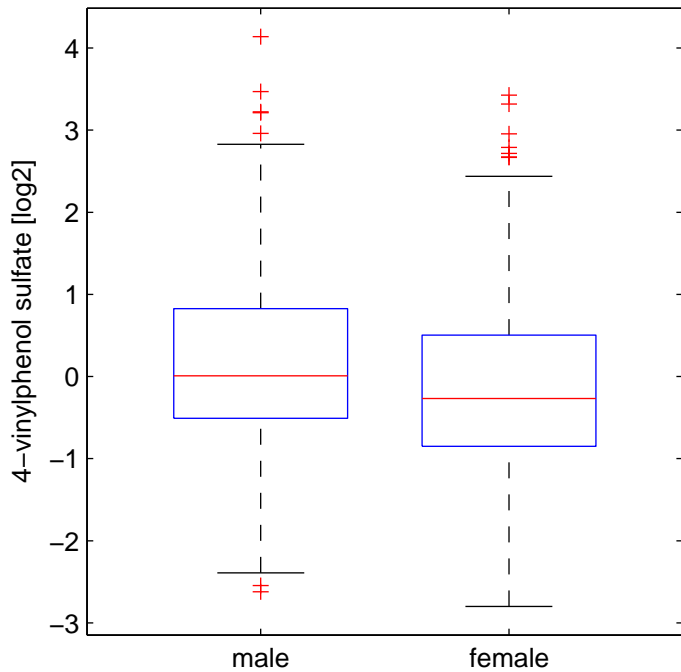



p-val: 5.89e-030

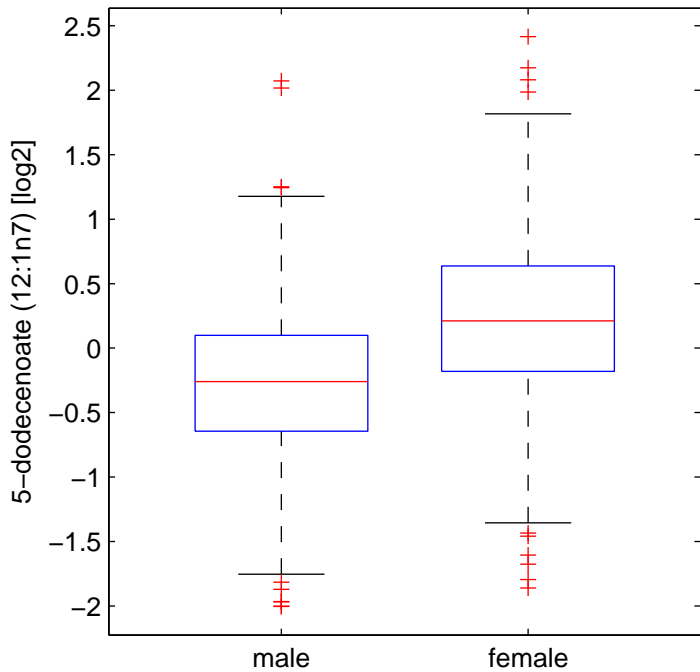

p-val: 9.41e-004

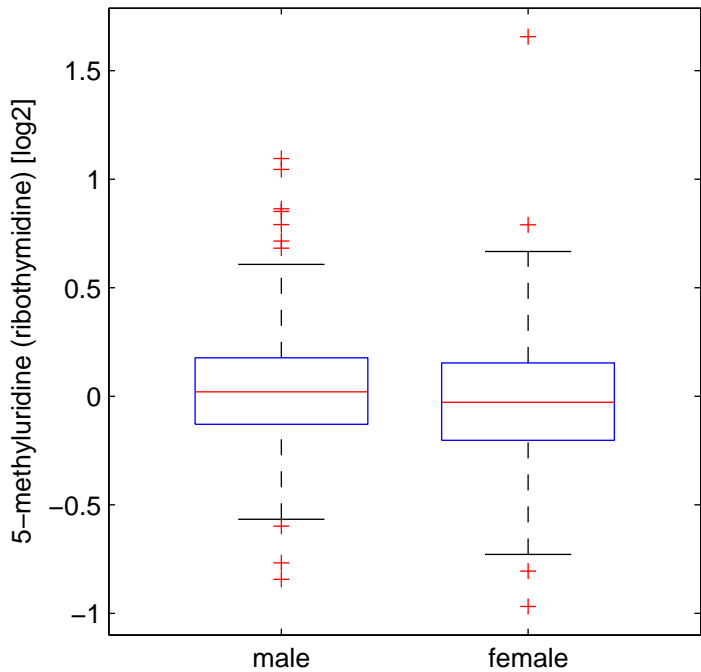

p-val: 6.49e-016

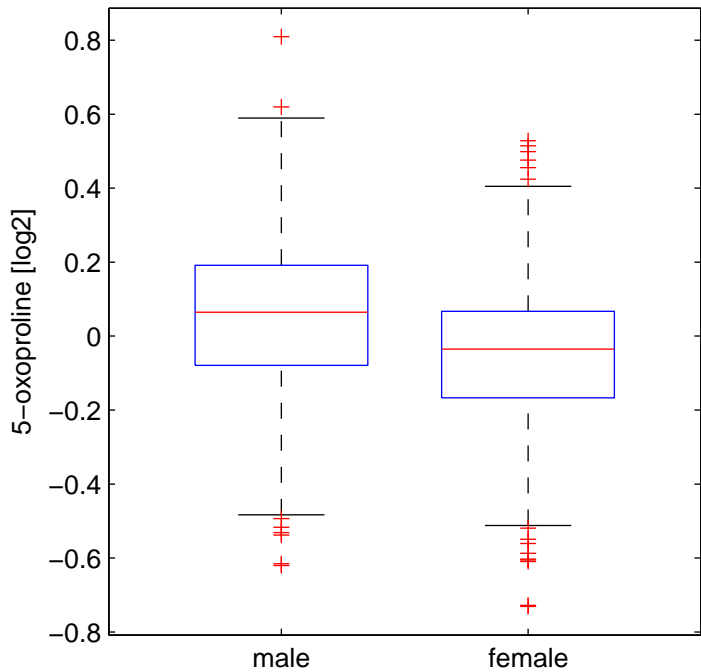

p-val: 9.53e-002

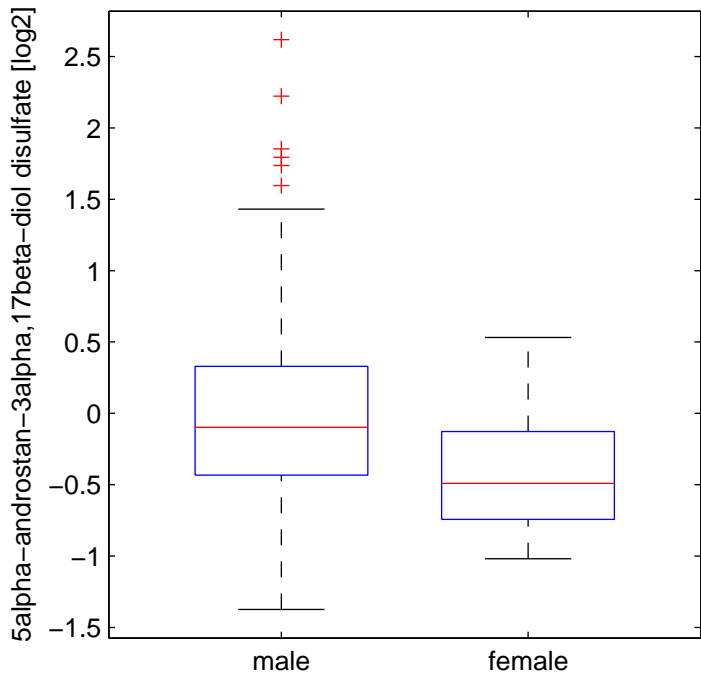

p-val: 1.06e-001

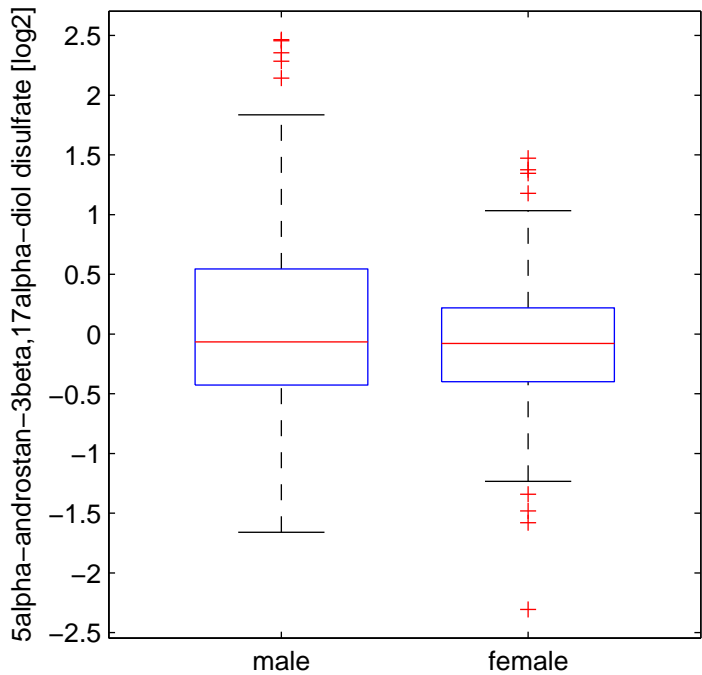

p-val: 8.54e-072

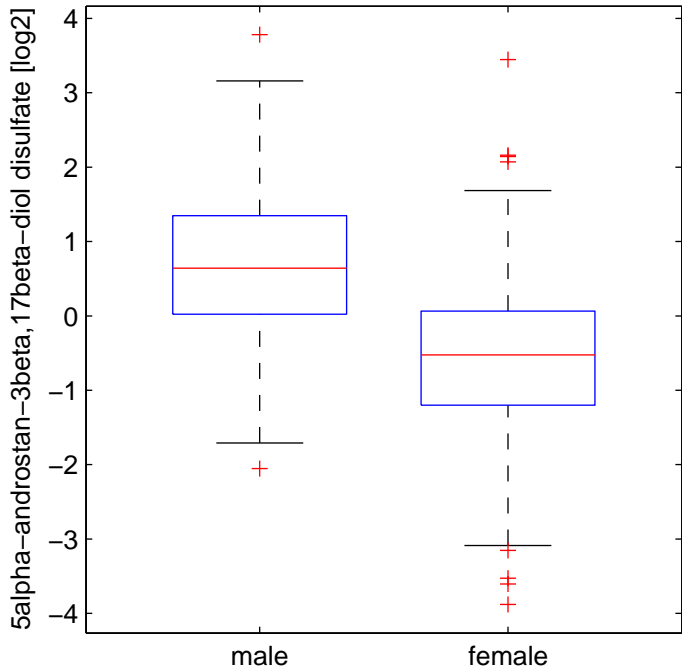

p-val: 5.02e-006

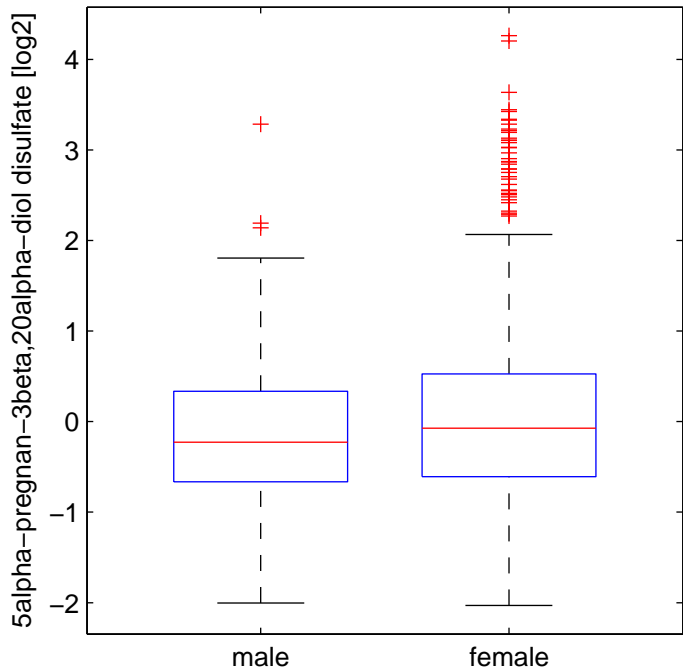

7- $\alpha$ -hydroxy-3-oxo-4-cholestenoate (7-Hoca) [log2]

p-val: 8.25e-005

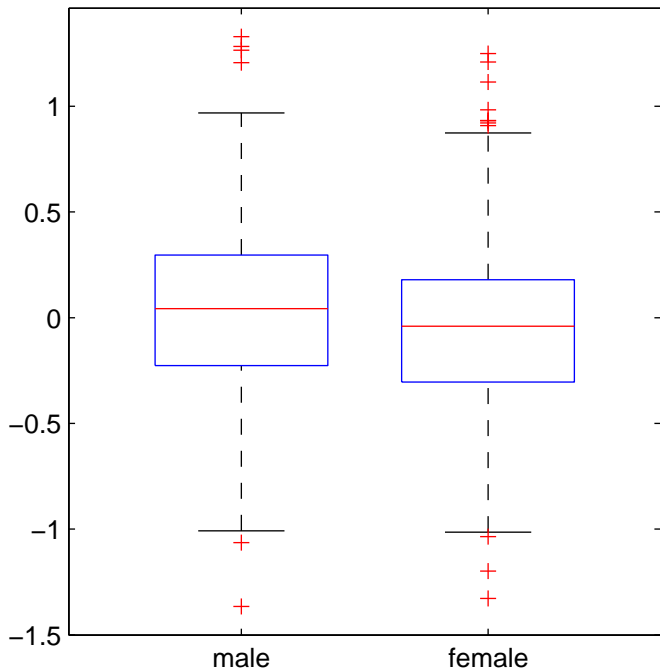



p-val: 4.68e-002

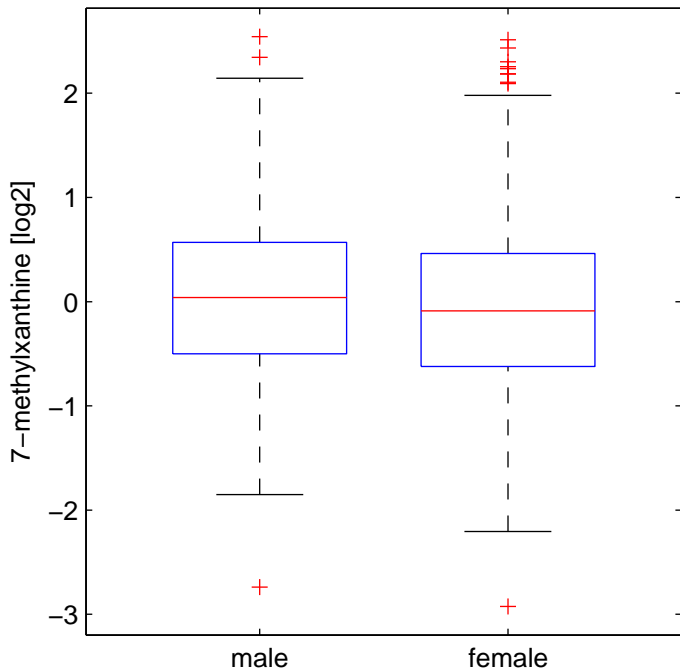

p-val: 1.38e-001

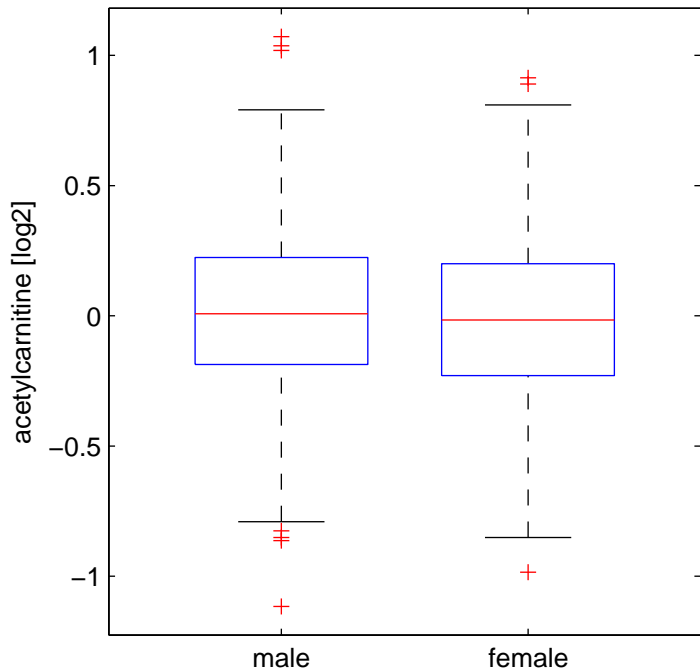

p-val: 4.17e-002

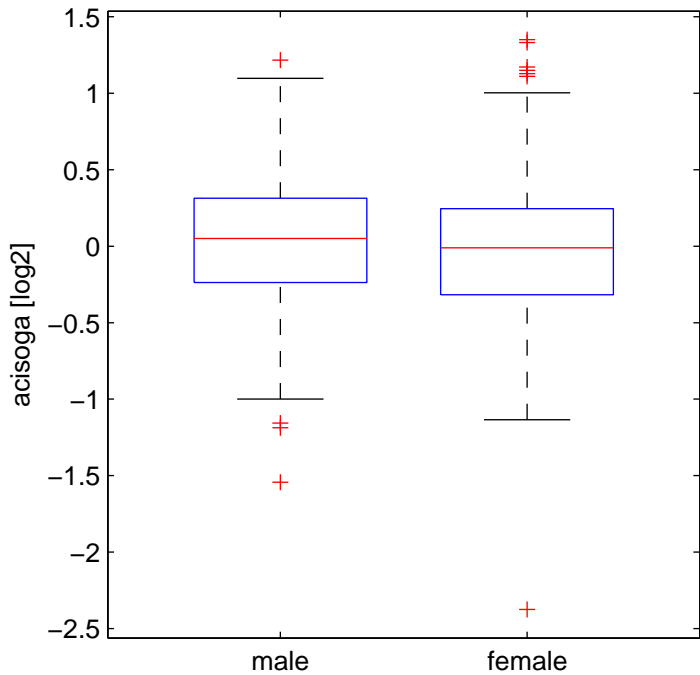

p-val: 4.48e-001

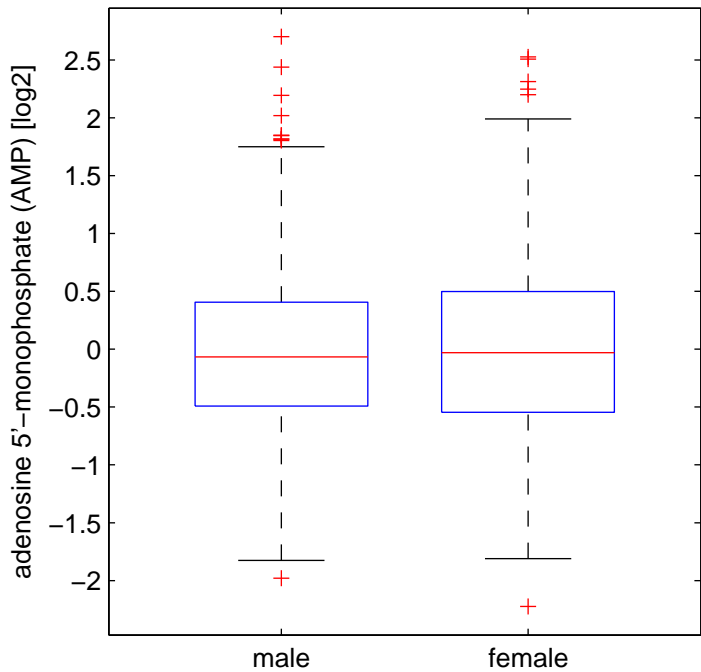



p-val: 2.50e-001

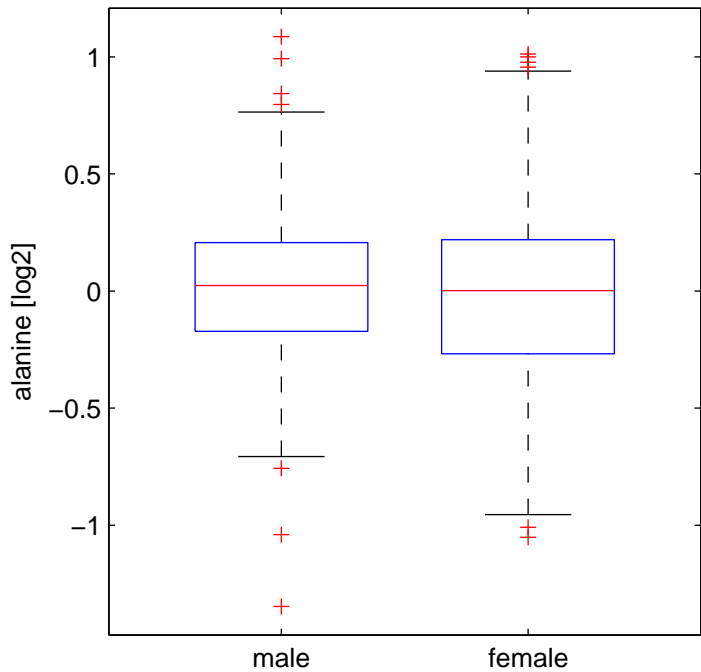

p-val: 1.27e-007

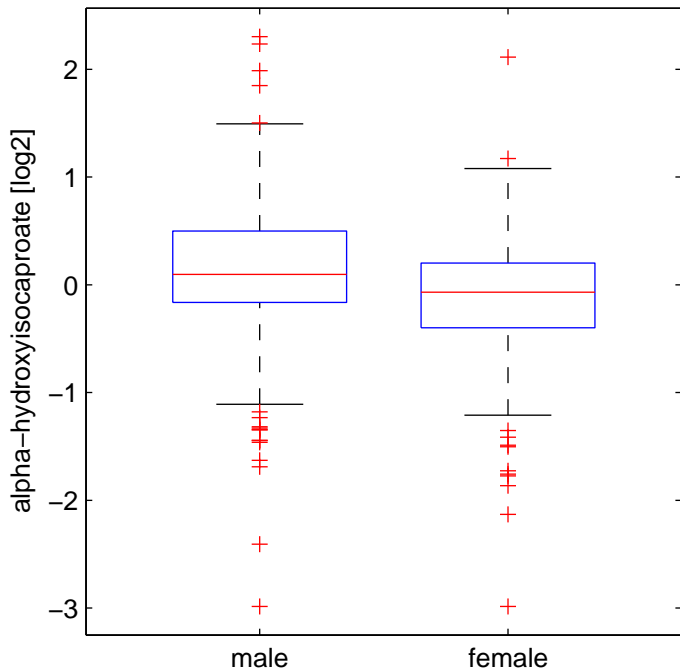

p-val: 2.21e-043

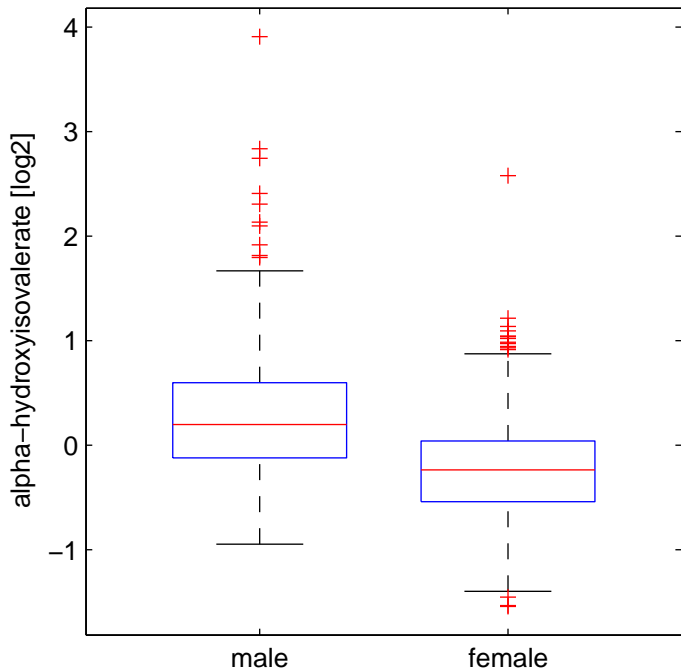



p-val: 1.52e-009

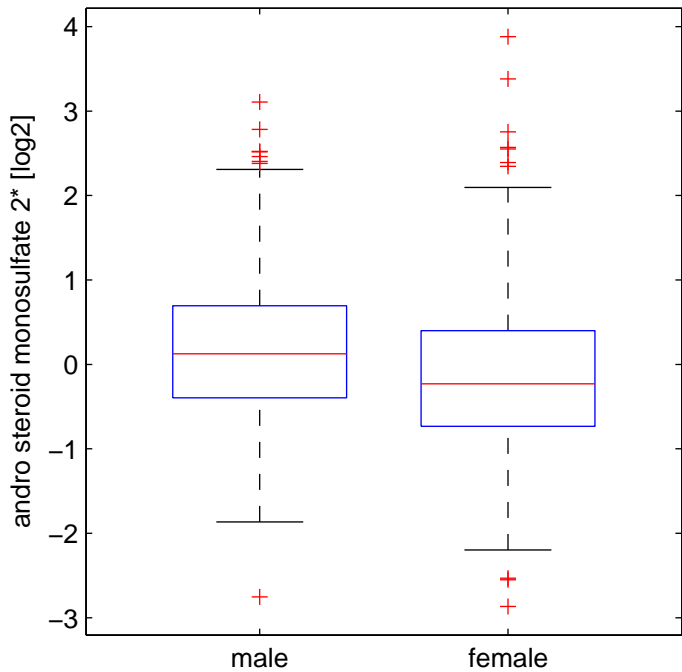

p-val: 1.17e-010

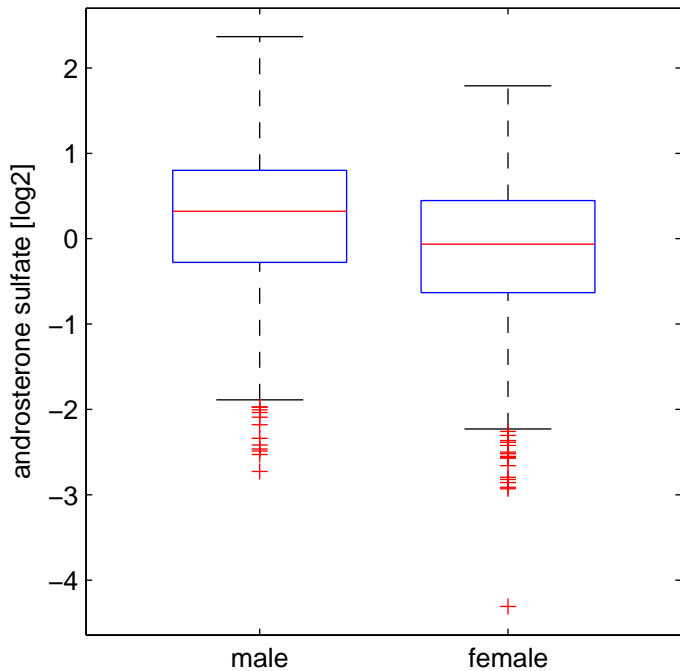

p-val: 7.98e-001

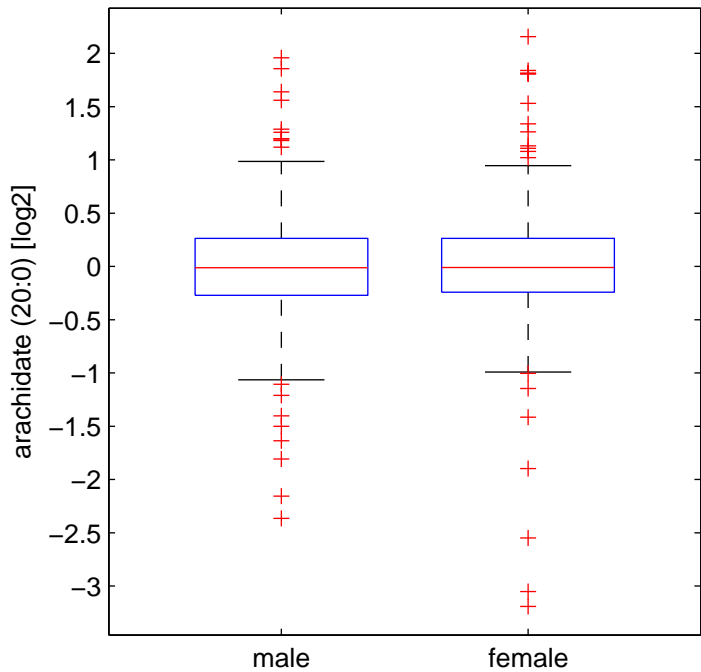

p-val: 6.36e-005

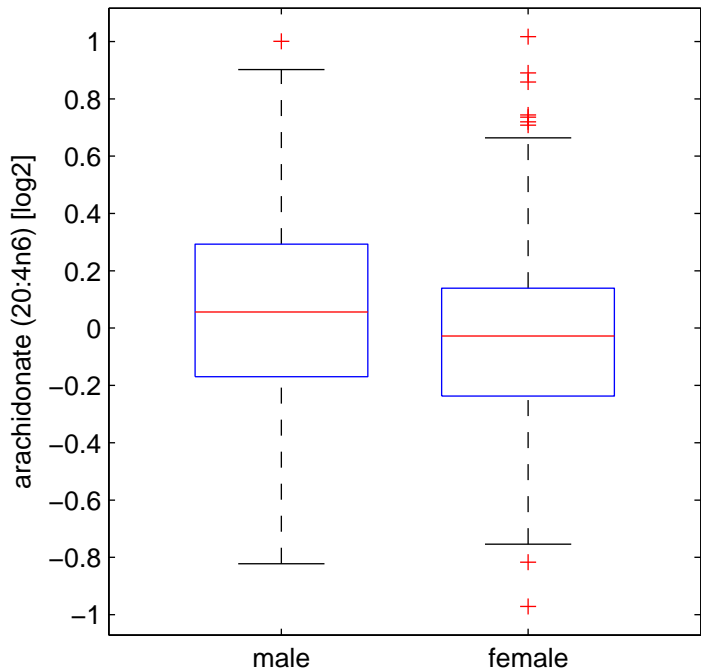

p-val: 8.73e-002

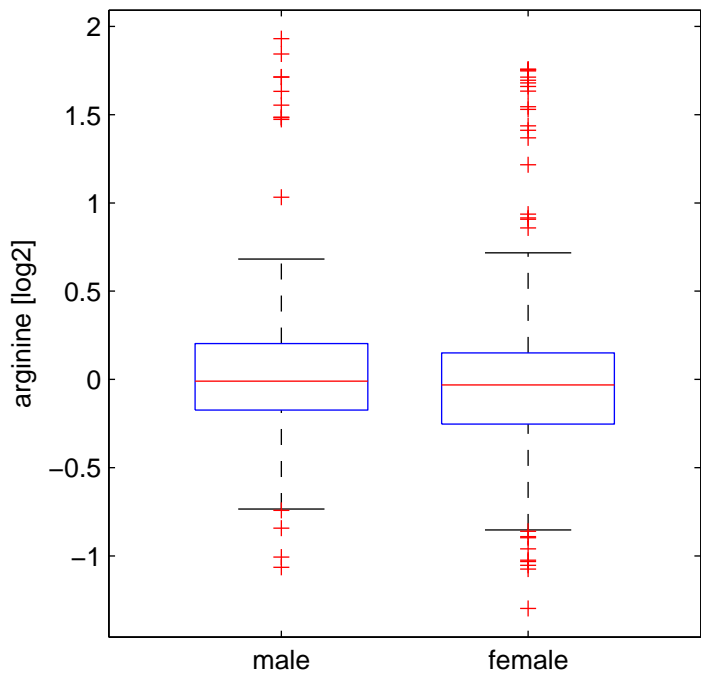

p-val: 3.80e-001

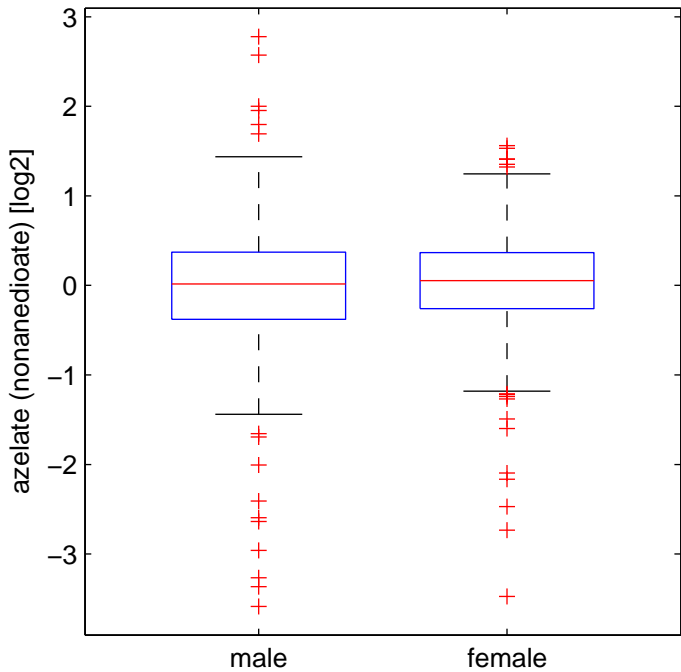

p-val: 1.68e-024

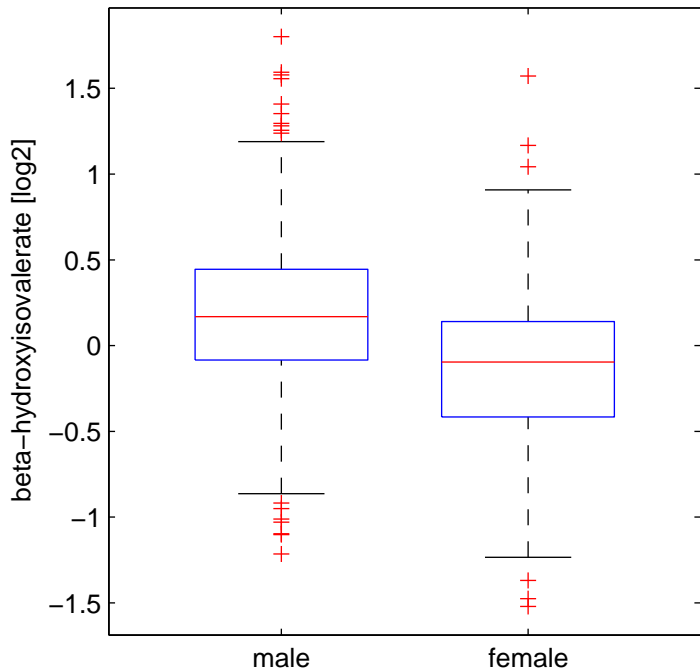

p-val: 9.03e-045

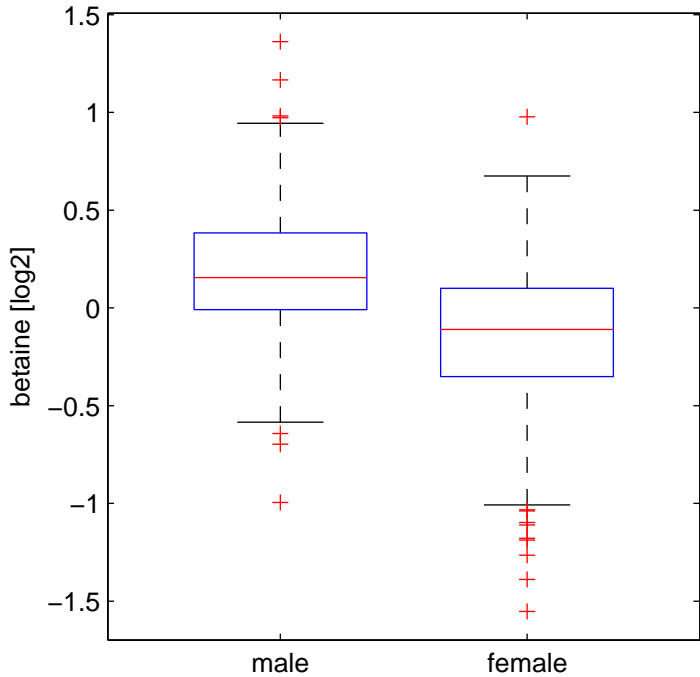



p-val: 3.04e-002

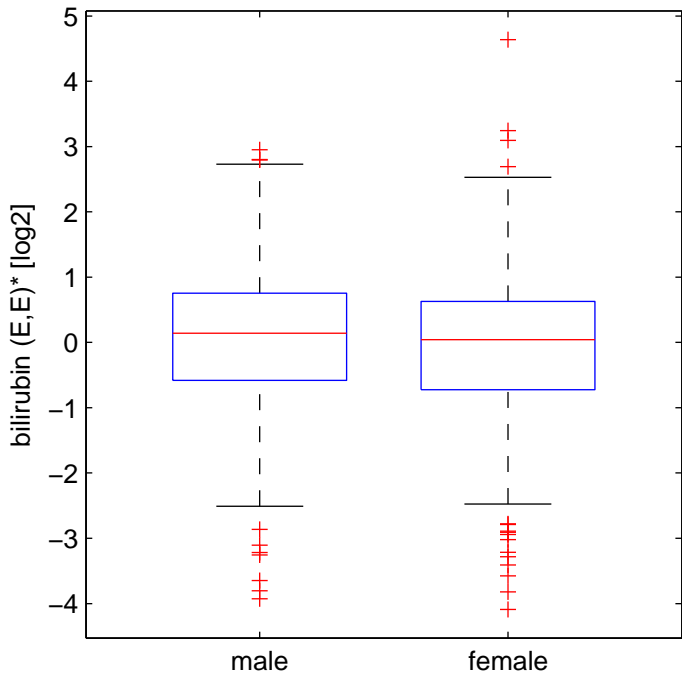

p-val: 6.40e-001

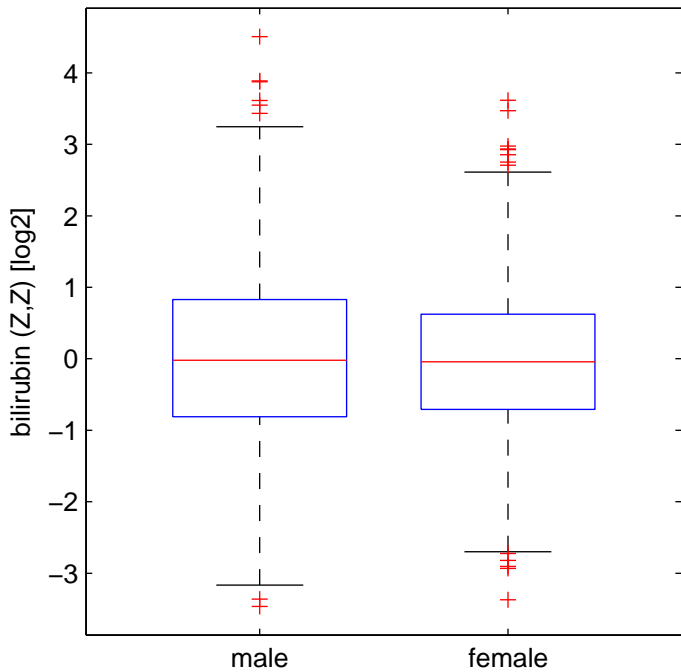

p-val: 8.38e-017

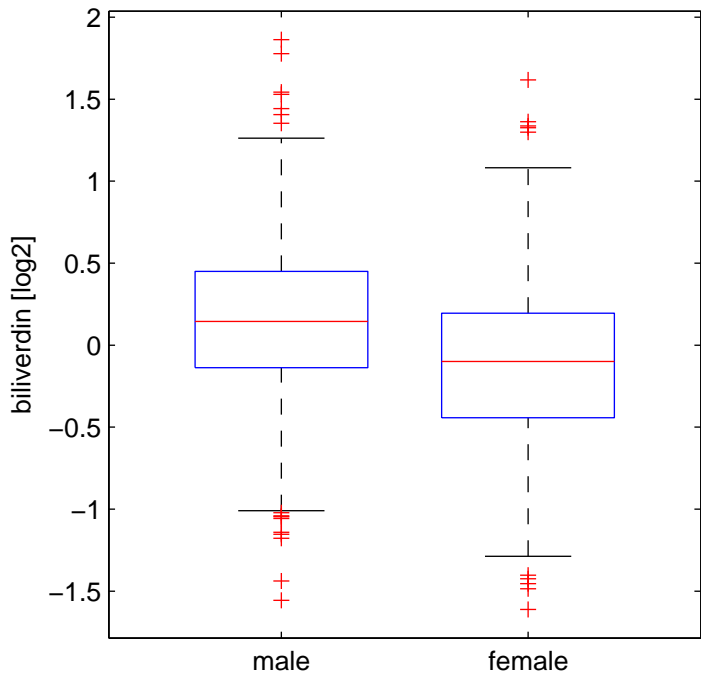

p-val: 1.31e-009

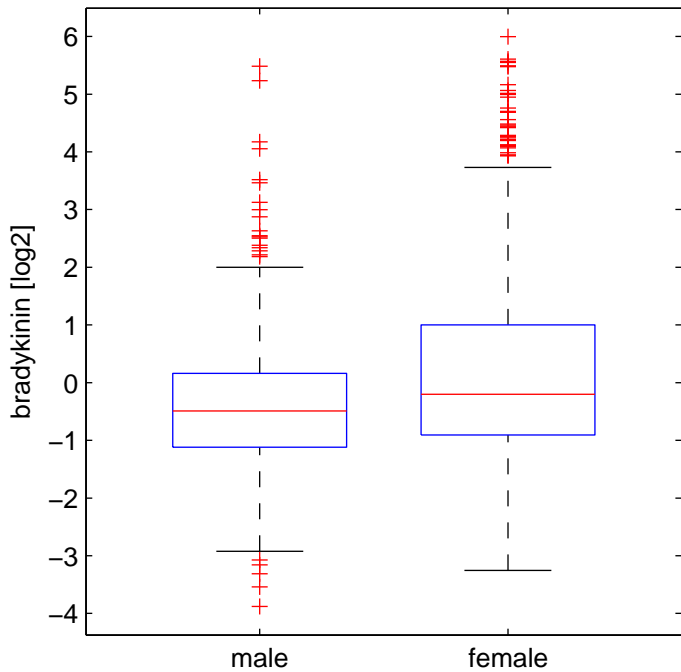

p-val: 2.44e-006

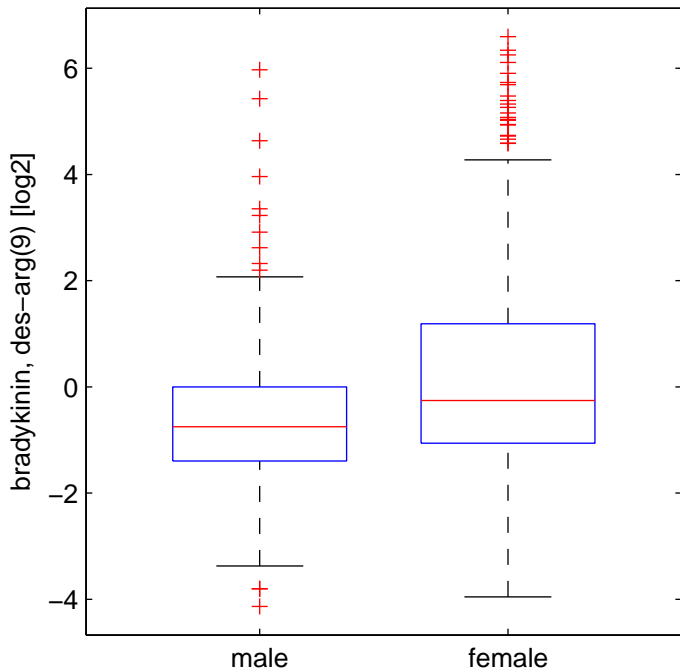

p-val: 6.63e-004

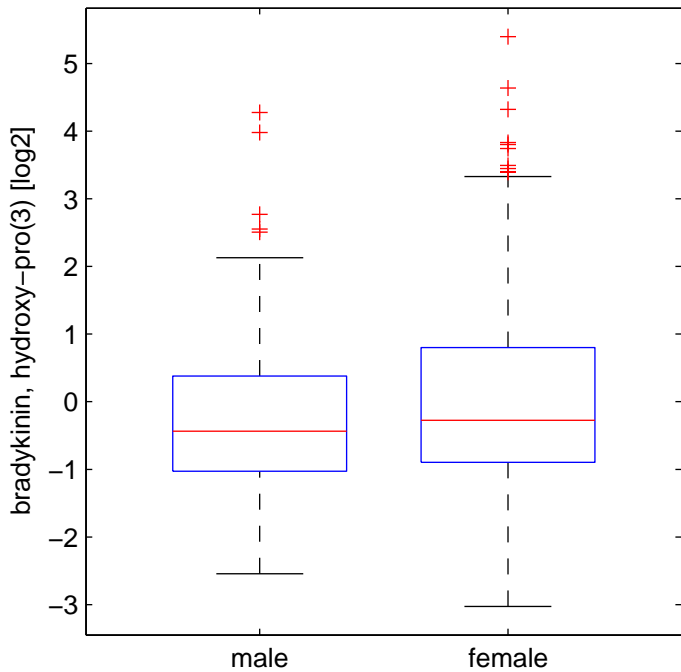

p-val: 3.17e-007

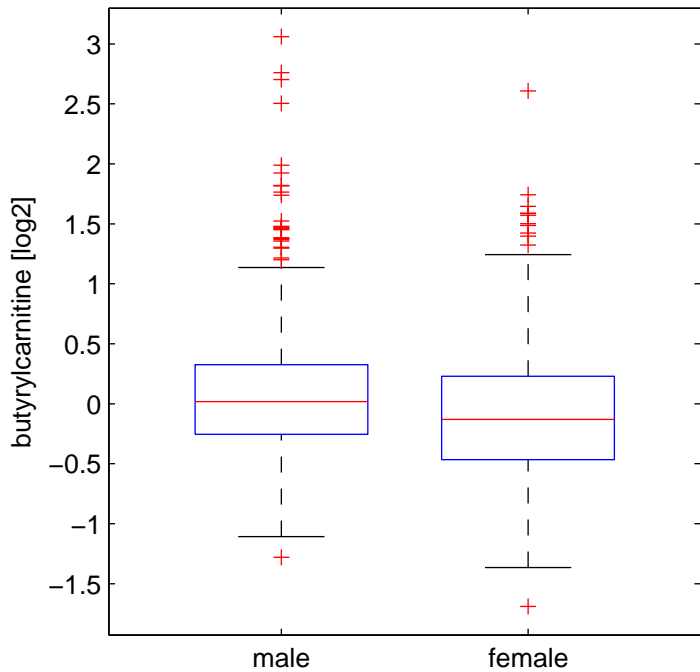

p-val: 2.88e-003

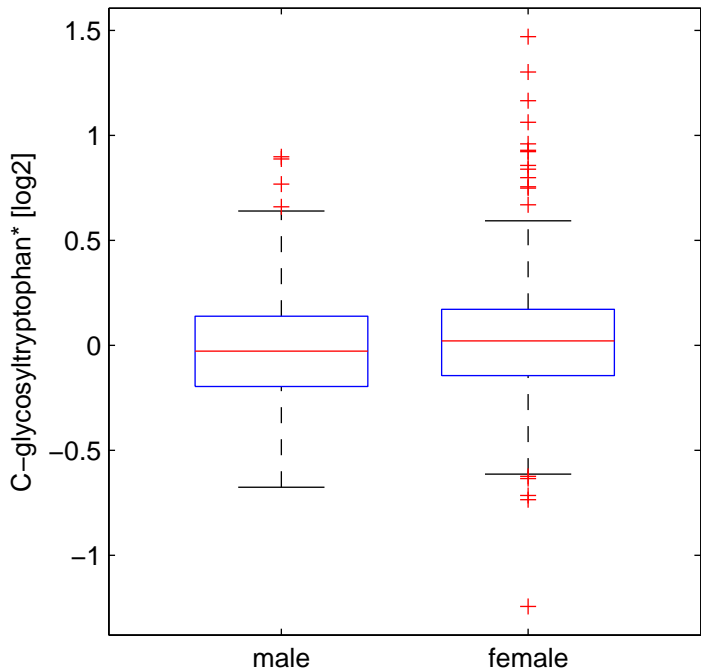



p-val: 1.14e-003

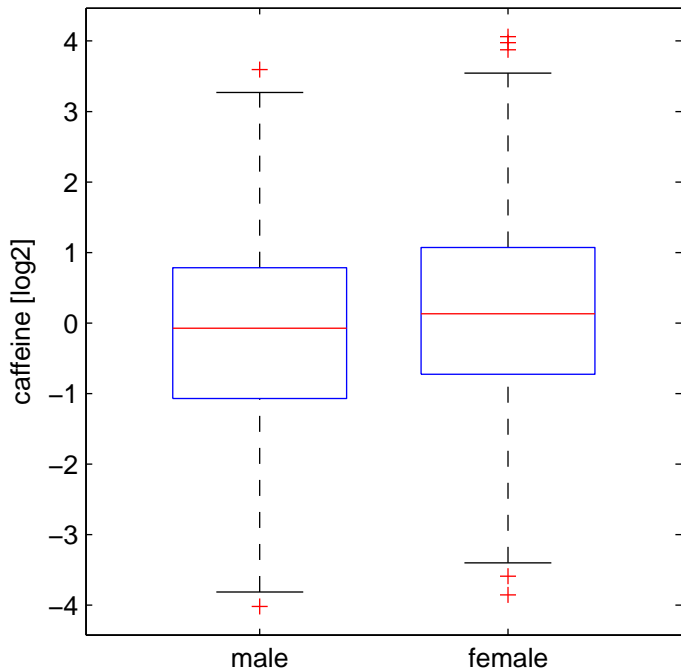

p-val: 1.81e-005

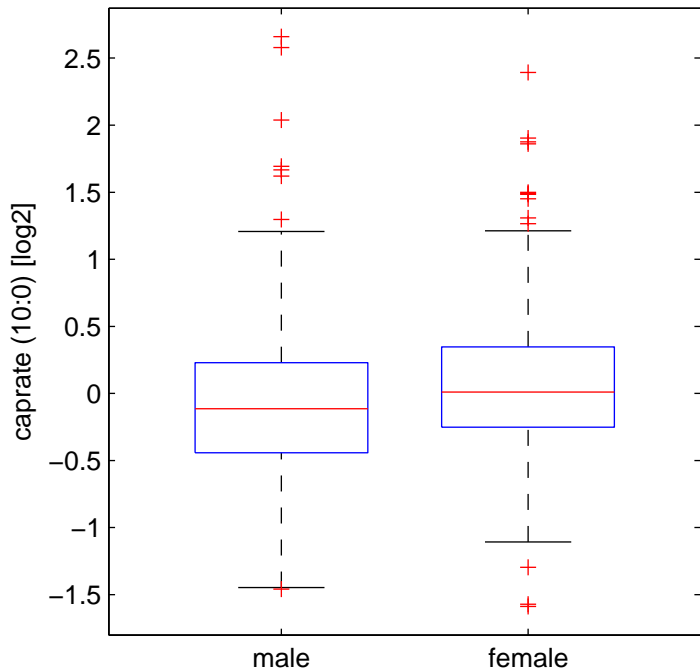



p-val: 3.32e-002

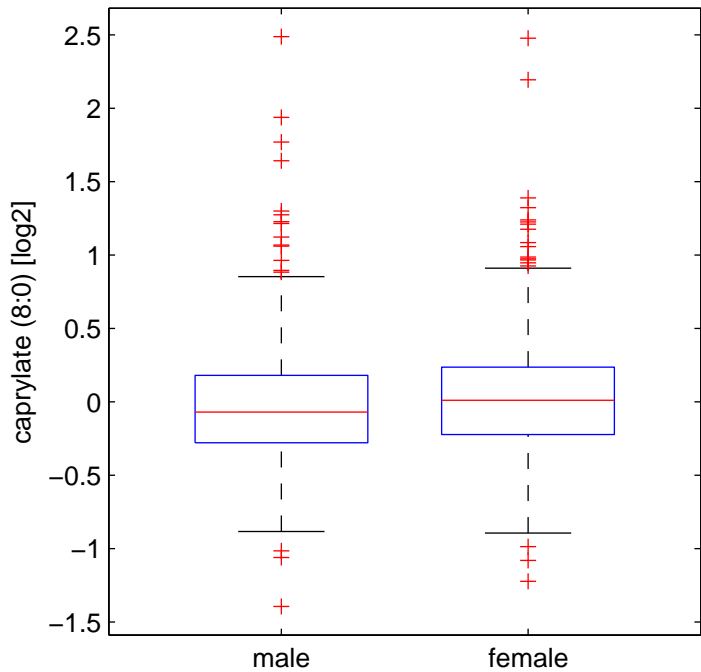

p-val: 1.55e-010

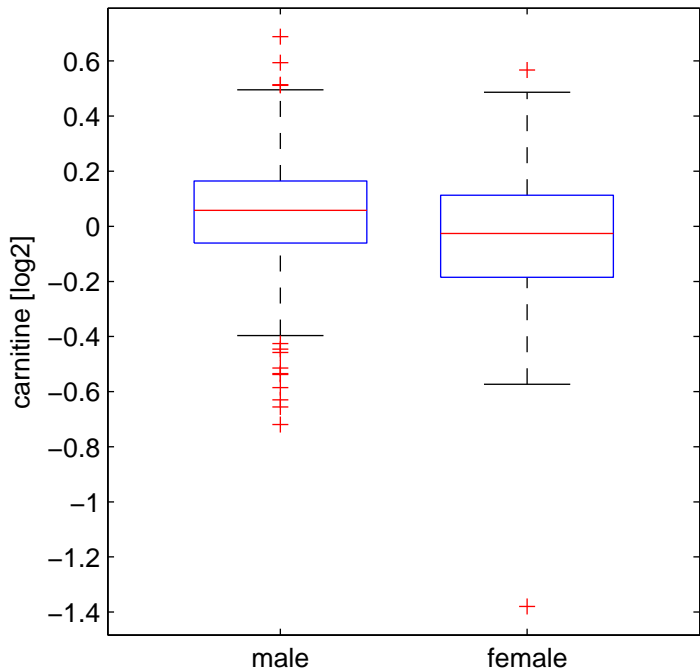

p-val: 6.12e-001

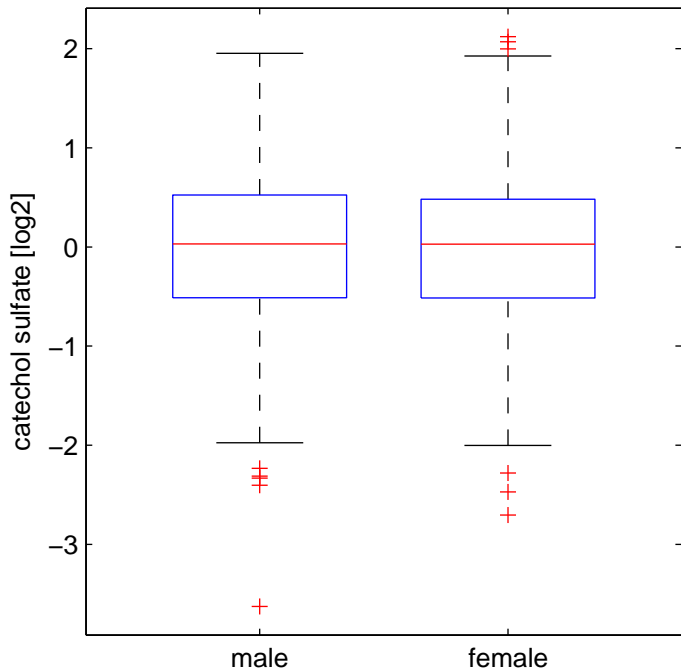

p-val: 3.80e-006

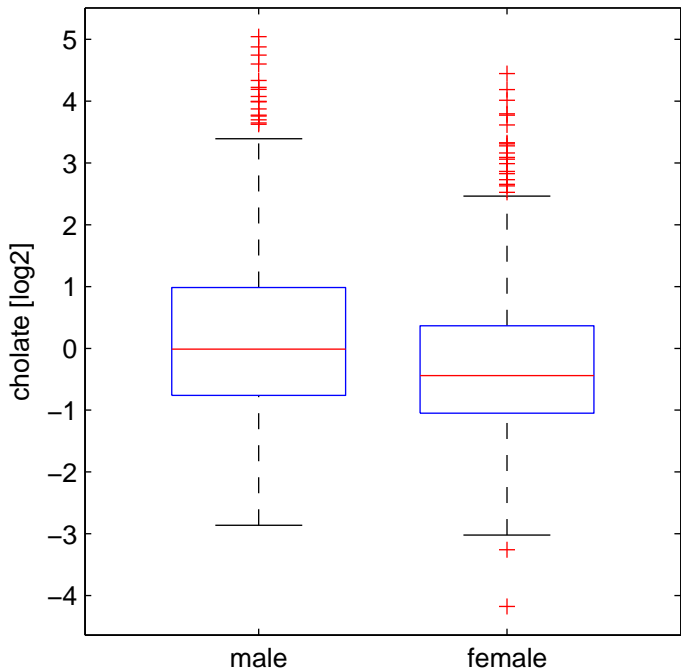

p-val: 6.40e-003

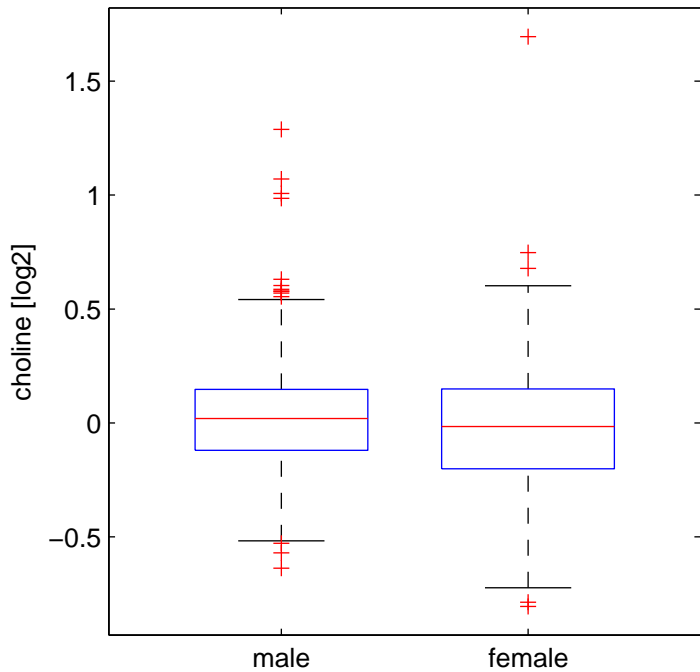



p-val: 1.78e-005

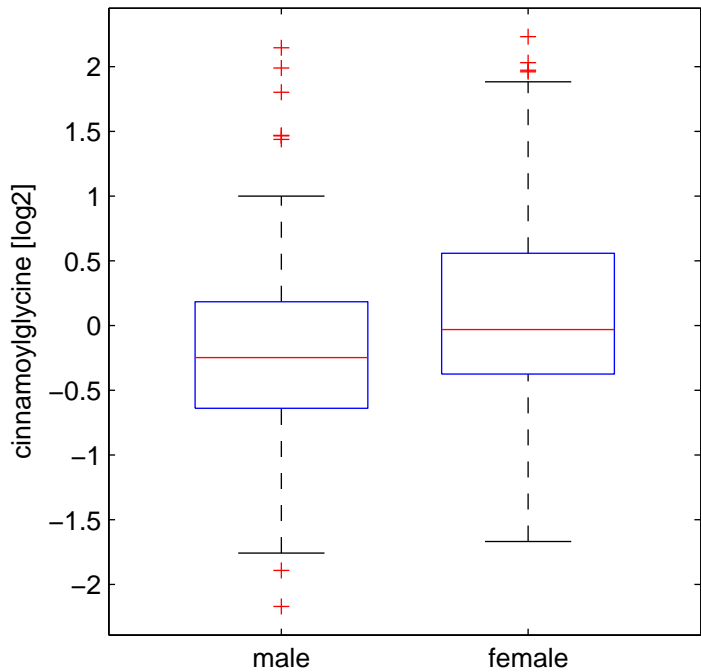

p-val: 3.11e-003

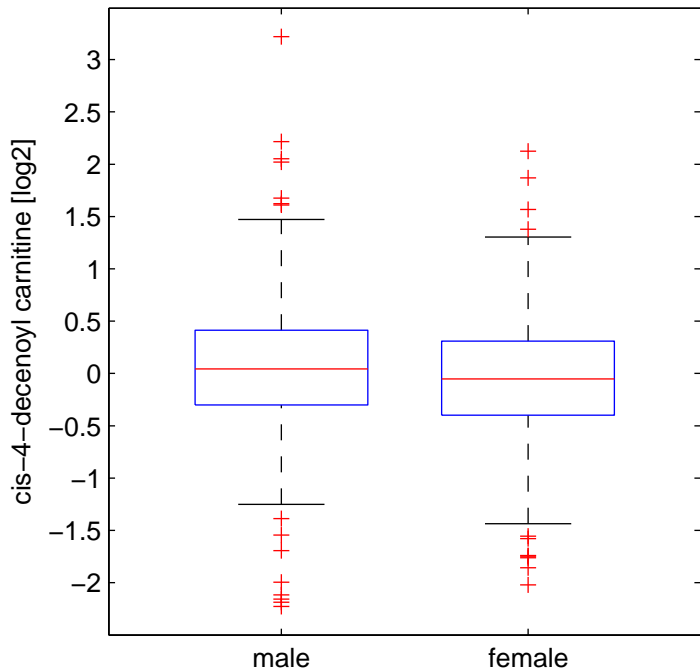

p-val: 1.88e-005

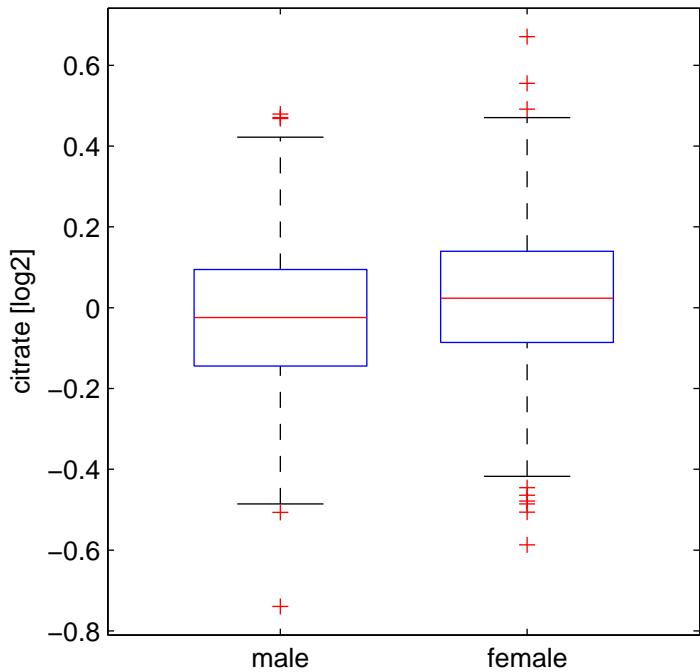

p-val: 7.00e-001

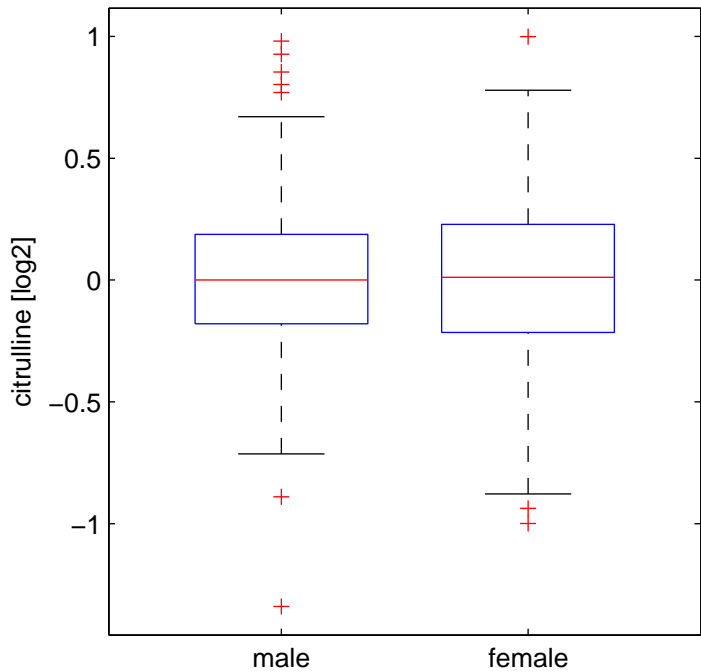

p-val: 4.49e-001

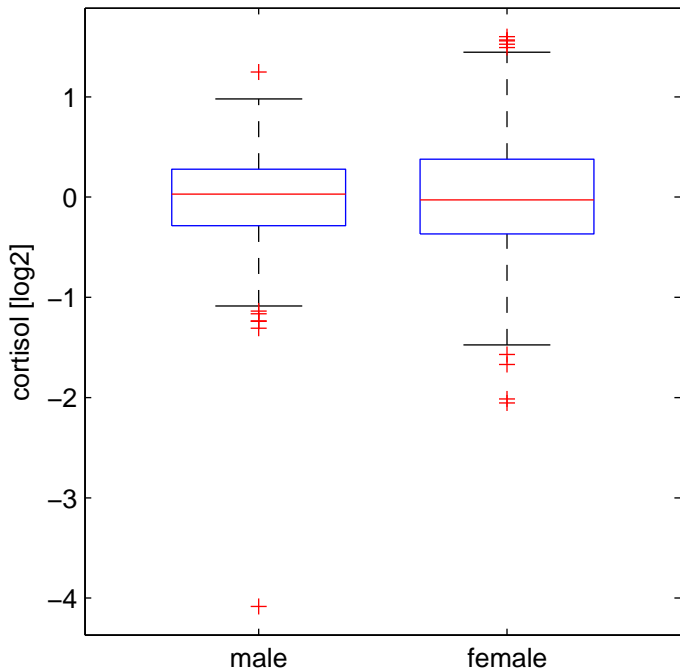

p-val: 2.66e-005

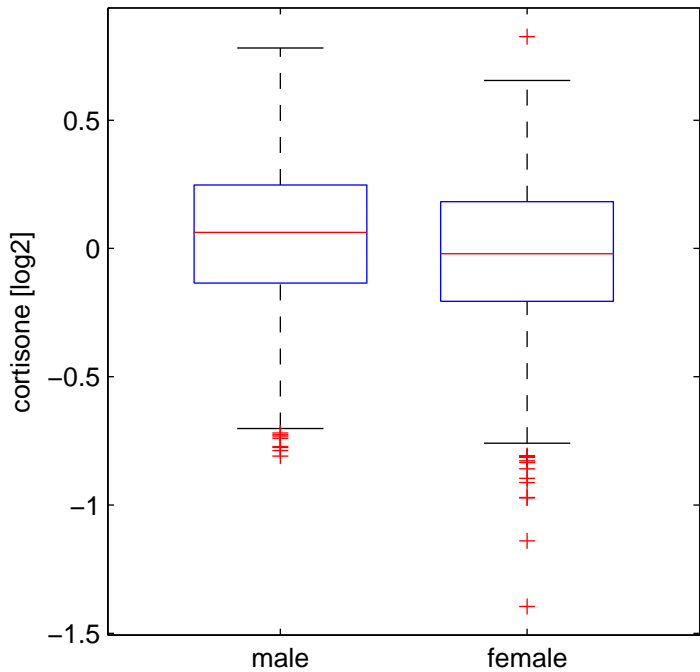

p-val: 5.87e-001

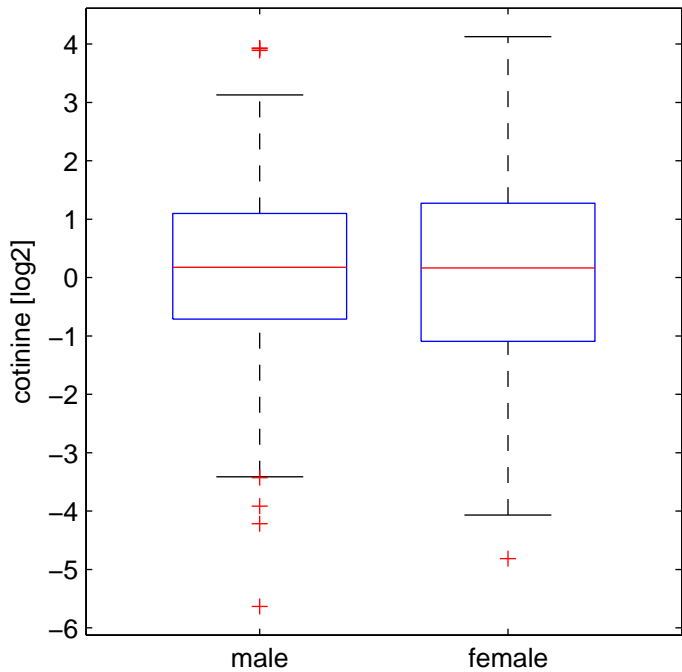

p-val: 8.74e-043

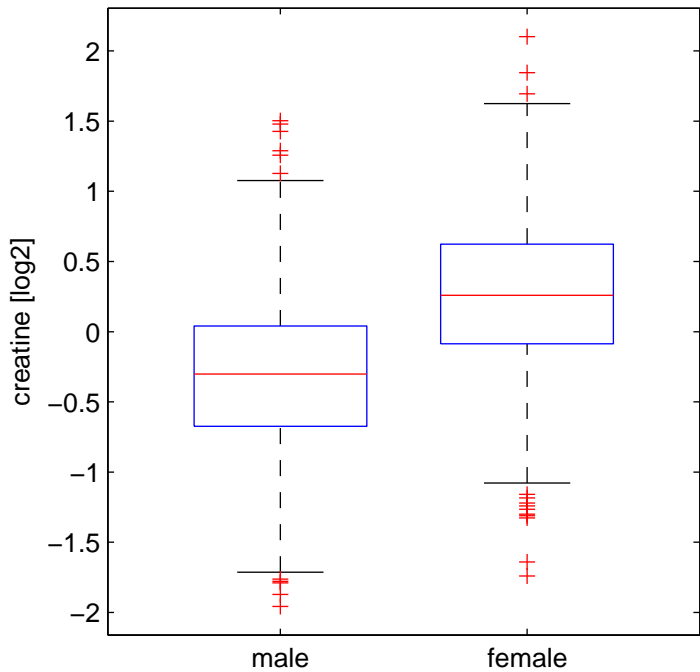



p-val:  $8.49e-027$

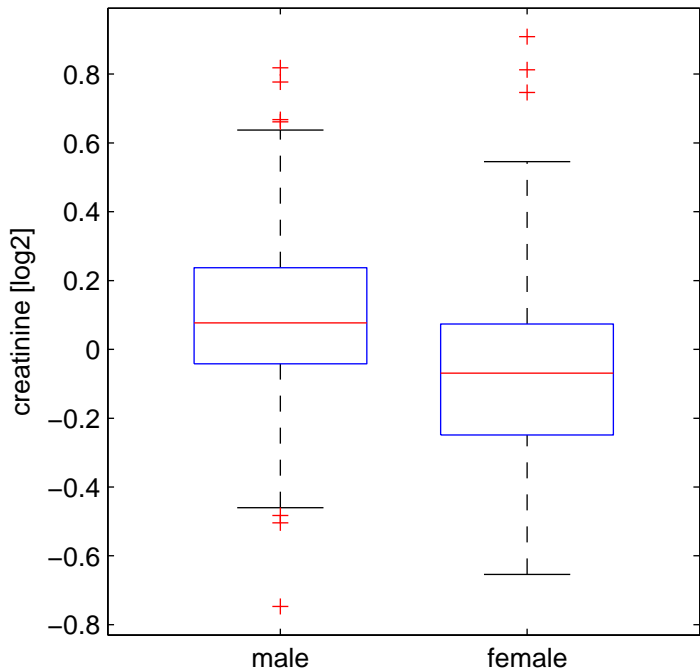

p-val: 1.26e-001

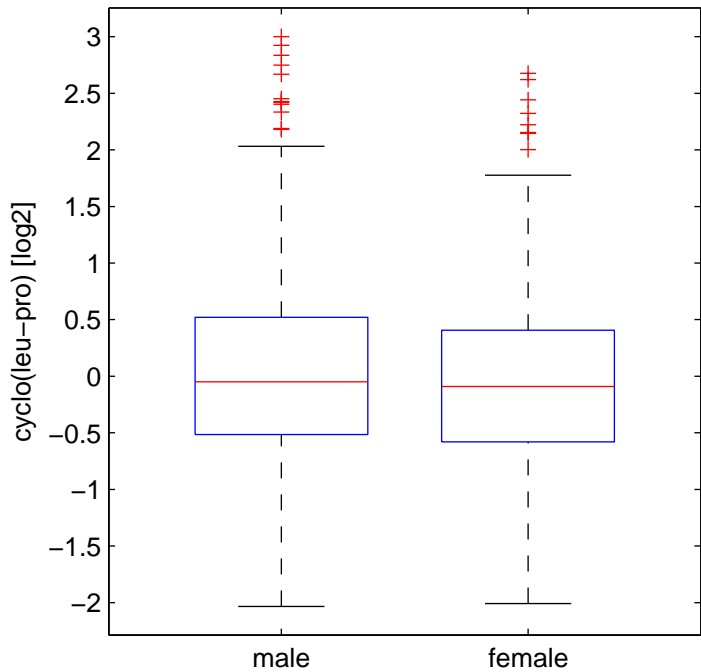

p-val: 1.95e-003

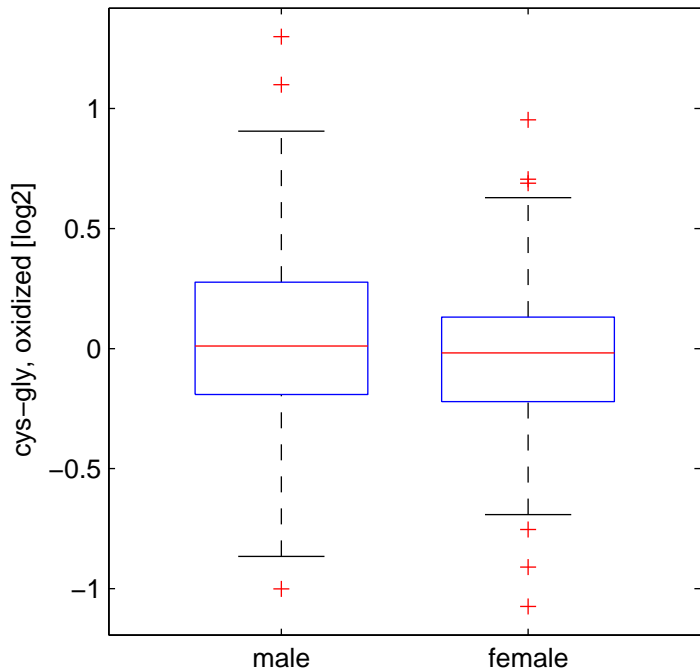

p-val: 5.76e-005

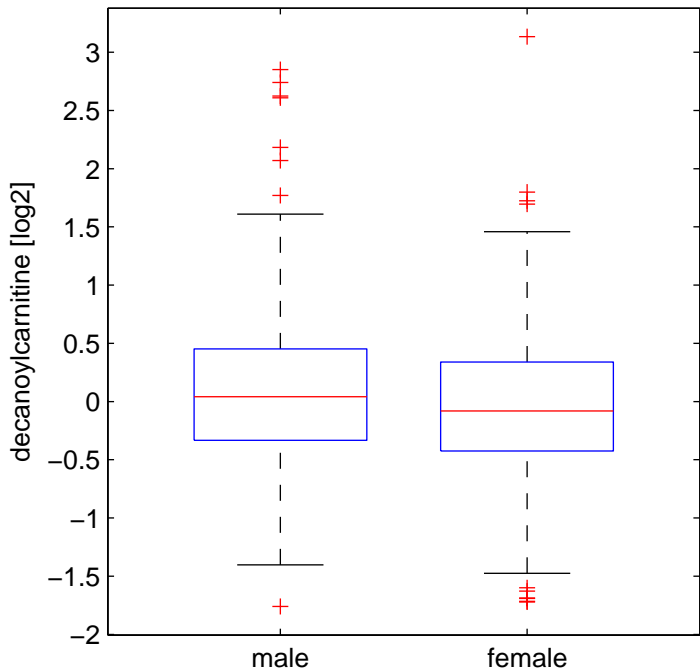

p-val: 4.46e-035

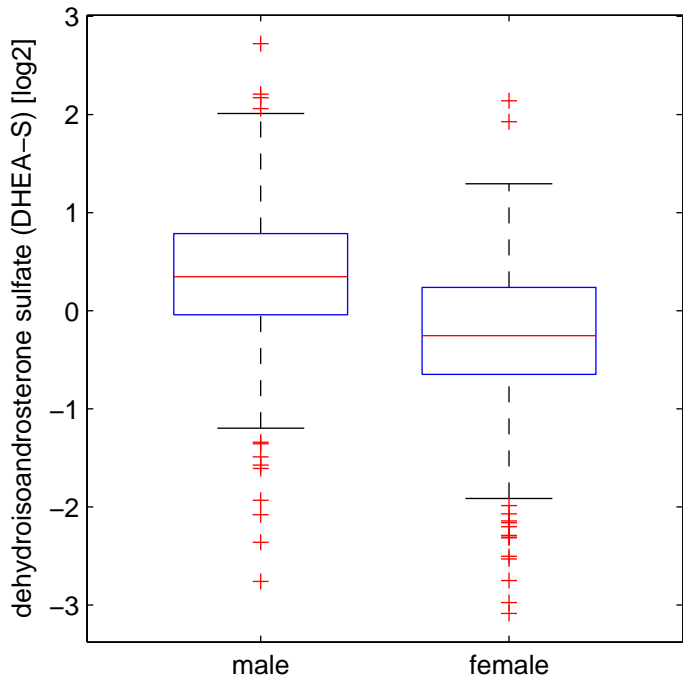

p-val: 2.86e-014

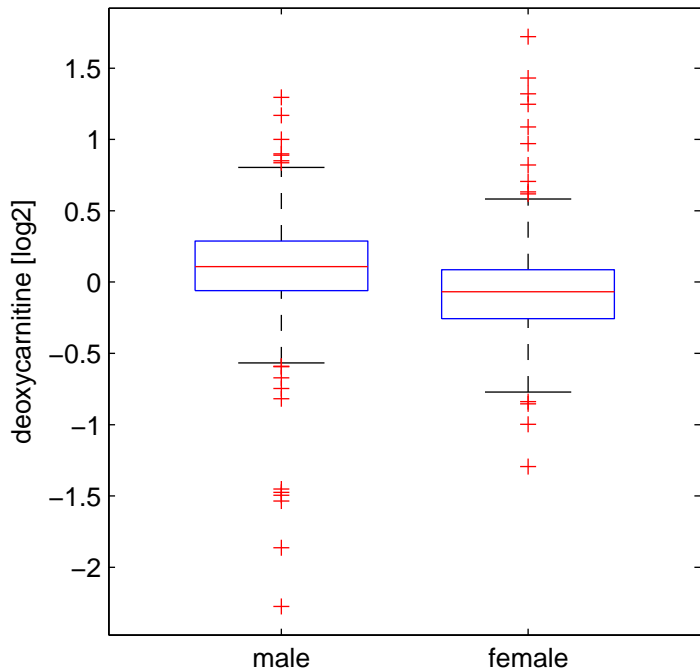

p-val: 8.04e-007

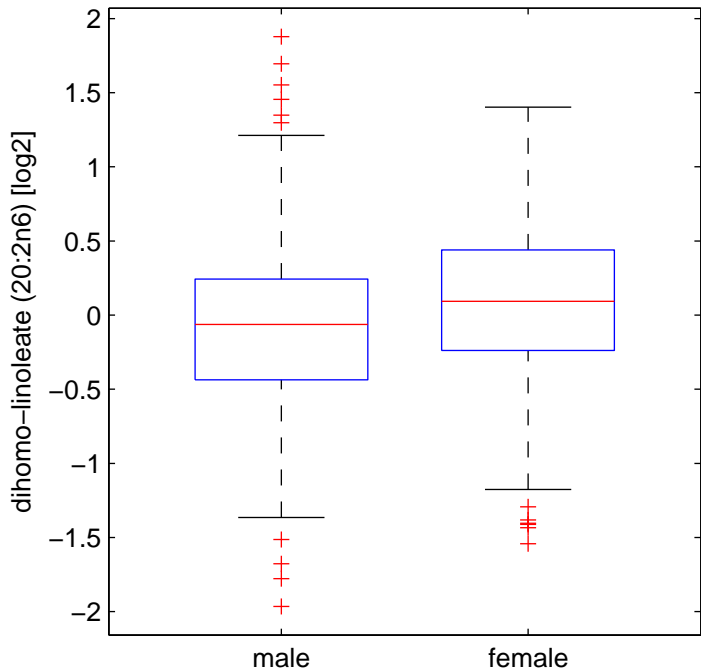

p-val: 3.02e-002

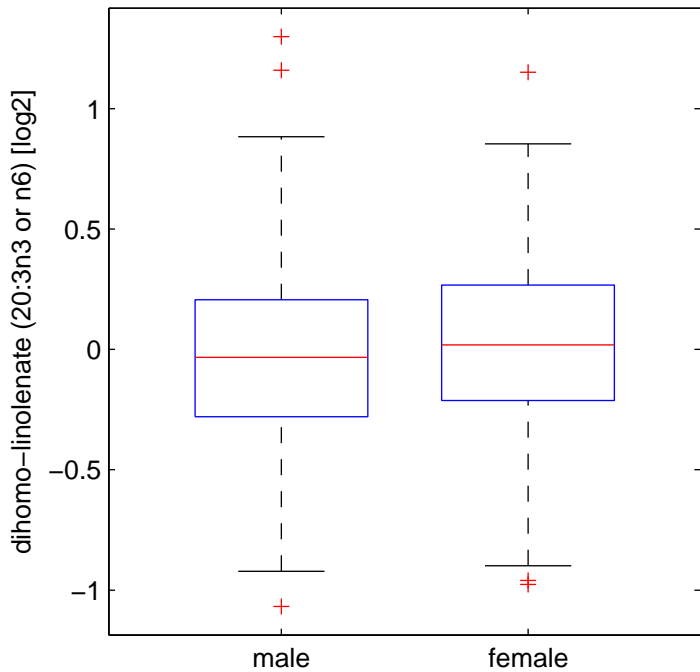



p-val: 3.00e-001

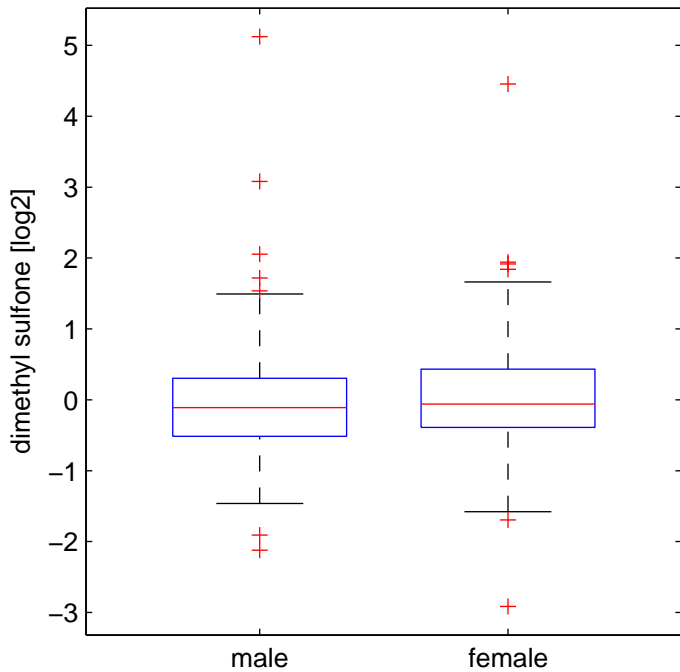

p-val: 6.62e-002

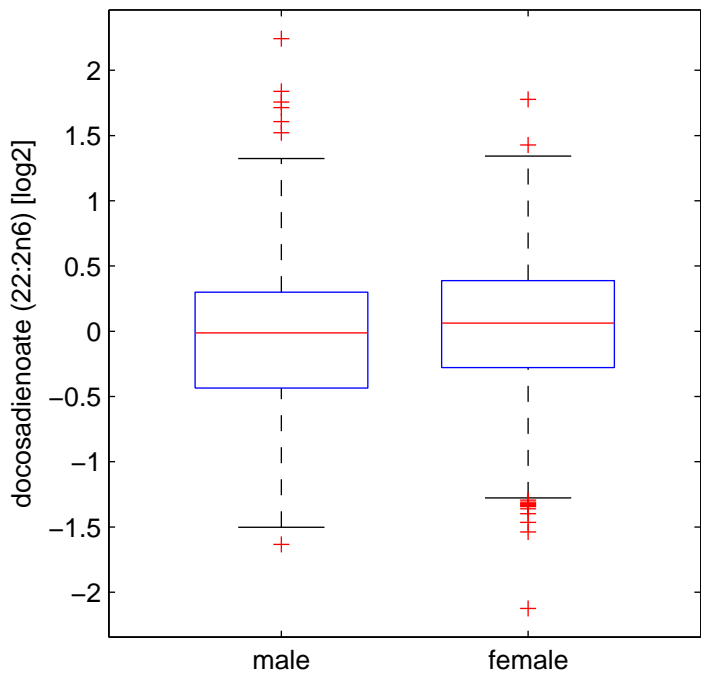

p-val: 3.40e-003

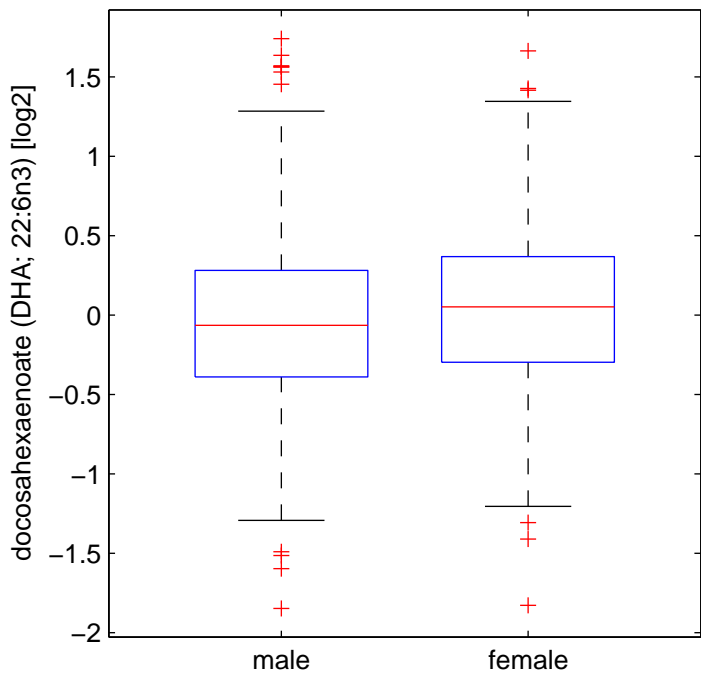

p-val: 5.08e-002

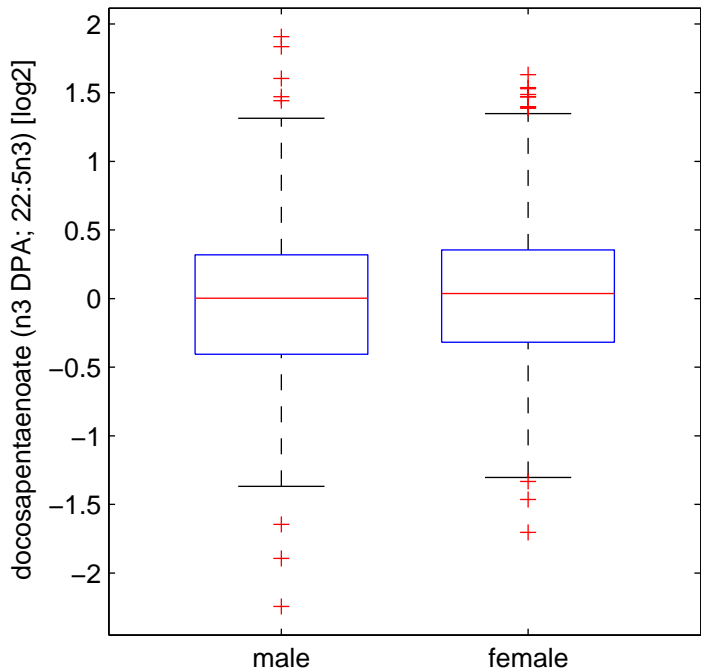

p-val: 5.06e-007

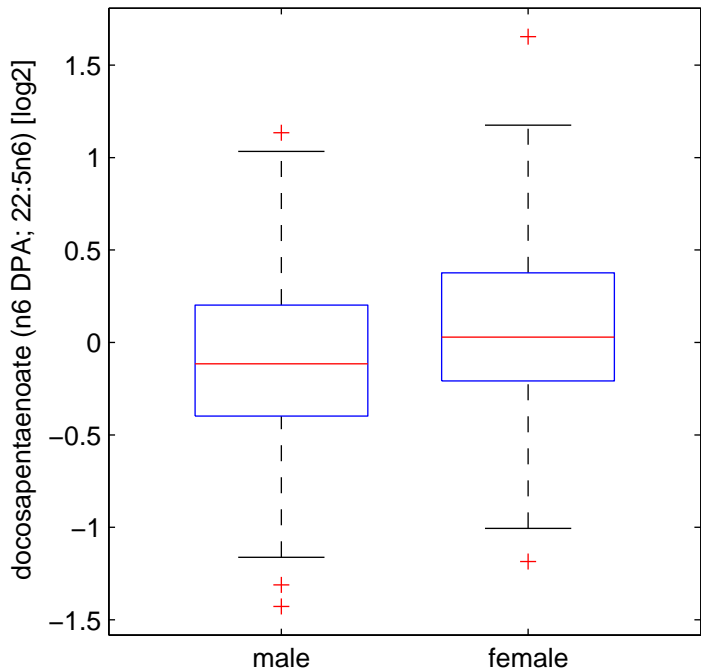

p-val: 7.18e-001

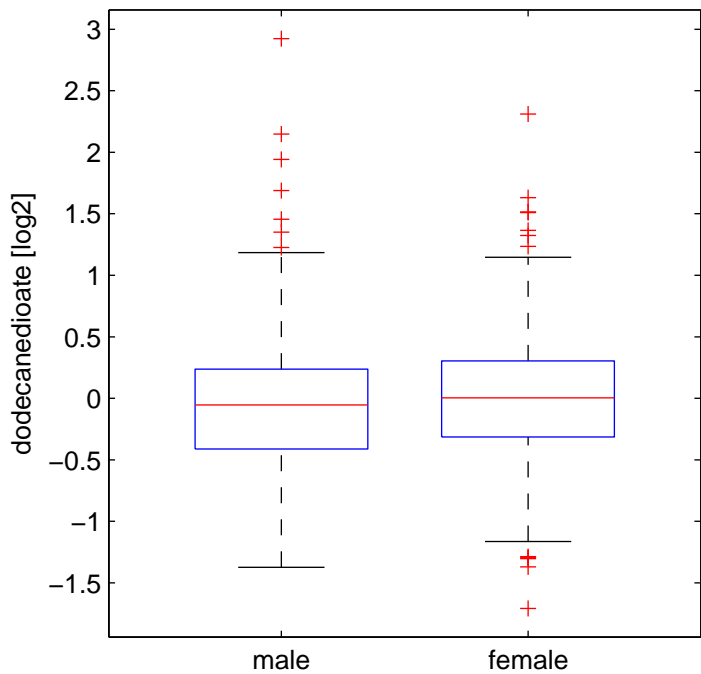

p-val: 4.46e-001

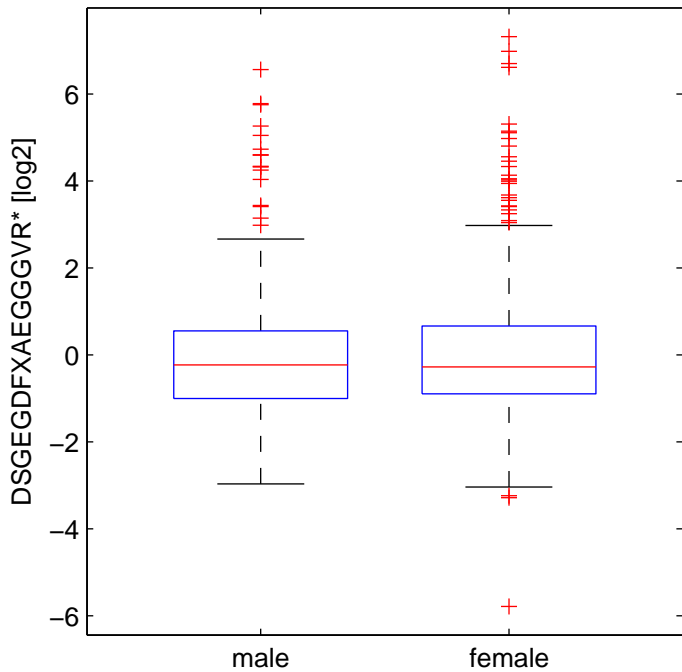

p-val: 6.30e-034

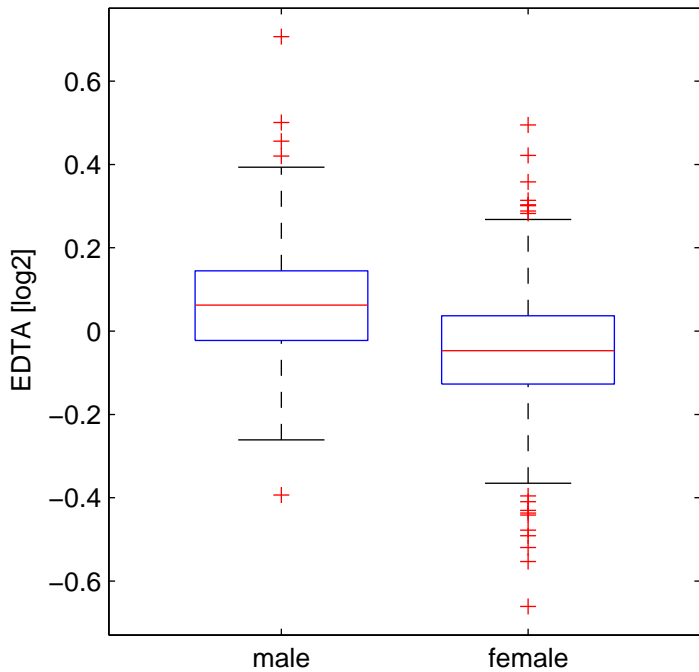



p-val: 2.41e-005

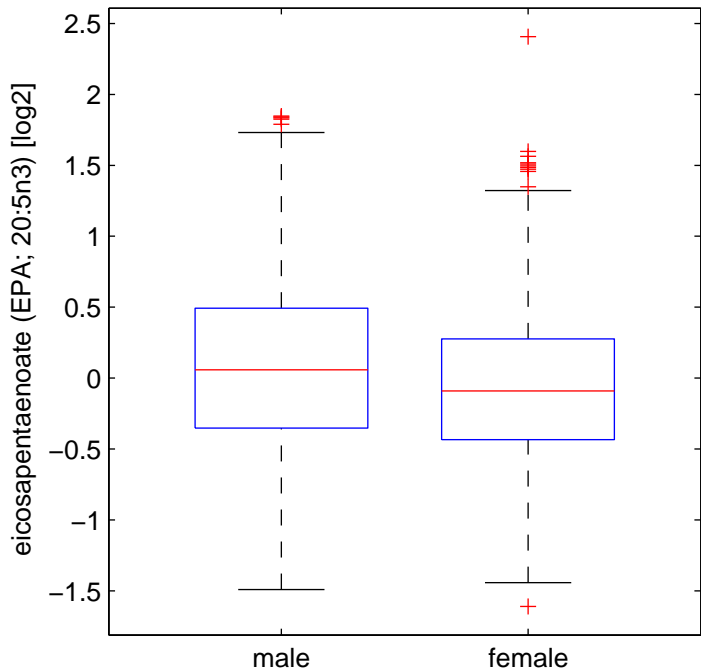

p-val: 5.88e-005

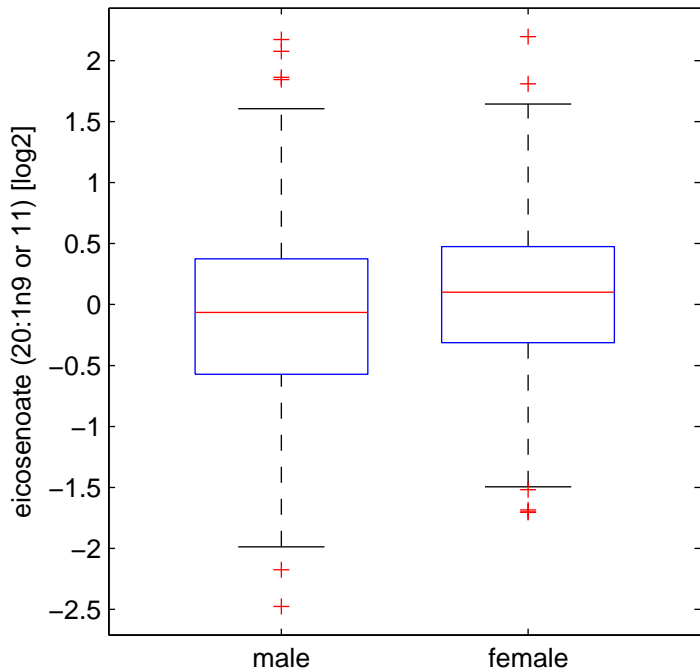

p-val: 5.53e-023

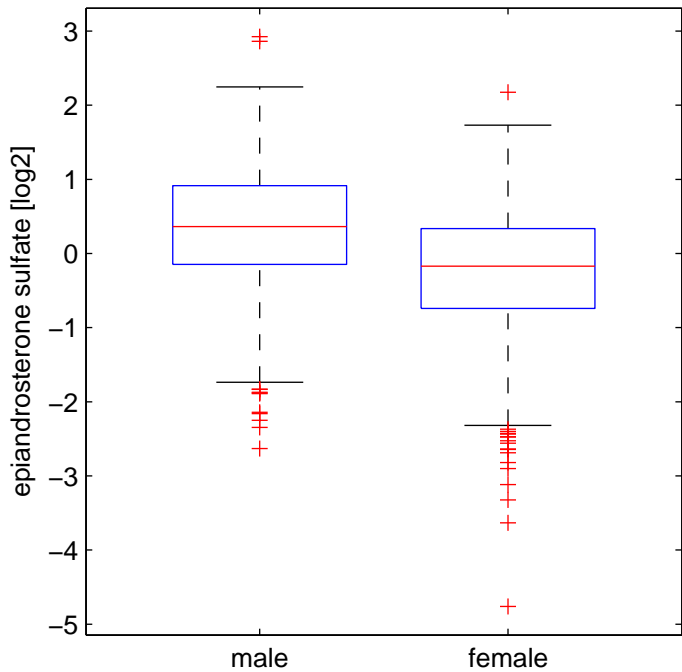

p-val: 5.73e-001

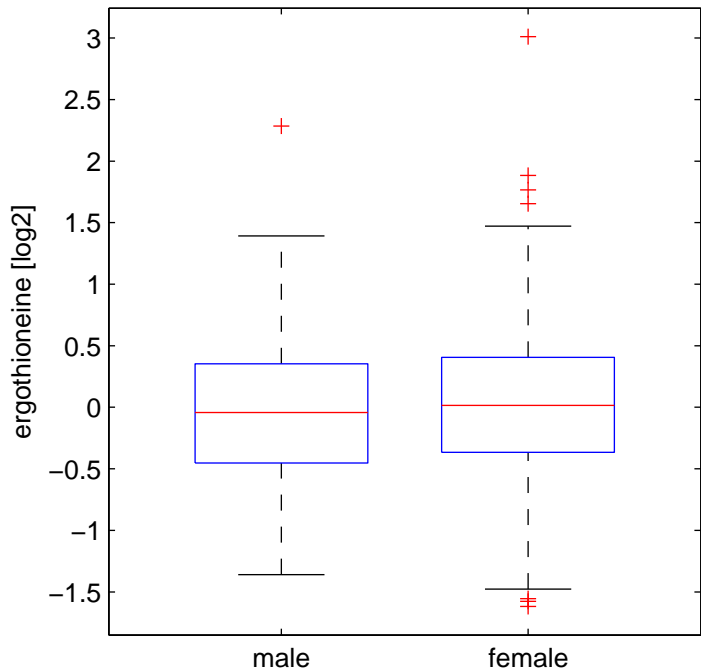

p-val: 2.58e-002

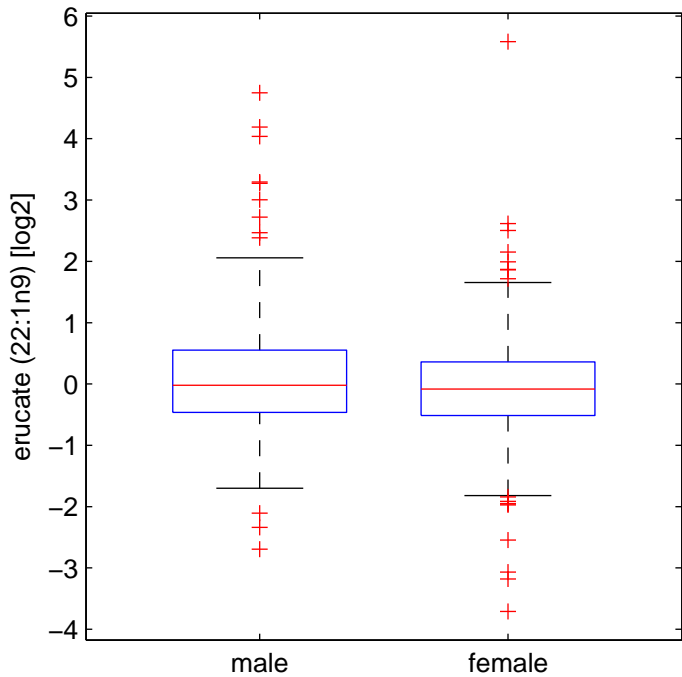

p-val: 1.09e-002

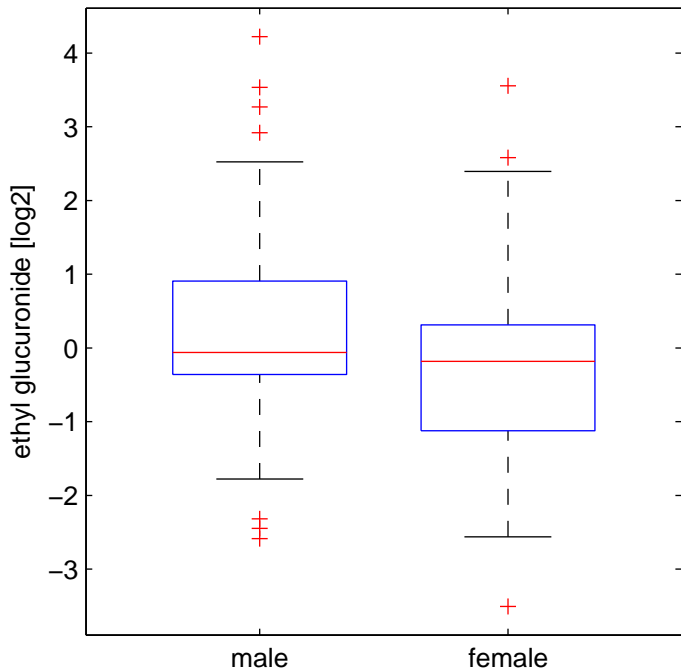

p-val: 1.59e-048

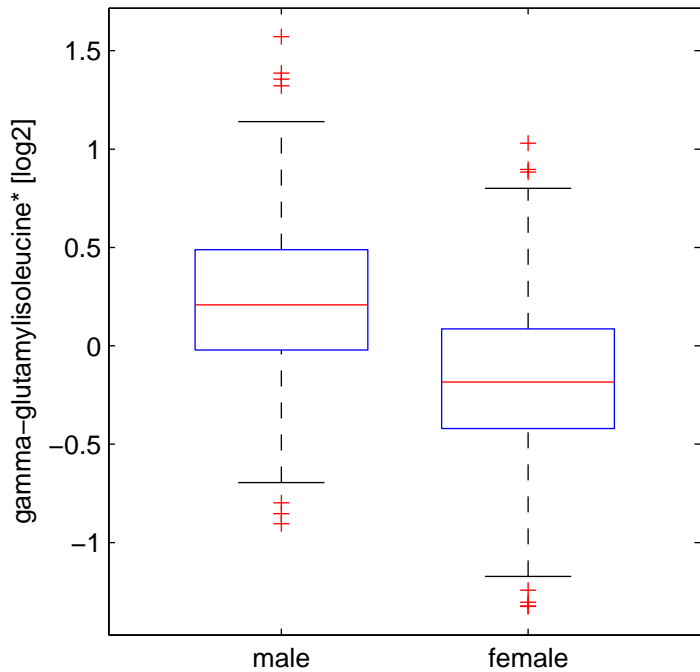

p-val: 5.78e-086

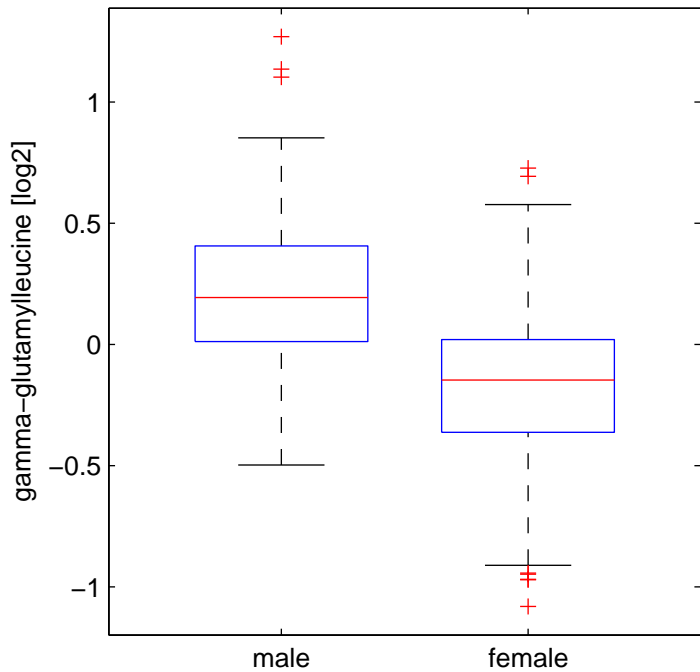



p-val:  $8.73e-023$

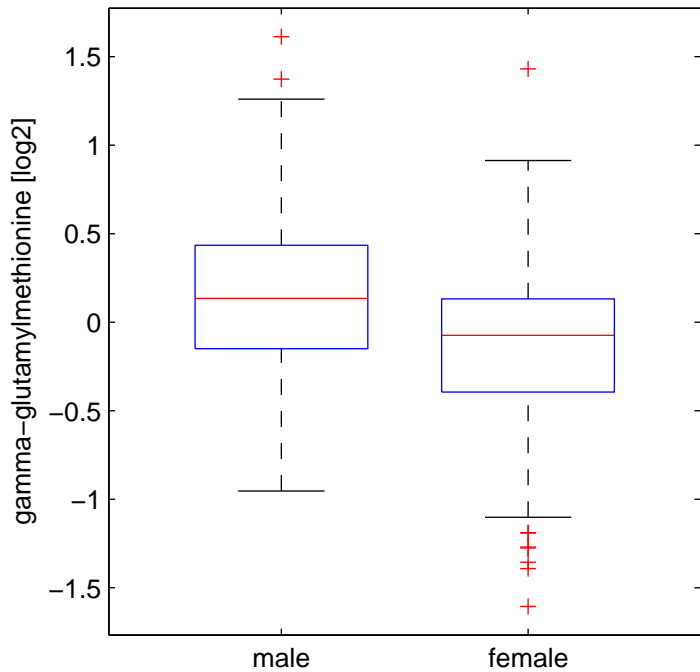

p-val: 8.00e-028

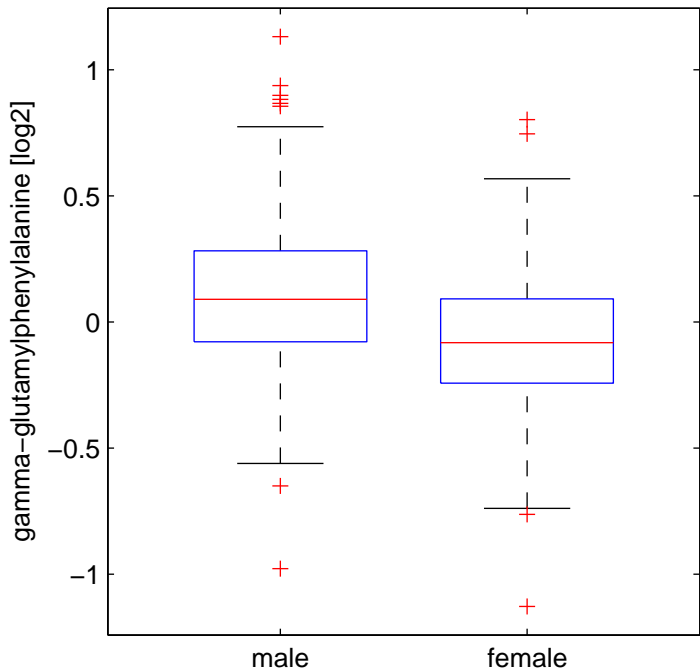

p-val: 9.67e-002

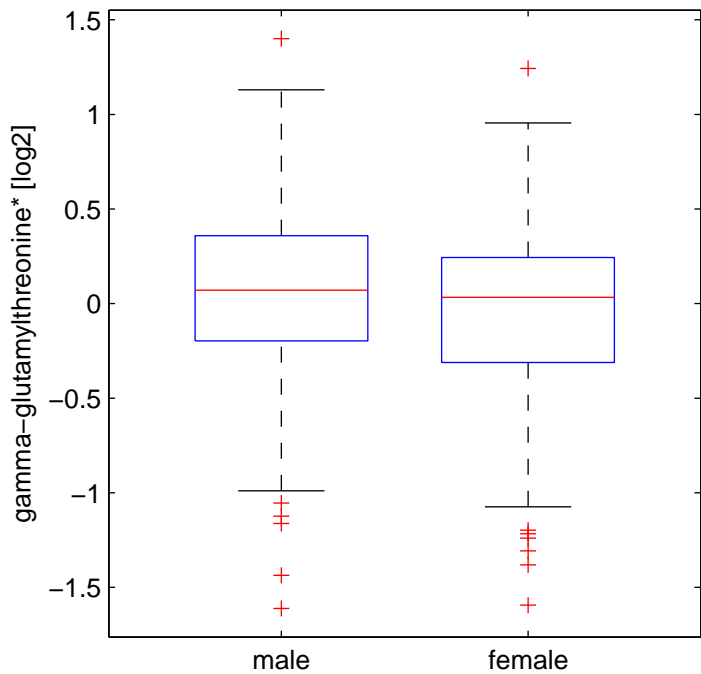

p-val: 3.97e-026

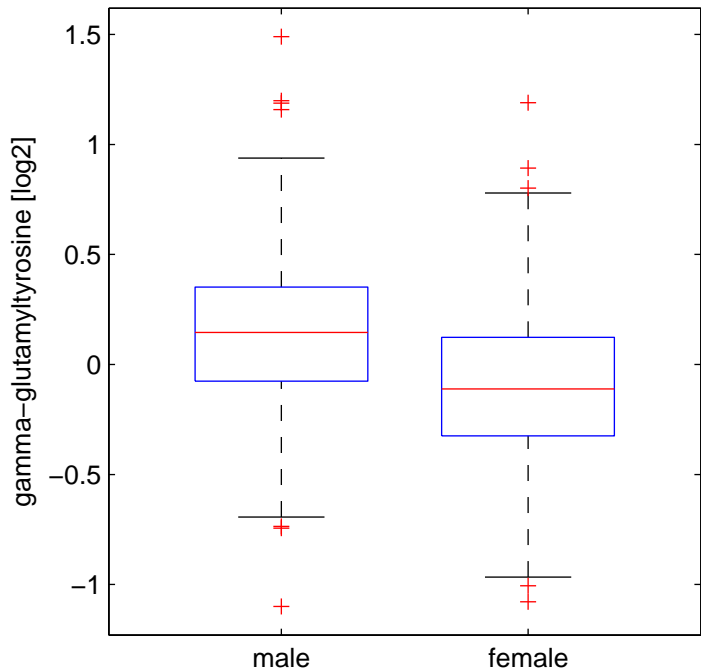

p-val: 3.22e-050

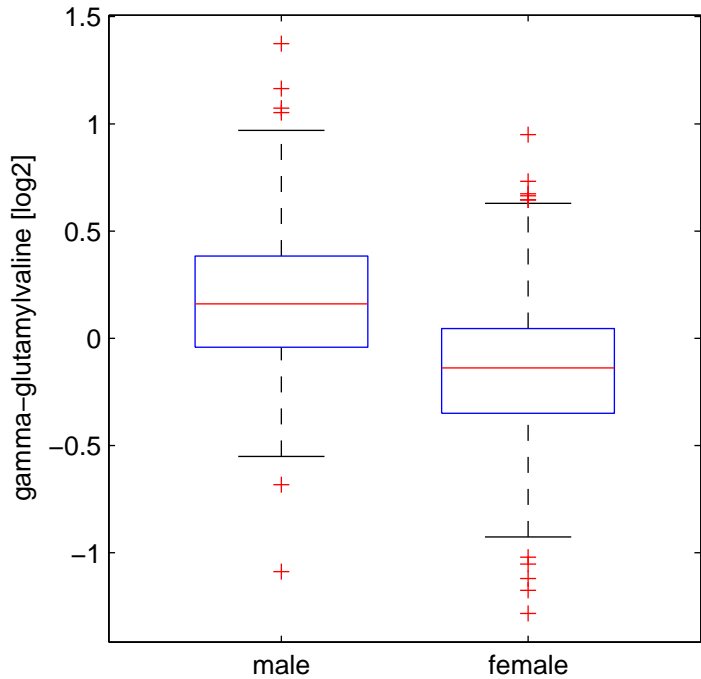

p-val:  $8.48e-017$

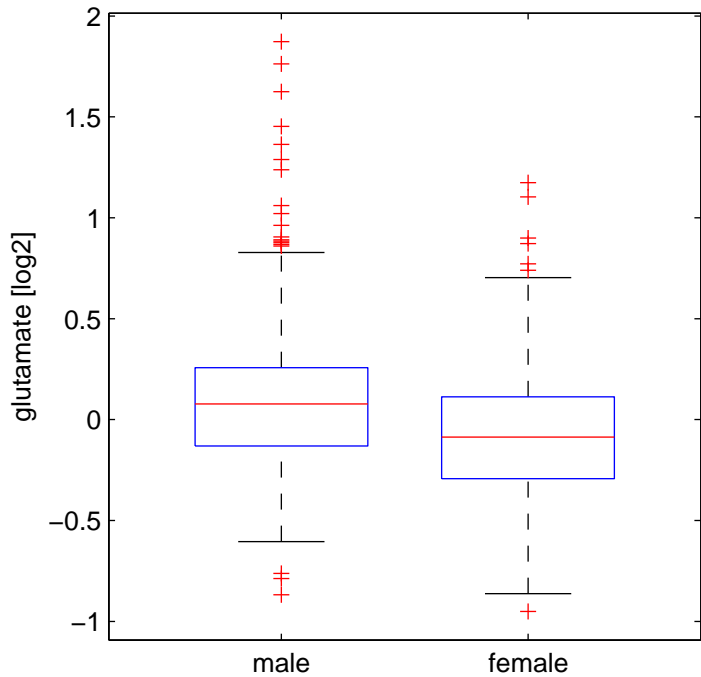

p-val: 1.58e-001

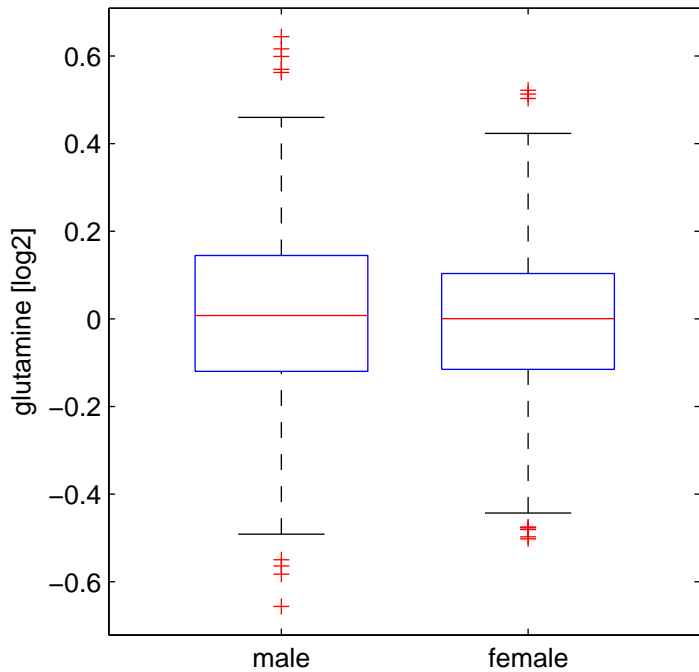

p-val: 1.16e-007

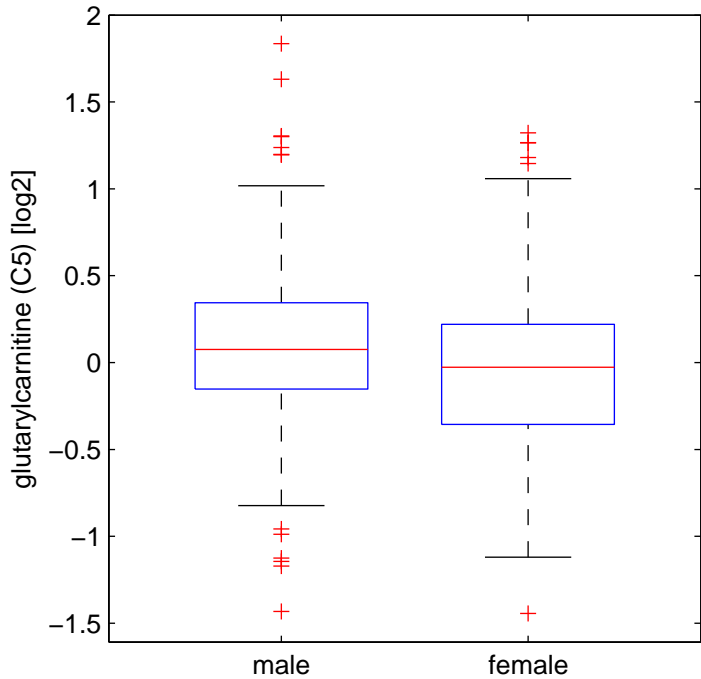





p-val: 2.37e-002

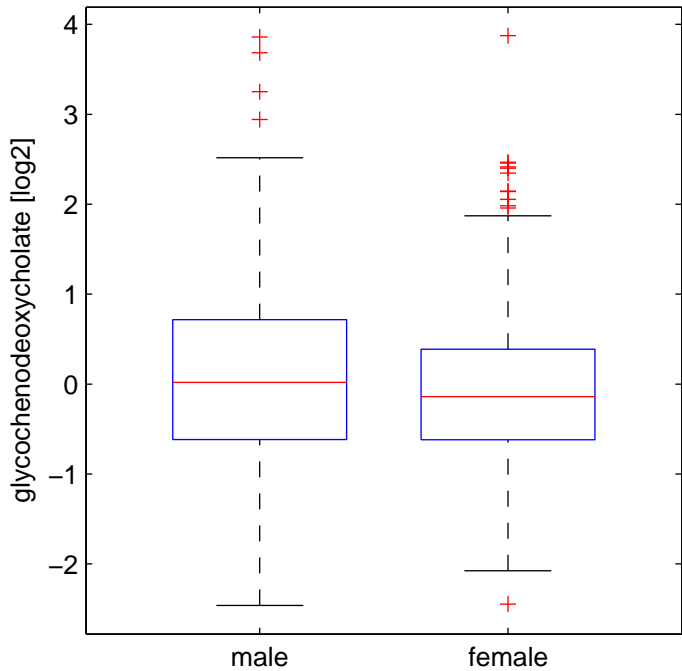

p-val: 2.56e-004

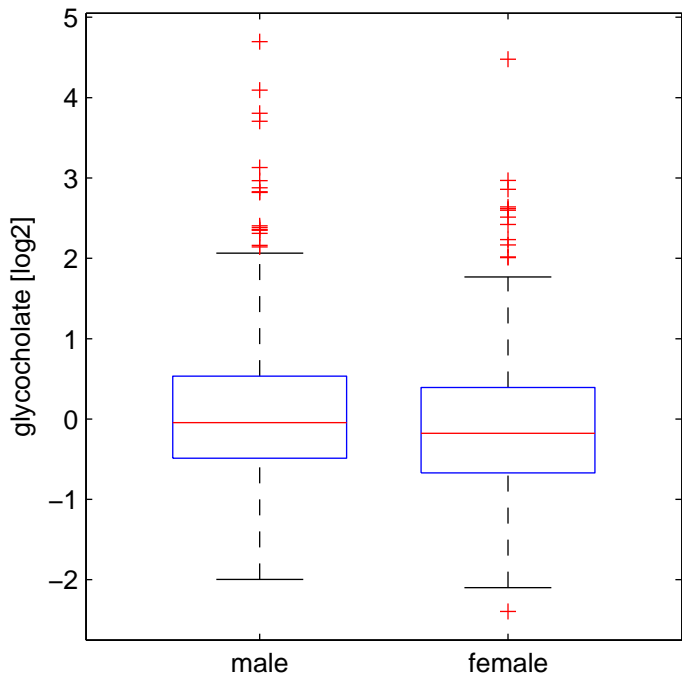

p-val: 9.96e-005

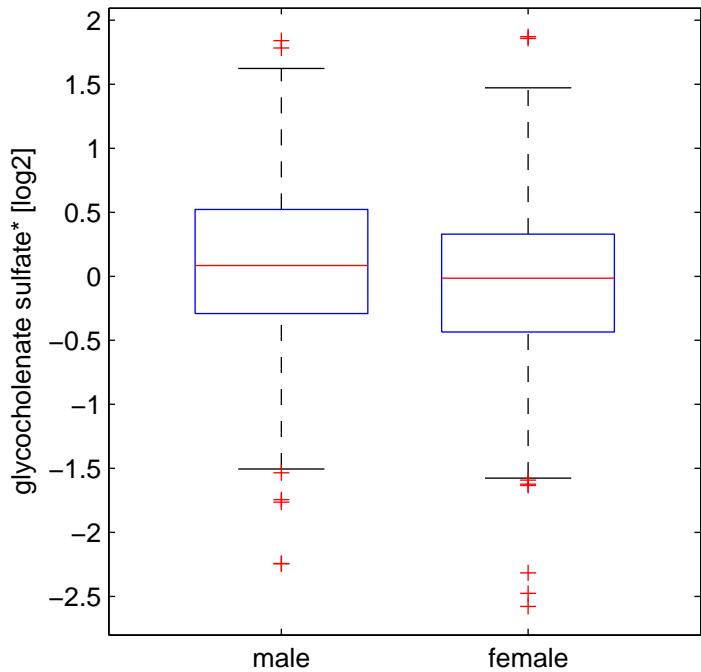

p-val: 2.42e-001

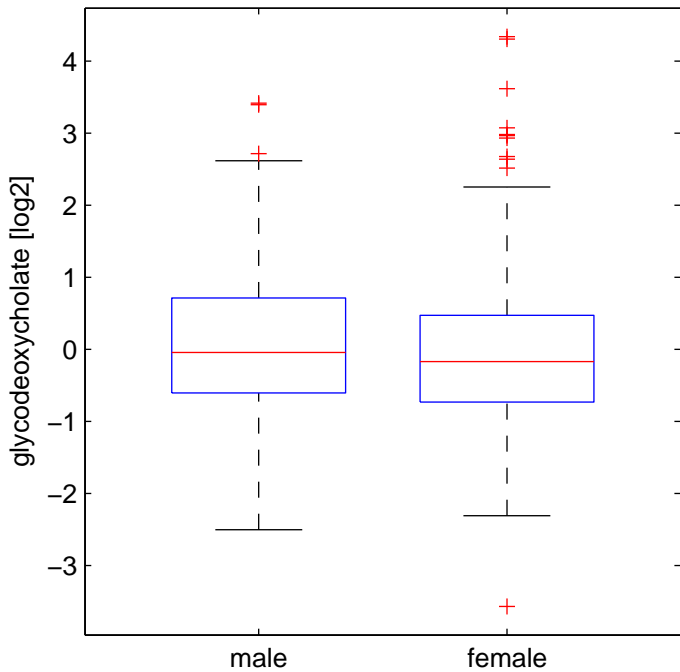

p-val: 9.09e-001

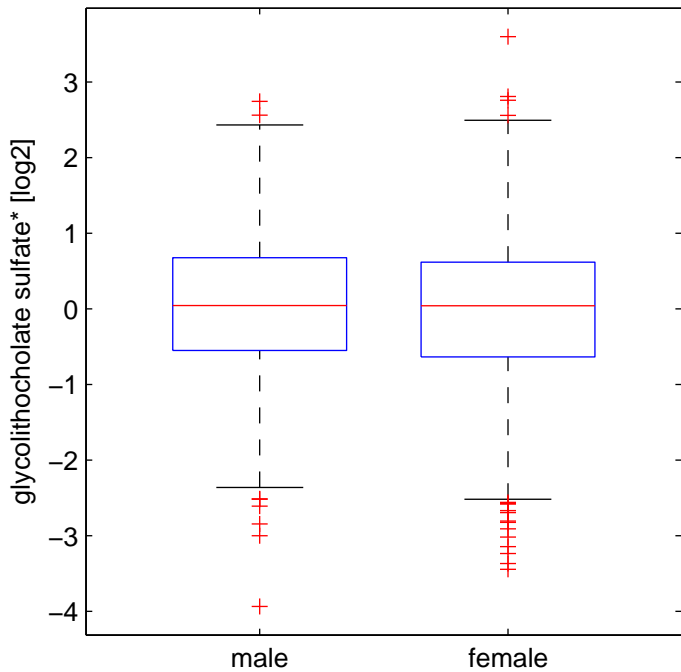

p-val: 8.57e-001

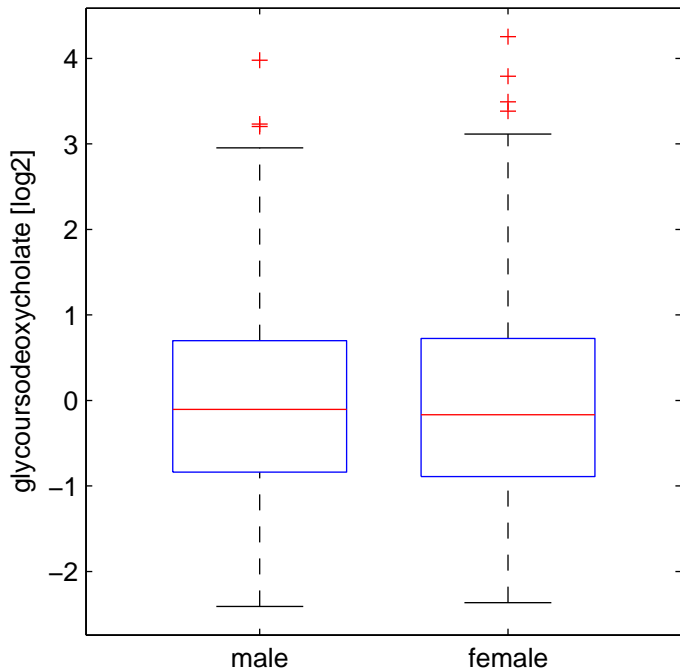

p-val: 4.60e-022

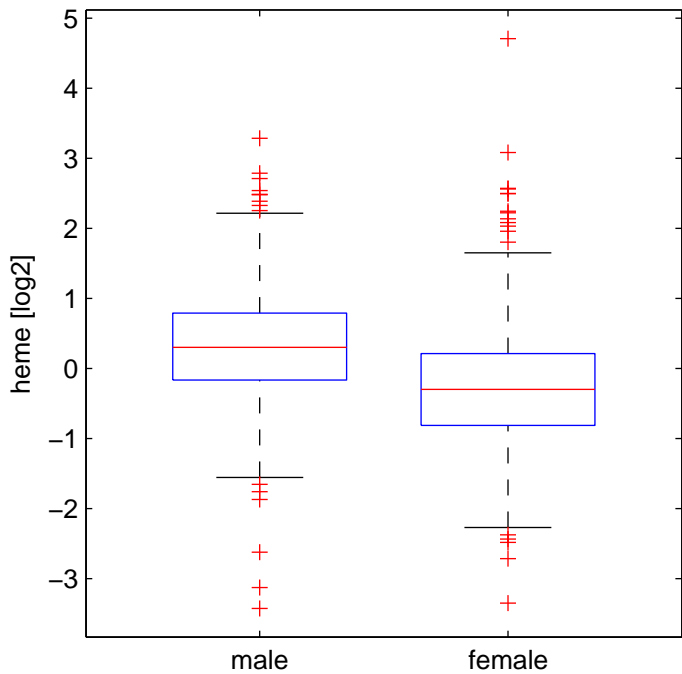



p-val: 1.01e-001

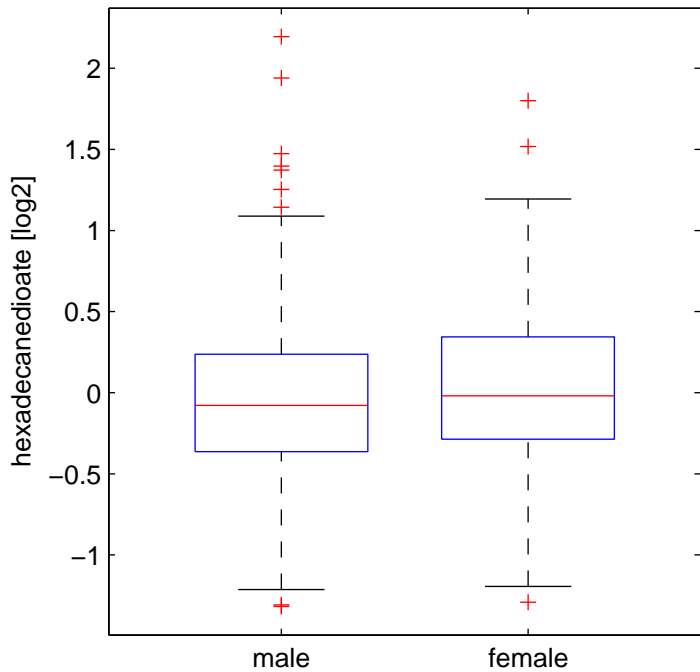

p-val: 4.76e-002

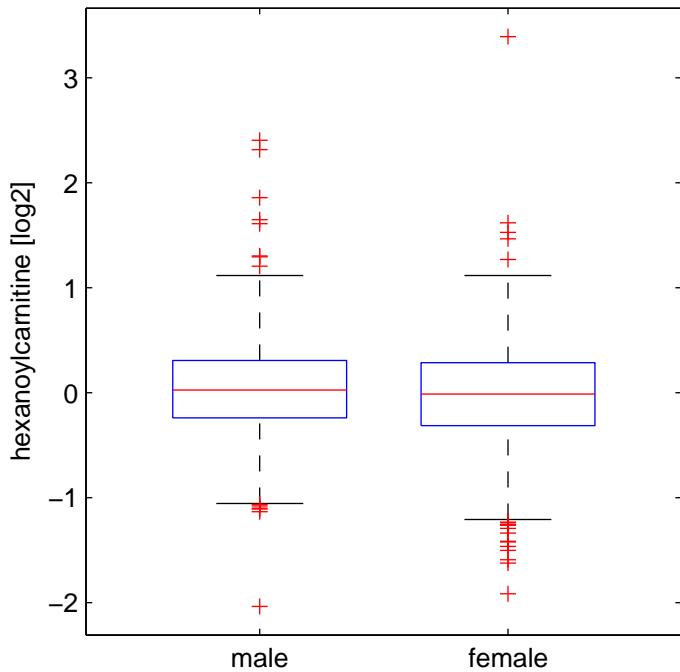

p-val: 1.13e-003

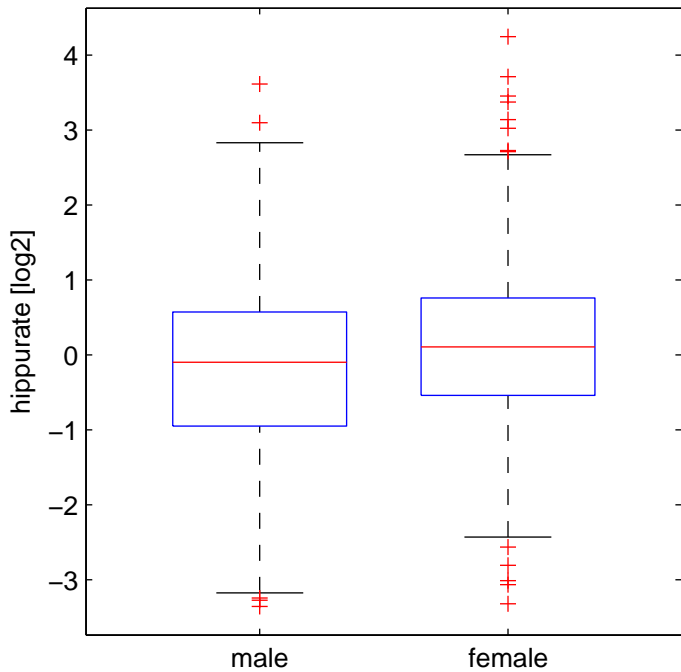

p-val: 2.65e-003

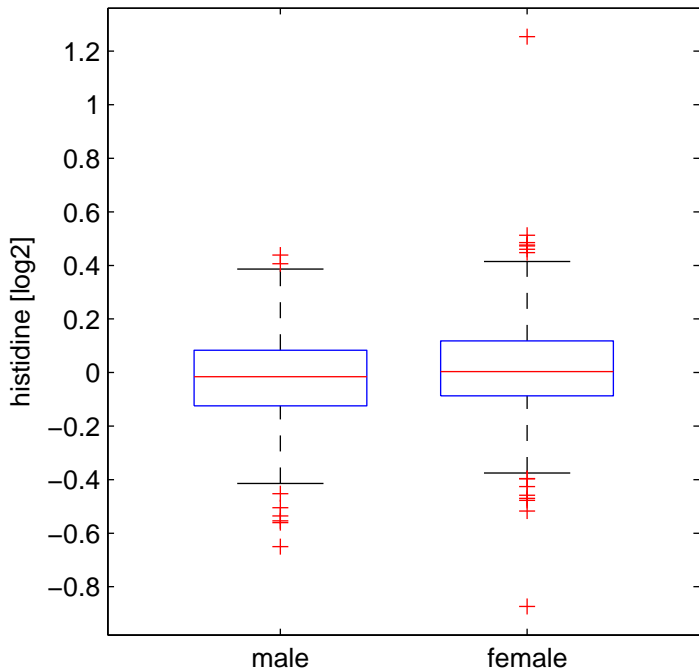

p-val: 6.49e-001

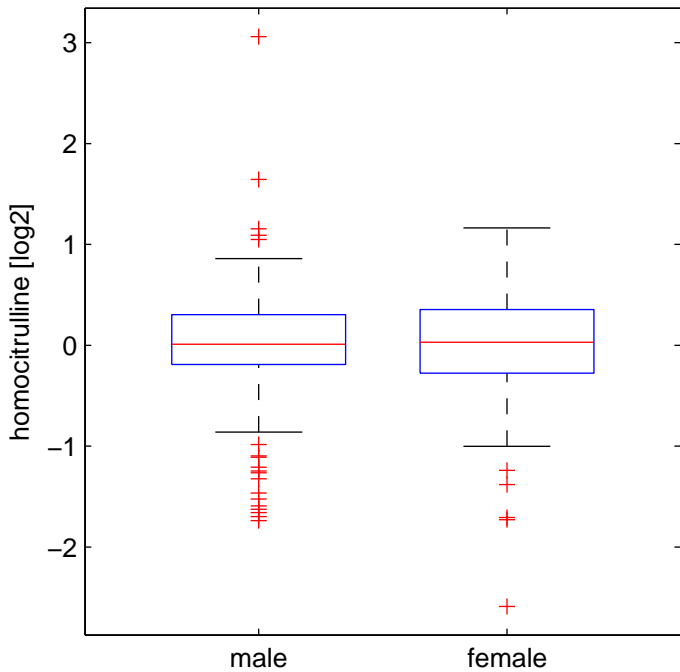

p-val: 8.30e-001

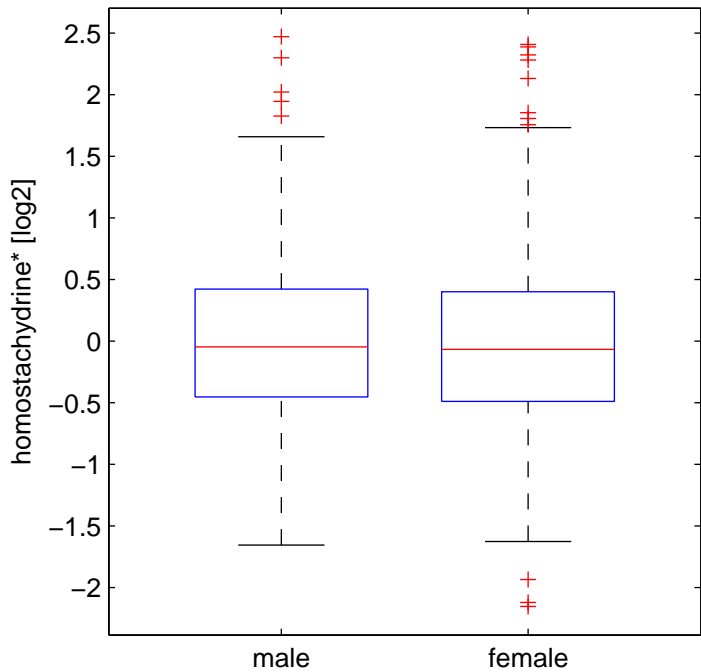

p-val: 7.89e-008

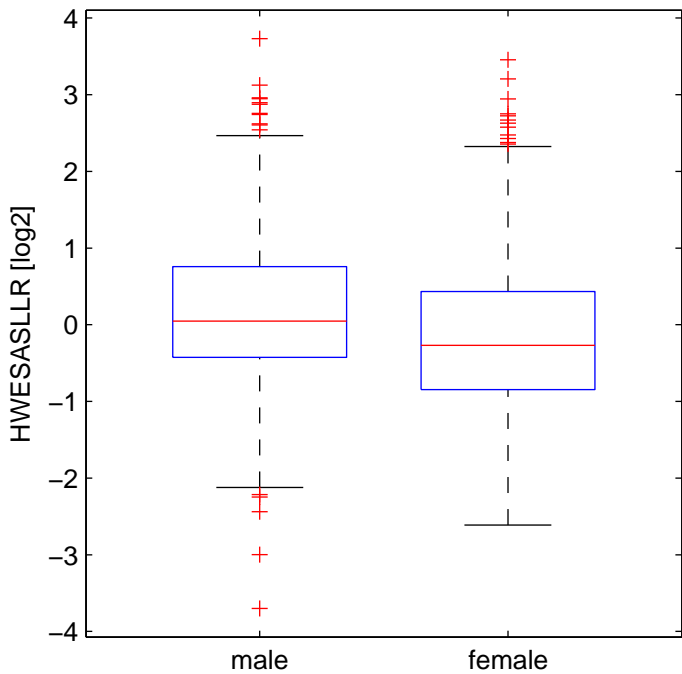

p-val: 6.10e-001

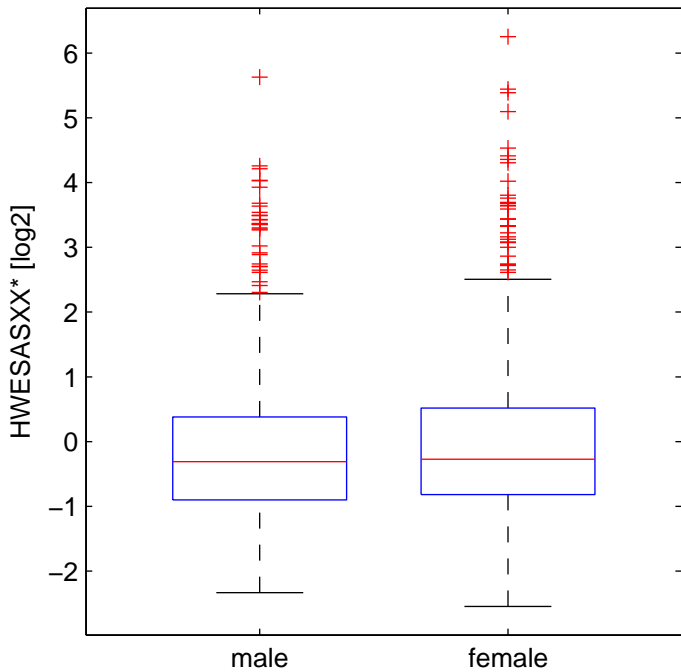



p-val: 4.01e-003

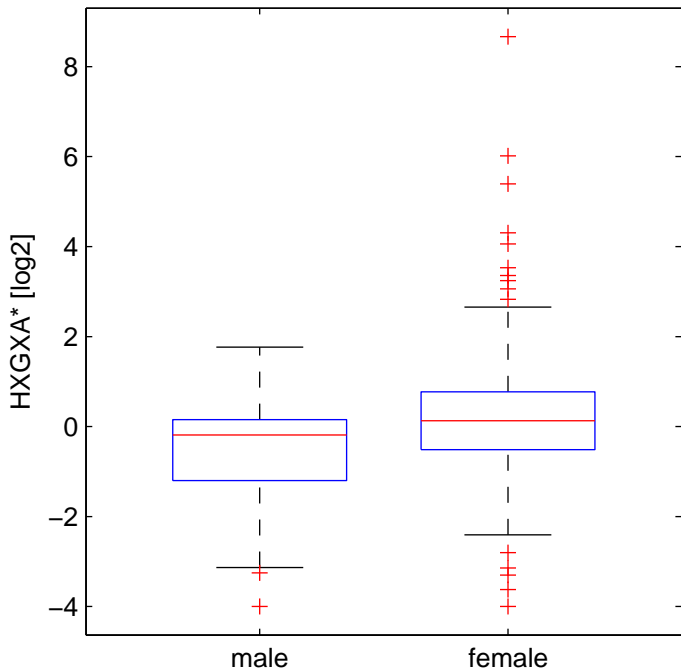

p-val: 1.51e-002

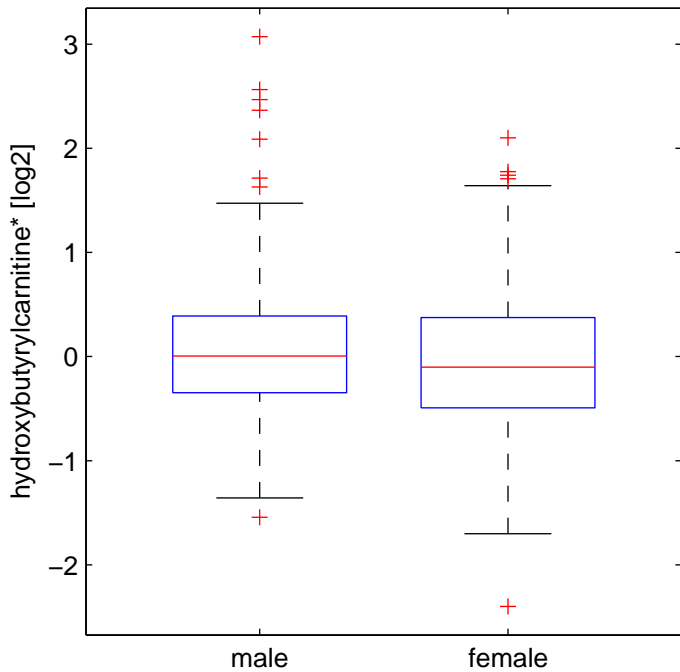

p-val: 1.24e-001

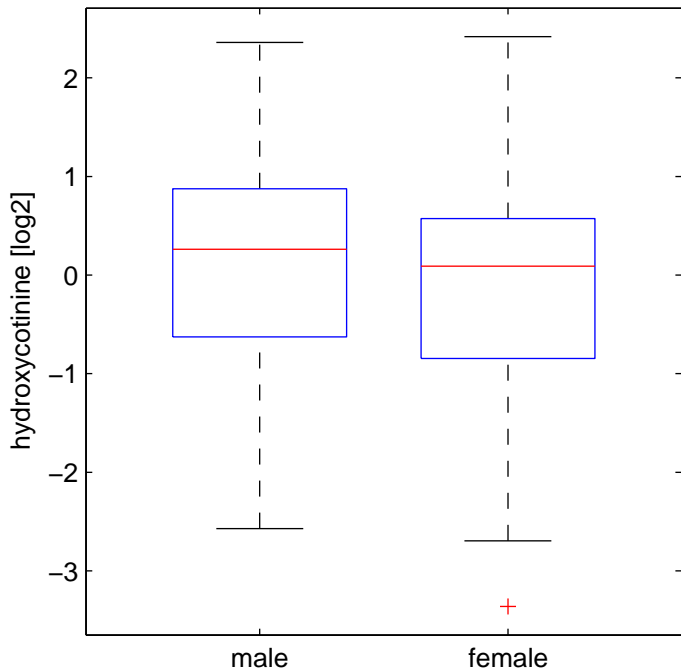

p-val: 9.98e-001

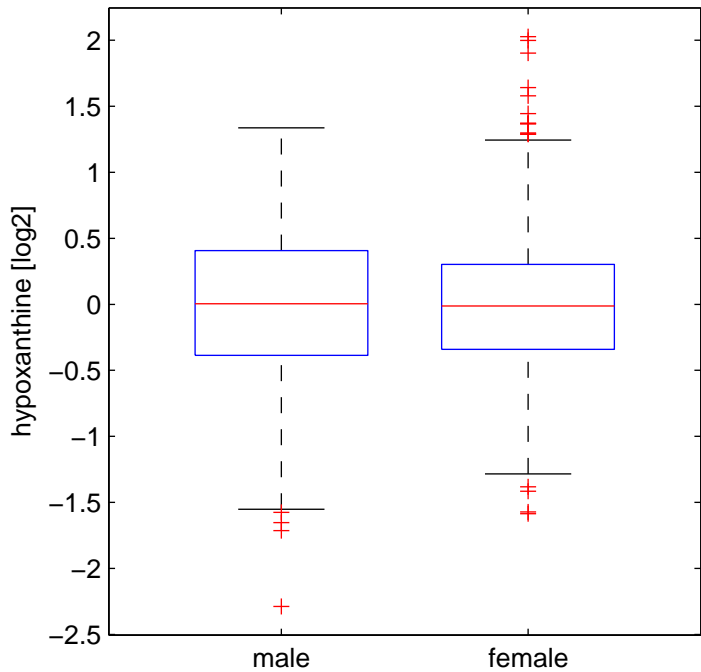

p-val: 1.01e-006

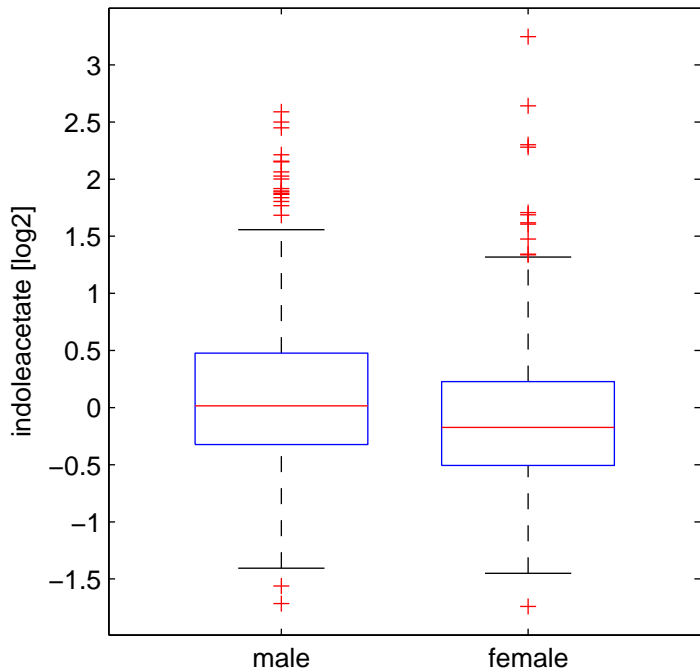

p-val: 1.94e-018

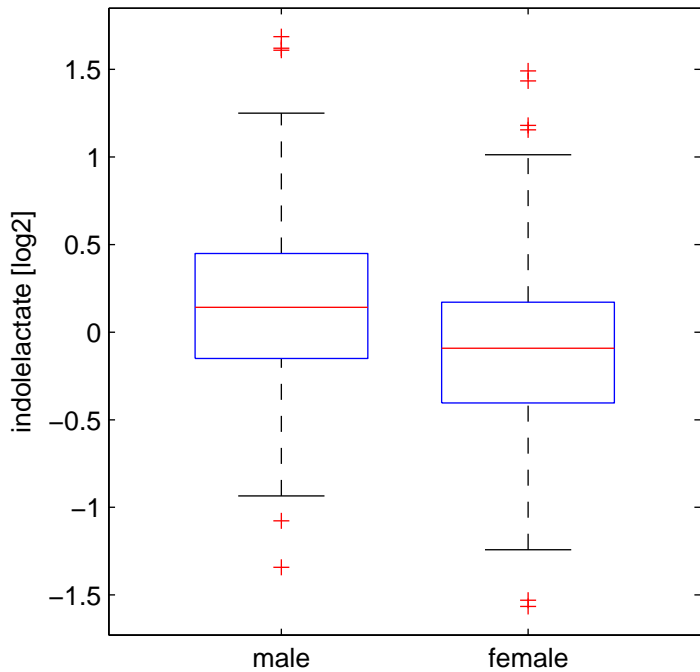

p-val: 1.47e-001

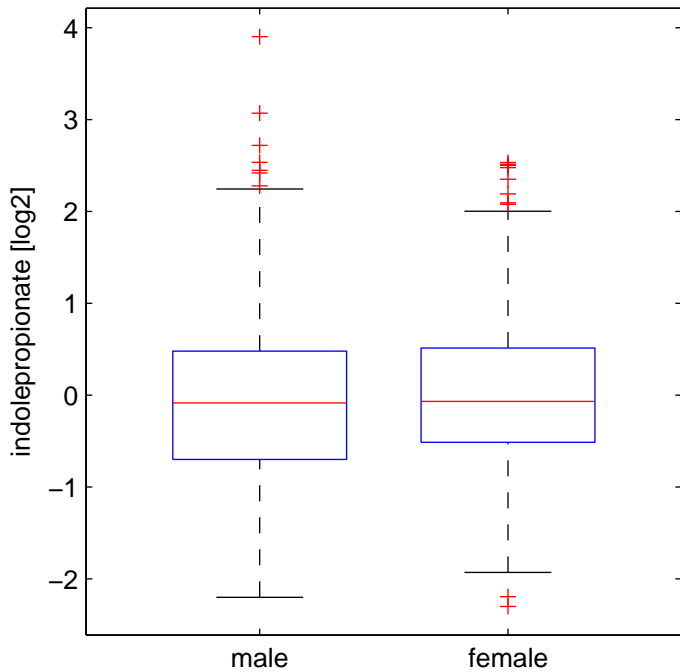

obar: glucose, fructose, mannose, galactose, allose, altrose, etc. [lc

p-val: 2.21e-006

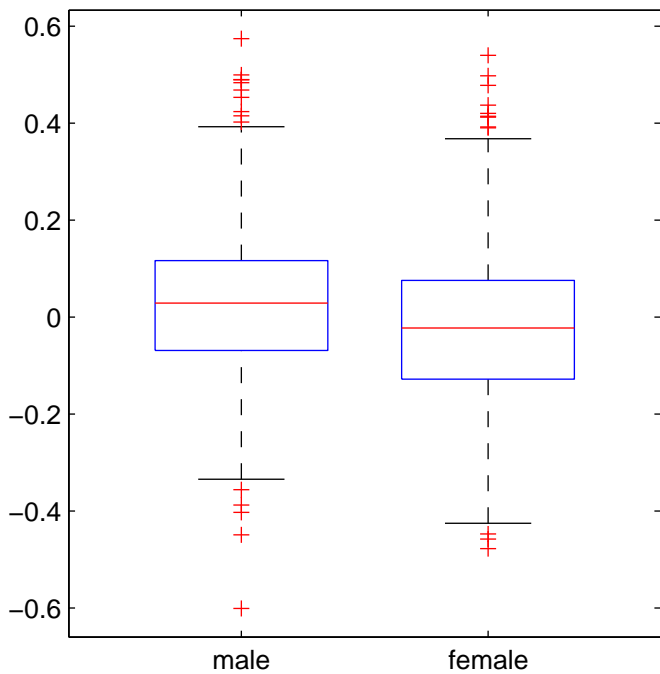



p-val: 1.16e-003

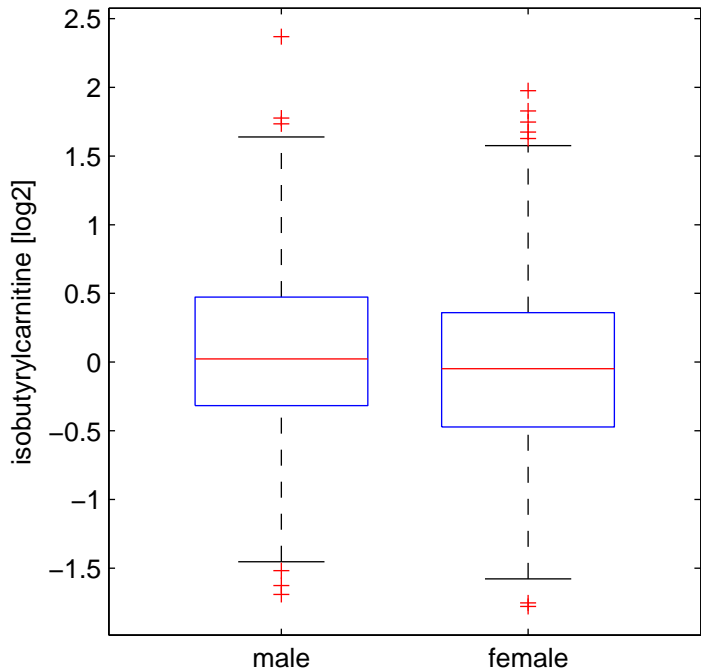

p-val: 2.40e-061

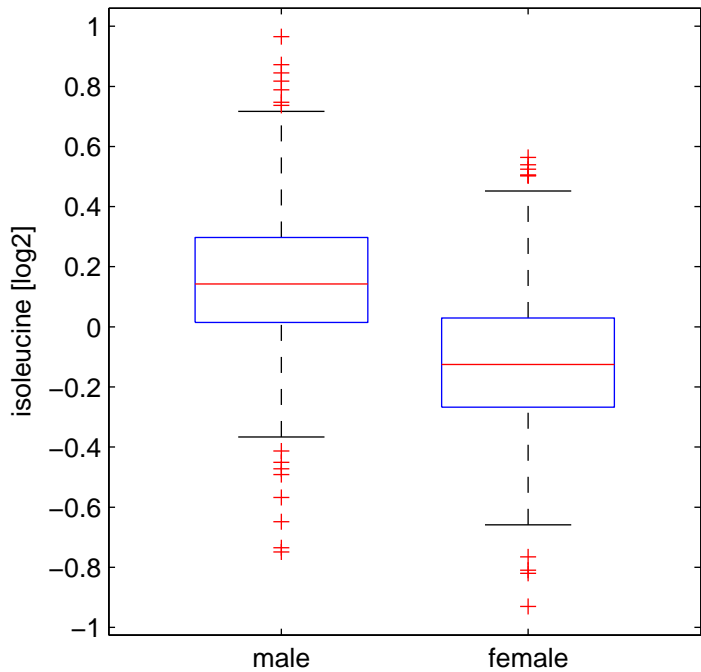

p-val: 3.43e-019

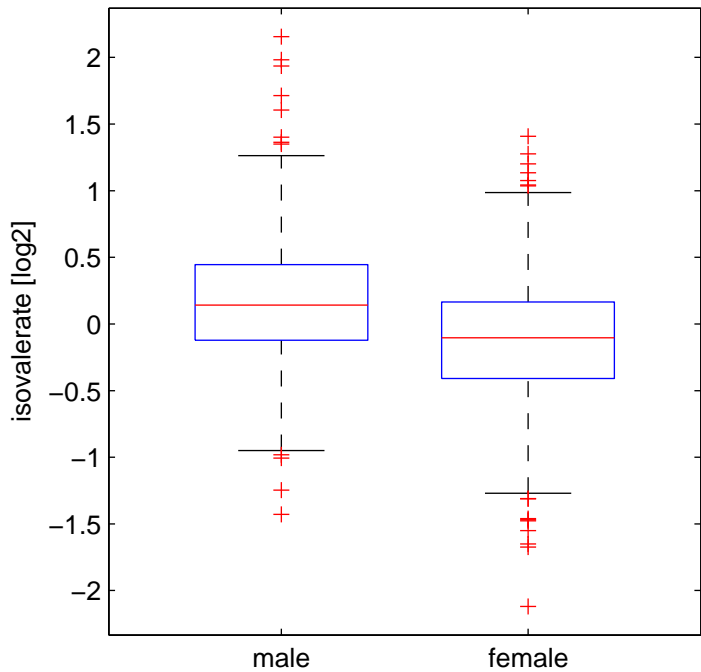

p-val:  $8.79e-045$

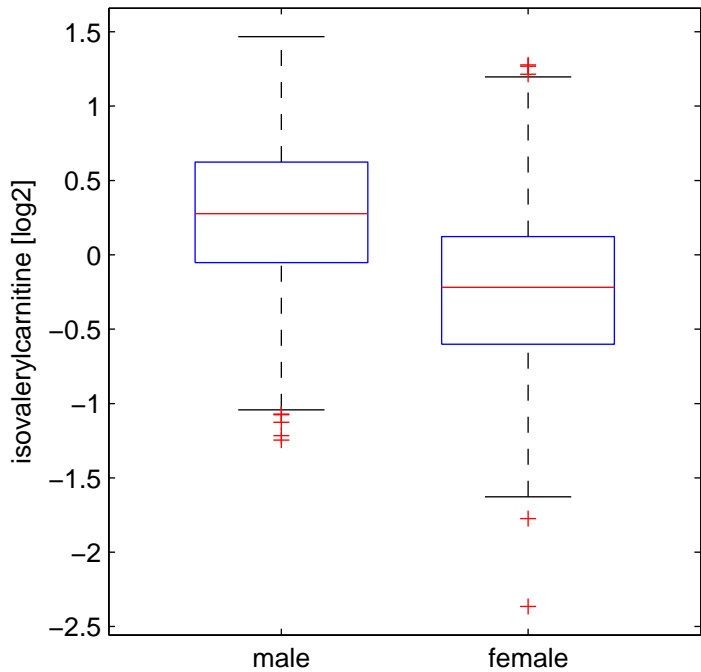

p-val: 8.15e-001

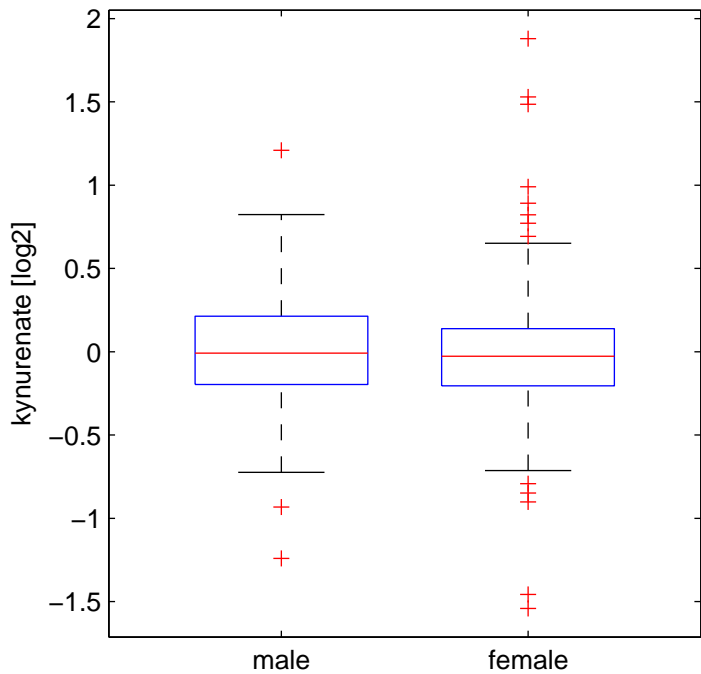

p-val: 1.68e-005

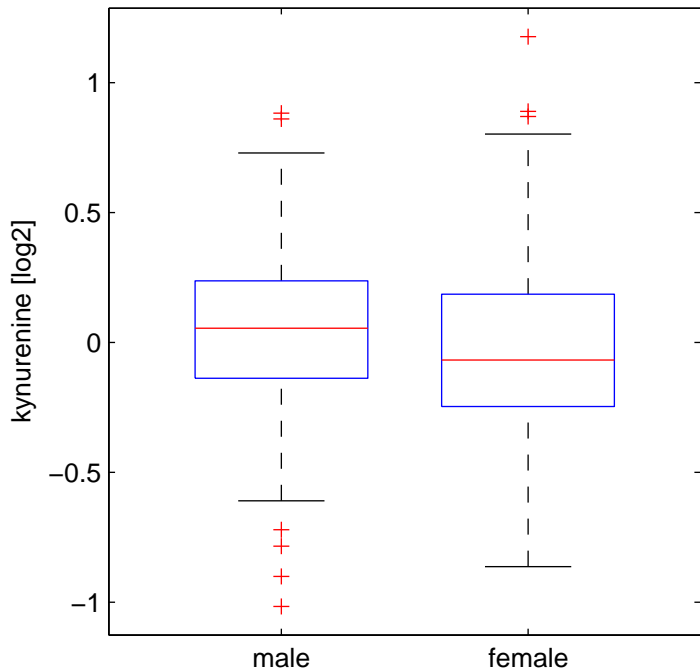

p-val: 6.08e-002

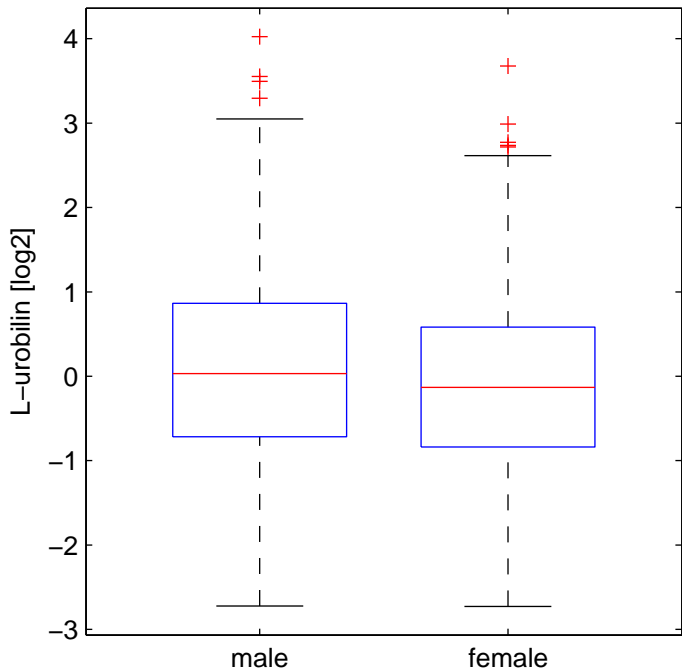

p-val: 3.60e-001

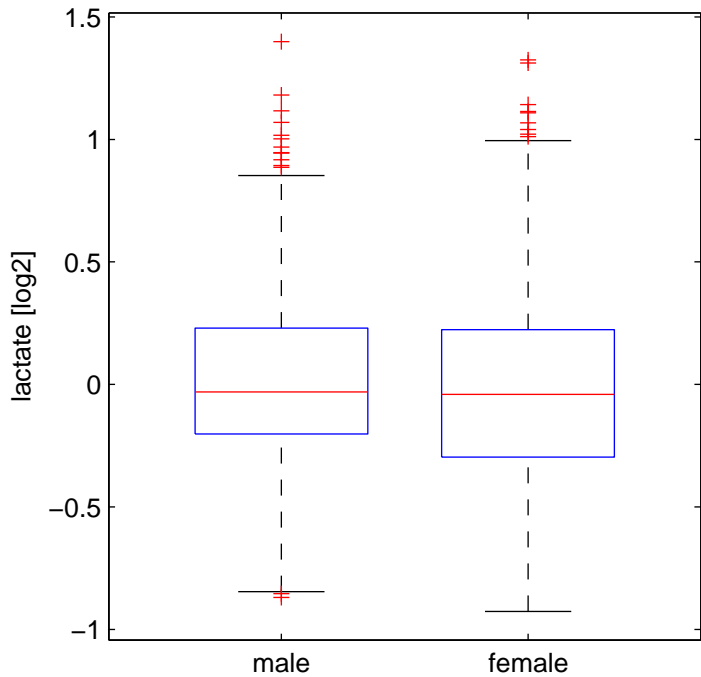



p-val: 5.15e-014

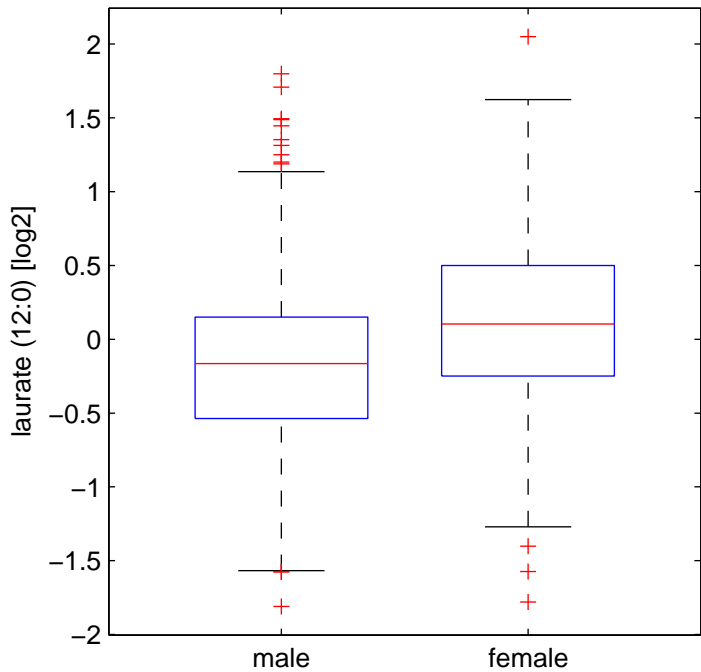

p-val: 6.09e-009

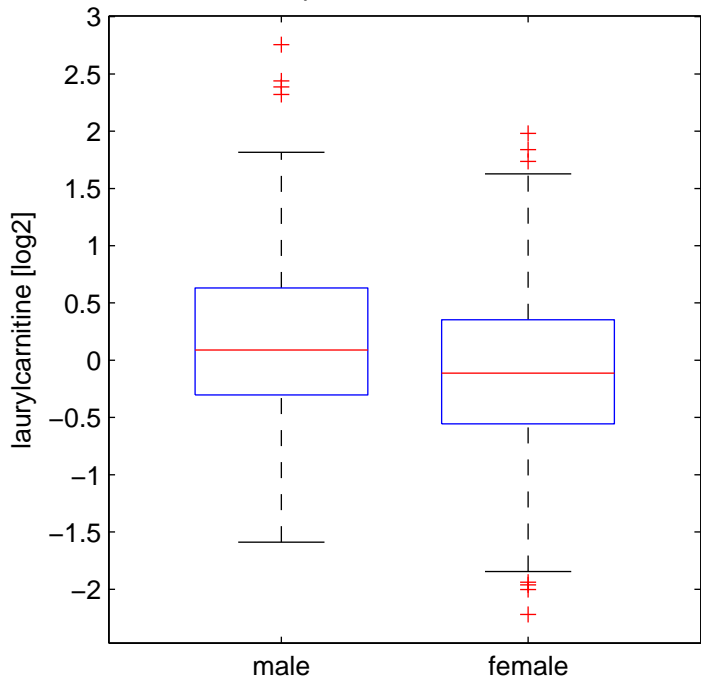

p-val: 1.90e-060

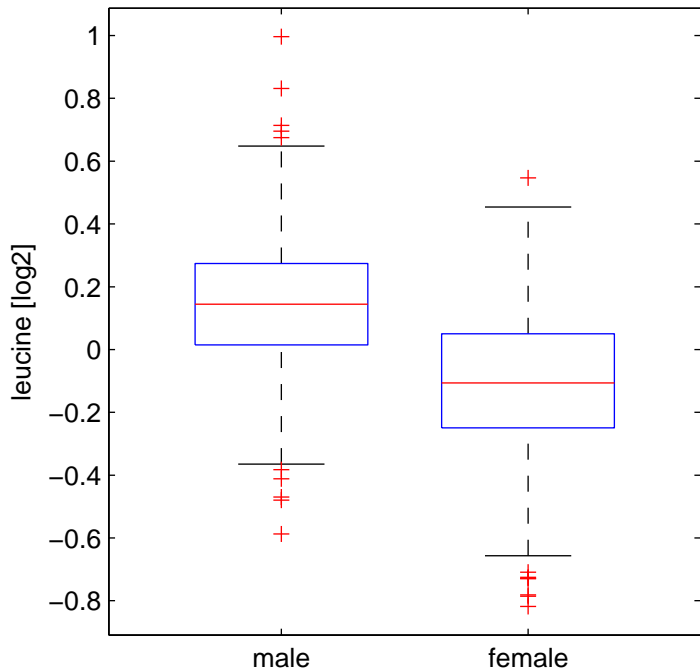

p-val: 2.55e-001

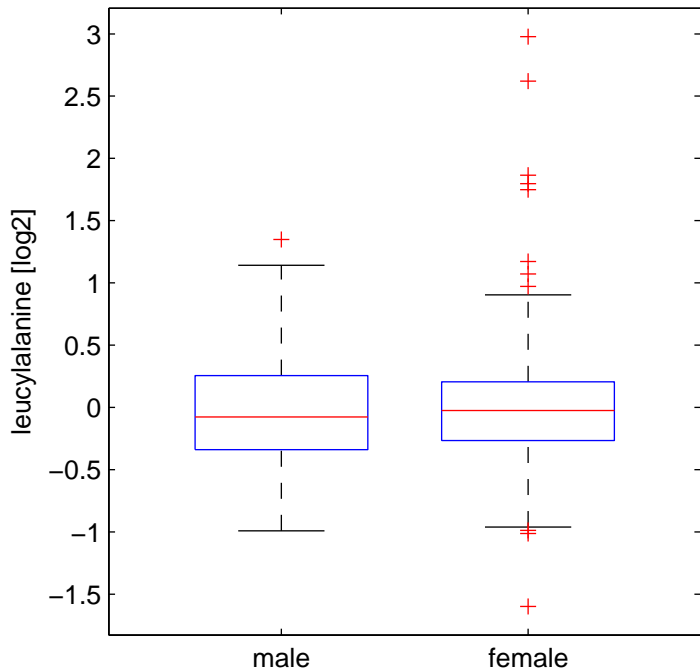

p-val: 3.42e-001

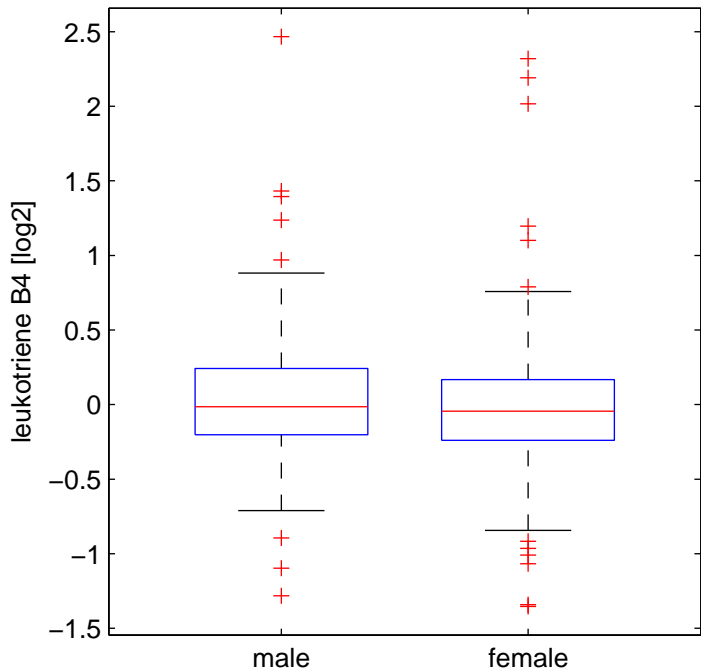

p-val: 6.11e-016

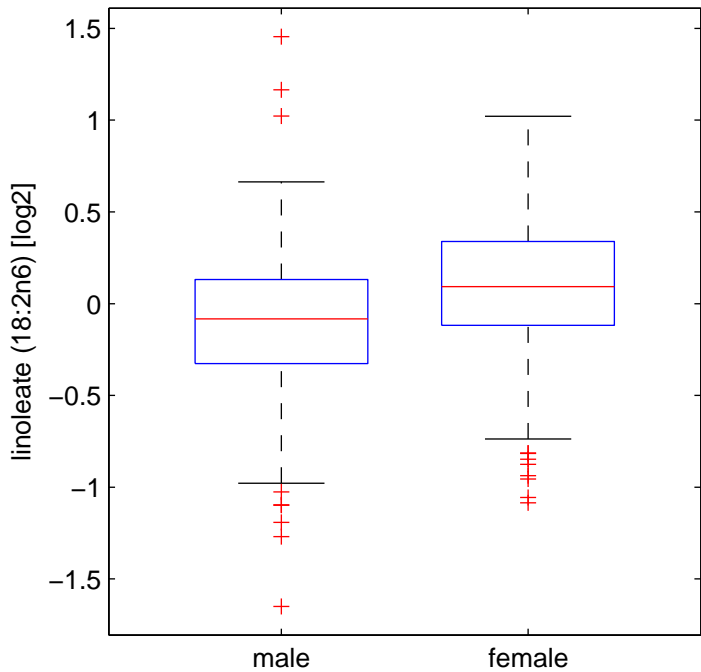

p-val: 1.62e-011

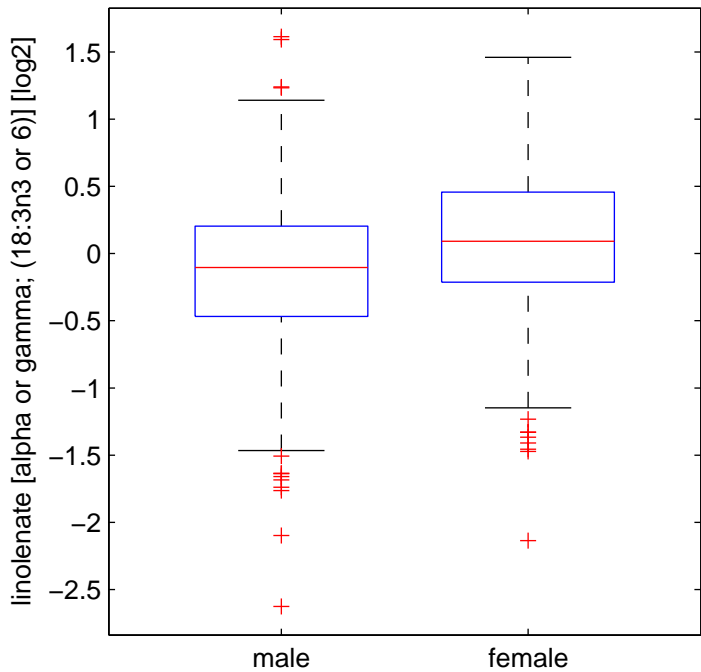

p-val: 9.71e-005

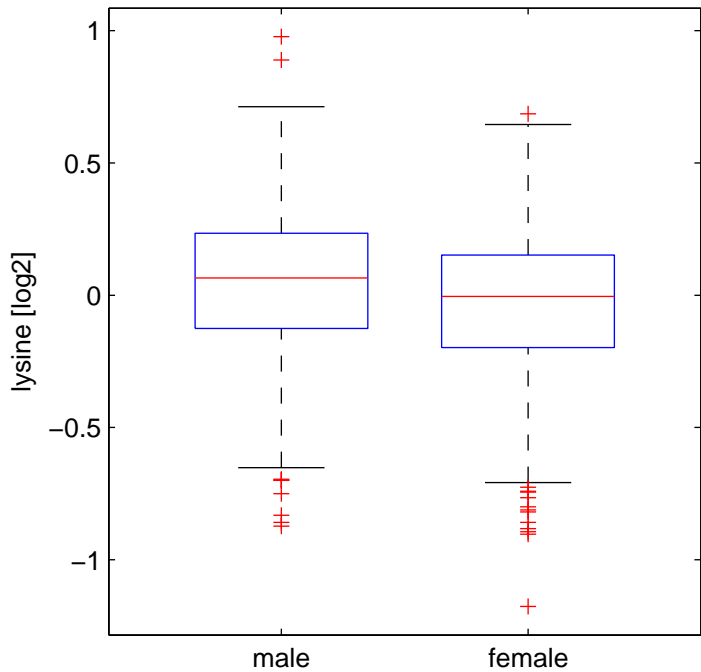



p-val: 5.72e-005

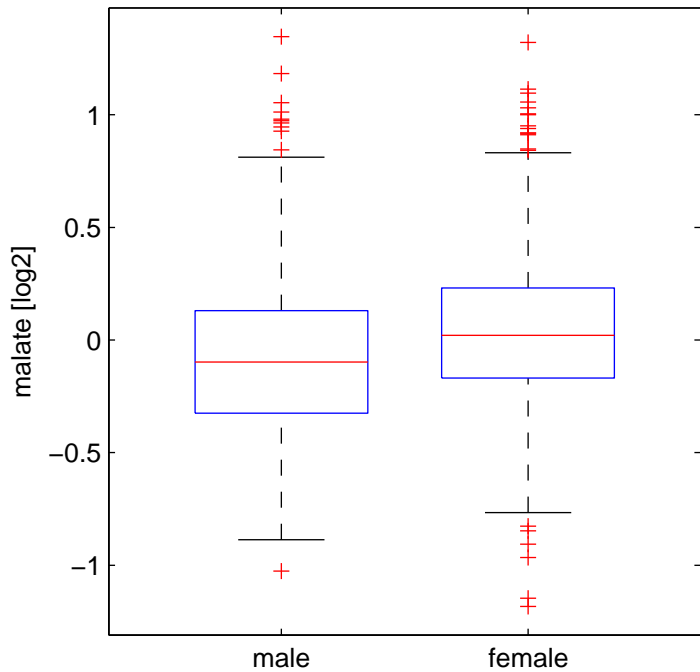

p-val: 4.53e-010

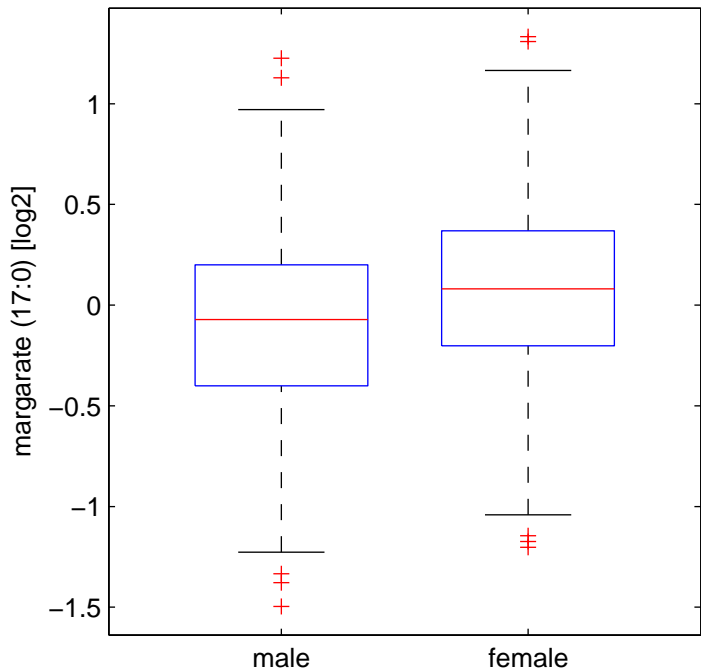

p-val: 2.58e-018

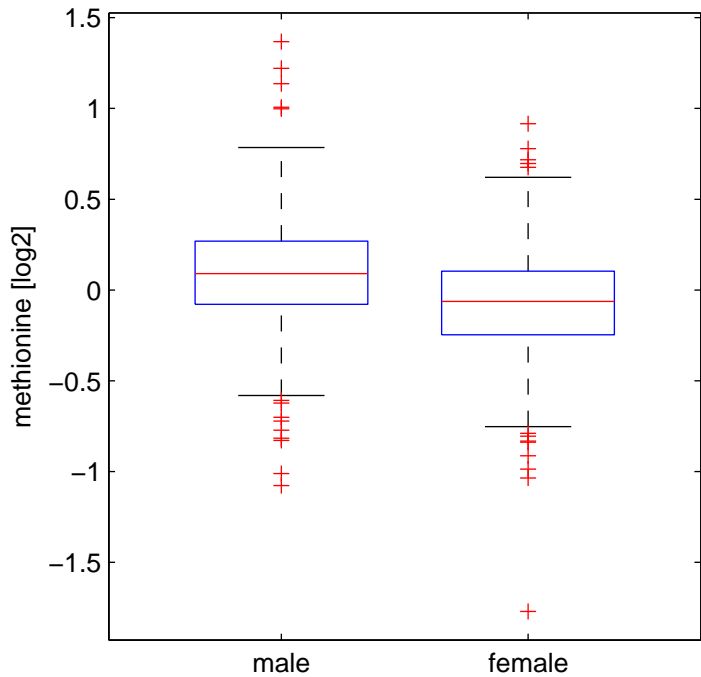

p-val: 2.11e-003

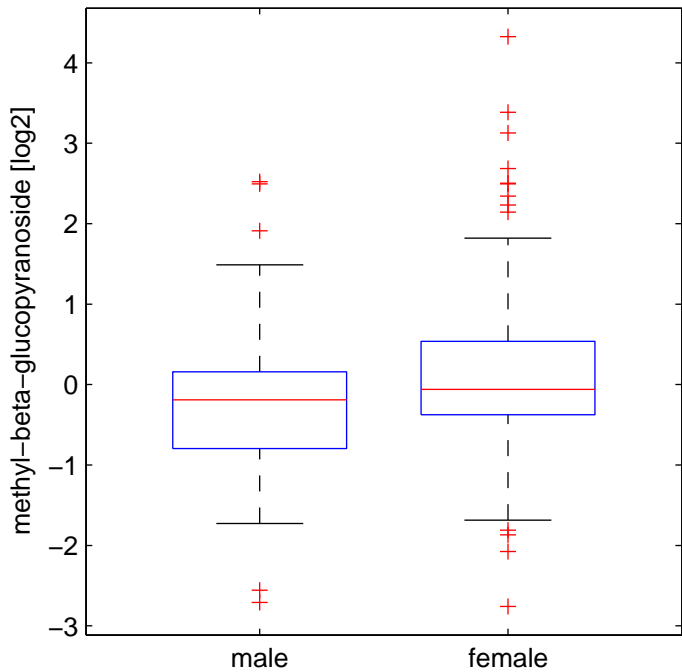

p-val: 2.34e-020

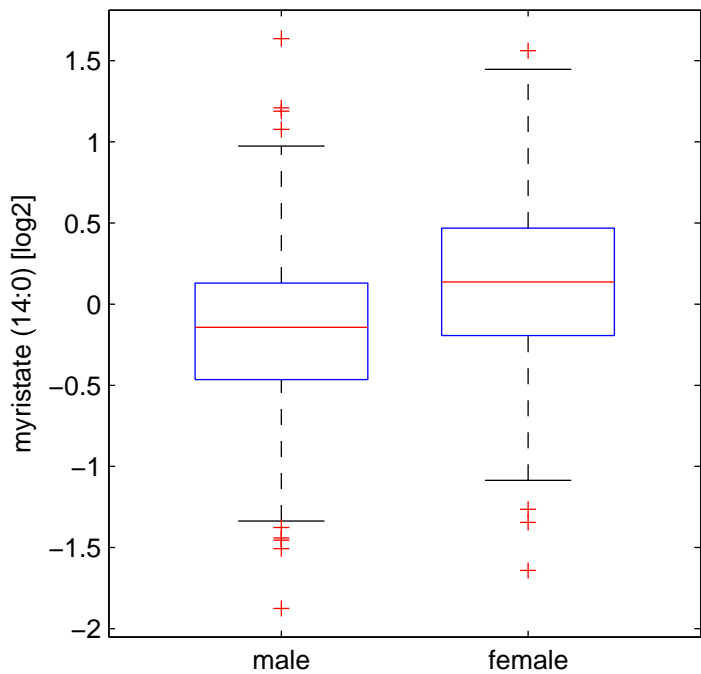

p-val: 7.30e-046

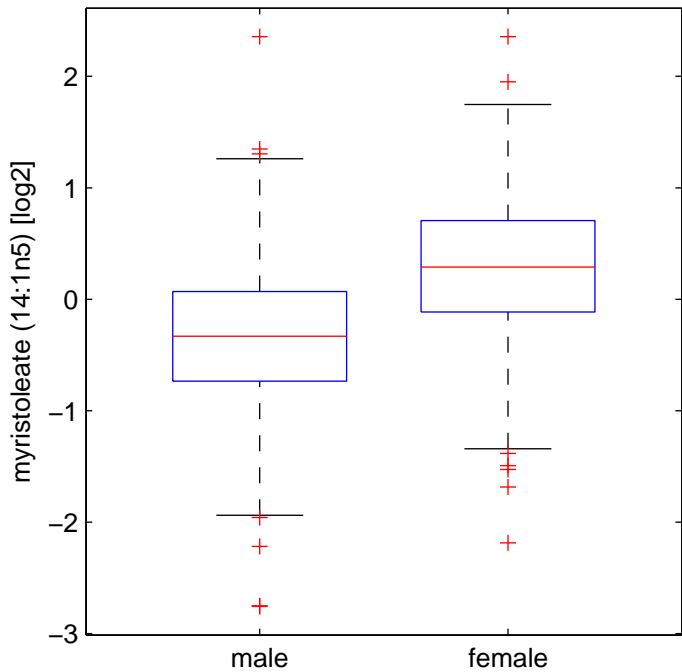

p-val: 4.11e-001

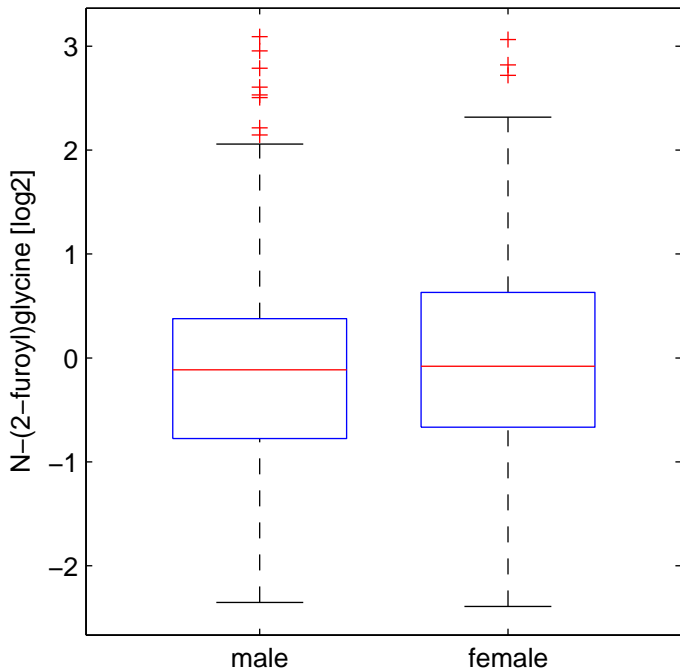

p-val: 5.65e-010

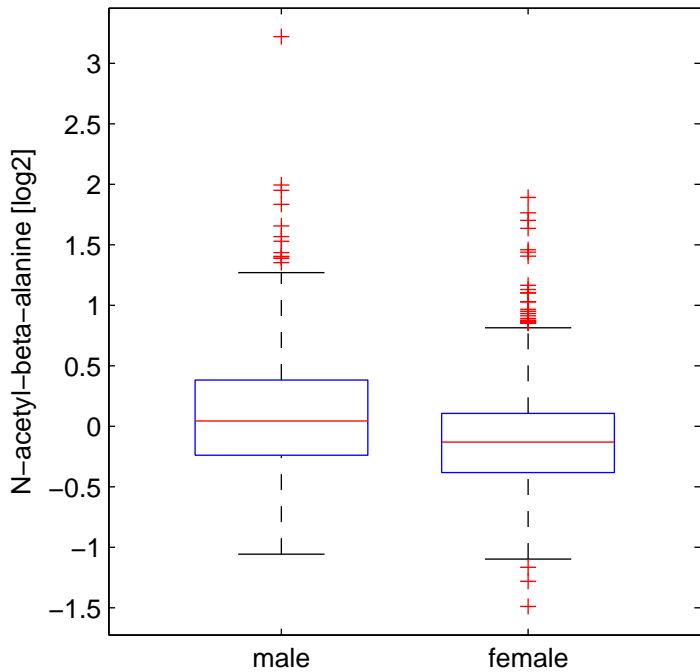



p-val: 3.43e-001

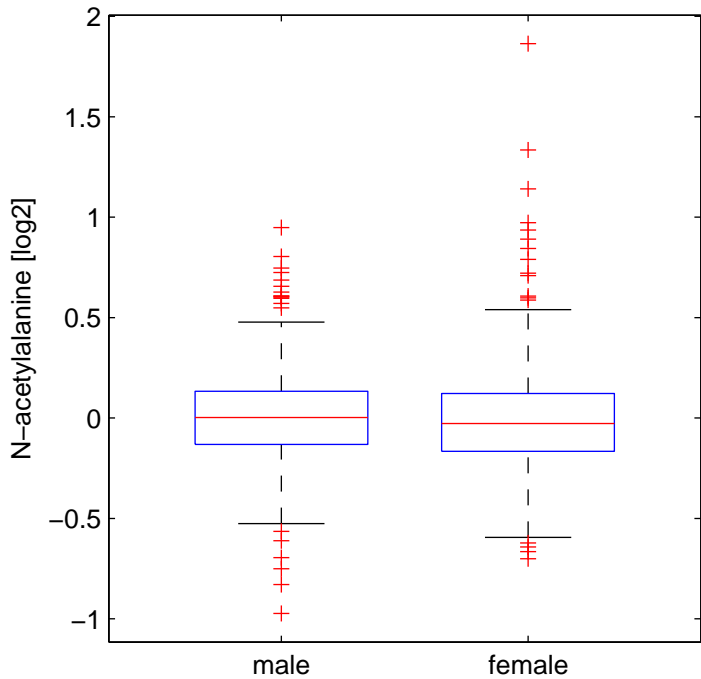

p-val: 2.11e-051

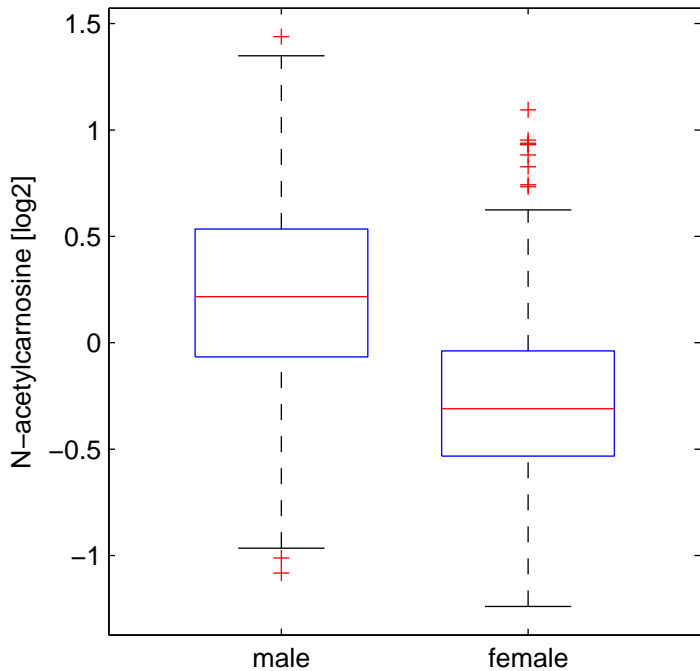

p-val: 5.71e-001

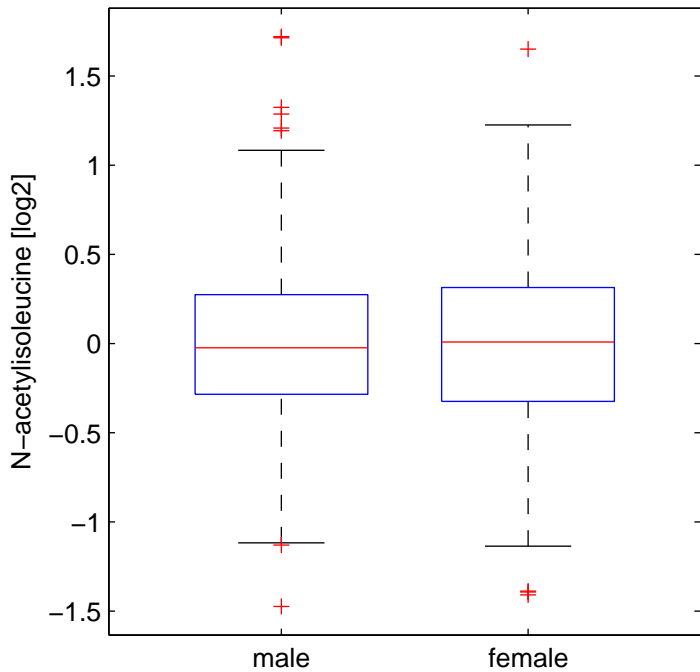

p-val: 9.47e-003

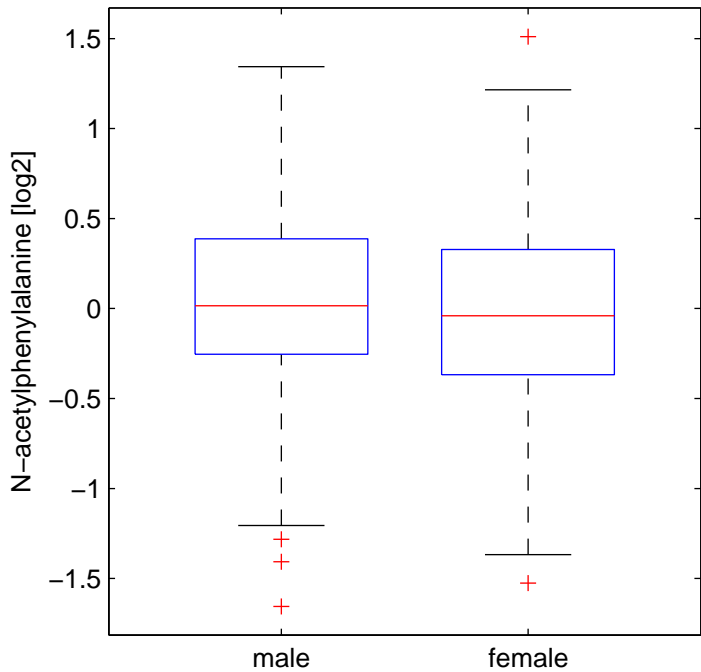

p-val: 1.69e-001

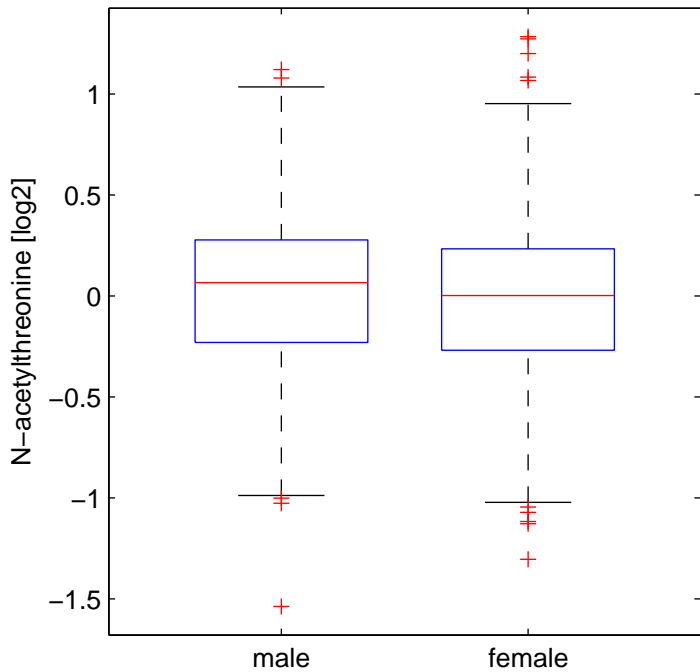

p-val: 2.23e-004

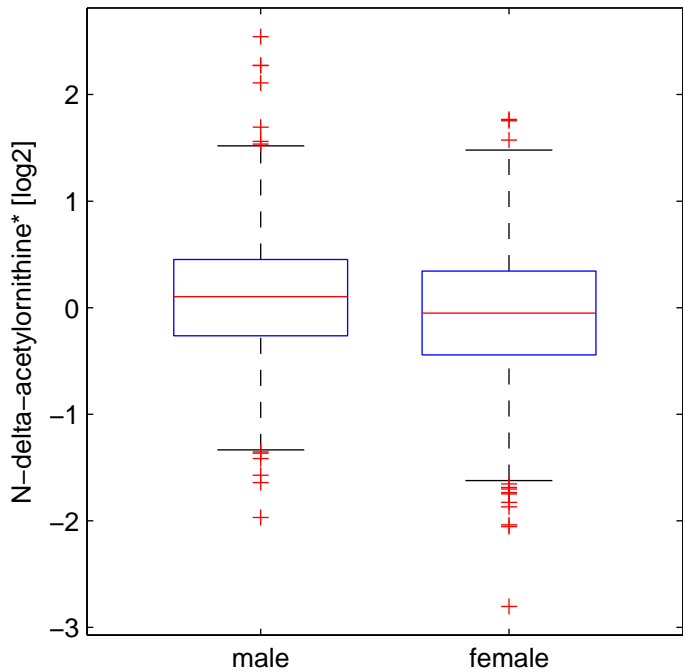

p-val: 2.92e-008

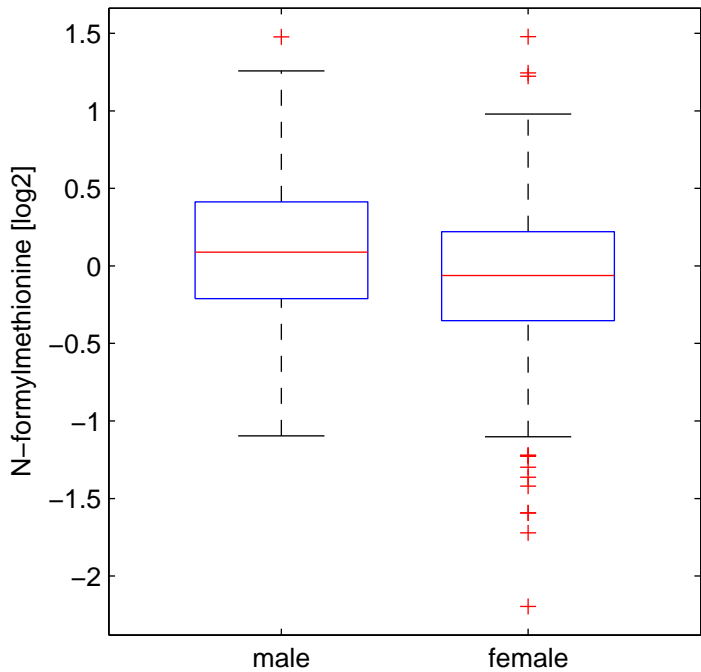

p-val: 2.47e-001

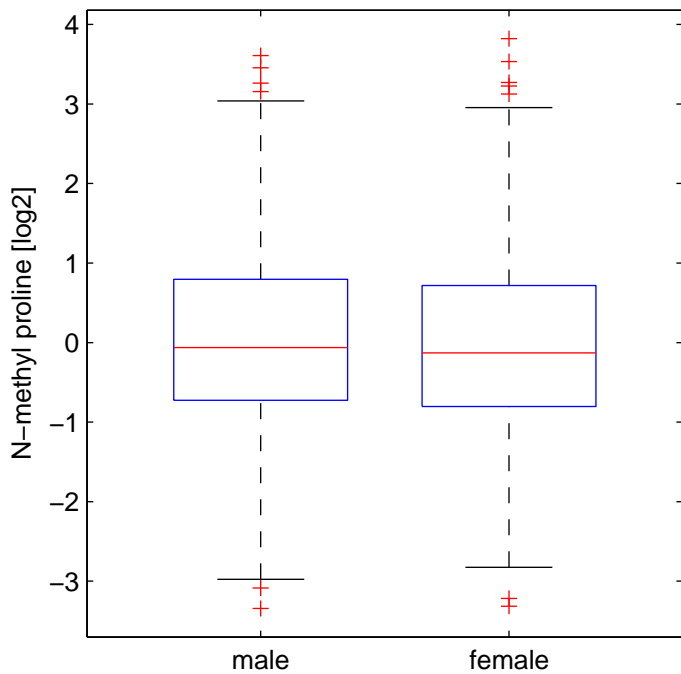



p-val: 8.16e-003

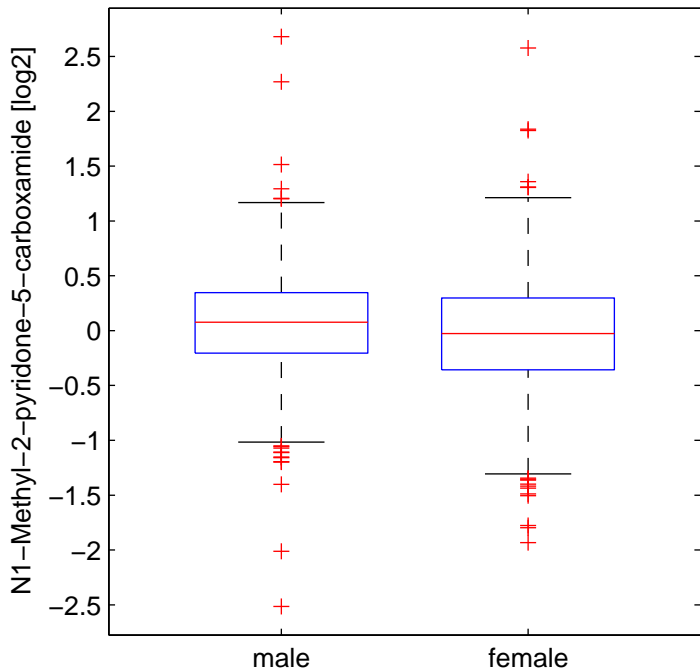

p-val: 5.02e-001

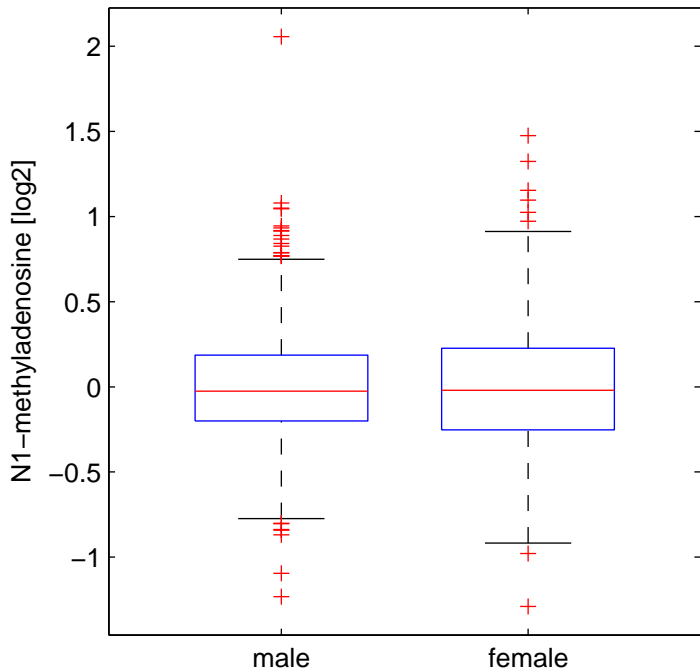

p-val: 4.67e-001

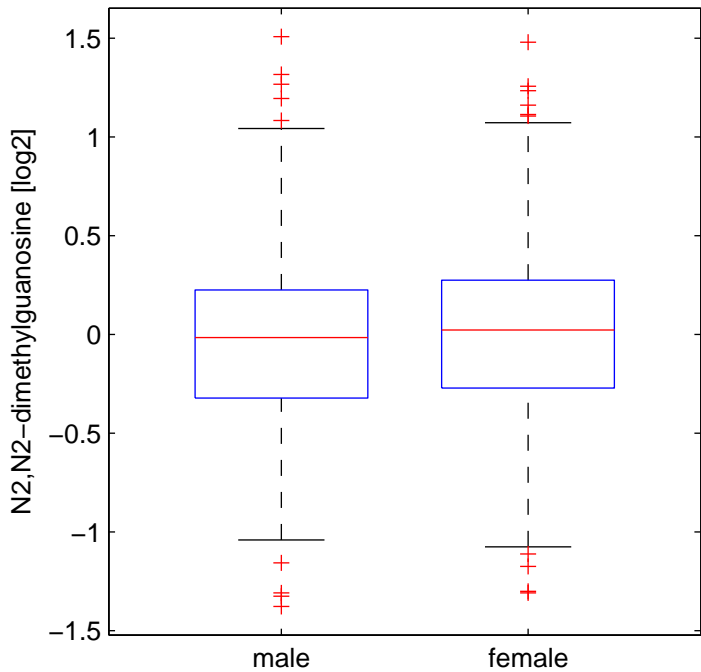

p-val: 1.42e-002

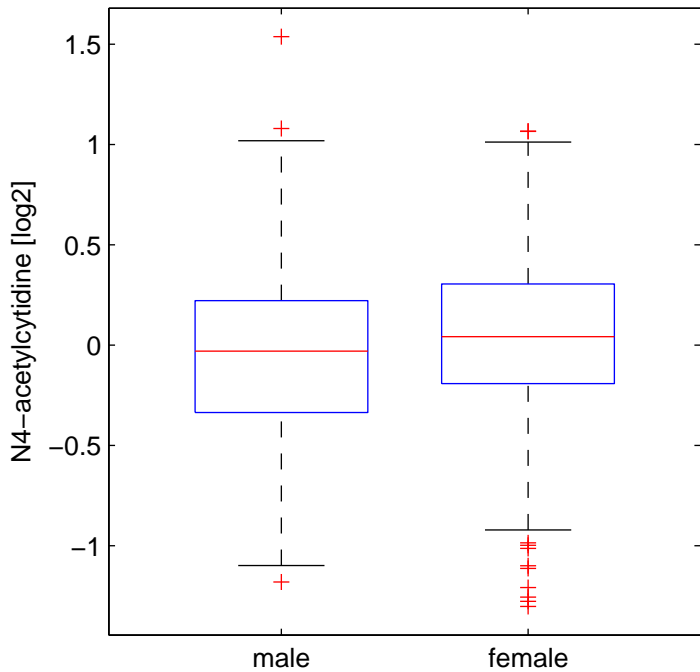

p-val: 9.28e-006

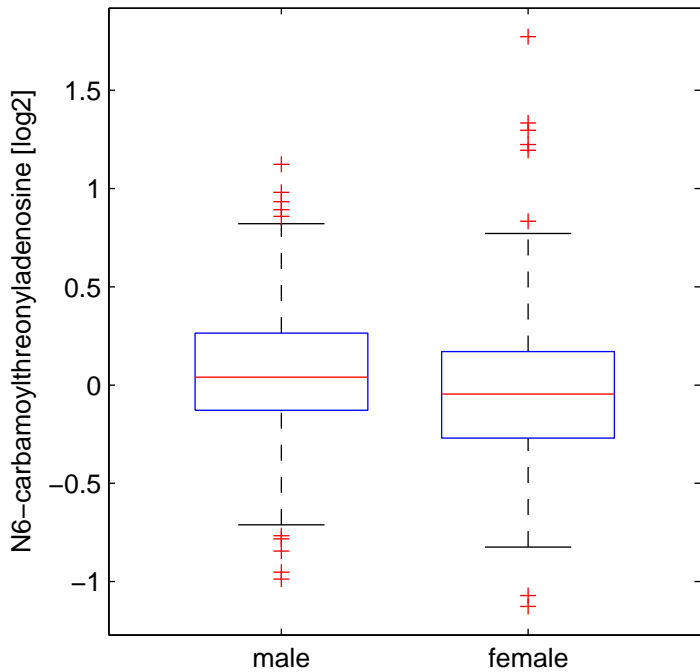

p-val: 9.71e-001

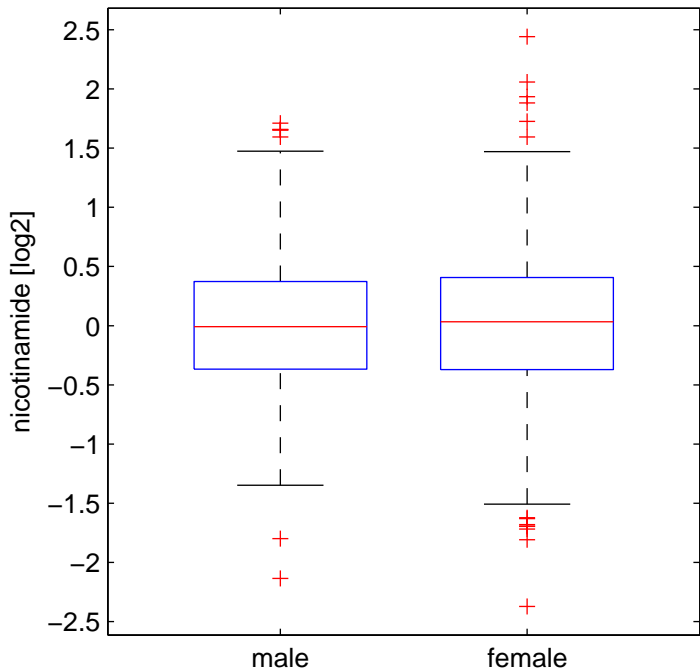

p-val: 1.23e-004

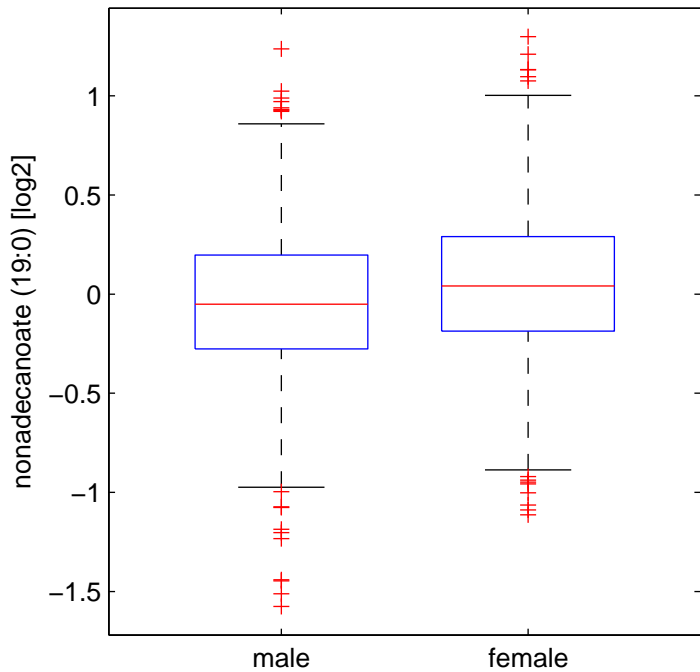

p-val: 8.69e-003

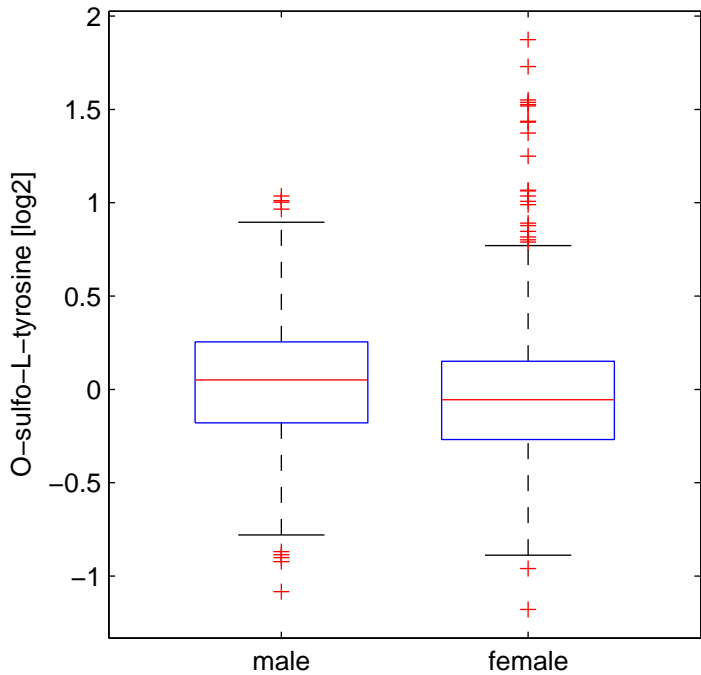



p-val: 5.82e-003

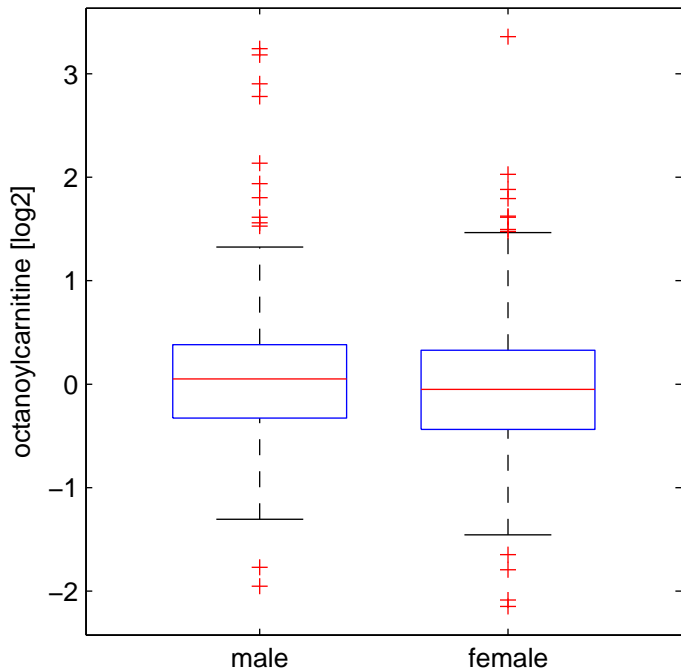

p-val: 5.22e-018

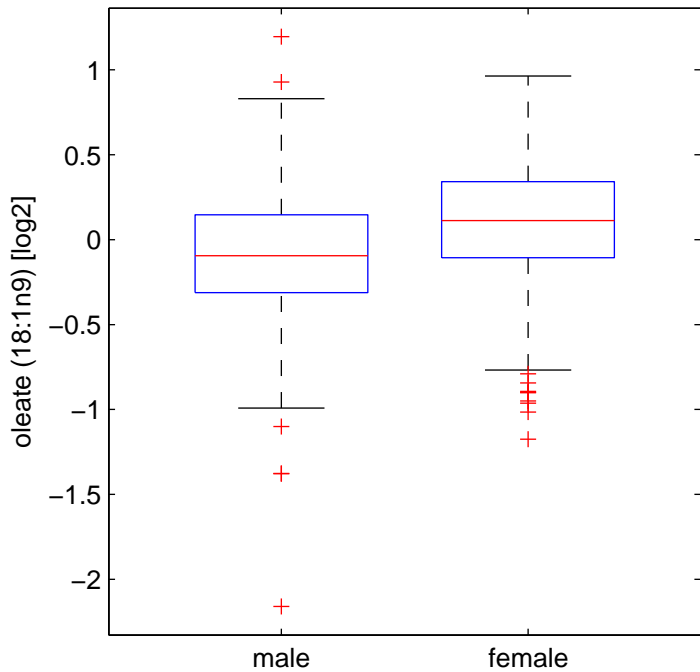

p-val: 3.63e-011

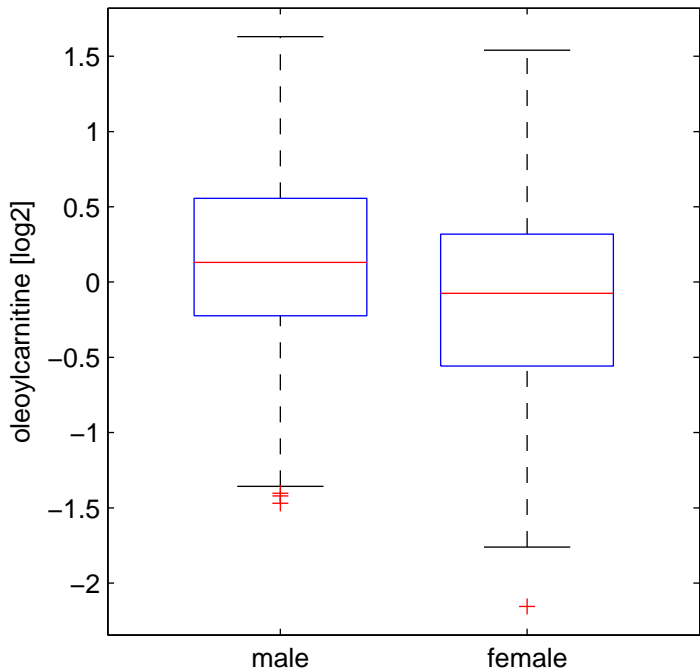

p-val: 3.64e-002

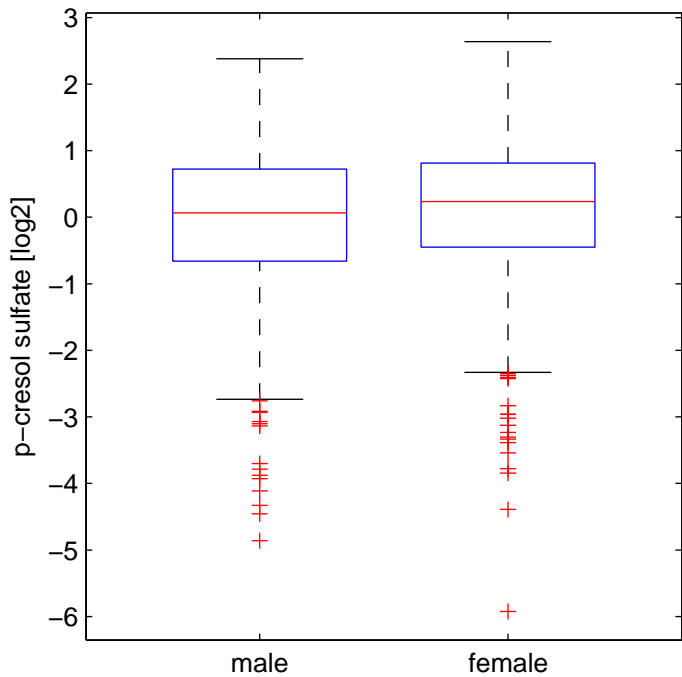

p-val: 3.09e-011

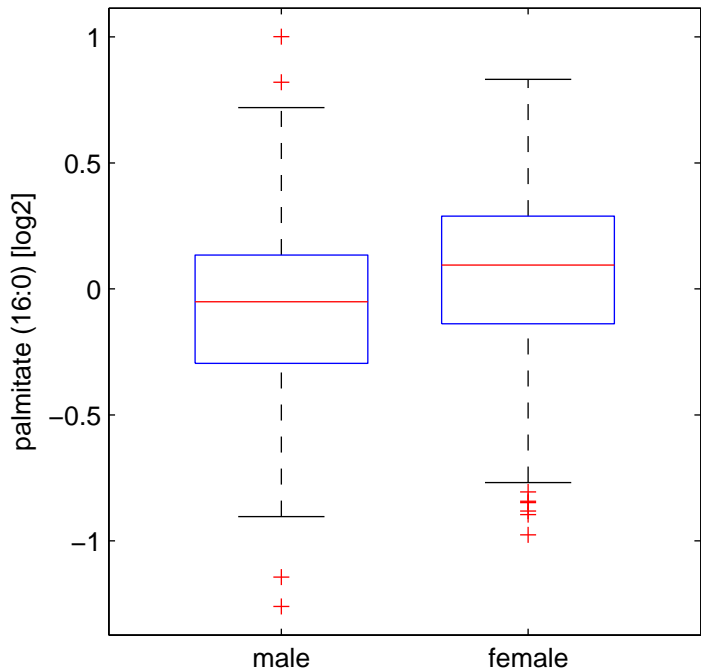

p-val: 2.87e-037

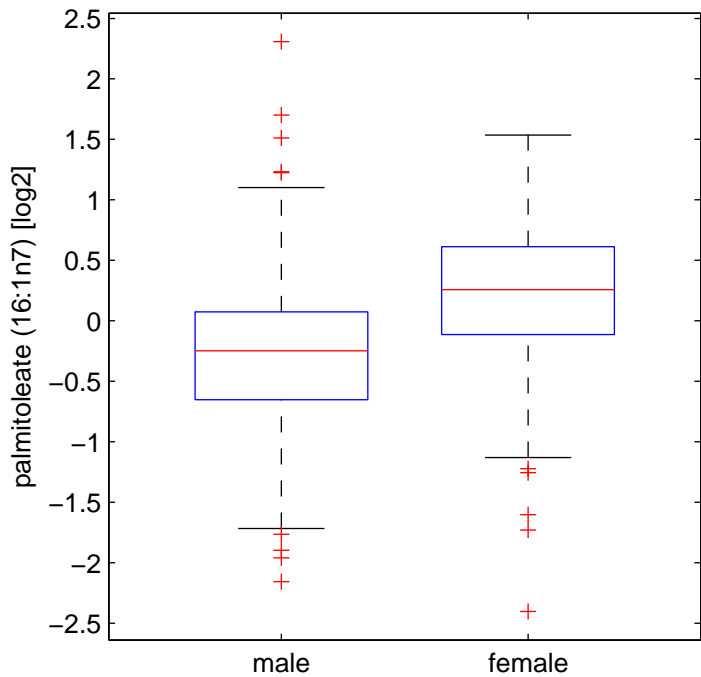

p-val: 3.24e-016

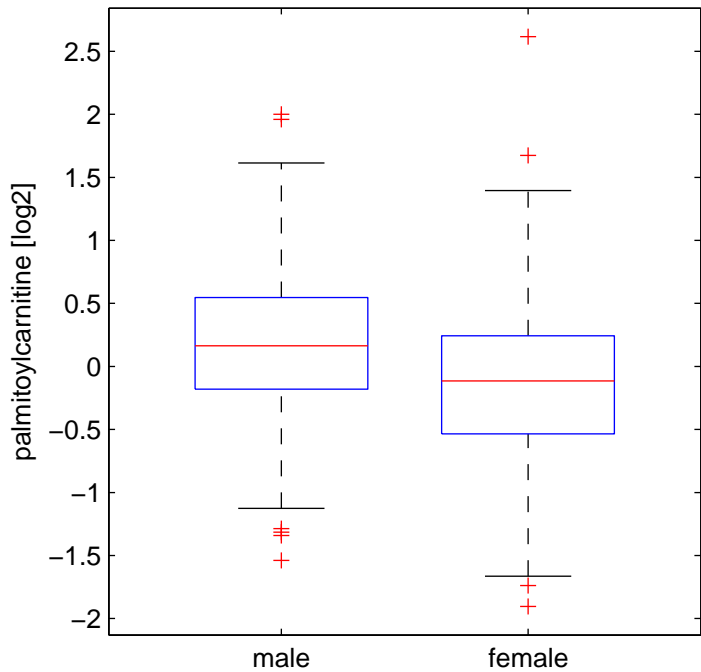

p-val: 4.22e-001

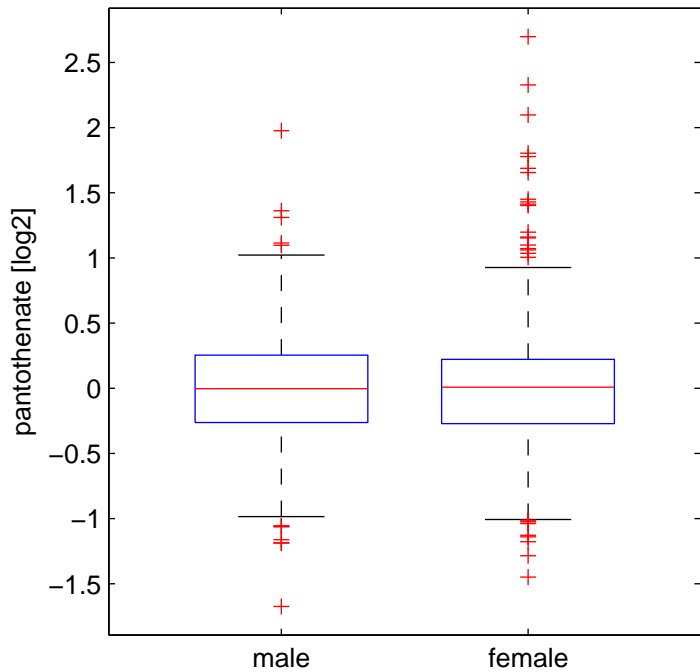



p-val: 1.23e-002

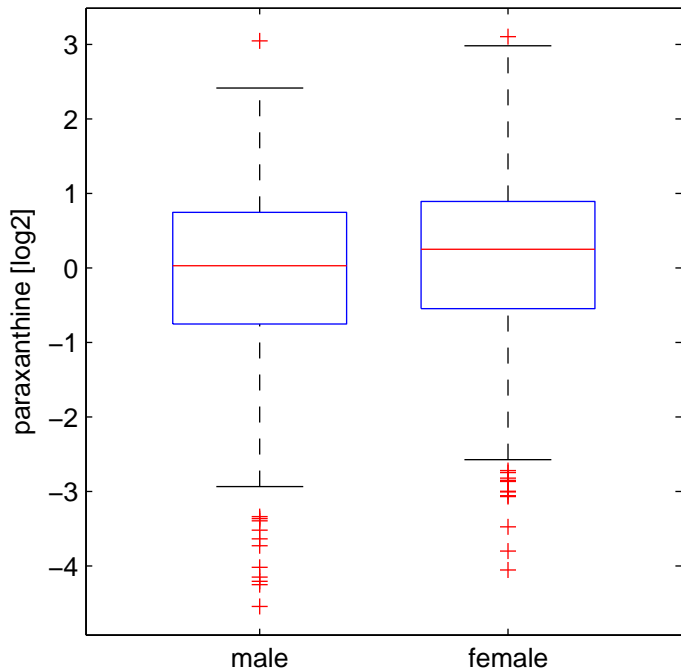

p-val: 9.96e-001

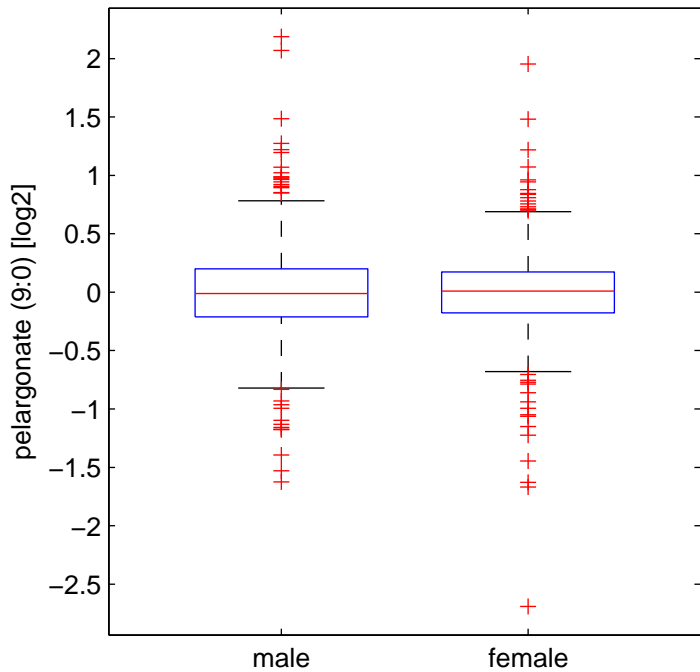

p-val: 2.18e-002

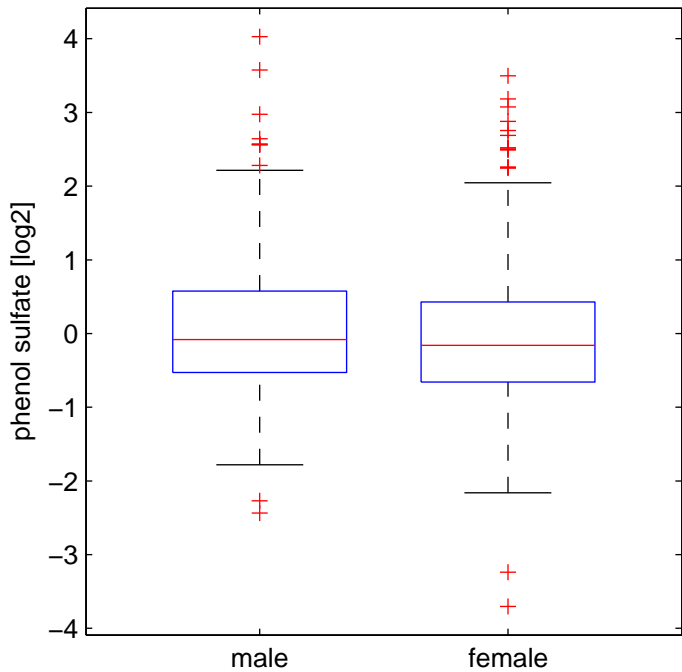

p-val: 4.26e-001

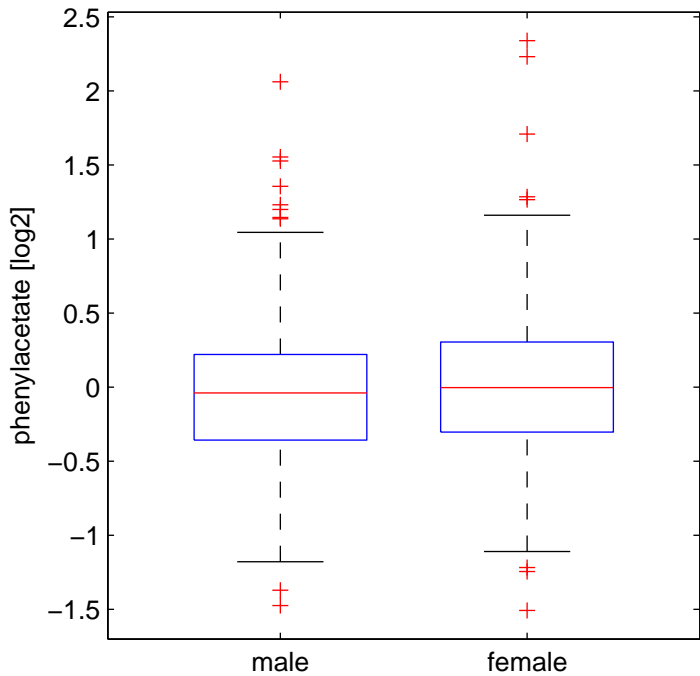

p-val: 5.19e-002

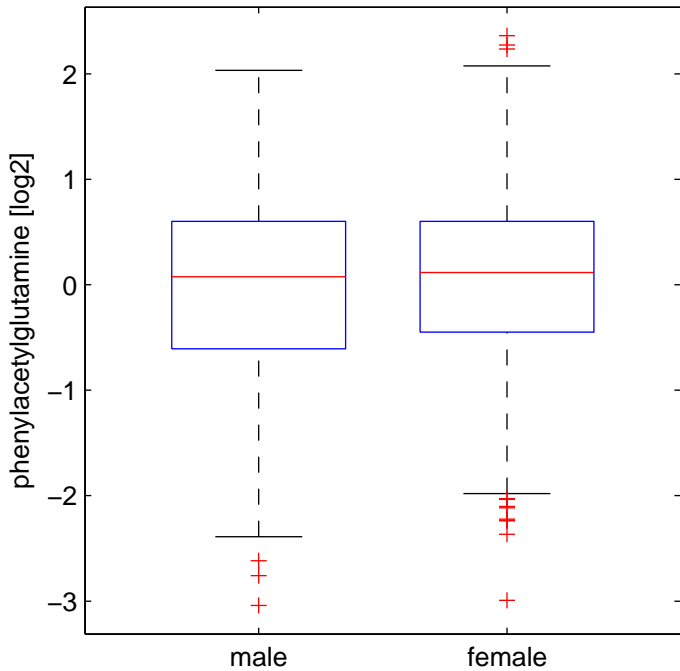

p-val: 1.96e-010

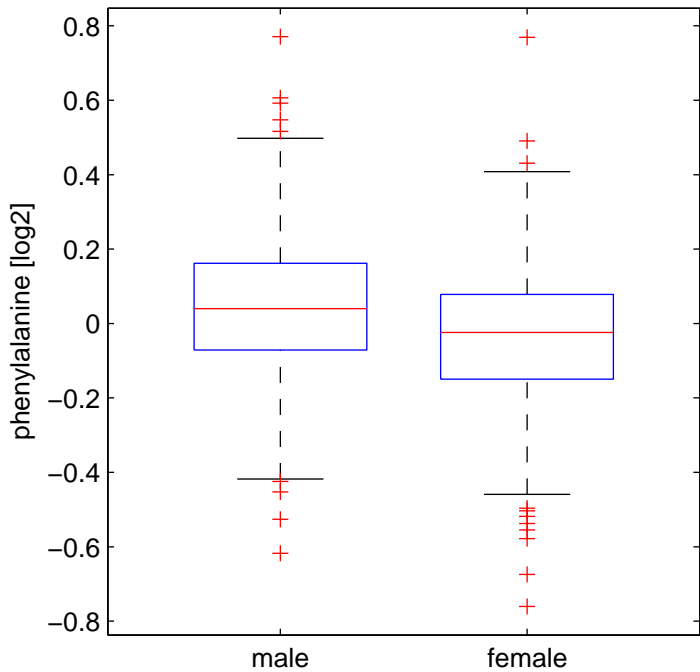

p-val: 3.20e-001

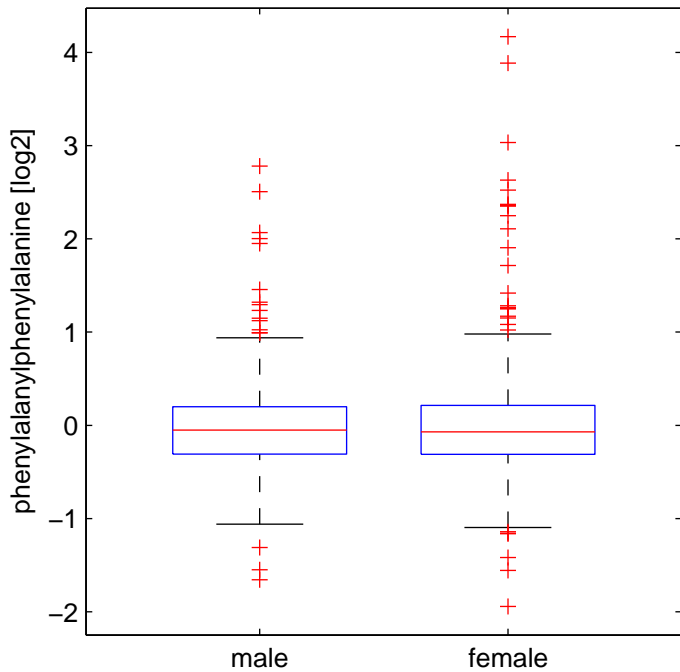

p-val: 9.15e-001

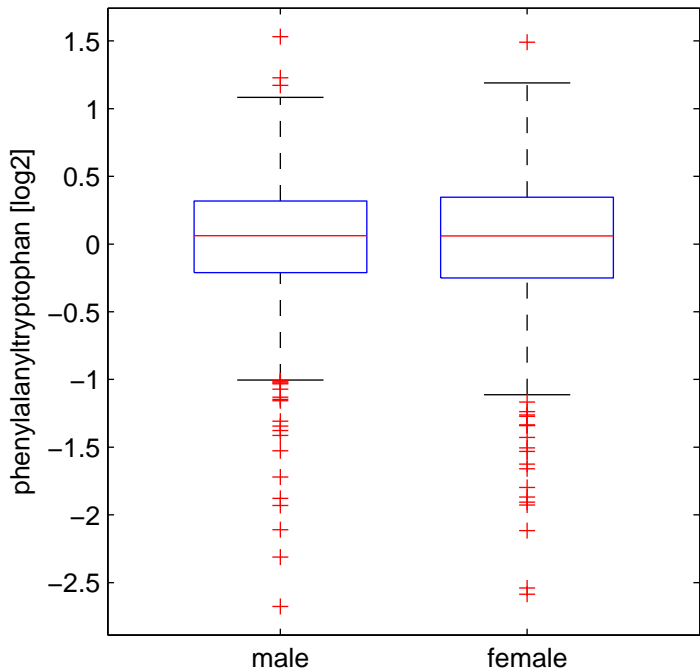



p-val: 2.59e-013

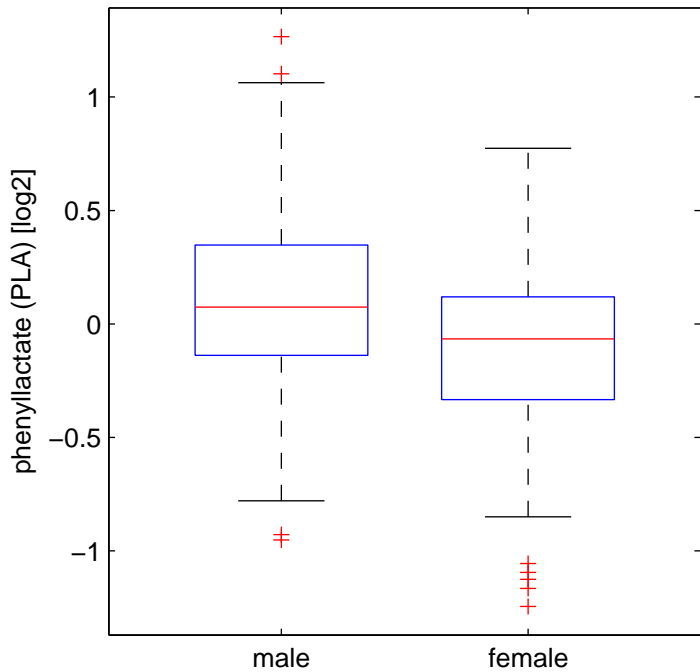

p-val: 1.83e-019

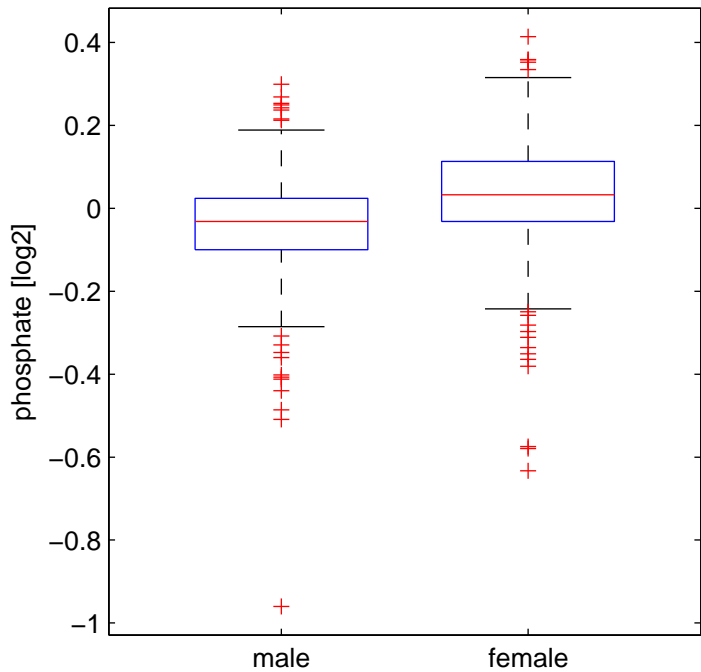

p-val: 2.03e-001

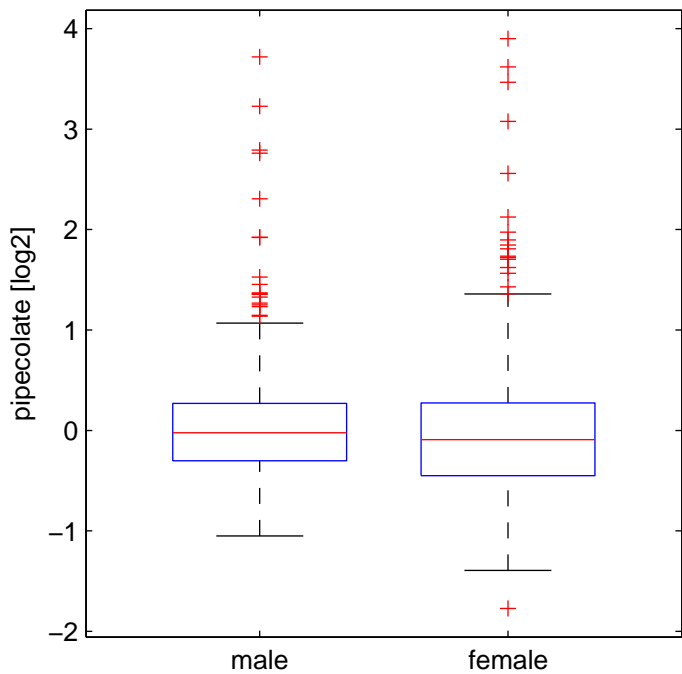

p-val: 2.14e-002

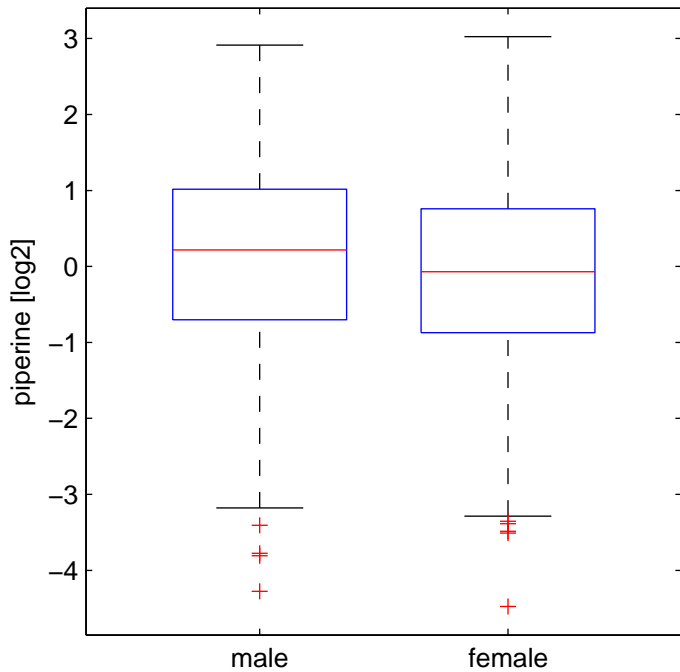

p-val: 1.16e-064

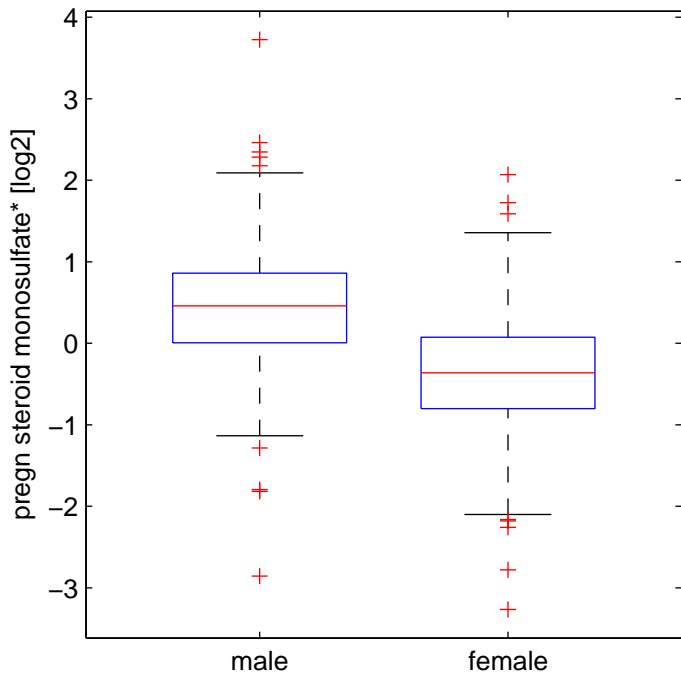

p-val: 1.52e-002

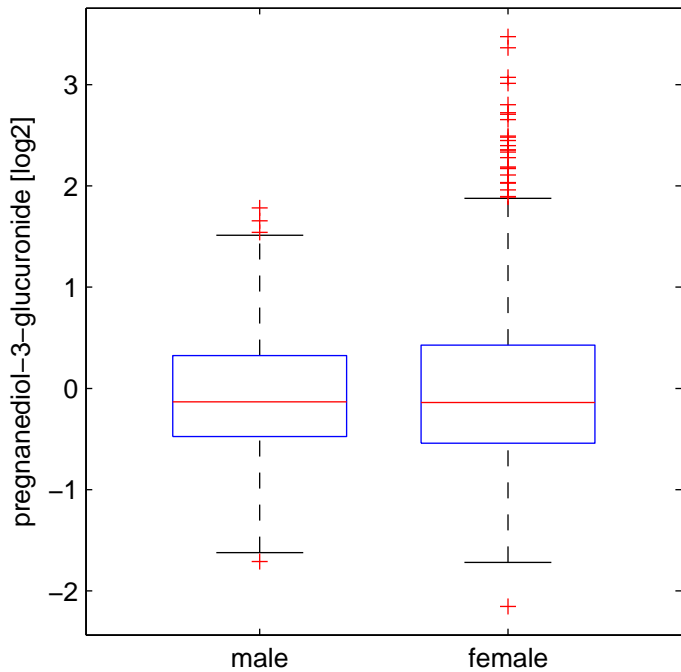

p-val: 3.66e-060

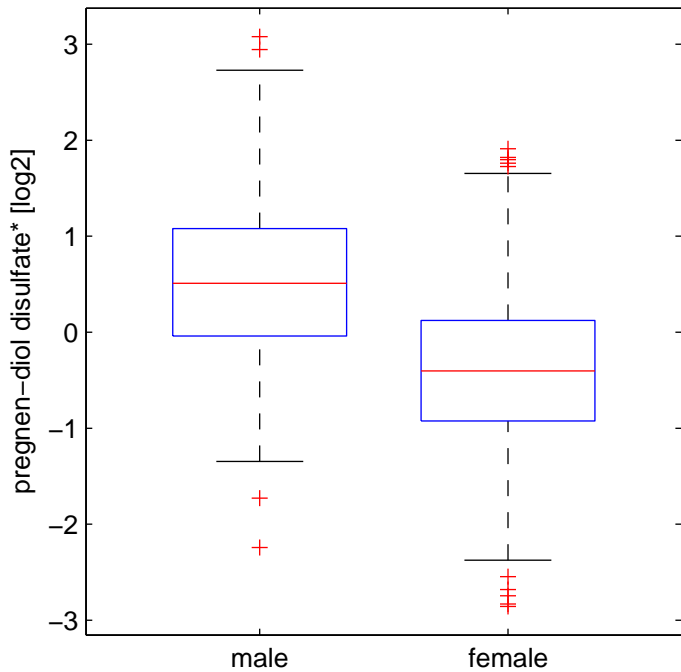

p-val: 1.28e-032

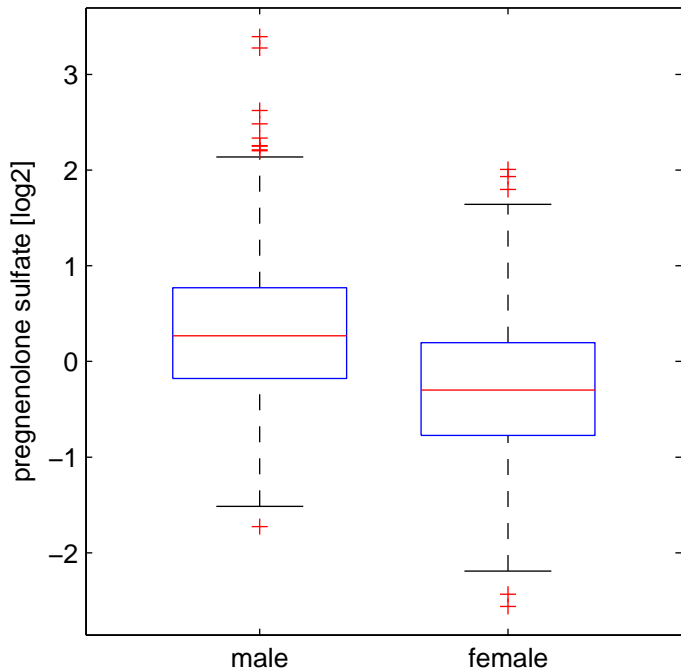



p-val: 3.16e-003

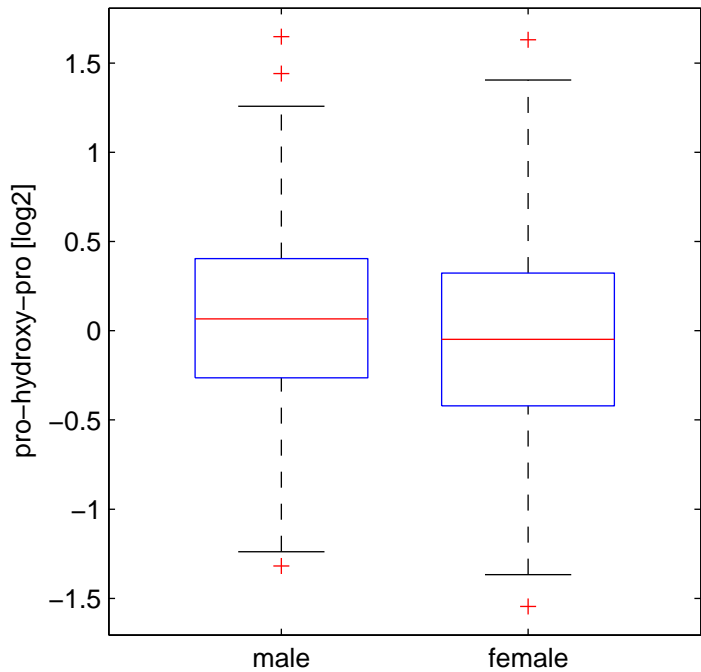

p-val: 2.83e-028

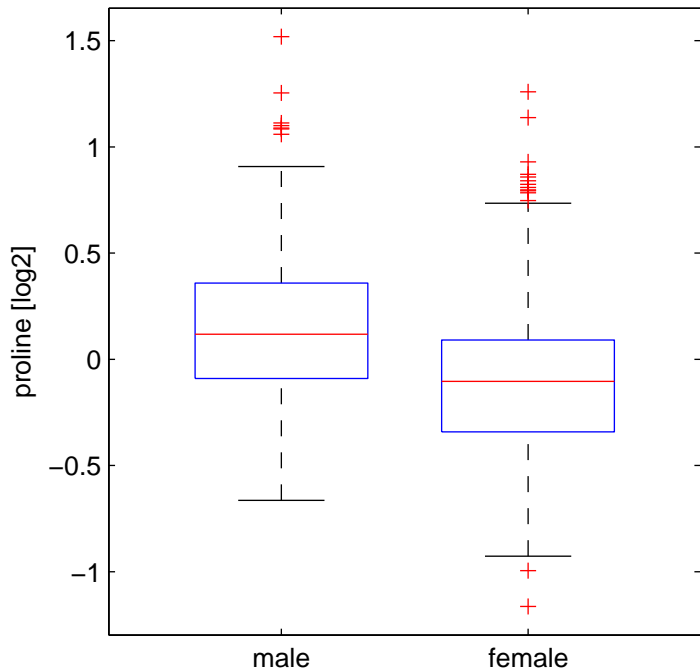

p-val:  $9.27e-036$

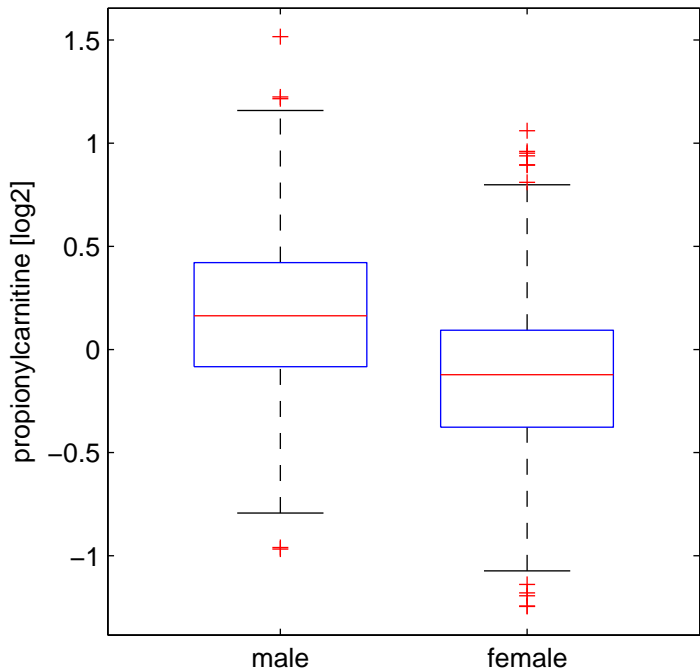

p-val: 2.61e-001

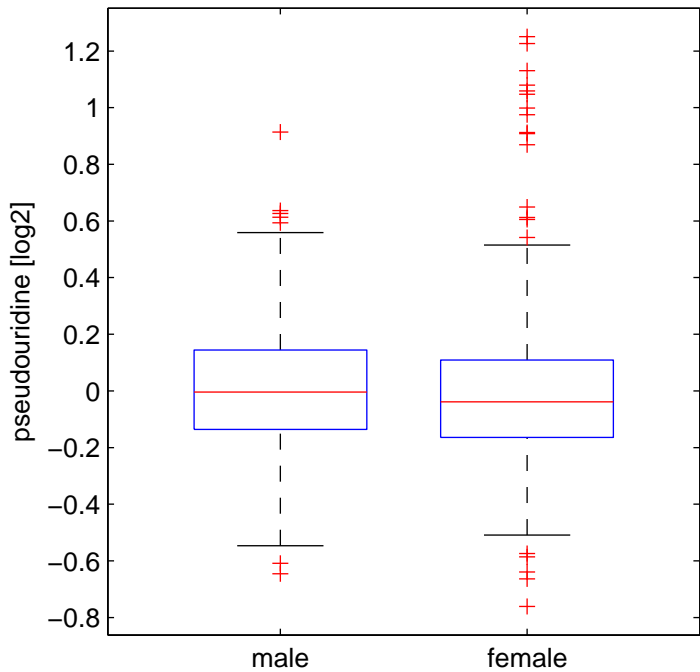

p-val: 4.57e-001

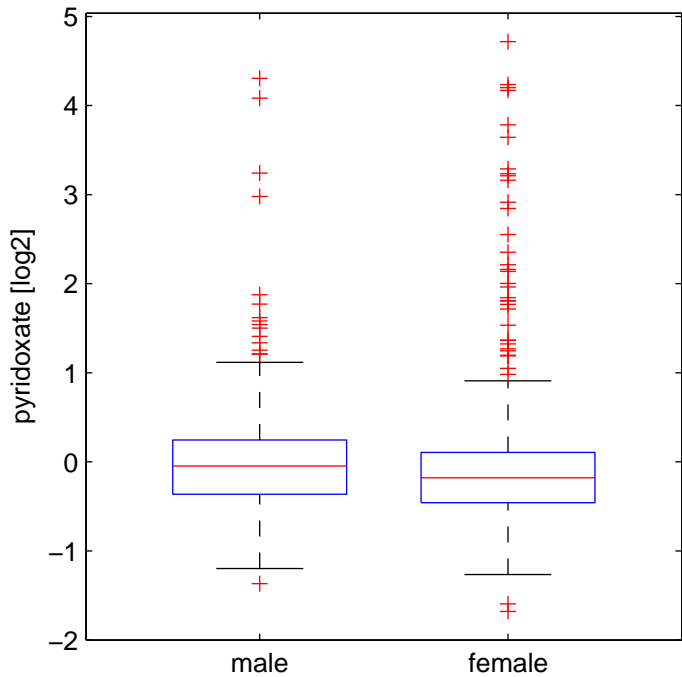

p-val: 1.92e-095

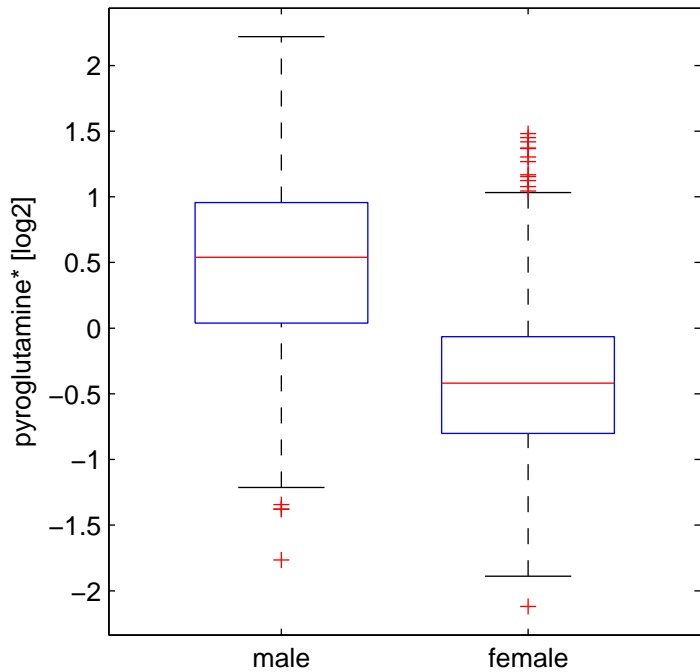

p-val: 1.88e-001

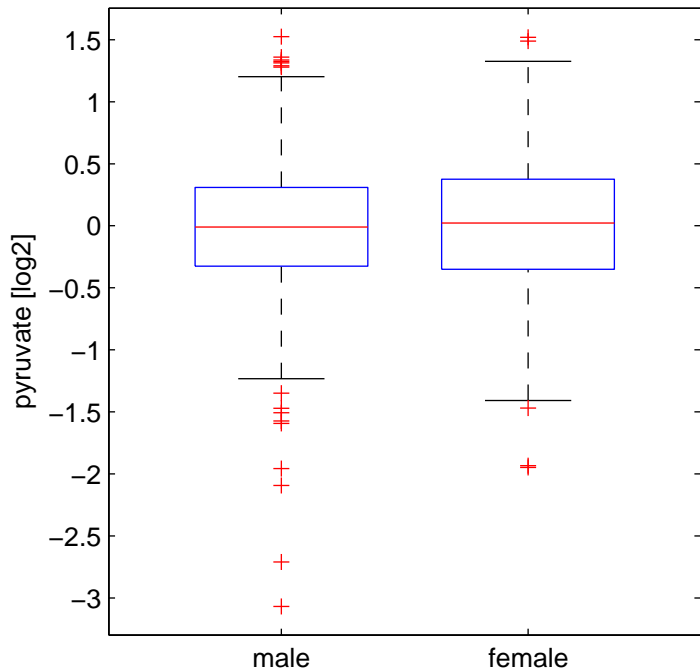

p-val: 9.07e-001

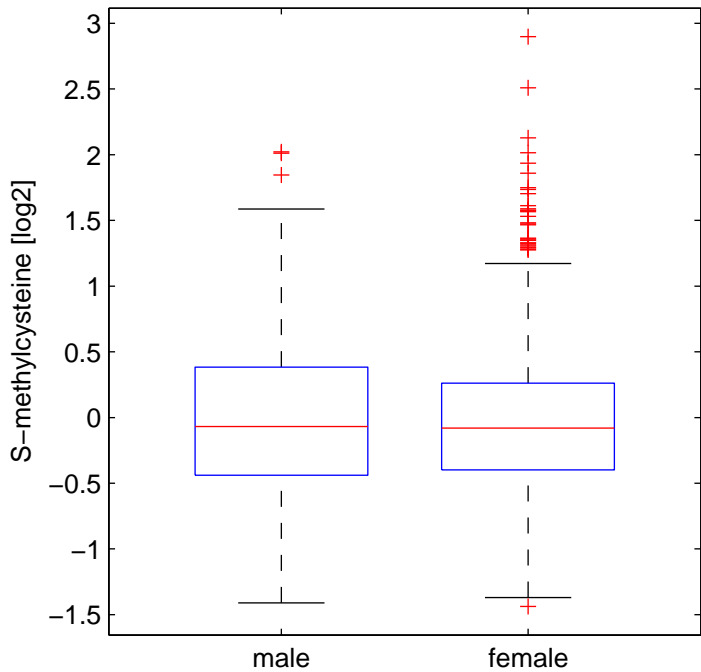



p-val: 7.97e-001

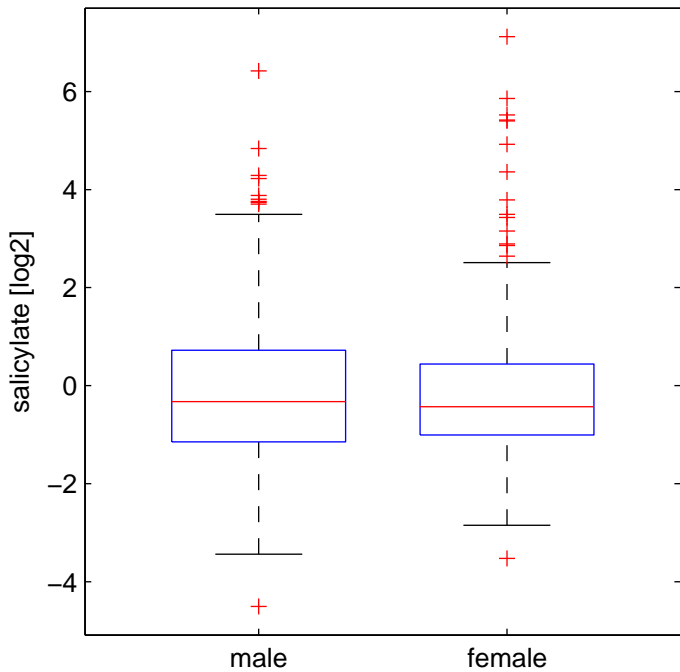

p-val: 6.84e-001

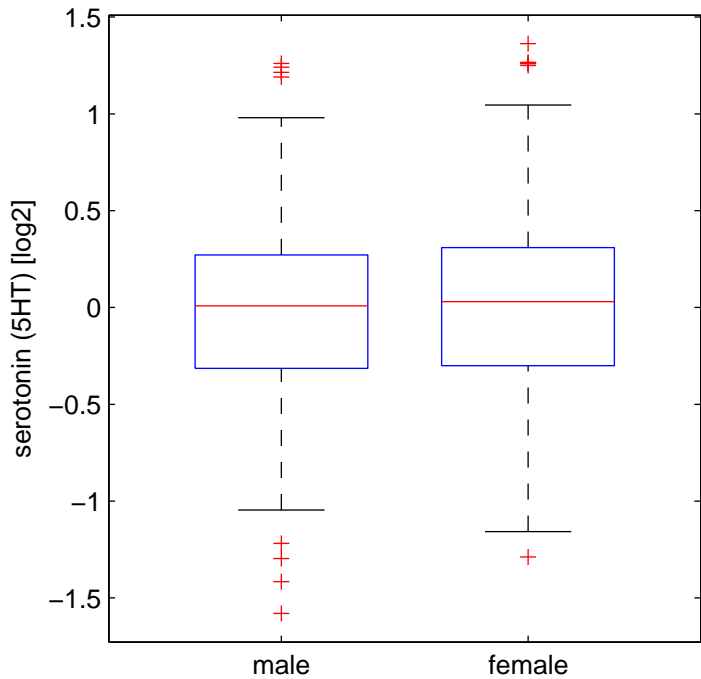

p-val: 5.22e-001

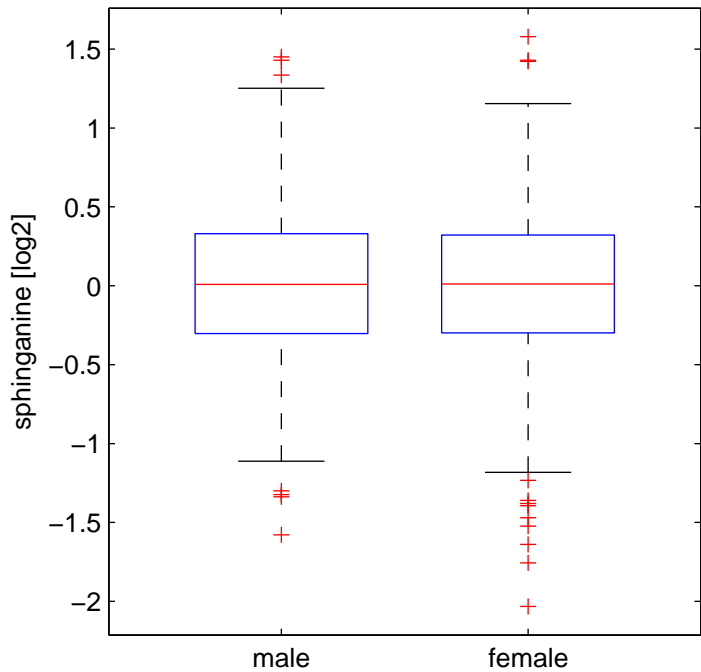

p-val: 2.10e-002

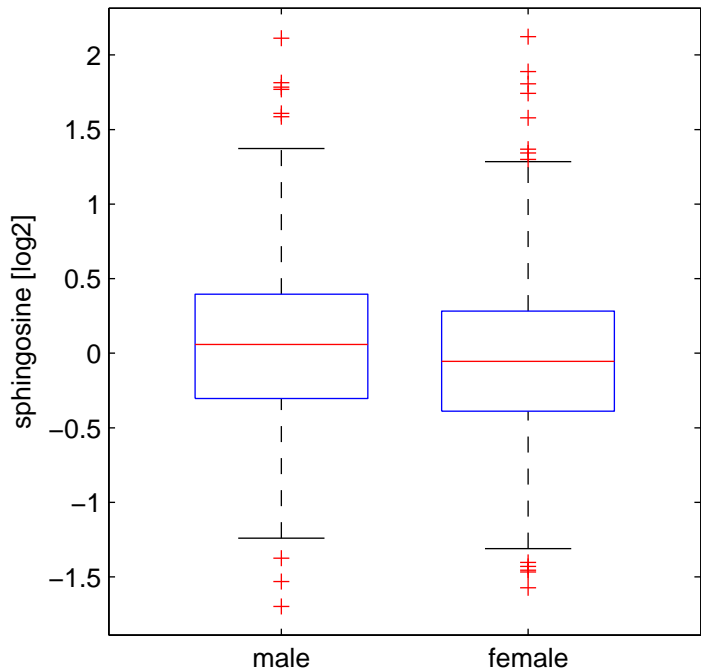

p-val: 6.40e-001

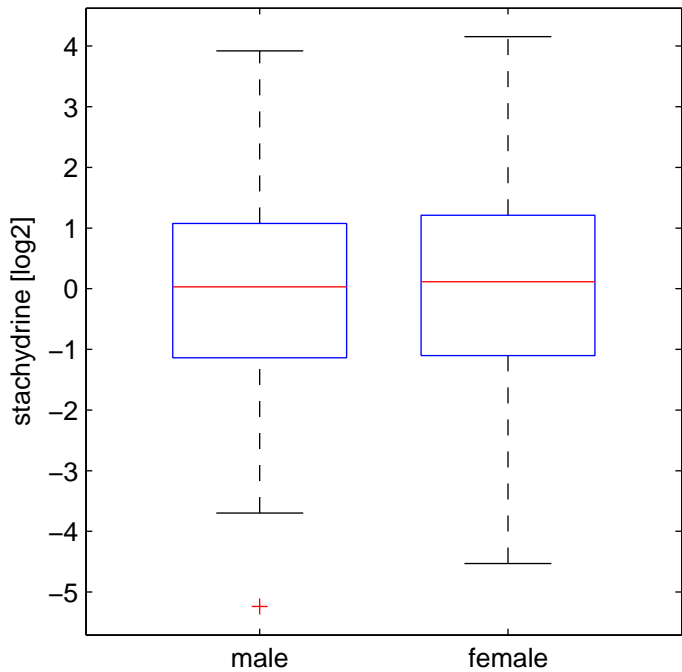

p-val: 2.85e-004

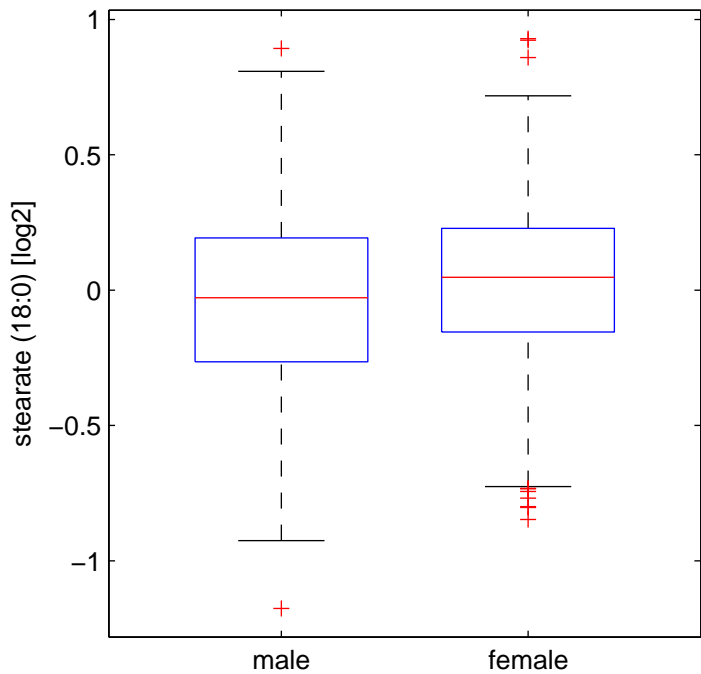

p-val: 1.17e-022

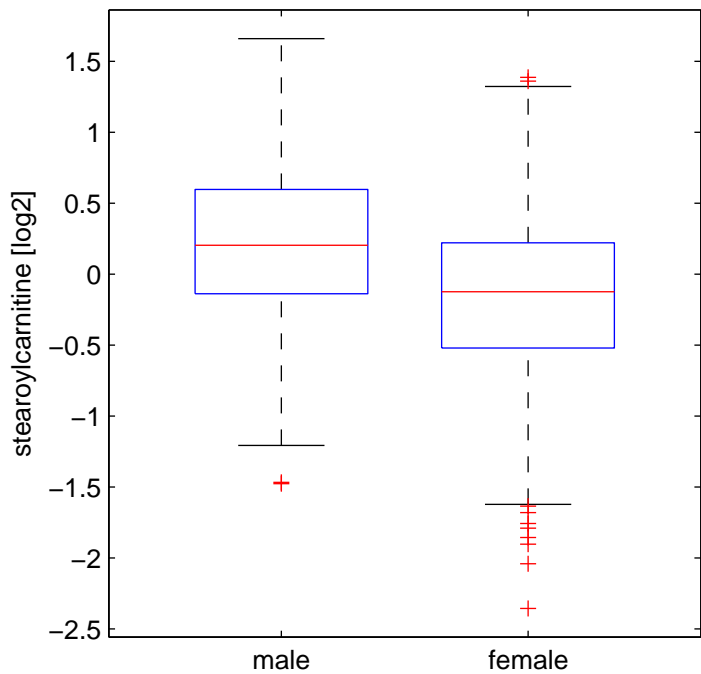

p-val: 9.23e-005

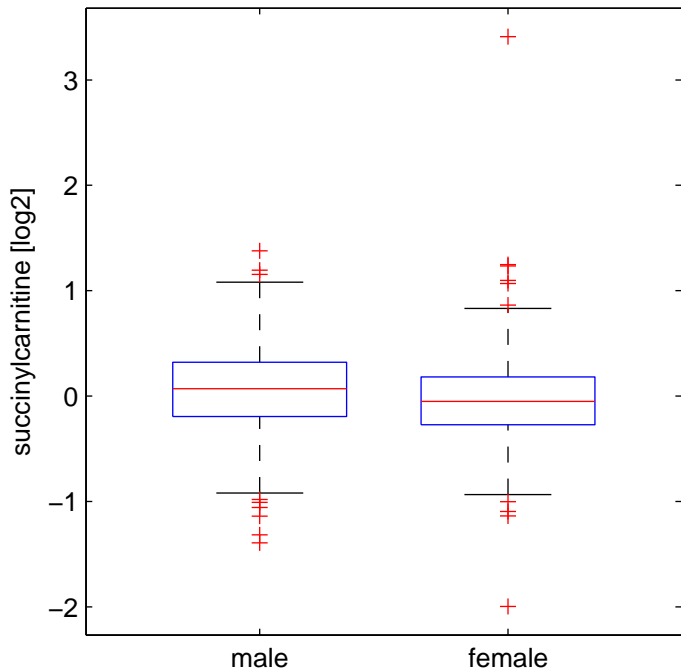



p-val: 5.64e-001

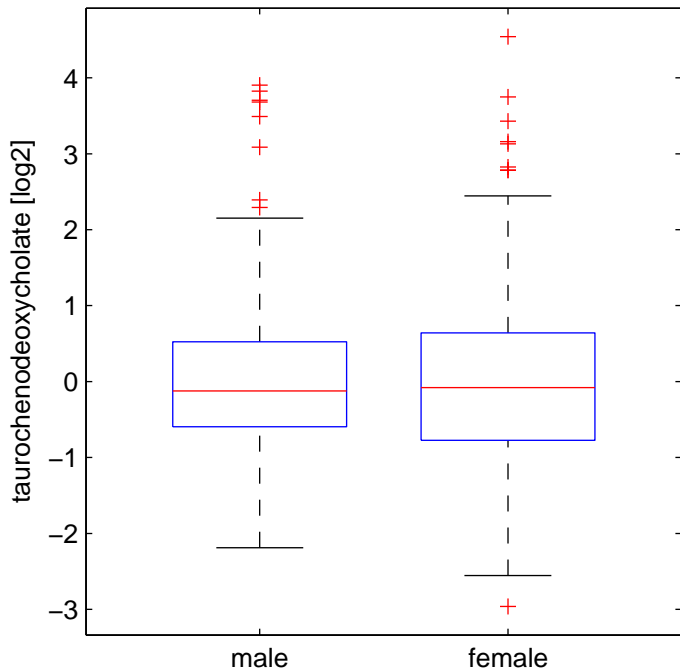

p-val: 3.80e-001

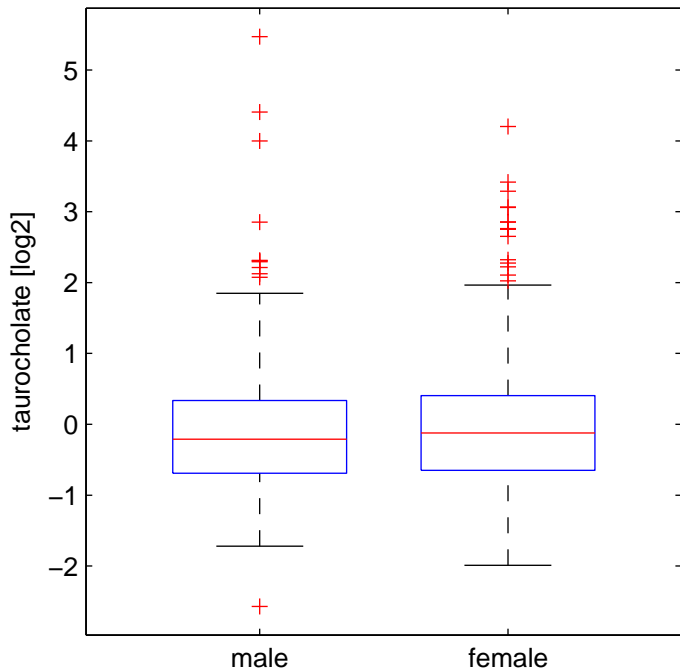

p-val: 1.33e-001

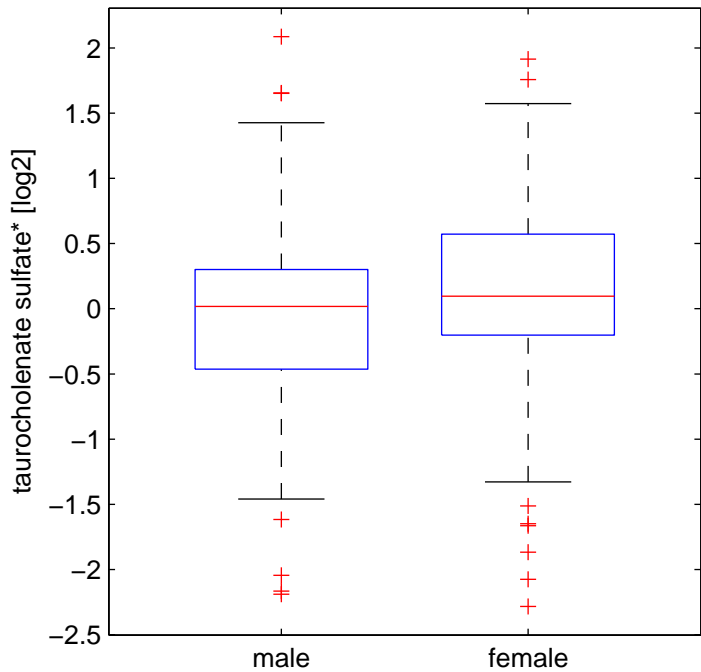

p-val: 5.38e-001

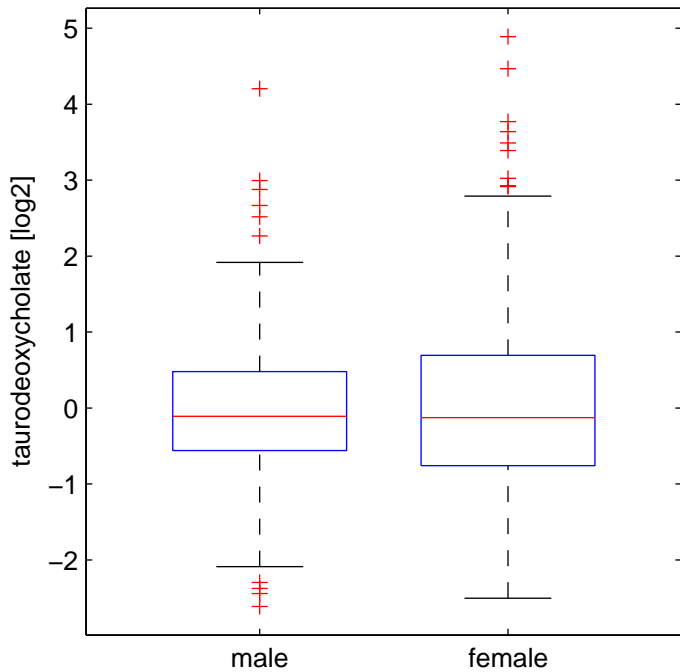

p-val: 1.19e-005

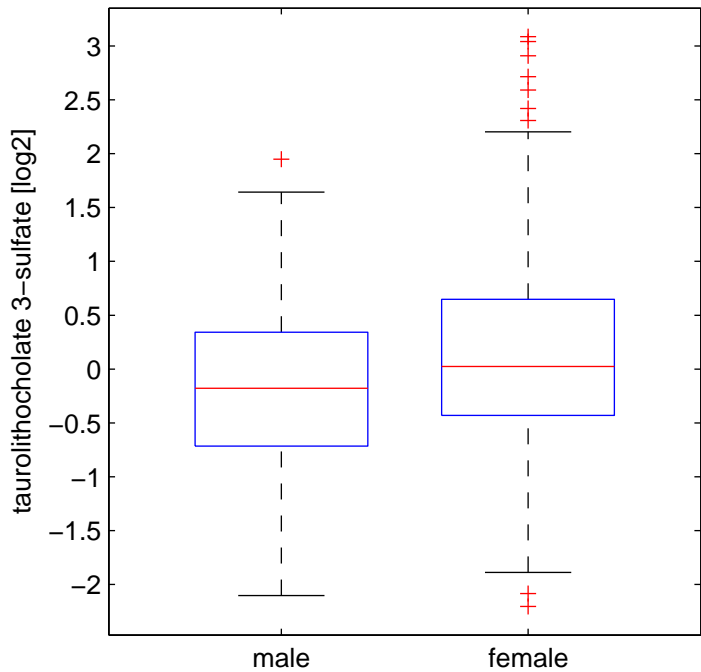

p-val: 7.51e-001

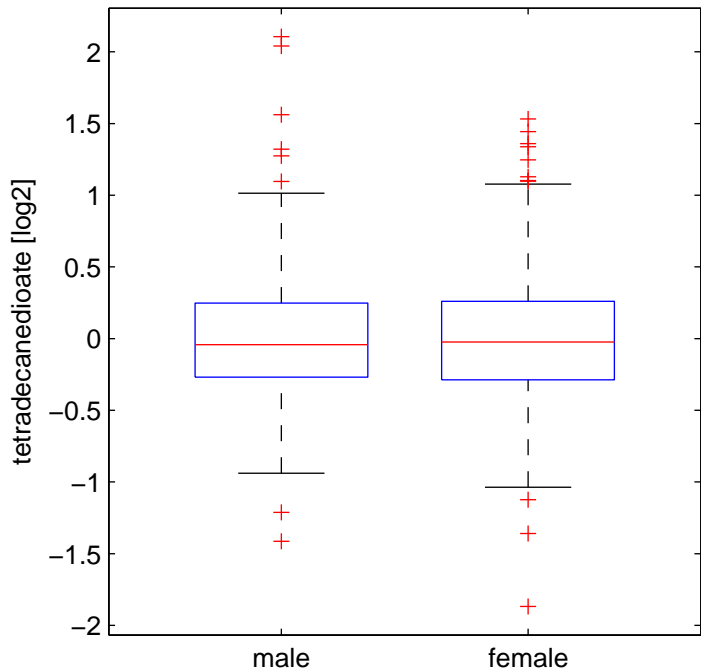

p-val: 8.94e-002

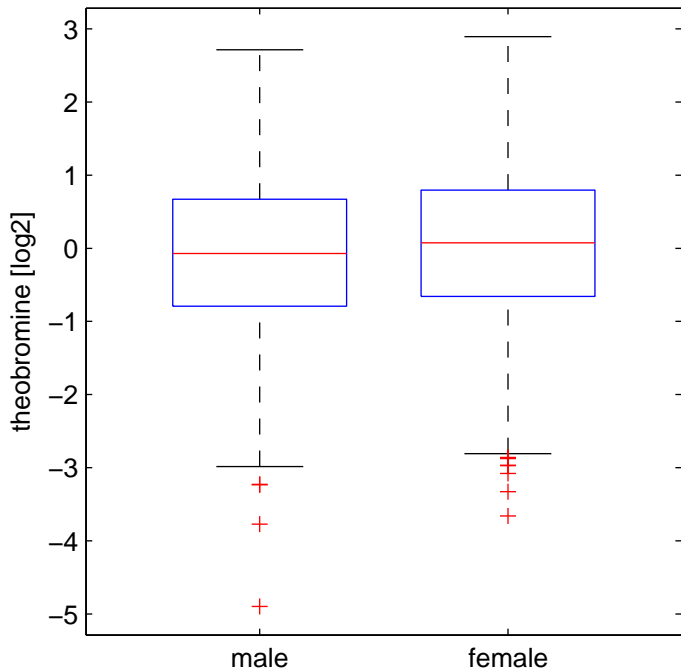

p-val: 4.35e-004

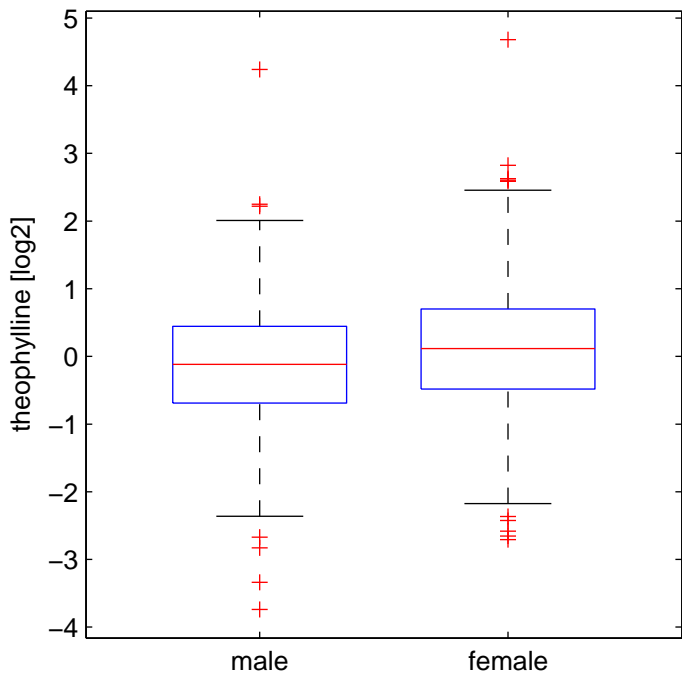



p-val: 1.55e-002

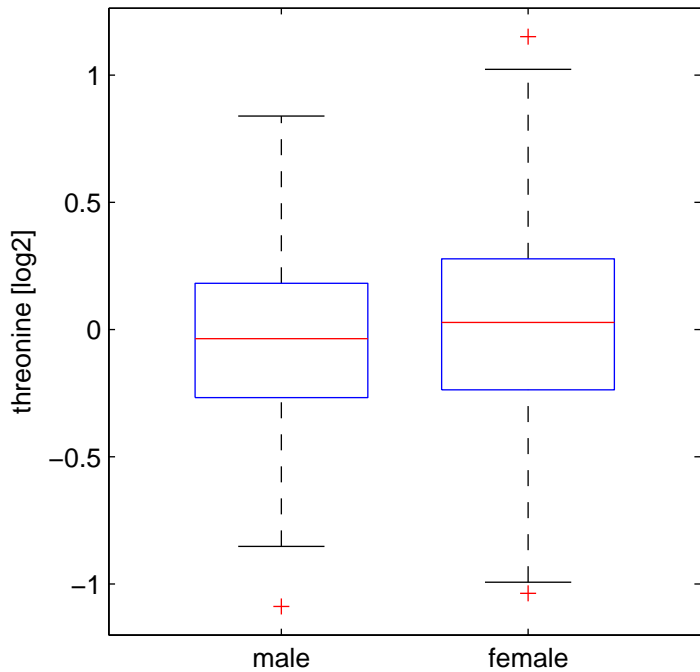

p-val: 1.66e-001

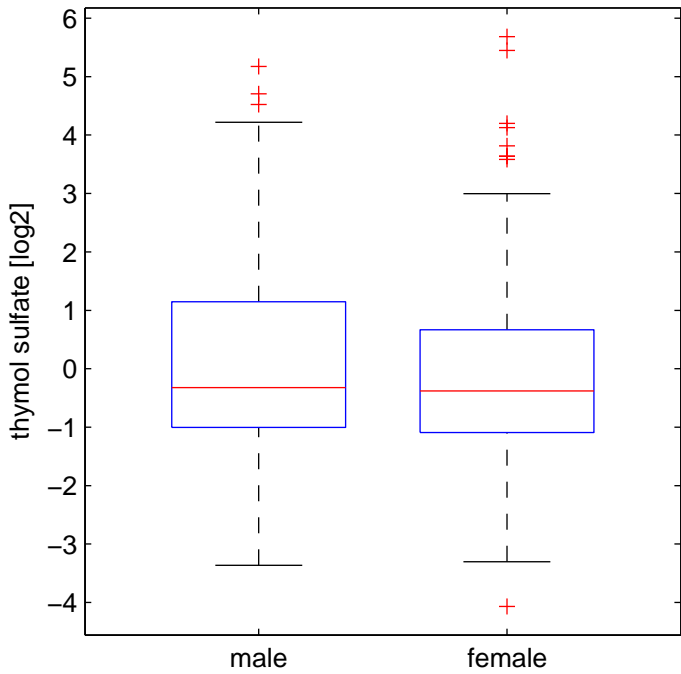

p-val: 6.66e-001

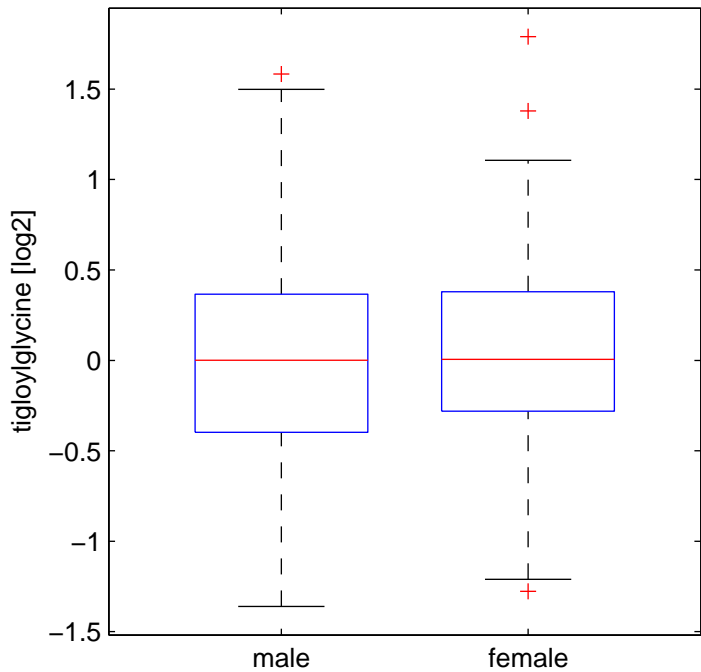

p-val: 6.50e-012

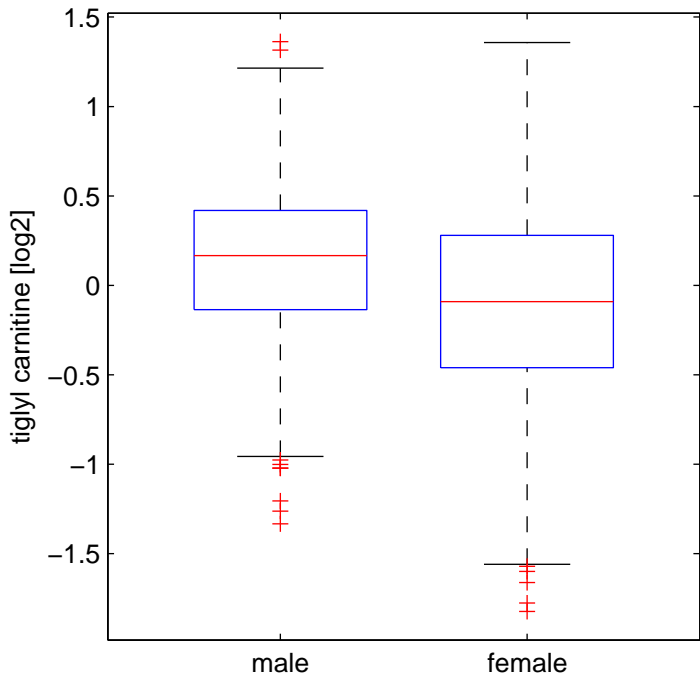

p-val: 5.00e-006

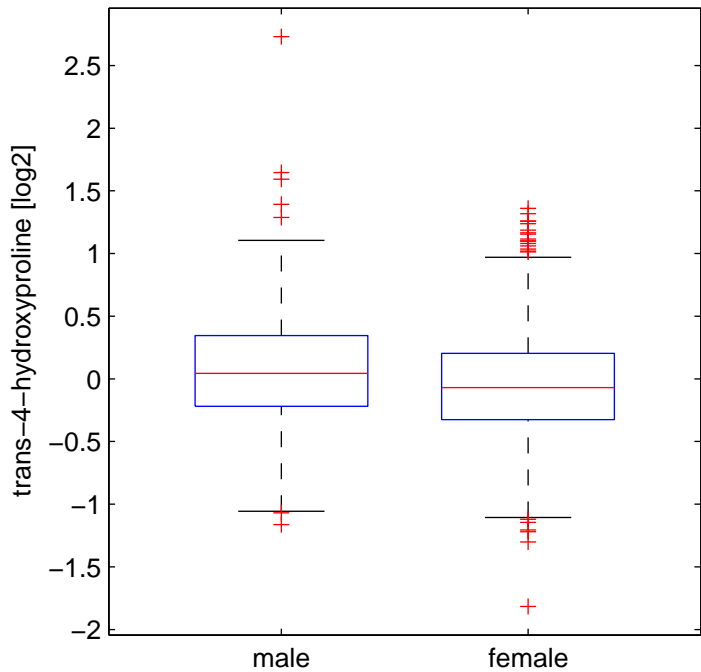

p-val: 2.25e-005

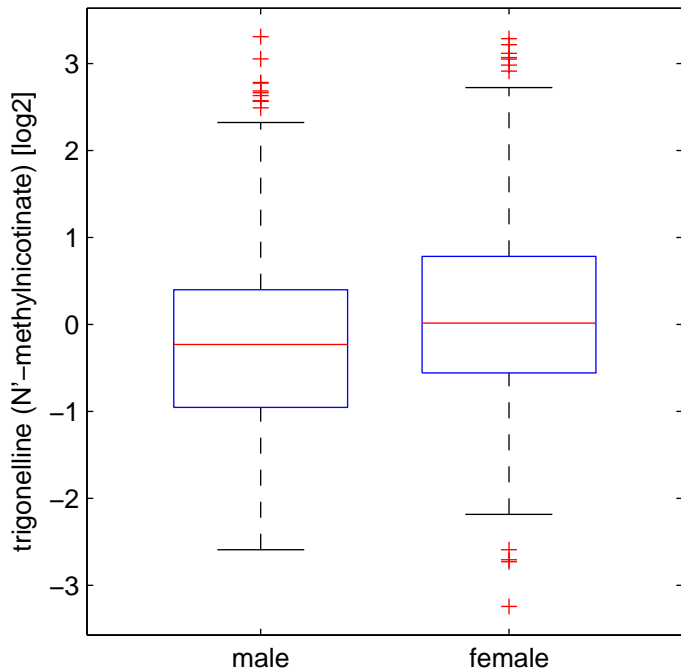

p-val:  $8.45e-017$

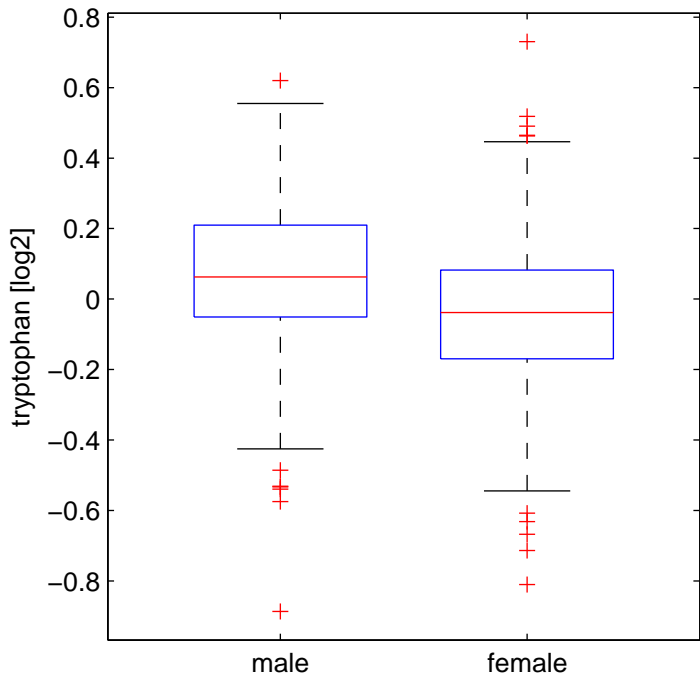

p-val: 6.41e-001

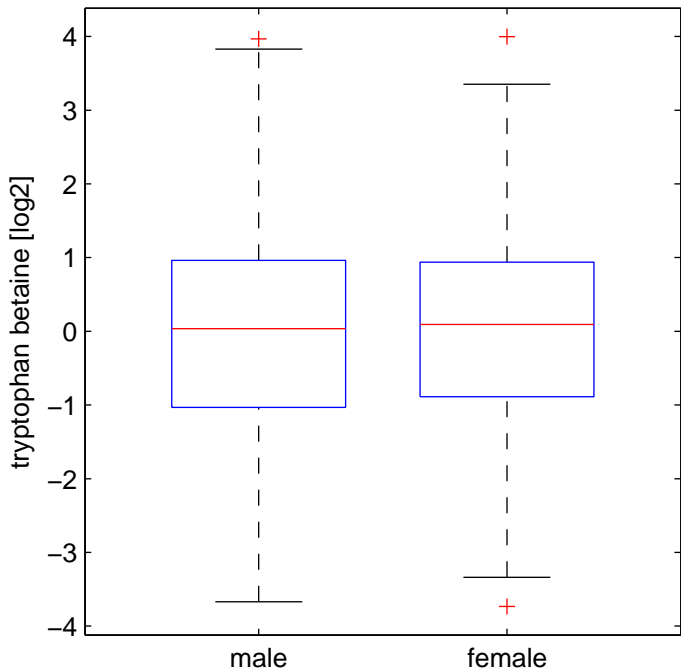



p-val: 5.92e-011

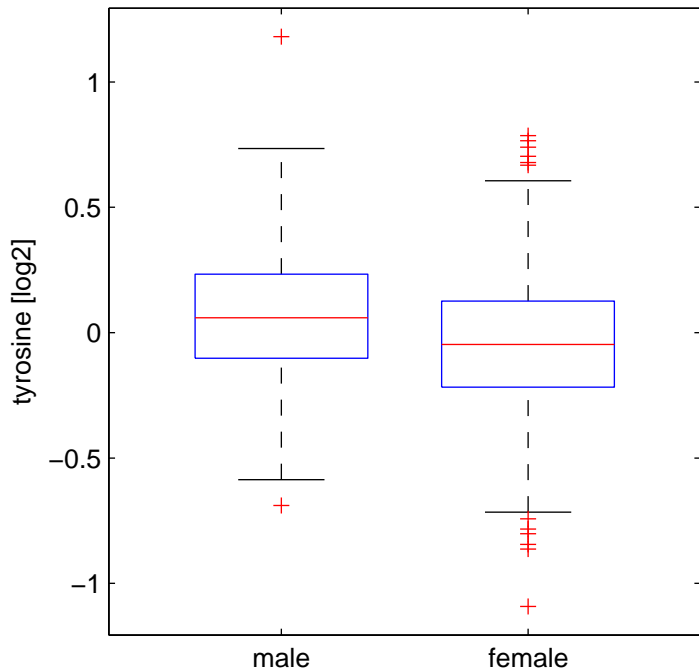

p-val: 1.08e-052

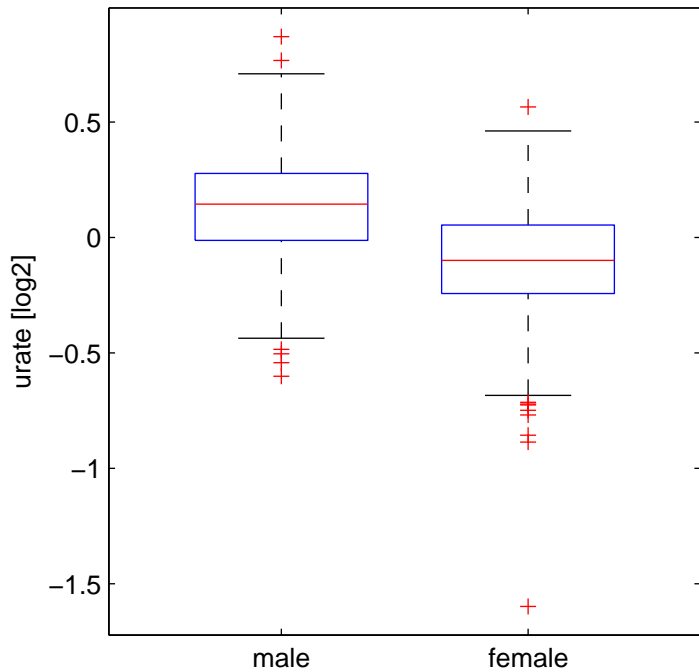

p-val: 2.36e-014

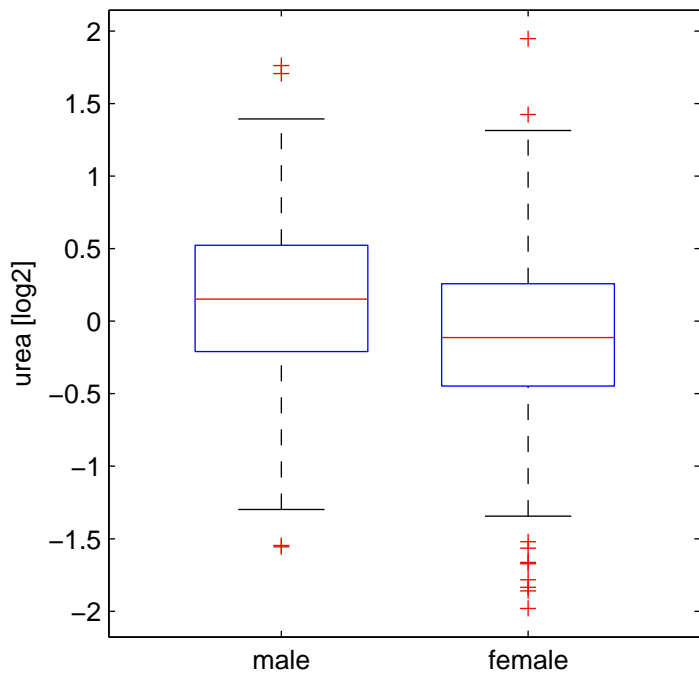

p-val: 2.86e-002

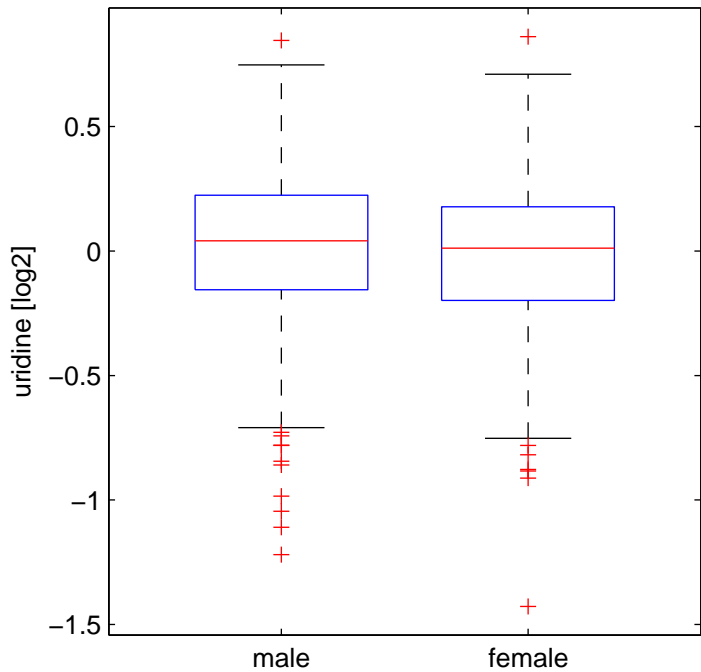

p-val:  $9.27e-039$

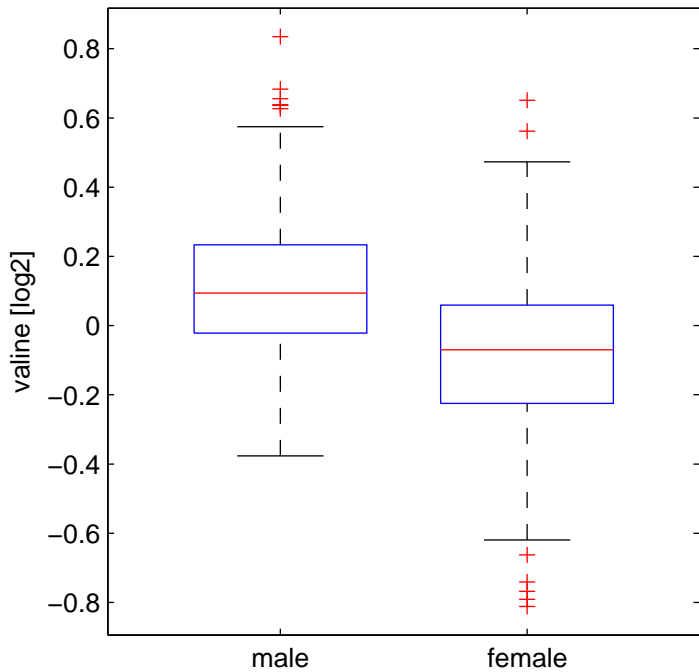

p-val: 3.39e-003

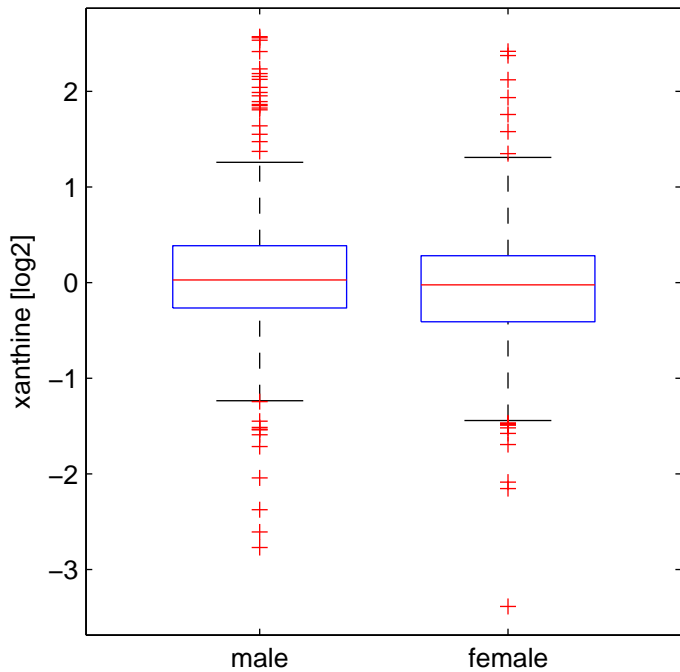

p-val: 5.64e-002

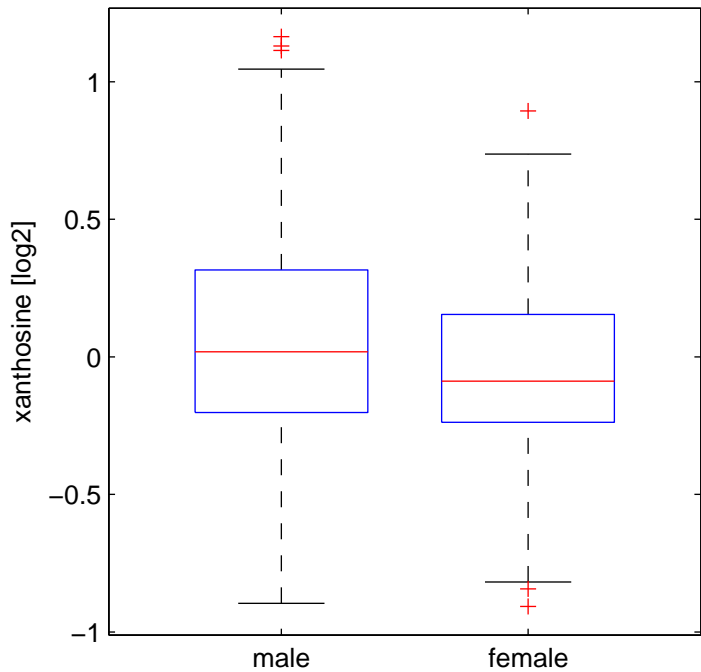

p-val:  $8.69\text{e-}007$

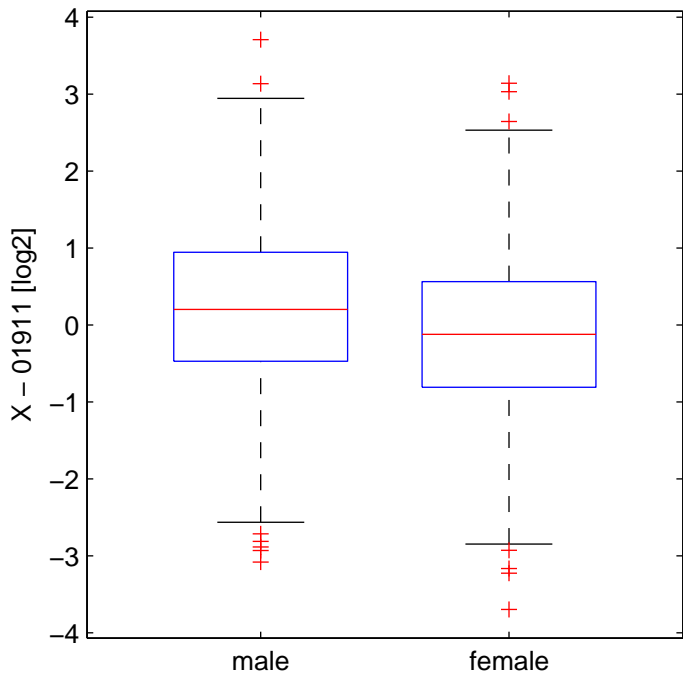



p-val: 5.73e-001

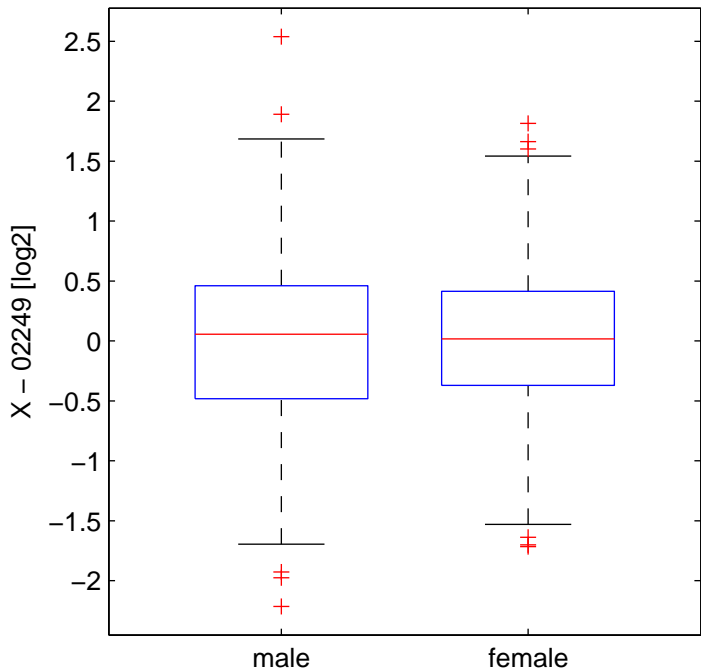

p-val: 1.07e-001

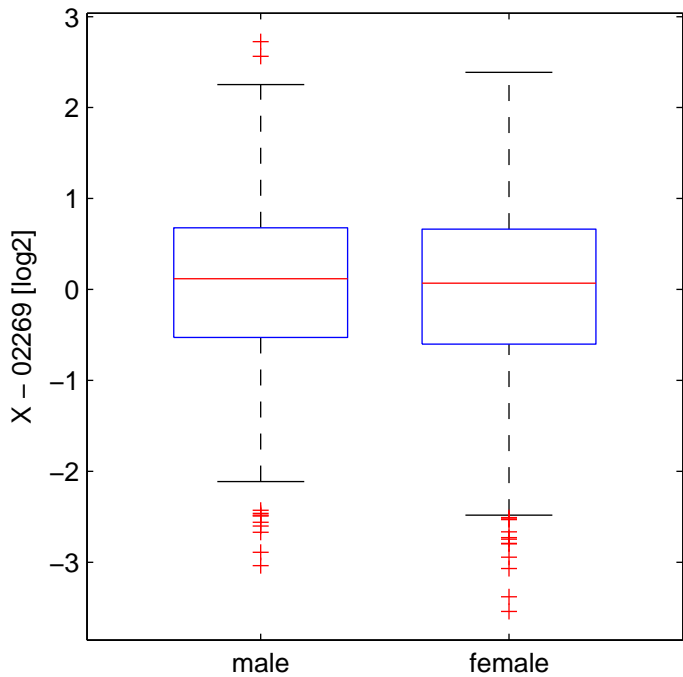

p-val: 5.99e-002

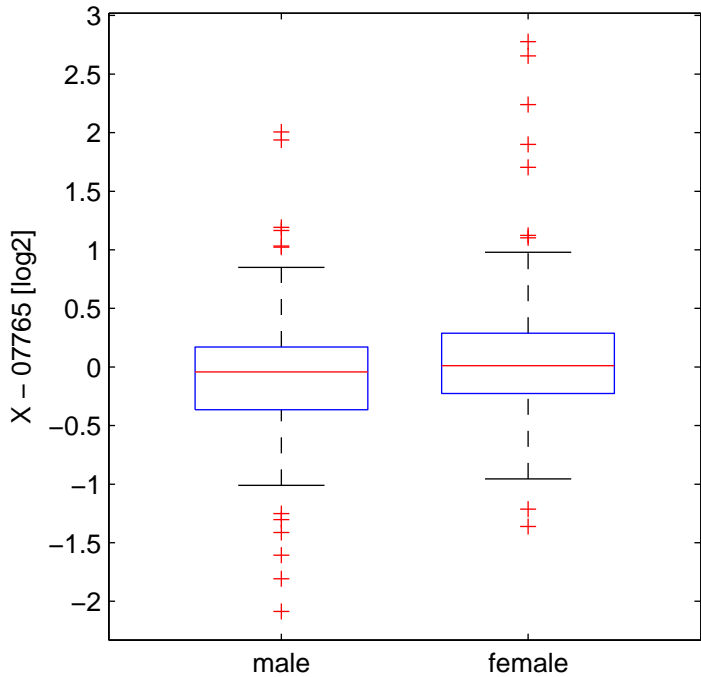

p-val: 3.70e-001

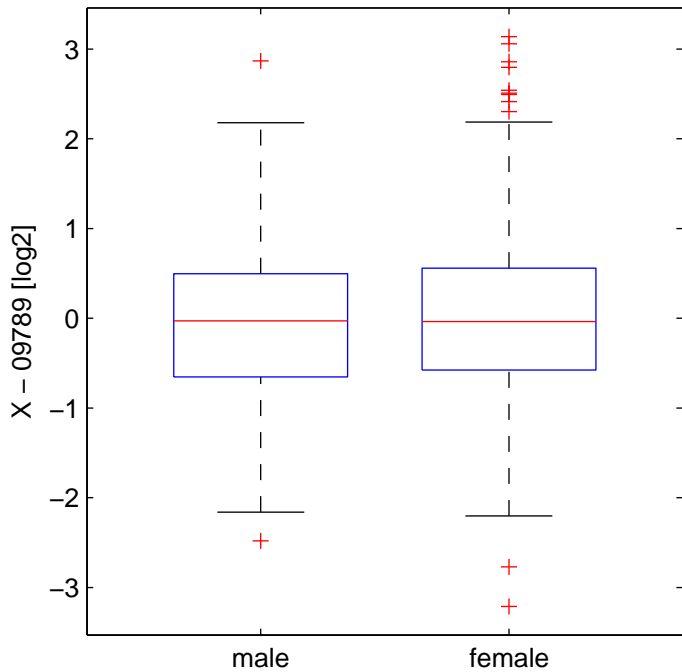

p-val: 1.26e-001

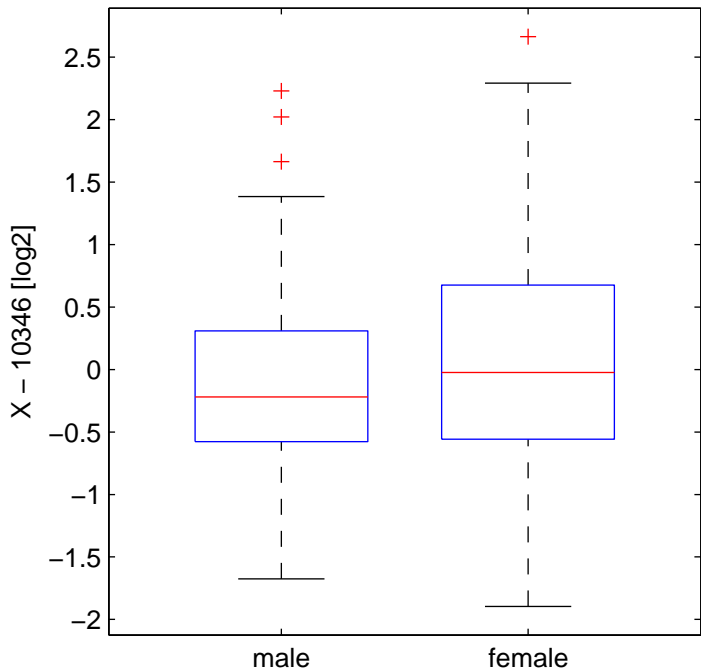

p-val: 5.18e-001

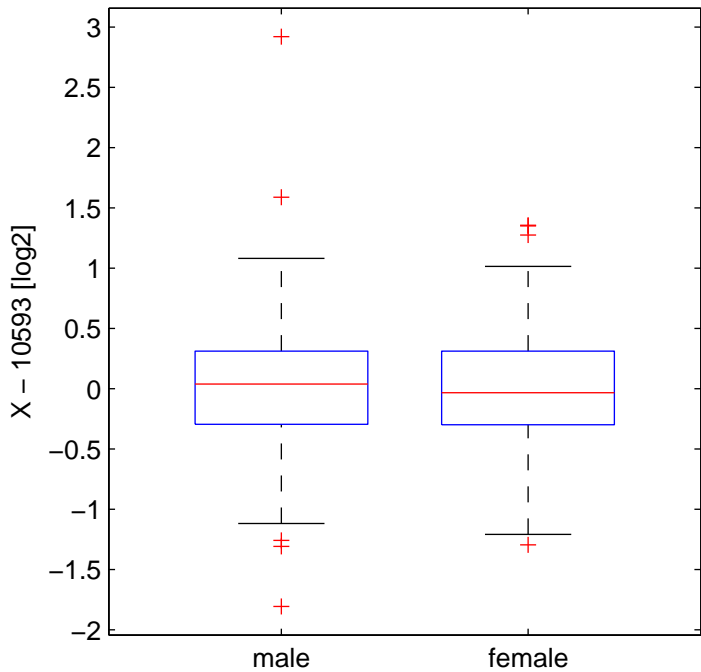

p-val: 1.41e-001

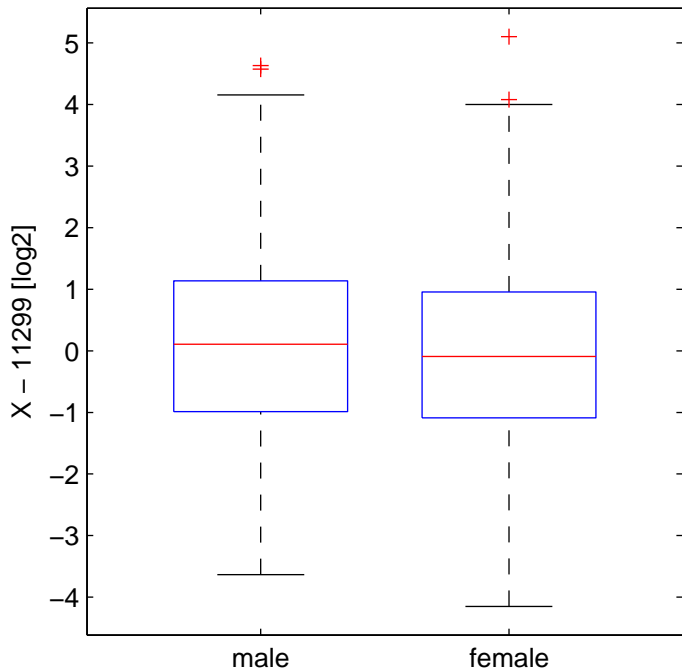

p-val: 5.49e-015

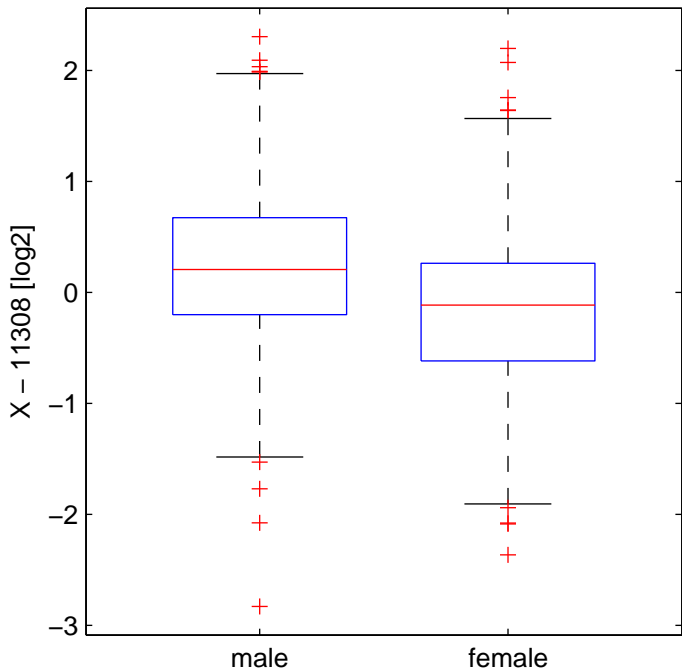



p-val: 1.48e-002

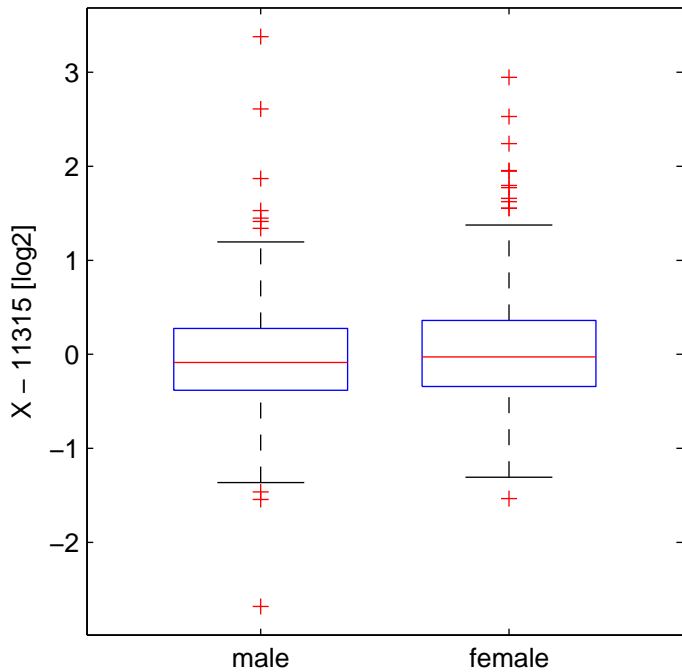

p-val: 7.02e-003

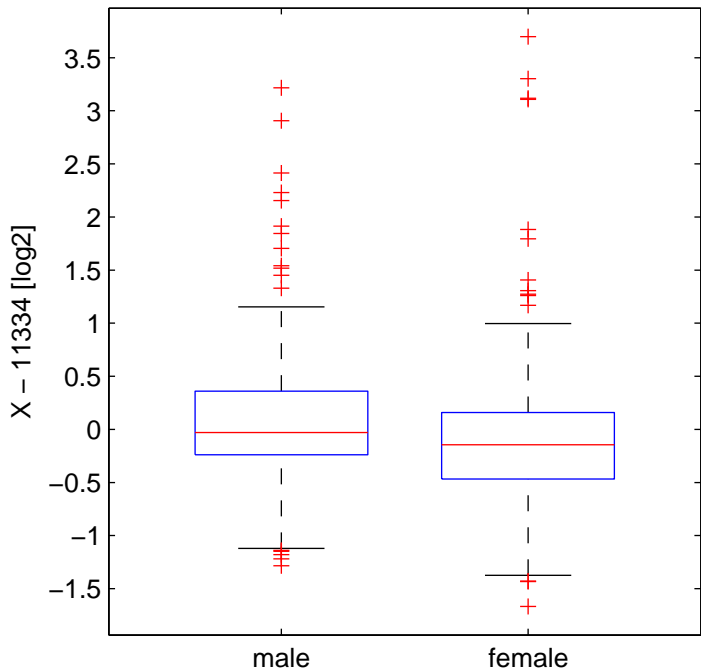

p-val: 2.03e-008

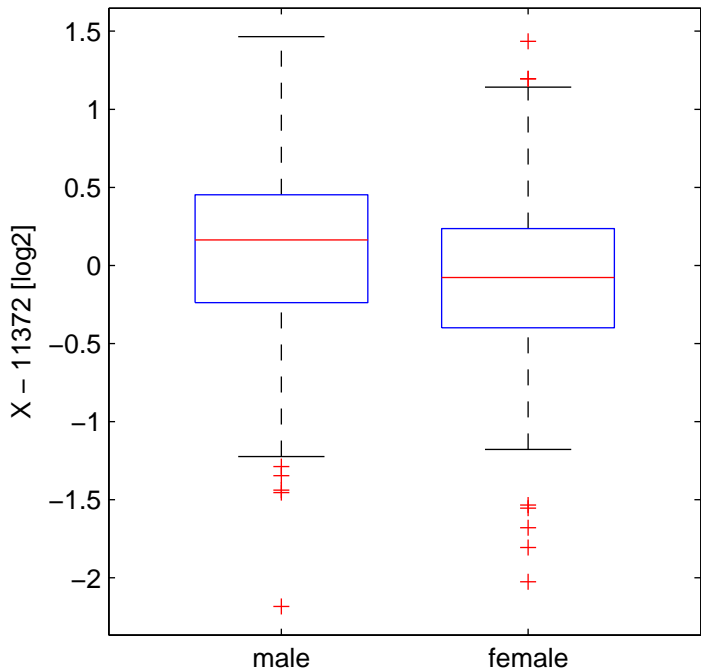

p-val: 3.61e-016

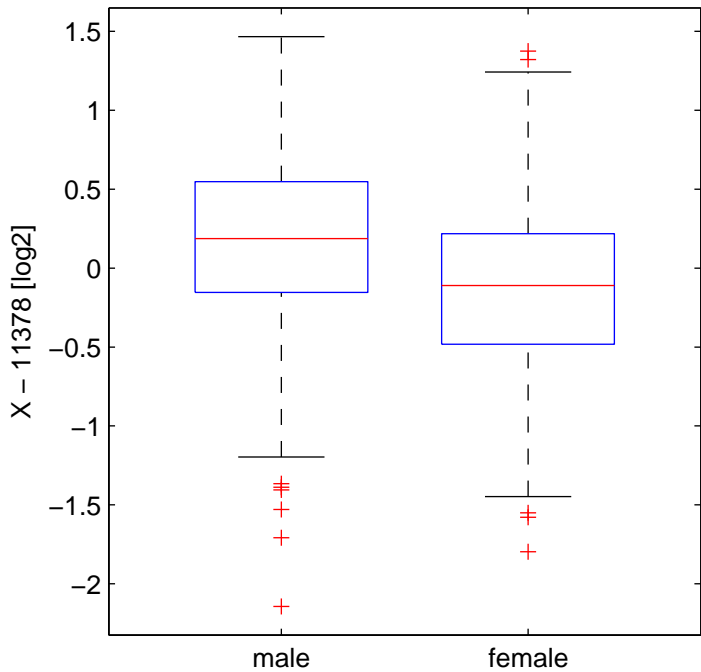

p-val: 3.32e-009

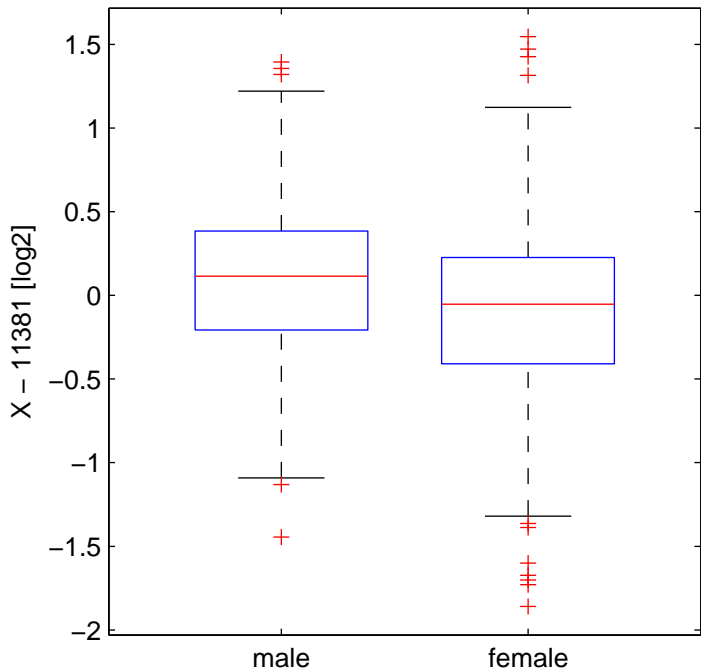

p-val: 5.33e-001

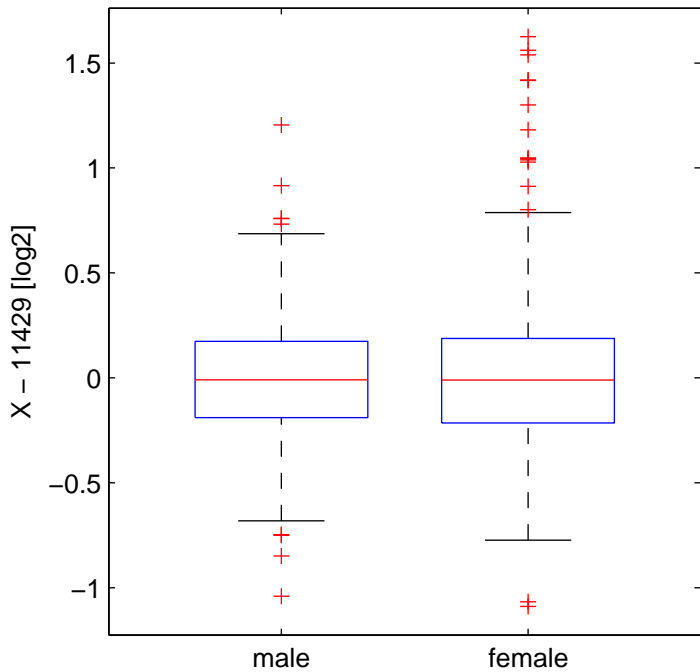

p-val: 7.63e-009

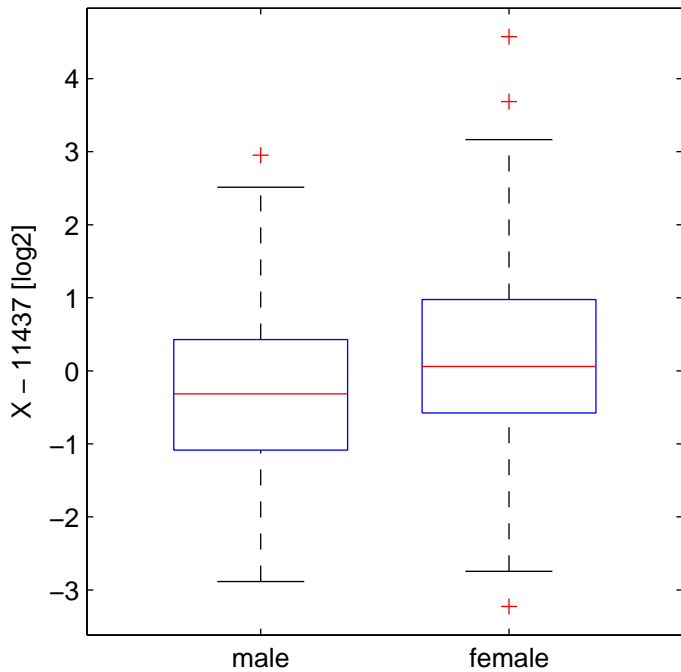

p-val: 2.76e-001

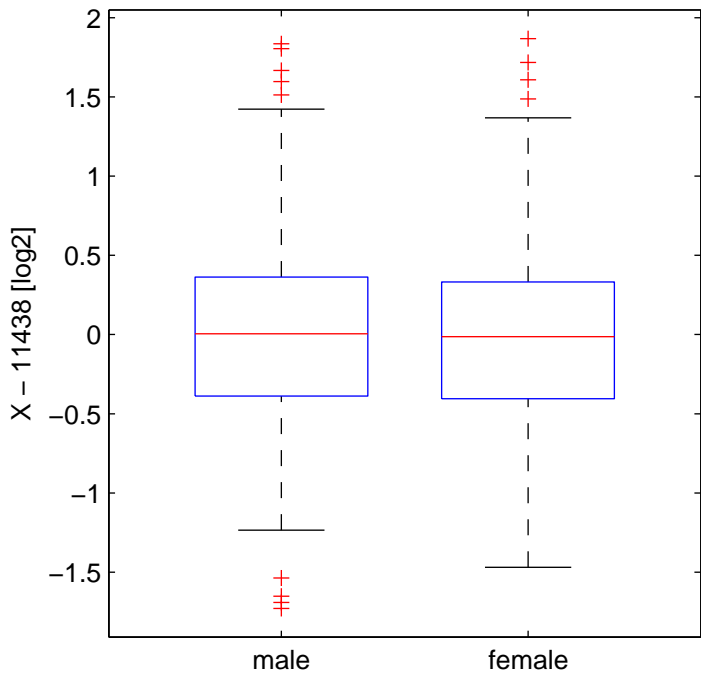



p-val: 1.21e-044

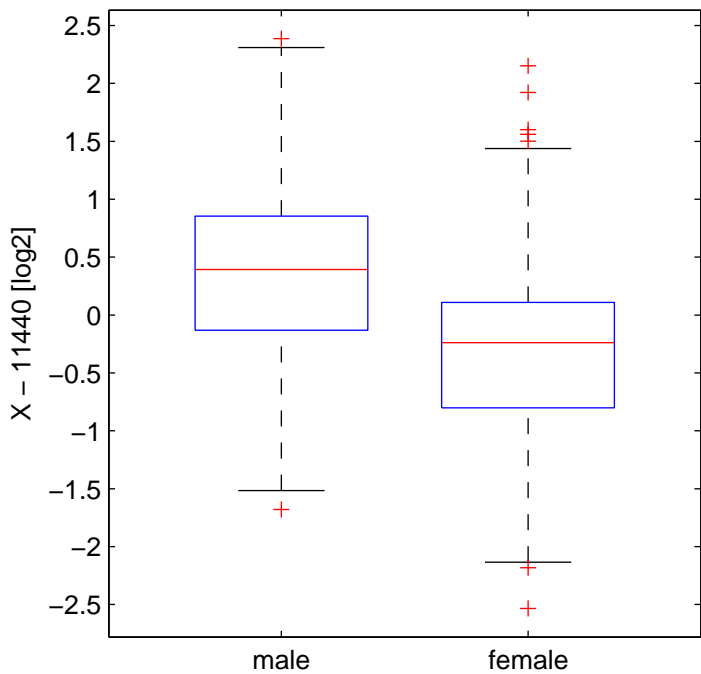

p-val: 1.20e-017

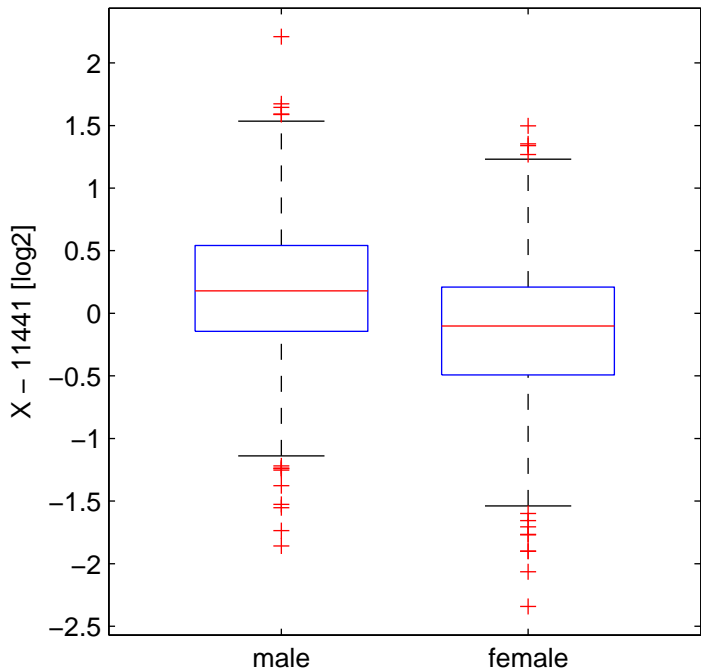

p-val: 3.18e-017

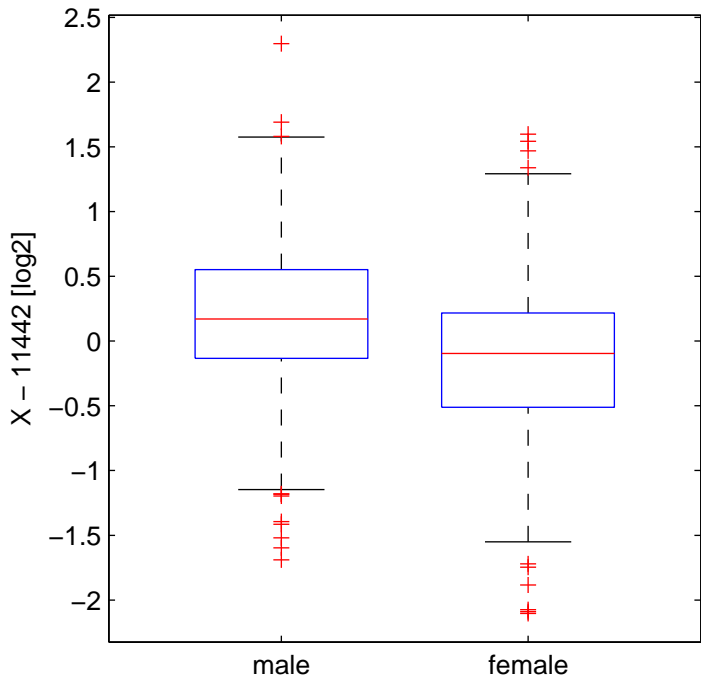

p-val: 4.20e-037

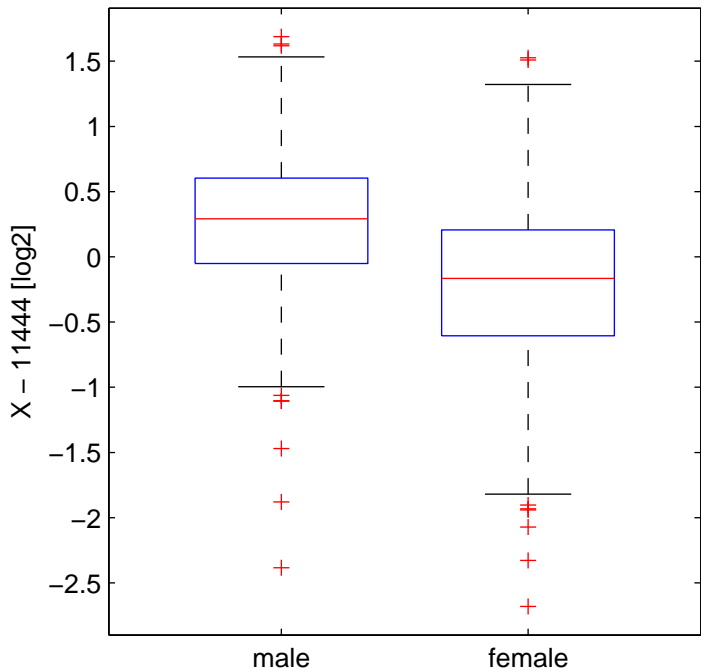

p-val: 3.26e-003

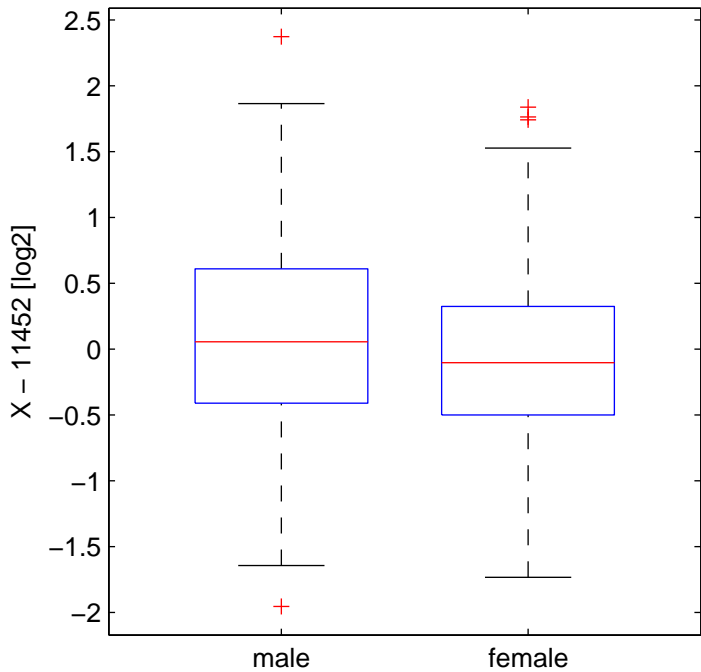

p-val: 2.28e-001

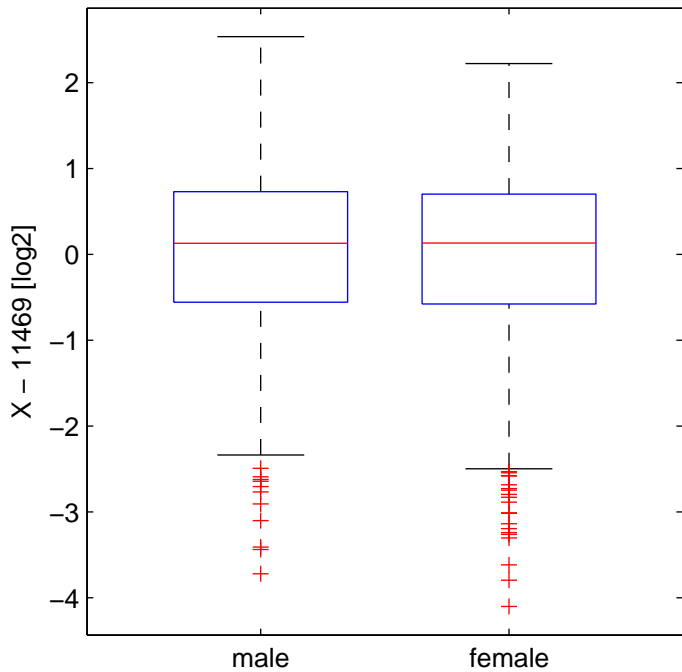

p-val:  $1.55e-025$

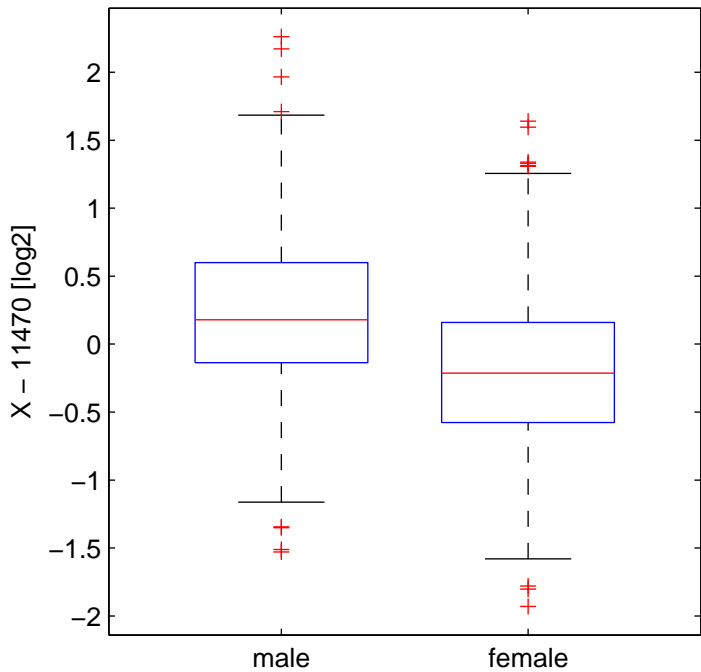

p-val: 1.63e-001

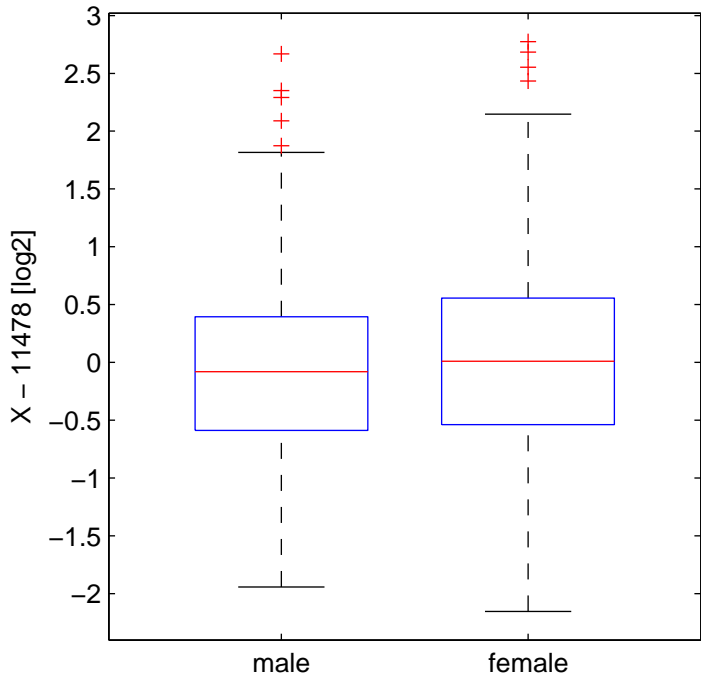



p-val: 2.87e-002

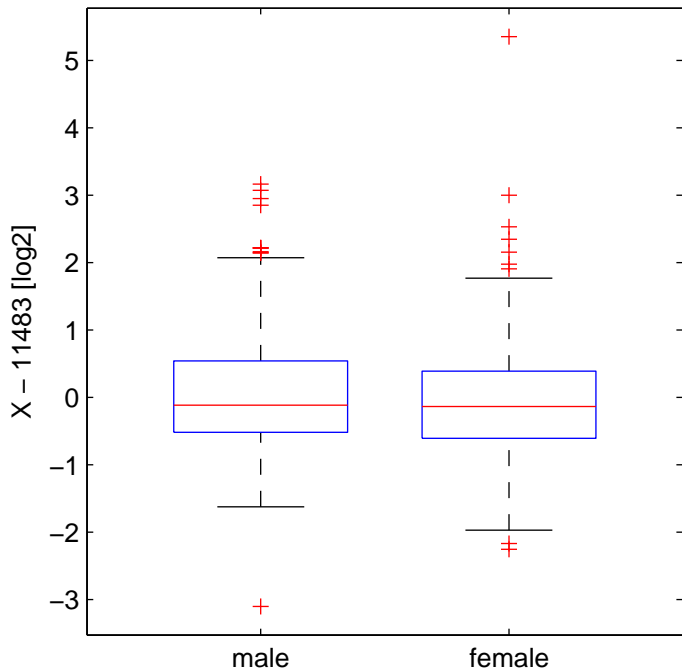

p-val: 5.63e-006

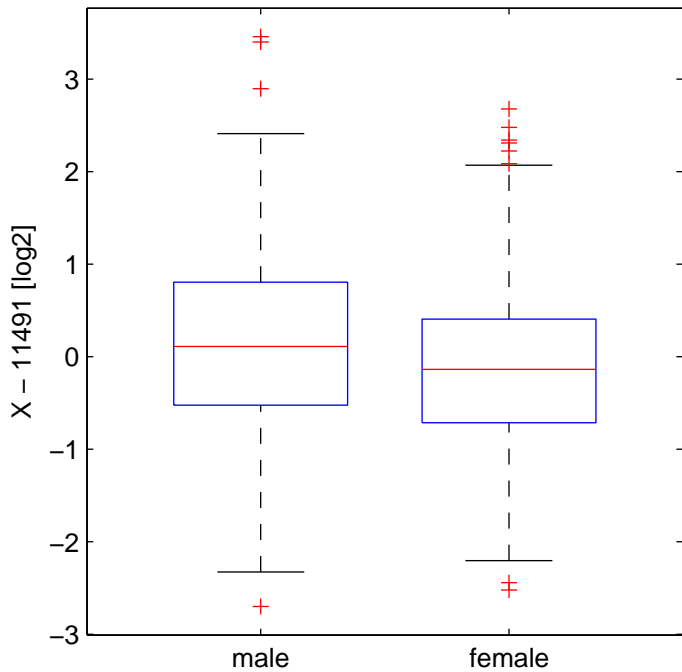

p-val: 3.52e-003

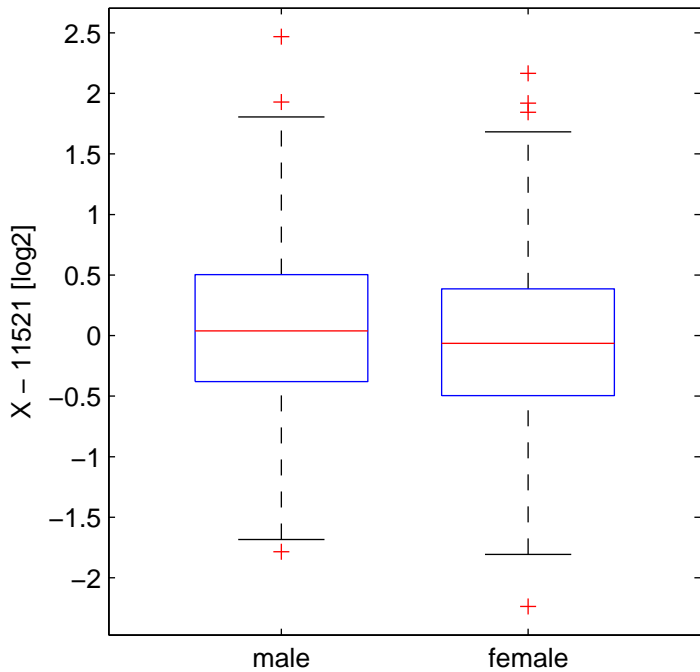

p-val: 7.20e-011

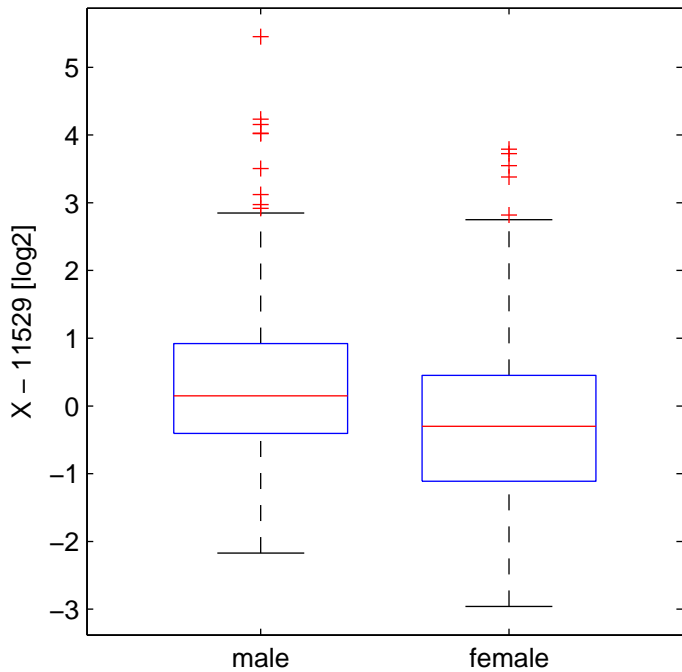

p-val: 7.17e-005

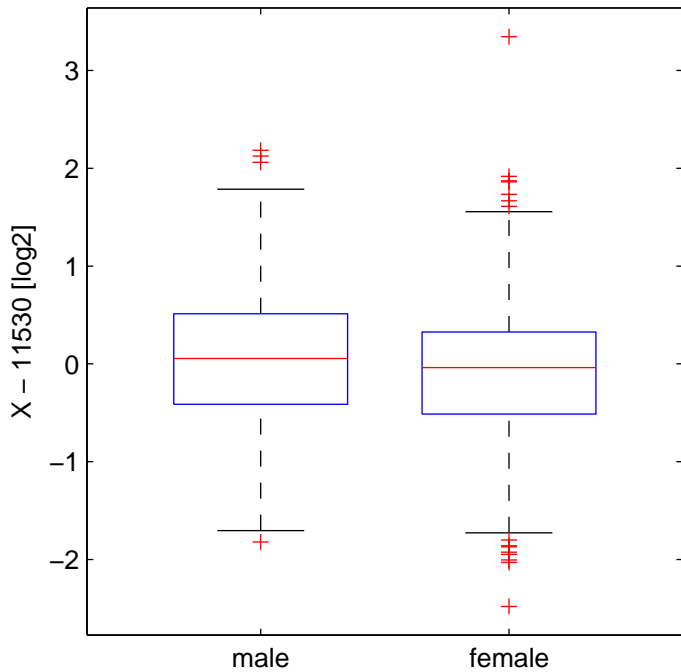

p-val: 6.83e-001

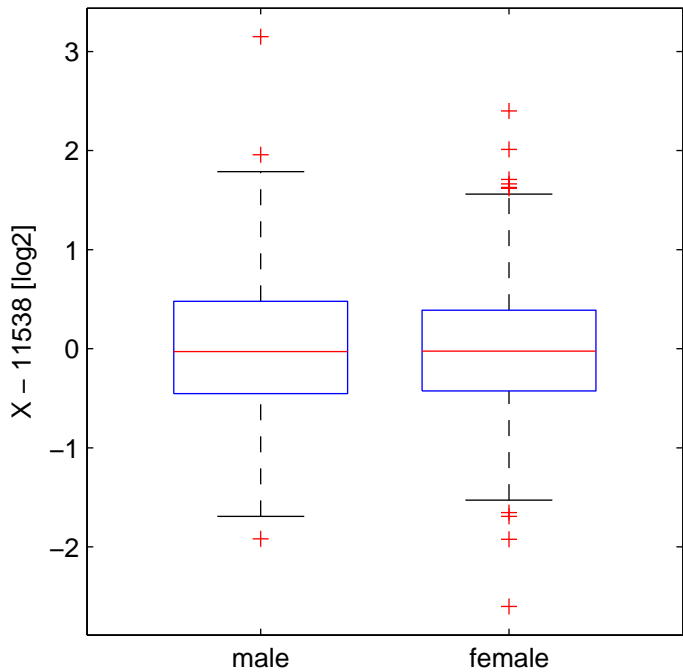

p-val: 2.86e-001

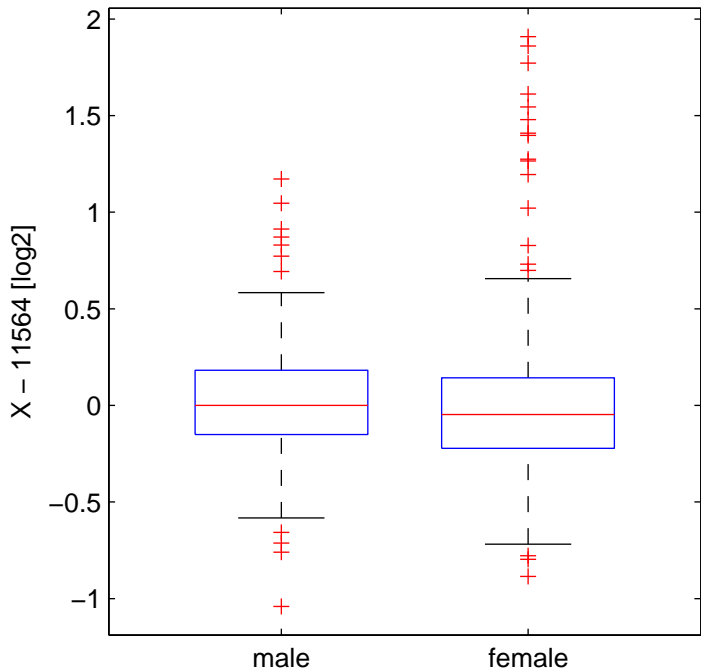

p-val: 7.18e-003

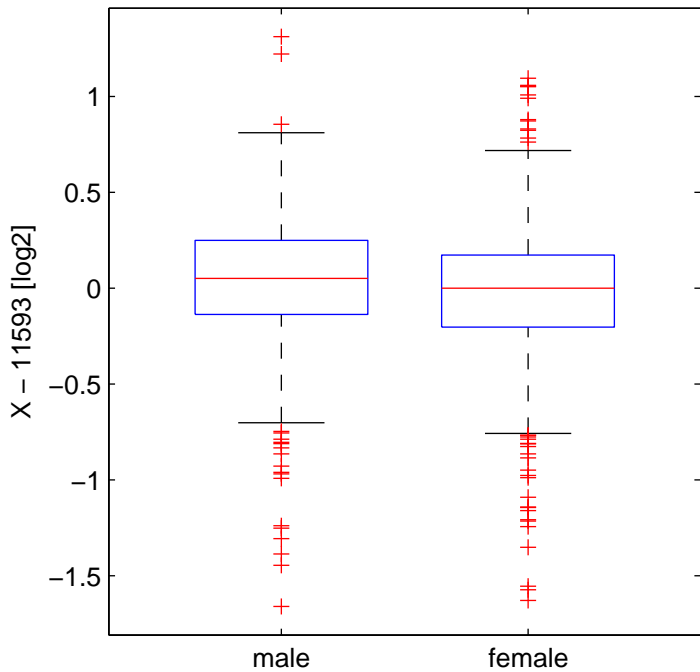



p-val: 1.73e-004

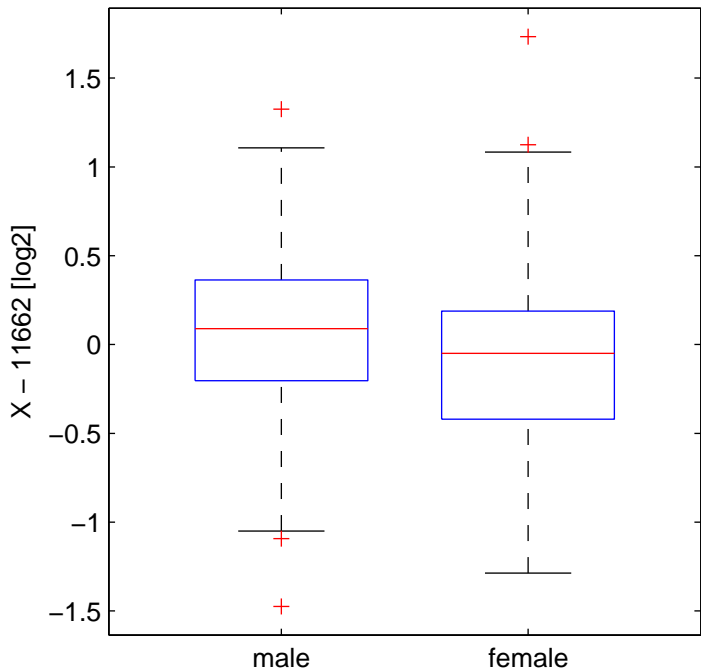

p-val: 1.55e-012

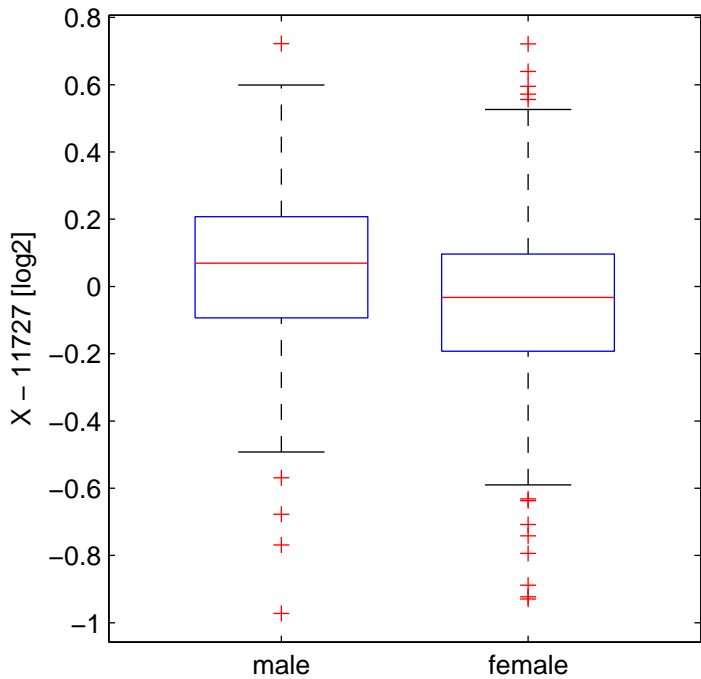

p-val: 1.25e-003

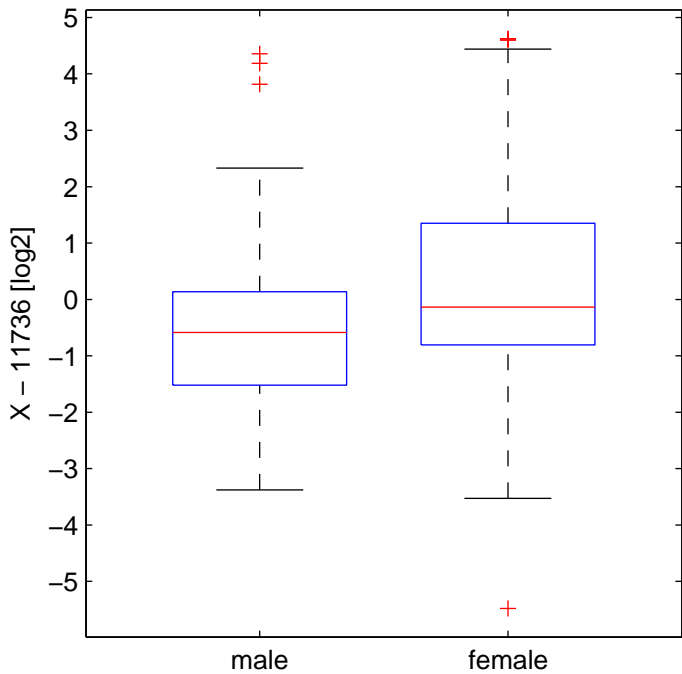

p-val: 4.19e-015

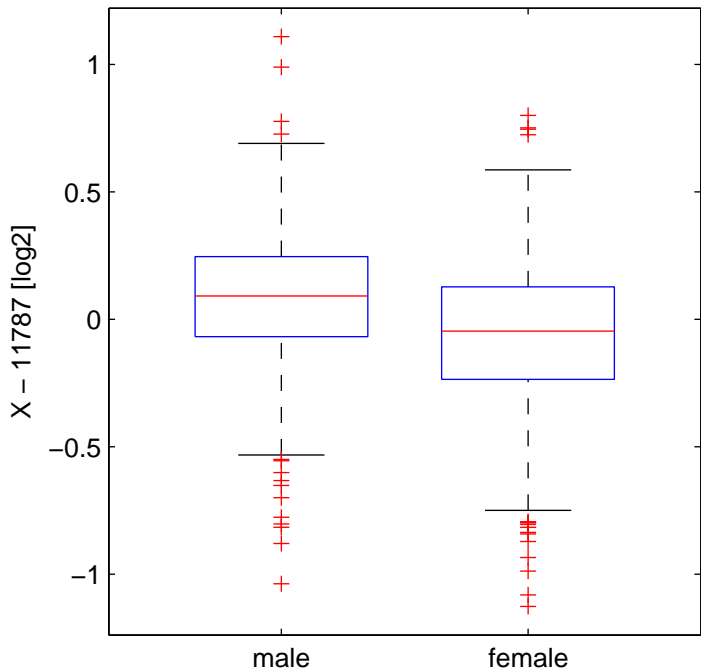

p-val: 3.50e-006

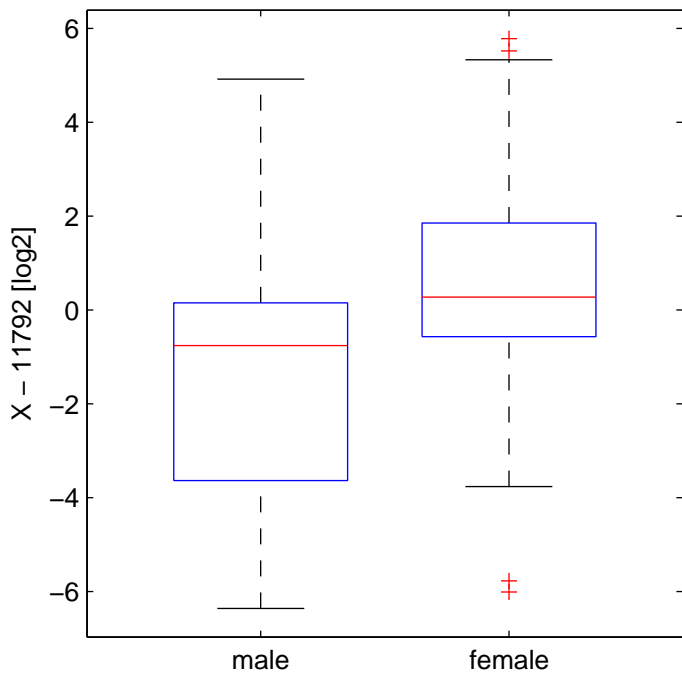

p-val: 1.65e-003

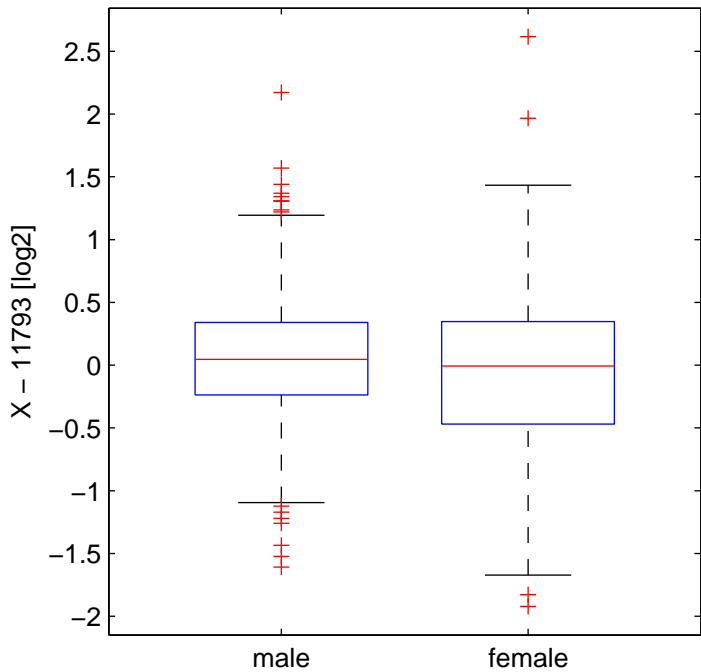

p-val: 1.24e-013

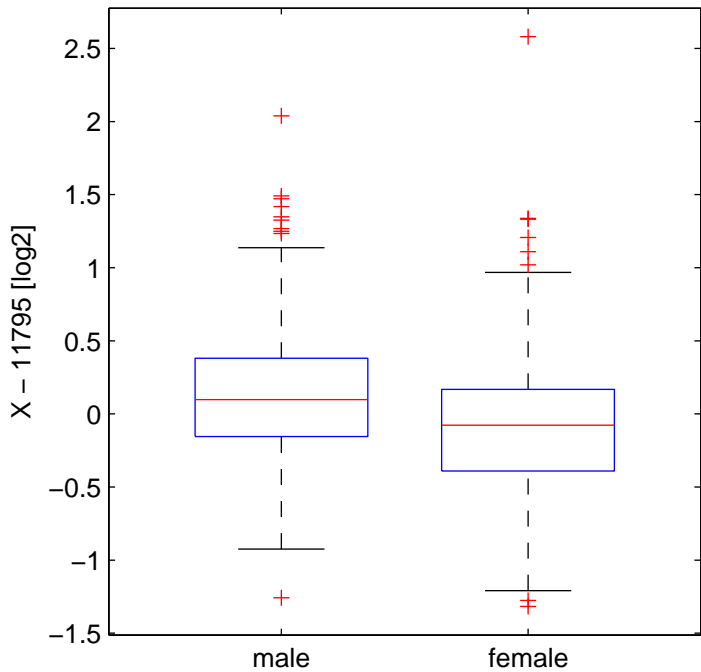

p-val: 2.57e-017

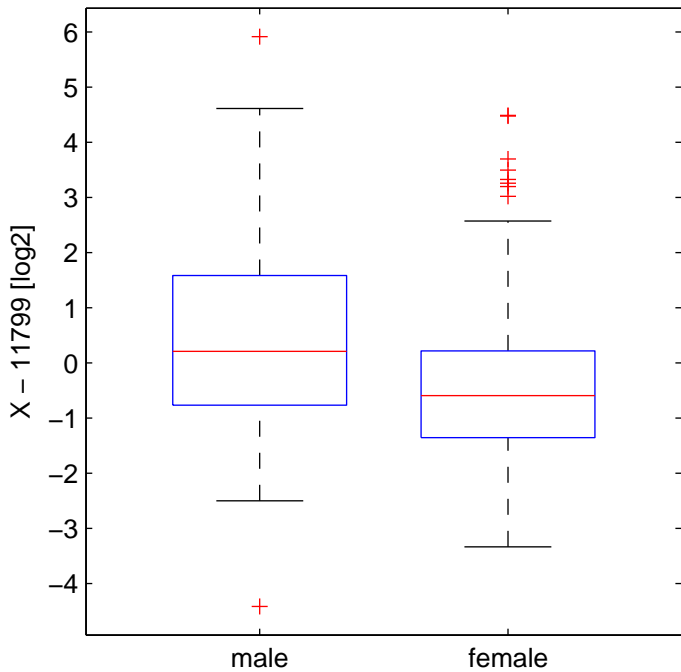



p-val: 3.86e-001

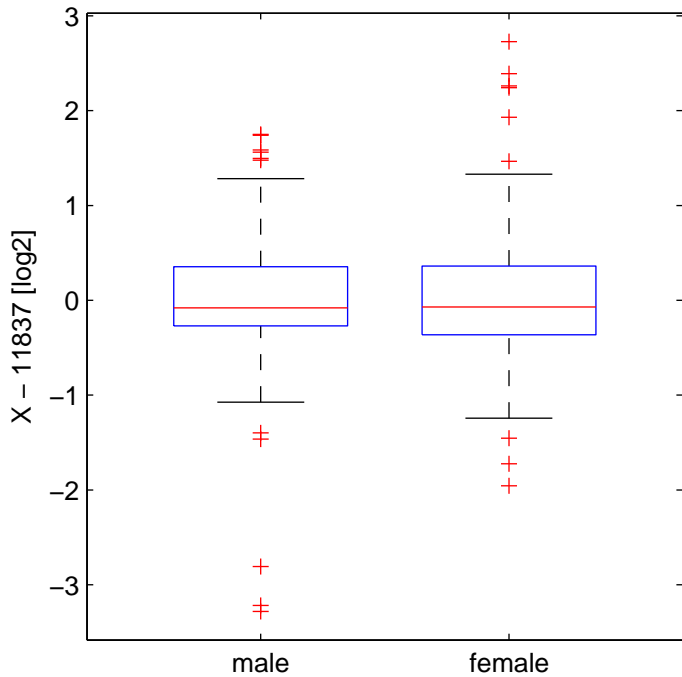

p-val: 2.17e-002

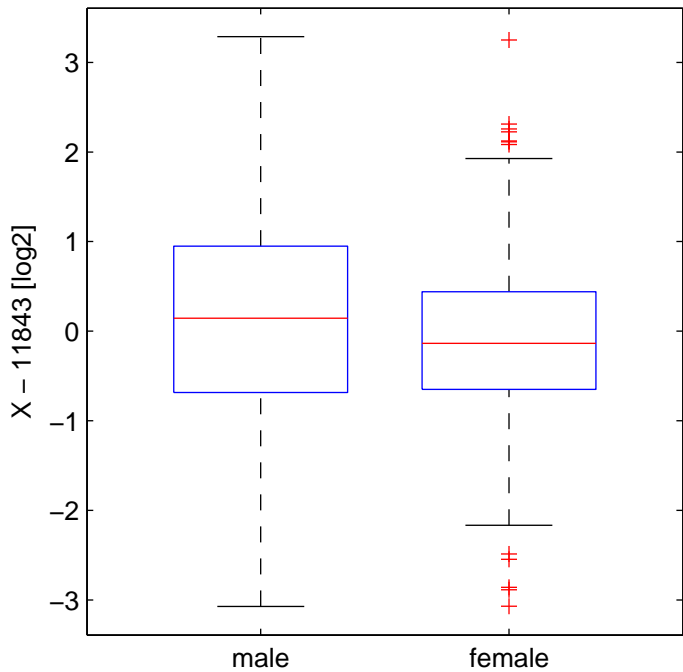

p-val: 9.41e-001

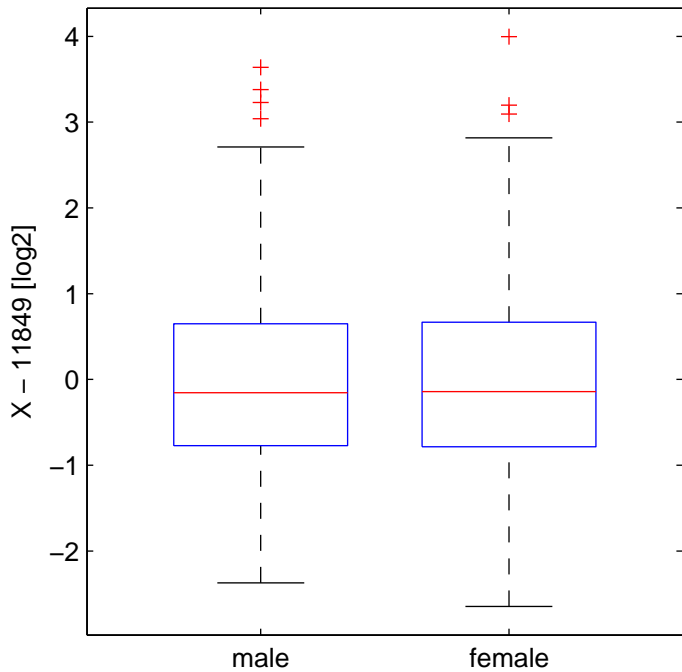

p-val: 4.95e-001

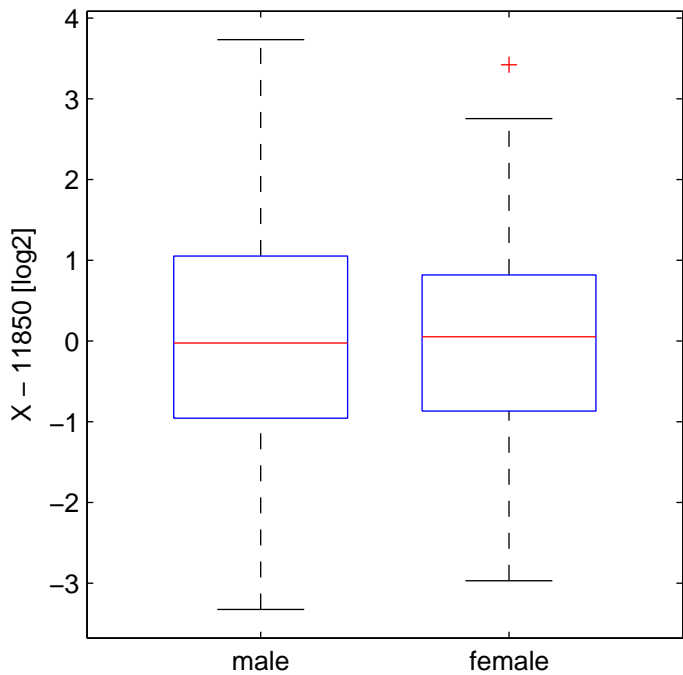

p-val: 3.49e-001

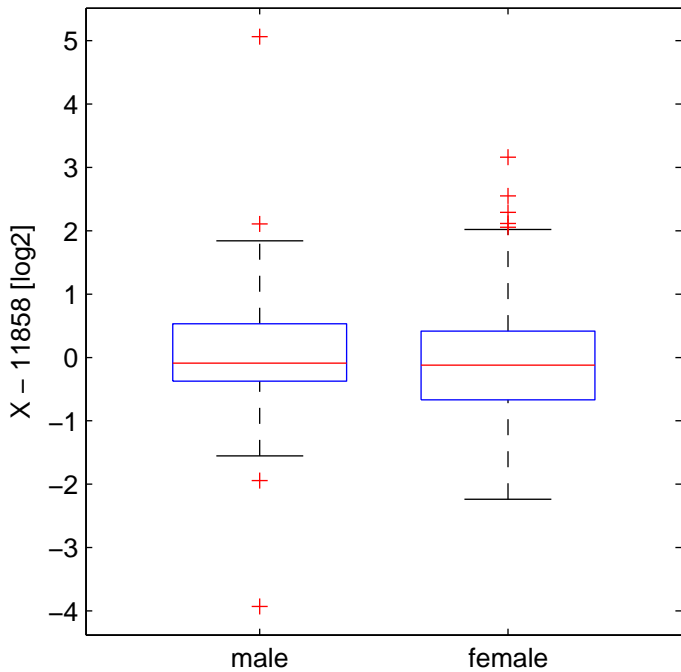

p-val: 4.88e-005

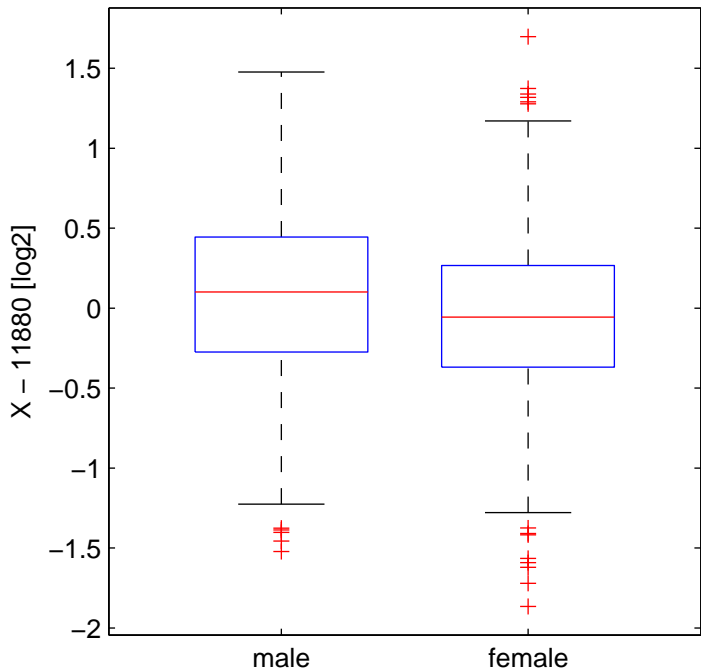

p-val: 9.27e-001

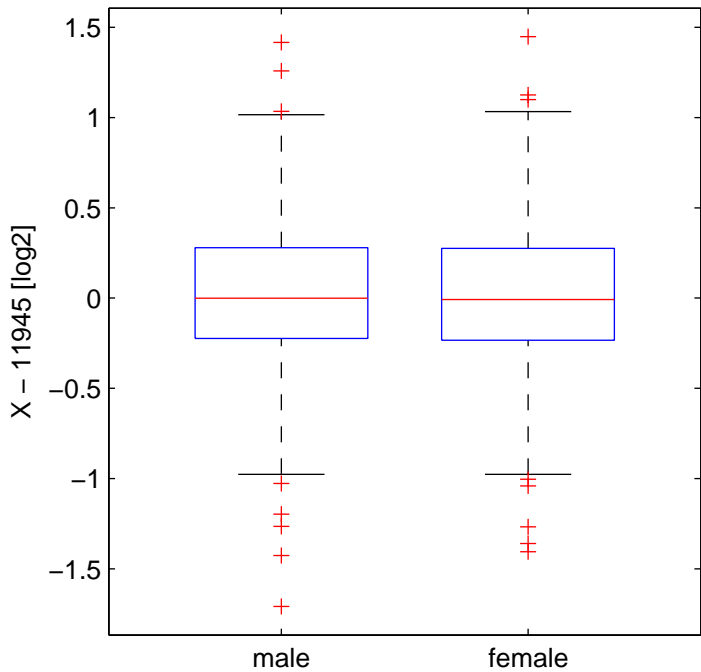

p-val: 9.51e-001

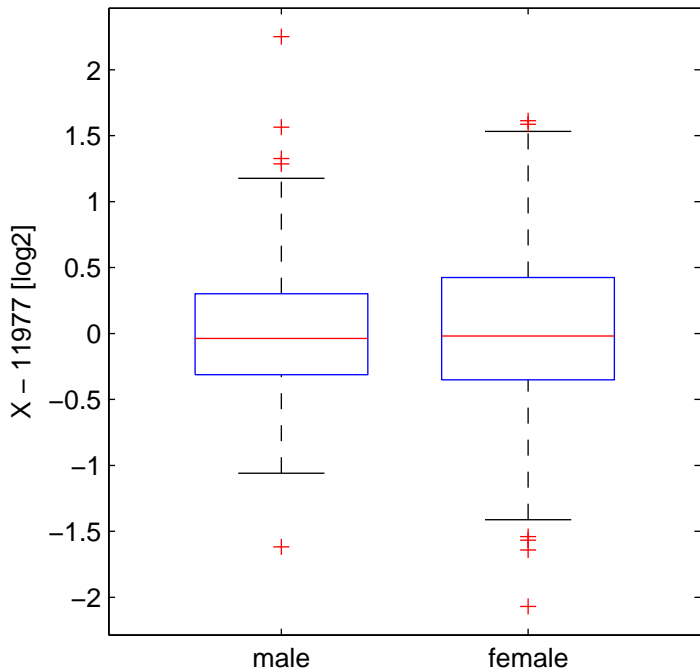



p-val: 4.28e-001

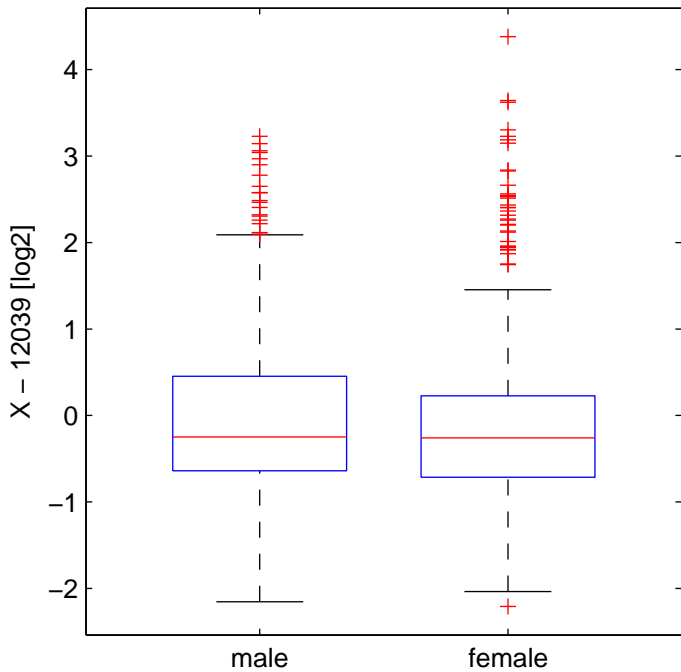

p-val: 9.79e-007

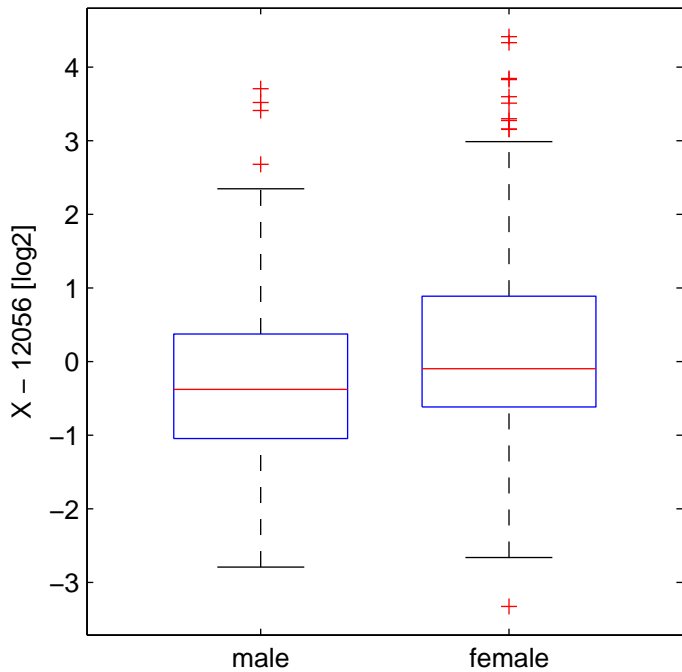

p-val: 5.68e-002

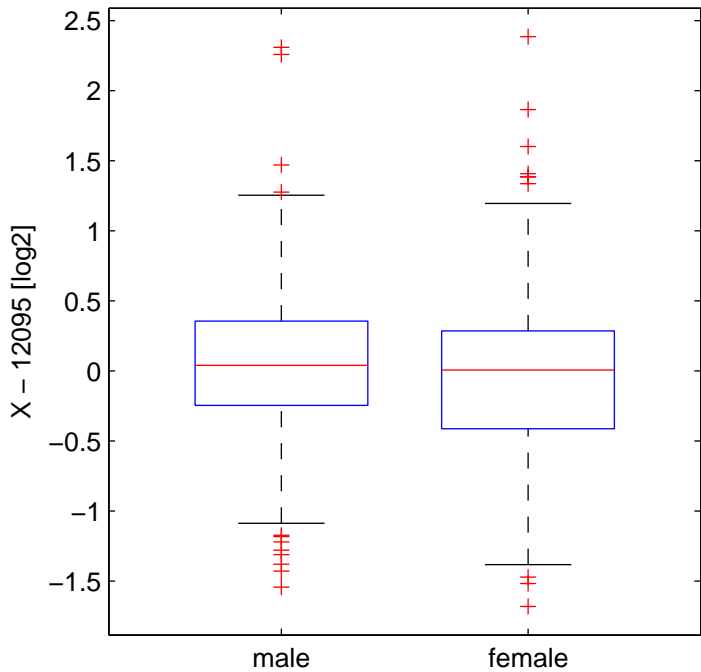

p-val: 1.12e-001

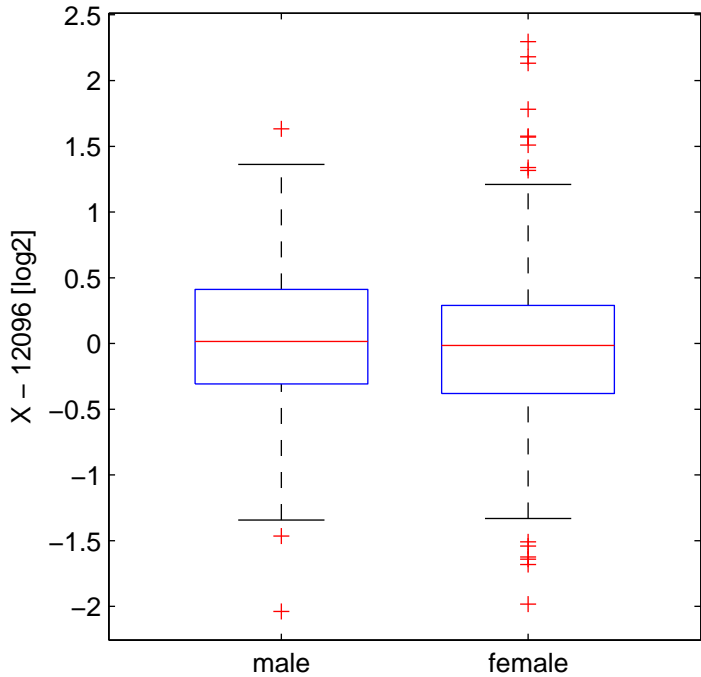

p-val: 7.01e-005

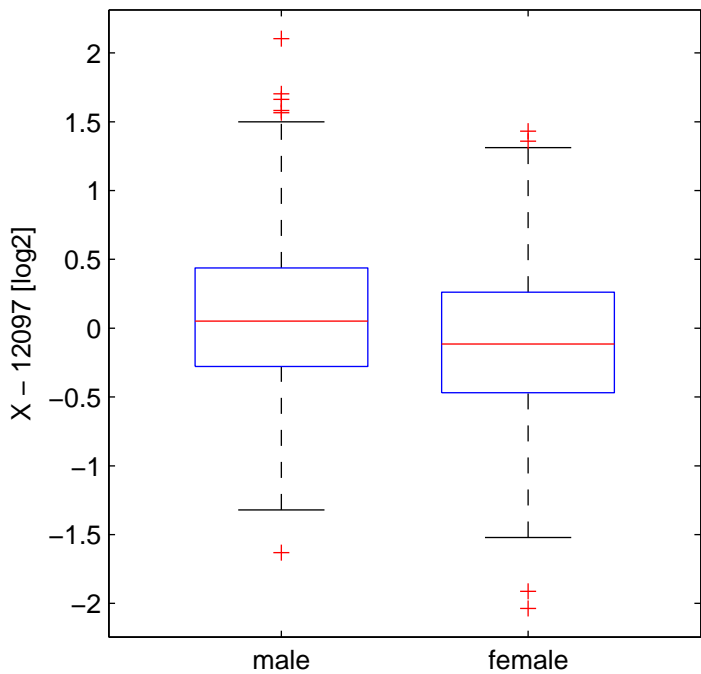

p-val: 6.82e-001

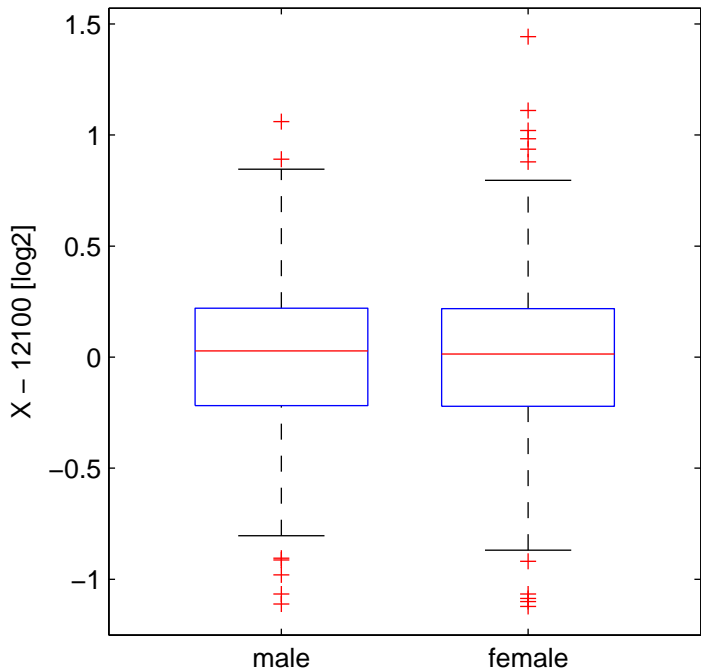

p-val: 4.32e-001

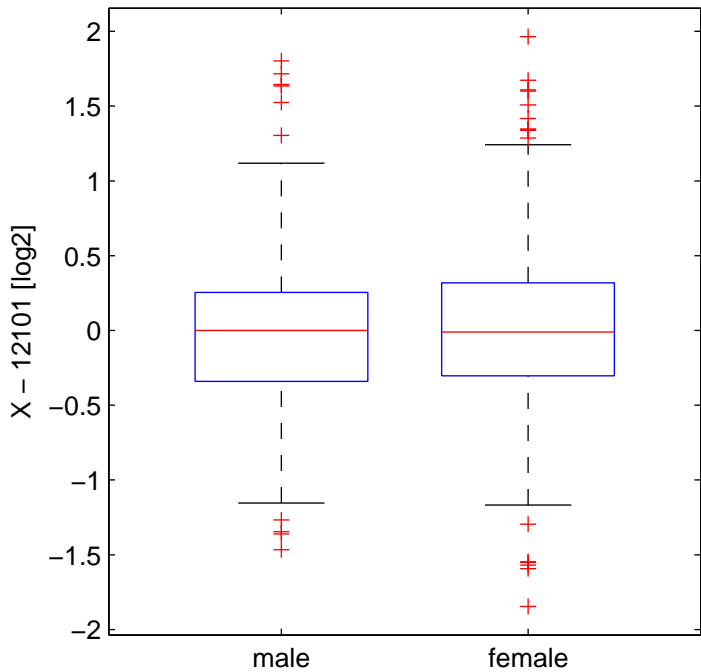

p-val: 1.55e-001

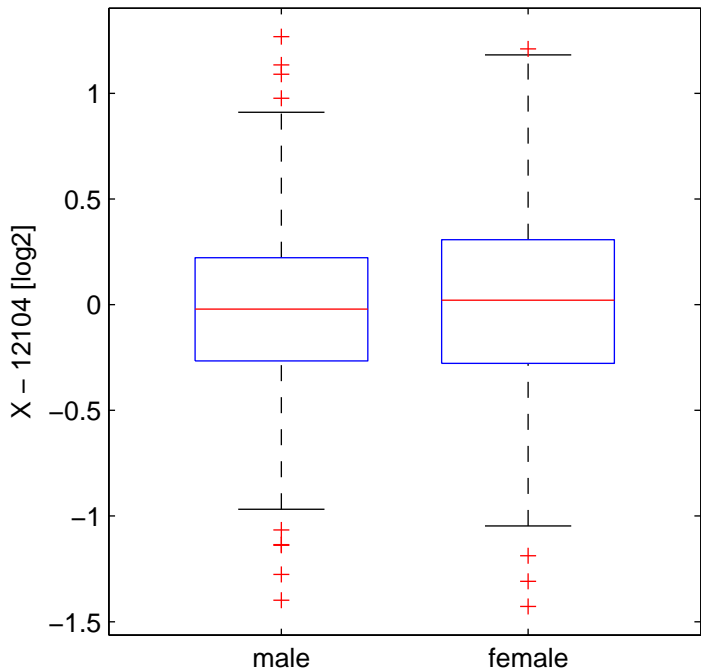



p-val: 9.25e-003

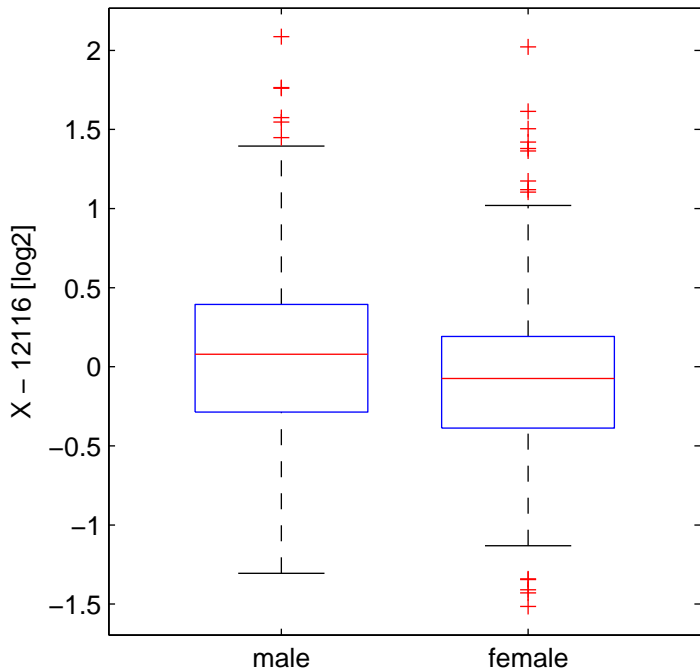

p-val: 9.62e-001

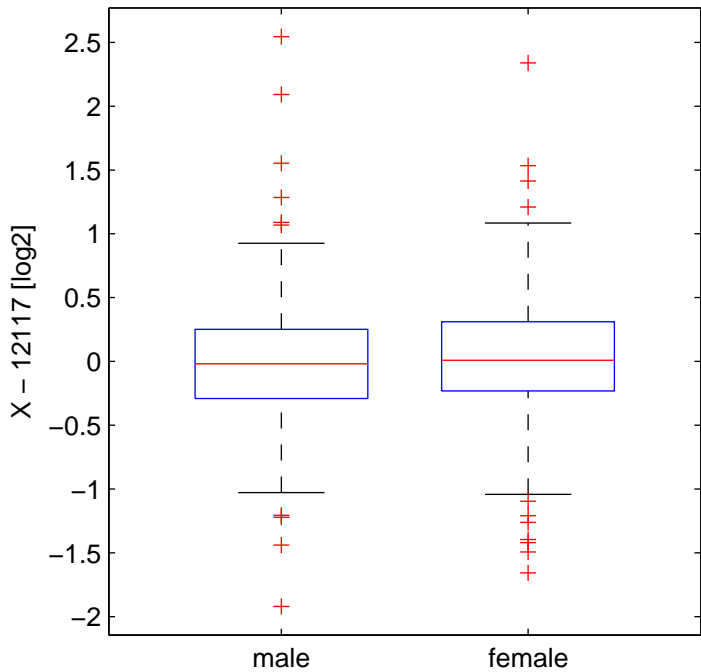

p-val: 1.60e-001

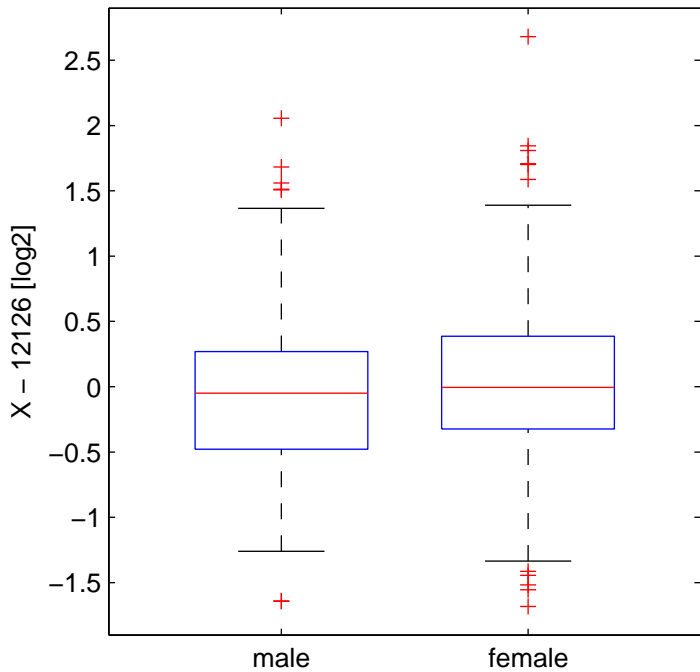

p-val: 3.99e-001

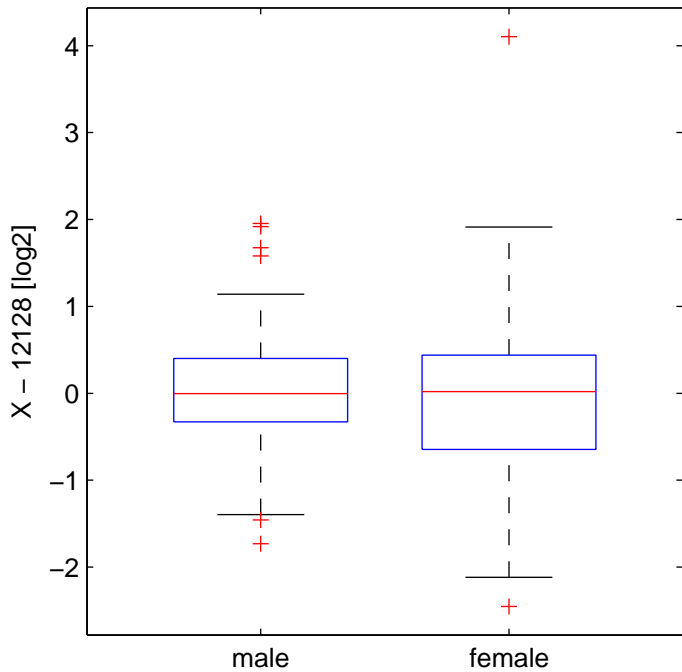

p-val: 3.30e-001

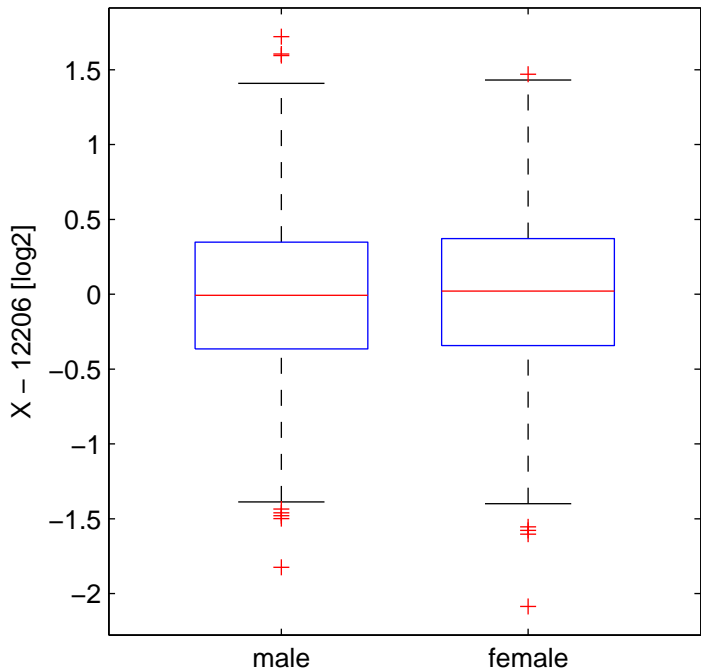

p-val: 4.29e-002

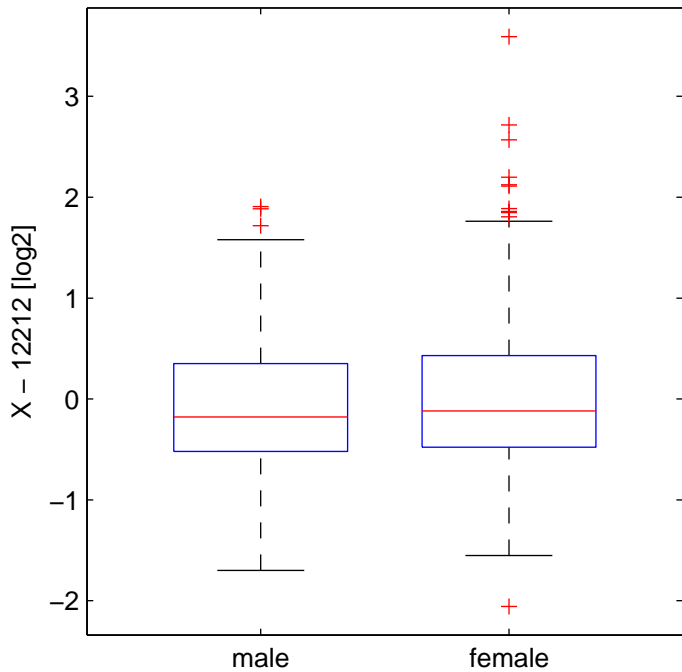

p-val: 7.92e-001

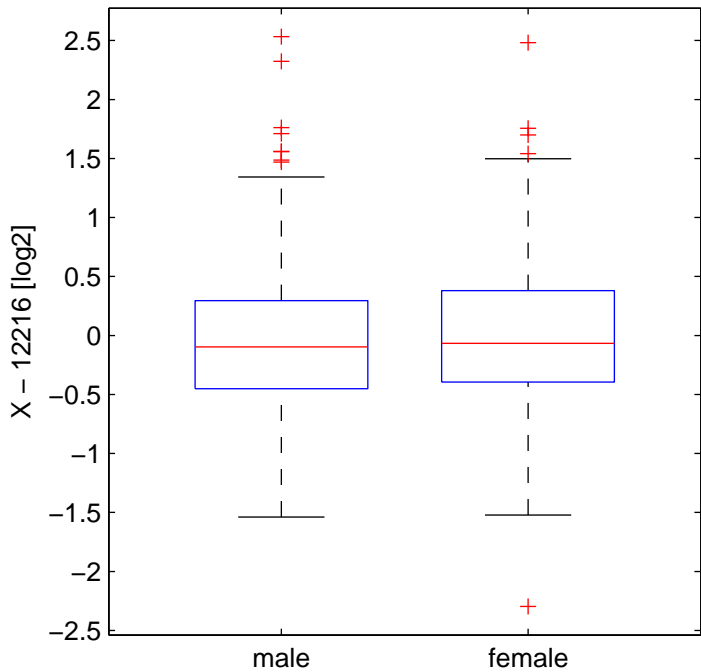

p-val: 6.88e-001

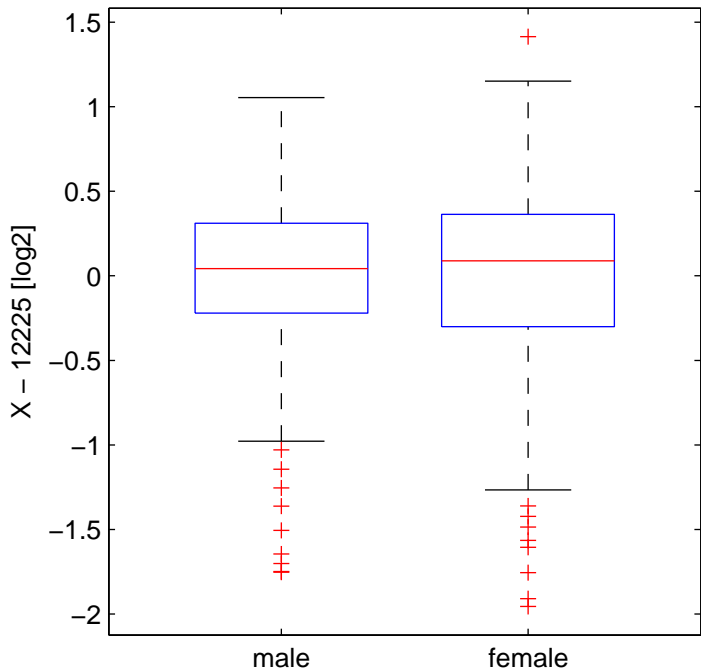



p-val: 4.93e-005

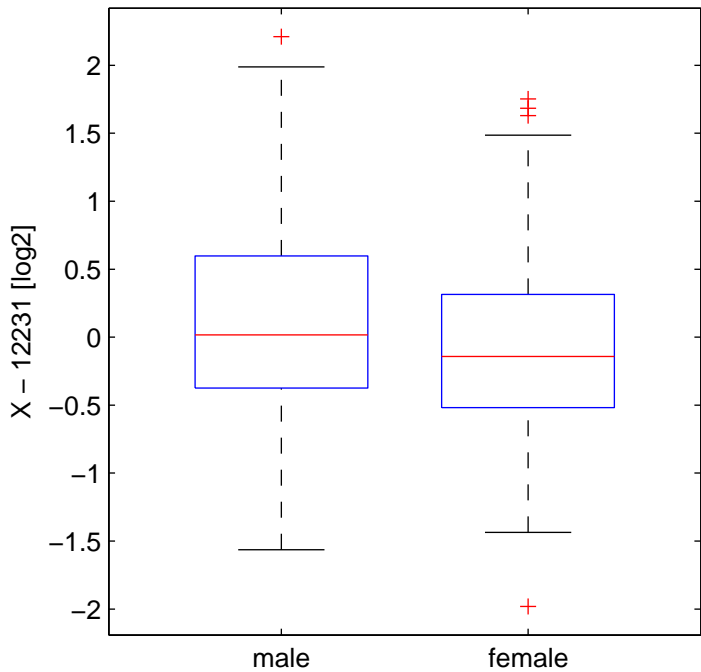

p-val: 5.69e-001

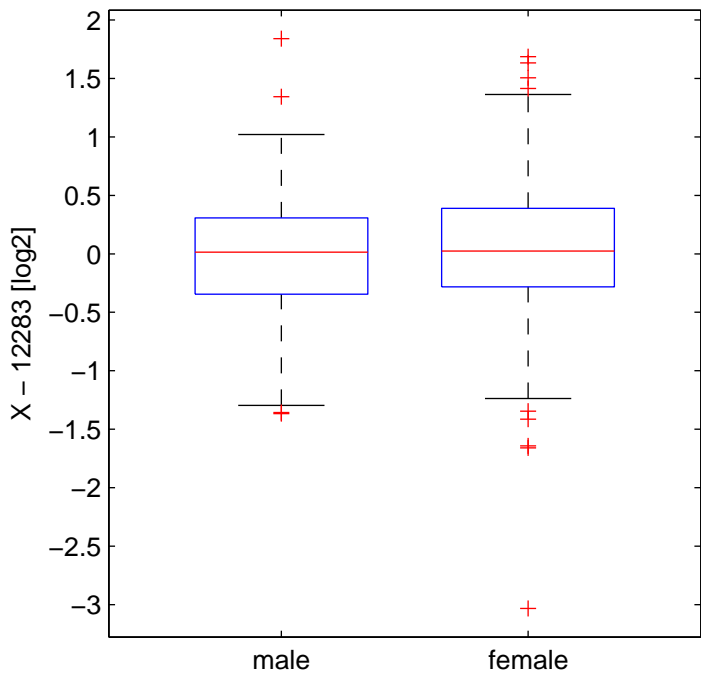

p-val: 9.61e-002

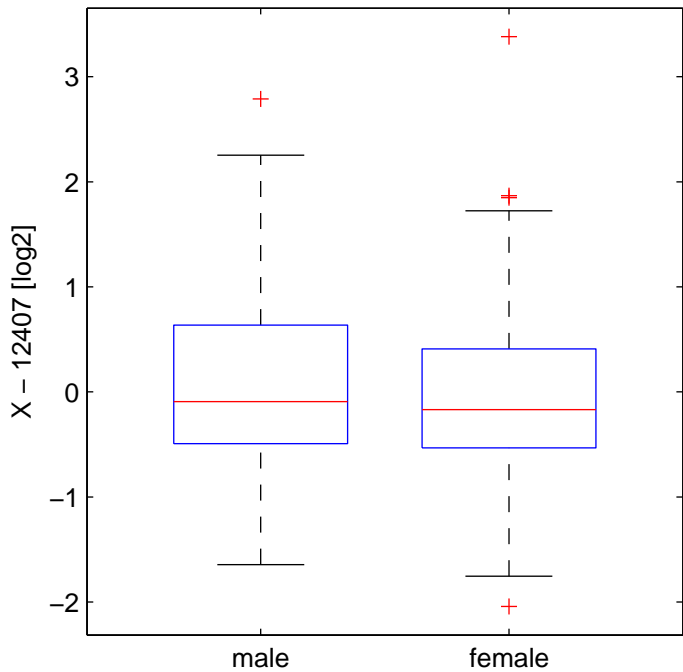

p-val: 4.34e-001

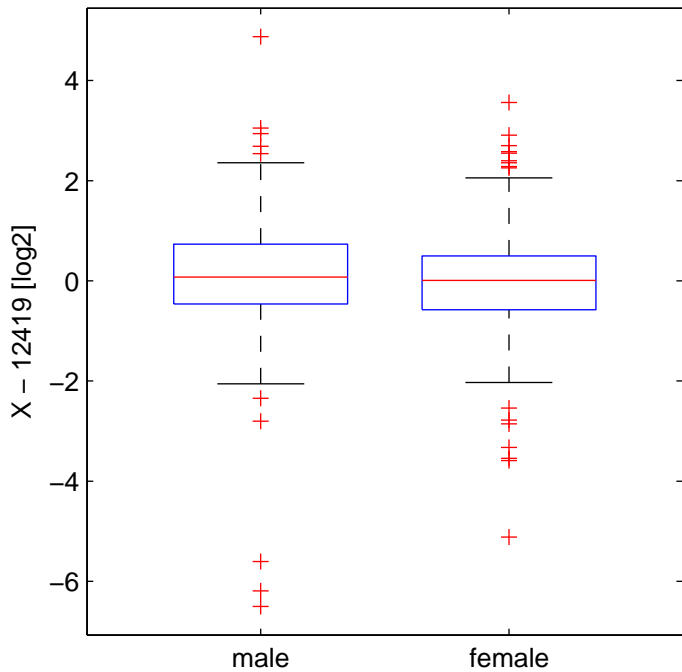

p-val: 7.06e-001

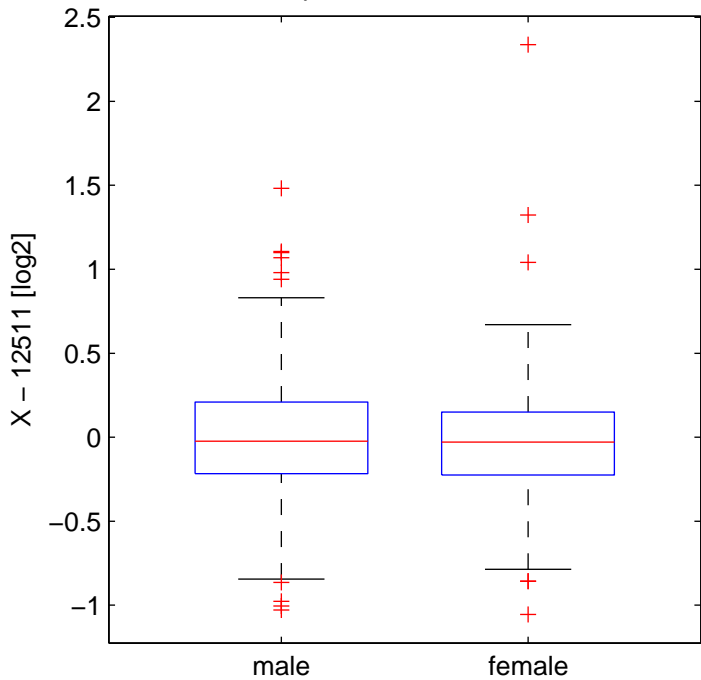

p-val: 4.52e-001

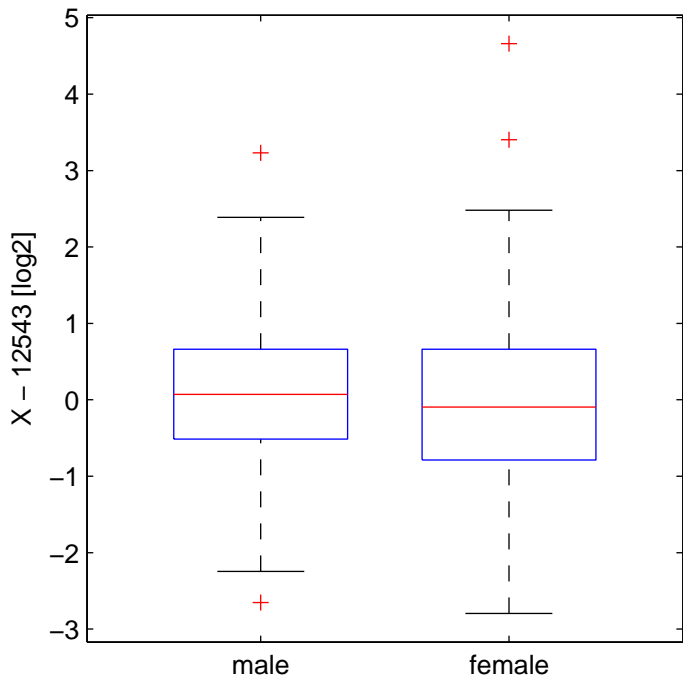

p-val: 3.95e-013

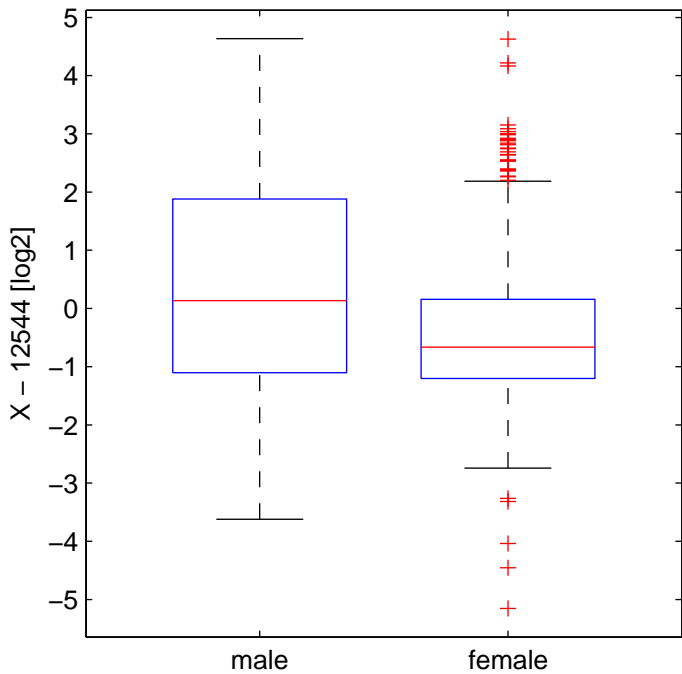

p-val: 8.39e-001

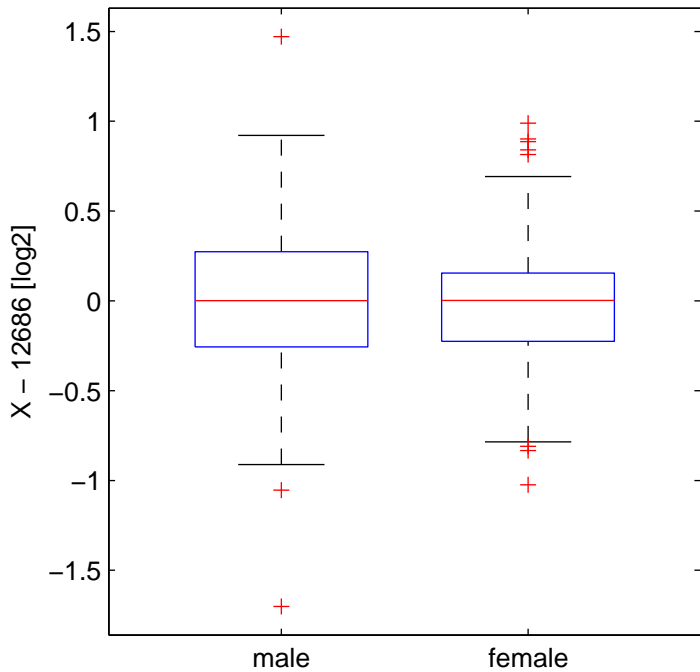



p-val: 5.97e-001

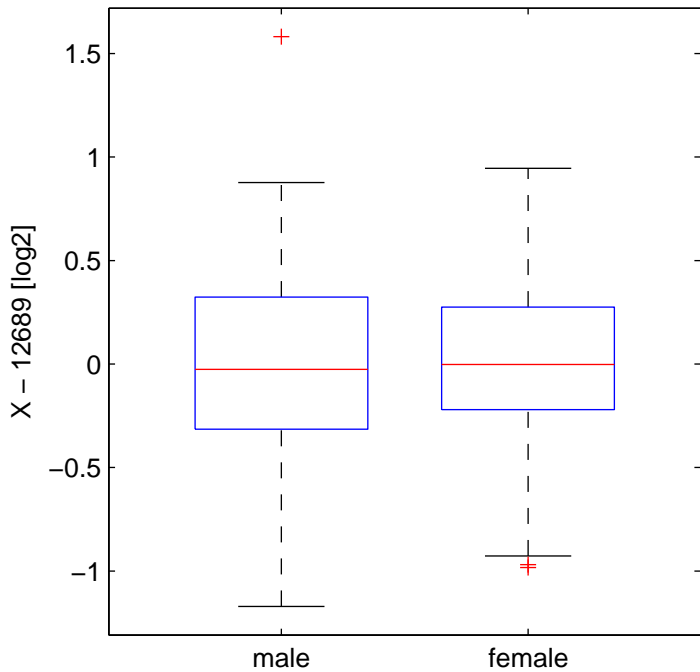

p-val: 3.40e-001

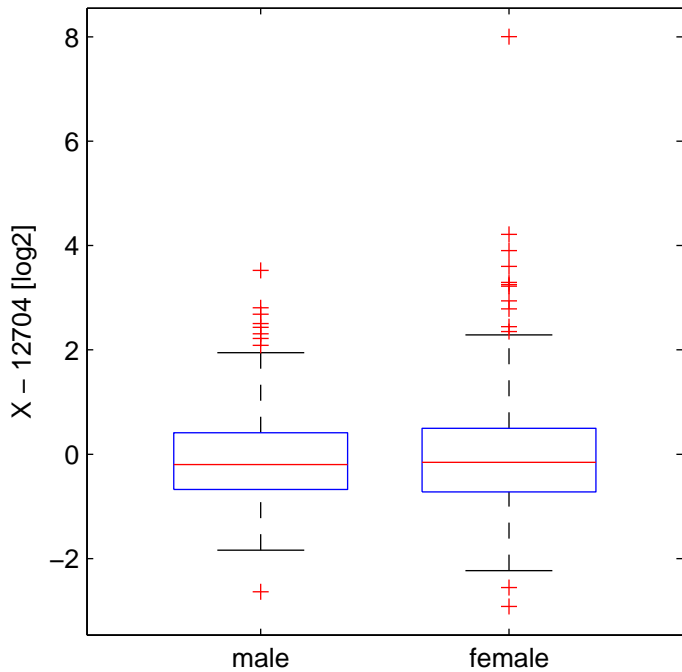

p-val: 3.81e-002

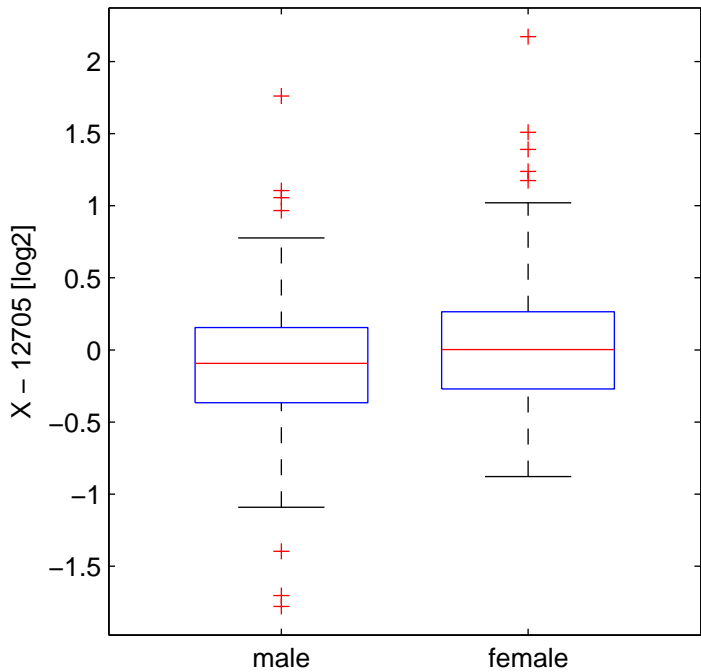

p-val: 2.99e-001

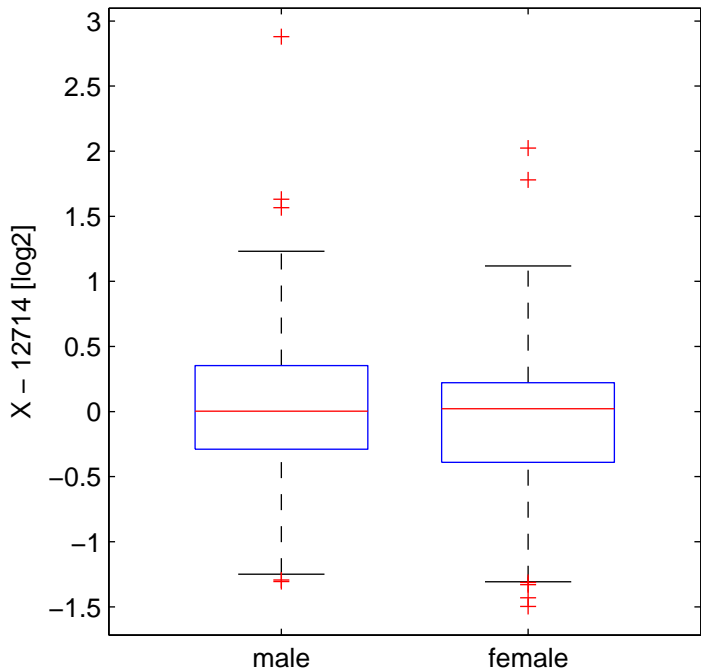

p-val: 1.75e-001

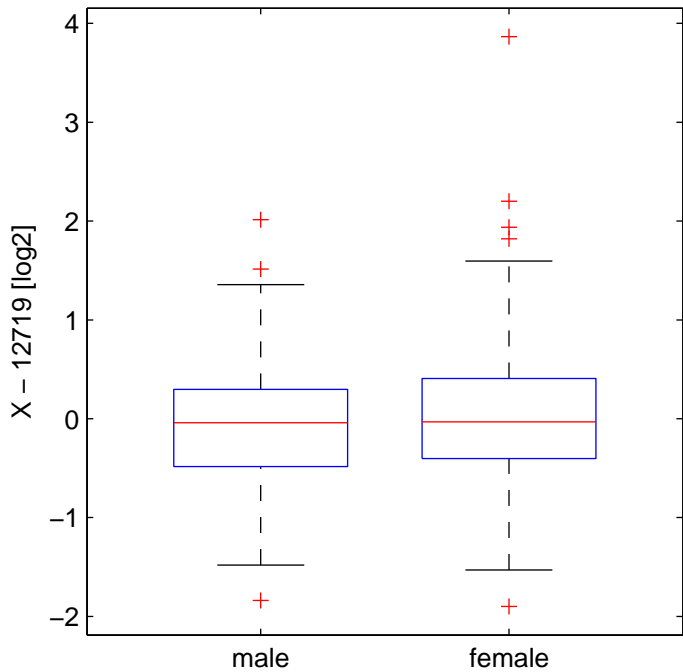

p-val: 4.99e-001

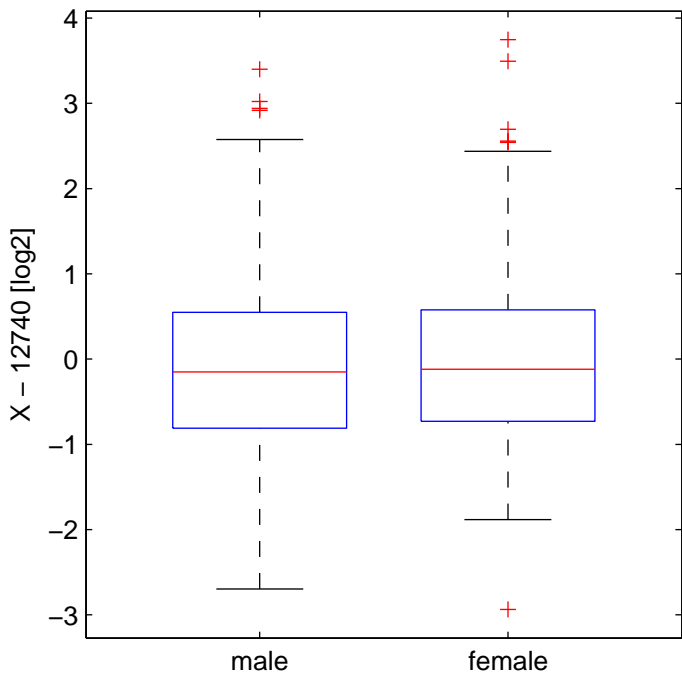

p-val: 8.37e-001

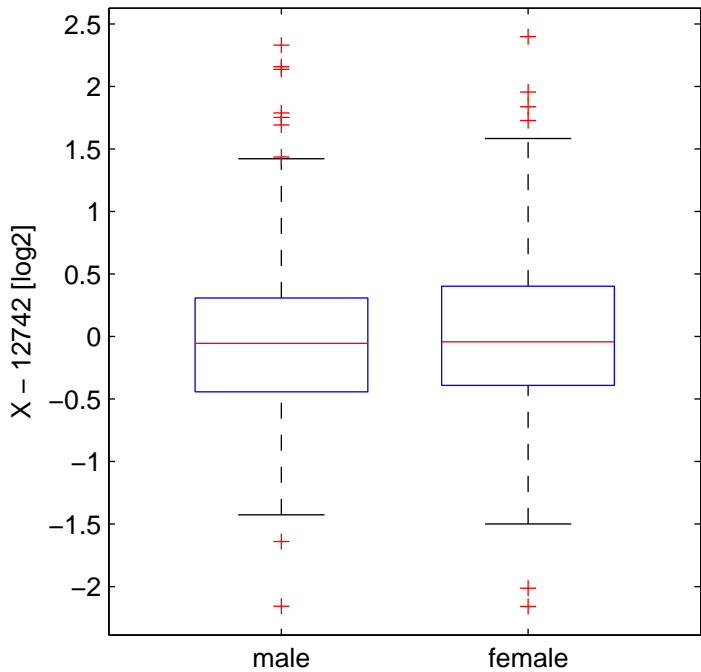

p-val: 1.99e-002

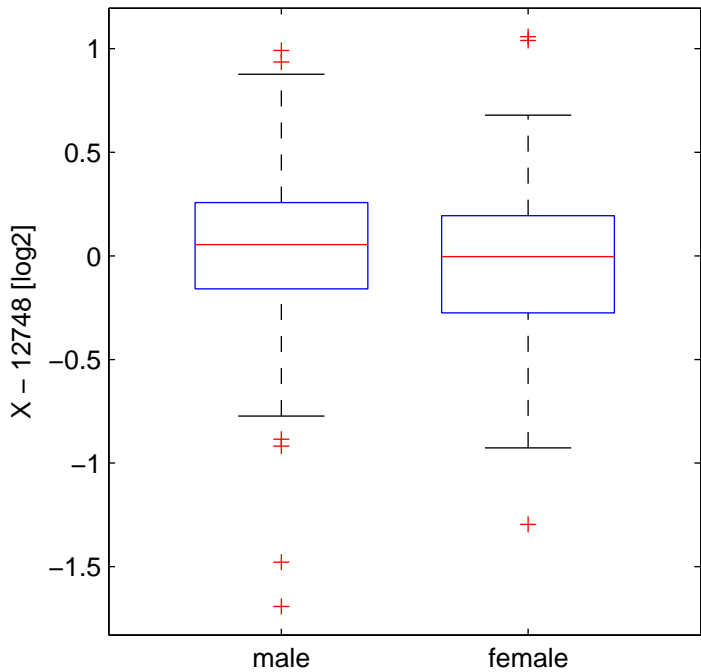



p-val: 8.57e-001

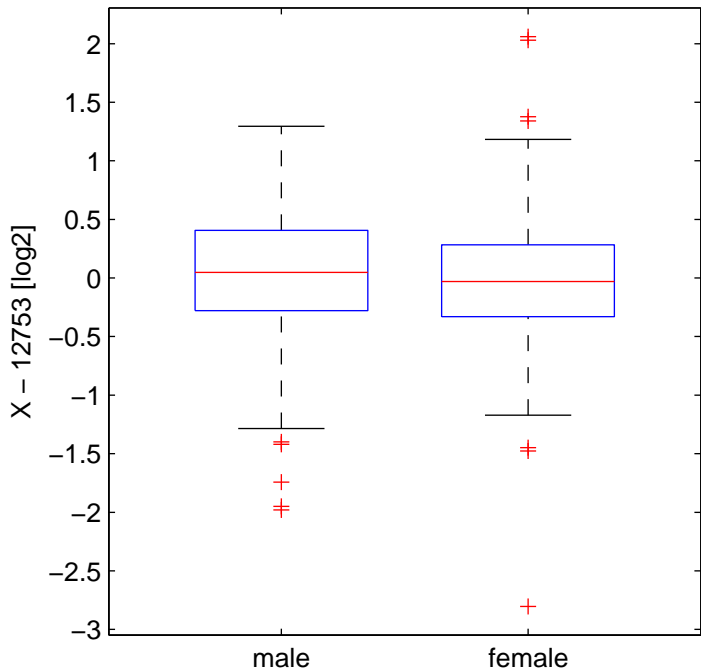

p-val: 2.37e-001

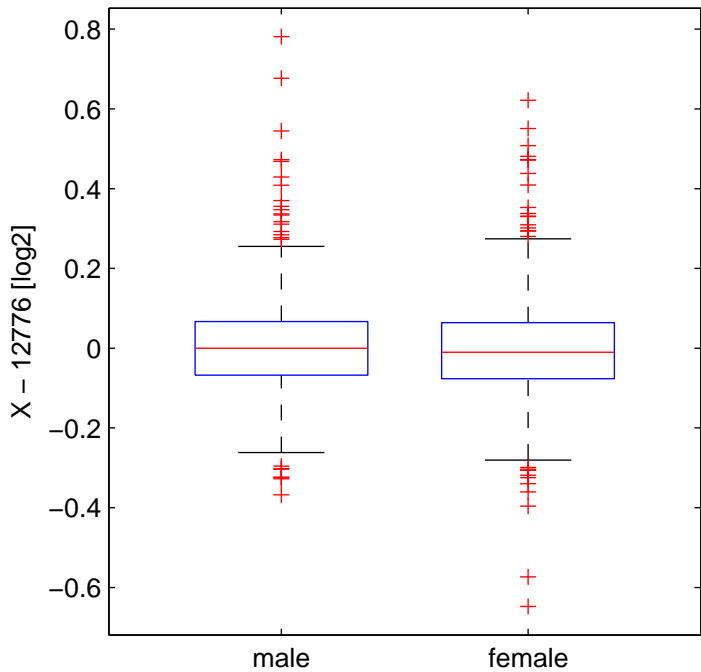

p-val: 2.73e-001

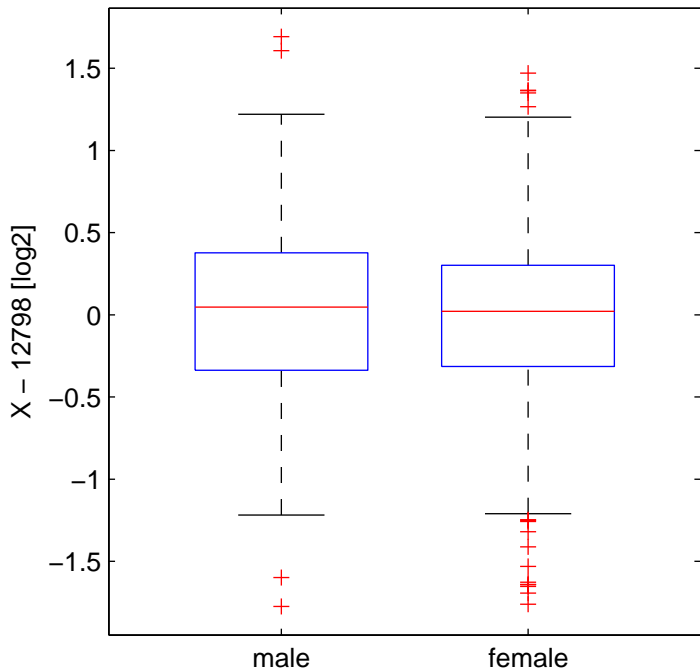

p-val: 4.36e-001

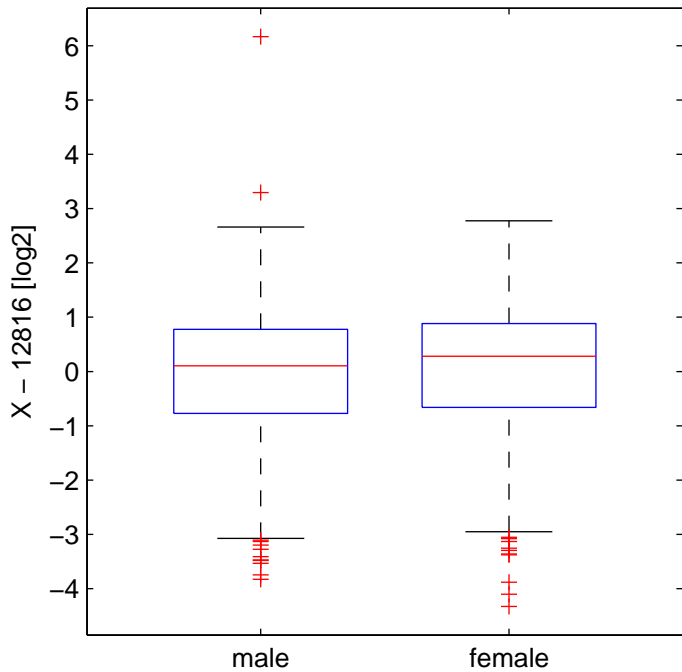

p-val: 6.29e-001

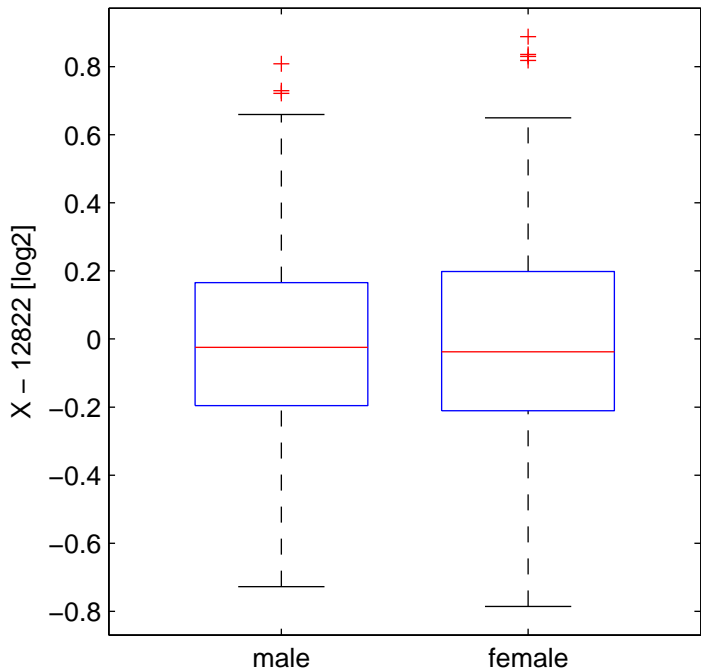

p-val: 9.06e-009

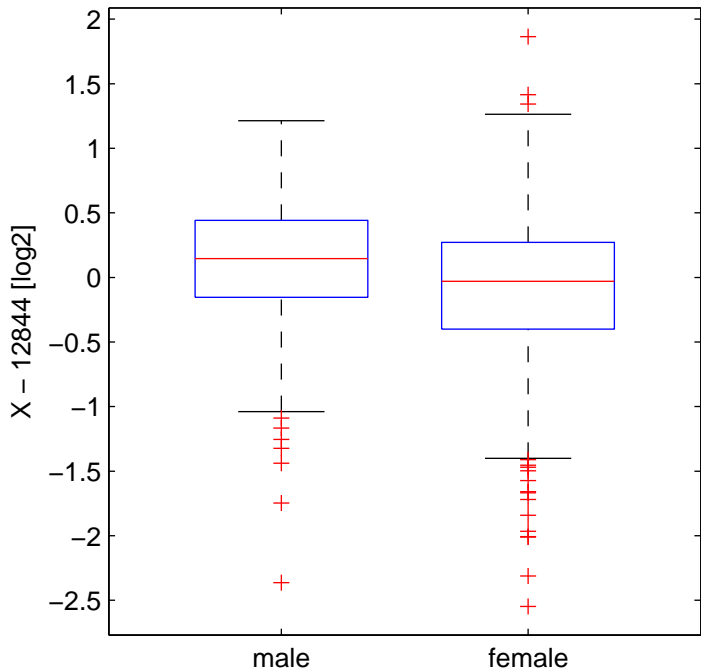

p-val: 9.42e-017

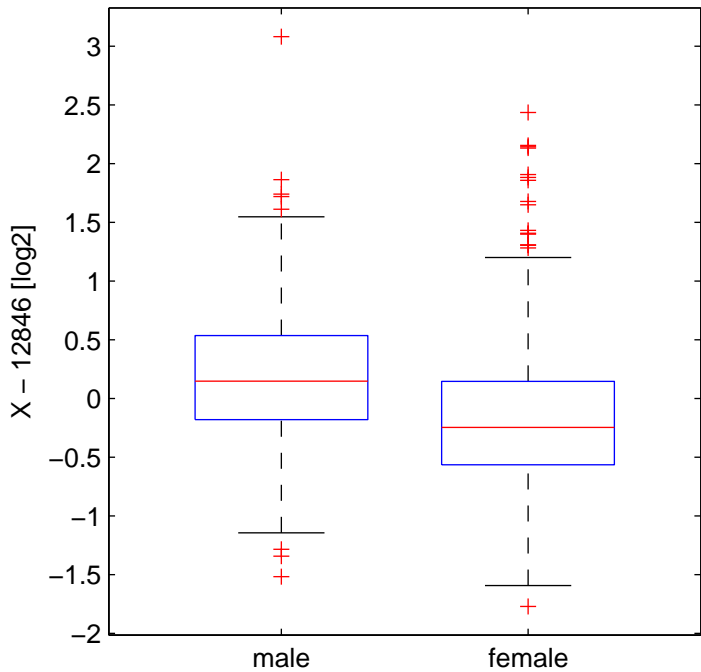

p-val: 2.78e-001

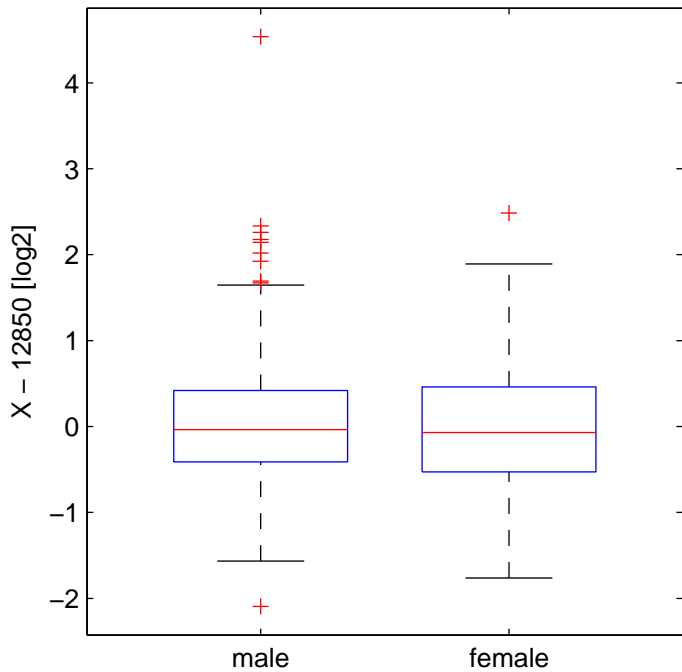



p-val: 1.28e-002

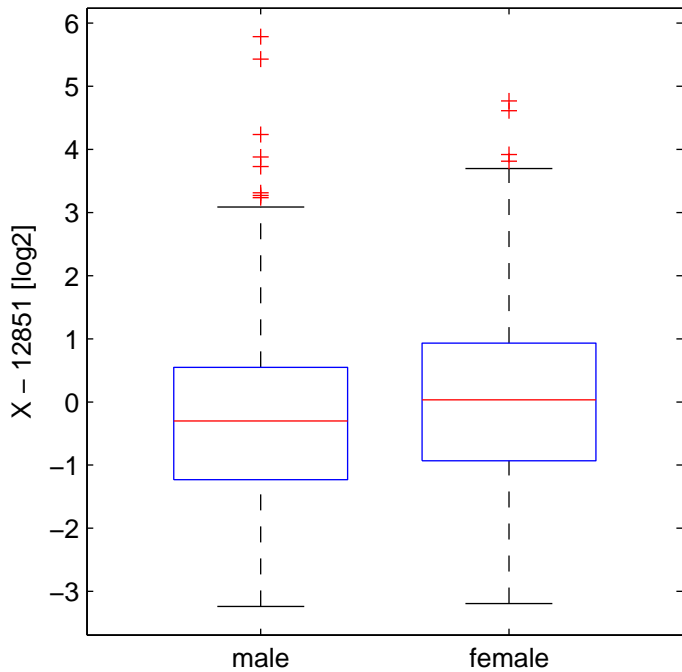

p-val: 9.25e-001

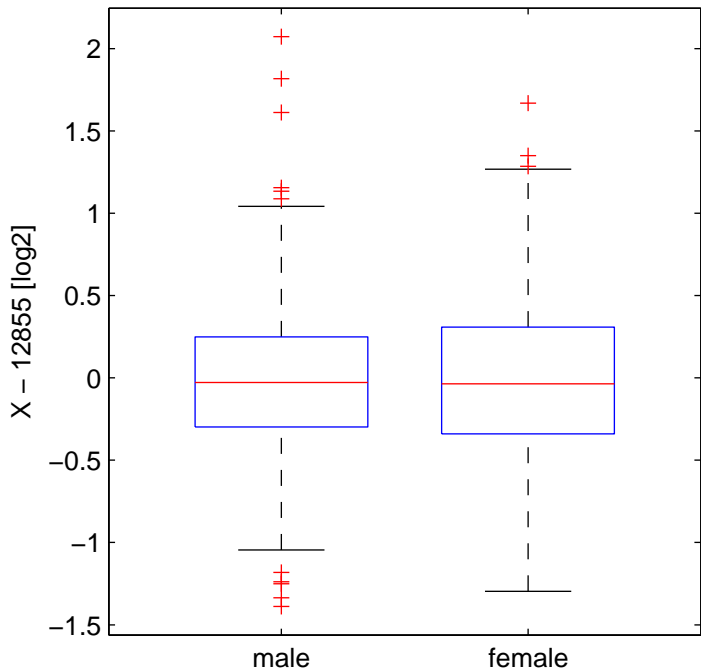

p-val: 6.60e-001

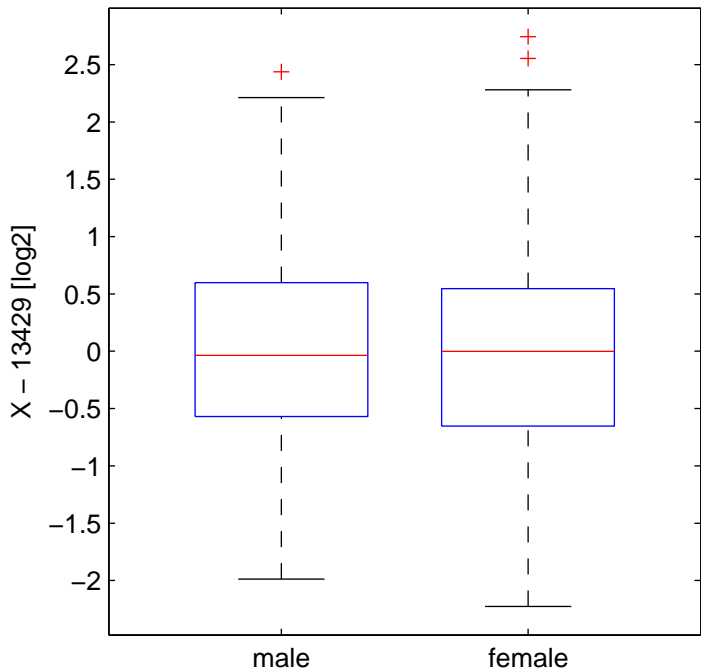

p-val:  $3.97e-026$

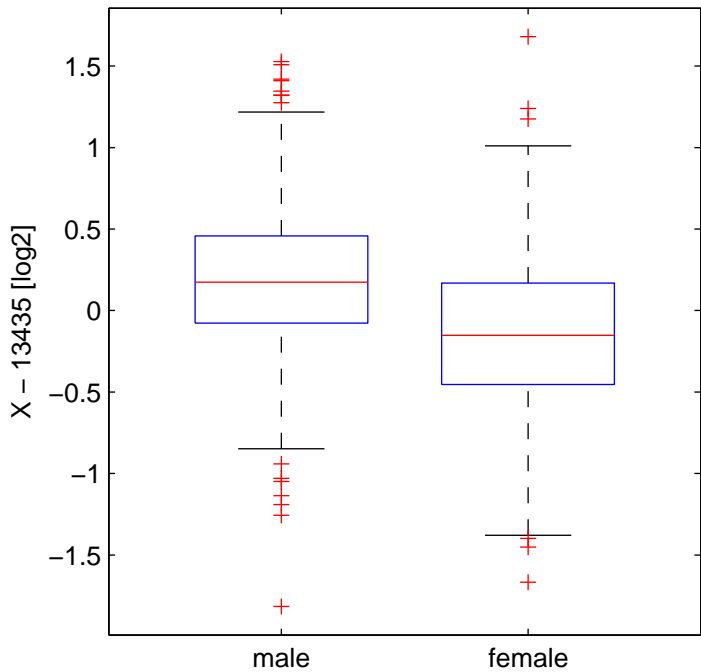

p-val: 6.35e-001

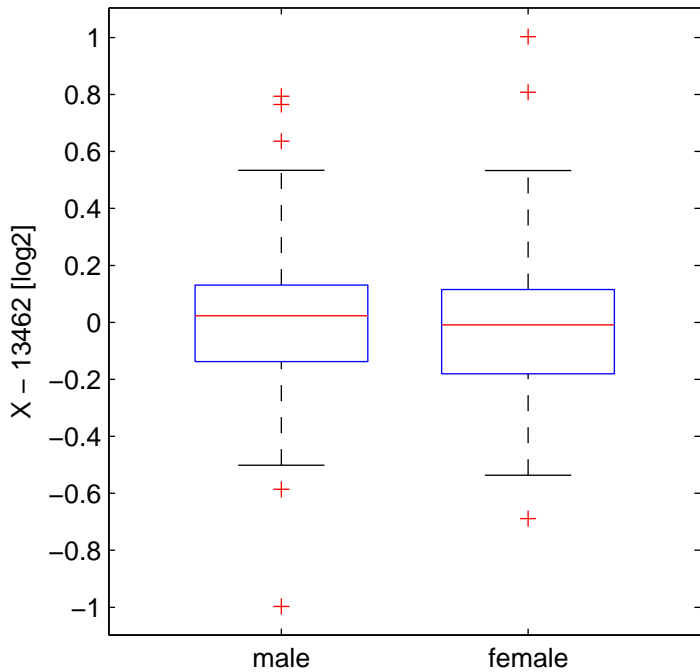

p-val: 5.83e-001

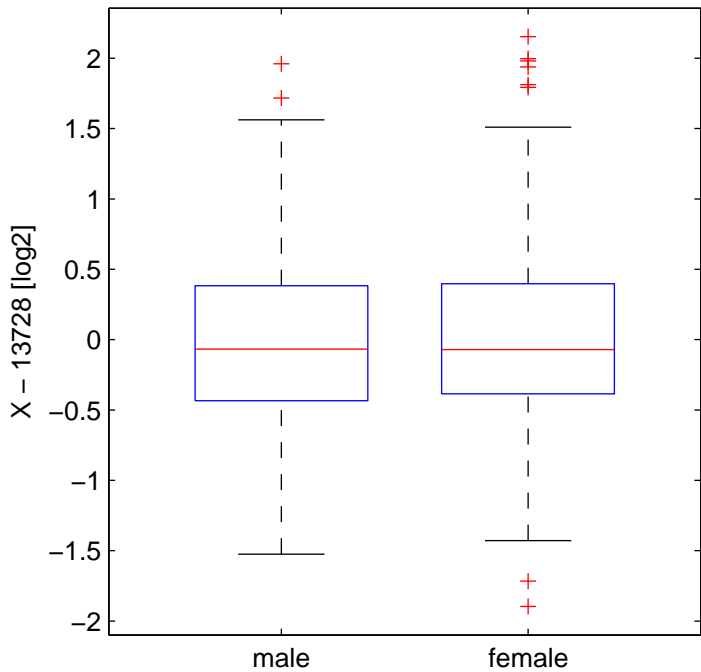

p-val: 3.42e-001

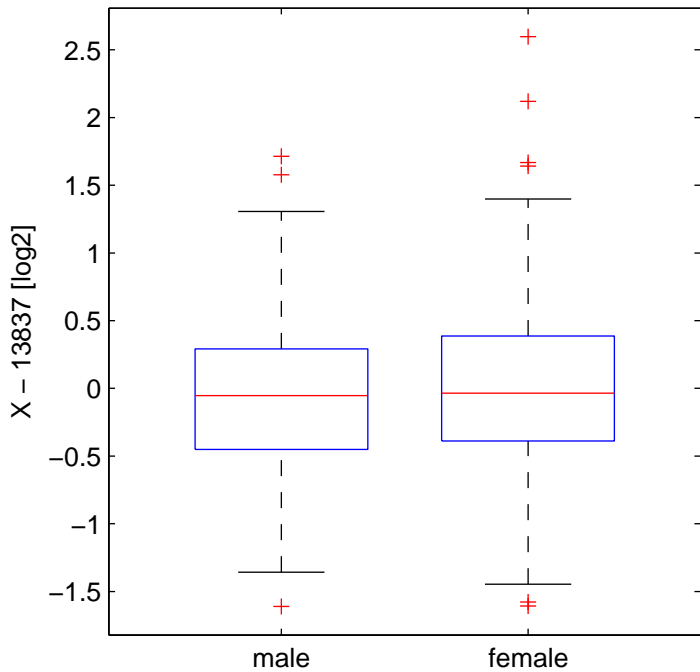

p-val: 7.11e-001

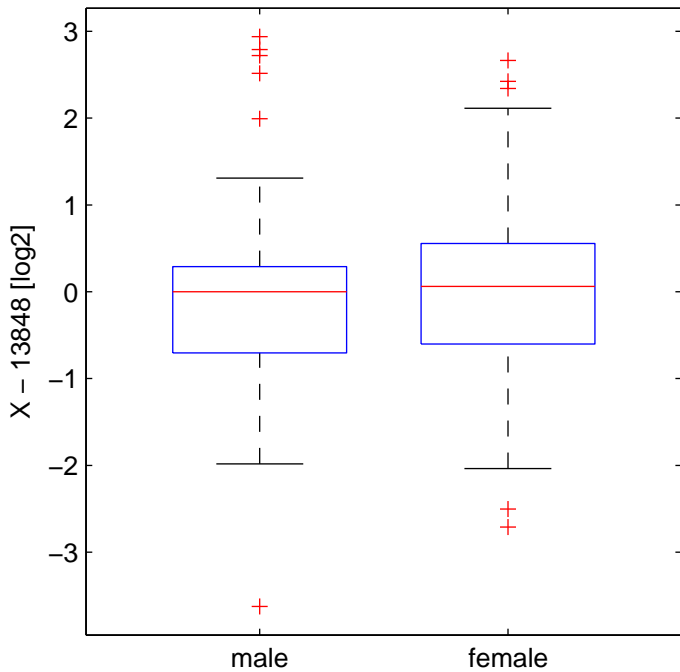



p-val: 3.48e-001

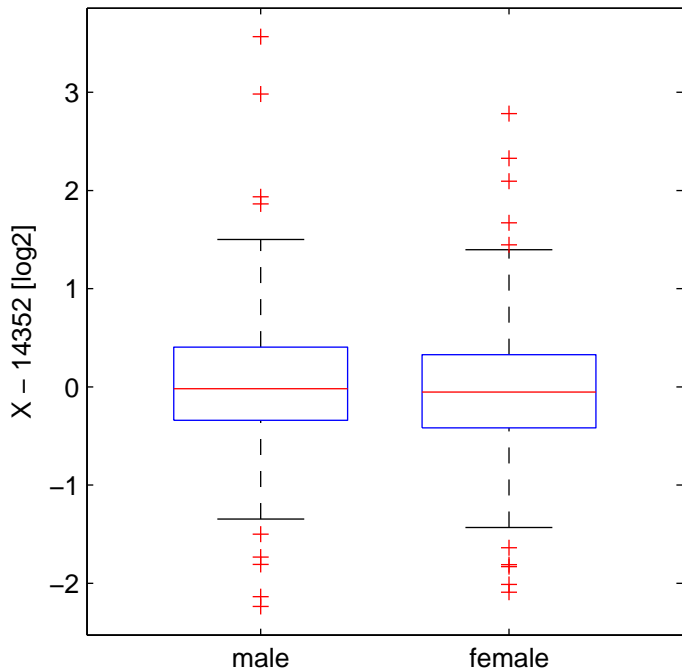

p-val: 9.70e-001

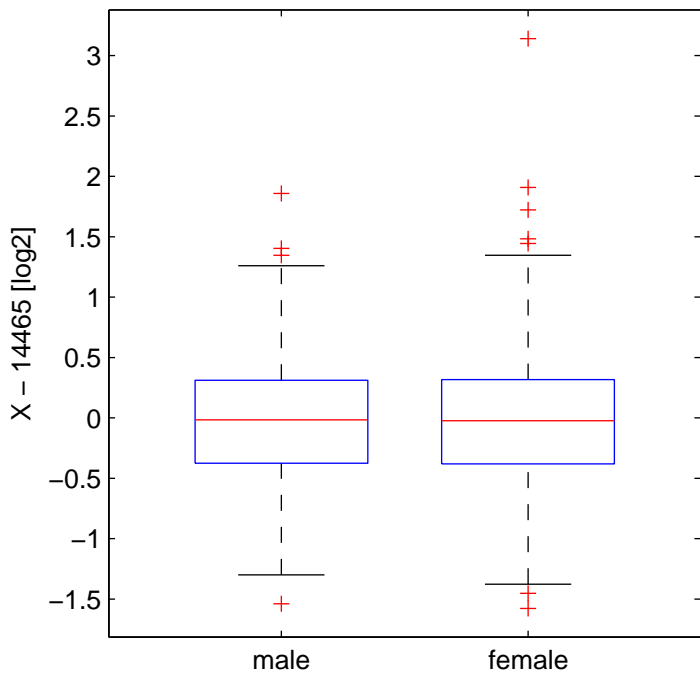

p-val: 3.73e-004

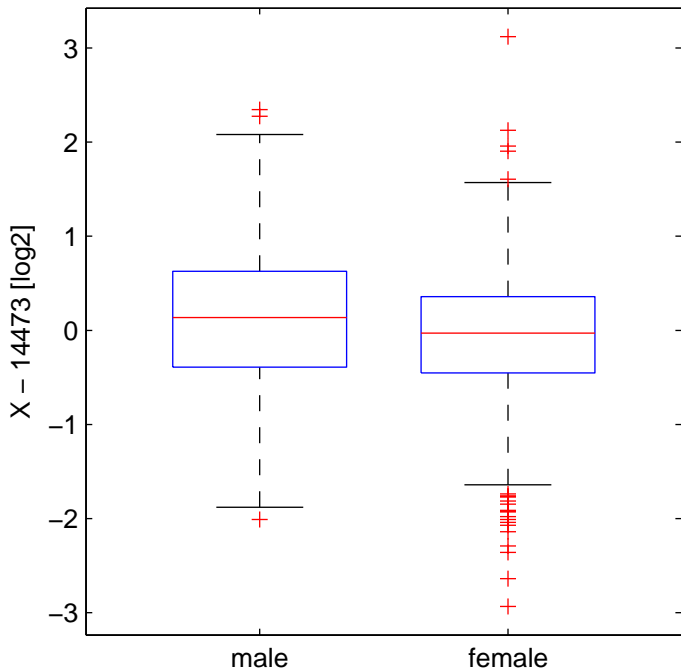

p-val: 6.58e-004

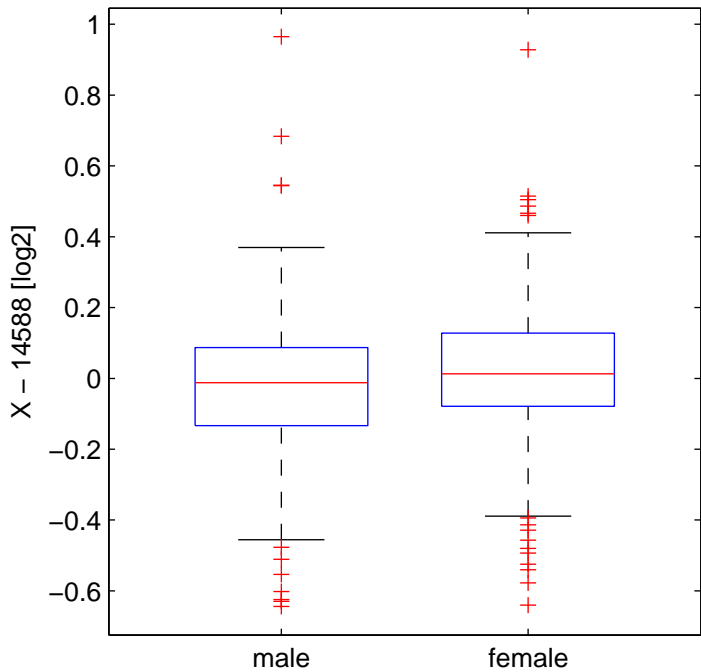

p-val: 5.11e-001

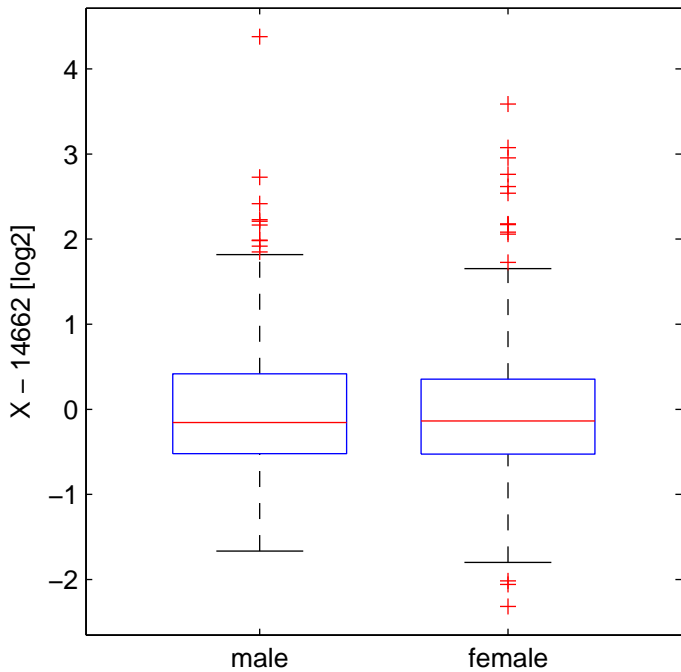

p-val: 5.40e-001

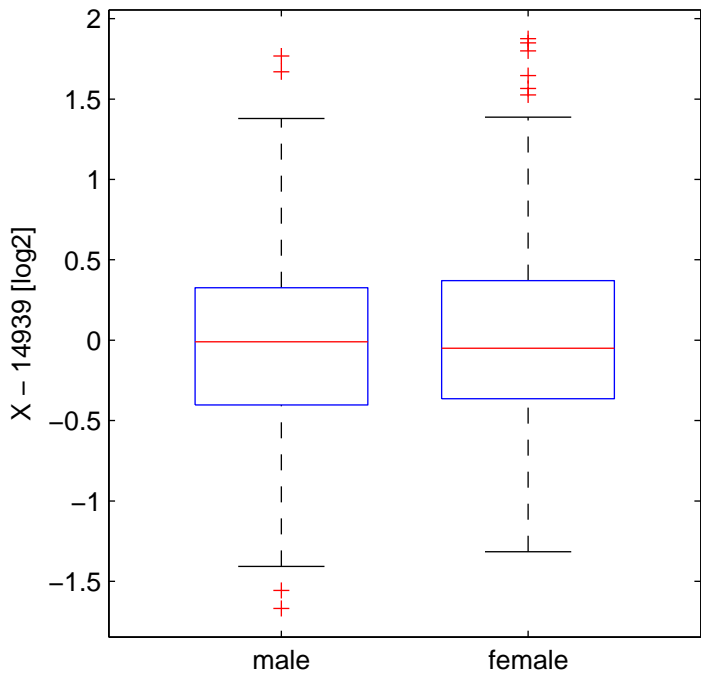

p-val: 9.59e-002

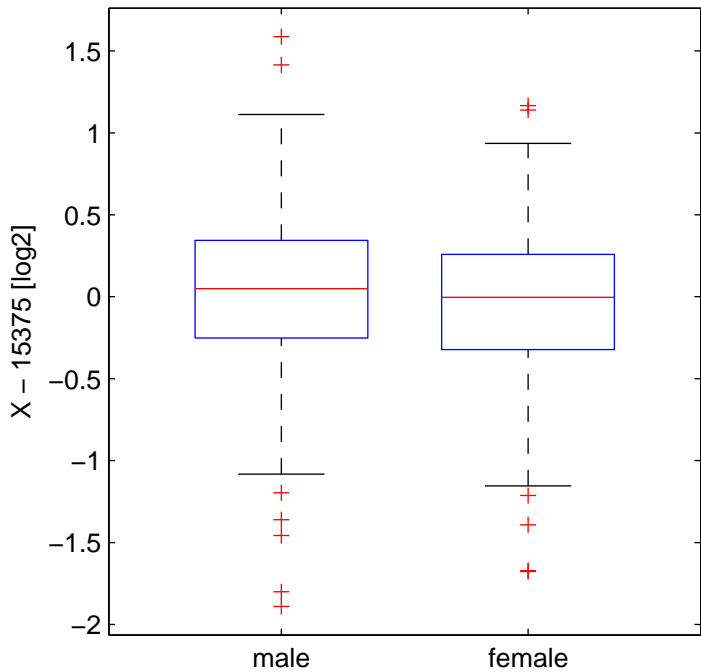

p-val: 2.26e-005

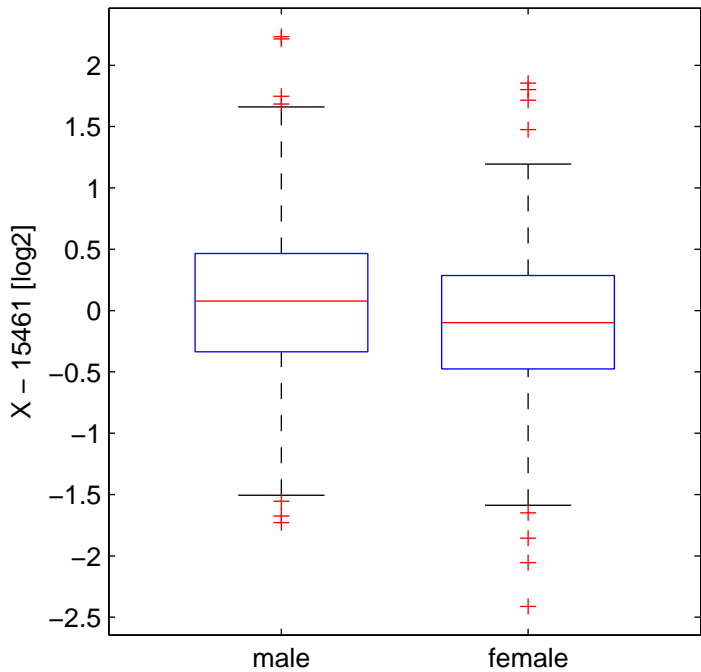



p-val: 4.66e-001

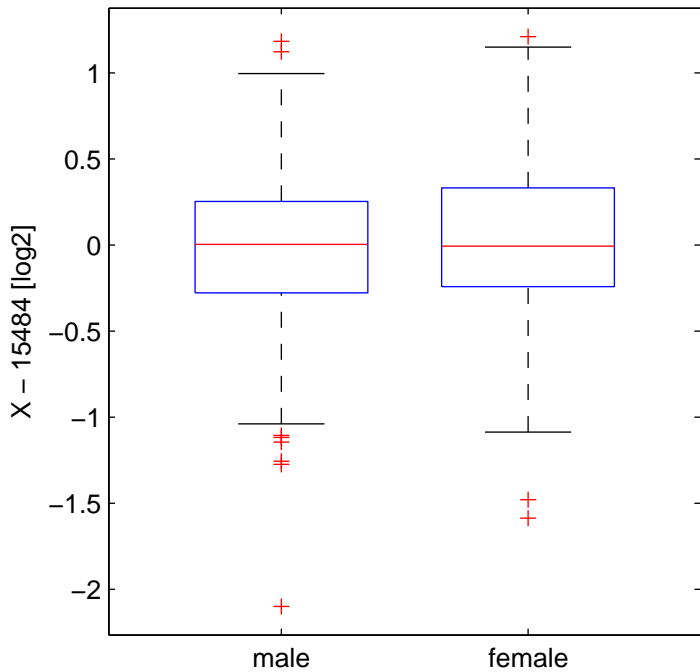

p-val: 1.93e-002

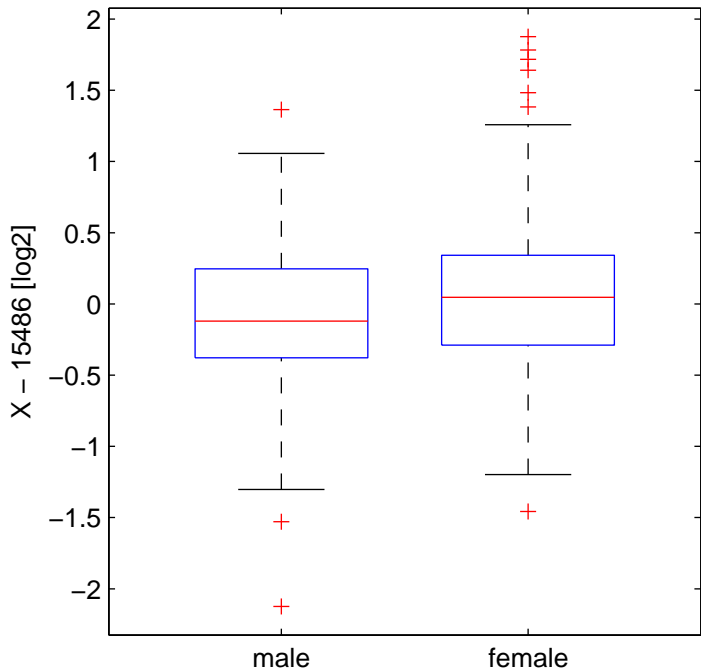

p-val: 3.10e-001

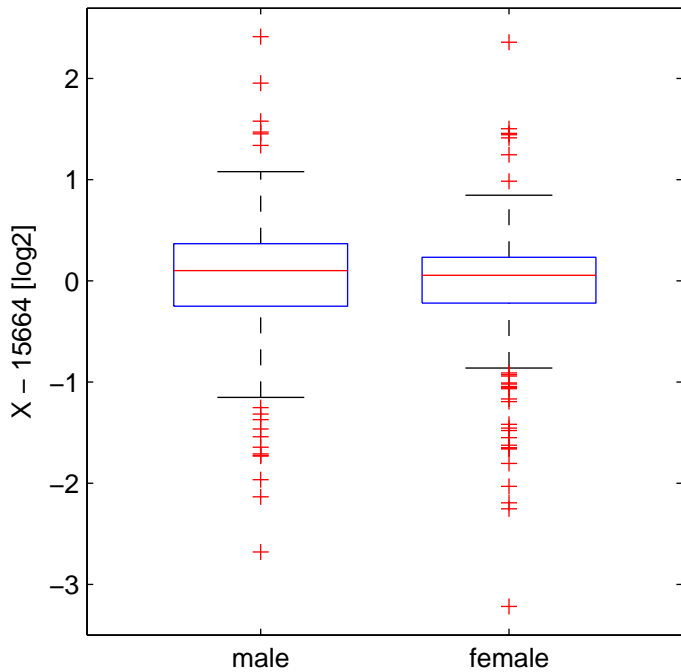

p-val: 3.62e-002

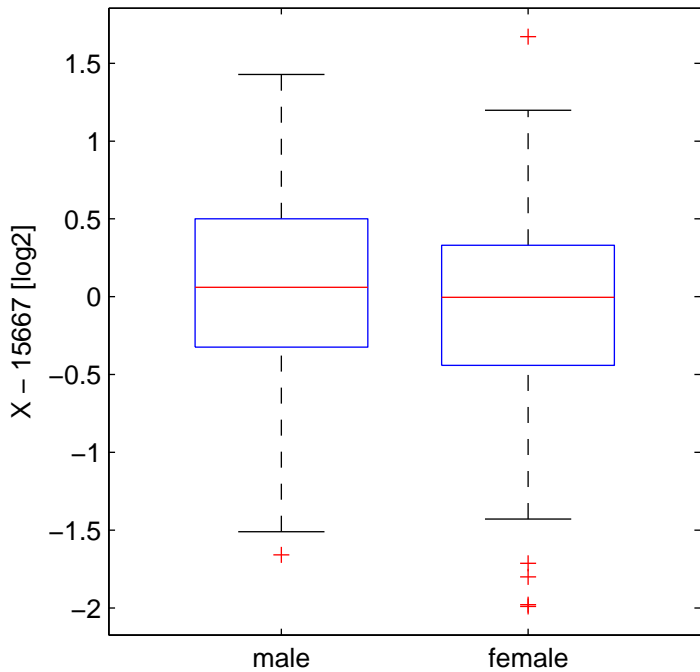

p-val: 4.79e-001

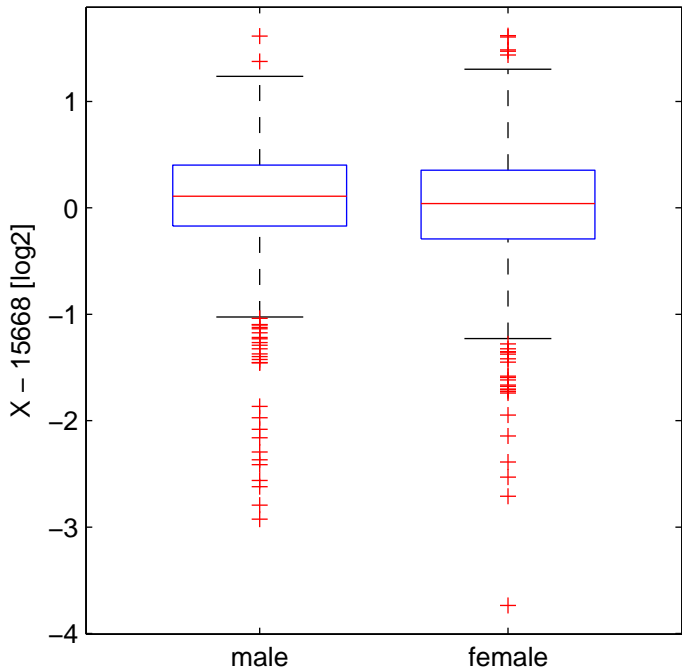

p-val: 6.55e-002

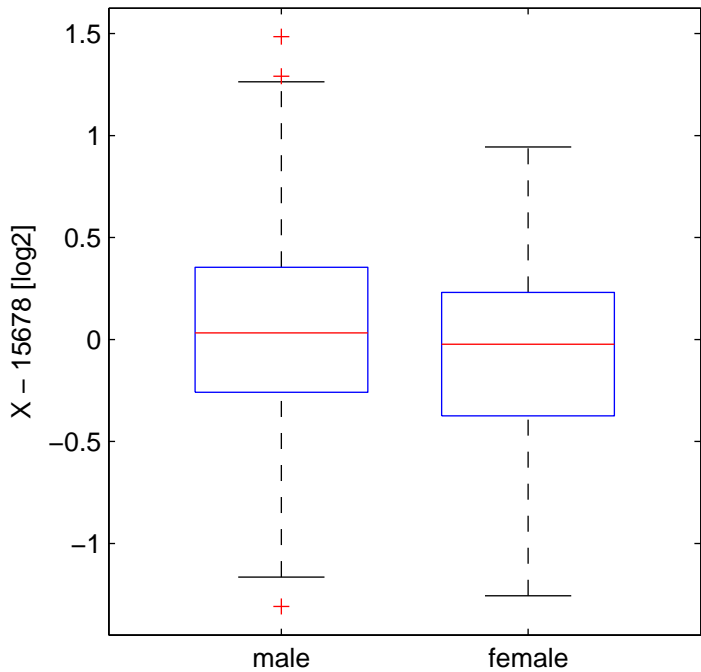

p-val: 9.44e-001

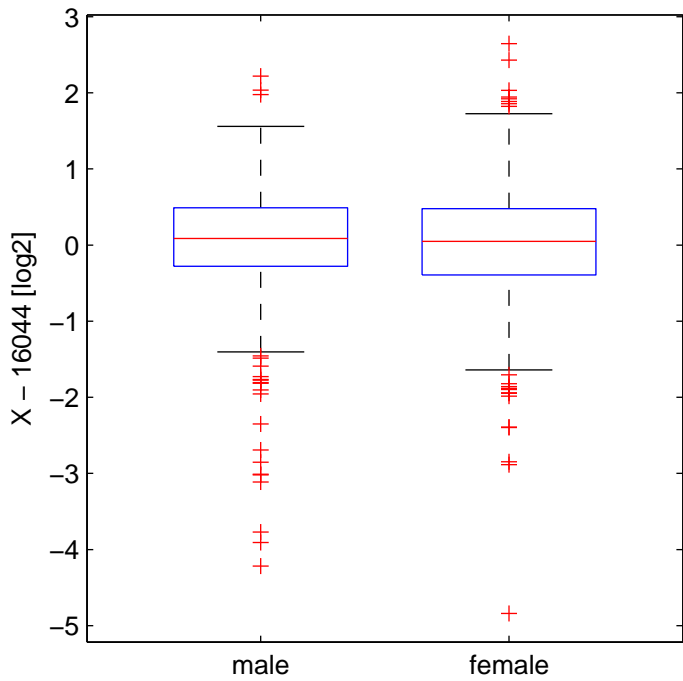

p-val: 6.32e-003

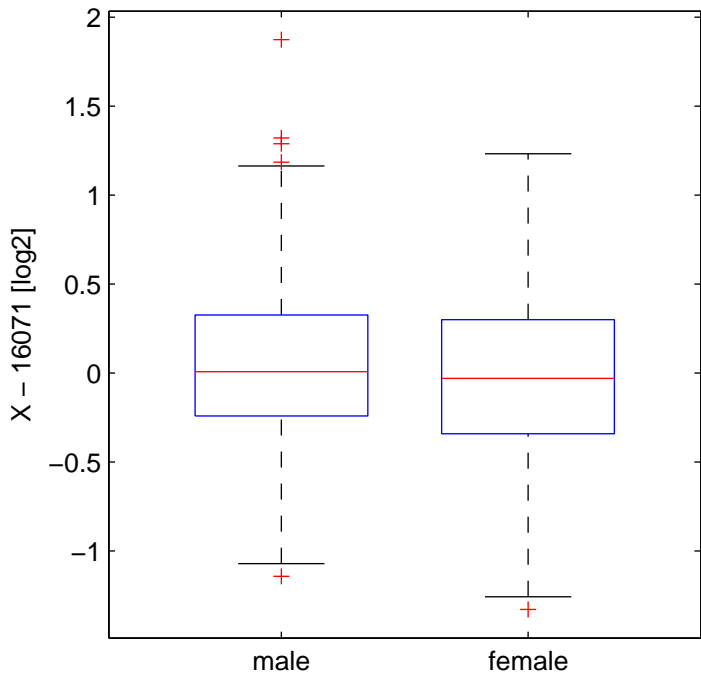



p-val: 1.23e-001

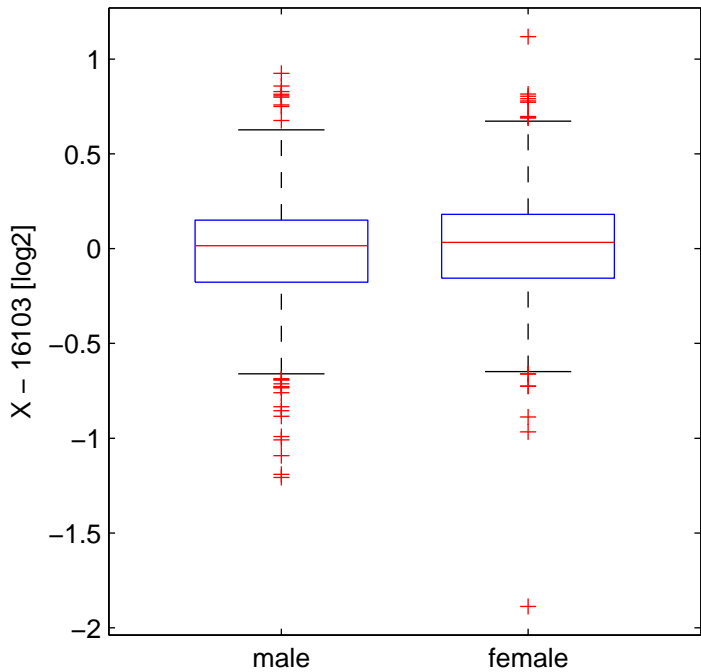

p-val: 3.87e-002

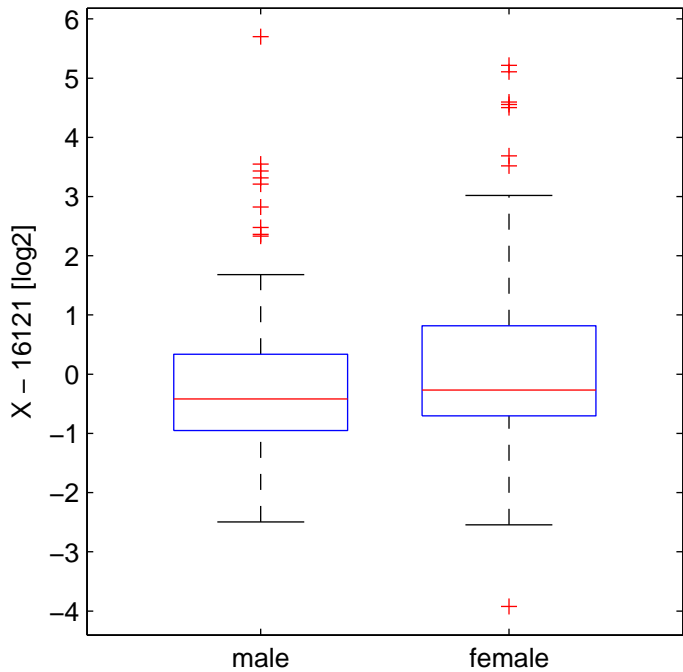

p-val: 7.57e-011

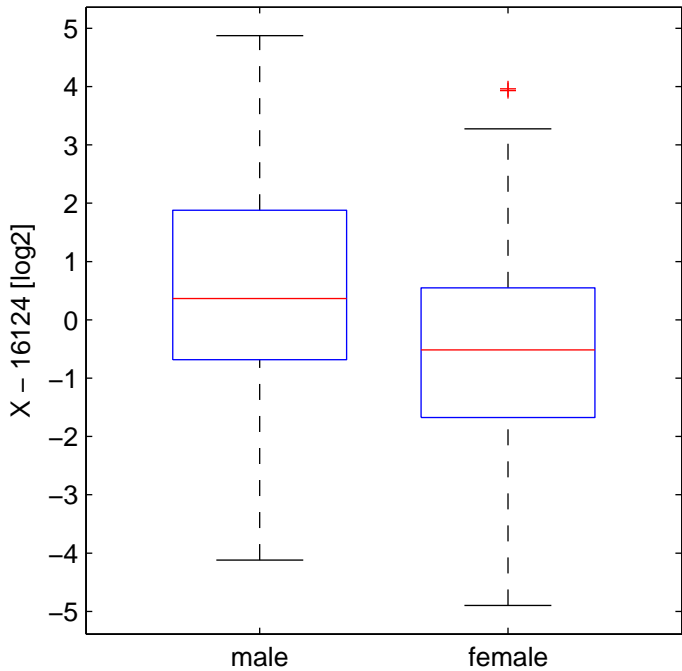

p-val: 1.30e-001

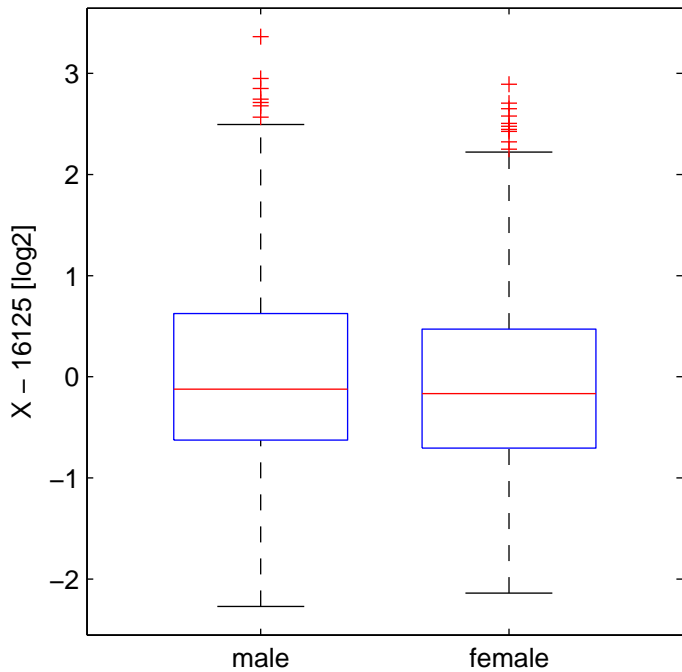

p-val: 9.91e-001

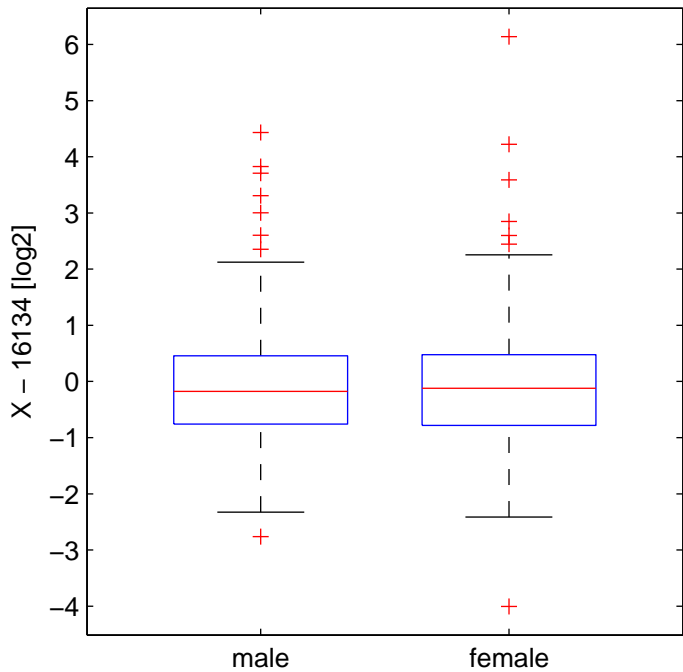

p-val: 8.46e-001

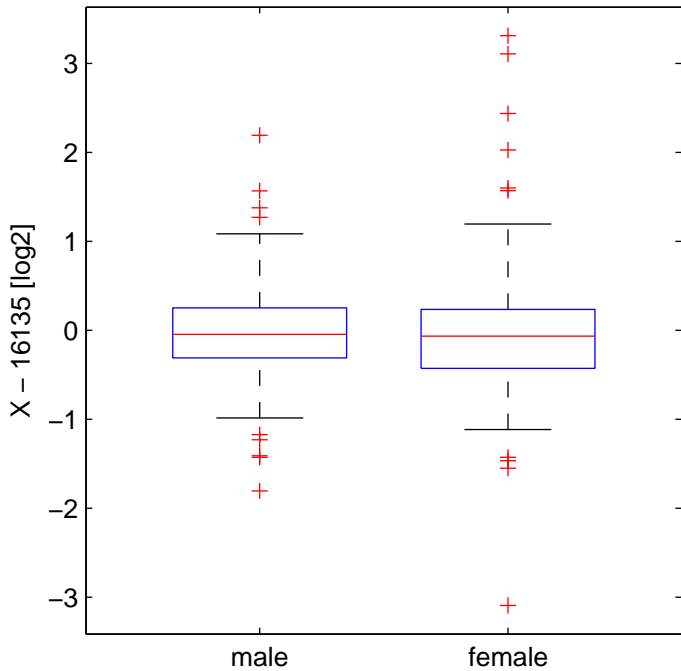

p-val: 8.23e-004

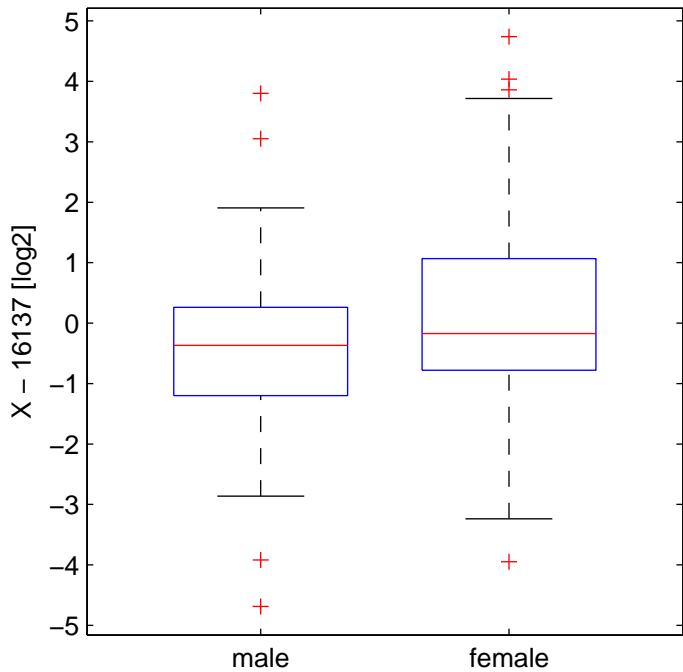

p-val: 7.39e-001

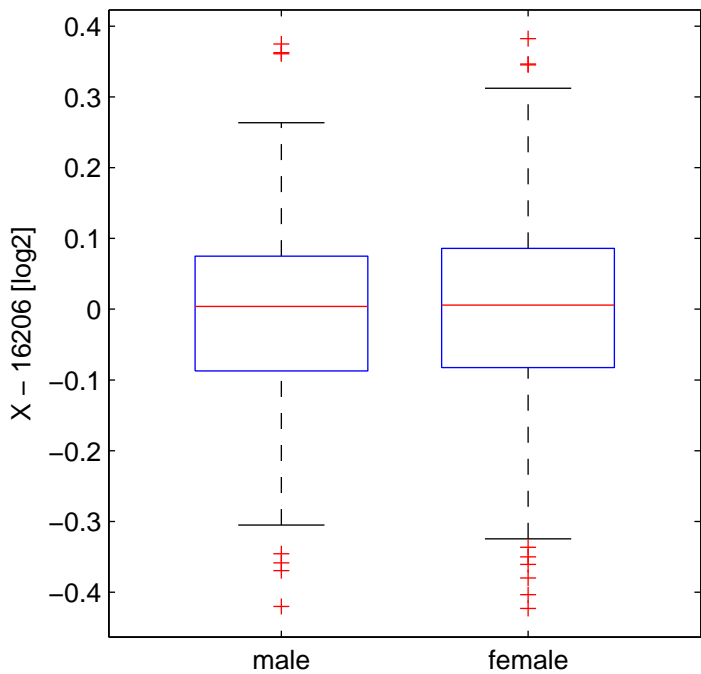



p-val: 3.97e-033

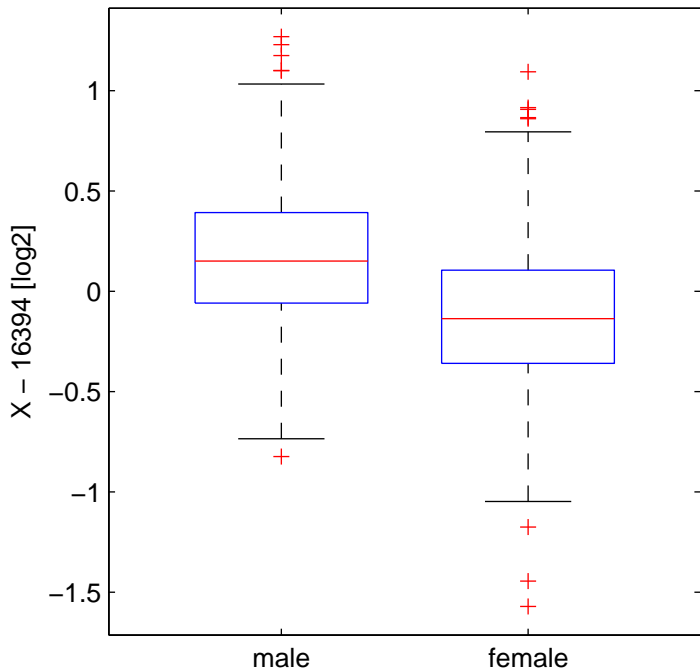

p-val: 9.33e-001

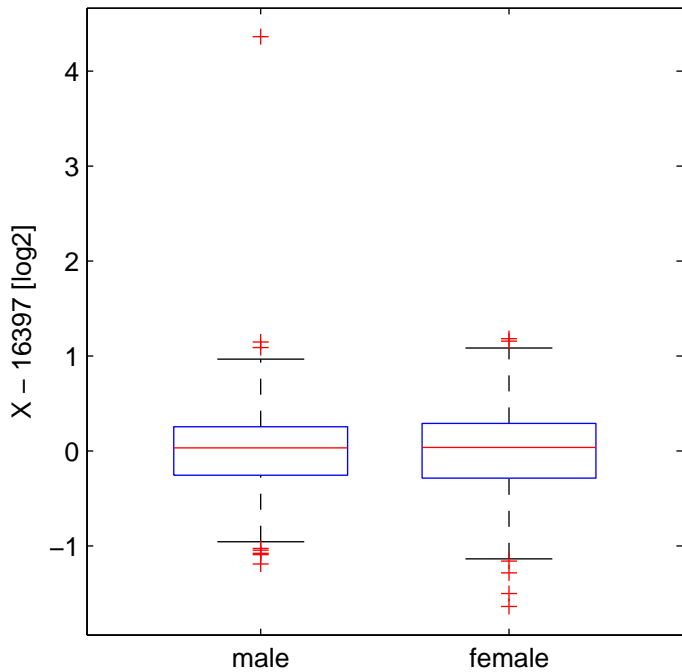

p-val: 8.10e-001

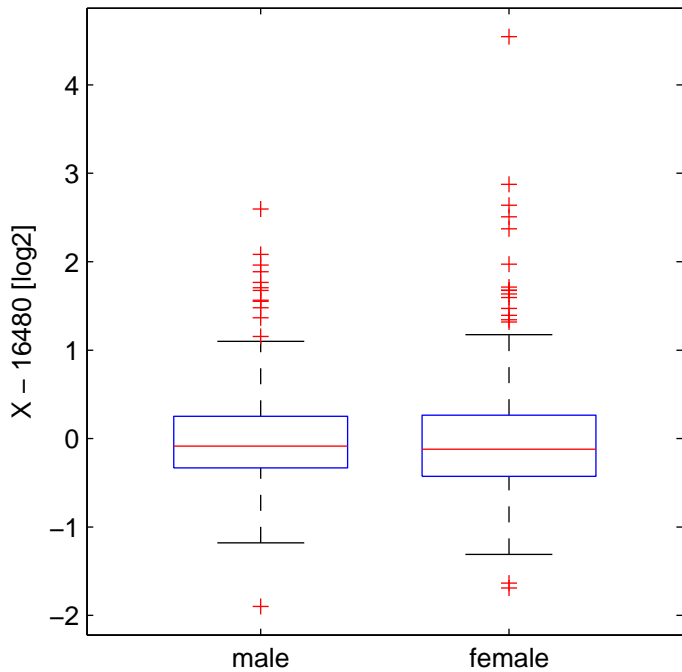

p-val: 9.49e-003

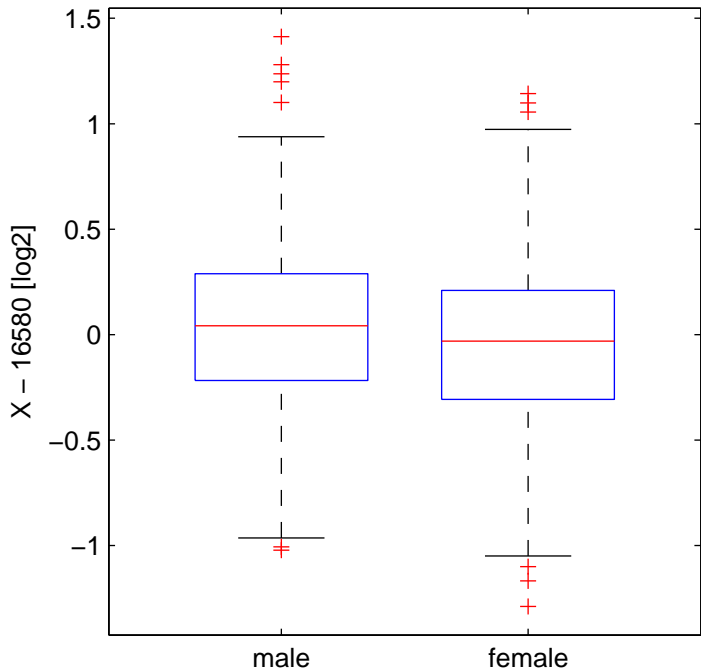



p-val: 1.41e-023

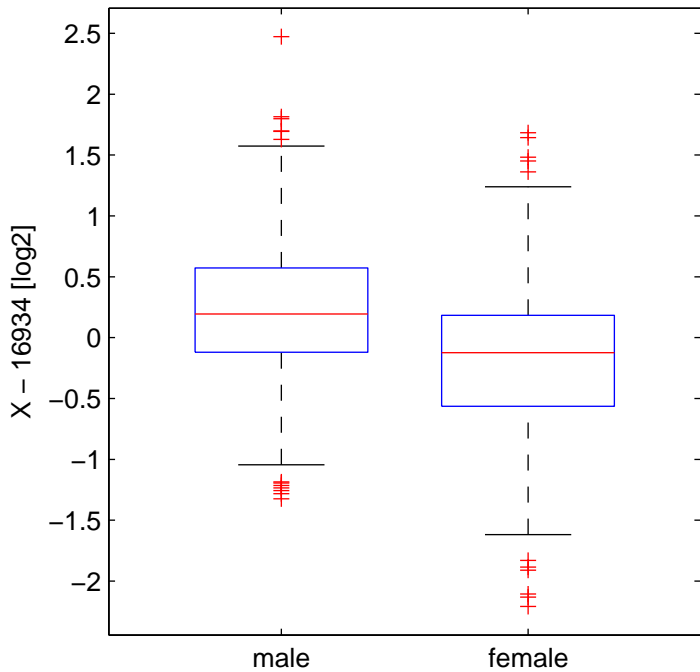

p-val: 5.55e-001

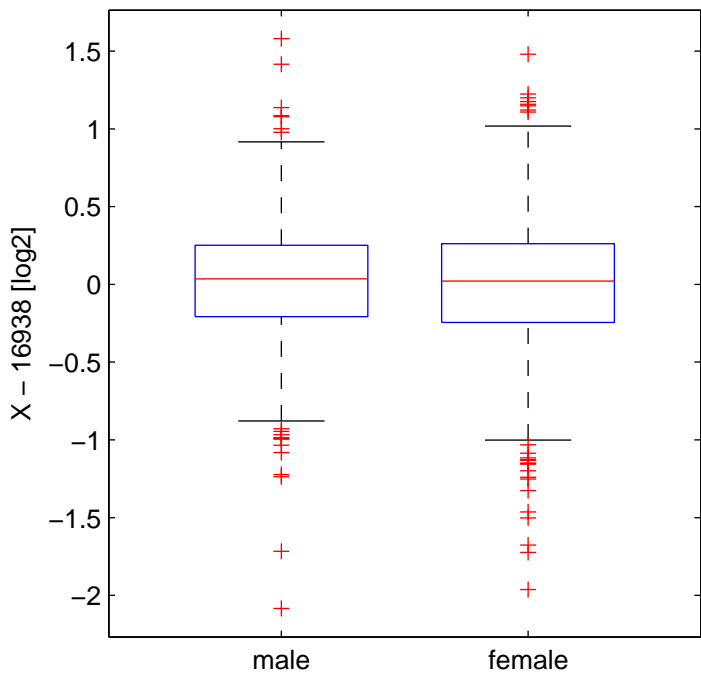

p-val: 6.92e-001

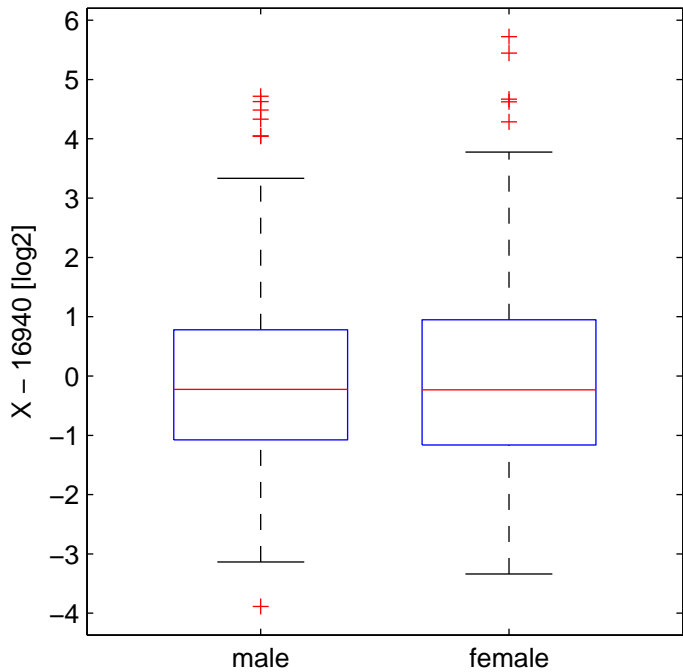



p-val: 5.73e-005

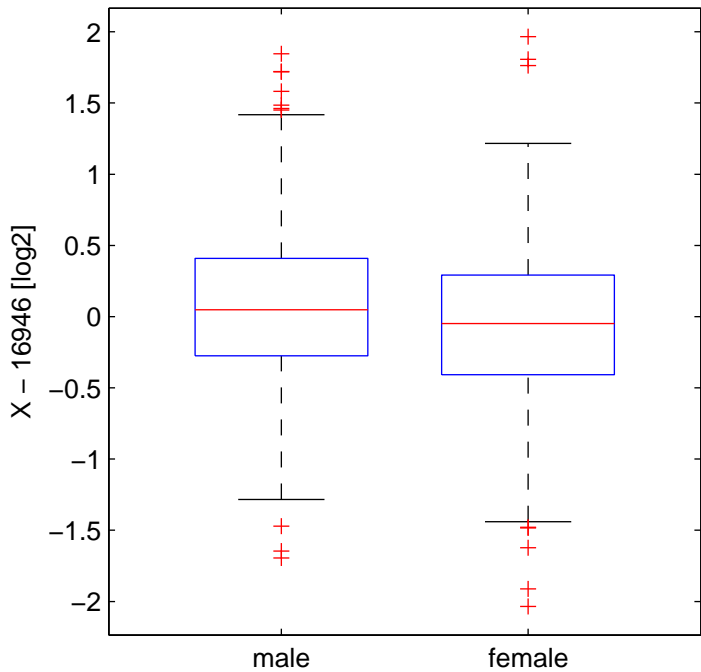

p-val: 8.10e-001

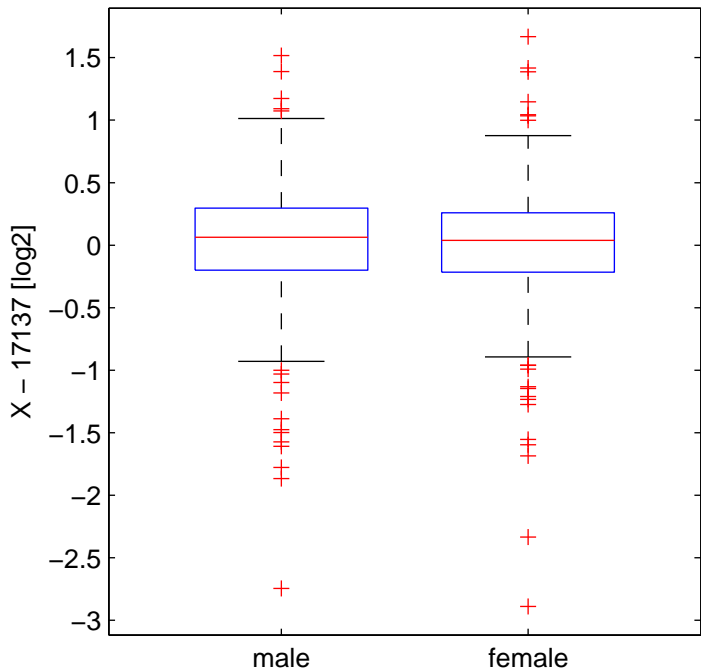

p-val: 5.72e-001

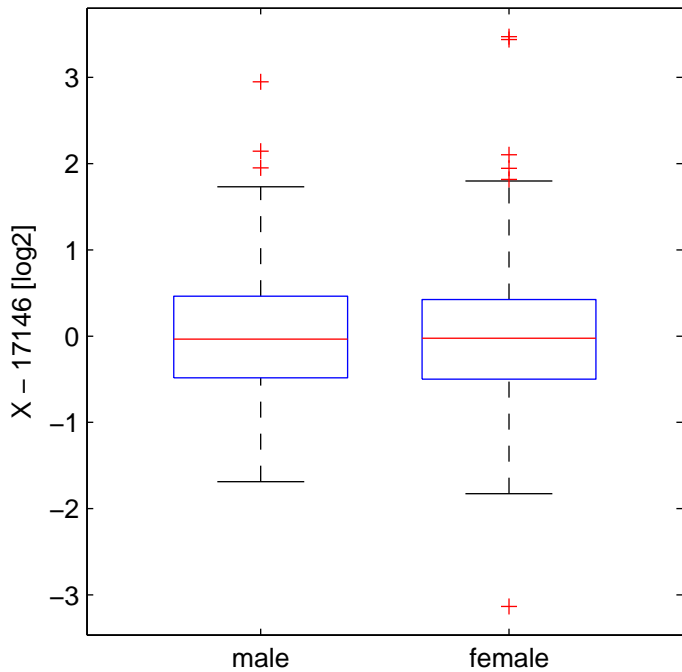

p-val: 3.89e-001

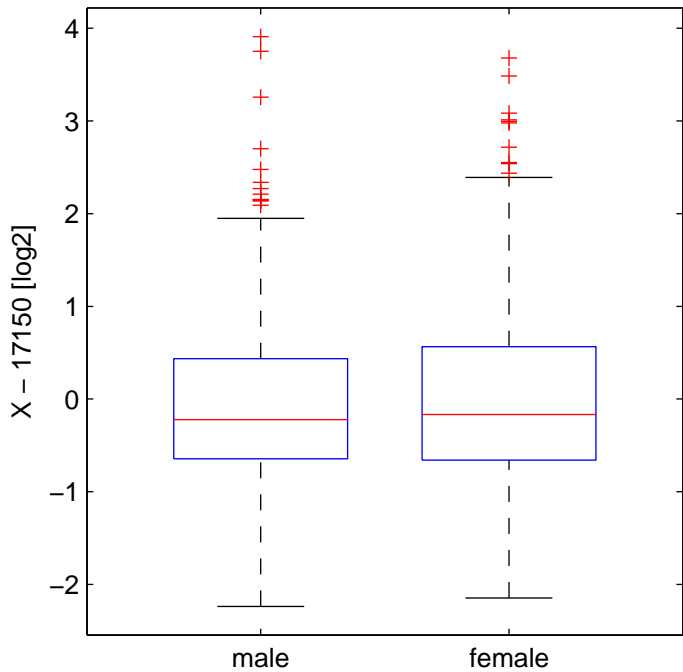



p-val: 6.44e-001

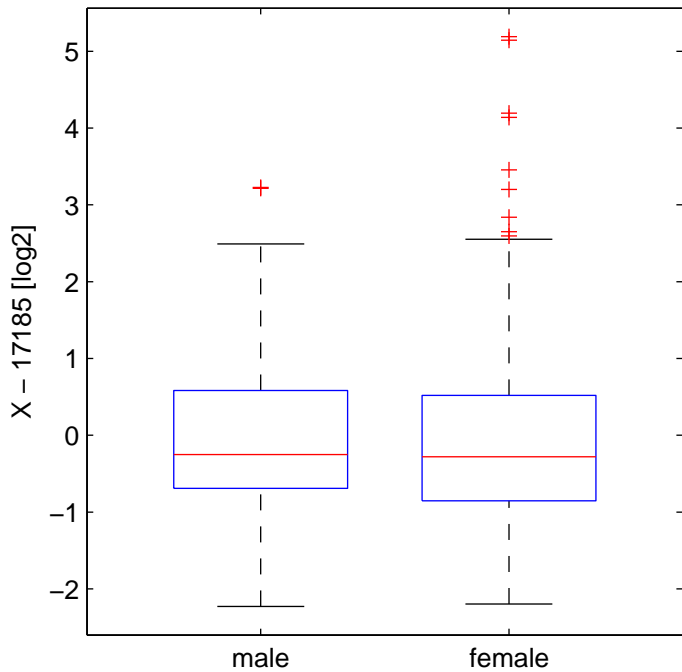

p-val: 4.86e-001

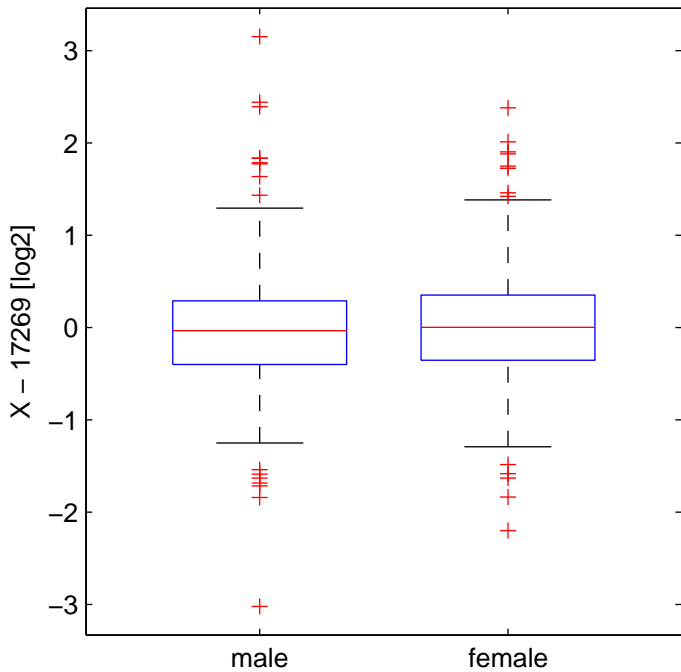

p-val: 7.15e-001

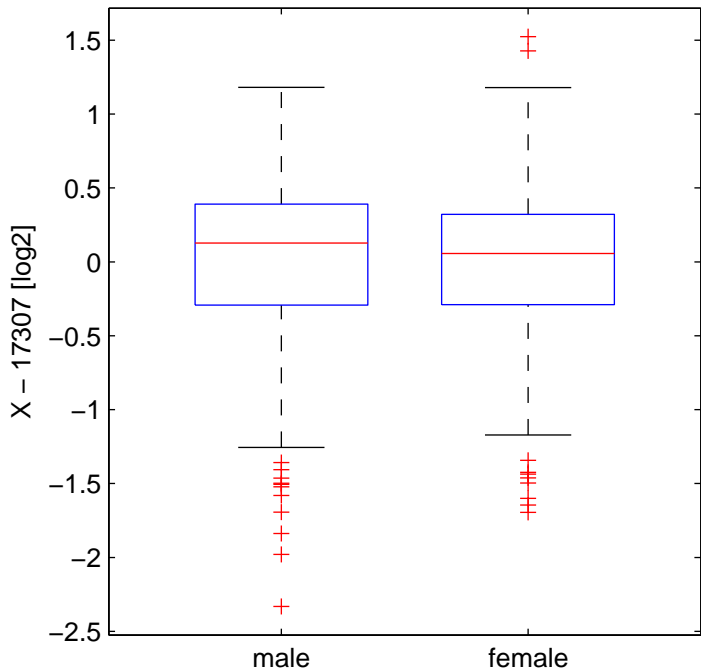



p-val: 2.17e-002

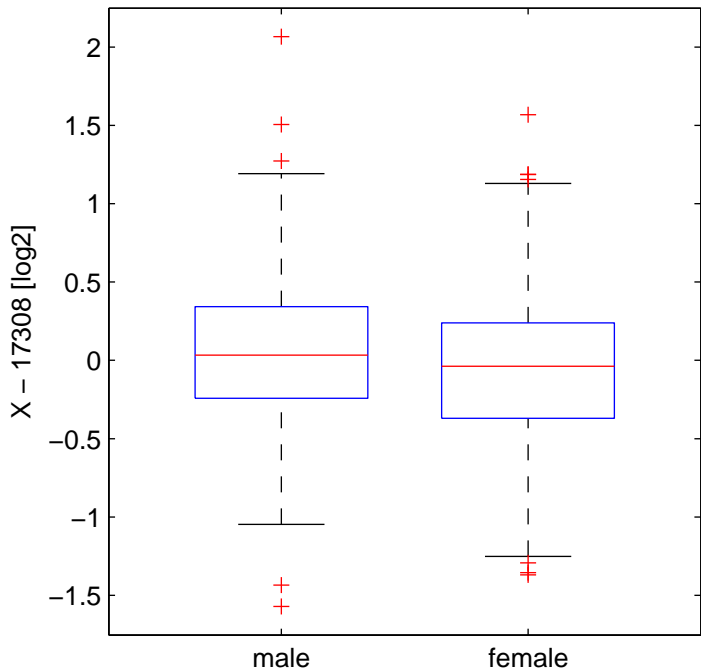

p-val: 3.77e-001

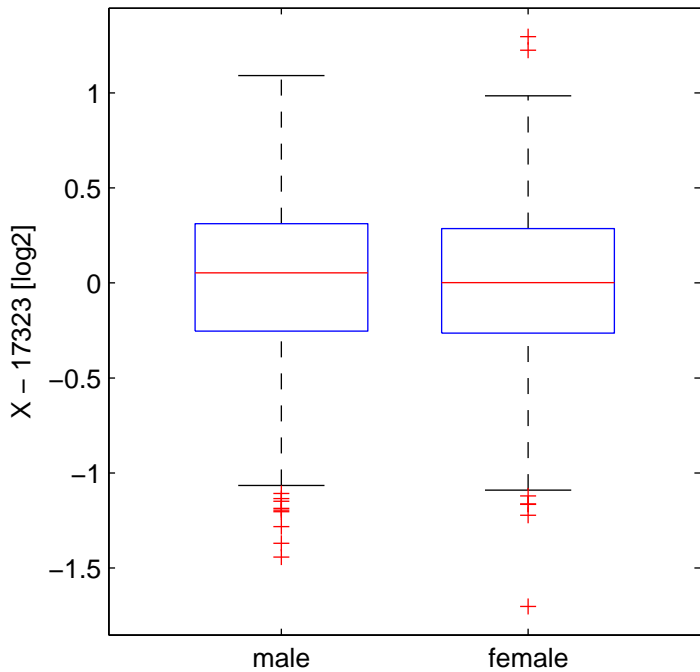

p-val: 3.04e-001

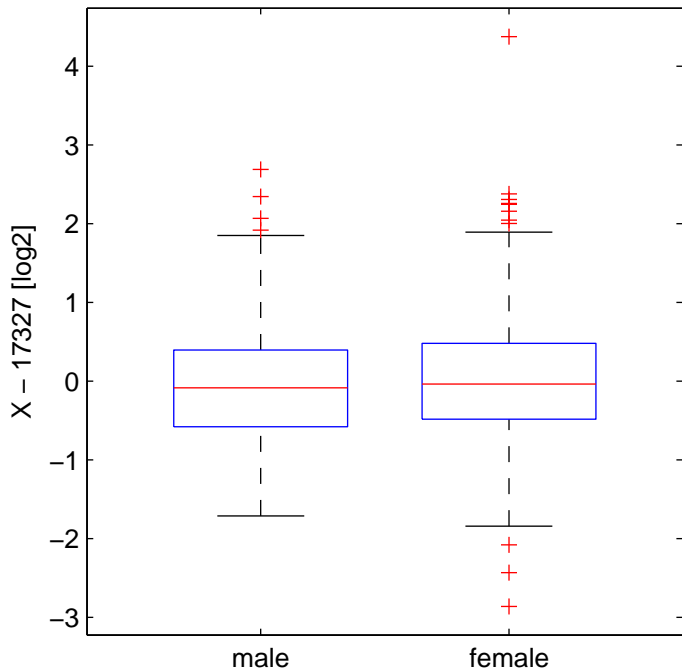

p-val: 4.43e-014

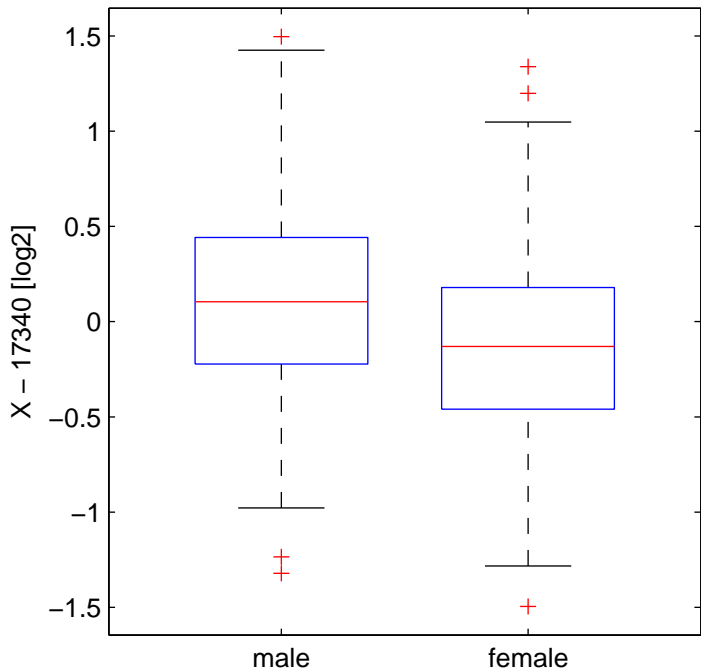

p-val: 2.40e-014

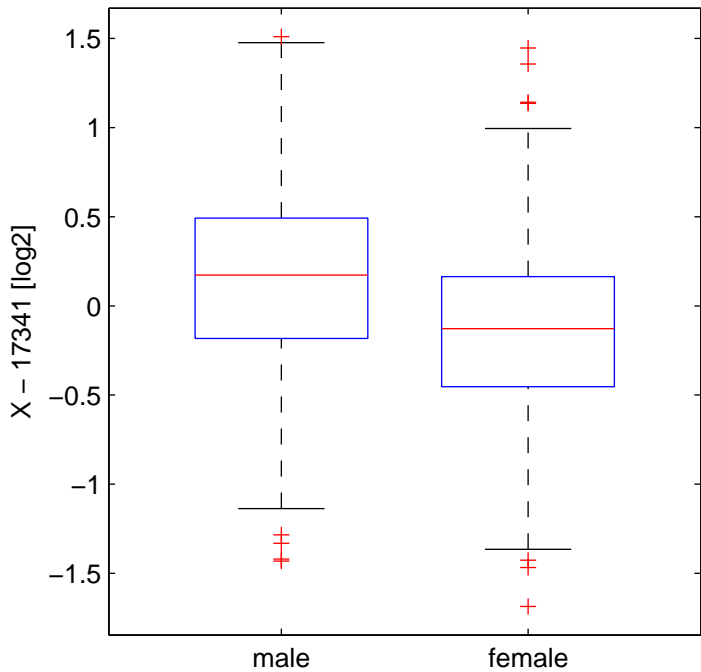

p-val: 1.93e-001

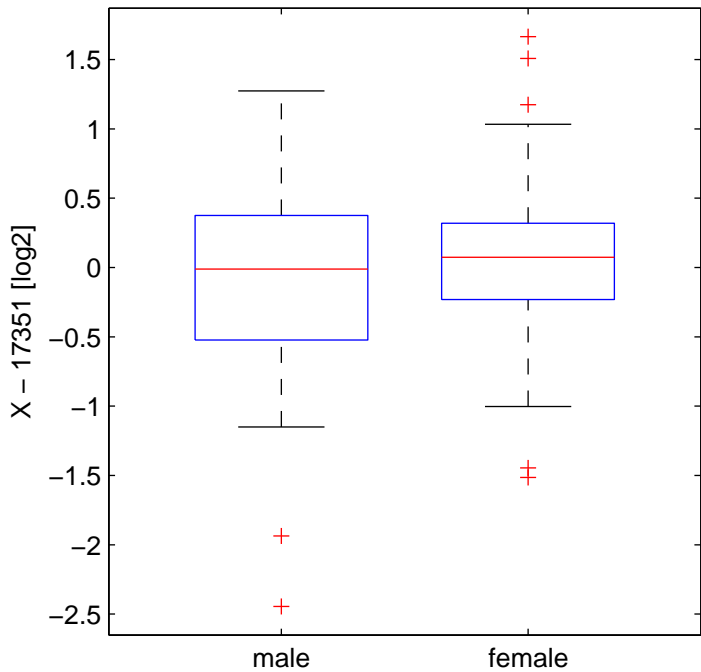

p-val: 8.01e-002

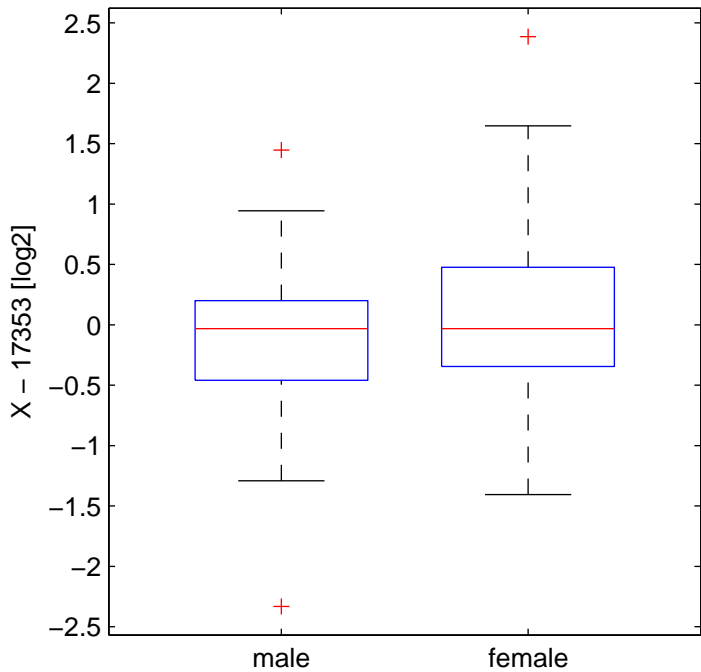

p-val: 1.48e-007

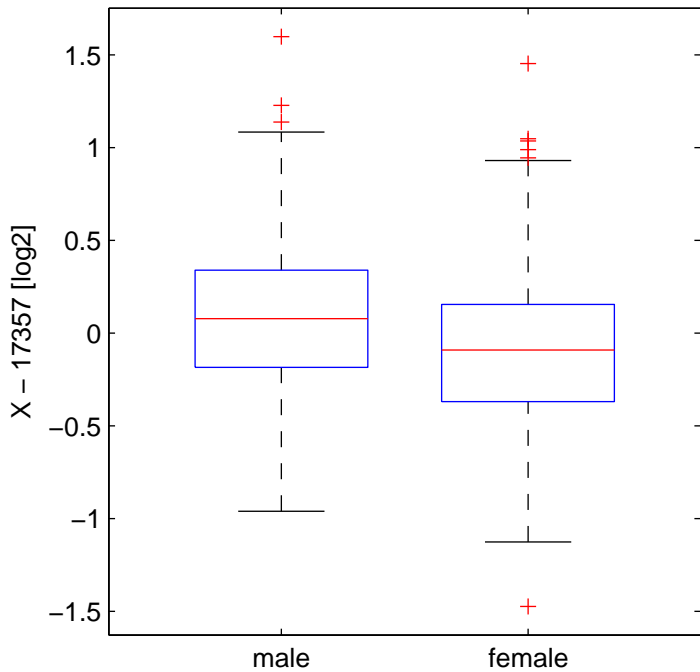



p-val: 5.23e-002

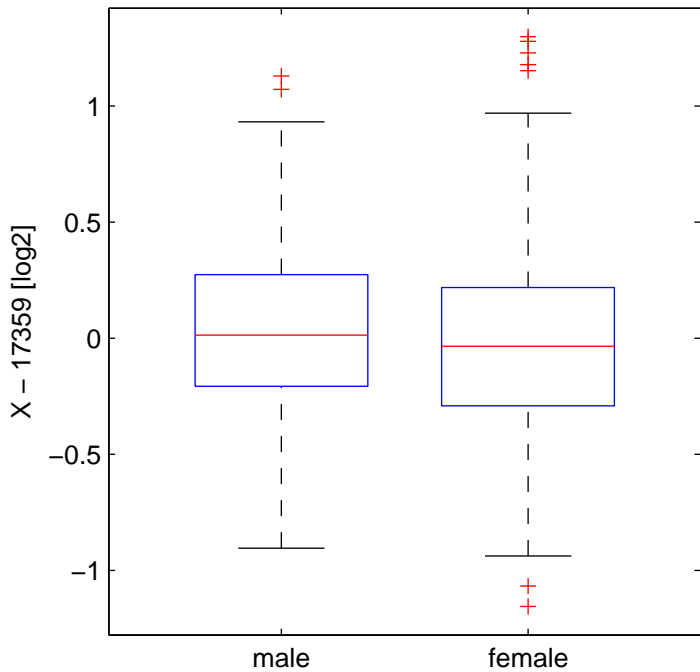

p-val: 3.28e-003

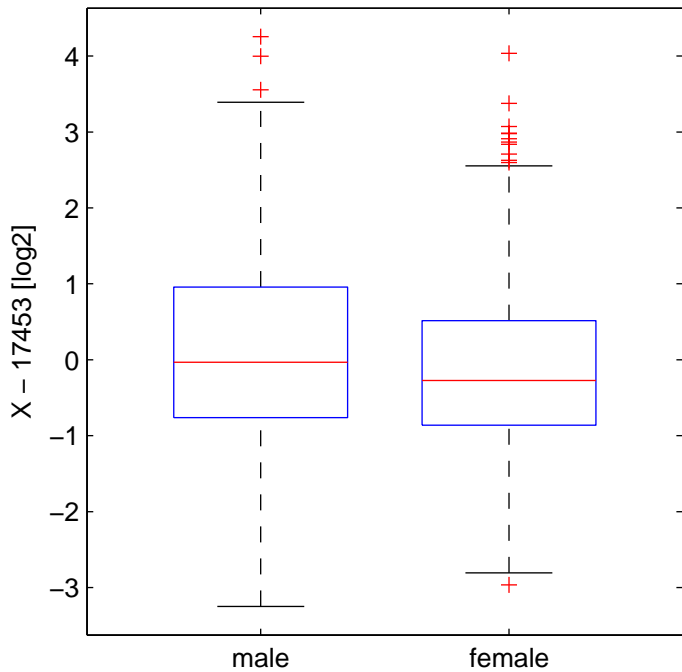

p-val: 4.58e-003

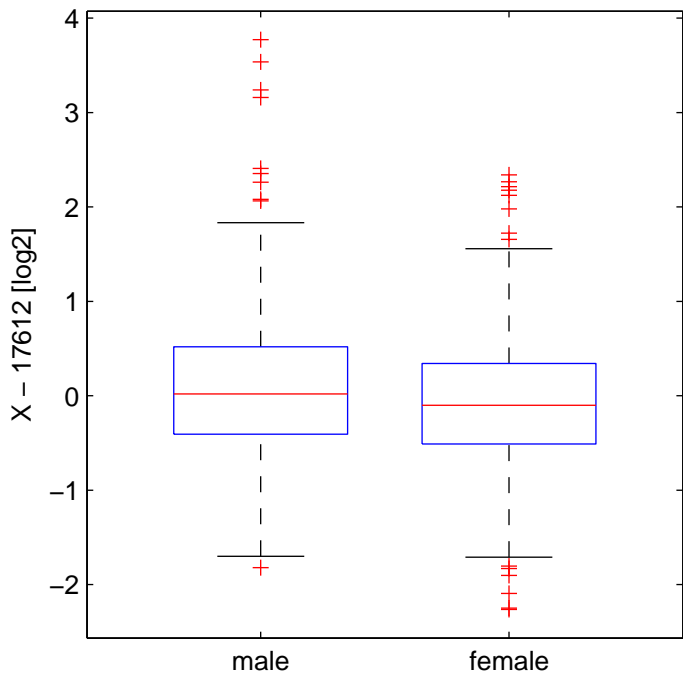

p-val: 4.22e-001

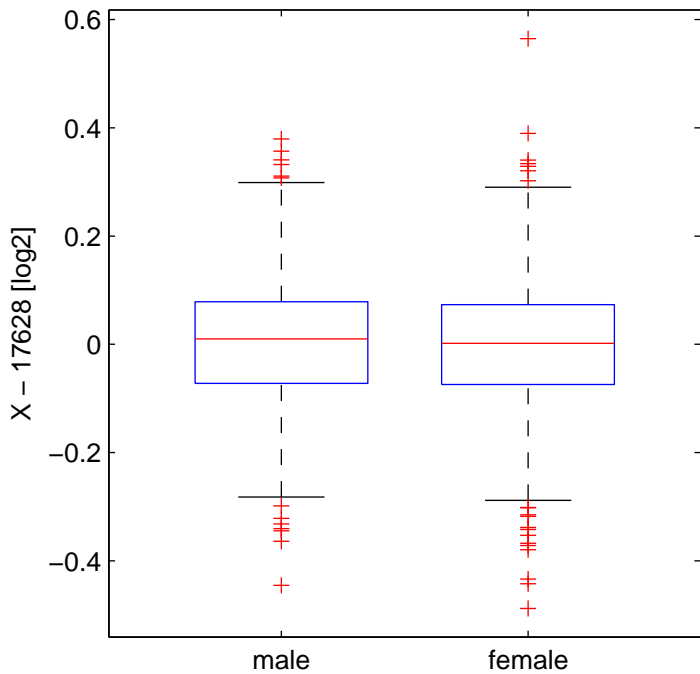



p-val: 1.12e-001

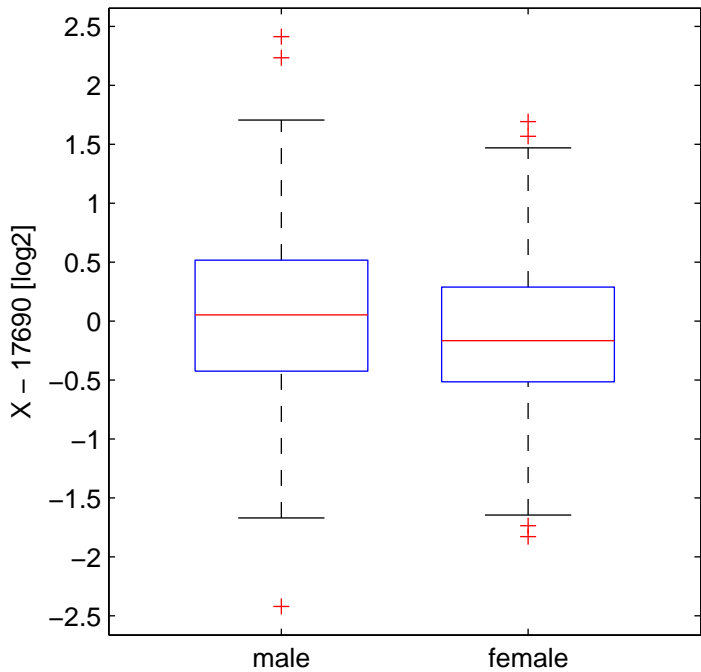

p-val: 1.50e-009

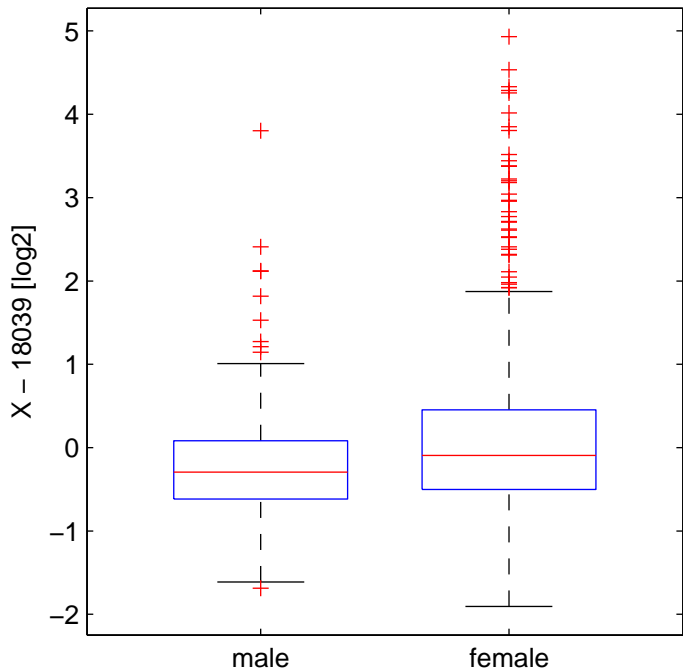

p-val: 9.83e-002

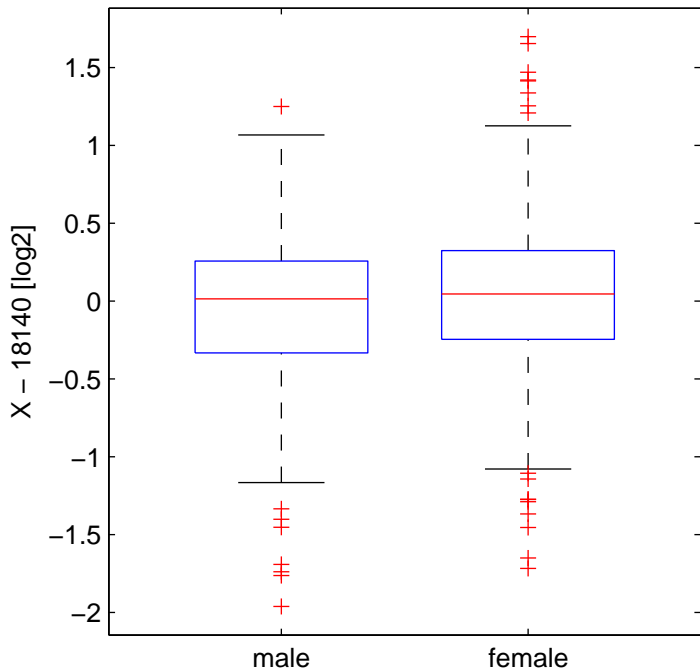



p-val: 5.99e-003

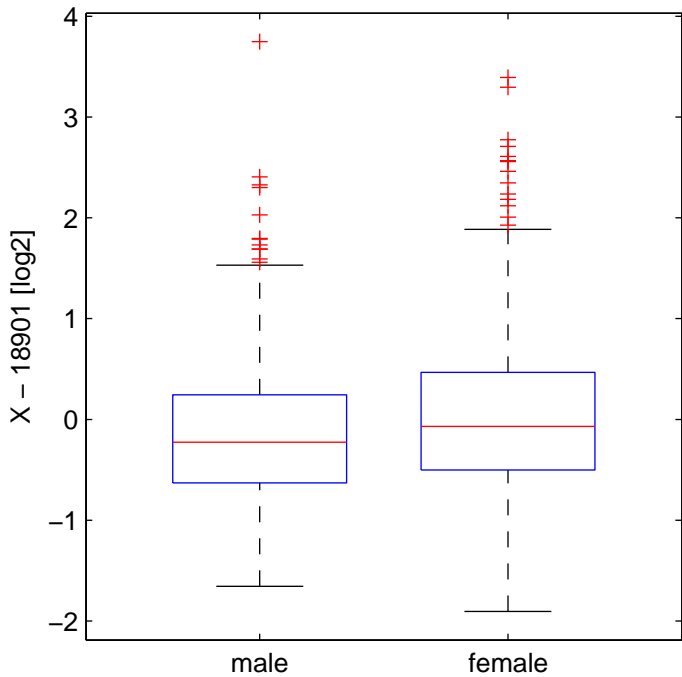

p-val: 5.10e-001

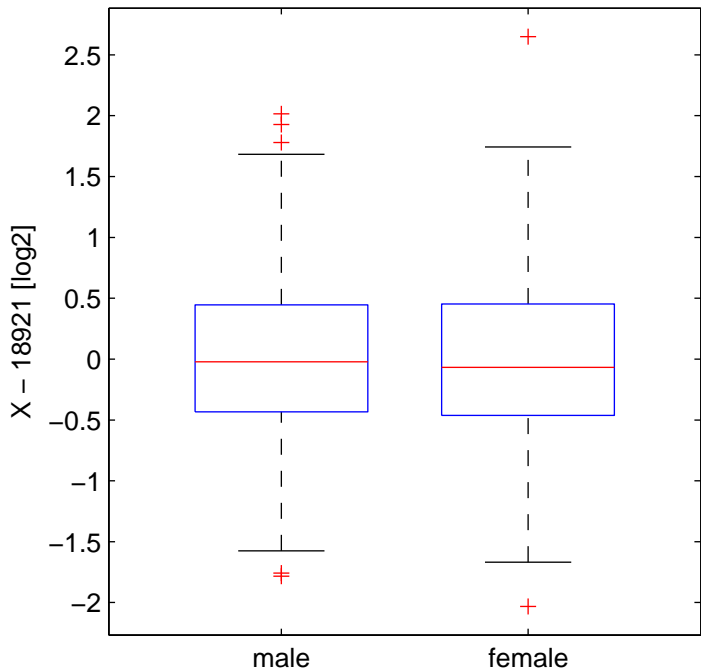

p-val: 3.86e-001

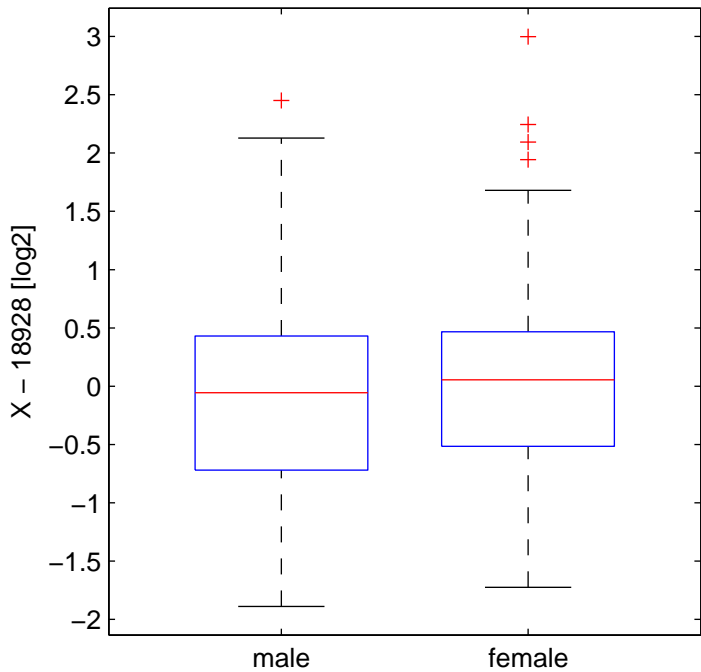

p-val:  $8.81e-016$

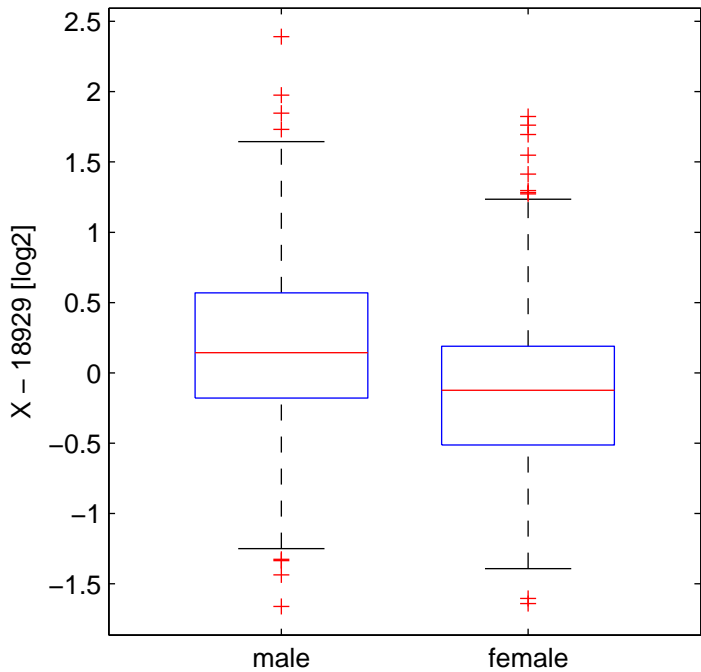

p-val: 4.18e-013

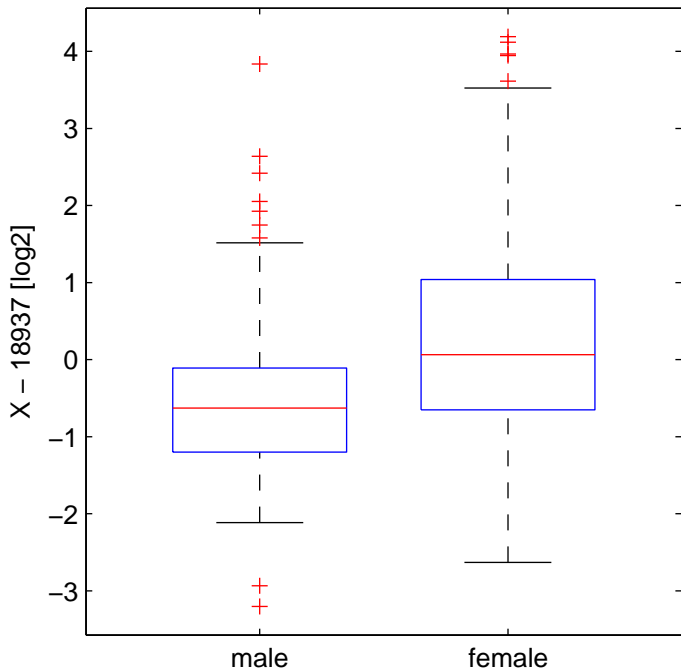

p-val: 2.10e-001

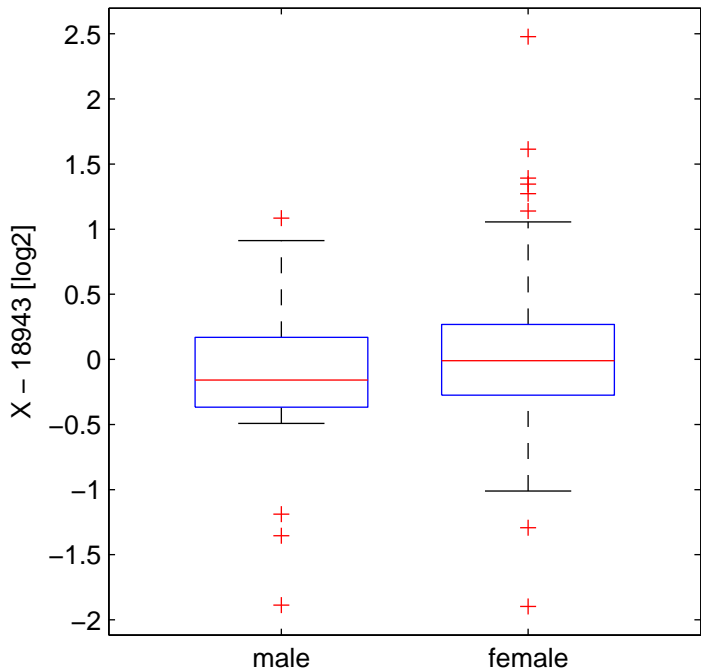

p-val: 4.34e-001

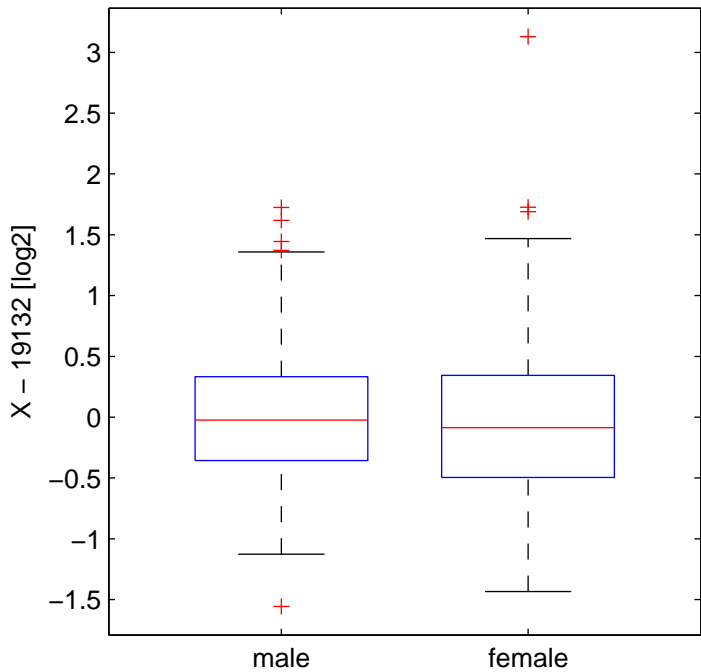

p-val: 1.89e-002

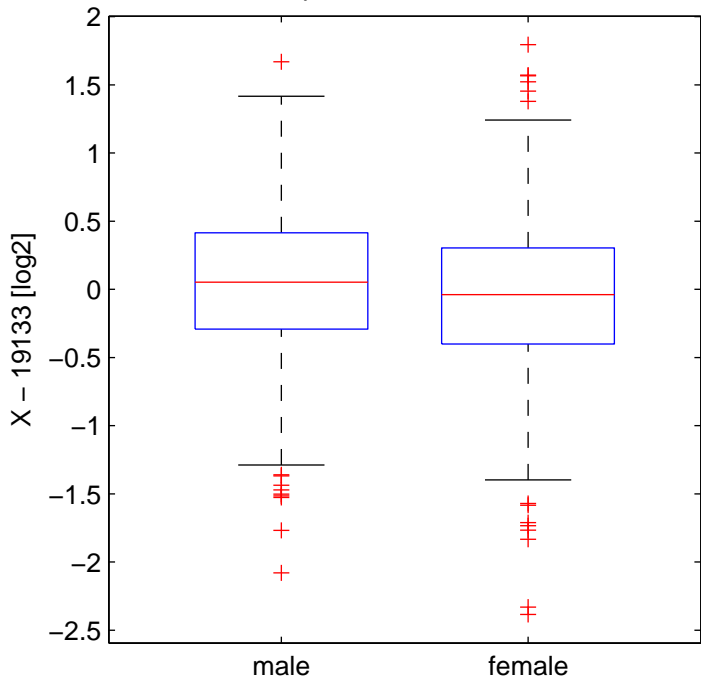



p-val: 2.17e-001

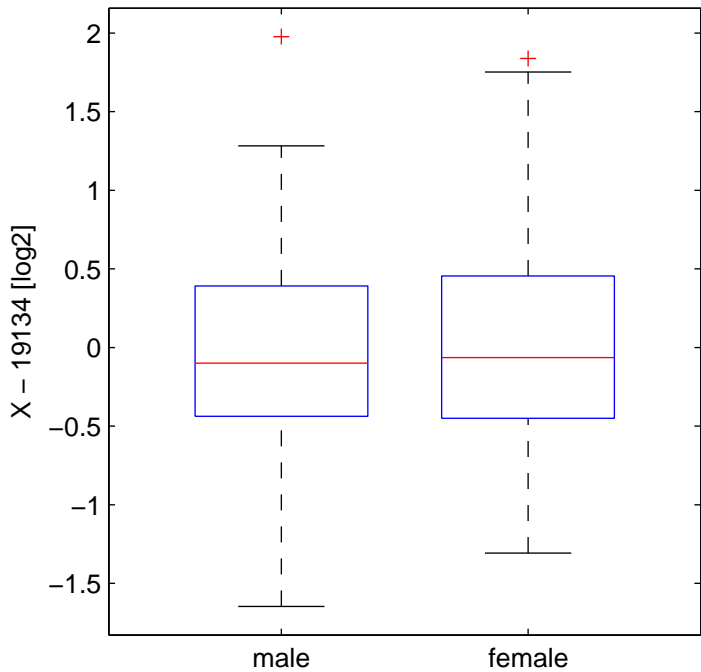

p-val: 1.32e-001

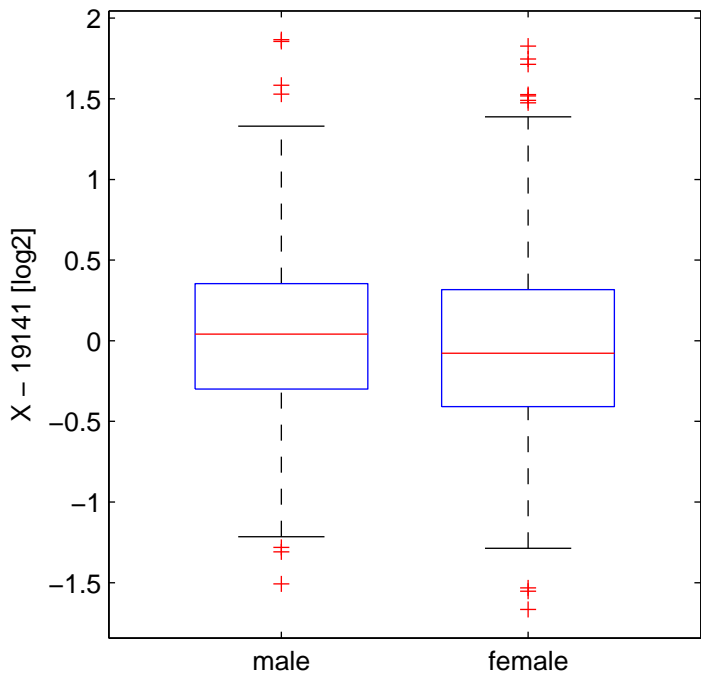

p-val: 7.41e-002

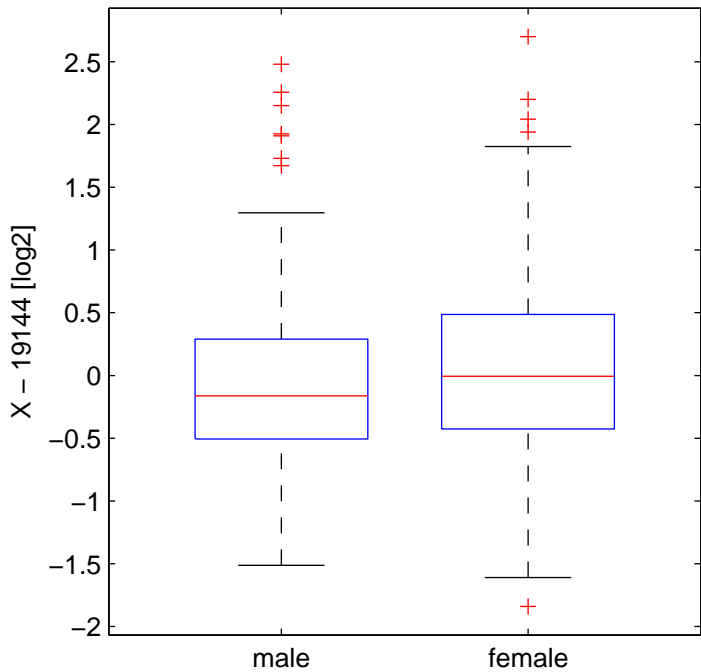

p-val: 4.83e-001

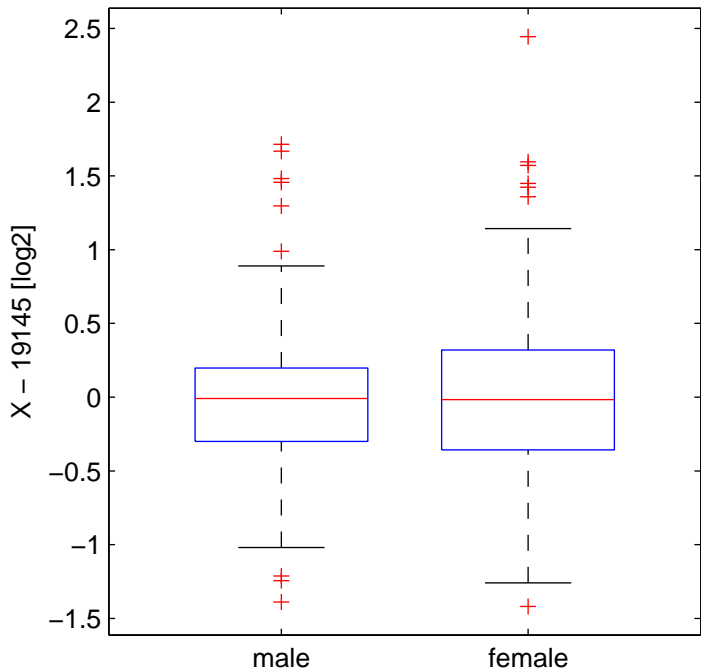

p-val: 2.49e-003

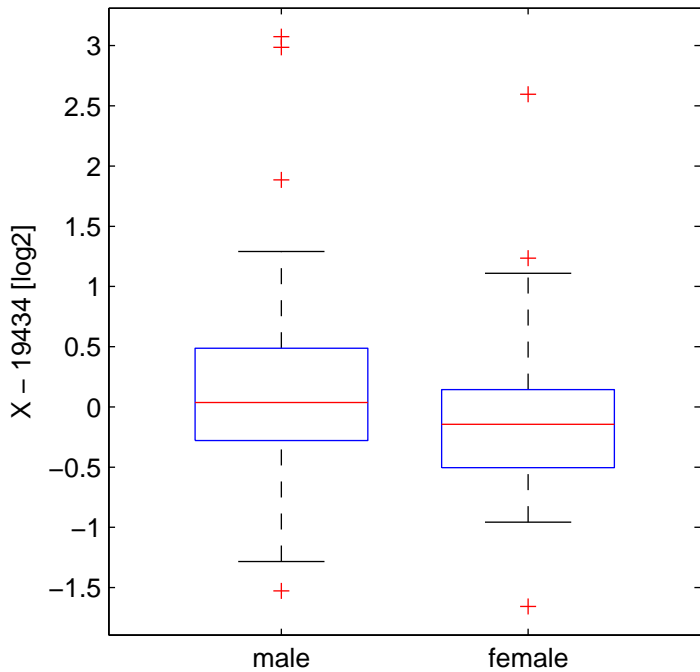

p-val: 5.89e-003

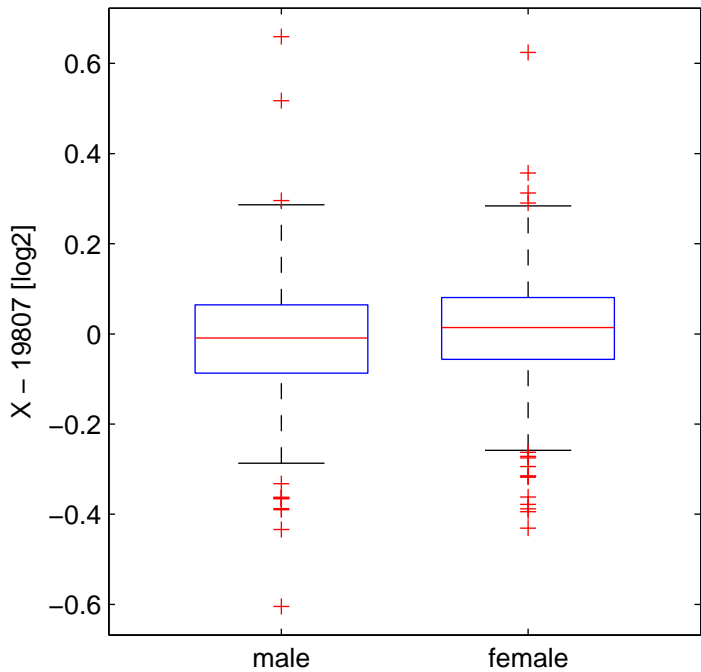

p-val: 7.39e-002

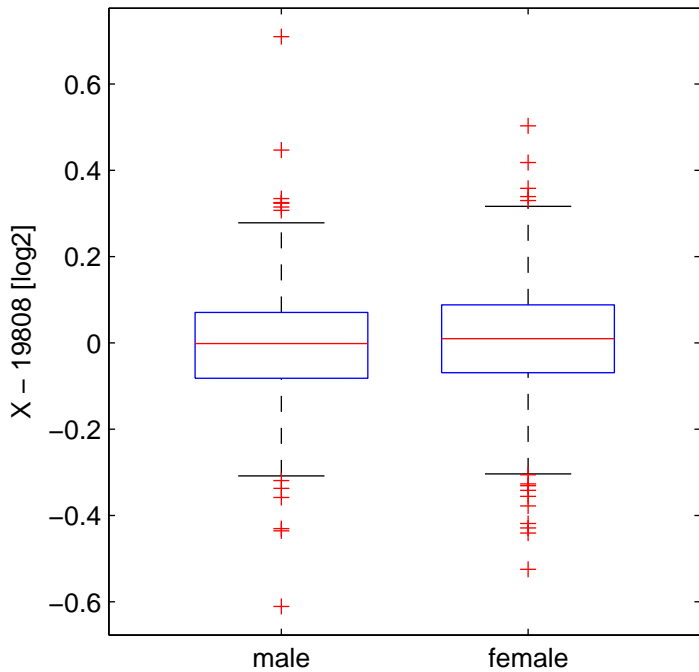

p-val: 9.90e-001

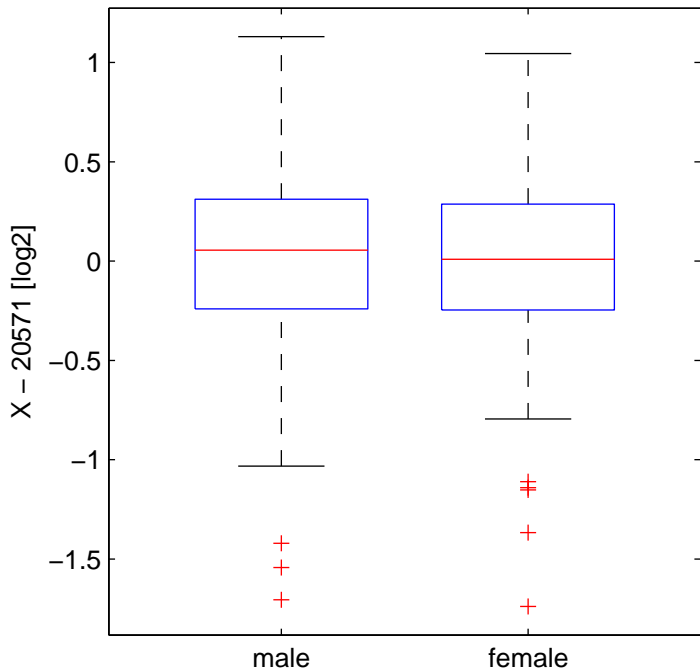



p-val: 6.77e-001

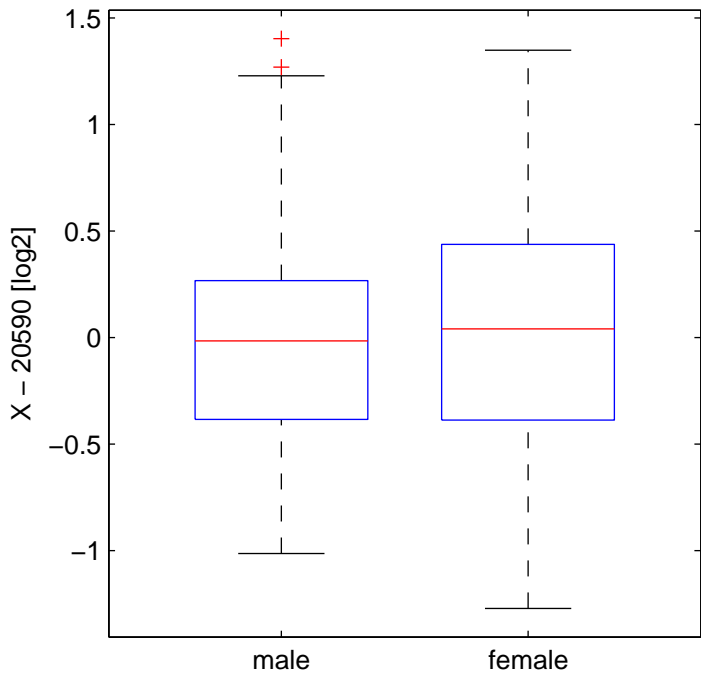

p-val: 8.73e-001

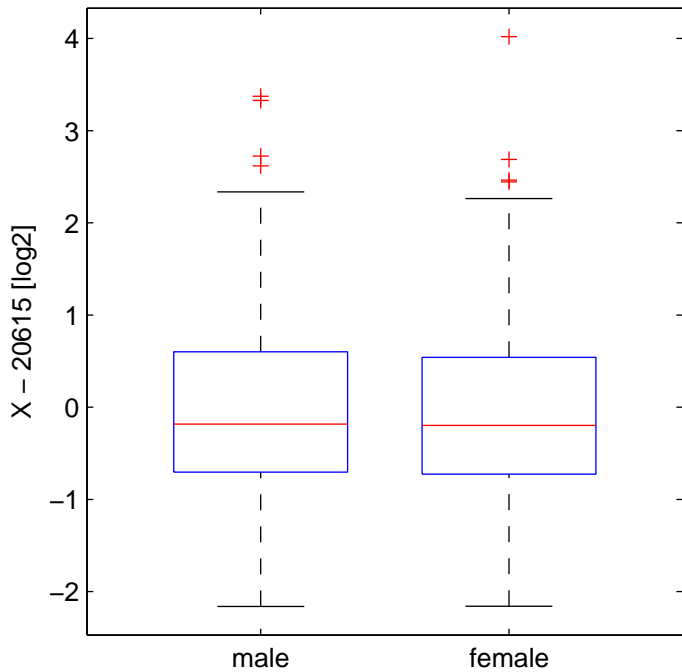

p-val: 8.90e-003

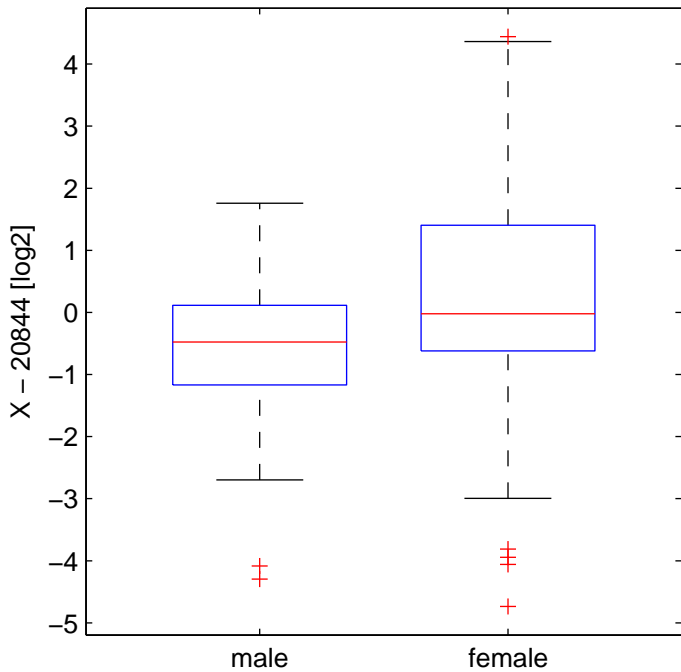

p-val: 1.08e-006

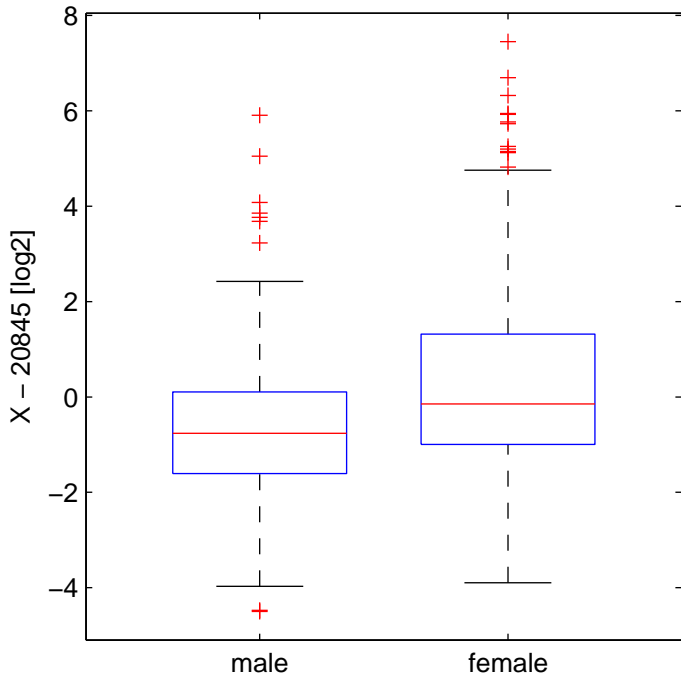

p-val: 2.73e-002

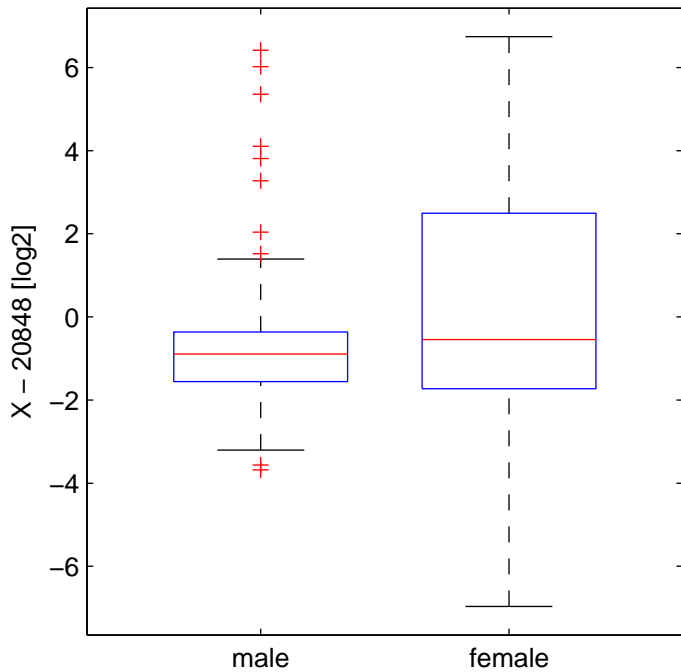

p-val: 6.61e-002

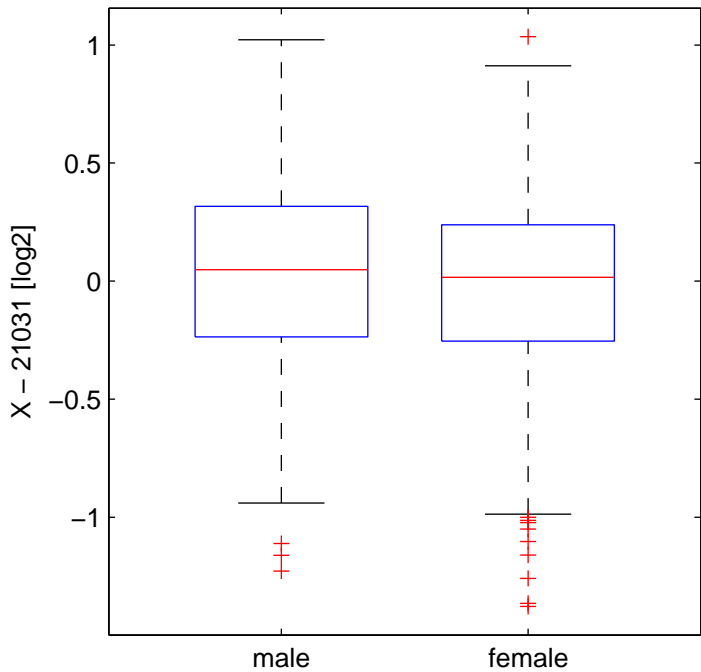

p-val: 6.53e-002

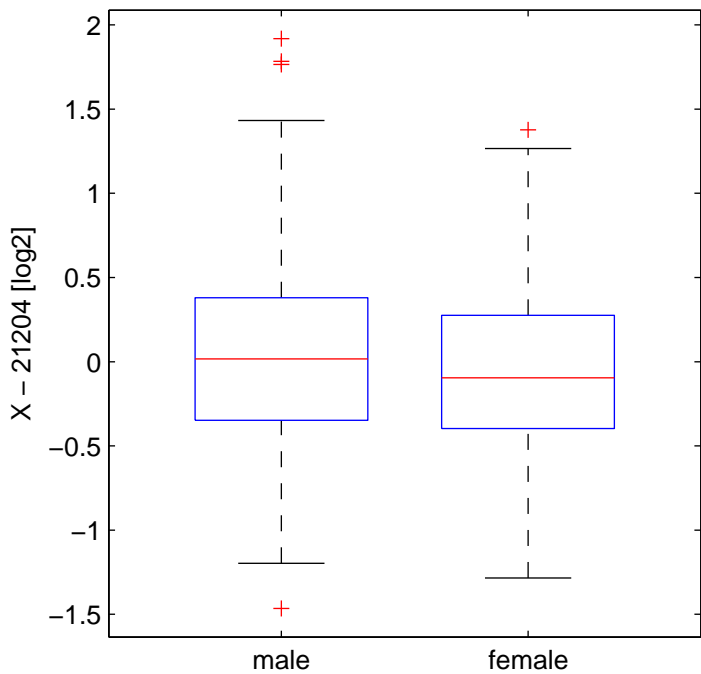

p-val: 2.46e-001

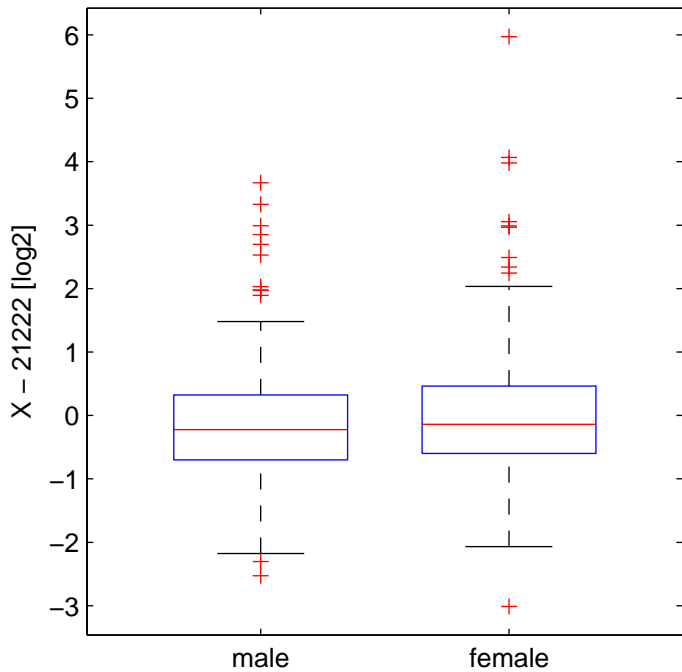



## SHIP pathway boxplots

p-val: 3.37e-006

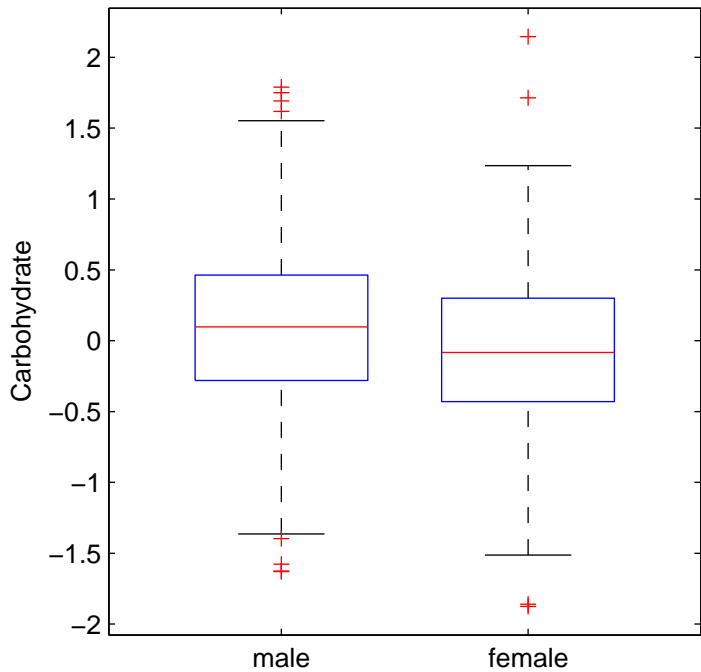

p-val: 6.91e-001

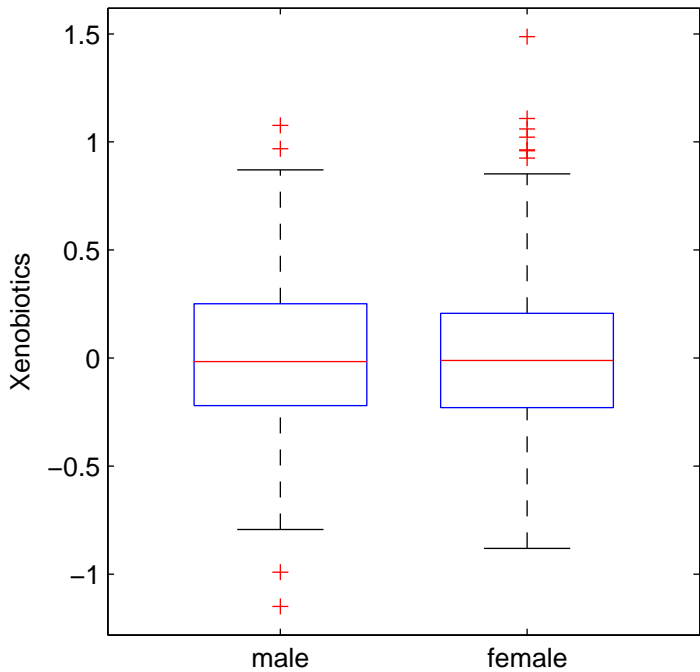

p-val: 1.25e-005

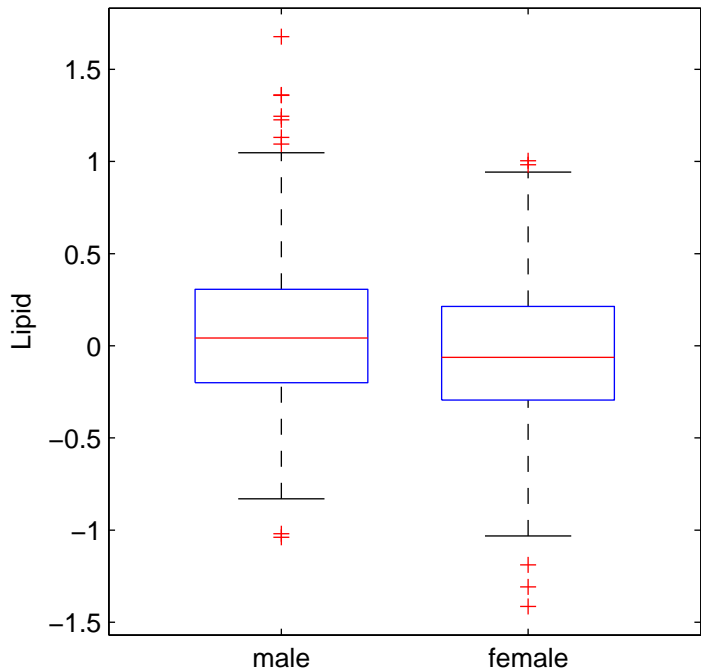

p-val: 4.85e-047

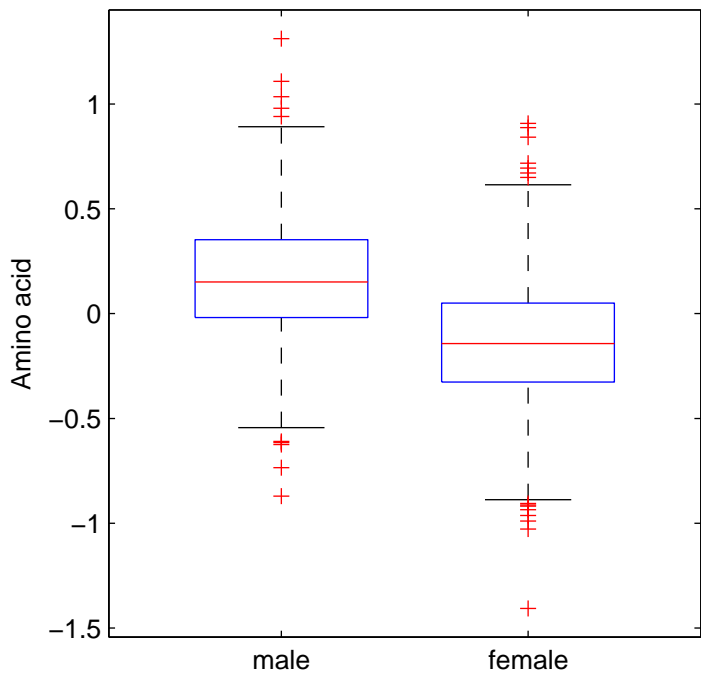

p-val: 1.14e-010

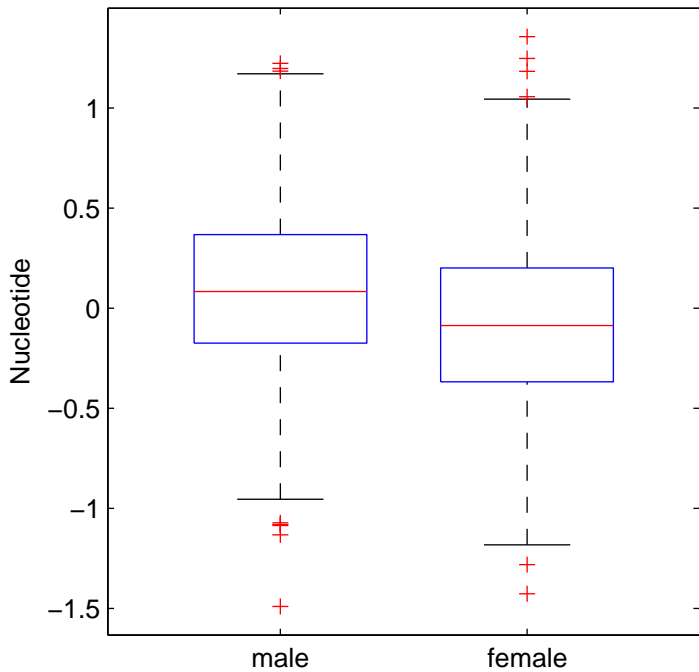

p-val: 1.38e-007

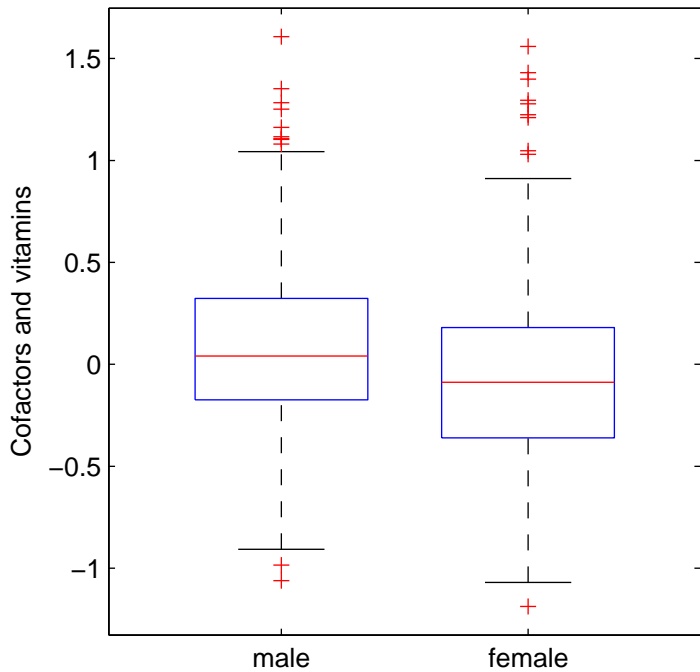

p-val: 6.12e-035

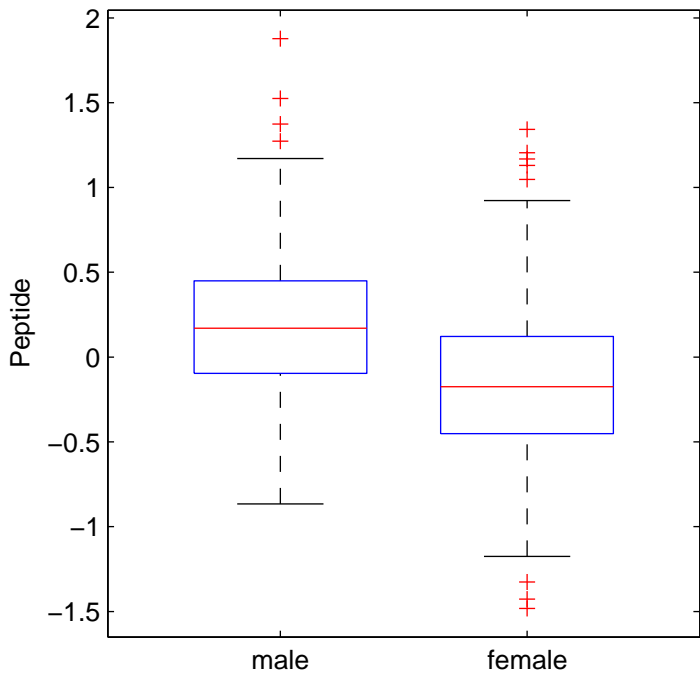



p-val: 6.91e-011

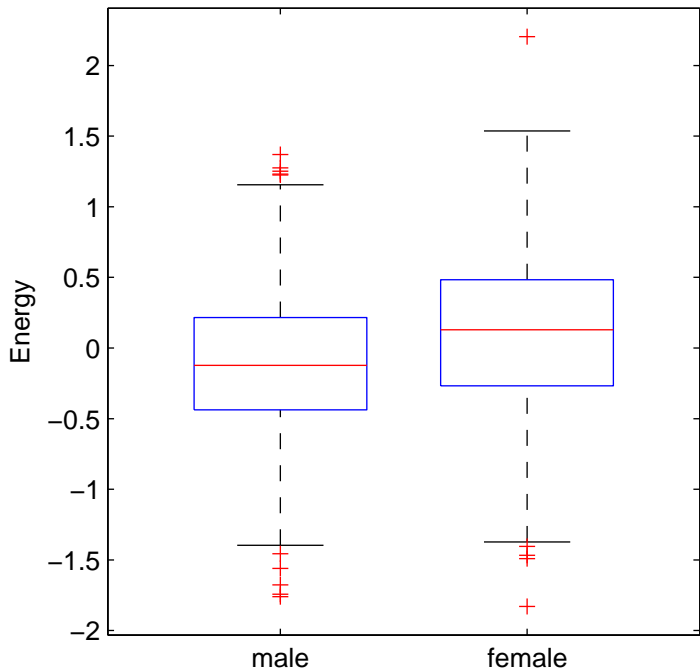

p-val:  $7.05e-019$

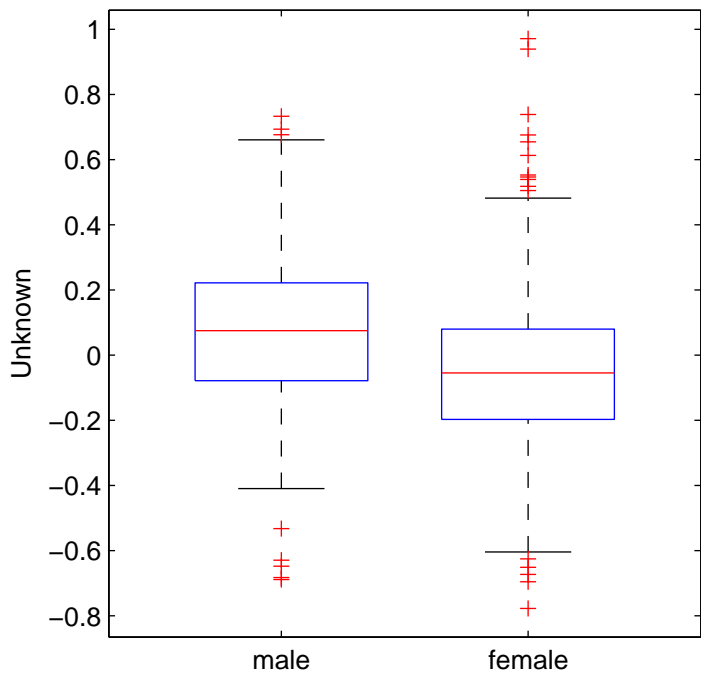

p-val: 2.73e-005

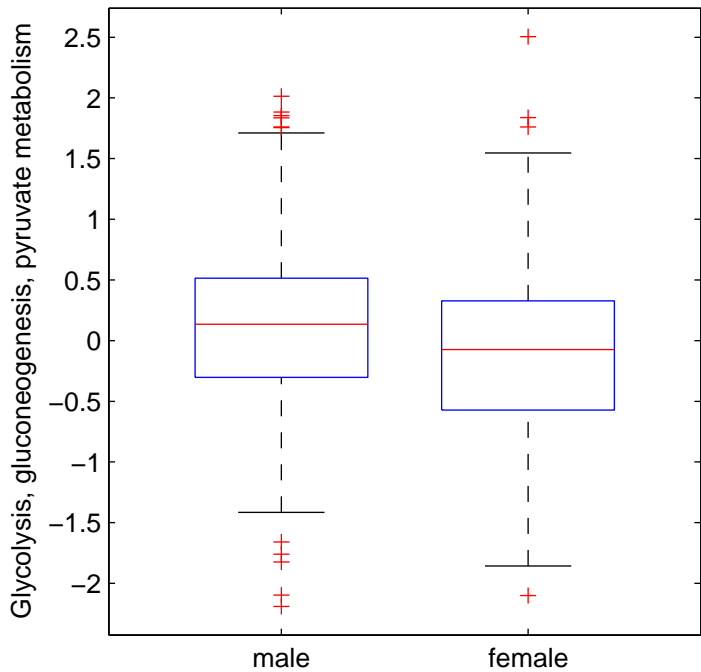

p-val: 3.32e-003

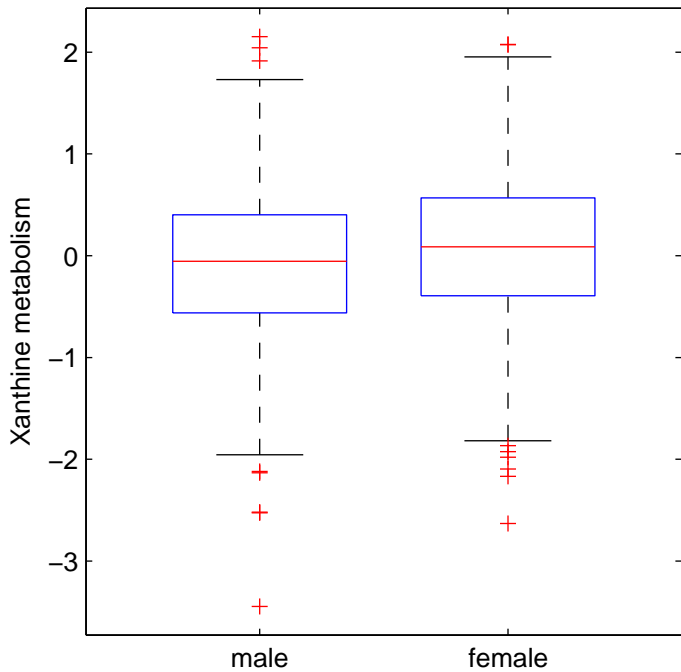

p-val: 2.96e-009

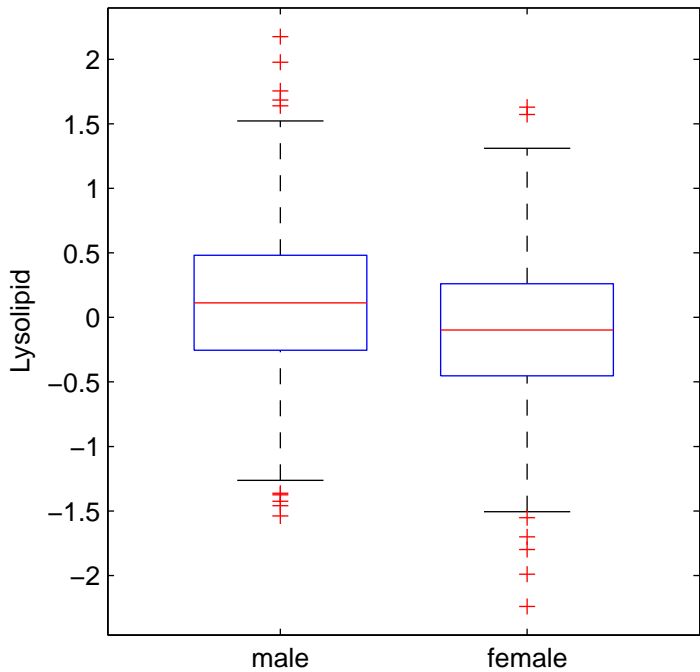

p-val: 1.35e-003

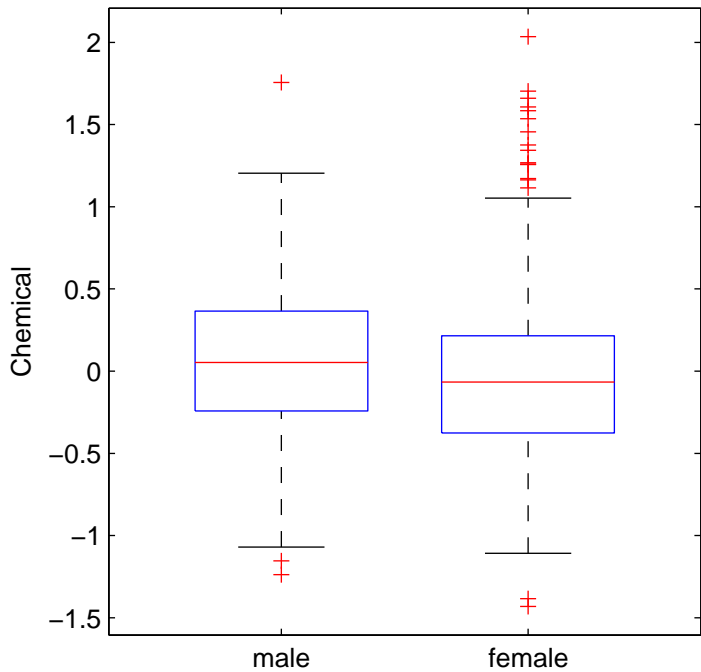

p-val: 4.00e-004

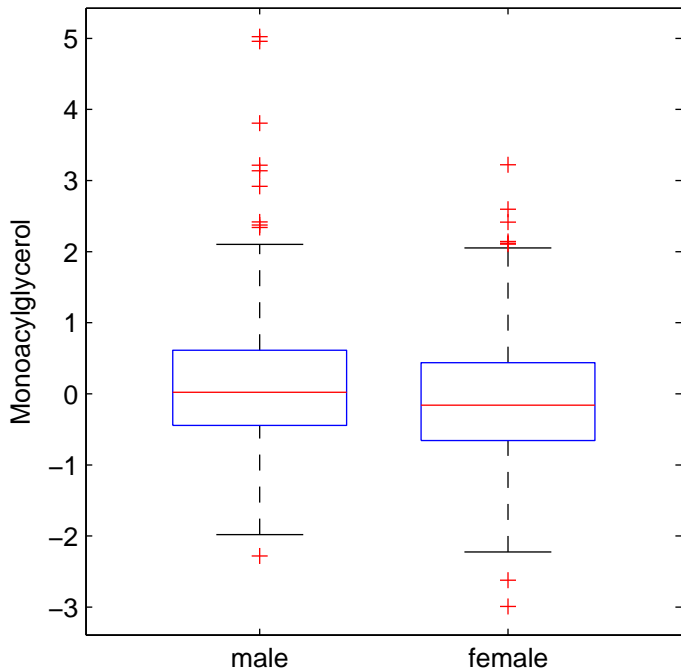

p-val: 4.13e-013

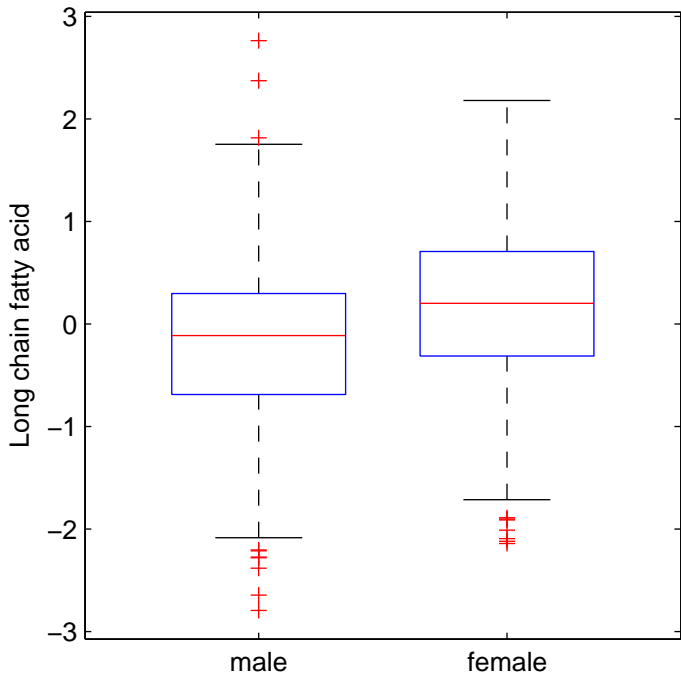



p-val: 4.38e-007

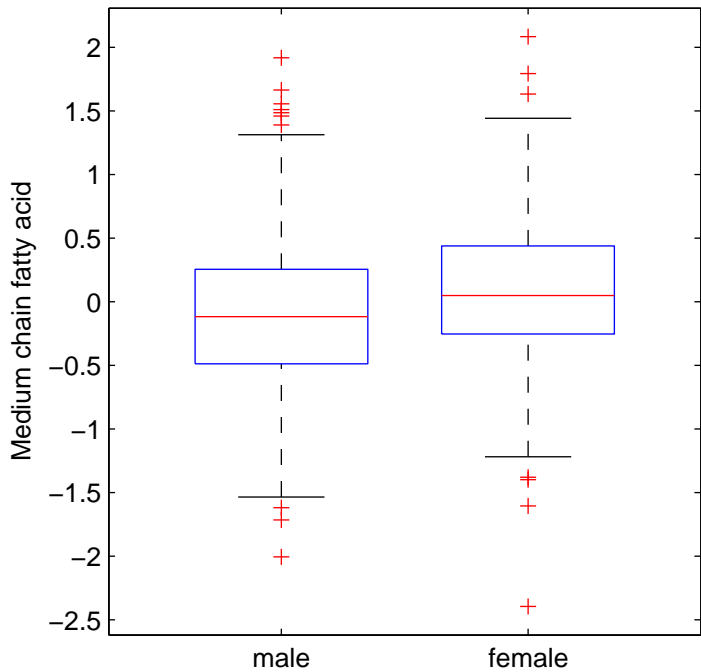

p-val: 4.08e-002

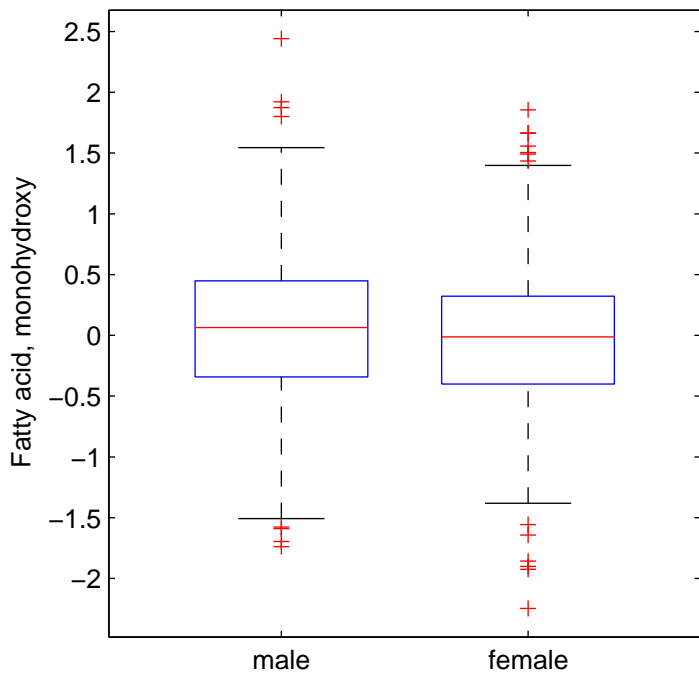

p-val: 2.91e-015

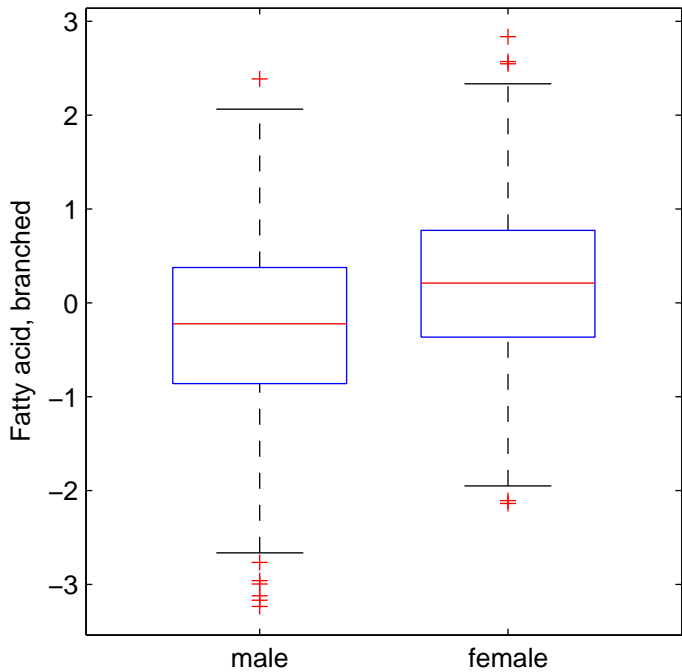

p-val: 1.38e-009

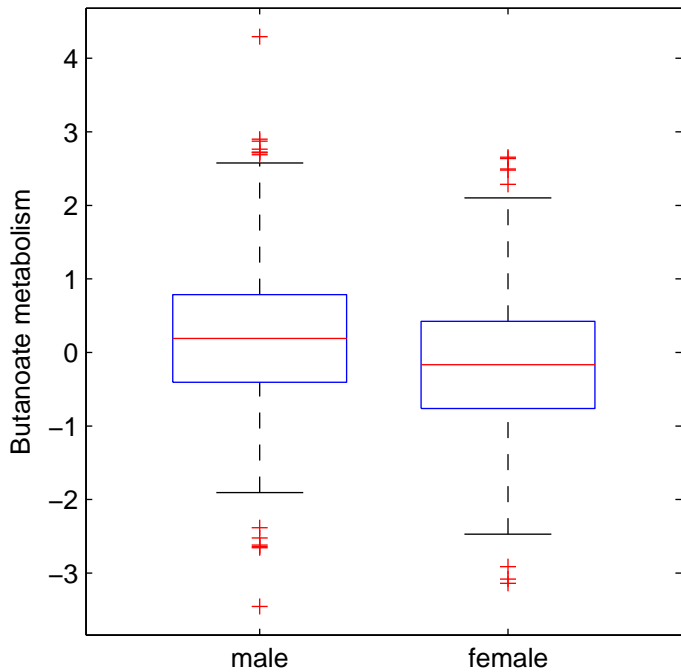

p-val: 1.57e-011

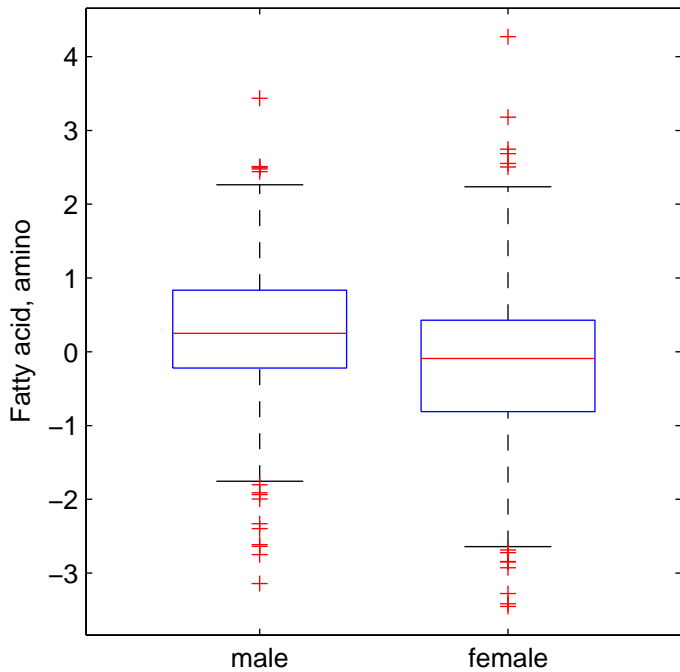

p-val: 1.26e-059

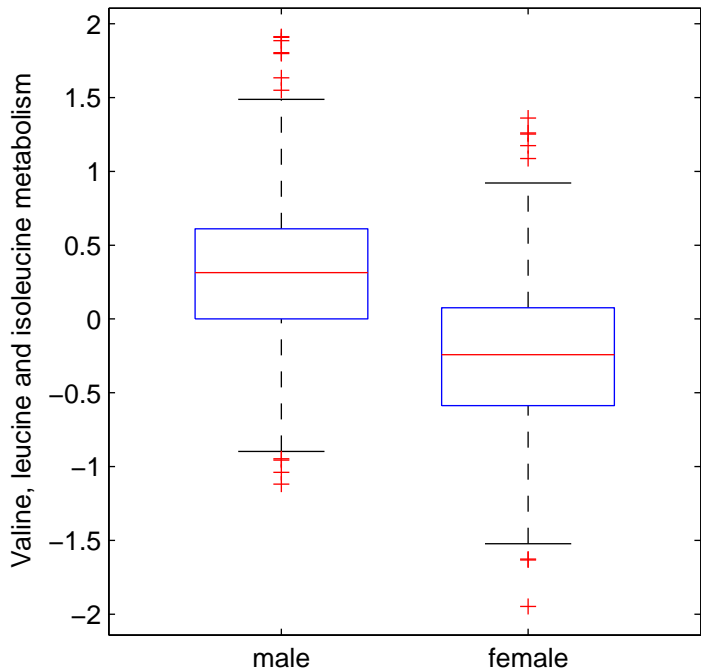

p-val: 1.85e-001

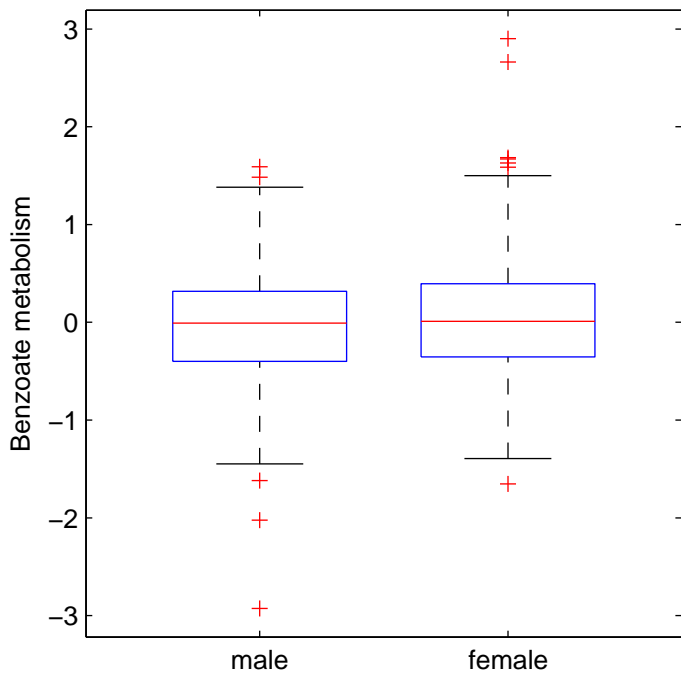

p-val: 2.81e-043

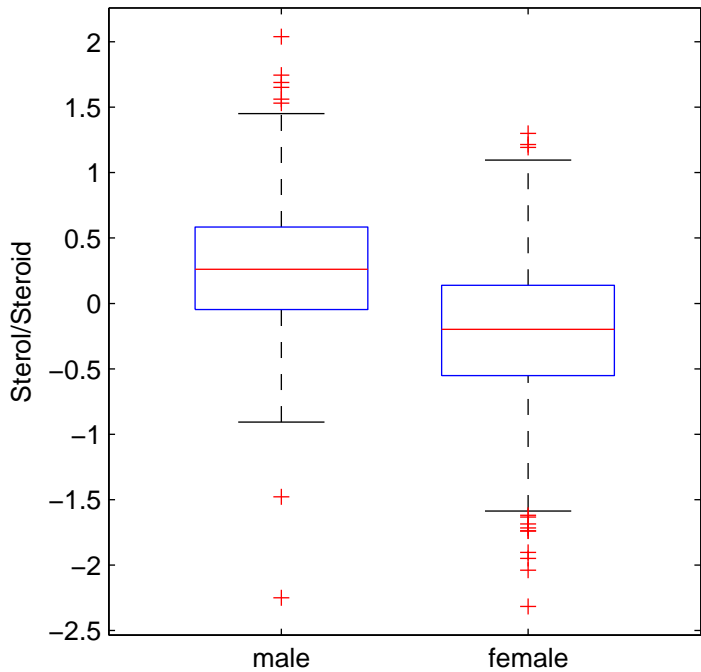



p-val: 2.00e-009

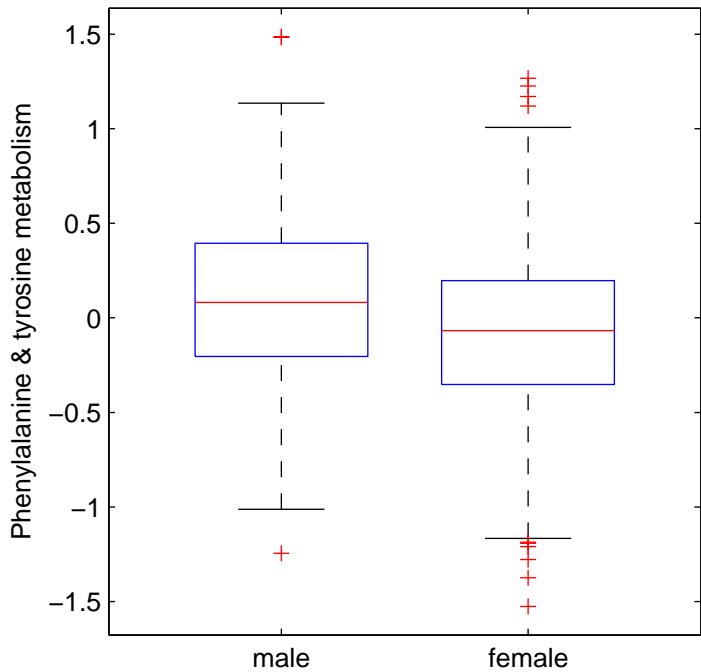

p-val: 7.88e-001

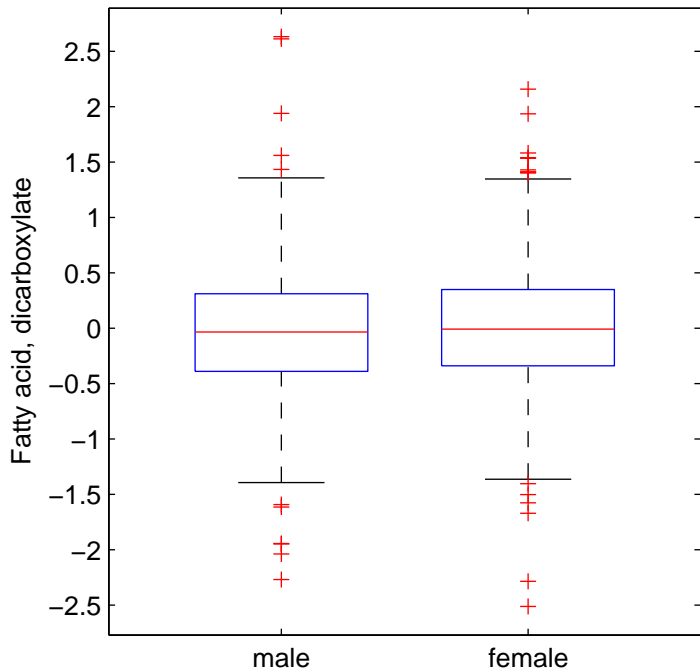

p-val: 2.01e-013

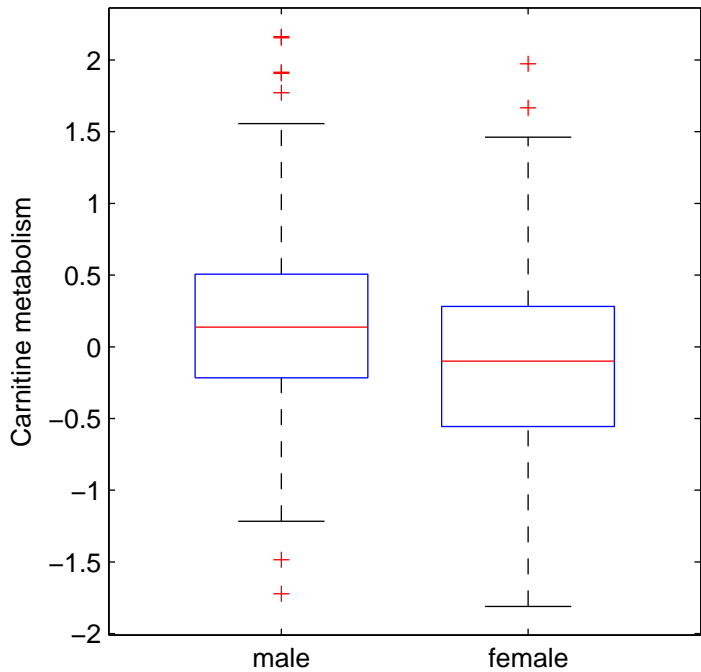

p-val: 2.31e-003

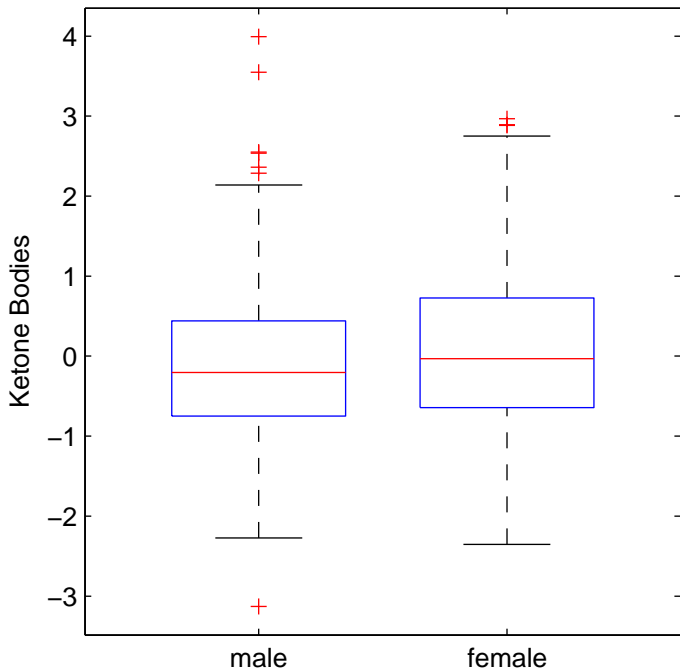

p-val: 1.69e-006

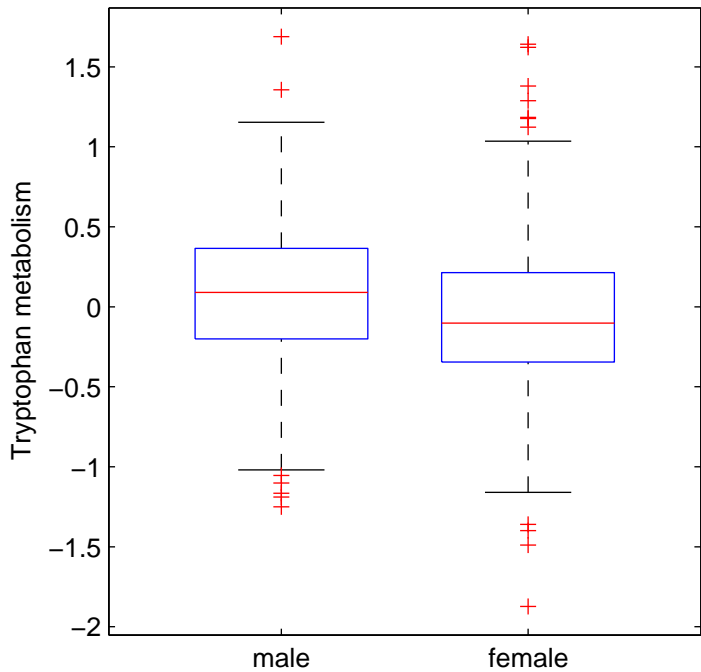

p-val: 5.04e-001

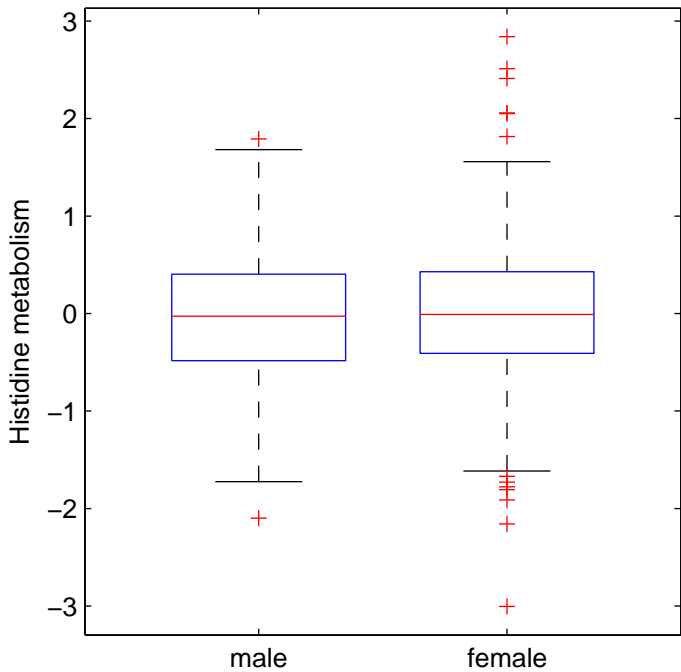

p-val: 1.88e-001

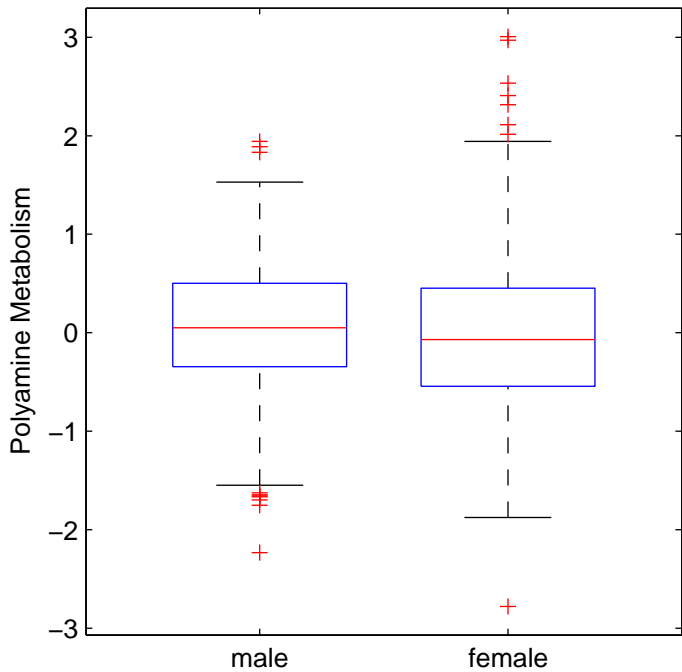

p-val: 9.97e-004

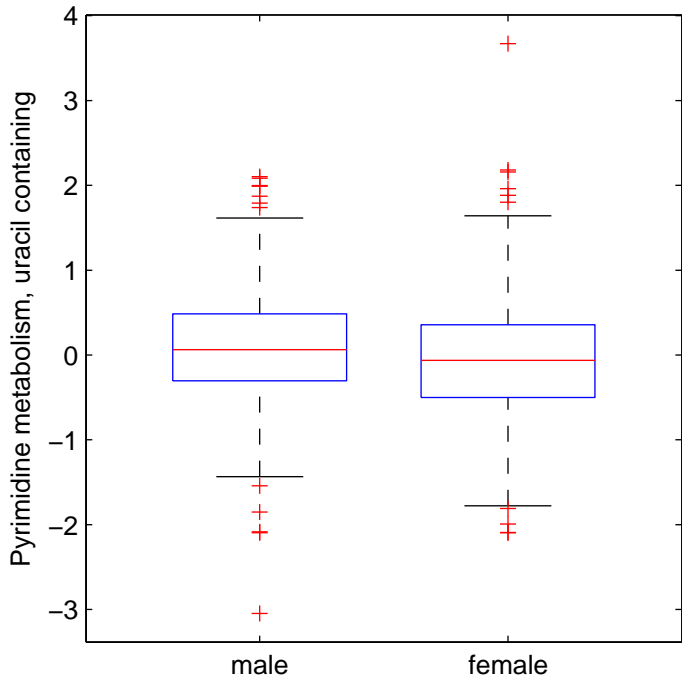



p-val: 6.49e-016

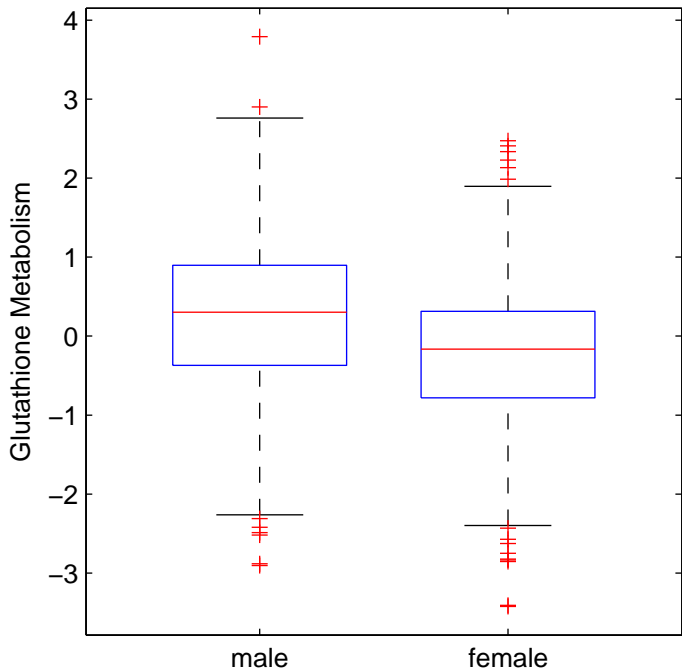

p-val: 9.76e-001

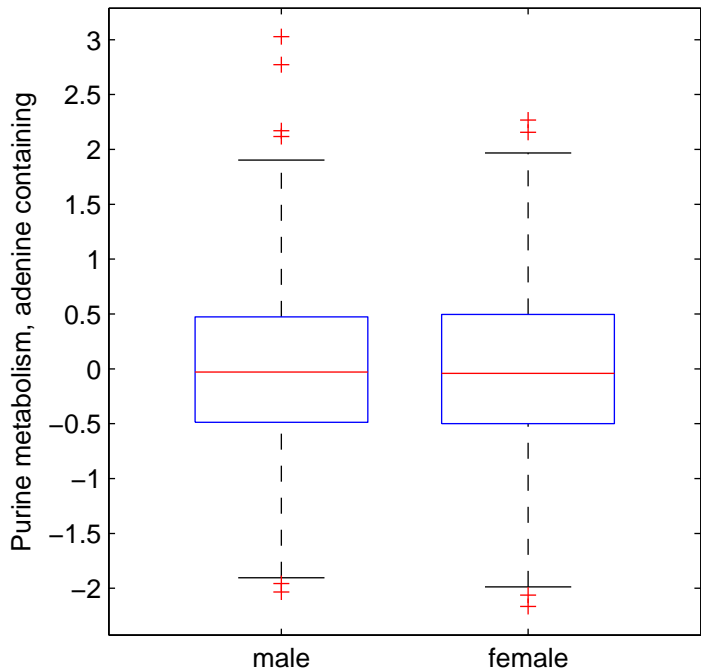

p-val: 6.11e-006

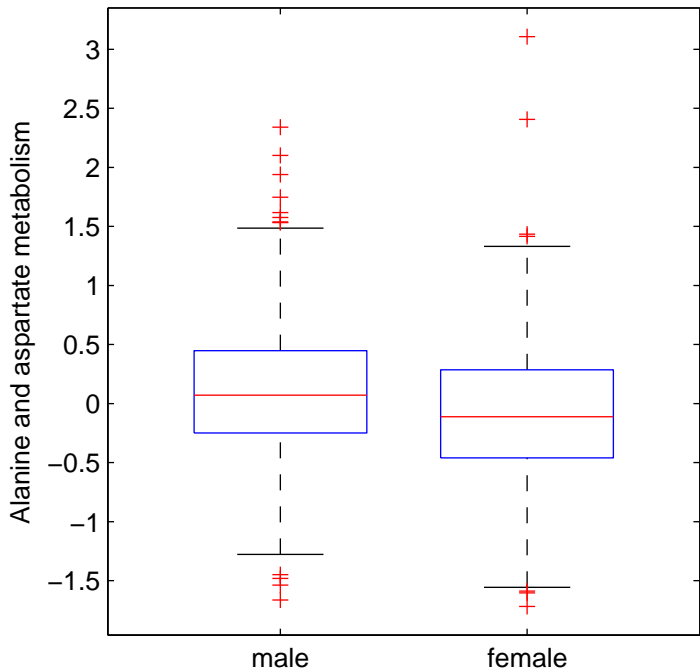

p-val: 1.52e-002

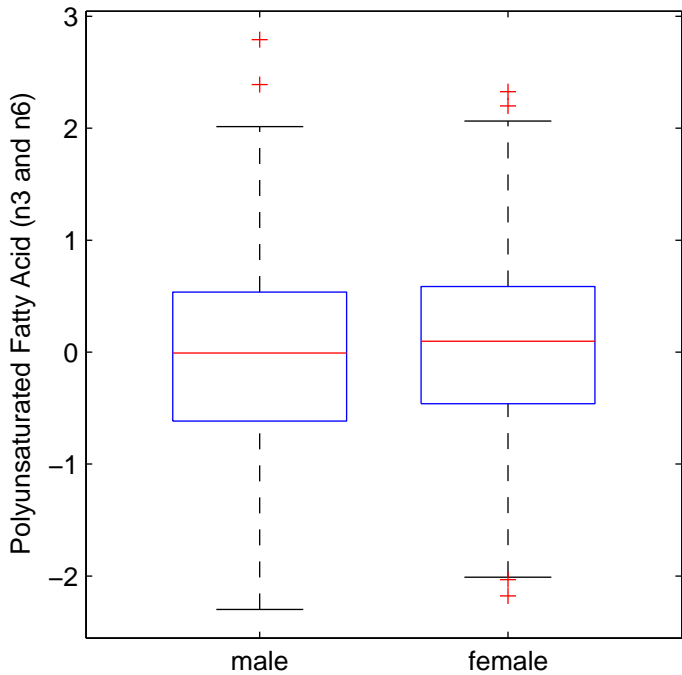

p-val: 1.18e-019

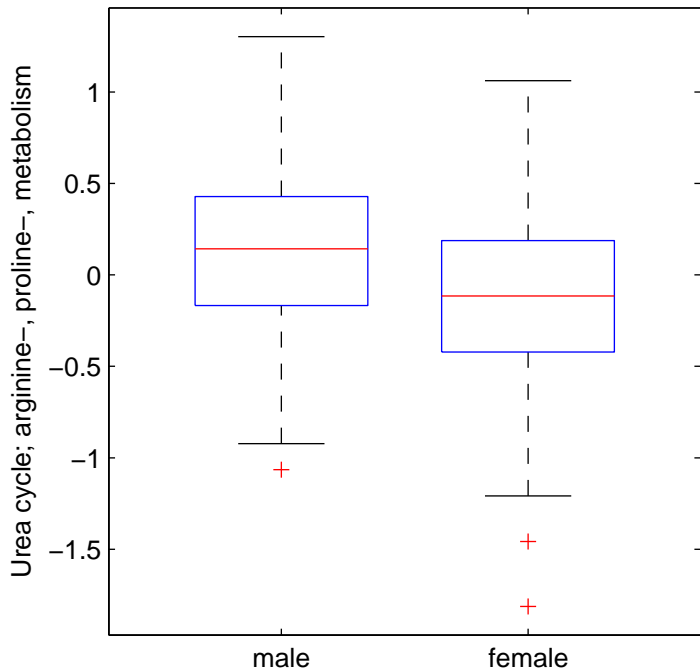

p-val: 1.13e-015

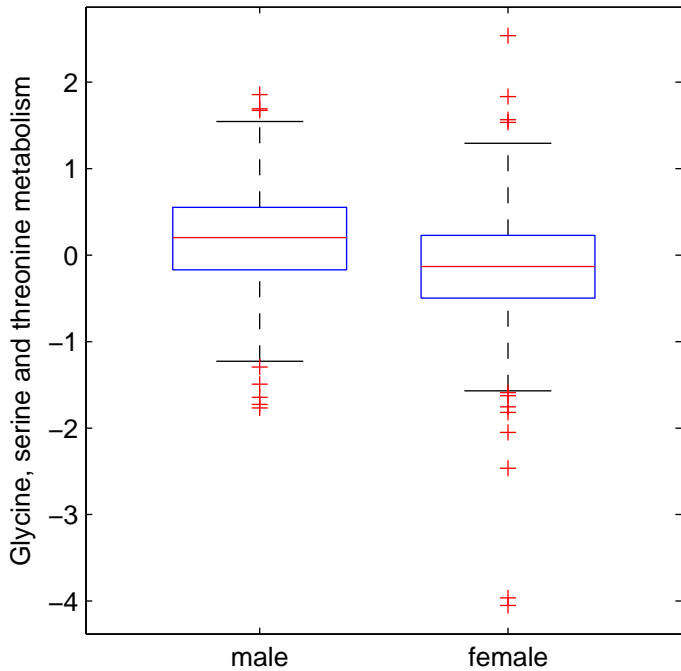

p-val: 2.93e-014

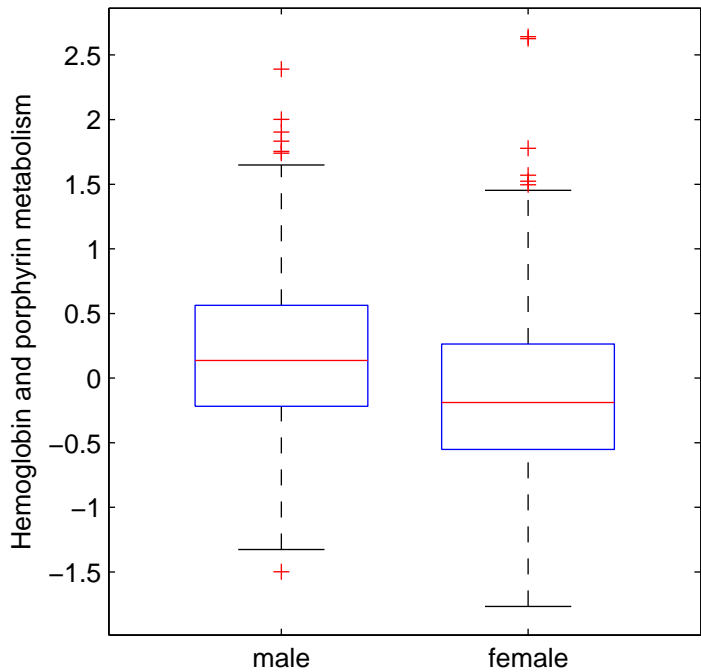

p-val: 2.88e-001

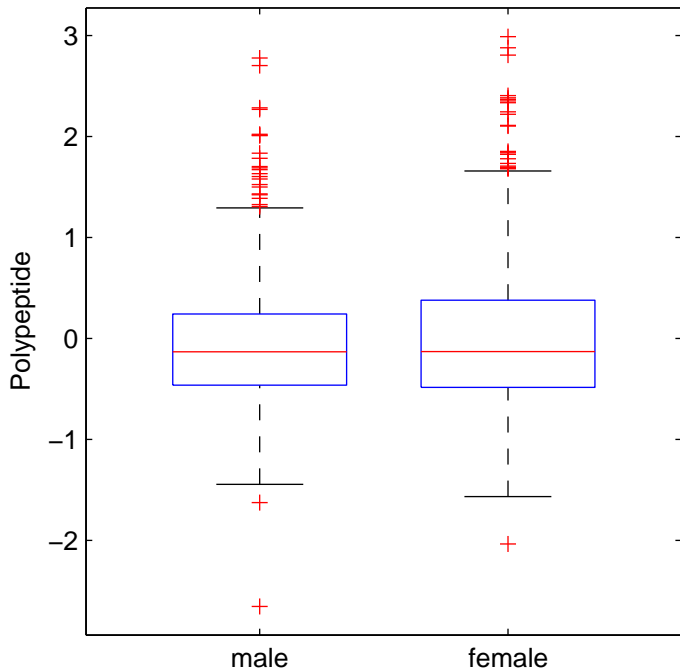



p-val: 6.61e-022

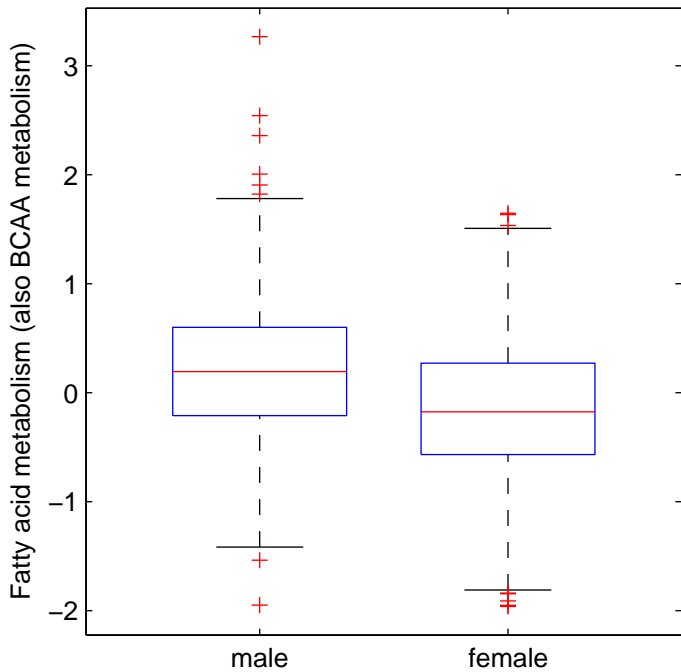

p-val: 5.28e-002

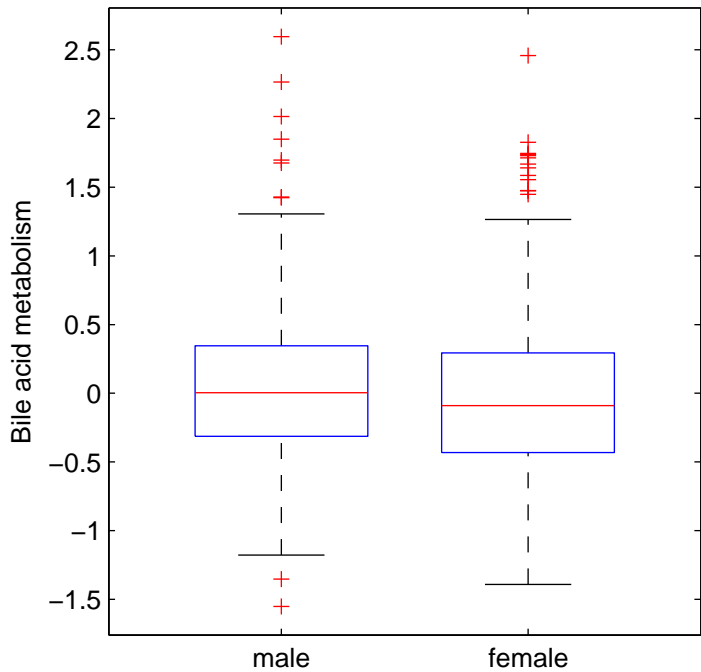

p-val: 4.03e-013

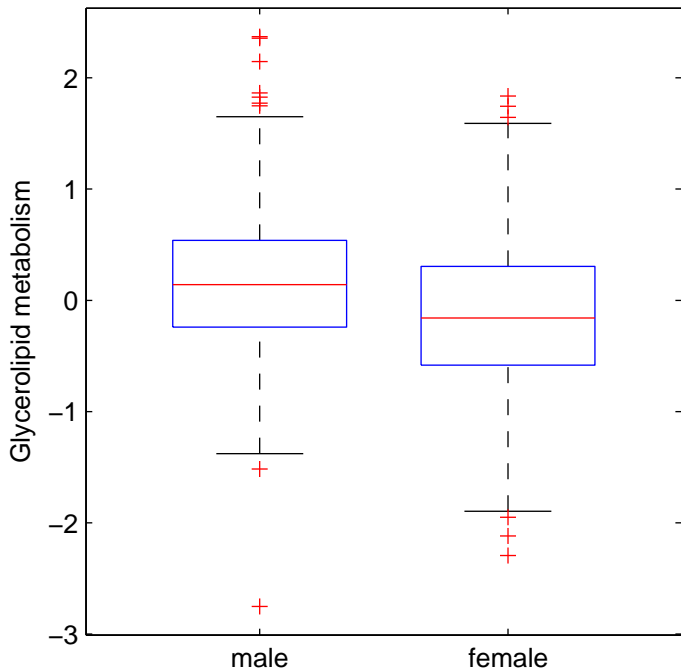

p-val: 7.61e-001

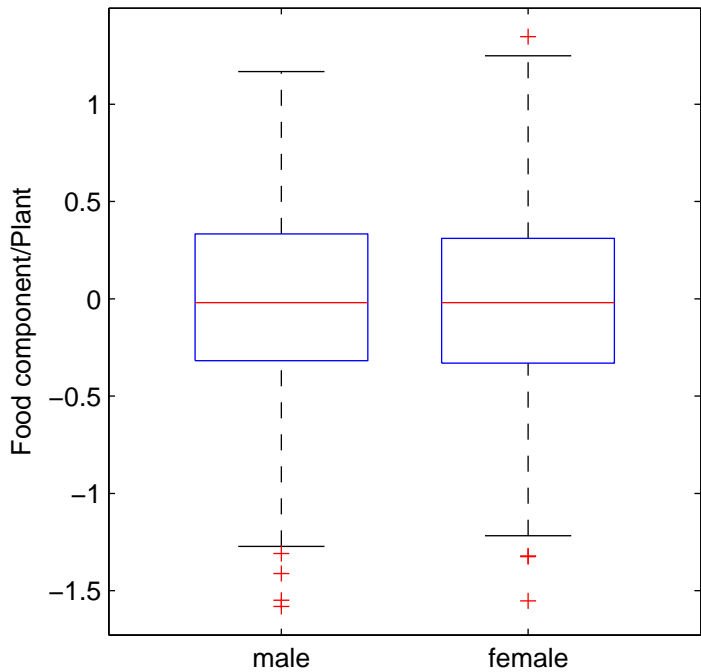

p-val: 4.06e-002

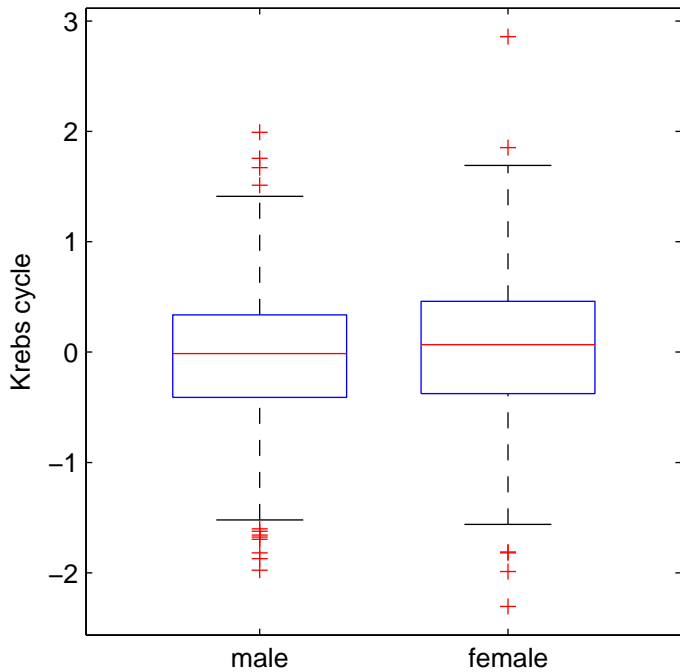

p-val: 1.93e-001

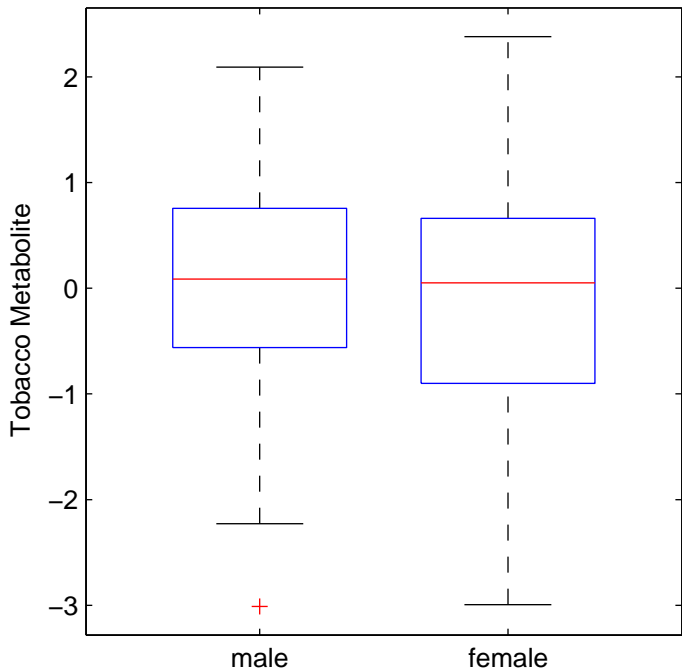

p-val: 2.62e-002

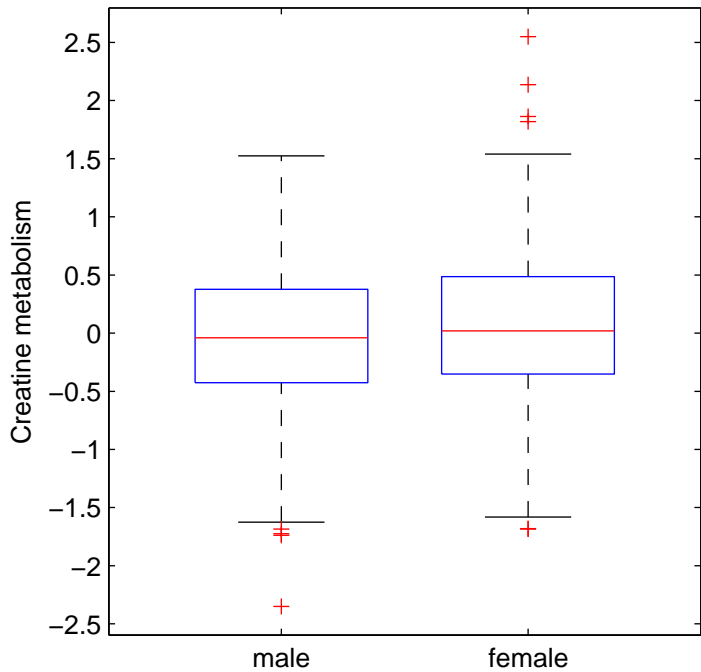

p-val: 9.16e-002

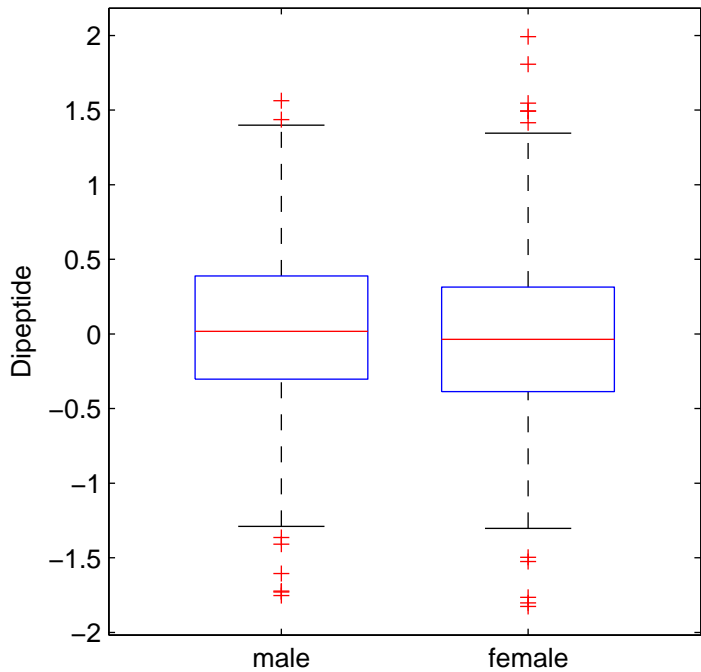



p-val: 2.58e-040

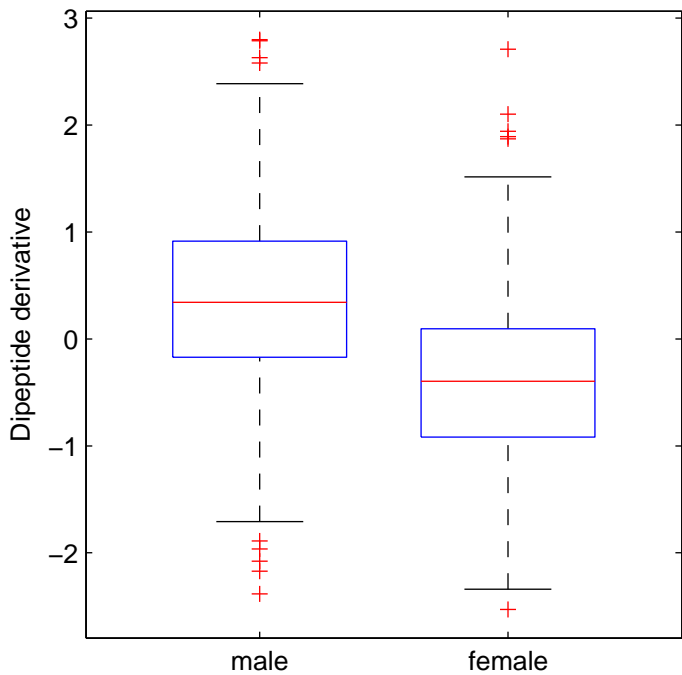

p-val: 1.51e-003

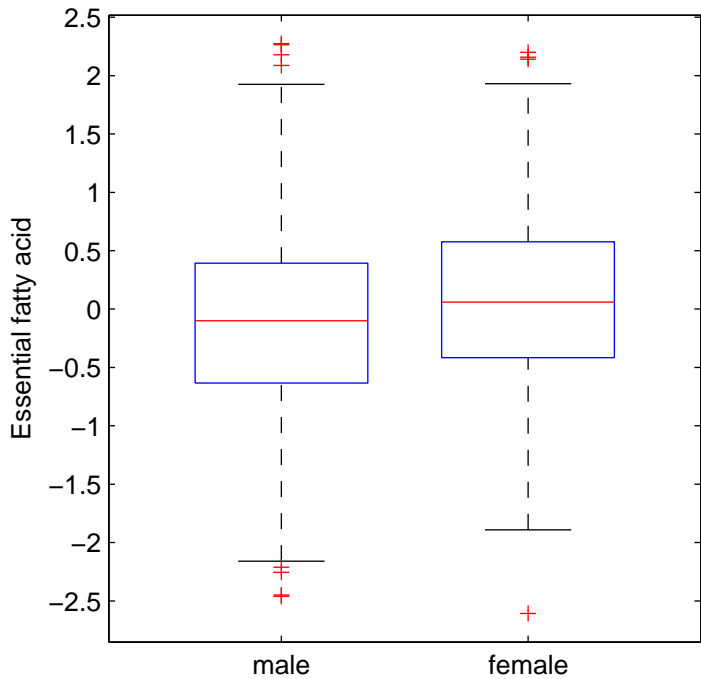

p-val: 4.46e-001

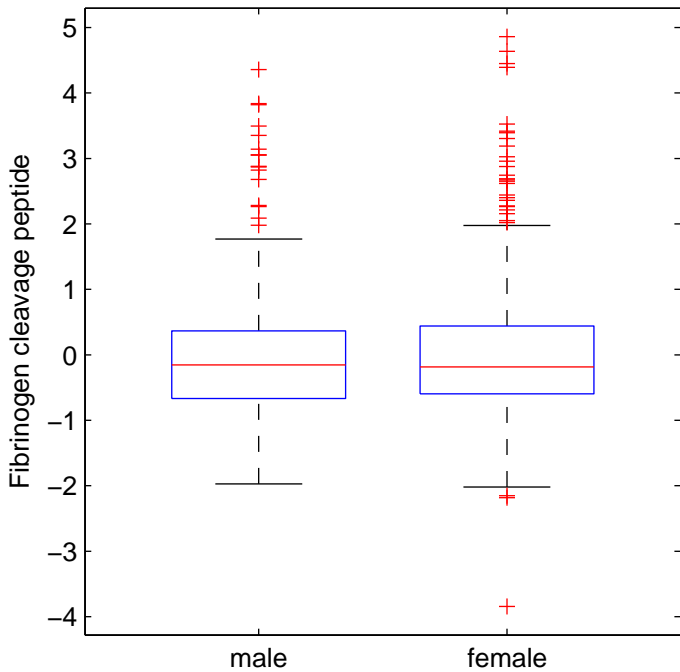

p-val: 6.30e-034

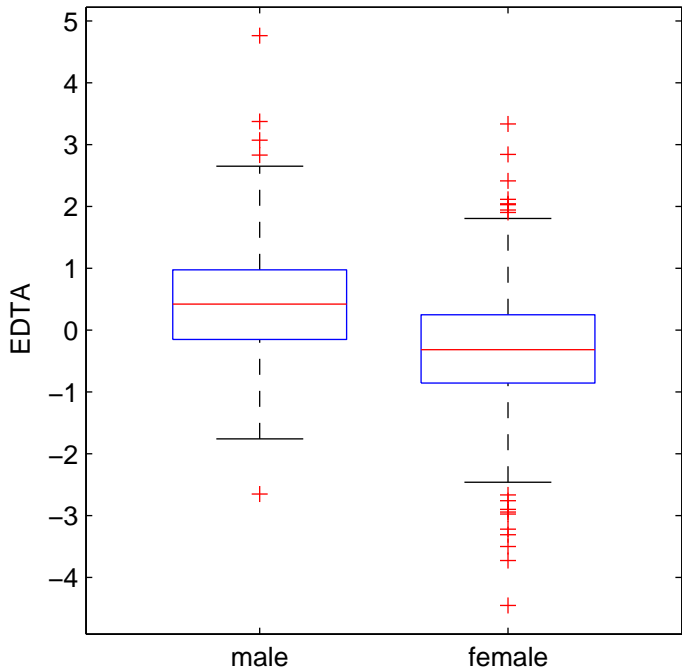

p-val: 1.09e-002

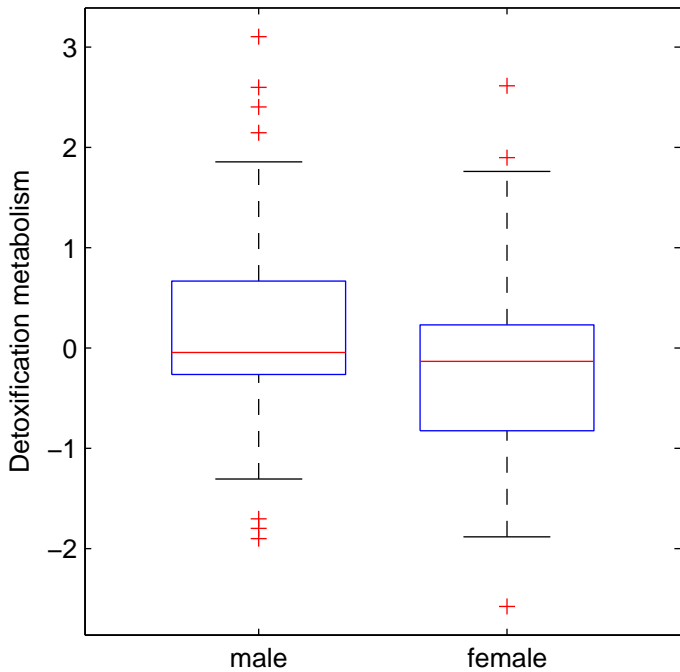

p-val: 2.64e-065

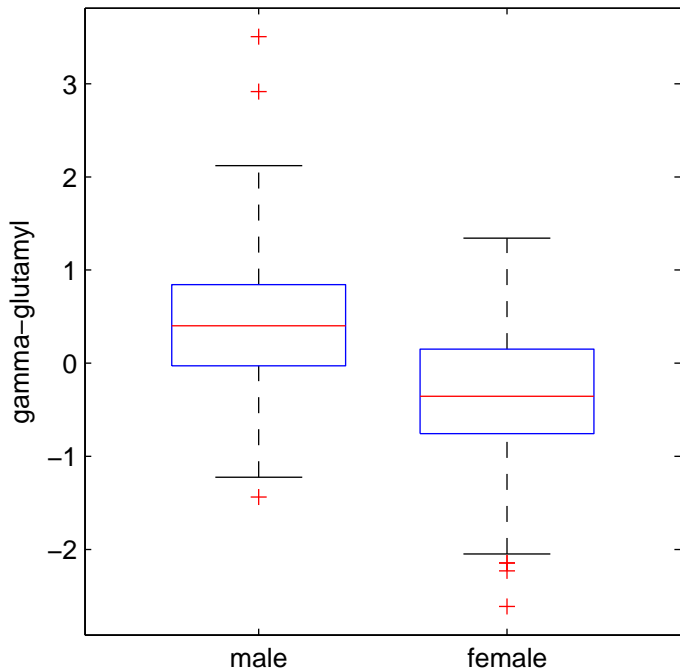

p-val: 5.84e-057

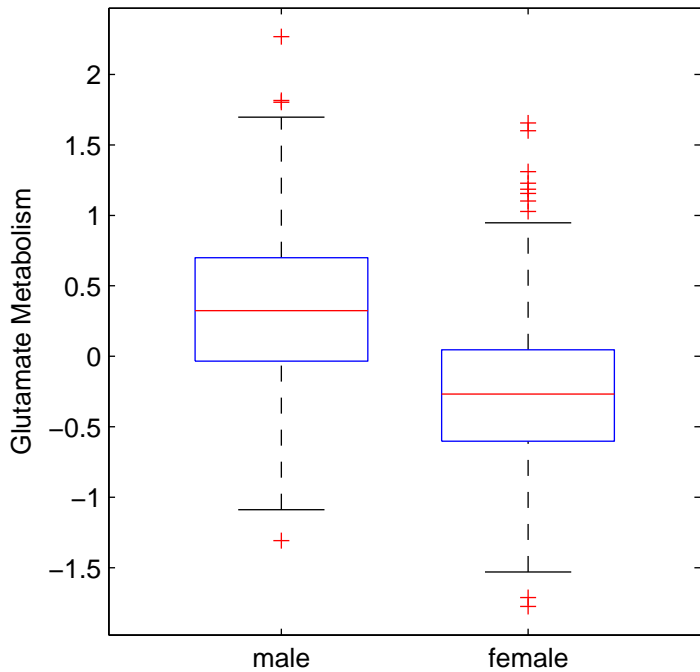

p-val: 1.06e-008

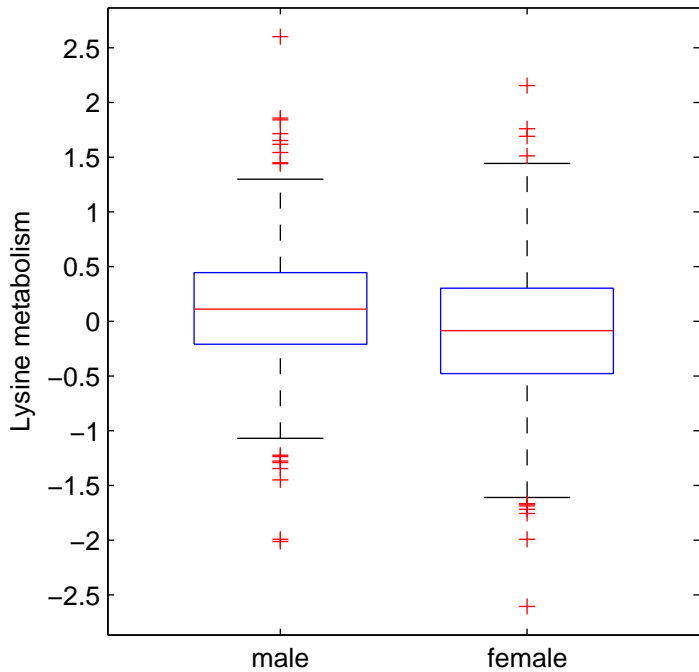



p-val: 2.62e-002

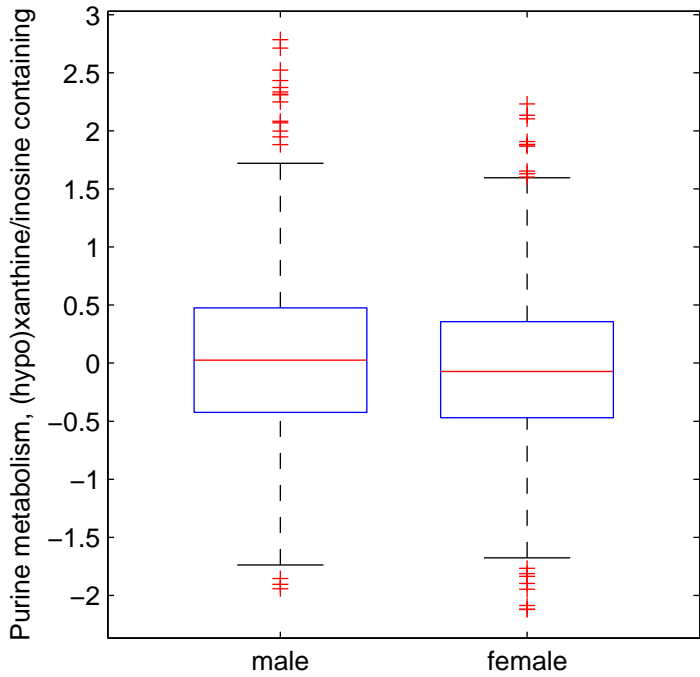

Fructose, mannose, galactose, starch, and sucrose metabolism

p-val: 2.53e-004

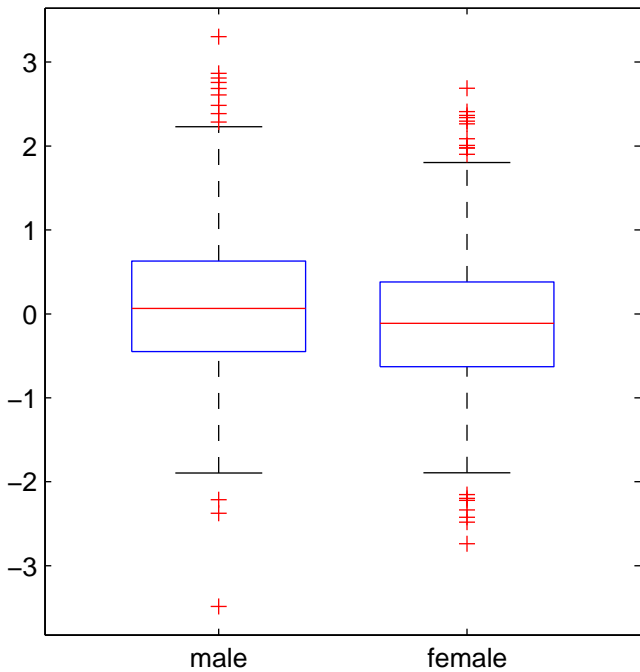

p-val: 3.43e-019

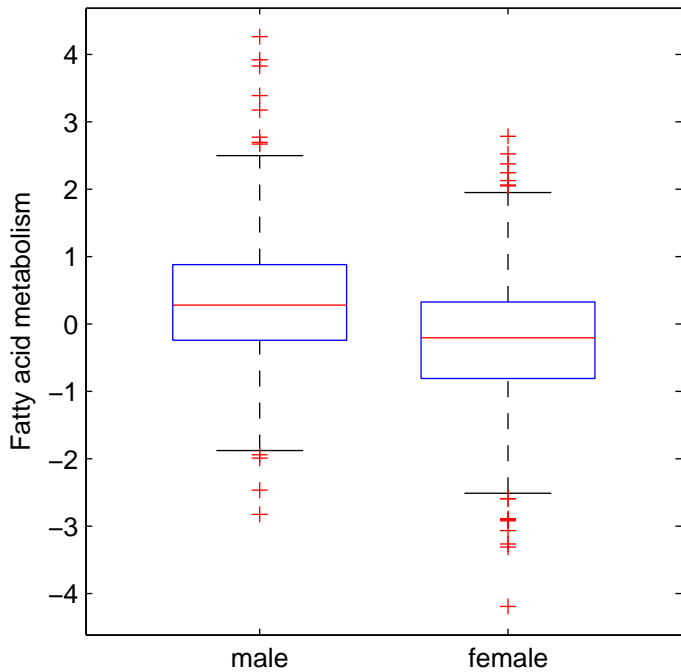

p-val: 3.42e-001

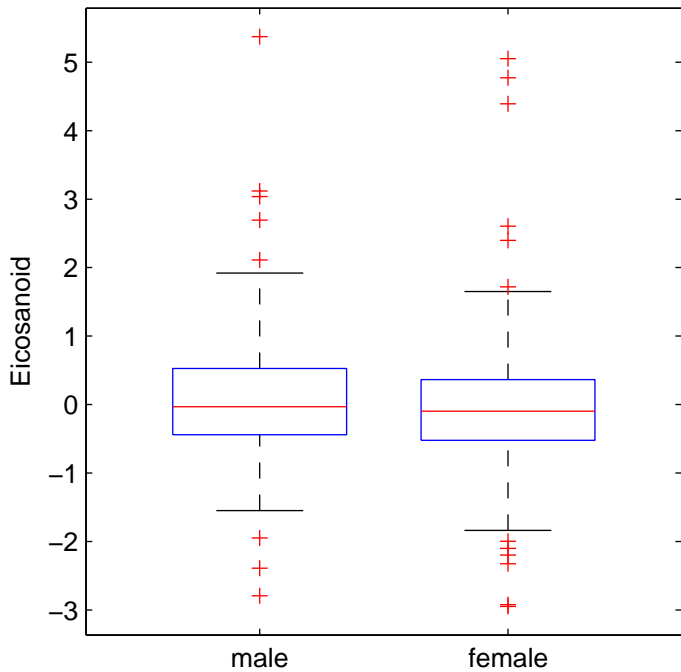

p-val: 3.52e-012

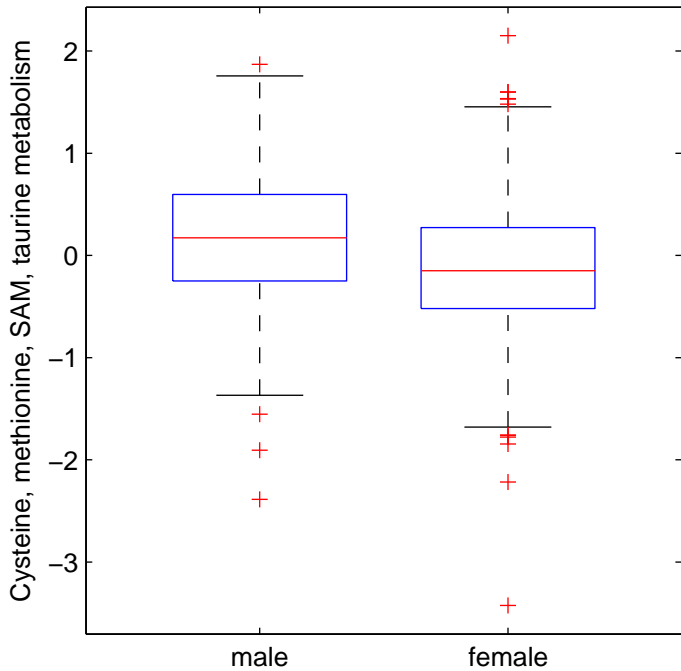

p-val: 4.59e-001

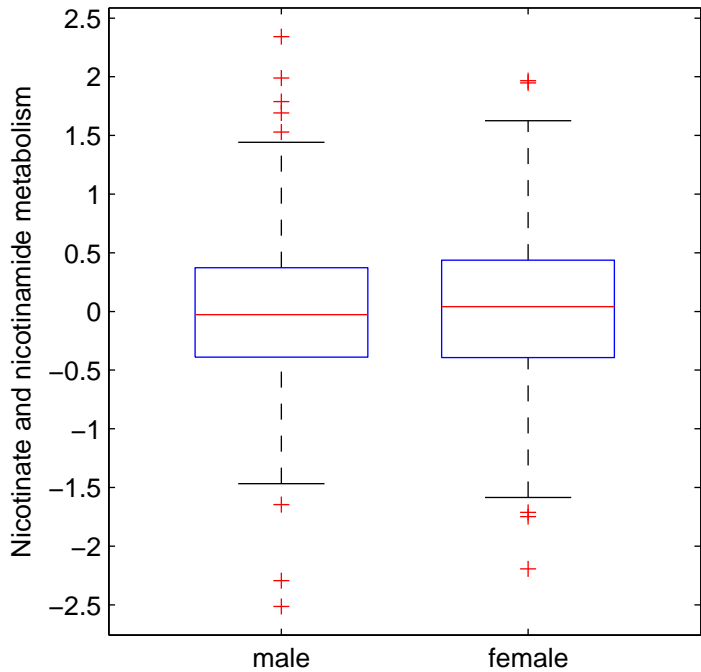

p-val: 1.52e-002

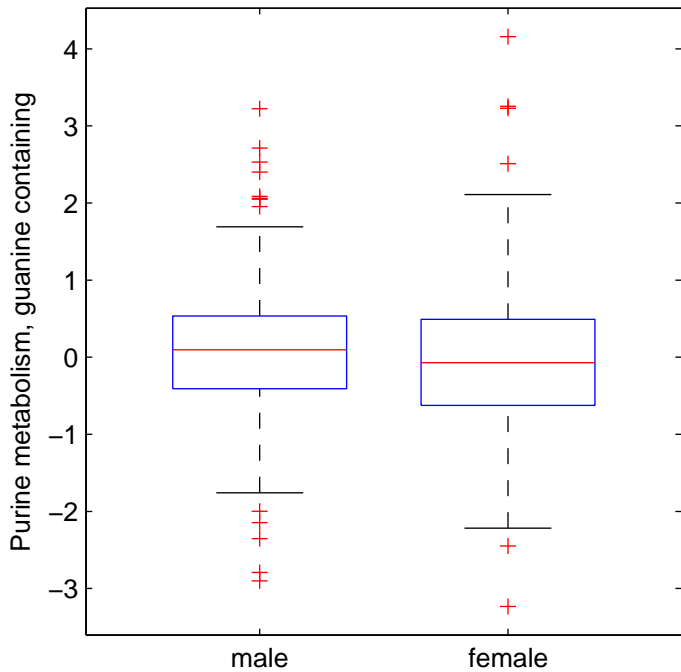

p-val: 1.42e-002

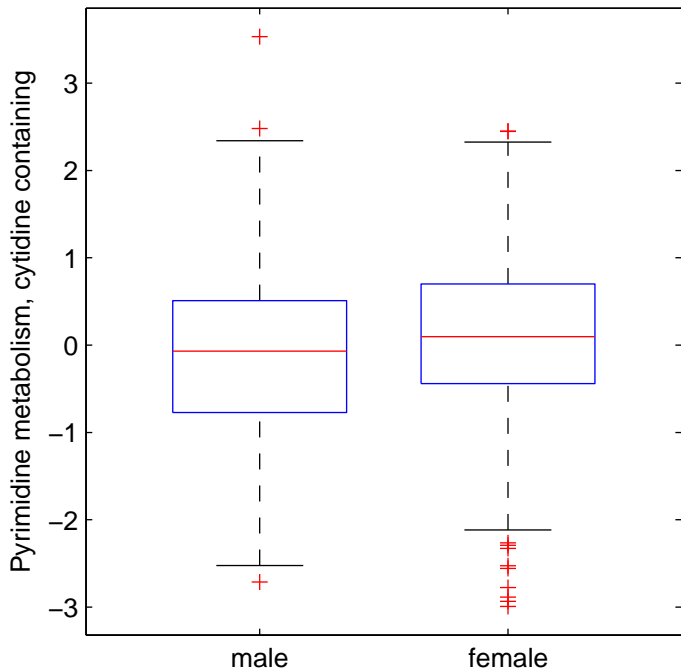



p-val: 4.22e-001

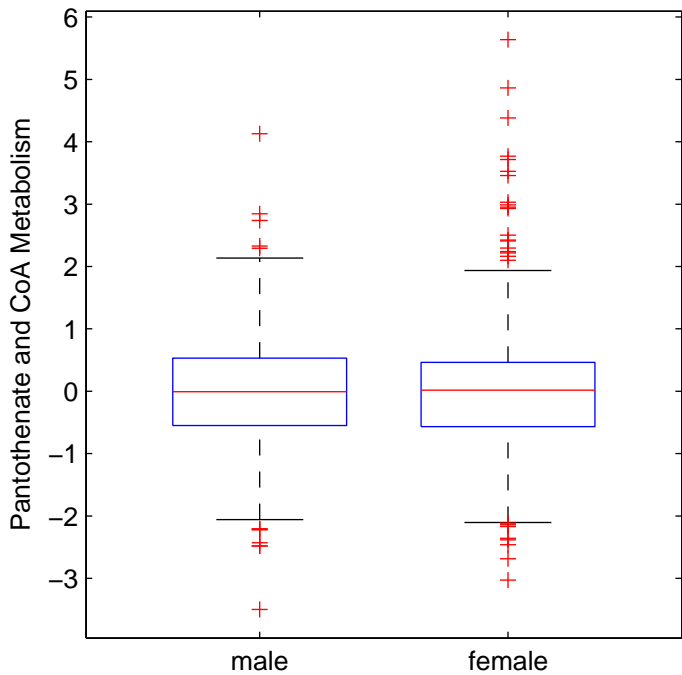

p-val: 1.83e-019

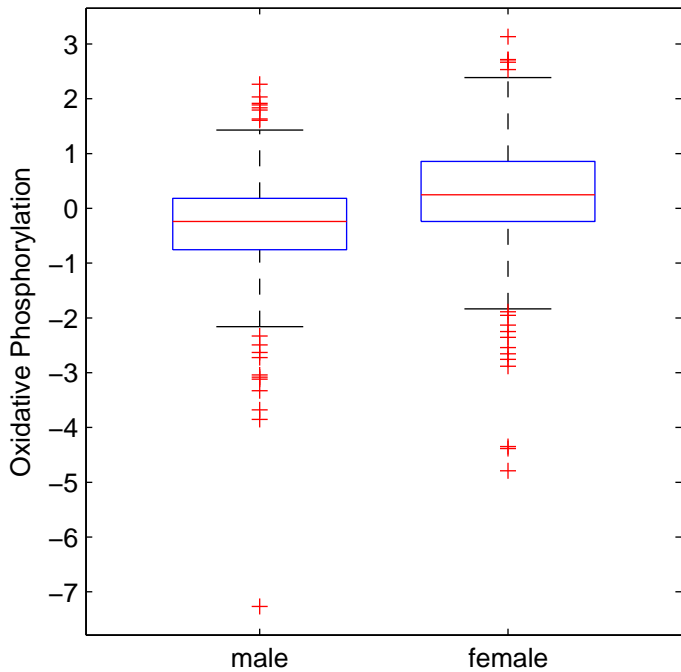

p-val: 4.57e-001

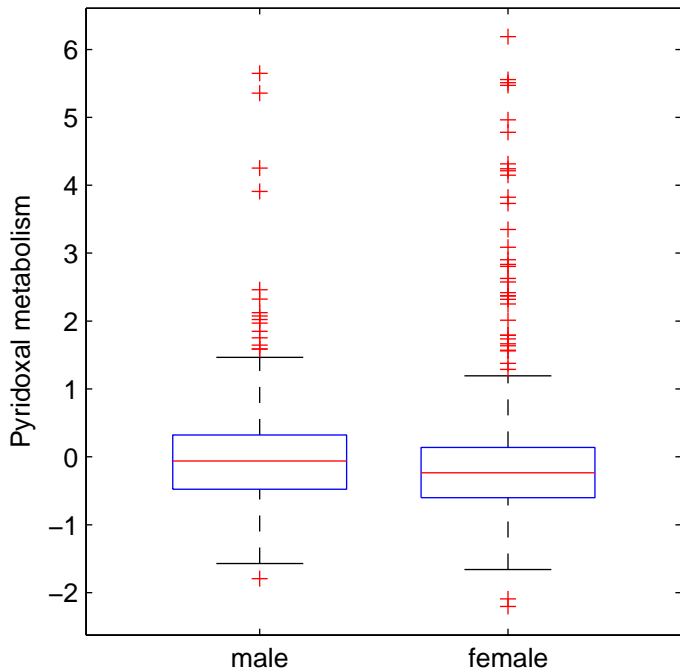

p-val: 7.97e-001

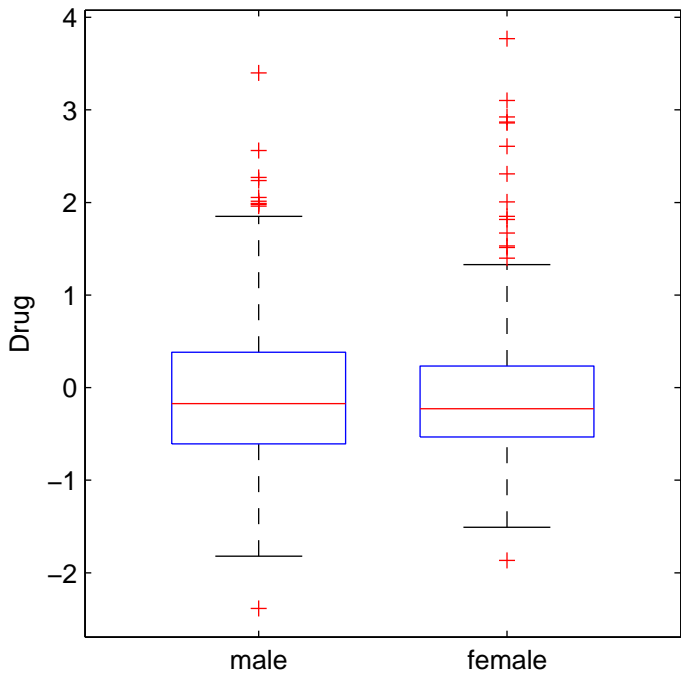

p-val: 3.44e-002

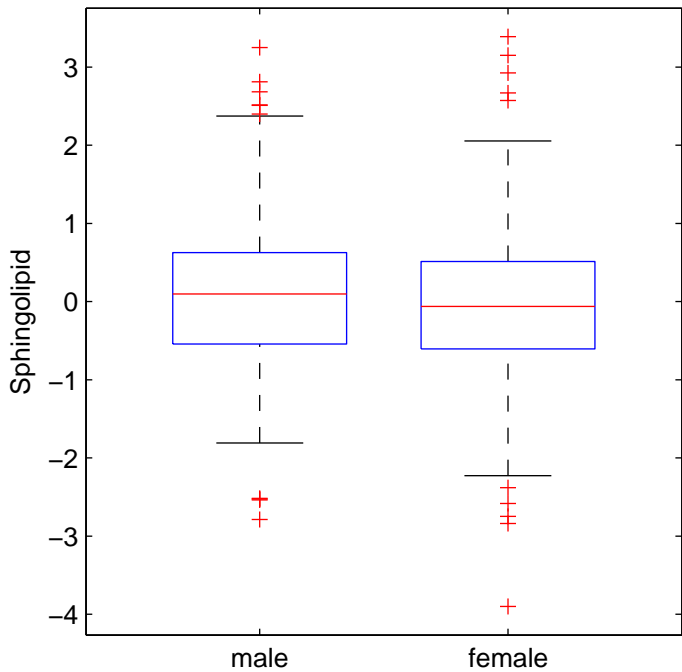

p-val: 1.08e-052

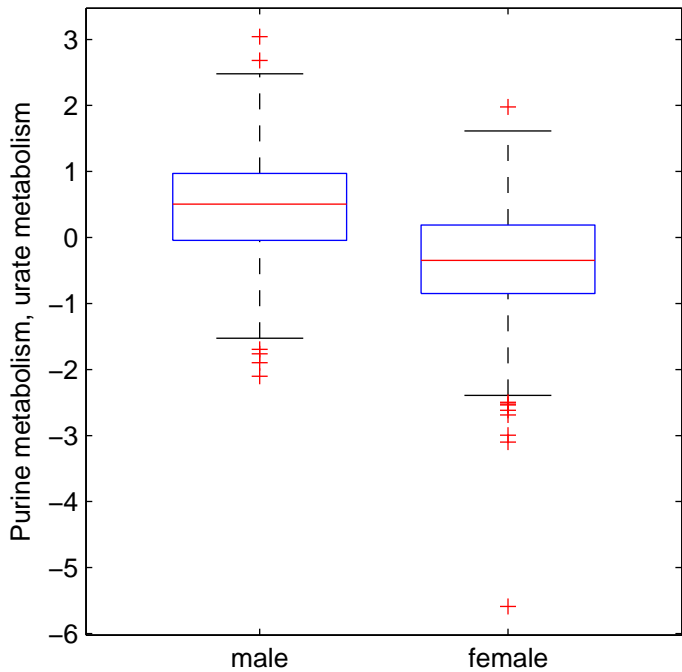

p-val: 3.64e-019

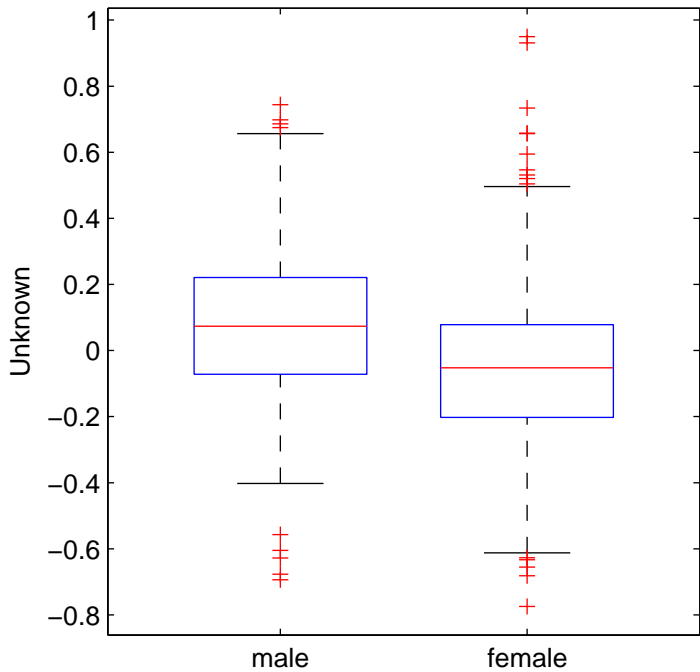

p-val: 7.18e-003

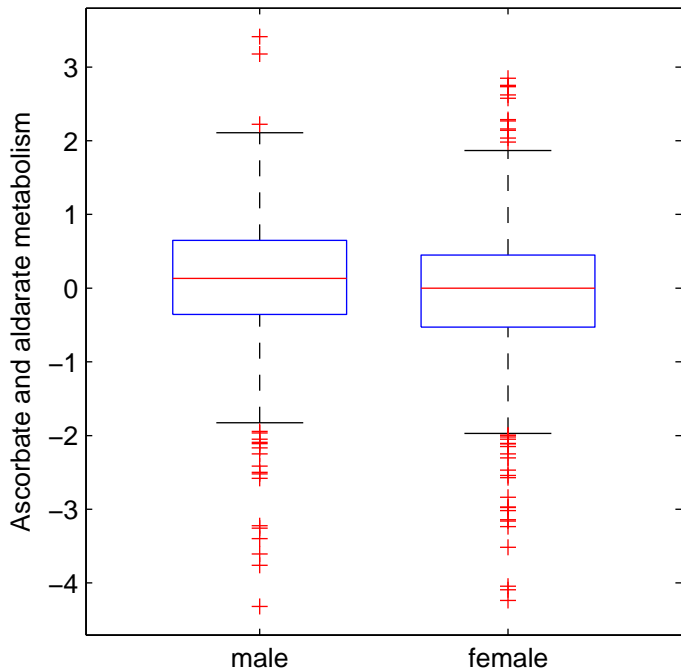



p-val: 5.68e-002

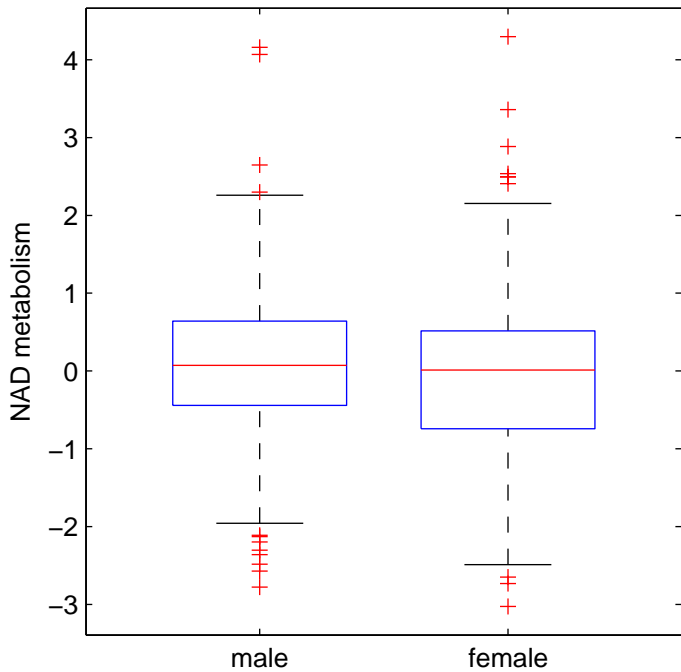

Supplement: 11306_2015_829_MOESM3_ESM.pdf [file 11306_2015_829_MOESM3_ESM.pdf]
