# Supplementary material for: Gender-specific pathway differences in the human serum metabolome
Source: Springer Nature journal article supplement (doi:10.1007/s11306-015-0829-0), 2015-08-03
Supplement: 11306_2015_829_MOESM8_ESM.pdf [file 11306_2015_829_MOESM8_ESM.pdf]

## Supplementary material 8: Sex-specific genome-wide association study

This supplementary text contains detailed statistics and plots for the genome-wide significant hit.

### Genome-wide significant differences

| Metabolite | SNP       | chr | pos       | info | MAF<br>(f/m) | females |       |         | males   |       |         | p-val<br>$\beta$ diff | count<br>(f/m) |
|------------|-----------|-----|-----------|------|--------------|---------|-------|---------|---------|-------|---------|-----------------------|----------------|
|            |           |     |           |      |              | $\beta$ | SE    | p-val   | $\beta$ | SE    | p-val   |                       |                |
| glycine    | rs1047891 | 2   | 211540507 | 0.95 | 0.32/0.32    | 0.09    | 0.006 | 1.8E-45 | 0.03    | 0.005 | 1.3E-06 | 7.2E-14               | 872/823        |
| glycine    | rs715     | 2   | 211543055 | 1.00 | 0.31/0.31    | 0.08    | 0.006 | 1.6E-43 | 0.02    | 0.005 | 3.7E-06 | 1.5E-13               | 872/823        |

**Explanations:** chr = chromosome, pos = chromosomal position, info = imputation quality, MAF = major allele frequency,  $\beta$  = effect size from additive genetic model, SE = standard error

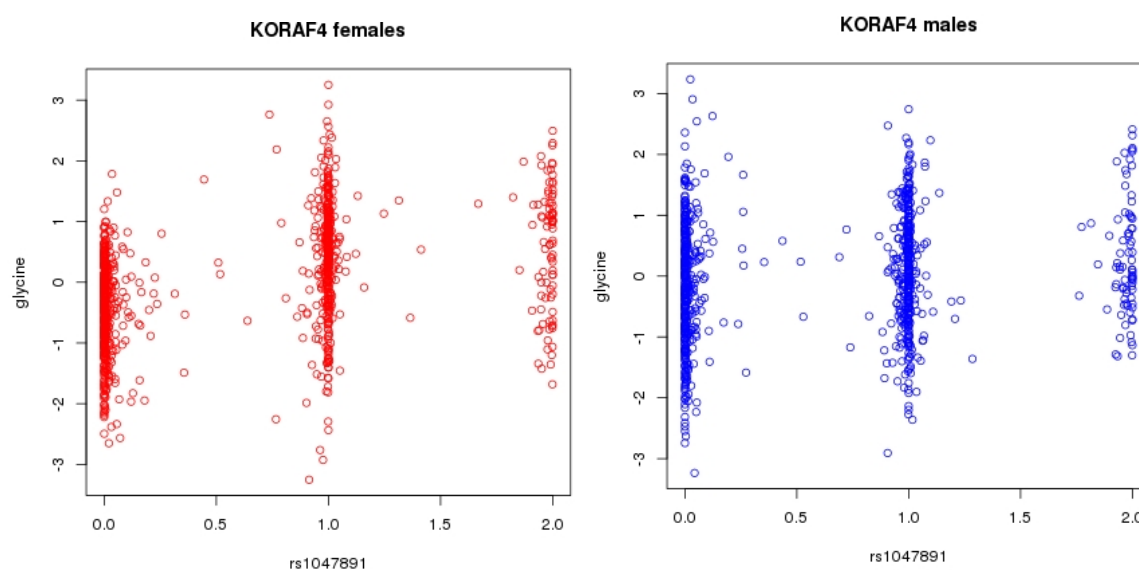

**Figure:** Associations between glycine and rs1047891 stratified by females and males. Note that genotypes on the x-axis can have non-integer values due to the imputation process.
