# Supplementary material for: Gender-specific pathway differences in the human serum metabolome
Source: Springer Nature journal article supplement (doi:10.1007/s11306-015-0829-0), 2015-08-03
Supplement: 11306_2015_829_MOESM10_ESM.pdf [file 11306_2015_829_MOESM10_ESM.pdf]

## Supplementary material 10: Tests for non-normality

For each metabolite in the KORA discovery cohort, the non-normality of both log<sub>10</sub>-transformed and non-transformed concentrations was assessed using Kolmogorov-Smirnov tests [1]. The following plot shows the log<sub>10</sub> p-values for each metabolite:

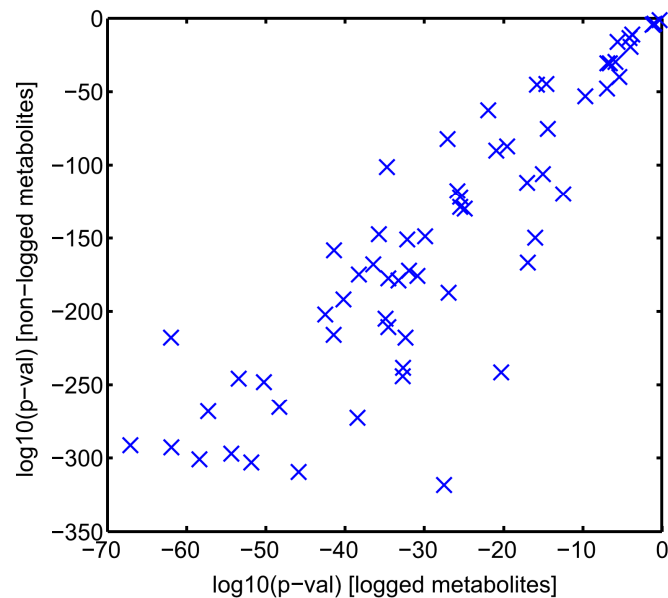

The non-logarithmized metabolite concentration distributions are substantially less normal, i.e. have lower p-values from the Kolmogorov-Smirnov tests. It is to be noted that also the p-values for logarithmized concentrations are very low, which can be attributed to the high sample number ( $n=1,756$ ) in the dataset. There are ongoing discussions in the community that for sufficiently large sample sizes, the normality assumption of a statistical test will not be a major issue [2]. Nevertheless, logarithmizing concentrations appears to ensure “more normal” distributions than non-transformed data.

### References

1. Massey FJ Jr. The Kolmogorov-Smirnov Test for Goodness of Fit. *J Am Stat Assoc.* 1951;46: 68–78. doi:10.2307/2280095
2. Ghasemi A, Zahediasl S. Normality Tests for Statistical Analysis: A Guide for Non-Statisticians. *Int J Endocrinol Metab.* 2012;10: 486–489. doi:10.5812/ijem.3505
